# Supplementary material for: Integrated genomic analyses of lung squamous cell carcinoma for identification of a possible competitive endogenous RNA network by means of TCGA datasets
Source: PeerJ. 2018 Jan 12;6:e4254. doi: 10.7717/peerj.4254 (PMC5768173; doi:10.7717/peerj.4254)
Supplement: Supplemental Information 2 [file peerj-06-4254-s002.xlsx]

## Sheet: nationwidechildrens.org_clinica
bcr_patient_uuid	bcr_patient_barcode	form_completion_date	histologic_diagnosis	prospective_collection	retrospective_collection	gender	race	ethnicity	laterality	history_other_malignancy	anatomic_organ_subdivision	location_lung_parenchyma	histologic_diagnosis	initial_pathologic_dx_year	method_initial_path_dx	method_initial_path_dx_other	residual_tumor	ajcc_staging_edition	ajcc_tumor_pathologic_pt	ajcc_nodes_pathologic_pn	ajcc_metastasis_pathologic_pm	ajcc_pathologic_tumor_stage	ajcc_tumor_clinical_ct	ajcc_nodes_clinical_cn	ajcc_metastasis_clinical_cm	ajcc_clinical_tumor_stage	pulmonary_function_test_indicator	fev1_percent_ref_prebroncholiator	fev1_percent_ref_postbroncholiator	fev1_fvc_ratio_prebroncholiator	fev1_fvc_ratio_postbroncholiator	carbon_monoxide_diffusion_dlco	kras_gene_analysis_indicator	kras_mutation_found	kras_mutation_identified_type	egfr_mutation_status	egfr_mutation_identified_type	eml4_alk_translocation_status	eml4_alk_translocation_variant	history_neoadjuvant_treatment	eml4_alk_analysis_type	tobacco_smoking_history_indicator	tobacco_smoking_year_started	tobacco_smoking_year_stopped	vital_status	tobacco_smoking_pack_years_smoked	karnofsky_score	ecog_score	performance_status_timing
bcr_patient_uuid	bcr_patient_barcode	form_completion_date	diagnosis	tissue_prospective_collection_indicator	tissue_retrospective_collection_indicator	gender	race	ethnicity	laterality	other_dx	anatomic_neoplasm_subdivision	location_in_lung_parenchyma	histological_type	year_of_initial_pathologic_diagnosis	initial_pathologic_diagnosis_method	init_pathology_dx_method_other	residual_tumor	system_version	pathologic_T	pathologic_N	pathologic_M	pathologic_stage	clinical_T	clinical_N	clinical_M	clinical_stage	pulmonary_function_test_performed	pre_bronchodilator_fev1_percent	post_bronchodilator_fev1_percent	pre_bronchodilator_fev1_fvc_percent	post_bronchodilator_fev1_fvc_percent	dlco_predictive_percent	kras_gene_analysis_performed	kras_mutation_found	kras_mutation_result	egfr_mutation_performed	egfr_mutation_result	eml4_alk_translocation_performed	eml4_alk_translocation_result	history_of_neoadjuvant_treatment	eml4_alk_translocation_method	tobacco_smoking_history	year_of_tobacco_smoking_onset	stopped_smoking_year	vital_status	number_pack_years_smoked	karnofsky_performance_score	eastern_cancer_oncology_group	performance_status_scale_timing
CDE_ID:	CDE_ID:2673794	CDE_ID:	CDE_ID:3081932	CDE_ID:3088492	CDE_ID:3088528	CDE_ID:2200604	CDE_ID:2192199	CDE_ID:2192217	CDE_ID:827	CDE_ID:3382736	CDE_ID:3108203	CDE_ID:3139453	CDE_ID:3081934	CDE_ID:2896960	CDE_ID:2757941	CDE_ID:2757948	CDE_ID:2608702	CDE_ID:2722309	CDE_ID:3045435	CDE_ID:3203106	CDE_ID:3045439	CDE_ID:3203222	CDE_ID:3440328	CDE_ID:3440330	CDE_ID:3440331	CDE_ID:3440332	CDE_ID:2556486	CDE_ID:3302947	CDE_ID:3302948	CDE_ID:3302955	CDE_ID:3302956	CDE_ID:2180255	CDE_ID:3123147	CDE_ID:2932340	CDE_ID:3147614	CDE_ID:3139429	CDE_ID:3147627	CDE_ID:3139437	CDE_ID:3139445	CDE_ID:3382737	CDE_ID:3139449	CDE_ID:2181650	CDE_ID:2228604	CDE_ID:2228610	CDE_ID:5	CDE_ID:2955385	CDE_ID:2003853	CDE_ID:88	CDE_ID:2792763
95b83006-02c9-4c4d-bf84-a45115f7d86d	TCGA-18-3406	2011-03-09	Lung Squamous Cell Carcinoma	NO	YES	MALE	WHITE	NOT HISPANIC OR LATINO	[Not Available]	Yes	L-Upper	[Not Available]	Lung Squamous Cell Carcinoma- Not Otherwise Specified (NOS)	2003	[Not Available]	[Not Available]	R0	[Not Available]	T1	N0	M0	Stage IA	[Not Applicable]	[Not Applicable]	[Not Applicable]	[Not Applicable]	[Not Available]	[Not Available]	[Not Available]	[Not Available]	[Not Available]	[Not Available]	[Not Available]	[Not Available]	[Not Available]	[Not Available]	[Not Available]	[Not Available]	[Not Available]	No	[Not Available]	4	1951	[Not Available]	Dead	200	0	[Not Available]	[Not Available]
4e1ad82e-23c8-44bb-b74e-a3d0b1126b96	TCGA-18-3407	2011-03-09	Lung Squamous Cell Carcinoma	NO	YES	MALE	ASIAN	NOT HISPANIC OR LATINO	[Not Available]	Yes	L-Upper	[Not Available]	Lung Squamous Cell Carcinoma- Not Otherwise Specified (NOS)	2003	[Not Available]	[Not Available]	R0	[Not Available]	T2	N0	M0	Stage IB	[Not Applicable]	[Not Applicable]	[Not Applicable]	[Not Applicable]	[Not Available]	[Not Available]	[Not Available]	[Not Available]	[Not Available]	[Not Available]	[Not Available]	[Not Available]	[Not Available]	[Not Available]	[Not Available]	[Not Available]	[Not Available]	No	[Not Available]	3	[Not Available]	1988	Dead	40	0	[Not Available]	[Not Available]
d4bc755a-2585-4529-ae36-7e1d88bdecfe	TCGA-18-3408	2011-03-09	Lung Squamous Cell Carcinoma	NO	YES	FEMALE	WHITE	NOT HISPANIC OR LATINO	[Not Available]	No	R-Lower	[Not Available]	Lung Squamous Cell Carcinoma- Not Otherwise Specified (NOS)	2004	[Not Available]	[Not Available]	R0	[Not Available]	T2	N0	M0	Stage IB	[Not Applicable]	[Not Applicable]	[Not Applicable]	[Not Applicable]	[Not Available]	[Not Available]	[Not Available]	[Not Available]	[Not Available]	[Not Available]	[Not Available]	[Not Available]	[Not Available]	[Not Available]	[Not Available]	[Not Available]	[Not Available]	No	[Not Available]	4	[Not Available]	2004	Alive	30	[Not Available]	[Not Available]	[Not Available]
b09e872a-e837-49ec-8a27-84dcdcabf347	TCGA-18-3409	2011-03-17	Lung Squamous Cell Carcinoma	NO	YES	MALE	WHITE	NOT HISPANIC OR LATINO	[Not Available]	Yes	L-Upper	[Not Available]	Lung Basaloid Squamous Cell Carcinoma	2004	[Not Available]	[Not Available]	R0	6th	T1	N0	M0	Stage IA	[Not Applicable]	[Not Applicable]	[Not Applicable]	[Not Applicable]	NO	[Not Available]	[Not Available]	[Not Available]	[Not Available]	[Not Available]	[Not Available]	[Not Available]	[Not Available]	[Not Available]	[Not Available]	[Not Available]	[Not Available]	No	[Not Available]	3	[Not Available]	1974	Alive	20	[Not Available]	[Not Available]	[Not Available]
99599b60-4f5c-456b-8755-371b1aa7074e	TCGA-18-3410	2011-04-04	Lung Squamous Cell Carcinoma	NO	YES	MALE	[Not Available]	[Not Available]	[Not Available]	Yes	R-Lower	Peripheral Lung	Lung Squamous Cell Carcinoma- Not Otherwise Specified (NOS)	2004	[Not Available]	[Not Available]	R0	[Not Available]	T3	N0	M0	Stage IIB	[Not Applicable]	[Not Applicable]	[Not Applicable]	[Not Applicable]	[Not Available]	[Not Available]	[Not Available]	[Not Available]	[Not Available]	[Not Available]	[Not Available]	[Not Available]	[Not Available]	[Not Available]	[Not Available]	[Not Available]	[Not Available]	No	[Not Available]	3	[Not Available]	[Not Available]	Dead	[Not Available]	0	[Not Available]	[Not Available]
f1a1bbf9-4751-4fb4-8a2b-19f8d4ba57bd	TCGA-18-3411	2011-03-17	Lung Squamous Cell Carcinoma	NO	YES	FEMALE	[Not Available]	[Not Available]	[Not Available]	No	R-Upper	[Not Available]	Lung Squamous Cell Carcinoma- Not Otherwise Specified (NOS)	2005	[Not Available]	[Not Available]	R0	[Not Available]	T2	N2	M0	Stage IIIA	[Not Applicable]	[Not Applicable]	[Not Applicable]	[Not Applicable]	[Not Available]	[Not Available]	[Not Available]	[Not Available]	[Not Available]	[Not Available]	[Not Available]	[Not Available]	[Not Available]	[Not Available]	[Not Available]	[Not Available]	[Not Available]	No	[Not Available]	2	[Not Available]	[Not Available]	Alive	50	[Not Available]	[Not Available]	[Not Available]
c8802713-b814-4b55-993f-3ffebf8c3ab8	TCGA-18-3412	2011-03-25	Lung Squamous Cell Carcinoma	NO	YES	MALE	WHITE	NOT HISPANIC OR LATINO	[Not Available]	No	L-Lower	Central Lung	Lung Squamous Cell Carcinoma- Not Otherwise Specified (NOS)	2005	[Not Available]	[Not Available]	R0	[Not Available]	T2	N0	M0	Stage IB	[Not Applicable]	[Not Applicable]	[Not Applicable]	[Not Applicable]	[Not Available]	[Not Available]	[Not Available]	[Not Available]	[Not Available]	[Not Available]	[Not Available]	[Not Available]	[Not Available]	[Not Available]	[Not Available]	[Not Available]	[Not Available]	No	[Not Available]	4	[Not Available]	1995	Dead	25	[Not Available]	[Not Available]	[Not Available]
af1d9d69-0a45-4ad3-9873-57fbe4a4b895	TCGA-18-3414	2011-03-25	Lung Squamous Cell Carcinoma	NO	YES	MALE	ASIAN	NOT HISPANIC OR LATINO	[Not Available]	No	R-Lower	[Not Available]	Lung Squamous Cell Carcinoma- Not Otherwise Specified (NOS)	2005	[Not Available]	[Not Available]	R0	[Not Available]	T4	N1	M1	Stage IV	[Not Applicable]	[Not Applicable]	[Not Applicable]	[Not Applicable]	[Not Available]	[Not Available]	[Not Available]	[Not Available]	[Not Available]	[Not Available]	[Not Available]	[Not Available]	[Not Available]	[Not Available]	[Not Available]	[Not Available]	[Not Available]	No	[Not Available]	4	[Not Available]	1997	Dead	25	0	[Not Available]	[Not Available]
9a874b64-d0d6-416e-97bc-e9071ed0b16b	TCGA-18-3415	2011-03-25	Lung Squamous Cell Carcinoma	NO	YES	MALE	[Not Available]	[Not Available]	[Not Available]	No	R-Upper	[Not Available]	Lung Squamous Cell Carcinoma- Not Otherwise Specified (NOS)	2006	[Not Available]	[Not Available]	R0	[Not Available]	T2	N0	M0	Stage IB	[Not Applicable]	[Not Applicable]	[Not Applicable]	[Not Applicable]	[Not Available]	[Not Available]	[Not Available]	[Not Available]	[Not Available]	[Not Available]	[Not Available]	[Not Available]	[Not Available]	[Not Available]	[Not Available]	[Not Available]	[Not Available]	No	[Not Available]	3	[Not Available]	1975	Alive	30	[Not Available]	[Not Available]	[Not Available]
6eb61cab-8e83-4c18-a59a-ae0985ec9d2e	TCGA-18-3416	2011-03-25	Lung Squamous Cell Carcinoma	NO	YES	MALE	[Not Available]	[Not Available]	[Not Available]	Yes	L-Upper	[Not Available]	Lung Squamous Cell Carcinoma- Not Otherwise Specified (NOS)	2006	[Not Available]	[Not Available]	R0	[Not Available]	T2	N1	M0	Stage IIB	[Not Applicable]	[Not Applicable]	[Not Applicable]	[Not Applicable]	[Not Available]	[Not Available]	[Not Available]	[Not Available]	[Not Available]	[Not Available]	[Not Available]	[Not Available]	[Not Available]	[Not Available]	[Not Available]	[Not Available]	[Not Available]	No	[Not Available]	3	[Not Available]	[Not Available]	Alive	40	[Not Available]	[Not Available]	[Not Available]
e28cbc9a-aa60-4bfb-8d89-8c33ee97f560	TCGA-18-3417	2011-03-25	Lung Squamous Cell Carcinoma	NO	YES	MALE	[Not Available]	[Not Available]	[Not Available]	No	R-Upper	[Not Available]	Lung Squamous Cell Carcinoma- Not Otherwise Specified (NOS)	2006	[Not Available]	[Not Available]	R0	[Not Available]	T2	N1	M1	Stage IV	[Not Applicable]	[Not Applicable]	[Not Applicable]	[Not Applicable]	[Not Available]	[Not Available]	[Not Available]	[Not Available]	[Not Available]	[Not Available]	[Not Available]	[Not Available]	[Not Available]	[Not Available]	[Not Available]	[Not Available]	[Not Available]	No	[Not Available]	3	1963	1989	Alive	25	[Not Available]	[Not Available]	[Not Available]
03fa3310-406d-4c12-a409-136fc47d996d	TCGA-18-3419	2011-03-25	Lung Squamous Cell Carcinoma	NO	YES	MALE	[Not Available]	[Not Available]	[Not Available]	No	L-Lower	[Not Available]	Lung Squamous Cell Carcinoma- Not Otherwise Specified (NOS)	2007	[Not Available]	[Not Available]	R0	[Not Available]	T2	N1	M0	Stage IIB	[Not Applicable]	[Not Applicable]	[Not Applicable]	[Not Applicable]	[Not Available]	[Not Available]	[Not Available]	[Not Available]	[Not Available]	[Not Available]	[Not Available]	[Not Available]	[Not Available]	[Not Available]	[Not Available]	[Not Available]	[Not Available]	No	[Not Available]	4	[Not Available]	2002	Alive	50	[Not Available]	[Not Available]	[Not Available]
34d5d8b7-9737-43fa-86fe-7c2885c787cf	TCGA-18-3421	2011-04-04	Lung Squamous Cell Carcinoma	NO	YES	MALE	WHITE	NOT HISPANIC OR LATINO	[Not Available]	No	R-Lower	[Not Available]	Lung Squamous Cell Carcinoma- Not Otherwise Specified (NOS)	2007	[Not Available]	[Not Available]	R0	[Not Available]	T2	N0	M0	Stage IB	[Not Applicable]	[Not Applicable]	[Not Applicable]	[Not Applicable]	[Not Available]	[Not Available]	[Not Available]	[Not Available]	[Not Available]	[Not Available]	[Not Available]	[Not Available]	[Not Available]	[Not Available]	[Not Available]	[Not Available]	[Not Available]	No	[Not Available]	4	[Not Available]	2007	Alive	40	[Not Available]	[Not Available]	[Not Available]
a33f0741-2161-4818-89f2-ec8ccae57949	TCGA-18-4083	2011-04-04	Lung Squamous Cell Carcinoma	NO	YES	MALE	WHITE	NOT HISPANIC OR LATINO	[Not Available]	Yes	L-Lower	[Not Available]	Lung Squamous Cell Carcinoma- Not Otherwise Specified (NOS)	2005	[Not Available]	[Not Available]	R0	[Not Available]	T2	N1	M0	Stage IIB	[Not Applicable]	[Not Applicable]	[Not Applicable]	[Not Applicable]	[Not Available]	[Not Available]	[Not Available]	[Not Available]	[Not Available]	[Not Available]	[Not Available]	[Not Available]	[Not Available]	[Not Available]	[Not Available]	[Not Available]	[Not Available]	No	[Not Available]	2	[Not Available]	[Not Available]	Dead	45	[Not Available]	[Not Available]	[Not Available]
4c806d29-1674-4542-9f30-5c9a0fc184c4	TCGA-18-4086	2011-04-04	Lung Squamous Cell Carcinoma	NO	YES	MALE	[Not Available]	[Not Available]	[Not Available]	No	R-Lower	[Not Available]	Lung Squamous Cell Carcinoma- Not Otherwise Specified (NOS)	2009	[Not Available]	[Not Available]	R0	[Not Available]	T2	N0	M0	Stage IB	[Not Applicable]	[Not Applicable]	[Not Applicable]	[Not Applicable]	[Not Available]	[Not Available]	[Not Available]	[Not Available]	[Not Available]	[Not Available]	[Not Available]	[Not Available]	[Not Available]	[Not Available]	[Not Available]	[Not Available]	[Not Available]	No	[Not Available]	4	[Not Available]	2001	Dead	30	[Not Available]	[Not Available]	[Not Available]
19f0cb8c-2e57-4310-967f-a9890f1605db	TCGA-18-4721	2011-04-04	Lung Squamous Cell Carcinoma	NO	YES	MALE	WHITE	NOT HISPANIC OR LATINO	[Not Available]	No	L-Lower	[Not Available]	Lung Squamous Cell Carcinoma- Not Otherwise Specified (NOS)	2002	[Not Available]	[Not Available]	R0	[Not Available]	T1	N0	M0	Stage IA	[Not Applicable]	[Not Applicable]	[Not Applicable]	[Not Applicable]	[Not Available]	[Not Available]	[Not Available]	[Not Available]	[Not Available]	[Not Available]	[Not Available]	[Not Available]	[Not Available]	[Not Available]	[Not Available]	[Not Available]	[Not Available]	No	[Not Available]	4	[Not Available]	2001	Alive	[Not Available]	[Not Available]	[Not Available]	[Not Available]
2c89b366-c394-4067-bbb0-f24f5920ecaa	TCGA-18-5592	2011-04-27	Lung Squamous Cell Carcinoma	NO	YES	MALE	[Not Available]	[Not Available]	[Not Available]	No	L-Upper	[Not Available]	Lung Squamous Cell Carcinoma- Not Otherwise Specified (NOS)	2010	[Not Available]	[Not Available]	R0	[Not Available]	T3	N0	M0	Stage IIB	[Not Applicable]	[Not Applicable]	[Not Applicable]	[Not Applicable]	[Not Available]	[Not Available]	[Not Available]	[Not Available]	[Not Available]	[Not Available]	[Not Available]	[Not Available]	[Not Available]	[Not Available]	[Not Available]	[Not Available]	[Not Available]	No	[Not Available]	3	[Not Available]	[Not Available]	Alive	40	[Not Available]	[Not Available]	[Not Available]
628b1bc3-825b-4d0e-a4cd-57eeaf98e798	TCGA-18-5595	2011-04-27	Lung Squamous Cell Carcinoma	NO	YES	MALE	[Not Available]	[Not Available]	[Not Available]	Yes	R-Lower	[Not Available]	Lung Squamous Cell Carcinoma- Not Otherwise Specified (NOS)	2008	[Not Available]	[Not Available]	R0	[Not Available]	T2	N0	M0	Stage IB	[Not Applicable]	[Not Applicable]	[Not Applicable]	[Not Applicable]	[Not Available]	[Not Available]	[Not Available]	[Not Available]	[Not Available]	[Not Available]	[Not Available]	[Not Available]	[Not Available]	[Not Available]	[Not Available]	[Not Available]	[Not Available]	No	[Not Available]	1	[Not Available]	[Not Available]	Dead	[Not Available]	[Not Available]	[Not Available]	[Not Available]
28f899c5-ea17-4df6-83e6-e744e04d0ea1	TCGA-21-1070	2010-02-24	Lung Squamous Cell Carcinoma	NO	YES	FEMALE	BLACK OR AFRICAN AMERICAN	NOT HISPANIC OR LATINO	[Not Available]	Yes	L-Upper	[Not Available]	Lung Squamous Cell Carcinoma- Not Otherwise Specified (NOS)	2000	[Not Available]	[Not Available]	R0	[Not Available]	T3	N0	M0	Stage IIIA	[Not Applicable]	[Not Applicable]	[Not Applicable]	[Not Applicable]	[Not Available]	[Not Available]	[Not Available]	[Not Available]	[Not Available]	[Not Available]	[Not Available]	[Not Available]	[Not Available]	[Not Available]	[Not Available]	[Not Available]	[Not Available]	No	[Not Available]	4	[Not Available]	1992	Alive	15	[Not Available]	[Not Available]	[Not Available]
d87e30a3-1b5a-41cf-bafe-27914a01c8d9	TCGA-21-1071	2010-02-23	Lung Squamous Cell Carcinoma	NO	YES	MALE	WHITE	NOT HISPANIC OR LATINO	[Not Available]	No	R-Upper	[Not Available]	Lung Squamous Cell Carcinoma- Not Otherwise Specified (NOS)	2001	[Not Available]	[Not Available]	R0	[Not Available]	T2	N0	M0	Stage IB	[Not Applicable]	[Not Applicable]	[Not Applicable]	[Not Applicable]	[Not Available]	[Not Available]	[Not Available]	[Not Available]	[Not Available]	[Not Available]	[Not Available]	[Not Available]	[Not Available]	[Not Available]	[Not Available]	[Not Available]	[Not Available]	No	[Not Available]	2	[Not Available]	[Not Available]	Dead	90	[Not Available]	[Not Available]	[Not Available]
6394fe4a-6034-4c79-b28f-aa43e3753730	TCGA-21-1072	2010-02-23	Lung Squamous Cell Carcinoma	NO	YES	MALE	WHITE	NOT HISPANIC OR LATINO	[Not Available]	No	[Discrepancy]	[Not Available]	Lung Squamous Cell Carcinoma- Not Otherwise Specified (NOS)	2001	[Not Available]	[Not Available]	R0	[Not Available]	T2	N0	M0	Stage IB	[Not Applicable]	[Not Applicable]	[Not Applicable]	[Not Applicable]	[Not Available]	[Not Available]	[Not Available]	[Not Available]	[Not Available]	[Not Available]	[Not Available]	[Not Available]	[Not Available]	[Not Available]	[Not Available]	[Not Available]	[Not Available]	No	[Not Available]	3	[Not Available]	[Not Available]	Alive	[Not Available]	[Not Available]	[Not Available]	[Not Available]
fde60f9f-5cff-405e-b0f6-e193195ebd53	TCGA-21-1075	2010-03-03	Lung Squamous Cell Carcinoma	NO	YES	MALE	WHITE	NOT HISPANIC OR LATINO	[Not Available]	No	L-Lower	[Not Available]	Lung Squamous Cell Carcinoma- Not Otherwise Specified (NOS)	2002	[Not Available]	[Not Available]	R0	[Not Available]	T2	N1	M0	Stage IIB	[Not Applicable]	[Not Applicable]	[Not Applicable]	[Not Applicable]	[Not Available]	[Not Available]	[Not Available]	[Not Available]	[Not Available]	[Not Available]	[Not Available]	[Not Available]	[Not Available]	[Not Available]	[Not Available]	[Not Available]	[Not Available]	No	[Not Available]	2	[Not Available]	[Not Available]	Alive	74	[Not Available]	[Not Available]	[Not Available]
220be009-8f1e-4a77-ab04-3220b5f87ea6	TCGA-21-1076	2010-03-03	Lung Squamous Cell Carcinoma	NO	YES	FEMALE	WHITE	NOT HISPANIC OR LATINO	[Not Available]	No	L-Lower	[Not Available]	Lung Squamous Cell Carcinoma- Not Otherwise Specified (NOS)	2005	[Not Available]	[Not Available]	R0	[Not Available]	T2	N0	M0	Stage IB	[Not Applicable]	[Not Applicable]	[Not Applicable]	[Not Applicable]	[Not Available]	[Not Available]	[Not Available]	[Not Available]	[Not Available]	[Not Available]	[Not Available]	[Not Available]	[Not Available]	[Not Available]	[Not Available]	[Not Available]	[Not Available]	No	[Not Available]	4	[Not Available]	1994	Alive	35	[Not Available]	[Not Available]	[Not Available]
f516991c-5139-4b3e-b605-5a3d90688209	TCGA-21-1077	2010-03-03	Lung Squamous Cell Carcinoma	NO	YES	MALE	WHITE	NOT HISPANIC OR LATINO	[Not Available]	Yes	R-Upper	[Not Available]	Lung Squamous Cell Carcinoma- Not Otherwise Specified (NOS)	2006	[Not Available]	[Not Available]	R0	[Not Available]	T2	N1	M0	Stage IIB	[Not Applicable]	[Not Applicable]	[Not Applicable]	[Not Applicable]	[Not Available]	[Not Available]	[Not Available]	[Not Available]	[Not Available]	[Not Available]	[Not Available]	[Not Available]	[Not Available]	[Not Available]	[Not Available]	[Not Available]	[Not Available]	No	[Not Available]	4	[Not Available]	1996	Dead	56	[Not Available]	[Not Available]	[Not Available]
0ab8d063-62b4-4d47-82aa-e3351a60029d	TCGA-21-1078	2010-03-04	Lung Squamous Cell Carcinoma	NO	YES	MALE	WHITE	NOT HISPANIC OR LATINO	[Not Available]	Yes	R-Lower	[Not Available]	Lung Squamous Cell Carcinoma- Not Otherwise Specified (NOS)	2006	[Not Available]	[Not Available]	R0	[Not Available]	T2	N0	M0	Stage IB	[Not Applicable]	[Not Applicable]	[Not Applicable]	[Not Applicable]	[Not Available]	[Not Available]	[Not Available]	[Not Available]	[Not Available]	[Not Available]	[Not Available]	[Not Available]	[Not Available]	[Not Available]	[Not Available]	[Not Available]	[Not Available]	No	[Not Available]	4	1947	2006	Dead	9	[Not Available]	[Not Available]	[Not Available]
a0b3fab8-7817-429b-aa34-7ef03e813313	TCGA-21-1079	2010-02-23	Lung Squamous Cell Carcinoma	NO	YES	MALE	WHITE	NOT HISPANIC OR LATINO	[Not Available]	No	L-Upper	[Not Available]	Lung Squamous Cell Carcinoma- Not Otherwise Specified (NOS)	1995	[Not Available]	[Not Available]	R0	[Not Available]	T3	N0	M0	Stage IIIA	[Not Applicable]	[Not Applicable]	[Not Applicable]	[Not Applicable]	[Not Available]	[Not Available]	[Not Available]	[Not Available]	[Not Available]	[Not Available]	[Not Available]	[Not Available]	[Not Available]	[Not Available]	[Not Available]	[Not Available]	[Not Available]	No	[Not Available]	3	[Not Available]	1980	Dead	80	[Not Available]	[Not Available]	[Not Available]
b9a81947-0348-4fe6-a0ac-d674cd13aa99	TCGA-21-1080	2010-02-23	Lung Squamous Cell Carcinoma	NO	YES	MALE	WHITE	NOT HISPANIC OR LATINO	[Not Available]	No	L-Lower	[Not Available]	Lung Squamous Cell Carcinoma- Not Otherwise Specified (NOS)	1996	[Not Available]	[Not Available]	R0	[Not Available]	T2	N0	M0	Stage IB	[Not Applicable]	[Not Applicable]	[Not Applicable]	[Not Applicable]	[Not Available]	[Not Available]	[Not Available]	[Not Available]	[Not Available]	[Not Available]	[Not Available]	[Not Available]	[Not Available]	[Not Available]	[Not Available]	[Not Available]	[Not Available]	No	[Not Available]	4	[Not Available]	1991	Alive	100	[Not Available]	[Not Available]	[Not Available]
2afa2fd8-e4d9-4e7b-b387-7e2451764d5d	TCGA-21-1081	2010-02-23	Lung Squamous Cell Carcinoma	NO	YES	MALE	WHITE	NOT HISPANIC OR LATINO	[Not Available]	No	L-Lower	[Not Available]	Lung Squamous Cell Carcinoma- Not Otherwise Specified (NOS)	1996	[Not Available]	[Not Available]	R0	[Not Available]	T2	N1	M0	Stage IIB	[Not Applicable]	[Not Applicable]	[Not Applicable]	[Not Applicable]	[Not Available]	[Not Available]	[Not Available]	[Not Available]	[Not Available]	[Not Available]	[Not Available]	[Not Available]	[Not Available]	[Not Available]	[Not Available]	[Not Available]	[Not Available]	No	[Not Available]	4	[Not Available]	1992	Dead	45	[Not Available]	[Not Available]	[Not Available]
0e2ee54a-51c9-4868-842d-a2a1c1cfb016	TCGA-21-1082	2010-02-23	Lung Squamous Cell Carcinoma	NO	YES	MALE	WHITE	NOT HISPANIC OR LATINO	[Not Available]	No	L-Lower	[Not Available]	Lung Squamous Cell Carcinoma- Not Otherwise Specified (NOS)	1997	[Not Available]	[Not Available]	R0	[Not Available]	T2	N0	M0	Stage IB	[Not Applicable]	[Not Applicable]	[Not Applicable]	[Not Applicable]	[Not Available]	[Not Available]	[Not Available]	[Not Available]	[Not Available]	[Not Available]	[Not Available]	[Not Available]	[Not Available]	[Not Available]	[Not Available]	[Not Available]	[Not Available]	No	[Not Available]	[Not Available]	[Not Available]	[Not Available]	Alive	[Not Available]	[Not Available]	[Not Available]	[Not Available]
0398eae1-7216-4595-80a5-6b117d96e070	TCGA-21-1083	2010-02-12	Lung Squamous Cell Carcinoma	NO	YES	MALE	WHITE	NOT HISPANIC OR LATINO	[Not Available]	Yes	L-Upper	[Not Available]	Lung Squamous Cell Carcinoma- Not Otherwise Specified (NOS)	1997	[Not Available]	[Not Available]	R0	[Not Available]	T1	N0	M0	Stage IA	[Not Applicable]	[Not Applicable]	[Not Applicable]	[Not Applicable]	[Not Available]	[Not Available]	[Not Available]	[Not Available]	[Not Available]	[Not Available]	[Not Available]	[Not Available]	[Not Available]	[Not Available]	[Not Available]	[Not Available]	[Not Available]	No	[Not Available]	2	[Not Available]	[Not Available]	Dead	240	[Not Available]	[Not Available]	[Not Available]
e21964b8-47c7-4a5f-bfa7-7206222883d2	TCGA-21-5782	2011-05-02	Lung Squamous Cell Carcinoma	NO	YES	FEMALE	WHITE	NOT HISPANIC OR LATINO	[Not Available]	No	L-Lower	[Not Available]	Lung Squamous Cell Carcinoma- Not Otherwise Specified (NOS)	2004	[Not Available]	[Not Available]	R0	[Not Available]	T2	N0	M0	Stage IB	[Not Applicable]	[Not Applicable]	[Not Applicable]	[Not Applicable]	[Not Available]	[Not Available]	[Not Available]	[Not Available]	[Not Available]	[Not Available]	[Not Available]	[Not Available]	[Not Available]	[Not Available]	[Not Available]	[Not Available]	[Not Available]	No	[Not Available]	4	1953	2004	Dead	48	0	[Not Available]	[Not Available]
9b4fa1c2-ac5a-4e23-8d25-28e1446e7d8f	TCGA-21-5783	2012-03-12	Lung Squamous Cell Carcinoma	NO	YES	MALE	WHITE	NOT HISPANIC OR LATINO	[Not Available]	No	L-Upper	Peripheral Lung	Lung Squamous Cell Carcinoma- Not Otherwise Specified (NOS)	2004	[Not Available]	[Not Available]	R0	6th	T2	N0	M0	Stage IB	[Not Applicable]	[Not Applicable]	[Not Applicable]	[Not Applicable]	YES	83	[Not Available]	[Not Available]	[Not Available]	[Not Available]	NO	[Not Available]	[Not Available]	NO	[Not Available]	NO	[Not Available]	No	[Not Available]	3	[Not Available]	1974	Dead	[Not Available]	0	[Not Available]	[Not Available]
4add88b7-169a-448f-b063-c7e6402628f1	TCGA-21-5784	2011-05-02	Lung Squamous Cell Carcinoma	NO	YES	FEMALE	WHITE	NOT HISPANIC OR LATINO	[Not Available]	No	R-Upper	Central Lung	Lung Squamous Cell Carcinoma- Not Otherwise Specified (NOS)	2008	[Not Available]	[Not Available]	R0	6th	T2	N0	M0	Stage IB	[Not Applicable]	[Not Applicable]	[Not Applicable]	[Not Applicable]	YES	80	[Not Available]	74	[Not Available]	69	[Not Available]	[Not Available]	[Not Available]	[Not Available]	[Not Available]	[Not Available]	[Not Available]	No	[Not Available]	3	[Not Available]	1978	Alive	14	[Not Available]	[Not Available]	[Not Available]
9d841e6a-b292-45be-8a7a-50d54606592b	TCGA-21-5786	2011-05-02	Lung Squamous Cell Carcinoma	NO	YES	MALE	WHITE	NOT HISPANIC OR LATINO	[Not Available]	No	R-Upper	Central Lung	Lung Squamous Cell Carcinoma- Not Otherwise Specified (NOS)	2009	[Not Available]	[Not Available]	R0	6th	T2	N0	M0	Stage IB	[Not Applicable]	[Not Applicable]	[Not Applicable]	[Not Applicable]	YES	76	[Not Available]	76	[Not Available]	71	[Not Available]	[Not Available]	[Not Available]	[Not Available]	[Not Available]	[Not Available]	[Not Available]	No	[Not Available]	2	1959	[Not Available]	Alive	75	[Not Available]	[Not Available]	[Not Available]
d11c4976-ba19-4616-be79-d1e321c26d07	TCGA-21-5787	2011-05-03	Lung Squamous Cell Carcinoma	NO	YES	MALE	BLACK OR AFRICAN AMERICAN	NOT HISPANIC OR LATINO	[Not Available]	No	L-Upper	[Not Available]	Lung Squamous Cell Carcinoma- Not Otherwise Specified (NOS)	2009	[Not Available]	[Not Available]	R0	[Not Available]	T2	N2	M0	Stage IIIA	[Not Applicable]	[Not Applicable]	[Not Applicable]	[Not Applicable]	[Not Available]	[Not Available]	[Not Available]	[Not Available]	[Not Available]	[Not Available]	[Not Available]	[Not Available]	[Not Available]	[Not Available]	[Not Available]	[Not Available]	[Not Available]	No	[Not Available]	4	1956	2009	Dead	100	0	[Not Available]	[Not Available]
A7CD7B0F-AB76-4F3F-A2D5-5EC04FE6C4F3	TCGA-21-A5DI	2013-05-10	Lung Squamous Cell Carcinoma	NO	YES	MALE	WHITE	NOT HISPANIC OR LATINO	[Not Available]	Yes, History of Prior Malignancy	R-Lower	[Not Available]	Lung Squamous Cell Carcinoma- Not Otherwise Specified (NOS)	2006	[Not Available]	[Not Available]	R0	6th	T1b	N0	M0	Stage IA	[Not Applicable]	[Not Applicable]	[Not Applicable]	[Not Applicable]	NO	[Not Available]	[Not Available]	[Not Available]	[Not Available]	[Not Available]	[Not Available]	[Not Available]	[Not Available]	[Not Available]	[Not Available]	[Not Available]	[Not Available]	No	[Not Available]	3	[Not Available]	[Not Available]	Alive	[Not Available]	[Not Evaluated]	[Not Evaluated]	[Not Evaluated]
7ddd36fd-9e6a-4a46-a799-82998786cb36	TCGA-22-0940	2010-02-03	Lung Squamous Cell Carcinoma	NO	YES	MALE	WHITE	NOT HISPANIC OR LATINO	[Not Available]	No	L-Lower	Peripheral Lung	Lung Squamous Cell Carcinoma- Not Otherwise Specified (NOS)	2000	[Not Available]	[Not Available]	R0	[Not Available]	T1	N1	M0	Stage IIA	[Not Applicable]	[Not Applicable]	[Not Applicable]	[Not Applicable]	[Not Available]	[Not Available]	[Not Available]	[Not Available]	[Not Available]	[Not Available]	NO	[Not Available]	[Not Available]	NO	[Not Available]	NO	[Not Available]	No	[Not Available]	3	1948	1972	Dead	25	[Not Available]	[Not Available]	[Not Available]
df7c9193-0bd2-4fd9-8ae1-1f9d341e92c5	TCGA-22-0944	2010-02-12	Lung Squamous Cell Carcinoma	NO	YES	MALE	WHITE	NOT HISPANIC OR LATINO	[Not Available]	No	L-Upper	[Not Available]	Lung Squamous Cell Carcinoma- Not Otherwise Specified (NOS)	2000	[Not Available]	[Not Available]	R0	[Not Available]	T2	N0	M0	Stage IB	[Not Applicable]	[Not Applicable]	[Not Applicable]	[Not Applicable]	[Not Available]	[Not Available]	[Not Available]	[Not Available]	[Not Available]	[Not Available]	NO	[Not Available]	[Not Available]	NO	[Not Available]	NO	[Not Available]	No	[Not Available]	2	1970	[Not Available]	Dead	38	[Not Available]	[Not Available]	[Not Available]
972476b7-d7f3-4865-b978-0c13f29457cb	TCGA-22-1000	2010-02-12	Lung Squamous Cell Carcinoma	NO	YES	MALE	WHITE	NOT HISPANIC OR LATINO	[Not Available]	Yes	R-Lower	Central Lung	Lung Squamous Cell Carcinoma- Not Otherwise Specified (NOS)	2000	[Not Available]	[Not Available]	R0	7th	T2	N0	M0	Stage IB	[Not Applicable]	[Not Applicable]	[Not Applicable]	[Not Applicable]	[Not Available]	[Not Available]	[Not Available]	[Not Available]	[Not Available]	[Not Available]	NO	[Not Available]	[Not Available]	NO	[Not Available]	NO	[Not Available]	No	[Not Available]	4	1945	1990	Dead	40	[Not Available]	[Not Available]	[Not Available]
96006f5e-5922-4e55-afa5-5e43773d72f2	TCGA-22-1002	2010-02-12	Lung Squamous Cell Carcinoma	NO	YES	MALE	WHITE	NOT HISPANIC OR LATINO	[Not Available]	No	R-Middle	[Not Available]	Lung Squamous Cell Carcinoma- Not Otherwise Specified (NOS)	2001	[Not Available]	[Not Available]	R0	[Not Available]	T1	N0	M0	Stage IA	[Not Applicable]	[Not Applicable]	[Not Applicable]	[Not Applicable]	[Not Available]	[Not Available]	[Not Available]	[Not Available]	[Not Available]	[Not Available]	NO	[Not Available]	[Not Available]	NO	[Not Available]	NO	[Not Available]	No	[Not Available]	4	1952	2001	Dead	85	[Not Available]	[Not Available]	[Not Available]
3c56a43a-91f1-4a66-9cfe-d2e26b86a936	TCGA-22-1005	2010-02-12	Lung Squamous Cell Carcinoma	YES	NO	MALE	WHITE	NOT HISPANIC OR LATINO	[Not Available]	No	R-Upper	[Not Available]	Lung Squamous Cell Carcinoma- Not Otherwise Specified (NOS)	2001	[Not Available]	[Not Available]	R0	[Not Available]	T1	N0	M0	Stage IA	[Not Applicable]	[Not Applicable]	[Not Applicable]	[Not Applicable]	[Not Available]	[Not Available]	[Not Available]	[Not Available]	[Not Available]	[Not Available]	NO	[Not Available]	[Not Available]	NO	[Not Available]	NO	[Not Available]	No	[Not Available]	4	1952	1997	Dead	40	[Not Available]	[Not Available]	[Not Available]
18058bfb-a008-410f-8e04-7c2b45a856b7	TCGA-22-1011	2010-02-15	Lung Squamous Cell Carcinoma	NO	YES	MALE	WHITE	NOT HISPANIC OR LATINO	[Not Available]	No	R-Upper	[Not Available]	Lung Squamous Cell Carcinoma- Not Otherwise Specified (NOS)	2001	[Not Available]	[Not Available]	R0	[Not Available]	T2	N0	M0	Stage IB	[Not Applicable]	[Not Applicable]	[Not Applicable]	[Not Applicable]	[Not Available]	[Not Available]	[Not Available]	[Not Available]	[Not Available]	[Not Available]	NO	[Not Available]	[Not Available]	NO	[Not Available]	NO	[Not Available]	No	[Not Available]	2	1946	[Not Available]	Dead	83	[Not Available]	[Not Available]	[Not Available]
6ab57144-16ea-4844-b737-e726787d23b9	TCGA-22-1012	2010-02-15	Lung Squamous Cell Carcinoma	NO	YES	FEMALE	WHITE	NOT HISPANIC OR LATINO	[Not Available]	No	R-Lower	[Not Available]	Lung Squamous Cell Carcinoma- Not Otherwise Specified (NOS)	2001	[Not Available]	[Not Available]	R0	[Not Available]	T2	N0	M0	Stage IB	[Not Applicable]	[Not Applicable]	[Not Applicable]	[Not Applicable]	[Not Available]	[Not Available]	[Not Available]	[Not Available]	[Not Available]	[Not Available]	NO	[Not Available]	[Not Available]	NO	[Not Available]	NO	[Not Available]	No	[Not Available]	4	1940	2001	Dead	60	[Not Available]	[Not Available]	[Not Available]
037c57d1-b4a5-45dc-bda4-0550461d321b	TCGA-22-1016	2010-02-15	Lung Squamous Cell Carcinoma	NO	YES	MALE	WHITE	NOT HISPANIC OR LATINO	[Not Available]	No	R-Upper	[Not Available]	Lung Squamous Cell Carcinoma- Not Otherwise Specified (NOS)	2001	[Not Available]	[Not Available]	R0	[Not Available]	T2	N0	M0	Stage IB	[Not Applicable]	[Not Applicable]	[Not Applicable]	[Not Applicable]	[Not Available]	[Not Available]	[Not Available]	[Not Available]	[Not Available]	[Not Available]	NO	[Not Available]	[Not Available]	NO	[Not Available]	NO	[Not Available]	No	[Not Available]	3	1954	1984	Dead	40	[Not Available]	[Not Available]	[Not Available]
25f64b80-0672-4980-9875-956b1699309b	TCGA-22-1017	2011-04-27	Lung Squamous Cell Carcinoma	NO	YES	MALE	WHITE	NOT HISPANIC OR LATINO	[Not Available]	Yes	L-Upper	Central Lung	Lung Squamous Cell Carcinoma- Not Otherwise Specified (NOS)	1999	[Not Available]	[Not Available]	R0	5th	T1	N0	M0	Stage IA	[Not Applicable]	[Not Applicable]	[Not Applicable]	[Not Applicable]	YES	58	75	61	68	60	NO	[Not Available]	[Not Available]	NO	[Not Available]	NO	[Not Available]	Yes	[Not Available]	4	1959	1999	Dead	[Not Available]	0	[Not Available]	[Not Available]
211bb982-16f4-4f07-b24f-e633703f24c4	TCGA-22-4591	2011-01-04	Lung Squamous Cell Carcinoma	NO	YES	MALE	WHITE	[Not Available]	[Not Available]	No	R-Lower	Peripheral Lung	Lung Squamous Cell Carcinoma- Not Otherwise Specified (NOS)	2001	[Not Available]	[Not Available]	R0	[Not Available]	T3	N2	M0	Stage IIIA	[Not Applicable]	[Not Applicable]	[Not Applicable]	[Not Applicable]	[Not Available]	[Not Available]	[Not Available]	[Not Available]	[Not Available]	[Not Available]	NO	[Not Available]	[Not Available]	NO	[Not Available]	NO	[Not Available]	No	[Not Available]	2	1933	[Not Available]	Dead	[Not Available]	0	[Not Available]	[Not Available]
8fbe1f9e-f2a6-4550-aabf-b06607b821f0	TCGA-22-4593	2011-08-05	Lung Squamous Cell Carcinoma	NO	YES	MALE	WHITE	[Not Available]	[Not Available]	No	R-Lower	Central Lung	Lung Squamous Cell Carcinoma- Not Otherwise Specified (NOS)	2002	[Not Available]	[Not Available]	R0	7th	T2b	N0	M0	Stage IIA	[Not Applicable]	[Not Applicable]	[Not Applicable]	[Not Applicable]	[Not Available]	[Not Available]	[Not Available]	[Not Available]	[Not Available]	[Not Available]	NO	[Not Available]	[Not Available]	NO	[Not Available]	NO	[Not Available]	No	[Not Available]	4	1942	2002	Dead	30	0	[Not Available]	[Not Available]
986ced10-52b9-43b4-84ad-96013a657f1b	TCGA-22-4594	2011-01-05	Lung Squamous Cell Carcinoma	NO	YES	FEMALE	[Not Available]	[Not Available]	[Not Available]	No	L-Upper	Peripheral Lung	Lung Squamous Cell Carcinoma- Not Otherwise Specified (NOS)	2002	[Not Available]	[Not Available]	R0	[Not Available]	T3	N2	M0	Stage IIIA	[Not Applicable]	[Not Applicable]	[Not Applicable]	[Not Applicable]	[Not Available]	[Not Available]	[Not Available]	[Not Available]	[Not Available]	[Not Available]	NO	[Not Available]	[Not Available]	NO	[Not Available]	NO	[Not Available]	No	[Not Available]	4	[Not Available]	[Not Available]	Dead	40	0	[Not Available]	[Not Available]
aa53c701-4b65-4c26-a6f0-02a4498717a8	TCGA-22-4595	2011-01-05	Lung Squamous Cell Carcinoma	NO	YES	MALE	WHITE	[Not Available]	[Not Available]	No	L-Lower	[Not Available]	Lung Squamous Cell Carcinoma- Not Otherwise Specified (NOS)	2002	[Not Available]	[Not Available]	R0	[Not Available]	T3	N2	[Not Available]	Stage IIIA	[Not Applicable]	[Not Applicable]	[Not Applicable]	[Not Applicable]	[Not Available]	[Not Available]	[Not Available]	[Not Available]	[Not Available]	[Not Available]	NO	[Not Available]	[Not Available]	NO	[Not Available]	NO	[Not Available]	No	[Not Available]	2	[Not Available]	[Not Available]	Dead	37	0	1	Other
d4608593-20cb-4b53-b037-39aa8ddd05b7	TCGA-22-4596	2011-01-05	Lung Squamous Cell Carcinoma	NO	YES	FEMALE	WHITE	[Not Available]	[Not Available]	No	L-Upper	[Not Available]	Lung Squamous Cell Carcinoma- Not Otherwise Specified (NOS)	2002	[Not Available]	[Not Available]	R0	[Not Available]	T1b	N0	M0	Stage IB	[Not Applicable]	[Not Applicable]	[Not Applicable]	[Not Applicable]	[Not Available]	[Not Available]	[Not Available]	[Not Available]	[Not Available]	[Not Available]	NO	[Not Available]	[Not Available]	NO	[Not Available]	NO	[Not Available]	No	[Not Available]	4	1962	2002	Dead	40	0	[Not Available]	[Not Available]
e5e4ead7-f2d8-4d72-aedc-393ee002a081	TCGA-22-4599	2010-11-30	Lung Squamous Cell Carcinoma	NO	YES	FEMALE	WHITE	[Not Available]	[Not Available]	No	[Not Available]	Central Lung	Lung Squamous Cell Carcinoma- Not Otherwise Specified (NOS)	2002	[Not Available]	[Not Available]	R0	[Not Available]	T2a	N0	M0	Stage IB	[Not Applicable]	[Not Applicable]	[Not Applicable]	[Not Applicable]	[Not Available]	[Not Available]	[Not Available]	[Not Available]	[Not Available]	[Not Available]	NO	[Not Available]	[Not Available]	NO	[Not Available]	NO	[Not Available]	No	[Not Available]	2	[Not Available]	[Not Available]	Dead	25	0	[Not Available]	[Not Available]
5f99343b-e8ea-4b41-b36d-cd5c8fd918d0	TCGA-22-4601	2011-02-10	Lung Squamous Cell Carcinoma	NO	YES	FEMALE	WHITE	[Not Available]	[Not Available]	No	R-Upper	[Not Available]	Lung Squamous Cell Carcinoma- Not Otherwise Specified (NOS)	2003	[Not Available]	[Not Available]	R0	[Not Available]	T4	N0	M0	Stage IIIA	[Not Applicable]	[Not Applicable]	[Not Applicable]	[Not Applicable]	[Not Available]	[Not Available]	[Not Available]	[Not Available]	[Not Available]	[Not Available]	NO	[Not Available]	[Not Available]	NO	[Not Available]	NO	[Not Available]	No	[Not Available]	2	[Not Available]	[Not Available]	Dead	60	0	[Not Available]	[Not Available]
0c80ab20-7e33-4f1d-b136-07782b68e98b	TCGA-22-4604	2011-02-10	Lung Squamous Cell Carcinoma	NO	YES	MALE	WHITE	[Not Available]	[Not Available]	No	L-Upper	Central Lung	Lung Squamous Cell Carcinoma- Not Otherwise Specified (NOS)	2003	[Not Available]	[Not Available]	R0	[Not Available]	T2a	N1	M0	Stage IIA	[Not Applicable]	[Not Applicable]	[Not Applicable]	[Not Applicable]	[Not Available]	[Not Available]	[Not Available]	[Not Available]	[Not Available]	[Not Available]	NO	[Not Available]	[Not Available]	NO	[Not Available]	NO	[Not Available]	No	[Not Available]	2	[Not Available]	[Not Available]	Dead	50	0	0	Other
28346e70-c18b-4572-922f-c7b7fa8af40d	TCGA-22-4605	2012-01-16	Lung Squamous Cell Carcinoma	NO	YES	FEMALE	[Not Available]	[Not Available]	[Not Available]	No	R-Upper	[Not Available]	Lung Squamous Cell Carcinoma- Not Otherwise Specified (NOS)	2003	[Not Available]	[Not Available]	R0	6th	T2	N0	M0	Stage IB	[Not Applicable]	[Not Applicable]	[Not Applicable]	[Not Applicable]	YES	80	81	[Not Available]	[Not Available]	58	NO	[Not Available]	[Not Available]	NO	[Not Available]	NO	[Not Available]	No	[Not Available]	4	1946	1996	Dead	75	[Not Available]	[Not Available]	[Not Available]
2e7cd434-0440-47a2-bc59-8805b8324ec4	TCGA-22-4607	2011-02-10	Lung Squamous Cell Carcinoma	NO	YES	MALE	WHITE	[Not Available]	[Not Available]	No	R-Lower	Peripheral Lung	Lung Squamous Cell Carcinoma- Not Otherwise Specified (NOS)	2003	[Not Available]	[Not Available]	R0	[Not Available]	T2a	N0	M0	Stage IB	[Not Applicable]	[Not Applicable]	[Not Applicable]	[Not Applicable]	[Not Available]	[Not Available]	[Not Available]	[Not Available]	[Not Available]	[Not Available]	NO	[Not Available]	[Not Available]	NO	[Not Available]	NO	[Not Available]	No	[Not Available]	3	1948	1968	Dead	20	[Not Available]	3	Other
47cbb242-a356-43ba-95c3-0b0c9ef90fbf	TCGA-22-4609	2012-01-16	Lung Squamous Cell Carcinoma	NO	YES	MALE	WHITE	[Not Available]	[Not Available]	No	R-Upper	[Not Available]	Lung Squamous Cell Carcinoma- Not Otherwise Specified (NOS)	2003	[Not Available]	[Not Available]	R0	6th	T1	N0	M0	Stage IA	[Not Applicable]	[Not Applicable]	[Not Applicable]	[Not Applicable]	YES	58	81	[Not Available]	[Not Available]	58	NO	[Not Available]	[Not Available]	NO	[Not Available]	NO	[Not Available]	No	[Not Available]	2	[Not Available]	[Not Available]	Dead	77	[Not Available]	[Not Available]	[Not Available]
2c8877f9-ee7f-4216-97ad-d2939a13daa4	TCGA-22-4613	2011-02-10	Lung Squamous Cell Carcinoma	NO	YES	FEMALE	WHITE	[Not Available]	[Not Available]	No	L-Upper	[Not Available]	Lung Squamous Cell Carcinoma- Not Otherwise Specified (NOS)	2004	[Not Available]	[Not Available]	R0	[Not Available]	T1b	N0	M0	Stage IA	[Not Applicable]	[Not Applicable]	[Not Applicable]	[Not Applicable]	[Not Available]	[Not Available]	[Not Available]	[Not Available]	[Not Available]	[Not Available]	NO	[Not Available]	[Not Available]	NO	[Not Available]	NO	[Not Available]	No	[Not Available]	3	1958	1988	Dead	30	0	[Not Available]	[Not Available]
bece6b8e-5d6c-4dd6-85a3-9b3a9c670aa7	TCGA-22-5471	2011-05-05	Lung Squamous Cell Carcinoma	NO	YES	MALE	WHITE	[Not Available]	[Not Available]	Yes	L-Lower	[Not Available]	Lung Squamous Cell Carcinoma- Not Otherwise Specified (NOS)	2005	[Not Available]	[Not Available]	R2	6th	T2	N0	M0	Stage IB	[Not Applicable]	[Not Applicable]	[Not Applicable]	[Not Applicable]	[Not Available]	[Not Available]	[Not Available]	[Not Available]	[Not Available]	[Not Available]	NO	[Not Available]	[Not Available]	NO	[Not Available]	NO	[Not Available]	No	[Not Available]	4	[Not Available]	2005	Alive	50	[Not Available]	1	Pre-Adjuvant Therapy
bd3bf142-7c14-4538-8a76-3c6e140fa01a	TCGA-22-5472	2011-04-29	Lung Squamous Cell Carcinoma	NO	YES	MALE	WHITE	NOT HISPANIC OR LATINO	[Not Available]	Yes	R-Lower	[Not Available]	Lung Squamous Cell Carcinoma- Not Otherwise Specified (NOS)	2005	[Not Available]	[Not Available]	R0	[Not Available]	T2a	N0	M0	Stage IB	[Not Applicable]	[Not Applicable]	[Not Applicable]	[Not Applicable]	[Not Available]	[Not Available]	[Not Available]	[Not Available]	[Not Available]	[Not Available]	NO	[Not Available]	[Not Available]	NO	[Not Available]	NO	[Not Available]	No	[Not Available]	4	1964	1999	Dead	35	0	[Not Available]	[Not Available]
eea9575a-c842-4a95-9e47-3a3b12533f25	TCGA-22-5473	2011-04-29	Lung Squamous Cell Carcinoma	NO	YES	MALE	WHITE	NOT HISPANIC OR LATINO	[Not Available]	No	[Discrepancy]	[Not Available]	Lung Squamous Cell Carcinoma- Not Otherwise Specified (NOS)	2005	[Not Available]	[Not Available]	R0	[Not Available]	T3	N0	M0	[Discrepancy]	[Not Applicable]	[Not Applicable]	[Not Applicable]	[Not Applicable]	[Not Available]	[Not Available]	[Not Available]	[Not Available]	[Not Available]	[Not Available]	NO	[Not Available]	[Not Available]	NO	[Not Available]	NO	[Not Available]	No	[Not Available]	3	1942	1987	Dead	45	0	[Not Available]	[Not Available]
9101d953-1eb6-4808-aa44-a7b04e0ef412	TCGA-22-5474	2011-05-04	Lung Squamous Cell Carcinoma	NO	YES	MALE	WHITE	[Not Available]	[Not Available]	No	L-Upper	[Not Available]	Lung Squamous Cell Carcinoma- Not Otherwise Specified (NOS)	2005	[Not Available]	[Not Available]	R0	[Not Available]	T2a	N0	M0	Stage IB	[Not Applicable]	[Not Applicable]	[Not Applicable]	[Not Applicable]	[Not Available]	[Not Available]	[Not Available]	[Not Available]	[Not Available]	[Not Available]	NO	[Not Available]	[Not Available]	NO	[Not Available]	NO	[Not Available]	No	[Not Available]	4	1944	1994	Dead	50	0	[Not Available]	[Not Available]
bd15f523-45c4-4d7c-a3cc-4fb56abb0e54	TCGA-22-5477	2011-05-02	Lung Squamous Cell Carcinoma	NO	YES	MALE	WHITE	[Not Available]	[Not Available]	No	R-Lower	[Not Available]	Lung Squamous Cell Carcinoma- Not Otherwise Specified (NOS)	2004	[Not Available]	[Not Available]	R0	[Not Available]	T1	N0	M0	Stage IA	[Not Applicable]	[Not Applicable]	[Not Applicable]	[Not Applicable]	[Not Available]	[Not Available]	[Not Available]	[Not Available]	[Not Available]	[Not Available]	NO	[Not Available]	[Not Available]	NO	[Not Available]	NO	[Not Available]	No	[Not Available]	2	[Not Available]	[Not Available]	Dead	100	0	[Not Available]	[Not Available]
4daf4a91-bc36-40c8-8fca-ea61b6706775	TCGA-22-5478	2011-05-05	Lung Squamous Cell Carcinoma	NO	YES	MALE	[Not Available]	[Not Available]	[Not Available]	No	R-Lower	Peripheral Lung	Lung Squamous Cell Carcinoma- Not Otherwise Specified (NOS)	2004	[Not Available]	[Not Available]	R0	[Not Available]	T2a	N0	M0	Stage IB	[Not Applicable]	[Not Applicable]	[Not Applicable]	[Not Applicable]	[Not Available]	[Not Available]	[Not Available]	[Not Available]	[Not Available]	[Not Available]	NO	[Not Available]	[Not Available]	NO	[Not Available]	NO	[Not Available]	No	[Not Available]	4	[Not Available]	1994	Dead	[Not Available]	0	[Not Available]	[Not Available]
fadd20a1-90ca-4d99-a128-9730d02a7bd6	TCGA-22-5479	2011-10-27	Lung Squamous Cell Carcinoma	NO	YES	MALE	WHITE	[Not Available]	[Not Available]	No	L-Lower	Peripheral Lung	Lung Squamous Cell Carcinoma- Not Otherwise Specified (NOS)	2004	[Not Available]	[Not Available]	R0	6th	T2	N0	M0	Stage IB	[Not Applicable]	[Not Applicable]	[Not Applicable]	[Not Applicable]	[Not Available]	[Not Available]	[Not Available]	[Not Available]	[Not Available]	[Not Available]	NO	[Not Available]	[Not Available]	NO	[Not Available]	NO	[Not Available]	No	[Not Available]	4	1966	2001	Alive	35	[Not Available]	1	Pre-Adjuvant Therapy
396932ab-c4b3-4526-9201-9222f5f062a5	TCGA-22-5480	2011-05-06	Lung Squamous Cell Carcinoma	NO	YES	FEMALE	WHITE	NOT HISPANIC OR LATINO	[Not Available]	No	L-Upper	Central Lung	Lung Squamous Cell Carcinoma- Not Otherwise Specified (NOS)	2002	[Not Available]	[Not Available]	R0	[Not Available]	T1b	N0	M0	Stage IA	[Not Applicable]	[Not Applicable]	[Not Applicable]	[Not Applicable]	[Not Available]	[Not Available]	[Not Available]	[Not Available]	[Not Available]	[Not Available]	NO	[Not Available]	[Not Available]	NO	[Not Available]	NO	[Not Available]	No	[Not Available]	4	1952	2002	Dead	50	0	[Not Available]	[Not Available]
b80ea411-c8ca-4414-ad1b-82af11df11c2	TCGA-22-5481	2011-10-27	Lung Squamous Cell Carcinoma	NO	YES	FEMALE	WHITE	[Not Available]	[Not Available]	No	L-Lower	[Not Available]	Lung Squamous Cell Carcinoma- Not Otherwise Specified (NOS)	2002	[Not Available]	[Not Available]	R0	5th	T2	N1	M0	Stage IIB	[Not Applicable]	[Not Applicable]	[Not Applicable]	[Not Applicable]	[Not Available]	[Not Available]	[Not Available]	[Not Available]	[Not Available]	[Not Available]	NO	[Not Available]	[Not Available]	NO	[Not Available]	NO	[Not Available]	No	[Not Available]	4	1952	2002	Dead	75	[Not Available]	[Not Available]	[Not Available]
dd5e3a1e-2adf-4eee-ac6b-c6efad97724a	TCGA-22-5482	2011-05-06	Lung Squamous Cell Carcinoma	NO	YES	MALE	WHITE	[Not Available]	[Not Available]	No	L-Upper	[Not Available]	Lung Squamous Cell Carcinoma- Not Otherwise Specified (NOS)	2005	[Not Available]	[Not Available]	R0	[Not Available]	T2a	N0	M0	Stage IB	[Not Applicable]	[Not Applicable]	[Not Applicable]	[Not Applicable]	[Not Available]	[Not Available]	[Not Available]	[Not Available]	[Not Available]	[Not Available]	NO	[Not Available]	[Not Available]	NO	[Not Available]	NO	[Not Available]	No	[Not Available]	4	1944	2004	Dead	60	0	[Not Available]	[Not Available]
b162b3bf-8097-4466-b08f-6434f541038f	TCGA-22-5483	2011-05-10	Lung Squamous Cell Carcinoma	NO	YES	MALE	WHITE	[Not Available]	[Not Available]	No	R-Upper	[Not Available]	Lung Squamous Cell Carcinoma- Not Otherwise Specified (NOS)	2005	[Not Available]	[Not Available]	R0	[Not Available]	T1a	N1	M0	Stage IIA	[Not Applicable]	[Not Applicable]	[Not Applicable]	[Not Applicable]	[Not Available]	[Not Available]	[Not Available]	[Not Available]	[Not Available]	[Not Available]	NO	[Not Available]	[Not Available]	NO	[Not Available]	NO	[Not Available]	No	[Not Available]	4	[Not Available]	2004	Dead	50	0	[Not Available]	[Not Available]
305f72a8-069b-410b-bbe4-4ecb761c748d	TCGA-22-5485	2011-05-10	Lung Squamous Cell Carcinoma	NO	YES	FEMALE	WHITE	[Not Available]	[Not Available]	No	R-Upper	[Not Available]	Lung Squamous Cell Carcinoma- Not Otherwise Specified (NOS)	2001	[Not Available]	[Not Available]	R0	[Not Available]	T1a	N0	M0	Stage IA	[Not Applicable]	[Not Applicable]	[Not Applicable]	[Not Applicable]	[Not Available]	[Not Available]	[Not Available]	[Not Available]	[Not Available]	[Not Available]	NO	[Not Available]	[Not Available]	NO	[Not Available]	NO	[Not Available]	No	[Not Available]	2	[Not Available]	[Not Available]	Dead	60	0	[Not Available]	[Not Available]
df6a7005-92ed-4701-bd59-7b5f09715f9d	TCGA-22-5489	2011-05-11	Lung Squamous Cell Carcinoma	NO	YES	MALE	WHITE	[Not Available]	[Not Available]	No	L-Upper	[Not Available]	Lung Squamous Cell Carcinoma- Not Otherwise Specified (NOS)	2003	[Not Available]	[Not Available]	R0	[Not Available]	T1b	N0	M0	Stage IA	[Not Applicable]	[Not Applicable]	[Not Applicable]	[Not Applicable]	[Not Available]	[Not Available]	[Not Available]	[Not Available]	[Not Available]	[Not Available]	NO	[Not Available]	[Not Available]	NO	[Not Available]	NO	[Not Available]	No	[Not Available]	4	[Not Available]	2003	Dead	70	0	1	Other
4cdeafe4-a6db-498f-a019-6e3a9dc35b2f	TCGA-22-5491	2011-05-11	Lung Squamous Cell Carcinoma	NO	YES	MALE	WHITE	[Not Available]	[Not Available]	No	L-Lower	[Not Available]	Lung Squamous Cell Carcinoma- Not Otherwise Specified (NOS)	2003	[Not Available]	[Not Available]	R0	[Not Available]	T1a	N0	M0	Stage IA	[Not Applicable]	[Not Applicable]	[Not Applicable]	[Not Applicable]	[Not Available]	[Not Available]	[Not Available]	[Not Available]	[Not Available]	[Not Available]	NO	[Not Available]	[Not Available]	NO	[Not Available]	NO	[Not Available]	No	[Not Available]	2	[Not Available]	[Not Available]	Dead	57	0	[Not Available]	[Not Available]
422a46b2-a67c-4a7e-923f-9b651ced96f8	TCGA-22-5492	2011-05-11	Lung Squamous Cell Carcinoma	NO	YES	FEMALE	[Not Available]	[Not Available]	[Not Available]	No	L-Upper	[Not Available]	Lung Squamous Cell Carcinoma- Not Otherwise Specified (NOS)	2003	[Not Available]	[Not Available]	R0	[Not Available]	T2a	N2	M0	Stage IIIA	[Not Applicable]	[Not Applicable]	[Not Applicable]	[Not Applicable]	[Not Available]	[Not Available]	[Not Available]	[Not Available]	[Not Available]	[Not Available]	NO	[Not Available]	[Not Available]	NO	[Not Available]	NO	[Not Available]	No	[Not Available]	4	1953	2003	Dead	50	0	[Not Available]	[Not Available]
7224CB42-6799-405F-819D-D45B1CEF075E	TCGA-22-A5C4	2013-05-08	Lung Squamous Cell Carcinoma	NO	YES	MALE	WHITE	NOT HISPANIC OR LATINO	[Not Available]	Yes, History of Prior Malignancy	R-Lower	Central Lung	Lung Squamous Cell Carcinoma- Not Otherwise Specified (NOS)	2012	[Not Available]	[Not Available]	R0	7th	T2b	N0	M0	Stage IIA	[Not Applicable]	[Not Applicable]	[Not Applicable]	[Not Applicable]	YES	73	82	[Not Available]	[Not Available]	74	NO	[Not Available]	[Not Available]	NO	[Not Available]	NO	[Not Available]	No	[Not Available]	4	1960	2012	Alive	80	[Not Evaluated]	1	Pre-Adjuvant Therapy
6ee6ca0a-8702-480d-b2d1-9224e7dd9211	TCGA-33-4532	2011-02-03	Lung Squamous Cell Carcinoma	NO	YES	MALE	WHITE	NOT HISPANIC OR LATINO	[Not Available]	Yes	R-Lower	[Not Available]	Lung Squamous Cell Carcinoma- Not Otherwise Specified (NOS)	2001	[Not Available]	[Not Available]	R0	5th	T2	N0	M0	Stage IB	[Not Applicable]	[Not Applicable]	[Not Applicable]	[Not Applicable]	YES	3	3	78	76	27	[Not Available]	[Not Available]	[Not Available]	[Not Available]	[Not Available]	[Not Available]	[Not Available]	No	[Not Available]	2	[Not Available]	[Not Available]	Alive	53	[Not Available]	1	[Not Available]
b4ff0f49-b787-48ec-91cc-ee26786ff1bf	TCGA-33-4533	2011-02-03	Lung Squamous Cell Carcinoma	NO	YES	FEMALE	BLACK OR AFRICAN AMERICAN	NOT HISPANIC OR LATINO	[Not Available]	Yes	L-Upper	[Not Available]	Lung Squamous Cell Carcinoma- Not Otherwise Specified (NOS)	2001	[Not Available]	[Not Available]	R0	5th	T2	N0	M0	Stage IB	[Not Applicable]	[Not Applicable]	[Not Applicable]	[Not Applicable]	YES	1	1	63	63	11	[Not Available]	[Not Available]	[Not Available]	[Not Available]	[Not Available]	[Not Available]	[Not Available]	No	[Not Available]	4	1940	1990	Alive	50	[Not Available]	2	[Not Available]
c70a5975-c37b-47cc-9113-427a754807d8	TCGA-33-4538	2011-02-03	Lung Squamous Cell Carcinoma	NO	YES	MALE	WHITE	HISPANIC OR LATINO	[Not Available]	No	L-Upper	[Not Available]	Lung Squamous Cell Carcinoma- Not Otherwise Specified (NOS)	2002	[Not Available]	[Not Available]	RX	6th	T2	N2	M0	Stage IIIA	[Not Applicable]	[Not Applicable]	[Not Applicable]	[Not Applicable]	YES	2	[Not Available]	3	[Not Available]	20	[Not Available]	[Not Available]	[Not Available]	[Not Available]	[Not Available]	[Not Available]	[Not Available]	Yes	[Not Available]	2	[Not Available]	[Not Available]	Dead	51	[Not Available]	2	Pre-Adjuvant Therapy
44b1d457-3a50-404e-b54c-ca619262bc2f	TCGA-33-4547	2011-02-03	Lung Squamous Cell Carcinoma	NO	YES	MALE	WHITE	NOT HISPANIC OR LATINO	[Not Available]	No	R-Upper	[Not Available]	Lung Squamous Cell Carcinoma- Not Otherwise Specified (NOS)	2007	[Not Available]	[Not Available]	R0	6th	T2	N0	M0	Stage IB	[Not Applicable]	[Not Applicable]	[Not Applicable]	[Not Applicable]	YES	62	[Not Available]	[Not Available]	[Not Available]	[Not Available]	NO	[Not Available]	[Not Available]	[Not Available]	[Not Available]	[Not Available]	[Not Available]	No	[Not Available]	3	1950	1970	Alive	40	[Not Available]	2	Other
fad202a4-11f2-467c-8311-aca60cecf16b	TCGA-33-4566	2011-02-03	Lung Squamous Cell Carcinoma	NO	YES	MALE	WHITE	NOT HISPANIC OR LATINO	[Not Available]	No	R-Upper	[Not Available]	Lung Squamous Cell Carcinoma- Not Otherwise Specified (NOS)	1996	[Not Available]	[Not Available]	R0	4th	T2	N0	M0	Stage IB	[Not Applicable]	[Not Applicable]	[Not Applicable]	[Not Applicable]	YES	4	[Not Available]	77	[Not Available]	23	[Not Available]	[Not Available]	[Not Available]	[Not Available]	[Not Available]	[Not Available]	[Not Available]	No	[Not Available]	2	[Not Available]	[Not Available]	Dead	20	[Not Available]	1	Other
0d3c11b5-856e-4d41-b94a-b2e32f9c5792	TCGA-33-4582	2011-02-03	Lung Squamous Cell Carcinoma	[Not Available]	[Not Available]	MALE	WHITE	NOT HISPANIC OR LATINO	[Not Available]	No	L-Lower	[Not Available]	Lung Squamous Cell Carcinoma- Not Otherwise Specified (NOS)	2000	[Not Available]	[Not Available]	R0	5th	T1	N0	M0	Stage IA	[Not Applicable]	[Not Applicable]	[Not Applicable]	[Not Applicable]	YES	1	[Not Available]	[Not Available]	37	25	[Not Available]	[Not Available]	[Not Available]	[Not Available]	[Not Available]	[Not Available]	[Not Available]	No	[Not Available]	2	1966	[Not Available]	Dead	86	[Not Available]	1	Other
f728a4d9-53d4-43a5-abc1-4016d388efa8	TCGA-33-4583	2011-02-03	Lung Squamous Cell Carcinoma	[Not Available]	[Not Available]	MALE	WHITE	NOT HISPANIC OR LATINO	[Not Available]	No	L-Lower	[Not Available]	Lung Squamous Cell Carcinoma- Not Otherwise Specified (NOS)	1999	[Not Available]	[Not Available]	R0	5th	T1	N0	M0	Stage IA	[Not Applicable]	[Not Applicable]	[Not Applicable]	[Not Applicable]	YES	3	[Not Available]	73	[Not Available]	29	[Not Available]	[Not Available]	[Not Available]	[Not Available]	[Not Available]	[Not Available]	[Not Available]	No	[Not Available]	4	1941	1987	Alive	46	[Not Available]	1	Other
376dfd27-68e8-4a1a-9c4f-5064279b2a9e	TCGA-33-4586	2011-02-03	Lung Squamous Cell Carcinoma	[Not Available]	[Not Available]	MALE	WHITE	NOT HISPANIC OR LATINO	[Not Available]	No	L-Lower	[Not Available]	Lung Squamous Cell Carcinoma- Not Otherwise Specified (NOS)	2007	[Not Available]	[Not Available]	[Not Available]	6th	T2	N2	M0	Stage IIIA	[Not Applicable]	[Not Applicable]	[Not Applicable]	[Not Applicable]	YES	2	2	70	69	37	[Not Available]	[Not Available]	[Not Available]	[Not Available]	[Not Available]	[Not Available]	[Not Available]	No	[Not Available]	4	1961	2004	Dead	108	[Not Available]	1	Other
46cc3a2b-91c9-4a74-8989-992585634b87	TCGA-33-4587	2012-03-02	Lung Squamous Cell Carcinoma	NO	YES	FEMALE	WHITE	NOT HISPANIC OR LATINO	[Not Available]	No	R-Middle	[Not Available]	Lung Small Cell Squamous Cell Carcinoma	2003	[Not Available]	[Not Available]	R0	6th	T2	N0	MX	Stage IB	[Not Applicable]	[Not Applicable]	[Not Applicable]	[Not Applicable]	YES	75	73	76	91	111	NO	[Not Available]	[Not Available]	[Not Available]	[Not Available]	[Not Available]	[Not Available]	No	[Not Available]	4	1970	2003	Dead	[Not Available]	[Not Available]	[Not Available]	[Not Available]
49f975ea-a1cf-4a9b-bf13-030c68cc99e4	TCGA-33-4589	2011-02-03	Lung Squamous Cell Carcinoma	[Not Available]	[Not Available]	FEMALE	WHITE	HISPANIC OR LATINO	[Not Available]	Yes	R-Lower	[Not Available]	Lung Squamous Cell Carcinoma- Not Otherwise Specified (NOS)	1992	[Not Available]	[Not Available]	[Not Available]	3rd	T2	N1	M0	Stage IIB	[Not Applicable]	[Not Applicable]	[Not Applicable]	[Not Applicable]	NO	[Not Available]	[Not Available]	[Not Available]	[Not Available]	[Not Available]	[Not Available]	[Not Available]	[Not Available]	[Not Available]	[Not Available]	[Not Available]	[Not Available]	No	[Not Available]	2	1948	[Not Available]	Dead	45	80	1	Preoperative
afedf3fb-fc77-45a7-bdcd-2c78706a0f8a	TCGA-33-6737	2011-09-23	Lung Squamous Cell Carcinoma	NO	YES	MALE	WHITE	[Not Available]	[Not Available]	Yes	R-Upper	[Not Available]	Lung Squamous Cell Carcinoma- Not Otherwise Specified (NOS)	2008	[Not Available]	[Not Available]	[Not Available]	6th	T2	N2	M0	Stage IIIA	[Not Applicable]	[Not Applicable]	[Not Applicable]	[Not Applicable]	[Not Available]	[Not Available]	[Not Available]	[Not Available]	[Not Available]	[Not Available]	[Not Available]	[Not Available]	[Not Available]	[Not Available]	[Not Available]	[Not Available]	[Not Available]	No	[Not Available]	4	[Not Available]	[Not Available]	Dead	20	[Not Available]	[Not Available]	[Not Available]
cb6065de-0fc2-40e6-9609-179dfc54943f	TCGA-33-6738	2011-08-11	Lung Squamous Cell Carcinoma	NO	YES	MALE	WHITE	[Not Available]	[Not Available]	No	L-Upper	[Not Available]	Lung Squamous Cell Carcinoma- Not Otherwise Specified (NOS)	2009	[Not Available]	[Not Available]	[Not Available]	6th	T1	N2	MX	Stage IIIA	[Not Applicable]	[Not Applicable]	[Not Applicable]	[Not Applicable]	NO	[Not Available]	[Not Available]	[Not Available]	[Not Available]	[Not Available]	[Not Available]	[Not Available]	[Not Available]	[Not Available]	[Not Available]	[Not Available]	[Not Available]	No	[Not Available]	4	[Not Available]	[Not Available]	Alive	50	[Not Available]	[Not Available]	[Not Available]
7FA49ECB-74A2-42CB-9BC9-1CBBFDDE0D28	TCGA-33-A4WN	2014-04-24	Lung Squamous Cell Carcinoma	YES	NO	MALE	WHITE	NOT HISPANIC OR LATINO	[Not Available]	No	R-Upper	[Not Available]	Lung Squamous Cell Carcinoma- Not Otherwise Specified (NOS)	2011	[Not Available]	[Not Available]	R0	7th	T2a	N0	MX	Stage IB	[Not Applicable]	[Not Applicable]	[Not Applicable]	[Not Applicable]	NO	[Not Available]	[Not Available]	[Not Available]	[Not Available]	[Not Available]	[Not Available]	[Not Available]	[Not Available]	[Not Available]	[Not Available]	[Not Available]	[Not Available]	No	[Not Available]	2	1970	[Not Available]	Dead	60	90	1	Preoperative
8D32BEA5-51EF-4AB0-83AE-1DE31E7D4B43	TCGA-33-A5GW	2014-04-24	Lung Squamous Cell Carcinoma	YES	NO	MALE	WHITE	NOT HISPANIC OR LATINO	[Not Available]	No	R-Lower	[Not Available]	Lung Squamous Cell Carcinoma- Not Otherwise Specified (NOS)	2012	[Not Available]	[Not Available]	R0	7th	T1a	N1	MX	Stage IIA	[Not Applicable]	[Not Applicable]	[Not Applicable]	[Not Applicable]	YES	84.9	[Not Available]	90.9	[Not Available]	[Not Available]	[Not Available]	[Not Available]	[Not Available]	[Not Available]	[Not Available]	[Not Available]	[Not Available]	No	[Not Available]	4	[Not Available]	2008	Alive	50	90	1	Preoperative
A57414A5-FCDB-47B5-B07E-EDC7DC460783	TCGA-33-AAS8	2014-06-13	Lung Squamous Cell Carcinoma	NO	YES	FEMALE	BLACK OR AFRICAN AMERICAN	NOT HISPANIC OR LATINO	[Not Available]	No	R-Upper	[Not Available]	Lung Squamous Cell Carcinoma- Not Otherwise Specified (NOS)	1998	[Not Available]	[Not Available]	R0	5th	T1	N0	MX	Stage IA	[Not Applicable]	[Not Applicable]	[Not Applicable]	[Not Applicable]	NO	[Not Available]	[Not Available]	[Not Available]	[Not Available]	[Not Available]	[Not Available]	[Not Available]	[Not Available]	[Not Available]	[Not Available]	[Not Available]	[Not Available]	No	[Not Available]	4	1971	1991	Dead	60	90	1	Preoperative
26556020-3DAF-4B8B-A3DE-C0532C96ACA0	TCGA-33-AASB	2014-06-13	Lung Squamous Cell Carcinoma	NO	YES	MALE	BLACK OR AFRICAN AMERICAN	NOT HISPANIC OR LATINO	[Not Available]	No	L-Upper	[Not Available]	Lung Squamous Cell Carcinoma- Not Otherwise Specified (NOS)	2002	[Not Available]	[Not Available]	R0	5th	T2	N0	MX	Stage IB	[Not Applicable]	[Not Applicable]	[Not Applicable]	[Not Applicable]	YES	107.2	103.1	64.6	62.1	84.6	[Not Available]	[Not Available]	[Not Available]	[Not Available]	[Not Available]	[Not Available]	[Not Available]	No	[Not Available]	2	1962	[Not Available]	Dead	40	90	1	Preoperative
EF6116CE-AE38-488C-B3CC-0E88BA0F1876	TCGA-33-AASD	2014-06-13	Lung Squamous Cell Carcinoma	NO	YES	MALE	BLACK OR AFRICAN AMERICAN	NOT HISPANIC OR LATINO	[Not Available]	No	R-Lower	[Not Available]	Lung Squamous Cell Carcinoma- Not Otherwise Specified (NOS)	2001	[Not Available]	[Not Available]	R0	5th	T1	N0	MX	Stage IA	[Not Applicable]	[Not Applicable]	[Not Applicable]	[Not Applicable]	YES	95.3	82.4	77.4	66.9	38.1	[Not Available]	[Not Available]	[Not Available]	[Not Available]	[Not Available]	[Not Available]	[Not Available]	No	[Not Available]	2	1950	[Not Available]	Dead	84	80	1	Preoperative
55BAFAAD-323B-4B92-813E-52D18D70FC3E	TCGA-33-AASI	2014-06-13	Lung Squamous Cell Carcinoma	NO	YES	FEMALE	BLACK OR AFRICAN AMERICAN	NOT HISPANIC OR LATINO	[Not Available]	No	L-Lower	[Not Available]	Lung Squamous Cell Carcinoma- Not Otherwise Specified (NOS)	2008	[Not Available]	[Not Available]	RX	6th	T2	N1	MX	Stage IIB	[Not Applicable]	[Not Applicable]	[Not Applicable]	[Not Applicable]	NO	[Not Available]	[Not Available]	[Not Available]	[Not Available]	[Not Available]	[Not Available]	[Not Available]	[Not Available]	[Not Available]	[Not Available]	[Not Available]	[Not Available]	No	[Not Available]	4	[Not Available]	[Not Available]	Dead	60	90	1	Preoperative
F400B427-954A-4F8A-A885-222E3E4C28AB	TCGA-33-AASJ	2014-06-13	Lung Squamous Cell Carcinoma	NO	YES	MALE	BLACK OR AFRICAN AMERICAN	NOT HISPANIC OR LATINO	[Not Available]	No	R-Lower	[Not Available]	Lung Squamous Cell Carcinoma- Not Otherwise Specified (NOS)	1999	[Not Available]	[Not Available]	R0	5th	T2	N0	MX	Stage IB	[Not Applicable]	[Not Applicable]	[Not Applicable]	[Not Applicable]	YES	60	37.5	79.4	49.6	80.9	[Not Available]	[Not Available]	[Not Available]	[Not Available]	[Not Available]	[Not Available]	[Not Available]	No	[Not Available]	4	1983	1991	Dead	[Not Available]	90	1	Preoperative
B9FC1FCF-17DC-496C-A072-7664382BC9BB	TCGA-33-AASL	2014-06-13	Lung Squamous Cell Carcinoma	NO	YES	FEMALE	BLACK OR AFRICAN AMERICAN	NOT HISPANIC OR LATINO	[Not Available]	No	R-Upper	[Not Available]	Lung Squamous Cell Carcinoma- Not Otherwise Specified (NOS)	2000	[Not Available]	[Not Available]	R0	5th	T1	N0	MX	Stage IA	[Not Applicable]	[Not Applicable]	[Not Applicable]	[Not Applicable]	YES	63.1	56.2	80	71.2	59.6	[Not Available]	[Not Available]	[Not Available]	[Not Available]	[Not Available]	[Not Available]	[Not Available]	No	[Not Available]	2	[Not Available]	[Not Available]	Dead	60	90	2	Preoperative
7d3e77cc-9603-4722-8e39-1912b678871b	TCGA-34-2596	2010-08-09	Lung Squamous Cell Carcinoma	NO	YES	MALE	WHITE	NOT HISPANIC OR LATINO	[Not Available]	No	Bronchial	[Not Available]	Lung Squamous Cell Carcinoma- Not Otherwise Specified (NOS)	2004	[Not Available]	[Not Available]	R0	[Not Available]	T2	N1	M0	Stage IIB	[Not Applicable]	[Not Applicable]	[Not Applicable]	[Not Applicable]	[Not Available]	[Not Available]	[Not Available]	[Not Available]	[Not Available]	[Not Available]	[Not Available]	[Not Available]	[Not Available]	[Not Available]	[Not Available]	[Not Available]	[Not Available]	No	[Not Available]	3	[Not Available]	1974	Dead	60	[Not Available]	[Not Available]	[Not Available]
da61857a-b00e-4a19-ab02-8fbb2ee56bea	TCGA-34-2600	2010-09-13	Lung Squamous Cell Carcinoma	NO	YES	FEMALE	WHITE	NOT HISPANIC OR LATINO	[Not Available]	No	R-Lower	Central Lung	Lung Squamous Cell Carcinoma- Not Otherwise Specified (NOS)	2000	[Not Available]	[Not Available]	R0	[Not Available]	T1	N0	M0	Stage IA	[Not Applicable]	[Not Applicable]	[Not Applicable]	[Not Applicable]	[Not Available]	[Not Available]	[Not Available]	[Not Available]	[Not Available]	[Not Available]	[Not Available]	[Not Available]	[Not Available]	[Not Available]	[Not Available]	[Not Available]	[Not Available]	No	[Not Available]	4	[Not Available]	1997	Dead	50	[Not Available]	[Not Available]	[Not Available]
cee6e9f6-6d7e-4096-a9bc-2cce004fb218	TCGA-34-2604	2010-11-04	Lung Squamous Cell Carcinoma	NO	YES	FEMALE	WHITE	NOT HISPANIC OR LATINO	[Not Available]	Yes	L-Lower	[Not Available]	Lung Squamous Cell Carcinoma- Not Otherwise Specified (NOS)	1999	[Not Available]	[Not Available]	R0	[Not Available]	T2	N0	M0	Stage IB	[Not Applicable]	[Not Applicable]	[Not Applicable]	[Not Applicable]	[Not Available]	[Not Available]	[Not Available]	[Not Available]	[Not Available]	[Not Available]	NO	[Not Available]	[Not Available]	NO	[Not Available]	NO	[Not Available]	No	[Not Available]	2	1933	[Not Available]	Dead	132	[Not Available]	[Not Available]	[Not Available]
9335e4df-9974-47ec-84c4-256cd33522f2	TCGA-34-2605	2010-11-04	Lung Squamous Cell Carcinoma	NO	YES	MALE	WHITE	NOT HISPANIC OR LATINO	[Not Available]	Yes	R-Upper	[Not Available]	Lung Squamous Cell Carcinoma- Not Otherwise Specified (NOS)	2006	[Not Available]	[Not Available]	R0	[Not Available]	T4	N1	M0	Stage IIIB	[Not Applicable]	[Not Applicable]	[Not Applicable]	[Not Applicable]	[Not Available]	[Not Available]	[Not Available]	[Not Available]	[Not Available]	[Not Available]	NO	[Not Available]	[Not Available]	NO	[Not Available]	NO	[Not Available]	No	[Not Available]	4	1946	2006	Dead	60	[Not Available]	1	Pre-Adjuvant Therapy
44c56277-37e5-47a9-b476-d8475ef477ca	TCGA-34-2608	2010-08-26	Lung Squamous Cell Carcinoma	NO	YES	MALE	WHITE	NOT HISPANIC OR LATINO	[Not Available]	No	L-Upper	[Not Available]	Lung Squamous Cell Carcinoma- Not Otherwise Specified (NOS)	1999	[Not Available]	[Not Available]	R0	[Not Available]	T2	N0	M0	Stage IB	[Not Applicable]	[Not Applicable]	[Not Applicable]	[Not Applicable]	[Not Available]	[Not Available]	[Not Available]	[Not Available]	[Not Available]	[Not Available]	[Not Available]	[Not Available]	[Not Available]	[Not Available]	[Not Available]	[Not Available]	[Not Available]	No	[Not Available]	3	[Not Available]	1959	Dead	60	[Not Available]	[Not Available]	[Not Available]
257650bd-2e2b-4680-b77b-f9268b3af4ee	TCGA-34-2609	2010-11-04	Lung Squamous Cell Carcinoma	NO	YES	MALE	BLACK OR AFRICAN AMERICAN	NOT HISPANIC OR LATINO	[Not Available]	Yes	R-Lower	[Not Available]	Lung Squamous Cell Carcinoma- Not Otherwise Specified (NOS)	2004	[Not Available]	[Not Available]	R0	[Not Available]	T2	N1	M0	Stage IIB	[Not Applicable]	[Not Applicable]	[Not Applicable]	[Not Applicable]	[Not Available]	[Not Available]	[Not Available]	[Not Available]	[Not Available]	[Not Available]	NO	[Not Available]	[Not Available]	NO	[Not Available]	NO	[Not Available]	No	[Not Available]	4	1941	2004	Dead	60	[Not Available]	[Not Available]	[Not Available]
f8733921-44bc-4c62-8b2d-33a9b82ef665	TCGA-34-5231	2011-08-26	Lung Squamous Cell Carcinoma	NO	YES	MALE	WHITE	NOT HISPANIC OR LATINO	[Not Available]	No	R-Upper	[Not Available]	Lung Squamous Cell Carcinoma- Not Otherwise Specified (NOS)	2006	[Not Available]	[Not Available]	[Not Available]	6th	T1	N0	M0	Stage IA	[Not Applicable]	[Not Applicable]	[Not Applicable]	[Not Applicable]	[Not Available]	[Not Available]	[Not Available]	[Not Available]	[Not Available]	[Not Available]	[Not Available]	[Not Available]	[Not Available]	YES	[Not Available]	[Not Available]	[Not Available]	No	[Not Available]	3	[Not Available]	[Not Available]	Alive	50	[Not Available]	[Not Available]	[Not Available]
d04bf59d-3429-4641-9f9e-81d8cde15295	TCGA-34-5232	2011-08-26	Lung Squamous Cell Carcinoma	NO	YES	FEMALE	BLACK OR AFRICAN AMERICAN	NOT HISPANIC OR LATINO	[Not Available]	No	L-Upper	[Not Available]	Lung Squamous Cell Carcinoma- Not Otherwise Specified (NOS)	2006	[Not Available]	[Not Available]	[Not Available]	6th	T1	N1	M0	Stage IIA	[Not Applicable]	[Not Applicable]	[Not Applicable]	[Not Applicable]	NO	[Not Available]	[Not Available]	[Not Available]	[Not Available]	[Not Available]	[Not Available]	[Not Available]	[Not Available]	YES	[Not Available]	[Not Available]	[Not Available]	No	[Not Available]	[Not Available]	[Not Available]	[Not Available]	Alive	[Not Available]	[Not Available]	[Not Available]	[Not Available]
349e01b0-0c88-4321-839e-0a84edf11a73	TCGA-34-5234	2011-03-08	Lung Squamous Cell Carcinoma	NO	YES	FEMALE	WHITE	NOT HISPANIC OR LATINO	[Not Available]	No	L-Upper	Central Lung	Lung Squamous Cell Carcinoma- Not Otherwise Specified (NOS)	2007	[Not Available]	[Not Available]	R0	6th	T1	N0	M0	Stage IA	[Not Applicable]	[Not Applicable]	[Not Applicable]	[Not Applicable]	NO	[Not Available]	[Not Available]	[Not Available]	[Not Available]	[Not Available]	NO	[Not Available]	[Not Available]	NO	[Not Available]	[Not Available]	[Not Available]	No	[Not Available]	4	1960	2000	Alive	40	90	[Not Available]	[Not Available]
31798d61-fb34-49dc-a20e-091c1a20eb6a	TCGA-34-5236	2011-08-26	Lung Squamous Cell Carcinoma	NO	YES	MALE	WHITE	NOT HISPANIC OR LATINO	[Not Available]	No	L-Upper	[Not Available]	Lung Squamous Cell Carcinoma- Not Otherwise Specified (NOS)	2007	[Not Available]	[Not Available]	[Not Available]	6th	T3	N0	M0	Stage IIB	[Not Applicable]	[Not Applicable]	[Not Applicable]	[Not Applicable]	[Not Available]	[Not Available]	[Not Available]	[Not Available]	[Not Available]	[Not Available]	[Not Available]	[Not Available]	[Not Available]	YES	[Not Available]	[Not Available]	[Not Available]	No	[Not Available]	[Not Available]	[Not Available]	[Not Available]	Dead	[Not Available]	[Not Available]	[Not Available]	[Not Available]
4631400b-1c96-4074-b779-7cbc77a49d99	TCGA-34-5239	2011-08-26	Lung Squamous Cell Carcinoma	NO	YES	MALE	WHITE	NOT HISPANIC OR LATINO	[Not Available]	No	L-Upper	[Not Available]	Lung Squamous Cell Carcinoma- Not Otherwise Specified (NOS)	2010	[Not Available]	[Not Available]	[Not Available]	7th	T4	N0	M0	Stage IIIA	[Not Applicable]	[Not Applicable]	[Not Applicable]	[Not Applicable]	NO	[Not Available]	[Not Available]	[Not Available]	[Not Available]	[Not Available]	[Not Available]	[Not Available]	[Not Available]	YES	[Not Available]	YES	[Not Available]	No	[Not Available]	[Not Available]	[Not Available]	[Not Available]	Alive	[Not Available]	[Not Available]	[Not Available]	[Not Available]
e7d1b042-5b1c-4c29-b501-a5ef4810ecd2	TCGA-34-5240	2011-02-10	Lung Squamous Cell Carcinoma	NO	YES	FEMALE	WHITE	NOT HISPANIC OR LATINO	[Not Available]	No	L-Upper	Central Lung	Lung Basaloid Squamous Cell Carcinoma	2009	[Not Available]	[Not Available]	[Not Available]	6th	T2	N1	M0	Stage IIB	[Not Applicable]	[Not Applicable]	[Not Applicable]	[Not Applicable]	NO	[Not Available]	[Not Available]	[Not Available]	[Not Available]	[Not Available]	NO	[Not Available]	[Not Available]	NO	[Not Available]	NO	[Not Available]	No	[Not Available]	2	1953	[Not Available]	Alive	56	[Not Available]	[Not Available]	[Not Available]
6013a4fd-89cf-48a7-a465-c7b644afb4a5	TCGA-34-5241	2011-02-10	Lung Squamous Cell Carcinoma	NO	YES	MALE	WHITE	NOT HISPANIC OR LATINO	[Not Available]	No	R-Lower	[Not Available]	Lung Squamous Cell Carcinoma- Not Otherwise Specified (NOS)	2009	[Not Available]	[Not Available]	[Not Available]	[Not Available]	T2	N0	M0	Stage IB	[Not Applicable]	[Not Applicable]	[Not Applicable]	[Not Applicable]	[Not Available]	[Not Available]	[Not Available]	[Not Available]	[Not Available]	[Not Available]	NO	NO	[Not Available]	[Not Available]	[Not Available]	NO	[Not Available]	No	[Not Available]	3	1954	1979	Alive	25	[Not Available]	[Not Available]	[Not Available]
18f18672-2a23-4e26-987b-38c454ff46c7	TCGA-34-5927	2011-08-26	Lung Squamous Cell Carcinoma	NO	YES	FEMALE	WHITE	[Not Available]	[Not Available]	No	R-Lower	[Not Available]	Lung Squamous Cell Carcinoma- Not Otherwise Specified (NOS)	2009	[Not Available]	[Not Available]	[Not Available]	[Not Available]	T1	N0	M0	Stage IA	[Not Applicable]	[Not Applicable]	[Not Applicable]	[Not Applicable]	NO	[Not Available]	[Not Available]	[Not Available]	[Not Available]	[Not Available]	[Not Available]	[Not Available]	[Not Available]	[Not Available]	[Not Available]	[Not Available]	[Not Available]	No	[Not Available]	[Not Available]	[Not Available]	[Not Available]	Alive	[Not Available]	[Not Available]	[Not Available]	[Not Available]
7abb4883-60b7-4882-b946-1a4665889257	TCGA-34-5928	2011-08-26	Lung Squamous Cell Carcinoma	NO	YES	FEMALE	WHITE	NOT HISPANIC OR LATINO	[Not Available]	No	L-Lower	[Not Available]	Lung Squamous Cell Carcinoma- Not Otherwise Specified (NOS)	2010	[Not Available]	[Not Available]	[Not Available]	7th	T2	N1	M0	Stage IIB	[Not Applicable]	[Not Applicable]	[Not Applicable]	[Not Applicable]	NO	[Not Available]	[Not Available]	[Not Available]	[Not Available]	[Not Available]	[Not Available]	[Not Available]	[Not Available]	[Not Available]	[Not Available]	[Not Available]	[Not Available]	No	[Not Available]	3	[Not Available]	1993	Alive	40	[Not Available]	[Not Available]	[Not Available]
ea34663c-f40e-4a3e-9ac0-65d5e9eef12b	TCGA-34-5929	2011-08-26	Lung Squamous Cell Carcinoma	NO	YES	FEMALE	WHITE	NOT HISPANIC OR LATINO	[Not Available]	No	L-Upper	[Not Available]	Lung Squamous Cell Carcinoma- Not Otherwise Specified (NOS)	2010	[Not Available]	[Not Available]	[Not Available]	7th	T2	N0	M0	Stage IB	[Not Applicable]	[Not Applicable]	[Not Applicable]	[Not Applicable]	[Not Available]	[Not Available]	[Not Available]	[Not Available]	[Not Available]	[Not Available]	[Not Available]	[Not Available]	[Not Available]	YES	[Not Available]	YES	[Not Available]	No	[Not Available]	3	[Not Available]	1985	Dead	40	[Not Available]	[Not Available]	[Not Available]
bef26f5e-a17e-49b7-8eb4-2bc079983764	TCGA-34-7107	2012-01-11	Lung Squamous Cell Carcinoma	NO	YES	MALE	WHITE	NOT HISPANIC OR LATINO	[Not Available]	No	R-Lower	[Not Available]	Lung Squamous Cell Carcinoma- Not Otherwise Specified (NOS)	2011	[Not Available]	[Not Available]	[Not Available]	7th	T2a	N0	M0	Stage II	[Not Applicable]	[Not Applicable]	[Not Applicable]	[Not Applicable]	[Not Available]	[Not Available]	[Not Available]	[Not Available]	[Not Available]	[Not Available]	[Not Available]	[Not Available]	[Not Available]	[Not Available]	[Not Available]	[Not Available]	[Not Available]	No	[Not Available]	4	[Not Available]	[Not Available]	Dead	[Not Available]	[Not Available]	[Not Available]	[Not Available]
059212b3-9e71-4d00-863f-3639c4e30ed1	TCGA-34-8454	2012-10-18	Lung Squamous Cell Carcinoma	YES	NO	FEMALE	WHITE	NOT HISPANIC OR LATINO	[Not Available]	No	R-Lower	[Not Available]	Lung Squamous Cell Carcinoma- Not Otherwise Specified (NOS)	2011	[Not Available]	[Not Available]	R0	7th	T3	N1	M0	Stage IIIA	[Not Applicable]	[Not Applicable]	[Not Applicable]	[Not Applicable]	NO	[Not Available]	[Not Available]	[Not Available]	[Not Available]	[Not Available]	[Not Available]	[Not Available]	[Not Available]	[Not Available]	[Not Available]	[Not Available]	[Not Available]	No	[Not Available]	4	[Not Available]	[Not Available]	Alive	90	[Not Available]	[Not Available]	[Not Available]
02ba8600-9d3d-489d-9f0b-f1c59085ecd6	TCGA-34-8455	2012-10-19	Lung Squamous Cell Carcinoma	YES	NO	MALE	WHITE	NOT HISPANIC OR LATINO	[Not Available]	No	L-Upper	[Not Available]	Lung Squamous Cell Carcinoma- Not Otherwise Specified (NOS)	2011	[Not Available]	[Not Available]	R0	7th	T4	N0	M1a	Stage IV	[Not Applicable]	[Not Applicable]	[Not Applicable]	[Not Applicable]	NO	[Not Available]	[Not Available]	[Not Available]	[Not Available]	[Not Available]	[Not Available]	[Not Available]	[Not Available]	[Not Available]	[Not Available]	[Not Available]	[Not Available]	No	[Not Available]	4	[Not Available]	[Not Available]	Dead	50	[Not Available]	[Not Available]	[Not Available]
7d8d5dff-bdc1-4000-bc52-1fc3be3f6da4	TCGA-34-8456	2012-10-19	Lung Squamous Cell Carcinoma	YES	NO	FEMALE	WHITE	NOT HISPANIC OR LATINO	[Not Available]	No	R-Lower	[Not Available]	Lung Squamous Cell Carcinoma- Not Otherwise Specified (NOS)	2011	[Not Available]	[Not Available]	R0	7th	T2a	N1	M0	Stage IIA	[Not Applicable]	[Not Applicable]	[Not Applicable]	[Not Applicable]	NO	[Not Available]	[Not Available]	[Not Available]	[Not Available]	[Not Available]	[Not Available]	[Not Available]	[Not Available]	[Not Available]	[Not Available]	[Not Available]	[Not Available]	No	[Not Available]	5	[Not Available]	[Not Available]	Alive	20	[Not Available]	[Not Available]	[Not Available]
4EAF5D63-9B33-4C7F-871E-45DAA735F972	TCGA-34-A5IX	2014-03-03	Lung Squamous Cell Carcinoma	YES	NO	MALE	WHITE	NOT HISPANIC OR LATINO	[Not Available]	No	R-Lower	[Not Available]	Lung Squamous Cell Carcinoma- Not Otherwise Specified (NOS)	2012	[Not Available]	[Not Available]	[Not Available]	7th	T3	N0	M0	Stage IIB	[Not Applicable]	[Not Applicable]	[Not Applicable]	[Not Applicable]	NO	[Not Available]	[Not Available]	[Not Available]	[Not Available]	[Not Available]	[Not Available]	[Not Available]	[Not Available]	[Not Available]	[Not Available]	[Not Available]	[Not Available]	No	[Not Available]	4	[Not Available]	2008	Alive	[Not Available]	[Not Available]	[Not Available]	[Not Available]
8a235eb8-d67d-49fe-a473-1777eb7e7c60	TCGA-37-3783	2010-12-17	Lung Squamous Cell Carcinoma	NO	YES	MALE	WHITE	NOT HISPANIC OR LATINO	[Not Available]	No	L-Upper	Central Lung	Lung Squamous Cell Carcinoma- Not Otherwise Specified (NOS)	2006	[Not Available]	[Not Available]	R0	7th	T3	N2	M0	Stage IIIA	[Not Applicable]	[Not Applicable]	[Not Applicable]	[Not Applicable]	YES	[Not Available]	[Not Available]	[Not Available]	[Not Available]	[Not Available]	NO	[Not Available]	[Not Available]	NO	[Not Available]	NO	[Not Available]	No	[Not Available]	[Not Available]	[Not Available]	[Not Available]	Alive	[Not Available]	[Not Available]	[Not Available]	[Not Available]
fd881d58-c9c7-479b-b76b-1f3c2ab1b015	TCGA-37-3789	2010-12-17	Lung Squamous Cell Carcinoma	NO	YES	MALE	WHITE	NOT HISPANIC OR LATINO	[Not Available]	No	L-Upper	Central Lung	Lung Squamous Cell Carcinoma- Not Otherwise Specified (NOS)	2006	[Not Available]	[Not Available]	R0	7th	T2	N0	[Not Available]	Stage IB	[Not Applicable]	[Not Applicable]	[Not Applicable]	[Not Applicable]	YES	[Not Available]	[Not Available]	[Not Available]	[Not Available]	[Not Available]	NO	[Not Available]	[Not Available]	NO	[Not Available]	NO	[Not Available]	No	[Not Available]	1	[Not Available]	[Not Available]	Alive	[Not Available]	[Not Available]	[Not Available]	[Not Available]
4a81f496-bf8e-43e8-8332-9aaef09f485f	TCGA-37-3792	2010-12-17	Lung Squamous Cell Carcinoma	NO	YES	MALE	WHITE	NOT HISPANIC OR LATINO	[Not Available]	No	R-Upper	Central Lung	Lung Squamous Cell Carcinoma- Not Otherwise Specified (NOS)	2006	[Not Available]	[Not Available]	R0	7th	T2	N0	M0	Stage IB	[Not Applicable]	[Not Applicable]	[Not Applicable]	[Not Applicable]	YES	[Not Available]	[Not Available]	[Not Available]	[Not Available]	[Not Available]	NO	[Not Available]	[Not Available]	NO	[Not Available]	NO	[Not Available]	No	[Not Available]	1	[Not Available]	[Not Available]	Alive	[Not Available]	[Not Available]	[Not Available]	[Not Available]
95c4c851-6ca3-4416-90ed-73f46f211583	TCGA-37-4129	2010-12-16	Lung Squamous Cell Carcinoma	NO	YES	FEMALE	WHITE	NOT HISPANIC OR LATINO	[Not Available]	No	R-Middle	Central Lung	Lung Squamous Cell Carcinoma- Not Otherwise Specified (NOS)	2010	[Not Available]	[Not Available]	R0	7th	T1b	N0	M0	Stage IA	[Not Applicable]	[Not Applicable]	[Not Applicable]	[Not Applicable]	YES	[Not Available]	[Not Available]	[Not Available]	[Not Available]	[Not Available]	NO	[Not Available]	[Not Available]	NO	[Not Available]	NO	[Not Available]	No	[Not Available]	4	1980	2010	Alive	30	90	1	Preoperative
ac89e063-a288-4516-9d9e-92cc0ed2bc24	TCGA-37-4130	2010-12-16	Lung Squamous Cell Carcinoma	NO	YES	MALE	WHITE	NOT HISPANIC OR LATINO	[Not Available]	No	R-Upper	Central Lung	Lung Squamous Cell Carcinoma- Not Otherwise Specified (NOS)	2010	[Not Available]	[Not Available]	R0	7th	T1b	N0	M0	Stage IA	[Not Applicable]	[Not Applicable]	[Not Applicable]	[Not Applicable]	YES	[Not Available]	[Not Available]	[Not Available]	[Not Available]	[Not Available]	NO	[Not Available]	[Not Available]	NO	[Not Available]	NO	[Not Available]	No	[Not Available]	4	1985	2010	Alive	25	90	1	Preoperative
09d08a43-4dcb-46d6-b2bd-f6245a6fff21	TCGA-37-4132	2010-12-16	Lung Squamous Cell Carcinoma	NO	YES	FEMALE	WHITE	NOT HISPANIC OR LATINO	[Not Available]	No	L-Lower	Peripheral Lung	Lung Squamous Cell Carcinoma- Not Otherwise Specified (NOS)	2010	[Not Available]	[Not Available]	R0	7th	T2	N0	M1	Stage IV	[Not Applicable]	[Not Applicable]	[Not Applicable]	[Not Applicable]	YES	[Not Available]	[Not Available]	[Not Available]	[Not Available]	[Not Available]	NO	[Not Available]	[Not Available]	NO	[Not Available]	NO	[Not Available]	No	[Not Available]	1	[Not Available]	[Not Available]	Alive	[Not Available]	50	2	Post-Adjuvant Therapy
34193c52-837c-4cf8-850a-00ae55be28ec	TCGA-37-4133	2010-12-16	Lung Squamous Cell Carcinoma	NO	YES	MALE	WHITE	NOT HISPANIC OR LATINO	[Not Available]	No	R-Lower	Peripheral Lung	Lung Squamous Cell Carcinoma- Not Otherwise Specified (NOS)	2010	[Not Available]	[Not Available]	R0	7th	T4	N0	M0	Stage IIIA	[Not Applicable]	[Not Applicable]	[Not Applicable]	[Not Applicable]	YES	[Not Available]	[Not Available]	[Not Available]	[Not Available]	[Not Available]	NO	[Not Available]	[Not Available]	NO	[Not Available]	NO	[Not Available]	No	[Not Available]	4	1970	2010	Alive	40	50	2	Post-Adjuvant Therapy
1f6b2aca-7357-40d1-ba7a-99227d9900a2	TCGA-37-4135	2010-12-16	Lung Squamous Cell Carcinoma	NO	YES	MALE	WHITE	NOT HISPANIC OR LATINO	[Not Available]	No	R-Lower	Peripheral Lung	Lung Squamous Cell Carcinoma- Not Otherwise Specified (NOS)	2010	[Not Available]	[Not Available]	R0	7th	T2a	N0	M0	Stage IB	[Not Applicable]	[Not Applicable]	[Not Applicable]	[Not Applicable]	YES	[Not Available]	[Not Available]	[Not Available]	[Not Available]	[Not Available]	NO	[Not Available]	[Not Available]	NO	[Not Available]	NO	[Not Available]	No	[Not Available]	4	1965	2010	Alive	45	80	1	Other
5d3d3918-7da8-4147-90a3-dc015be1dfbe	TCGA-37-4141	2010-12-17	Lung Squamous Cell Carcinoma	NO	YES	FEMALE	WHITE	NOT HISPANIC OR LATINO	[Not Available]	No	R-Upper	Peripheral Lung	Lung Squamous Cell Carcinoma- Not Otherwise Specified (NOS)	2010	[Not Available]	[Not Available]	R0	7th	T1b	N0	M0	Stage IA	[Not Applicable]	[Not Applicable]	[Not Applicable]	[Not Applicable]	YES	[Not Available]	[Not Available]	[Not Available]	[Not Available]	[Not Available]	NO	[Not Available]	[Not Available]	NO	[Not Available]	NO	[Not Available]	No	[Not Available]	1	[Not Available]	[Not Available]	Alive	[Not Available]	[Not Available]	[Not Available]	[Not Available]
6eae9623-b4f2-440c-8283-46c7016f953a	TCGA-37-5819	2011-05-20	Lung Squamous Cell Carcinoma	NO	YES	MALE	WHITE	NOT HISPANIC OR LATINO	[Not Available]	No	R-Upper	Peripheral Lung	Lung Squamous Cell Carcinoma- Not Otherwise Specified (NOS)	2010	[Not Available]	[Not Available]	R0	7th	T2	N2	M0	Stage IIIA	[Not Applicable]	[Not Applicable]	[Not Applicable]	[Not Applicable]	YES	[Not Available]	[Not Available]	[Not Available]	[Not Available]	[Not Available]	[Not Available]	[Not Available]	[Not Available]	[Not Available]	[Not Available]	[Not Available]	[Not Available]	No	[Not Available]	4	1965	2010	Alive	45	90	1	Post-Adjuvant Therapy
AECD6689-F203-4519-AFAB-3F46EE9D3E2C	TCGA-37-A5EL	2014-11-13	Lung Squamous Cell Carcinoma	YES	NO	MALE	WHITE	NOT HISPANIC OR LATINO	[Not Available]	No	L-Upper	Central Lung	Lung Squamous Cell Carcinoma- Not Otherwise Specified (NOS)	2011	[Not Available]	[Not Available]	[Not Evaluated]	7th	T3	N0	M0	Stage IIB	[Not Applicable]	[Not Applicable]	[Not Applicable]	[Not Applicable]	NO	[Not Available]	[Not Available]	[Not Available]	[Not Available]	[Not Available]	[Not Available]	[Not Available]	[Not Available]	[Not Available]	[Not Available]	[Not Available]	[Not Available]	No	[Not Available]	[Unknown]	[Not Available]	[Not Available]	Alive	[Not Available]	[Not Available]	[Not Available]	[Not Available]
1CBF2CAD-75C3-4615-9734-0FCDC00DCEE5	TCGA-37-A5EM	2014-11-13	Lung Squamous Cell Carcinoma	YES	NO	MALE	WHITE	NOT HISPANIC OR LATINO	[Not Available]	No	L-Upper	Central Lung	Lung Squamous Cell Carcinoma- Not Otherwise Specified (NOS)	2011	[Not Available]	[Not Available]	[Not Evaluated]	7th	T2	N0	M0	Stage II	[Not Applicable]	[Not Applicable]	[Not Applicable]	[Not Applicable]	NO	[Not Available]	[Not Available]	[Not Available]	[Not Available]	[Not Available]	[Not Available]	[Not Available]	[Not Available]	[Not Available]	[Not Available]	[Not Available]	[Not Available]	No	[Not Available]	[Unknown]	[Not Available]	[Not Available]	Alive	[Not Available]	[Not Available]	[Not Available]	[Not Available]
D00D93D5-8D6B-4E5B-816C-F3D726D65D3D	TCGA-37-A5EN	2014-11-13	Lung Squamous Cell Carcinoma	YES	NO	MALE	WHITE	NOT HISPANIC OR LATINO	[Not Available]	No	R-Middle	Central Lung	Lung Squamous Cell Carcinoma- Not Otherwise Specified (NOS)	2011	[Not Available]	[Not Available]	[Not Available]	7th	T4	N2	M0	Stage IIIB	[Not Applicable]	[Not Applicable]	[Not Applicable]	[Not Applicable]	NO	[Not Available]	[Not Available]	[Not Available]	[Not Available]	[Not Available]	[Not Available]	[Not Available]	[Not Available]	[Not Available]	[Not Available]	[Not Available]	[Not Available]	No	[Not Available]	[Unknown]	[Not Available]	[Not Available]	Alive	[Not Available]	[Not Available]	[Not Available]	[Not Available]
5845fe49-f2cc-436b-9ec8-65e775eae111	TCGA-39-5011	2010-12-03	Lung Squamous Cell Carcinoma	NO	YES	FEMALE	WHITE	NOT HISPANIC OR LATINO	[Not Available]	No	R-Lower	Peripheral Lung	Lung Squamous Cell Carcinoma- Not Otherwise Specified (NOS)	2002	[Not Available]	[Not Available]	R0	6th	T1b	N0	M0	Stage IA	[Not Applicable]	[Not Applicable]	[Not Applicable]	[Not Applicable]	YES	63	72	66	[Not Available]	75	NO	[Not Available]	[Not Available]	NO	[Not Available]	NO	[Not Available]	No	[Not Available]	4	[Not Available]	1995	Alive	45	[Not Available]	[Not Available]	[Not Available]
17919a6e-3106-49fa-9fea-8f06c595d617	TCGA-39-5016	2010-12-04	Lung Squamous Cell Carcinoma	NO	YES	MALE	WHITE	[Not Available]	[Not Available]	No	R-Lower	Central Lung	Lung Basaloid Squamous Cell Carcinoma	2003	[Not Available]	[Not Available]	R0	6th	T2a	N1	M0	Stage IIA	[Not Applicable]	[Not Applicable]	[Not Applicable]	[Not Applicable]	YES	77	75	73	73	98	NO	[Not Available]	[Not Available]	NO	[Not Available]	NO	[Not Available]	No	[Not Available]	4	[Not Available]	2003	Alive	40	[Not Available]	[Not Available]	[Not Available]
14a4a93a-e24d-46f2-bee3-18bd792ef95a	TCGA-39-5019	2011-06-20	Lung Squamous Cell Carcinoma	NO	YES	MALE	WHITE	NOT HISPANIC OR LATINO	[Not Available]	No	R-Upper	Peripheral Lung	Lung Squamous Cell Carcinoma- Not Otherwise Specified (NOS)	2004	[Not Available]	[Not Available]	R0	7th	T2a	N0	M0	Stage IB	[Not Applicable]	[Not Applicable]	[Not Applicable]	[Not Applicable]	YES	57	62	76	72	96	NO	[Not Available]	[Not Available]	NO	[Not Available]	NO	[Not Available]	No	[Not Available]	3	[Not Available]	[Not Available]	Alive	30	[Not Available]	[Not Available]	[Not Available]
e7020168-1afe-4361-800a-8979aafca12a	TCGA-39-5021	2010-12-04	Lung Squamous Cell Carcinoma	NO	YES	MALE	WHITE	NOT HISPANIC OR LATINO	[Not Available]	No	L-Upper	Central Lung	Lung Squamous Cell Carcinoma- Not Otherwise Specified (NOS)	2004	[Not Available]	[Not Available]	R0	[Not Available]	T2a	N0	M0	Stage IB	[Not Applicable]	[Not Applicable]	[Not Applicable]	[Not Applicable]	[Not Available]	[Not Available]	[Not Available]	[Not Available]	[Not Available]	[Not Available]	NO	NO	[Not Available]	NO	[Not Available]	NO	[Not Available]	No	[Not Available]	4	1947	2004	Dead	114	[Not Available]	[Not Available]	[Not Available]
9eb9e06f-bdfd-47f0-b5be-472a1e276f2c	TCGA-39-5022	2011-09-19	Lung Squamous Cell Carcinoma	NO	YES	MALE	WHITE	NOT HISPANIC OR LATINO	[Not Available]	No	R-Upper	Peripheral Lung	Lung Squamous Cell Carcinoma- Not Otherwise Specified (NOS)	2005	[Not Available]	[Not Available]	R0	7th	T2a	N0	M0	Stage IB	[Not Applicable]	[Not Applicable]	[Not Applicable]	[Not Applicable]	[Not Available]	[Not Available]	[Not Available]	[Not Available]	[Not Available]	[Not Available]	NO	[Not Available]	[Not Available]	NO	[Not Available]	NO	[Not Available]	No	[Not Available]	4	1996	2005	Dead	35	[Not Available]	[Not Available]	[Not Available]
3a74420c-9ee6-4131-8aff-7265b047e6a8	TCGA-39-5024	2011-10-06	Lung Squamous Cell Carcinoma	NO	YES	FEMALE	WHITE	NOT HISPANIC OR LATINO	[Not Available]	No	Bronchial	Central Lung	Lung Squamous Cell Carcinoma- Not Otherwise Specified (NOS)	2005	[Not Available]	[Not Available]	R0	7th	T2a	N2	M0	Stage IIIA	[Not Applicable]	[Not Applicable]	[Not Applicable]	[Not Applicable]	YES	88	87	91	96	81	NO	[Not Available]	[Not Available]	NO	[Not Available]	NO	[Not Available]	No	[Not Available]	4	1964	2005	Alive	40	[Not Available]	[Not Available]	[Not Available]
dd7eda40-9aae-46b2-914e-788b76b43087	TCGA-39-5027	2011-09-19	Lung Squamous Cell Carcinoma	NO	YES	MALE	WHITE	NOT HISPANIC OR LATINO	[Not Available]	No	R-Lower	Peripheral Lung	Lung Squamous Cell Carcinoma- Not Otherwise Specified (NOS)	2006	[Not Available]	[Not Available]	R0	7th	T2a	N0	M0	Stage IB	[Not Applicable]	[Not Applicable]	[Not Applicable]	[Not Applicable]	YES	55	63	78	82	79	NO	[Not Available]	[Not Available]	NO	[Not Available]	NO	[Not Available]	No	[Not Available]	4	1946	2002	Alive	40	[Not Available]	[Not Available]	[Not Available]
d9b6a10e-ab02-47d9-a6c2-bb0c80238d29	TCGA-39-5028	2010-12-04	Lung Squamous Cell Carcinoma	NO	YES	MALE	WHITE	NOT HISPANIC OR LATINO	[Not Available]	No	R-Upper	Central Lung	Lung Squamous Cell Carcinoma- Not Otherwise Specified (NOS)	2006	[Not Available]	[Not Available]	R0	[Not Available]	T4	N1	M0	Stage IIIA	[Not Applicable]	[Not Applicable]	[Not Applicable]	[Not Applicable]	[Not Available]	[Not Available]	[Not Available]	[Not Available]	[Not Available]	[Not Available]	NO	NO	[Not Available]	NO	[Not Available]	NO	[Not Available]	No	[Not Available]	3	1946	1981	Dead	30	[Not Available]	[Not Available]	[Not Available]
2f39e89c-a8f7-4df8-a0f5-ef9990c2133c	TCGA-39-5029	2010-12-04	Lung Squamous Cell Carcinoma	NO	YES	MALE	WHITE	HISPANIC OR LATINO	[Not Available]	No	L-Lower	Central Lung	Lung Squamous Cell Carcinoma- Not Otherwise Specified (NOS)	2006	[Not Available]	[Not Available]	R0	[Not Available]	T1b	N2	M0	Stage IIIA	[Not Applicable]	[Not Applicable]	[Not Applicable]	[Not Applicable]	[Not Available]	[Not Available]	[Not Available]	[Not Available]	[Not Available]	[Not Available]	NO	[Discrepancy]	[Not Available]	NO	[Not Available]	NO	[Not Available]	No	[Not Available]	4	1958	2006	Dead	192	[Not Available]	[Not Available]	[Not Available]
865a1b5a-6d94-4e06-b5a0-ac11e2221679	TCGA-39-5030	2010-12-04	Lung Squamous Cell Carcinoma	NO	YES	FEMALE	ASIAN	[Not Available]	[Not Available]	No	L-Lower	Peripheral Lung	Lung Squamous Cell Carcinoma- Not Otherwise Specified (NOS)	2006	[Not Available]	[Not Available]	R0	[Not Available]	T2a	N2	M0	Stage IIIA	[Not Applicable]	[Not Applicable]	[Not Applicable]	[Not Applicable]	[Not Available]	[Not Available]	[Not Available]	[Not Available]	[Not Available]	[Not Available]	NO	NO	[Not Available]	NO	[Not Available]	NO	[Not Available]	No	[Not Available]	3	1960	1971	Dead	8	[Not Available]	[Not Available]	[Not Available]
9f20b4bc-ee09-42ef-9392-68054a7a2cfe	TCGA-39-5031	2010-12-06	Lung Squamous Cell Carcinoma	NO	YES	FEMALE	[Not Available]	[Not Available]	[Not Available]	No	L-Upper	Peripheral Lung	Lung Squamous Cell Carcinoma- Not Otherwise Specified (NOS)	2007	[Not Available]	[Not Available]	R0	6th	T1a	N0	M0	Stage IA	[Not Applicable]	[Not Applicable]	[Not Applicable]	[Not Applicable]	YES	76	79	85	89	58	NO	[Not Available]	[Not Available]	NO	[Not Available]	NO	[Not Available]	No	[Not Available]	4	1946	1997	Alive	60	[Not Available]	[Not Available]	[Not Available]
be5dcf02-8097-4a97-af32-6a9b02c079d3	TCGA-39-5034	2010-12-06	Lung Squamous Cell Carcinoma	NO	YES	FEMALE	WHITE	NOT HISPANIC OR LATINO	[Not Available]	No	R-Upper	Peripheral Lung	Lung Squamous Cell Carcinoma- Not Otherwise Specified (NOS)	2007	[Not Available]	[Not Available]	R0	[Not Available]	T3	N0	M0	Stage IIB	[Not Applicable]	[Not Applicable]	[Not Applicable]	[Not Applicable]	[Not Available]	[Not Available]	[Not Available]	[Not Available]	[Not Available]	[Not Available]	YES	NO	[Not Available]	YES	[Not Available]	NO	[Not Available]	No	[Not Available]	4	1950	2007	Dead	84	[Not Available]	[Not Available]	[Not Available]
ba10f90b-66e1-44cd-b6c0-08c448a9d688	TCGA-39-5035	2010-12-06	Lung Squamous Cell Carcinoma	NO	YES	FEMALE	WHITE	NOT HISPANIC OR LATINO	[Not Available]	No	R-Lower	Central Lung	Lung Squamous Cell Carcinoma- Not Otherwise Specified (NOS)	2007	[Not Available]	[Not Available]	R0	6th	T1b	N0	M0	Stage IA	[Not Applicable]	[Not Applicable]	[Not Applicable]	[Not Applicable]	YES	68	71	63	67	39	NO	[Not Available]	[Not Available]	NO	[Not Available]	NO	[Not Available]	No	[Not Available]	4	1950	1997	Alive	47	[Not Available]	[Not Available]	[Not Available]
3ebd3dcd-b4f1-449c-8b2f-86f90643676b	TCGA-39-5036	2010-12-06	Lung Squamous Cell Carcinoma	NO	YES	MALE	WHITE	[Not Available]	[Not Available]	No	L-Upper	Peripheral Lung	Lung Squamous Cell Carcinoma- Not Otherwise Specified (NOS)	2007	[Not Available]	[Not Available]	R0	6th	T2	N0	M0	Stage IB	[Not Applicable]	[Not Applicable]	[Not Applicable]	[Not Applicable]	YES	61	62	53	49	71	NO	[Not Available]	[Not Available]	NO	[Not Available]	NO	[Not Available]	No	[Not Available]	4	1957	2000	Alive	63	[Not Available]	[Not Available]	[Not Available]
02eb85cc-a597-4eaa-9614-c94c0f035929	TCGA-39-5037	2010-12-06	Lung Squamous Cell Carcinoma	NO	YES	MALE	WHITE	NOT HISPANIC OR LATINO	[Not Available]	No	L-Lower	Central Lung	Lung Squamous Cell Carcinoma- Not Otherwise Specified (NOS)	2007	[Not Available]	[Not Available]	R0	6th	T1b	N1	M0	Stage IIA	[Not Applicable]	[Not Applicable]	[Not Applicable]	[Not Applicable]	YES	56	60	61	56	79	NO	[Not Available]	[Not Available]	NO	[Not Available]	NO	[Not Available]	No	[Not Available]	2	1969	[Not Available]	Alive	26	[Not Available]	[Not Available]	[Not Available]
ffb83f21-06d9-4e52-a2d0-e85c13f4037f	TCGA-39-5039	2010-12-06	Lung Squamous Cell Carcinoma	NO	YES	MALE	WHITE	[Not Available]	[Not Available]	Yes	R-Upper	Central Lung	Lung Squamous Cell Carcinoma- Not Otherwise Specified (NOS)	2008	[Not Available]	[Not Available]	R0	[Not Available]	T2b	N0	M0	Stage IIA	[Not Applicable]	[Not Applicable]	[Not Applicable]	[Not Applicable]	[Not Available]	[Not Available]	[Not Available]	[Not Available]	[Not Available]	[Not Available]	NO	NO	[Not Available]	NO	[Not Available]	NO	[Not Available]	No	[Not Available]	3	1949	1983	Dead	64	[Not Available]	[Not Available]	[Not Available]
eca4bfa2-5ba5-4708-959a-d901c1b61edd	TCGA-39-5040	2012-03-05	Lung Squamous Cell Carcinoma	NO	YES	MALE	WHITE	NOT HISPANIC OR LATINO	[Not Available]	No	L-Upper	Peripheral Lung	Lung Squamous Cell Carcinoma- Not Otherwise Specified (NOS)	2008	[Not Available]	[Not Available]	R0	7th	T2a	N2	M0	Stage IIIA	[Not Applicable]	[Not Applicable]	[Not Applicable]	[Not Applicable]	YES	97	[Not Available]	93	[Not Available]	80	NO	[Not Available]	[Not Available]	NO	[Not Available]	NO	[Not Available]	No	[Not Available]	4	1964	2005	Dead	60	[Not Available]	[Not Available]	Preoperative
0806923c-2dee-403d-a2e9-771722873b0d	TCGA-43-2576	2010-10-19	Lung Squamous Cell Carcinoma	YES	NO	FEMALE	WHITE	NOT HISPANIC OR LATINO	[Not Available]	No	L-Upper	[Not Available]	Lung Squamous Cell Carcinoma- Not Otherwise Specified (NOS)	2009	[Not Available]	[Not Available]	R0	6th	T2	N2	M0	Stage IIIA	[Not Applicable]	[Not Applicable]	[Not Applicable]	[Not Applicable]	YES	69	75	70	79	72	NO	[Not Available]	[Not Available]	[Not Available]	[Not Available]	[Not Available]	[Not Available]	No	[Not Available]	4	1969	2004	Alive	20	90	[Not Available]	Pre-Adjuvant Therapy
37f5457e-21d9-4b79-95d5-ded6f2e43087	TCGA-43-2578	2010-10-18	Lung Squamous Cell Carcinoma	YES	NO	FEMALE	WHITE	NOT HISPANIC OR LATINO	[Not Available]	Yes	L-Upper	[Not Available]	Lung Squamous Cell Carcinoma- Not Otherwise Specified (NOS)	2009	[Not Available]	[Not Available]	R0	6th	T1	N0	M0	Stage IA	[Not Applicable]	[Not Applicable]	[Not Applicable]	[Not Applicable]	YES	42	45	63	60	[Not Available]	NO	[Not Available]	[Not Available]	[Not Available]	[Not Available]	[Not Available]	[Not Available]	No	[Not Available]	4	1968	2000	Alive	64	[Not Available]	0	Preoperative
ad112acb-d241-48a0-8e48-d69cdc3feba8	TCGA-43-2581	2010-10-12	Lung Squamous Cell Carcinoma	YES	NO	FEMALE	WHITE	NOT HISPANIC OR LATINO	[Not Available]	No	R-Upper	[Not Available]	Lung Squamous Cell Carcinoma- Not Otherwise Specified (NOS)	2009	[Not Available]	[Not Available]	R0	6th	T3	N1	M0	Stage IIIA	[Not Applicable]	[Not Applicable]	[Not Applicable]	[Not Applicable]	YES	38	44	41	50	50	NO	[Not Available]	[Not Available]	[Not Available]	[Not Available]	[Not Available]	[Not Available]	No	[Not Available]	2	1979	[Not Available]	Alive	30	[Not Available]	1	Pre-Adjuvant Therapy
ce8612ab-3149-4a6a-b424-29c0c21c9b8b	TCGA-43-3394	2010-10-11	Lung Squamous Cell Carcinoma	YES	NO	MALE	BLACK OR AFRICAN AMERICAN	NOT HISPANIC OR LATINO	[Not Available]	No	L-Lower	[Not Available]	Lung Squamous Cell Carcinoma- Not Otherwise Specified (NOS)	2009	[Not Available]	[Not Available]	R0	6th	T2a	N0	M0	Stage IB	[Not Applicable]	[Not Applicable]	[Not Applicable]	[Not Applicable]	YES	36	50	60	60	81	NO	[Not Available]	[Not Available]	[Not Available]	[Not Available]	[Not Available]	[Not Available]	No	[Not Available]	2	1979	[Not Available]	Alive	15	[Not Available]	0	Other
9293e197-e38a-4e19-a7d0-1b45d1ad48bd	TCGA-43-3920	2010-10-11	Lung Squamous Cell Carcinoma	YES	NO	MALE	WHITE	NOT HISPANIC OR LATINO	[Not Available]	No	R-Upper	[Not Available]	Lung Squamous Cell Carcinoma- Not Otherwise Specified (NOS)	2009	[Not Available]	[Not Available]	R0	7th	T2	N0	M0	Stage IB	[Not Applicable]	[Not Applicable]	[Not Applicable]	[Not Applicable]	YES	78	77	95	97	50	NO	[Not Available]	[Not Available]	[Not Available]	[Not Available]	[Not Available]	[Not Available]	No	[Not Available]	4	1959	2009	Alive	50	[Not Available]	[Not Available]	[Not Available]
f5ad138c-1714-41e9-9c2d-c88050bec407	TCGA-43-5668	2011-04-14	Lung Squamous Cell Carcinoma	YES	NO	MALE	WHITE	NOT HISPANIC OR LATINO	[Not Available]	Yes	R-Upper	[Not Available]	Lung Squamous Cell Carcinoma- Not Otherwise Specified (NOS)	2010	[Not Available]	[Not Available]	[Not Available]	7th	T1b	N1	M0	Stage IIA	[Not Applicable]	[Not Applicable]	[Not Applicable]	[Not Applicable]	YES	74	83	84	89	61	[Not Available]	[Not Available]	[Not Available]	[Not Available]	[Not Available]	[Not Available]	[Not Available]	No	[Not Available]	3	[Not Available]	1983	Alive	20	[Not Available]	1	Pre-Adjuvant Therapy
7d905f8f-3967-4ea8-96c8-17b1b03fbec3	TCGA-43-5670	2012-02-23	Lung Squamous Cell Carcinoma	YES	NO	MALE	WHITE	NOT HISPANIC OR LATINO	[Not Available]	No	L-Lower	[Not Available]	Lung Squamous Cell Carcinoma- Not Otherwise Specified (NOS)	2010	[Not Available]	[Not Available]	[Not Available]	7th	T2b	N0	M0	Stage IIA	[Not Applicable]	[Not Applicable]	[Not Applicable]	[Not Applicable]	YES	100	108	92	98	53	[Not Available]	[Not Available]	[Not Available]	[Not Available]	[Not Available]	[Not Available]	[Not Available]	No	[Not Available]	3	1970	1980	Alive	30	[Not Available]	0	Post-Adjuvant Therapy
a8764401-d2a5-45dd-941d-2ffb2e7a4664	TCGA-43-6143	2011-08-24	Lung Squamous Cell Carcinoma	YES	NO	MALE	WHITE	NOT HISPANIC OR LATINO	[Not Available]	No	R-Lower	[Not Available]	Lung Basaloid Squamous Cell Carcinoma	2010	[Not Available]	[Not Available]	RX	7th	T2	N0	M0	Stage IB	[Not Applicable]	[Not Applicable]	[Not Applicable]	[Not Applicable]	YES	45	50	78	77	40	[Not Available]	[Not Available]	[Not Available]	[Not Available]	[Not Available]	[Not Available]	[Not Available]	No	[Not Available]	4	1953	2010	Alive	114	[Not Available]	1	Pre-Adjuvant Therapy
40e928e8-bedd-4b86-81bc-b581bfc897d4	TCGA-43-6647	2011-08-24	Lung Squamous Cell Carcinoma	YES	NO	FEMALE	WHITE	NOT HISPANIC OR LATINO	[Not Available]	No	R-Lower	[Not Available]	Lung Squamous Cell Carcinoma- Not Otherwise Specified (NOS)	2010	[Not Available]	[Not Available]	RX	7th	T2b	N1	MX	Stage IIB	[Not Applicable]	[Not Applicable]	[Not Applicable]	[Not Applicable]	YES	76	[Not Available]	[Not Available]	[Not Available]	[Not Available]	[Not Available]	[Not Available]	[Not Available]	[Not Available]	[Not Available]	[Not Available]	[Not Available]	No	[Not Available]	4	1959	1995	Alive	36	[Not Available]	0	Preoperative
381edbe7-f391-4154-b16e-ac91d550582e	TCGA-43-6770	2011-08-24	Lung Squamous Cell Carcinoma	YES	NO	FEMALE	BLACK OR AFRICAN AMERICAN	NOT HISPANIC OR LATINO	[Not Available]	No	L-Upper	[Not Available]	Lung Squamous Cell Carcinoma- Not Otherwise Specified (NOS)	2011	[Not Available]	[Not Available]	RX	7th	T2a	N0	MX	Stage IB	[Not Applicable]	[Not Applicable]	[Not Applicable]	[Not Applicable]	YES	97	93	99	96	59	[Not Available]	[Not Available]	[Not Available]	[Not Available]	[Not Available]	[Not Available]	[Not Available]	No	[Not Available]	2	1977	[Not Available]	Alive	34	[Not Available]	[Not Available]	[Not Available]
b0818bee-c32c-405c-ba09-956091fbe09b	TCGA-43-6771	2011-08-26	Lung Squamous Cell Carcinoma	NO	YES	MALE	WHITE	[Not Available]	[Not Available]	No	L-Upper	[Not Available]	Lung Squamous Cell Carcinoma- Not Otherwise Specified (NOS)	2006	[Not Available]	[Not Available]	RX	6th	T2	N0	MX	Stage IB	[Not Applicable]	[Not Applicable]	[Not Applicable]	[Not Applicable]	YES	104	109	117	121	101	[Not Available]	[Not Available]	[Not Available]	[Not Available]	[Not Available]	[Not Available]	[Not Available]	No	[Not Available]	3	1936	1976	Dead	40	[Not Available]	[Not Available]	[Not Available]
a3583ffc-adb9-40f5-8ec5-8a4f6f432220	TCGA-43-6773	2011-10-11	Lung Squamous Cell Carcinoma	NO	YES	MALE	WHITE	[Not Available]	[Not Available]	No	R-Lower	[Not Available]	Lung Squamous Cell Carcinoma- Not Otherwise Specified (NOS)	2008	[Not Available]	[Not Available]	[Not Available]	6th	T2	N1	MX	Stage IIB	[Not Applicable]	[Not Applicable]	[Not Applicable]	[Not Applicable]	YES	65	70	[Not Available]	[Not Available]	84	[Not Available]	[Not Available]	[Not Available]	[Not Available]	[Not Available]	[Not Available]	[Not Available]	No	[Not Available]	3	[Not Available]	1988	Dead	[Not Available]	[Not Available]	[Not Available]	[Not Available]
9eb34055-0e33-4b3a-827b-d7108b5b0629	TCGA-43-7656	2011-12-29	Lung Squamous Cell Carcinoma	YES	NO	MALE	WHITE	NOT HISPANIC OR LATINO	[Not Available]	No	R-Lower	[Not Available]	Lung Squamous Cell Carcinoma- Not Otherwise Specified (NOS)	2011	[Not Available]	[Not Available]	[Not Available]	7th	T1b	N0	MX	Stage IA	[Not Applicable]	[Not Applicable]	[Not Applicable]	[Not Applicable]	[Not Available]	60	62	73	75	67	NO	[Not Available]	[Not Available]	[Not Available]	[Not Available]	[Not Available]	[Not Available]	No	[Not Available]	4	1956	[Not Available]	Alive	45	[Not Available]	0	Other
dbece124-c042-4adc-8136-90e7940ee6ad	TCGA-43-7657	2011-12-30	Lung Squamous Cell Carcinoma	YES	NO	FEMALE	WHITE	NOT HISPANIC OR LATINO	[Not Available]	Yes	R-Upper	[Not Available]	Lung Squamous Cell Carcinoma- Not Otherwise Specified (NOS)	2011	[Not Available]	[Not Available]	[Not Available]	7th	T1	N0	MX	Stage IA	[Not Applicable]	[Not Applicable]	[Not Applicable]	[Not Applicable]	YES	91	103	90	95	64	NO	[Not Available]	[Not Available]	[Not Available]	[Not Available]	[Not Available]	[Not Available]	No	[Not Available]	4	1957	2002	Alive	45	[Not Available]	[Not Available]	[Not Available]
a6ec75d4-1c90-4527-bfae-aa91d2dae082	TCGA-43-7658	2012-01-10	Lung Squamous Cell Carcinoma	NO	YES	FEMALE	WHITE	[Not Available]	[Not Available]	Yes	R-Upper	[Not Available]	Lung Squamous Cell Carcinoma- Not Otherwise Specified (NOS)	2006	[Not Available]	[Not Available]	[Not Available]	6th	T1	N0	M0	Stage IA	[Not Applicable]	[Not Applicable]	[Not Applicable]	[Not Applicable]	YES	[Not Available]	[Not Available]	[Not Available]	[Not Available]	[Not Available]	[Not Available]	[Not Available]	[Not Available]	[Not Available]	[Not Available]	[Not Available]	[Not Available]	No	[Not Available]	4	1970	1995	Alive	12	[Not Available]	0	Other
0e084325-ba97-4c0a-9d00-12d01b4bc0bb	TCGA-43-8115	2012-05-30	Lung Squamous Cell Carcinoma	YES	NO	FEMALE	WHITE	NOT HISPANIC OR LATINO	[Not Available]	No	L-Lower	[Not Available]	Lung Squamous Cell Carcinoma- Not Otherwise Specified (NOS)	2011	[Not Available]	[Not Available]	R0	7th	T2a	N1	MX	Stage IIA	[Not Applicable]	[Not Applicable]	[Not Applicable]	[Not Applicable]	YES	54	[Not Available]	66	[Not Available]	[Not Available]	[Unknown]	[Not Available]	[Not Available]	[Unknown]	[Not Available]	[Unknown]	[Not Available]	No	[Not Available]	4	1955	2011	Alive	55.83	[Not Available]	1	Preoperative
9b4c86f2-6811-4e11-8104-fc020edbe1e2	TCGA-43-8116	2012-05-31	Lung Squamous Cell Carcinoma	YES	NO	MALE	WHITE	NOT HISPANIC OR LATINO	[Not Available]	No	L-Upper	[Not Available]	Lung Squamous Cell Carcinoma- Not Otherwise Specified (NOS)	2011	[Not Available]	[Not Available]	[Not Available]	7th	T1b	N0	M0	Stage IA	[Not Applicable]	[Not Applicable]	[Not Applicable]	[Not Applicable]	YES	94	99	102	102	55	[Unknown]	[Not Available]	[Not Available]	[Unknown]	[Not Available]	[Unknown]	[Not Available]	No	[Not Available]	2	1959	[Not Available]	Alive	35	[Not Available]	1	Preoperative
ad98977b-e159-410a-b8c2-f4e8a07f9784	TCGA-43-8118	2012-11-02	Lung Squamous Cell Carcinoma	YES	NO	FEMALE	WHITE	NOT HISPANIC OR LATINO	[Not Available]	Yes, History of Synchronous/Bilateral Malignancy	R-Upper	[Not Available]	Lung Squamous Cell Carcinoma- Not Otherwise Specified (NOS)	2011	[Not Available]	[Not Available]	[Not Evaluated]	7th	T1b	N0	M0	Stage IA	[Not Applicable]	[Not Applicable]	[Not Applicable]	[Not Applicable]	YES	66	73	88	92	50	NO	[Not Available]	[Not Available]	NO	[Not Available]	NO	[Not Available]	No	[Not Available]	2	1971	[Not Available]	Dead	20	[Not Available]	1	Pre-Adjuvant Therapy
AE2C650C-600B-4C58-893B-7FD73D44AF47	TCGA-43-A474	2012-11-23	Lung Squamous Cell Carcinoma	YES	NO	MALE	WHITE	NOT HISPANIC OR LATINO	[Not Available]	Yes, History of Prior Malignancy	L-Upper	[Not Available]	Lung Squamous Cell Carcinoma- Not Otherwise Specified (NOS)	2012	[Not Available]	[Not Available]	R0	7th	T2b	N0	M0	Stage IIA	[Not Applicable]	[Not Applicable]	[Not Applicable]	[Not Applicable]	YES	66	82	79	83	73	[Not Available]	[Not Available]	[Not Available]	[Not Available]	[Not Available]	[Not Available]	[Not Available]	No	[Not Available]	4	1965	2012	Alive	47	90	[Not Available]	Post-Adjuvant Therapy
BA7B9B84-C227-4AD0-9E71-88EE3309162C	TCGA-43-A475	2012-11-26	Lung Squamous Cell Carcinoma	YES	NO	FEMALE	WHITE	NOT HISPANIC OR LATINO	[Not Available]	No	R-Upper	[Not Available]	Lung Squamous Cell Carcinoma- Not Otherwise Specified (NOS)	2012	[Not Available]	[Not Available]	R1	7th	T3	N0	M0	Stage IIB	[Not Applicable]	[Not Applicable]	[Not Applicable]	[Not Applicable]	YES	67	71	77	77	53	[Not Available]	[Not Available]	[Not Available]	[Not Available]	[Not Available]	[Not Available]	[Not Available]	No	[Not Available]	4	1958	2008	Alive	100	[Not Available]	0	Preoperative
4D6B5B30-0DEA-4745-BC46-34EBD98F7418	TCGA-43-A56U	2013-04-01	Lung Squamous Cell Carcinoma	YES	NO	FEMALE	WHITE	NOT HISPANIC OR LATINO	[Not Available]	No	L-Upper	[Not Available]	Lung Squamous Cell Carcinoma- Not Otherwise Specified (NOS)	2012	[Not Available]	[Not Available]	R0	7th	T1b	N0	MX	Stage IA	[Not Applicable]	[Not Applicable]	[Not Applicable]	[Not Applicable]	YES	85	89	92	96	75	[Not Available]	[Not Available]	[Not Available]	[Not Available]	[Not Available]	[Not Available]	[Not Available]	No	[Not Available]	4	1971	2012	Alive	20.5	[Not Available]	0	Preoperative
BB2A7057-6DF5-4EB9-AD0F-9AC47314889E	TCGA-43-A56V	2013-04-04	Lung Squamous Cell Carcinoma	YES	NO	MALE	BLACK OR AFRICAN AMERICAN	NOT HISPANIC OR LATINO	[Not Available]	Yes, History of Synchronous/Bilateral Malignancy	R-Middle	[Not Available]	Lung Squamous Cell Carcinoma- Not Otherwise Specified (NOS)	2012	[Not Available]	[Not Available]	[Not Available]	7th	T2a	N2	M0	Stage IIIA	[Not Applicable]	[Not Applicable]	[Not Applicable]	[Not Applicable]	YES	78	76	97	97	58	[Not Available]	[Not Available]	[Not Available]	[Not Available]	[Not Available]	[Not Available]	[Not Available]	No	[Not Available]	4	1967	1999	Alive	48	80	[Not Available]	Post-Adjuvant Therapy
ec10dc91-2743-4e0c-af77-2f0105bf6a9e	TCGA-46-3765	2010-12-00	Lung Squamous Cell Carcinoma	YES	NO	FEMALE	WHITE	NOT HISPANIC OR LATINO	[Not Available]	No	R-Upper	Central Lung	Lung Squamous Cell Carcinoma- Not Otherwise Specified (NOS)	2009	[Not Available]	[Not Available]	R0	[Not Available]	T1	N0	M0	Stage IA	[Not Applicable]	[Not Applicable]	[Not Applicable]	[Not Applicable]	[Not Available]	[Not Available]	[Not Available]	[Not Available]	[Not Available]	[Not Available]	NO	[Not Available]	[Not Available]	NO	[Not Available]	NO	[Not Available]	No	[Not Available]	2	[Not Available]	[Not Available]	Alive	[Not Available]	[Not Available]	[Not Available]	[Not Available]
ec260f86-7186-4bf2-9de9-320b4ca155a4	TCGA-46-3766	2010-12-00	Lung Squamous Cell Carcinoma	YES	NO	FEMALE	WHITE	NOT HISPANIC OR LATINO	[Not Available]	No	R-Lower	Central Lung	Lung Squamous Cell Carcinoma- Not Otherwise Specified (NOS)	2009	[Not Available]	[Not Available]	R0	[Not Available]	T1	N0	M0	Stage IA	[Not Applicable]	[Not Applicable]	[Not Applicable]	[Not Applicable]	[Not Available]	[Not Available]	[Not Available]	[Not Available]	[Not Available]	[Not Available]	NO	[Not Available]	[Not Available]	NO	[Not Available]	NO	[Not Available]	No	[Not Available]	4	[Not Available]	[Not Available]	Alive	[Not Available]	[Not Available]	[Not Available]	[Not Available]
6b0b6fc0-d808-49c3-8f2a-e122bc3142f5	TCGA-46-3767	2010-12-00	Lung Squamous Cell Carcinoma	YES	NO	MALE	WHITE	NOT HISPANIC OR LATINO	[Not Available]	No	L-Lower	Central Lung	Lung Squamous Cell Carcinoma- Not Otherwise Specified (NOS)	2009	[Not Available]	[Not Available]	R0	[Not Available]	T1a	N0	M0	Stage IA	[Not Applicable]	[Not Applicable]	[Not Applicable]	[Not Applicable]	[Not Available]	[Not Available]	[Not Available]	[Not Available]	[Not Available]	[Not Available]	NO	[Not Available]	[Not Available]	NO	[Not Available]	NO	[Not Available]	No	[Not Available]	3	[Not Available]	[Not Available]	Alive	[Not Available]	[Not Available]	[Not Available]	[Not Available]
a402e786-132c-4095-bb75-22be04b5d835	TCGA-46-3768	2010-12-00	Lung Squamous Cell Carcinoma	YES	NO	MALE	WHITE	NOT HISPANIC OR LATINO	[Not Available]	No	L-Upper	Central Lung	Lung Squamous Cell Carcinoma- Not Otherwise Specified (NOS)	2010	[Not Available]	[Not Available]	R0	[Not Available]	T3	N1	M0	Stage IIIA	[Not Applicable]	[Not Applicable]	[Not Applicable]	[Not Applicable]	[Not Available]	[Not Available]	[Not Available]	[Not Available]	[Not Available]	[Not Available]	NO	[Not Available]	[Not Available]	NO	[Not Available]	NO	[Not Available]	No	[Not Available]	4	[Not Available]	[Not Available]	Dead	[Not Available]	[Not Available]	[Not Available]	[Not Available]
d38dbe20-bd5a-45d5-8db3-d5f777b454b6	TCGA-46-3769	2010-12-00	Lung Squamous Cell Carcinoma	YES	NO	MALE	WHITE	NOT HISPANIC OR LATINO	[Not Available]	No	R-Upper	Central Lung	Lung Squamous Cell Carcinoma- Not Otherwise Specified (NOS)	2009	[Not Available]	[Not Available]	R1	[Not Available]	T4	N0	M0	[Discrepancy]	[Not Applicable]	[Not Applicable]	[Not Applicable]	[Not Applicable]	[Not Available]	[Not Available]	[Not Available]	[Not Available]	[Not Available]	[Not Available]	NO	[Not Available]	[Not Available]	YES	[Not Available]	NO	[Not Available]	No	[Not Available]	4	[Not Available]	[Not Available]	Alive	[Not Available]	[Not Available]	[Not Available]	[Not Available]
6020ec67-8f3b-409f-a0ed-2af849b4d76f	TCGA-46-6025	2011-06-01	Lung Squamous Cell Carcinoma	YES	NO	MALE	WHITE	NOT HISPANIC OR LATINO	[Not Available]	No	R-Lower	Central Lung	Lung Squamous Cell Carcinoma- Not Otherwise Specified (NOS)	2010	[Not Available]	[Not Available]	R0	[Not Available]	T2b	N1	M0	Stage IIB	[Not Applicable]	[Not Applicable]	[Not Applicable]	[Not Applicable]	[Not Available]	[Not Available]	[Not Available]	[Not Available]	[Not Available]	[Not Available]	NO	[Not Available]	[Not Available]	NO	[Not Available]	NO	[Not Available]	No	[Not Available]	4	[Not Available]	2010	Alive	[Not Available]	[Not Available]	1	Post-Adjuvant Therapy
e8bc2eea-dc6e-420b-abe8-e36989e75df8	TCGA-46-6026	2011-06-01	Lung Squamous Cell Carcinoma	YES	NO	MALE	WHITE	NOT HISPANIC OR LATINO	[Not Available]	No	R-Lower	Central Lung	Lung Squamous Cell Carcinoma- Not Otherwise Specified (NOS)	2010	[Not Available]	[Not Available]	R2	[Not Available]	T2a	N1	M0	Stage IIB	[Not Applicable]	[Not Applicable]	[Not Applicable]	[Not Applicable]	[Not Available]	[Not Available]	[Not Available]	[Not Available]	[Not Available]	[Not Available]	NO	[Not Available]	[Not Available]	NO	[Not Available]	NO	[Not Available]	No	[Not Available]	3	[Not Available]	1985	Alive	[Not Available]	[Not Available]	3	Post-Adjuvant Therapy
2f586b38-5be6-4ffa-8a0f-c870fdf3dad3	TCGA-51-4079	2010-12-07	Lung Squamous Cell Carcinoma	NO	YES	FEMALE	BLACK OR AFRICAN AMERICAN	NOT HISPANIC OR LATINO	[Not Available]	No	R-Upper	Central Lung	Lung Squamous Cell Carcinoma- Not Otherwise Specified (NOS)	2009	[Not Available]	[Not Available]	R0	6th	T2	N0	[Not Available]	Stage IB	[Not Applicable]	[Not Applicable]	[Not Applicable]	[Not Applicable]	[Not Available]	[Not Available]	[Not Available]	[Not Available]	[Not Available]	[Not Available]	NO	[Not Available]	[Not Available]	NO	[Not Available]	NO	[Not Available]	No	[Not Available]	4	[Not Available]	2007	Dead	25	[Not Available]	[Not Available]	[Not Available]
8479ec58-f5e7-4d9d-a382-2688ed93ca8e	TCGA-51-4080	2010-12-07	Lung Squamous Cell Carcinoma	NO	YES	MALE	BLACK OR AFRICAN AMERICAN	NOT HISPANIC OR LATINO	[Not Available]	No	R-Upper	Central Lung	Lung Basaloid Squamous Cell Carcinoma	2009	[Not Available]	[Not Available]	R0	[Not Available]	T4	N1	[Not Available]	Stage IIIB	[Not Applicable]	[Not Applicable]	[Not Applicable]	[Not Applicable]	[Not Available]	[Not Available]	[Not Available]	[Not Available]	[Not Available]	[Not Available]	NO	[Not Available]	[Not Available]	NO	[Not Available]	NO	[Not Available]	No	[Not Available]	4	[Not Available]	2005	Dead	[Not Available]	[Not Available]	[Not Available]	[Not Available]
3f43c83e-c2a2-4224-9da0-0757b9c7d4ca	TCGA-51-4081	2010-12-07	Lung Squamous Cell Carcinoma	NO	YES	MALE	WHITE	NOT HISPANIC OR LATINO	[Not Available]	No	R-Upper	Central Lung	Lung Squamous Cell Carcinoma- Not Otherwise Specified (NOS)	2009	[Not Available]	[Not Available]	R0	[Not Available]	T2a	N1	M0	Stage IIB	[Not Applicable]	[Not Applicable]	[Not Applicable]	[Not Applicable]	[Not Available]	[Not Available]	[Not Available]	[Not Available]	[Not Available]	[Not Available]	NO	[Not Available]	[Not Available]	NO	[Not Available]	NO	[Not Available]	No	[Not Available]	2	[Not Available]	[Not Available]	Alive	80	[Not Available]	[Not Available]	[Not Available]
3b195845-0050-49cb-b639-1fe85a131ebe	TCGA-51-6867	2011-10-10	Lung Squamous Cell Carcinoma	NO	YES	FEMALE	WHITE	NOT HISPANIC OR LATINO	[Not Available]	Yes	R-Upper	Peripheral Lung	Lung Squamous Cell Carcinoma- Not Otherwise Specified (NOS)	2003	[Not Available]	[Not Available]	R0	6th	T1	N0	M0	Stage I	[Not Applicable]	[Not Applicable]	[Not Applicable]	[Not Applicable]	[Not Available]	[Not Available]	[Not Available]	[Not Available]	[Not Available]	[Not Available]	NO	[Not Available]	[Not Available]	NO	[Not Available]	[Not Available]	[Not Available]	No	[Not Available]	4	[Not Available]	2002	Dead	40	[Not Available]	[Not Available]	[Not Available]
3a756d00-b24a-4646-ae1a-587bd141fc05	TCGA-52-7622	2011-12-13	Lung Squamous Cell Carcinoma	NO	YES	FEMALE	WHITE	HISPANIC OR LATINO	[Not Available]	No	R-Lower	Central Lung	Lung Squamous Cell Carcinoma- Not Otherwise Specified (NOS)	2010	[Not Available]	[Not Available]	R0	7th	T1a	N0	M0	Stage IA	[Not Applicable]	[Not Applicable]	[Not Applicable]	[Not Applicable]	YES	90	91	67	69	88	NO	[Not Available]	[Not Available]	NO	[Not Available]	NO	[Not Available]	No	[Not Available]	4	1965	2010	Alive	22	[Not Available]	1	Pre-Adjuvant Therapy
72c49014-f949-4d02-ae71-26a243e0b102	TCGA-52-7809	2012-03-14	Lung Squamous Cell Carcinoma	NO	YES	MALE	WHITE	NOT HISPANIC OR LATINO	[Not Available]	No	R-Upper	Peripheral Lung	Lung Basaloid Squamous Cell Carcinoma	2009	[Not Available]	[Not Available]	R0	6th	T2	N0	M0	Stage IB	[Not Applicable]	[Not Applicable]	[Not Applicable]	[Not Applicable]	NO	[Not Available]	[Not Available]	[Not Available]	[Not Available]	[Not Available]	NO	[Not Available]	[Not Available]	NO	[Not Available]	NO	[Not Available]	No	[Not Available]	2	1948	[Not Available]	Dead	60	[Not Available]	[Not Available]	[Not Available]
98b86f94-9ede-45ab-ba09-19a6ec6d9494	TCGA-52-7810	2012-03-14	Lung Squamous Cell Carcinoma	NO	YES	FEMALE	WHITE	NOT HISPANIC OR LATINO	[Not Available]	No	R-Upper	[Not Available]	Lung Squamous Cell Carcinoma- Not Otherwise Specified (NOS)	2008	[Not Available]	[Not Available]	[Not Available]	6th	T3	N0	M0	Stage IIB	[Not Applicable]	[Not Applicable]	[Not Applicable]	[Not Applicable]	NO	[Not Available]	[Not Available]	[Not Available]	[Not Available]	[Not Available]	NO	[Not Available]	[Not Available]	NO	[Not Available]	NO	[Not Available]	No	[Not Available]	3	1970	1990	Alive	20	90	[Not Available]	Pre-Adjuvant Therapy
0f5cebb3-a37b-471f-bbd3-b03ce171812a	TCGA-52-7811	2012-03-14	Lung Squamous Cell Carcinoma	NO	YES	MALE	WHITE	HISPANIC OR LATINO	[Not Available]	No	L-Lower	[Not Available]	Lung Squamous Cell Carcinoma- Not Otherwise Specified (NOS)	2009	[Not Available]	[Not Available]	R0	6th	T2	N0	M0	Stage IB	[Not Applicable]	[Not Applicable]	[Not Applicable]	[Not Applicable]	YES	90	90	66	66	84	NO	[Not Available]	[Not Available]	NO	[Not Available]	NO	[Not Available]	No	[Not Available]	2	1958	[Not Available]	Dead	50	[Not Available]	0	Pre-Adjuvant Therapy
81b7cbc1-c037-426f-95b0-d729a30697da	TCGA-52-7812	2012-03-14	Lung Squamous Cell Carcinoma	NO	YES	MALE	WHITE	HISPANIC OR LATINO	[Not Available]	No	L-Upper	Central Lung	Lung Squamous Cell Carcinoma- Not Otherwise Specified (NOS)	2009	[Not Available]	[Not Available]	R0	6th	T2	N2	M0	[Discrepancy]	[Not Applicable]	[Not Applicable]	[Not Applicable]	[Not Applicable]	NO	[Not Available]	[Not Available]	[Not Available]	[Not Available]	[Not Available]	NO	[Not Available]	[Not Available]	NO	[Not Available]	NO	[Not Available]	No	[Not Available]	4	1967	1997	Dead	30	[Not Available]	1	Preoperative
3edf933a-be1a-46e8-bfb0-acdff30e64a0	TCGA-56-1622	2010-02-03	Lung Squamous Cell Carcinoma	YES	NO	MALE	WHITE	NOT HISPANIC OR LATINO	[Not Available]	No	R-Lower	[Not Available]	Lung Squamous Cell Carcinoma- Not Otherwise Specified (NOS)	2007	[Not Available]	[Not Available]	R0	[Not Available]	T2	N0	M0	Stage IB	[Not Applicable]	[Not Applicable]	[Not Applicable]	[Not Applicable]	[Not Available]	[Not Available]	[Not Available]	[Not Available]	[Not Available]	[Not Available]	[Not Available]	[Not Available]	[Not Available]	[Not Available]	[Not Available]	[Not Available]	[Not Available]	No	[Not Available]	4	1962	2006	Dead	86	[Not Available]	[Not Available]	[Not Available]
b3a6edcd-6592-44fb-9ec1-037138bfbdaf	TCGA-56-5897	2010-09-16	Lung Squamous Cell Carcinoma	NO	YES	MALE	WHITE	NOT HISPANIC OR LATINO	[Not Available]	No	R-Upper	[Not Available]	Lung Squamous Cell Carcinoma- Not Otherwise Specified (NOS)	2010	[Not Available]	[Not Available]	[Not Available]	7th	T1b	N0	MX	Stage IA	[Not Applicable]	[Not Applicable]	[Not Applicable]	[Not Applicable]	[Not Available]	[Not Available]	[Not Available]	[Not Available]	[Not Available]	[Not Available]	[Not Available]	[Not Available]	[Not Available]	[Not Available]	[Not Available]	[Not Available]	[Not Available]	No	[Not Available]	3	[Not Available]	1983	Alive	[Not Available]	[Not Available]	[Not Available]	[Not Available]
6467bc69-4e89-49f6-8912-fa86d513cf51	TCGA-56-5898	2010-07-12	Lung Squamous Cell Carcinoma	NO	YES	MALE	WHITE	NOT HISPANIC OR LATINO	[Not Available]	No	R-Upper	[Not Available]	Lung Squamous Cell Carcinoma- Not Otherwise Specified (NOS)	2010	[Not Available]	[Not Available]	R0	7th	T1b	N0	M0	Stage IA	[Not Applicable]	[Not Applicable]	[Not Applicable]	[Not Applicable]	NO	[Not Available]	[Not Available]	[Not Available]	[Not Available]	[Not Available]	[Not Available]	[Not Available]	[Not Available]	[Not Available]	[Not Available]	[Not Available]	[Not Available]	No	[Not Available]	2	1955	[Not Available]	Alive	[Not Available]	[Not Available]	[Not Available]	[Not Available]
af02050f-ebc4-4171-b63b-3b3faa279f2b	TCGA-56-6545	2011-07-22	Lung Squamous Cell Carcinoma	YES	NO	FEMALE	WHITE	[Not Available]	[Not Available]	No	R-Upper	[Not Available]	Lung Squamous Cell Carcinoma- Not Otherwise Specified (NOS)	2010	[Not Available]	[Not Available]	R0	7th	T2a	N0	M0	Stage IB	[Not Applicable]	[Not Applicable]	[Not Applicable]	[Not Applicable]	[Not Available]	[Not Available]	[Not Available]	[Not Available]	[Not Available]	[Not Available]	[Not Available]	[Not Available]	[Not Available]	[Not Available]	[Not Available]	[Not Available]	[Not Available]	No	[Not Available]	4	1952	1996	Alive	[Not Available]	[Not Available]	[Not Available]	[Not Available]
d566fa32-382b-499c-820a-c2bbb22501fb	TCGA-56-6546	2011-07-19	Lung Squamous Cell Carcinoma	YES	NO	MALE	WHITE	NOT HISPANIC OR LATINO	[Not Available]	No	R-Upper	[Not Available]	Lung Squamous Cell Carcinoma- Not Otherwise Specified (NOS)	2011	[Not Available]	[Not Available]	[Not Available]	7th	T2b	N0	MX	Stage IIA	[Not Applicable]	[Not Applicable]	[Not Applicable]	[Not Applicable]	YES	[Not Available]	[Not Available]	[Not Available]	[Not Available]	[Not Available]	[Not Available]	[Not Available]	[Not Available]	[Not Available]	[Not Available]	[Not Available]	[Not Available]	No	[Not Available]	4	1954	2011	Alive	[Not Available]	[Not Available]	[Not Available]	[Not Available]
1dba835e-cbe9-41e0-883d-50bf86bc7821	TCGA-56-7221	2011-10-06	Lung Squamous Cell Carcinoma	YES	NO	MALE	WHITE	[Not Available]	[Not Available]	Yes	R-Lower	[Not Available]	Lung Squamous Cell Carcinoma- Not Otherwise Specified (NOS)	2011	[Not Available]	[Not Available]	R0	7th	T2	N0	M0	Stage IB	[Not Applicable]	[Not Applicable]	[Not Applicable]	[Not Applicable]	[Not Available]	[Not Available]	[Not Available]	[Not Available]	[Not Available]	[Not Available]	[Not Available]	[Not Available]	[Not Available]	[Not Available]	[Not Available]	[Not Available]	[Not Available]	No	[Not Available]	3	[Not Available]	1982	Alive	25	[Not Available]	[Not Available]	[Not Available]
3768cf73-e389-449a-bde3-29eb20c9e249	TCGA-56-7222	2011-10-06	Lung Squamous Cell Carcinoma	YES	NO	MALE	WHITE	NOT HISPANIC OR LATINO	[Not Available]	No	R-Upper	Central Lung	Lung Squamous Cell Carcinoma- Not Otherwise Specified (NOS)	2011	[Not Available]	[Not Available]	[Not Available]	7th	T2a	N0	M0	Stage IB	[Not Applicable]	[Not Applicable]	[Not Applicable]	[Not Applicable]	YES	58	64	95	97	62	NO	[Not Available]	[Not Available]	NO	[Not Available]	NO	[Not Available]	No	[Not Available]	2	1963	[Not Available]	Alive	23	70	3	Preoperative
38007506-4865-41d4-83a9-1aa13648f459	TCGA-56-7223	2011-10-06	Lung Squamous Cell Carcinoma	YES	NO	MALE	WHITE	NOT HISPANIC OR LATINO	[Not Available]	No	R-Lower	[Not Available]	Lung Squamous Cell Carcinoma- Not Otherwise Specified (NOS)	2011	[Not Available]	[Not Available]	R0	7th	T3	N1	MX	Stage IIIA	[Not Applicable]	[Not Applicable]	[Not Applicable]	[Not Applicable]	[Not Available]	[Not Available]	[Not Available]	[Not Available]	[Not Available]	[Not Available]	[Not Available]	[Not Available]	[Not Available]	[Not Available]	[Not Available]	[Not Available]	[Not Available]	No	[Not Available]	4	[Not Available]	2011	Alive	[Not Available]	[Not Available]	[Not Available]	[Not Available]
1ccd29c1-cf30-4701-9b50-5d34cae2f4b3	TCGA-56-7579	2012-01-11	Lung Squamous Cell Carcinoma	YES	NO	MALE	WHITE	NOT HISPANIC OR LATINO	[Not Available]	No	L-Upper	[Not Available]	Lung Squamous Cell Carcinoma- Not Otherwise Specified (NOS)	2011	[Not Available]	[Not Available]	R0	7th	T3	N1	M0	Stage IIIA	[Not Applicable]	[Not Applicable]	[Not Applicable]	[Not Applicable]	[Not Available]	[Not Available]	[Not Available]	[Not Available]	[Not Available]	[Not Available]	[Not Available]	[Not Available]	[Not Available]	[Not Available]	[Not Available]	[Not Available]	[Not Available]	No	[Not Available]	4	1986	2003	Alive	2	[Not Available]	[Not Available]	[Not Available]
cf9d5813-da70-4d7f-8185-d29d1b86b578	TCGA-56-7580	2012-01-11	Lung Squamous Cell Carcinoma	YES	NO	MALE	WHITE	NOT HISPANIC OR LATINO	[Not Available]	No	L-Lower	[Not Available]	Lung Squamous Cell Carcinoma- Not Otherwise Specified (NOS)	2011	[Not Available]	[Not Available]	R0	7th	T2a	N0	M0	Stage IB	[Not Applicable]	[Not Applicable]	[Not Applicable]	[Not Applicable]	[Not Available]	[Not Available]	[Not Available]	[Not Available]	[Not Available]	[Not Available]	[Not Available]	[Not Available]	[Not Available]	[Not Available]	[Not Available]	[Not Available]	[Not Available]	No	[Not Available]	3	1947	1985	Alive	[Not Available]	[Not Available]	[Not Available]	[Not Available]
b5e2cbda-bbfa-4ef8-a9c4-cb978bef9b23	TCGA-56-7582	2012-01-11	Lung Squamous Cell Carcinoma	YES	NO	MALE	WHITE	NOT HISPANIC OR LATINO	[Not Available]	No	R-Lower	[Not Available]	Lung Squamous Cell Carcinoma- Not Otherwise Specified (NOS)	2011	[Not Available]	[Not Available]	R0	7th	T2a	N0	M0	Stage IB	[Not Applicable]	[Not Applicable]	[Not Applicable]	[Not Applicable]	[Not Available]	[Not Available]	[Not Available]	[Not Available]	[Not Available]	[Not Available]	[Not Available]	[Not Available]	[Not Available]	[Not Available]	[Not Available]	[Not Available]	[Not Available]	No	[Not Available]	3	[Not Available]	1995	Alive	[Not Available]	[Not Available]	[Not Available]	[Not Available]
8bb3ed57-6e48-4c90-bcf2-baf9a843398f	TCGA-56-7730	2012-03-09	Lung Squamous Cell Carcinoma	YES	NO	MALE	WHITE	NOT HISPANIC OR LATINO	[Not Available]	No	R-Upper	Peripheral Lung	Lung Squamous Cell Carcinoma- Not Otherwise Specified (NOS)	2011	[Not Available]	[Not Available]	R1	7th	T2b	N0	M0	Stage IIA	[Not Applicable]	[Not Applicable]	[Not Applicable]	[Not Applicable]	YES	72	76	[Not Available]	[Not Available]	59	NO	[Not Available]	[Not Available]	[Not Available]	[Not Available]	[Not Available]	[Not Available]	No	[Not Available]	2	[Not Available]	[Not Available]	Alive	[Not Available]	[Not Available]	[Not Available]	[Not Available]
c32e04c5-2760-4a11-a7a9-ded1f4eb3a8c	TCGA-56-7731	2012-03-08	Lung Squamous Cell Carcinoma	YES	NO	FEMALE	WHITE	NOT HISPANIC OR LATINO	[Not Available]	No	R-Upper	[Not Available]	Lung Squamous Cell Carcinoma- Not Otherwise Specified (NOS)	2011	[Not Available]	[Not Available]	[Not Available]	7th	T2a	N0	MX	Stage IB	[Not Applicable]	[Not Applicable]	[Not Applicable]	[Not Applicable]	YES	64	67	71	71	59	[Not Available]	[Not Available]	[Not Available]	[Not Available]	[Not Available]	[Not Available]	[Not Available]	No	[Not Available]	4	1961	2011	Alive	100	[Not Available]	[Not Available]	[Not Available]
f1aa75c3-13f3-4bd9-9e51-923c2f62c2f7	TCGA-56-7822	2012-03-09	Lung Squamous Cell Carcinoma	YES	NO	MALE	BLACK OR AFRICAN AMERICAN	NOT HISPANIC OR LATINO	[Not Available]	No	R-Upper	[Not Available]	Lung Squamous Cell Carcinoma- Not Otherwise Specified (NOS)	2011	[Not Available]	[Not Available]	R0	7th	T2b	N1	M0	Stage IIB	[Not Applicable]	[Not Applicable]	[Not Applicable]	[Not Applicable]	YES	91	86	93	91	42	[Not Available]	[Not Available]	[Not Available]	[Not Available]	[Not Available]	[Not Available]	[Not Available]	No	[Not Available]	4	[Not Available]	2011	Alive	60	80	1	Preoperative
7b236171-2e7a-4018-b297-560ea8279ec0	TCGA-56-7823	2012-06-19	Lung Squamous Cell Carcinoma	YES	NO	FEMALE	WHITE	NOT HISPANIC OR LATINO	[Not Available]	No	R-Upper	[Not Available]	Lung Squamous Cell Carcinoma- Not Otherwise Specified (NOS)	2011	[Not Available]	[Not Available]	[Not Available]	7th	T1b	N1	M0	Stage IIA	[Not Applicable]	[Not Applicable]	[Not Applicable]	[Not Applicable]	YES	73	76	78	69	43	NO	[Not Available]	[Not Available]	[Not Available]	[Not Available]	[Not Available]	[Not Available]	No	[Not Available]	4	1968	2008	Alive	80	[Not Available]	[Not Available]	[Not Available]
0e91d7b5-ce35-4671-ab9f-cfd5369b557c	TCGA-56-8082	2012-07-08	Lung Squamous Cell Carcinoma	YES	NO	FEMALE	WHITE	NOT HISPANIC OR LATINO	[Not Available]	No	R-Lower	[Unknown]	Lung Squamous Cell Carcinoma- Not Otherwise Specified (NOS)	2011	[Not Available]	[Not Available]	R0	7th	T2b	N0	MX	Stage IIA	[Not Applicable]	[Not Applicable]	[Not Applicable]	[Not Applicable]	[Not Available]	[Not Available]	[Not Available]	[Not Available]	[Not Available]	[Not Available]	[Unknown]	[Not Available]	[Not Available]	[Unknown]	[Not Available]	[Unknown]	[Not Available]	No	[Not Available]	3	[Not Available]	[Not Available]	Alive	[Not Available]	[Unknown]	[Unknown]	[Unknown]
3d5a904a-3834-45bf-9212-c06d46d917f9	TCGA-56-8083	2012-07-08	Lung Squamous Cell Carcinoma	YES	NO	MALE	WHITE	NOT HISPANIC OR LATINO	[Not Available]	No	L-Upper	[Unknown]	Lung Squamous Cell Carcinoma- Not Otherwise Specified (NOS)	2011	[Not Available]	[Not Available]	R0	7th	T2a	N0	MX	Stage IB	[Not Applicable]	[Not Applicable]	[Not Applicable]	[Not Applicable]	YES	83	[Not Available]	109	[Not Available]	95	[Unknown]	[Not Available]	[Not Available]	[Unknown]	[Not Available]	[Unknown]	[Not Available]	No	[Not Available]	4	[Not Available]	2000	Alive	30	[Unknown]	[Unknown]	[Unknown]
2f39441b-e69f-488c-b5d0-cbd88447ad60	TCGA-56-8201	2012-07-08	Lung Squamous Cell Carcinoma	YES	NO	MALE	WHITE	NOT HISPANIC OR LATINO	[Not Available]	Yes, History of Prior Malignancy	R-Upper	[Unknown]	Lung Squamous Cell Carcinoma- Not Otherwise Specified (NOS)	2011	[Not Available]	[Not Available]	R0	7th	T3	N0	MX	Stage IIB	[Not Applicable]	[Not Applicable]	[Not Applicable]	[Not Applicable]	[Not Available]	[Not Available]	[Not Available]	[Not Available]	[Not Available]	[Not Available]	[Unknown]	[Not Available]	[Not Available]	[Unknown]	[Not Available]	[Unknown]	[Not Available]	No	[Not Available]	4	[Not Available]	[Not Available]	Alive	[Not Available]	[Unknown]	[Unknown]	[Unknown]
861d45aa-b15d-4e7e-b751-f55a64c4cac3	TCGA-56-8304	2012-12-03	Lung Squamous Cell Carcinoma	YES	NO	FEMALE	WHITE	[Unknown]	[Not Available]	No	R-Upper	[Unknown]	Lung Squamous Cell Carcinoma- Not Otherwise Specified (NOS)	2011	[Not Available]	[Not Available]	R0	7th	T1b	N0	MX	Stage IA	[Not Applicable]	[Not Applicable]	[Not Applicable]	[Not Applicable]	[Not Available]	[Not Available]	[Not Available]	[Not Available]	[Not Available]	[Not Available]	[Unknown]	[Not Available]	[Not Available]	[Unknown]	[Not Available]	[Unknown]	[Not Available]	No	[Not Available]	2	1953	[Not Available]	Alive	58	[Not Available]	[Not Available]	[Not Available]
d5e94dcf-994f-48a0-b491-bbbf1c2a6783	TCGA-56-8305	2012-09-28	Lung Squamous Cell Carcinoma	YES	NO	MALE	WHITE	NOT HISPANIC OR LATINO	[Not Available]	Yes, History of Prior Malignancy	R-Upper	[Unknown]	Lung Squamous Cell Carcinoma- Not Otherwise Specified (NOS)	2011	[Not Available]	[Not Available]	R0	7th	T2a	N0	M0	Stage IB	[Not Applicable]	[Not Applicable]	[Not Applicable]	[Not Applicable]	YES	63	70	55	56	49	[Unknown]	[Not Available]	[Not Available]	[Unknown]	[Not Available]	[Unknown]	[Not Available]	No	[Not Available]	3	1946	1996	Alive	100	[Unknown]	[Unknown]	[Unknown]
b9817e22-ec5f-4a66-bf24-0f9fd9d3231e	TCGA-56-8307	2012-09-28	Lung Squamous Cell Carcinoma	YES	NO	FEMALE	WHITE	NOT HISPANIC OR LATINO	[Not Available]	No	R-Lower	[Unknown]	Lung Squamous Cell Carcinoma- Not Otherwise Specified (NOS)	2012	[Not Available]	[Not Available]	R0	7th	T3	N0	M0	Stage IIB	[Not Applicable]	[Not Applicable]	[Not Applicable]	[Not Applicable]	YES	69	[Not Available]	85	[Not Available]	51	[Unknown]	[Not Available]	[Not Available]	[Unknown]	[Not Available]	[Unknown]	[Not Available]	No	[Not Available]	2	1977	[Not Available]	Alive	35	[Not Available]	[Not Available]	[Not Available]
399c936e-ba68-4040-98d4-917a87dad603	TCGA-56-8308	2012-10-08	Lung Squamous Cell Carcinoma	YES	NO	MALE	WHITE	NOT HISPANIC OR LATINO	[Not Available]	Yes, History of Prior Malignancy	L-Upper	[Unknown]	Lung Squamous Cell Carcinoma- Not Otherwise Specified (NOS)	2012	[Not Available]	[Not Available]	R1	7th	T3	N0	MX	Stage IIB	[Not Applicable]	[Not Applicable]	[Not Applicable]	[Not Applicable]	YES	81	88	81	84	42	[Not Available]	[Not Available]	[Not Available]	[Not Available]	[Not Available]	[Not Available]	[Not Available]	No	[Not Available]	3	1967	1992	Alive	63	[Not Available]	[Not Available]	[Not Available]
fa019da0-068c-4d28-a8f6-28b8e79f3a5a	TCGA-56-8309	2012-10-04	Lung Squamous Cell Carcinoma	YES	NO	MALE	WHITE	NOT HISPANIC OR LATINO	[Not Available]	No	R-Lower	[Unknown]	Lung Squamous Cell Carcinoma- Not Otherwise Specified (NOS)	2012	[Not Available]	[Not Available]	R0	7th	T1b	N0	MX	Stage IA	[Not Applicable]	[Not Applicable]	[Not Applicable]	[Not Applicable]	[Not Available]	[Not Available]	[Not Available]	[Not Available]	[Not Available]	[Not Available]	[Not Available]	[Not Available]	[Not Available]	[Not Available]	[Not Available]	[Not Available]	[Not Available]	No	[Not Available]	2	[Not Available]	[Not Available]	Alive	50	[Not Available]	[Not Available]	[Not Available]
ac274a44-de25-4bc6-8699-472576892c62	TCGA-56-8503	2012-12-28	Lung Squamous Cell Carcinoma	YES	NO	FEMALE	WHITE	NOT HISPANIC OR LATINO	[Not Available]	No	R-Lower	Peripheral Lung	Lung Squamous Cell Carcinoma- Not Otherwise Specified (NOS)	2012	[Not Available]	[Not Available]	R0	7th	T3	N0	M0	Stage IIB	[Not Applicable]	[Not Applicable]	[Not Applicable]	[Not Applicable]	[Not Available]	[Not Available]	[Not Available]	[Not Available]	[Not Available]	[Not Available]	[Unknown]	[Not Available]	[Not Available]	[Unknown]	[Not Available]	[Unknown]	[Not Available]	No	[Not Available]	2	1951	[Not Available]	Alive	91	[Not Evaluated]	[Not Evaluated]	[Not Evaluated]
9ee64a87-7224-461c-94da-29710d73164f	TCGA-56-8504	2013-01-11	Lung Squamous Cell Carcinoma	YES	NO	MALE	WHITE	NOT HISPANIC OR LATINO	[Not Available]	Yes, History of Prior Malignancy	L-Upper	[Unknown]	Lung Squamous Cell Carcinoma- Not Otherwise Specified (NOS)	2012	[Not Available]	[Not Available]	R0	7th	T2a	N0	MX	Stage IB	[Not Applicable]	[Not Applicable]	[Not Applicable]	[Not Applicable]	YES	65	65	80	82	[Not Available]	[Unknown]	[Not Available]	[Not Available]	[Unknown]	[Not Available]	[Unknown]	[Not Available]	No	[Not Available]	4	[Not Available]	2008	Alive	[Not Available]	[Not Evaluated]	[Not Evaluated]	[Not Available]
e731fed6-be23-4b19-8550-6e500613c468	TCGA-56-8622	2012-12-28	Lung Squamous Cell Carcinoma	YES	NO	MALE	WHITE	NOT HISPANIC OR LATINO	[Not Available]	No	R-Lower	[Unknown]	Lung Squamous Cell Carcinoma- Not Otherwise Specified (NOS)	2012	[Not Available]	[Not Available]	R0	7th	T2a	N0	M0	Stage IB	[Not Applicable]	[Not Applicable]	[Not Applicable]	[Not Applicable]	[Not Available]	[Not Available]	[Not Available]	[Not Available]	[Not Available]	[Not Available]	[Unknown]	[Not Available]	[Not Available]	[Unknown]	[Not Available]	[Unknown]	[Not Available]	No	[Not Available]	3	1984	2004	Alive	40	[Not Evaluated]	[Not Evaluated]	[Not Evaluated]
513c5f34-dc6e-4caa-81cc-907fd6a825b1	TCGA-56-8623	2012-12-28	Lung Squamous Cell Carcinoma	YES	NO	MALE	WHITE	NOT HISPANIC OR LATINO	[Not Available]	No	R-Upper	Peripheral Lung	Lung Squamous Cell Carcinoma- Not Otherwise Specified (NOS)	2012	[Not Available]	[Not Available]	R0	7th	T2a	N0	MX	Stage IB	[Not Applicable]	[Not Applicable]	[Not Applicable]	[Not Applicable]	[Not Available]	[Not Available]	[Not Available]	[Not Available]	[Not Available]	[Not Available]	[Unknown]	[Not Available]	[Not Available]	[Unknown]	[Not Available]	[Unknown]	[Not Available]	No	[Not Available]	2	[Not Available]	[Not Available]	Alive	45	90	0	Preoperative
2cc8743a-e759-4250-82be-893376933930	TCGA-56-8624	2013-01-11	Lung Squamous Cell Carcinoma	YES	NO	MALE	WHITE	NOT HISPANIC OR LATINO	[Not Available]	No	R-Lower	[Unknown]	Lung Squamous Cell Carcinoma- Not Otherwise Specified (NOS)	2012	[Not Available]	[Not Available]	R0	7th	T3	N0	MX	Stage IIB	[Not Applicable]	[Not Applicable]	[Not Applicable]	[Not Applicable]	YES	87	[Not Available]	[Not Available]	[Not Available]	84	[Unknown]	[Not Available]	[Not Available]	YES	[Not Available]	YES	[Not Available]	No	[Not Available]	3	[Not Available]	1952	Alive	20	[Not Evaluated]	[Not Evaluated]	[Not Available]
234c7de4-ce5b-4a2f-ac46-9da61cff1680	TCGA-56-8625	2012-12-28	Lung Squamous Cell Carcinoma	YES	NO	FEMALE	WHITE	NOT HISPANIC OR LATINO	[Not Available]	No	R-Lower	Peripheral Lung	Lung Squamous Cell Carcinoma- Not Otherwise Specified (NOS)	2012	[Not Available]	[Not Available]	RX	7th	T3	N1	MX	Stage IIIA	[Not Applicable]	[Not Applicable]	[Not Applicable]	[Not Applicable]	YES	48	52	61	58	31	[Unknown]	[Not Available]	[Not Available]	[Unknown]	[Not Available]	[Unknown]	[Not Available]	No	[Not Available]	2	[Not Available]	[Not Available]	Alive	[Not Available]	[Not Evaluated]	[Not Evaluated]	[Not Evaluated]
a4495428-39cc-49f6-bc41-1becdd94113f	TCGA-56-8626	2013-01-11	Lung Squamous Cell Carcinoma	YES	NO	MALE	WHITE	NOT HISPANIC OR LATINO	[Not Available]	No	L-Upper	[Unknown]	Lung Squamous Cell Carcinoma- Not Otherwise Specified (NOS)	2012	[Not Available]	[Not Available]	R0	7th	T1a	N0	MX	Stage IA	[Not Applicable]	[Not Applicable]	[Not Applicable]	[Not Applicable]	[Not Available]	[Not Available]	[Not Available]	[Not Available]	[Not Available]	[Not Available]	[Unknown]	[Not Available]	[Not Available]	[Unknown]	[Not Available]	[Unknown]	[Not Available]	No	[Not Available]	2	1962	[Not Available]	Alive	50	[Not Evaluated]	[Not Evaluated]	[Not Available]
20d3e9b8-c399-46d2-8367-c4e228cea17c	TCGA-56-8628	2013-01-11	Lung Squamous Cell Carcinoma	YES	NO	MALE	WHITE	NOT HISPANIC OR LATINO	[Not Available]	No	R-Upper	[Unknown]	Lung Squamous Cell Carcinoma- Not Otherwise Specified (NOS)	2012	[Not Available]	[Not Available]	R0	7th	T1b	N0	MX	Stage IA	[Not Applicable]	[Not Applicable]	[Not Applicable]	[Not Applicable]	[Not Available]	[Not Available]	[Not Available]	[Not Available]	[Not Available]	[Not Available]	[Unknown]	[Not Available]	[Not Available]	[Unknown]	[Not Available]	[Unknown]	[Not Available]	No	[Not Available]	4	[Not Available]	2007	Alive	[Not Available]	[Not Evaluated]	[Not Evaluated]	[Not Available]
1f084d72-fbf9-4787-b107-815b481b1a6e	TCGA-56-8629	2013-01-11	Lung Squamous Cell Carcinoma	YES	NO	MALE	WHITE	NOT HISPANIC OR LATINO	[Not Available]	No	L-Lower	[Unknown]	Lung Squamous Cell Carcinoma- Not Otherwise Specified (NOS)	2012	[Not Available]	[Not Available]	R0	7th	T2b	N0	MX	Stage IIA	[Not Applicable]	[Not Applicable]	[Not Applicable]	[Not Applicable]	YES	51	[Not Available]	98	[Not Available]	[Not Available]	NO	[Not Available]	[Not Available]	NO	[Not Available]	NO	[Not Available]	No	[Not Available]	4	1968	2001	Alive	66	80	1	Preoperative
1AEABF26-AC51-4173-AB8B-5D439CECA9F4	TCGA-56-A49D	2013-02-21	Lung Squamous Cell Carcinoma	YES	NO	MALE	WHITE	[Not Available]	[Not Available]	No	L-Upper	Central Lung	Lung Squamous Cell Carcinoma- Not Otherwise Specified (NOS)	2012	[Not Available]	[Not Available]	R0	7th	T2a	N2	MX	Stage IIIA	[Not Applicable]	[Not Applicable]	[Not Applicable]	[Not Applicable]	YES	72	[Not Available]	70	[Not Available]	64	[Unknown]	[Not Available]	[Not Available]	[Unknown]	[Not Available]	[Unknown]	[Not Available]	No	[Not Available]	4	1953	2005	Alive	53	[Not Evaluated]	[Not Evaluated]	[Not Evaluated]
B838706D-01E9-45AA-869D-A94168773BCD	TCGA-56-A4BW	2013-01-25	Lung Squamous Cell Carcinoma	YES	NO	MALE	WHITE	NOT HISPANIC OR LATINO	[Not Available]	No	L-Upper	Central Lung	Lung Squamous Cell Carcinoma- Not Otherwise Specified (NOS)	2012	[Not Available]	[Not Available]	R0	7th	T2a	N1	M0	Stage IIA	[Not Applicable]	[Not Applicable]	[Not Applicable]	[Not Applicable]	[Not Available]	[Not Available]	[Not Available]	[Not Available]	[Not Available]	[Not Available]	[Unknown]	[Not Available]	[Not Available]	[Unknown]	[Not Available]	[Unknown]	[Not Available]	No	[Not Available]	4	1969	1999	Alive	120	90	0	Preoperative
FD8A7339-CF34-4B91-BFC4-53CE60FFD737	TCGA-56-A4BX	2013-01-25	Lung Squamous Cell Carcinoma	YES	NO	MALE	WHITE	NOT HISPANIC OR LATINO	[Not Available]	No	R-Lower	Central Lung	Lung Squamous Cell Carcinoma- Not Otherwise Specified (NOS)	2012	[Not Available]	[Not Available]	R0	7th	T2b	N0	MX	Stage IIA	[Not Applicable]	[Not Applicable]	[Not Applicable]	[Not Applicable]	YES	79	85	89	91	53	NO	[Not Available]	[Not Available]	NO	[Not Available]	NO	[Not Available]	No	[Not Available]	4	1957	2012	Alive	83	70	2	Preoperative
C0BB1051-09B2-46F3-A22B-FE313B1A6A4E	TCGA-56-A4BY	2013-01-25	Lung Squamous Cell Carcinoma	YES	NO	MALE	WHITE	NOT HISPANIC OR LATINO	[Not Available]	Yes, History of Prior Malignancy	L-Upper	Central Lung	Lung Squamous Cell Carcinoma- Not Otherwise Specified (NOS)	2012	[Not Available]	[Not Available]	RX	7th	T2a	N0	MX	Stage IB	[Not Applicable]	[Not Applicable]	[Not Applicable]	[Not Applicable]	YES	44	[Not Available]	71	[Not Available]	16	NO	[Not Available]	[Not Available]	NO	[Not Available]	NO	[Not Available]	No	[Not Available]	4	1961	2004	Alive	65	80	2	Preoperative
C9439A80-ABF5-4EDE-B552-7784BB14213A	TCGA-56-A4ZJ	2013-03-15	Lung Squamous Cell Carcinoma	YES	NO	FEMALE	WHITE	NOT HISPANIC OR LATINO	[Not Available]	Yes, History of Prior Malignancy	R-Lower	[Unknown]	Lung Squamous Cell Carcinoma- Not Otherwise Specified (NOS)	2012	[Not Available]	[Not Available]	R0	7th	T1a	N0	M0	Stage IA	[Not Applicable]	[Not Applicable]	[Not Applicable]	[Not Applicable]	YES	115	118	77	75	48	[Unknown]	[Not Available]	[Not Available]	[Unknown]	[Not Available]	[Unknown]	[Not Available]	No	[Not Available]	4	[Not Available]	2002	Alive	100	[Not Evaluated]	[Not Evaluated]	[Not Evaluated]
A77675BD-ED25-45F4-B418-CB8FC979C780	TCGA-56-A4ZK	2013-03-15	Lung Squamous Cell Carcinoma	YES	NO	FEMALE	WHITE	NOT HISPANIC OR LATINO	[Not Available]	No	R-Lower	Central Lung	Lung Squamous Cell Carcinoma- Not Otherwise Specified (NOS)	2012	[Not Available]	[Not Available]	R1	7th	T2	N0	M0	Stage IB	[Not Applicable]	[Not Applicable]	[Not Applicable]	[Not Applicable]	[Not Available]	[Not Available]	[Not Available]	[Not Available]	[Not Available]	[Not Available]	NO	[Not Available]	[Not Available]	NO	[Not Available]	NO	[Not Available]	No	[Not Available]	4	1955	2007	Alive	[Not Available]	90	1	Preoperative
2A0B4559-5ECE-4B79-9C89-2EBE7CF82905	TCGA-56-A5DR	2013-07-15	Lung Squamous Cell Carcinoma	YES	NO	MALE	WHITE	NOT HISPANIC OR LATINO	[Not Available]	Yes, History of Prior Malignancy	L-Upper	[Unknown]	Lung Squamous Cell Carcinoma- Not Otherwise Specified (NOS)	2012	[Not Available]	[Not Available]	R0	7th	T1a	N0	MX	Stage IA	[Not Applicable]	[Not Applicable]	[Not Applicable]	[Not Applicable]	YES	70	[Not Available]	52	[Not Available]	64	NO	[Not Available]	[Not Available]	NO	[Not Available]	NO	[Not Available]	No	[Not Available]	1	[Not Available]	[Not Available]	Alive	[Not Available]	[Not Evaluated]	[Not Evaluated]	[Not Evaluated]
EDBFF8E2-6E22-474C-A813-B3B258972A99	TCGA-56-A5DS	2013-07-15	Lung Squamous Cell Carcinoma	YES	NO	FEMALE	WHITE	NOT HISPANIC OR LATINO	[Not Available]	No	R-Lower	[Unknown]	Lung Squamous Cell Carcinoma- Not Otherwise Specified (NOS)	2012	[Not Available]	[Not Available]	R0	7th	T2a	N0	MX	Stage IB	[Not Applicable]	[Not Applicable]	[Not Applicable]	[Not Applicable]	YES	[Not Available]	[Not Available]	[Not Available]	[Not Available]	[Not Available]	NO	[Not Available]	[Not Available]	NO	[Not Available]	NO	[Not Available]	No	[Not Available]	2	1962	[Not Available]	Alive	50	[Not Evaluated]	[Not Evaluated]	[Not Evaluated]
76618CF5-F6E0-46EF-A1C0-ACC0AD9FDCCB	TCGA-56-A62T	2013-10-15	Lung Squamous Cell Carcinoma	YES	NO	MALE	BLACK OR AFRICAN AMERICAN	NOT HISPANIC OR LATINO	[Not Available]	No	L-Upper	Central Lung	Lung Squamous Cell Carcinoma- Not Otherwise Specified (NOS)	2013	[Not Available]	[Not Available]	R1	7th	T2b	N0	MX	Stage IIA	[Not Applicable]	[Not Applicable]	[Not Applicable]	[Not Applicable]	YES	66	98	[Not Available]	[Not Available]	64	NO	[Not Available]	[Not Available]	NO	[Not Available]	NO	[Not Available]	No	[Not Available]	2	1962	[Not Available]	Alive	102	90	1	Preoperative
14313474-376f-4606-9ed9-25ed2acff411	TCGA-58-8386	2012-07-04	Lung Squamous Cell Carcinoma	NO	YES	MALE	[Not Evaluated]	[Not Evaluated]	[Not Available]	No	R-Upper	Central Lung	Lung Squamous Cell Carcinoma- Not Otherwise Specified (NOS)	2008	[Not Available]	[Not Available]	R0	6th	T3	NX	M1	Stage IV	[Not Applicable]	[Not Applicable]	[Not Applicable]	[Not Applicable]	YES	85	[Not Available]	55	[Not Available]	[Not Available]	NO	[Not Available]	[Not Available]	NO	[Not Available]	NO	[Not Available]	No	[Not Available]	2	[Not Available]	[Not Available]	Dead	65	90	[Unknown]	Preoperative
7b599ce3-6aed-4333-8ba5-2b1bf7ec7aab	TCGA-58-8387	2012-07-04	Lung Squamous Cell Carcinoma	NO	YES	MALE	WHITE	NOT HISPANIC OR LATINO	[Not Available]	No	R-Lower	Peripheral Lung	Lung Squamous Cell Carcinoma- Not Otherwise Specified (NOS)	2010	[Not Available]	[Not Available]	R0	7th	T2b	N0	M0	Stage IIA	[Not Applicable]	[Not Applicable]	[Not Applicable]	[Not Applicable]	YES	74	[Not Available]	74	[Not Available]	[Not Available]	NO	[Not Available]	[Not Available]	NO	[Not Available]	NO	[Not Available]	No	[Not Available]	4	[Not Available]	2010	Dead	40	90	0	Preoperative
5489b76d-68d9-48c3-8961-4a147bb23216	TCGA-58-8388	2012-07-04	Lung Squamous Cell Carcinoma	NO	YES	MALE	WHITE	NOT HISPANIC OR LATINO	[Not Available]	No	L-Upper	Peripheral Lung	Lung Basaloid Squamous Cell Carcinoma	2010	[Not Available]	[Not Available]	R0	7th	T2a	N0	M0	Stage IB	[Not Applicable]	[Not Applicable]	[Not Applicable]	[Not Applicable]	YES	71	[Not Available]	65	[Not Available]	[Not Available]	NO	[Not Available]	[Not Available]	NO	[Not Available]	NO	[Not Available]	No	[Not Available]	2	[Not Available]	[Not Available]	Alive	80	90	0	Preoperative
80b5ef6b-6b2d-4f87-b4a9-5c22f7bfda7c	TCGA-58-8390	2012-07-04	Lung Squamous Cell Carcinoma	NO	YES	MALE	WHITE	NOT HISPANIC OR LATINO	[Not Available]	No	R-Lower	Central Lung	Lung Squamous Cell Carcinoma- Not Otherwise Specified (NOS)	2010	[Not Available]	[Not Available]	R0	7th	T2b	N0	M0	Stage IIA	[Not Applicable]	[Not Applicable]	[Not Applicable]	[Not Applicable]	YES	64	[Not Available]	72	[Not Available]	[Not Available]	NO	[Not Available]	[Not Available]	NO	[Not Available]	NO	[Not Available]	No	[Not Available]	4	[Not Available]	1998	Alive	120	90	0	Preoperative
9ed5c6fe-24d2-4ee6-88ba-7319c9cfa05e	TCGA-58-8391	2012-07-04	Lung Squamous Cell Carcinoma	NO	YES	FEMALE	WHITE	NOT HISPANIC OR LATINO	[Not Available]	No	Bronchial	Central Lung	Lung Squamous Cell Carcinoma- Not Otherwise Specified (NOS)	2006	[Not Available]	[Not Available]	R0	6th	T2	N2	M0	Stage IIIA	[Not Applicable]	[Not Applicable]	[Not Applicable]	[Not Applicable]	YES	75	[Not Available]	74	[Not Available]	[Not Available]	NO	[Not Available]	[Not Available]	NO	[Not Available]	NO	[Not Available]	No	[Not Available]	2	[Not Available]	[Not Available]	Alive	30	100	[Unknown]	Preoperative
45aa07c3-cea4-456e-8000-b4572a2163a8	TCGA-58-8392	2012-07-04	Lung Squamous Cell Carcinoma	NO	YES	MALE	WHITE	NOT HISPANIC OR LATINO	[Not Available]	No	L-Upper	Peripheral Lung	Lung Squamous Cell Carcinoma- Not Otherwise Specified (NOS)	2010	[Not Available]	[Not Available]	R0	7th	T2a	N0	M0	Stage IB	[Not Applicable]	[Not Applicable]	[Not Applicable]	[Not Applicable]	YES	31	[Not Available]	33	[Not Available]	[Not Available]	NO	[Not Available]	[Not Available]	YES	L858R	NO	[Not Available]	No	[Not Available]	2	[Not Available]	[Not Available]	Dead	80	70	1	Preoperative
14b159f8-c31b-4e2a-a76d-fe32026e85bb	TCGA-58-8393	2012-07-04	Lung Squamous Cell Carcinoma	NO	YES	FEMALE	WHITE	NOT HISPANIC OR LATINO	[Not Available]	No	R-Lower	Central Lung	Lung Squamous Cell Carcinoma- Not Otherwise Specified (NOS)	2010	[Not Available]	[Not Available]	R0	7th	T2a	N0	M0	Stage IB	[Not Applicable]	[Not Applicable]	[Not Applicable]	[Not Applicable]	YES	115	[Not Available]	72	[Not Available]	[Not Available]	NO	[Not Available]	[Not Available]	NO	[Not Available]	NO	[Not Available]	No	[Not Available]	2	[Not Available]	[Not Available]	Alive	7	100	0	Preoperative
DFF43217-7857-42CA-B87B-058C774A6AA7	TCGA-58-A46J	2012-10-29	Lung Squamous Cell Carcinoma	NO	YES	MALE	WHITE	NOT HISPANIC OR LATINO	[Not Available]	No	R-Upper	Central Lung	Lung Squamous Cell Carcinoma- Not Otherwise Specified (NOS)	2006	[Not Available]	[Not Available]	R0	6th	T2	N1	M0	Stage IIB	[Not Applicable]	[Not Applicable]	[Not Applicable]	[Not Applicable]	YES	48	[Not Available]	79	[Not Available]	[Not Available]	NO	[Not Available]	[Not Available]	NO	[Not Available]	NO	[Not Available]	No	[Not Available]	2	[Not Available]	[Not Available]	Alive	[Not Available]	80	[Not Evaluated]	Preoperative
D8D53DF1-42D6-4D8B-AC4C-6F3993AC247D	TCGA-58-A46K	2012-10-29	Lung Squamous Cell Carcinoma	NO	YES	MALE	WHITE	NOT HISPANIC OR LATINO	[Not Available]	No	R-Lower	Peripheral Lung	Lung Basaloid Squamous Cell Carcinoma	2008	[Not Available]	[Not Available]	R0	6th	T2	N2	M0	Stage IIIA	[Not Applicable]	[Not Applicable]	[Not Applicable]	[Not Applicable]	YES	82	[Not Available]	70	[Not Available]	[Not Available]	NO	[Not Available]	[Not Available]	NO	[Not Available]	NO	[Not Available]	No	[Not Available]	4	[Not Available]	2005	Dead	10	100	0	Preoperative
1BA4E70C-692C-487A-ABC5-36E5F0A03286	TCGA-58-A46L	2012-10-29	Lung Squamous Cell Carcinoma	NO	YES	MALE	WHITE	NOT HISPANIC OR LATINO	[Not Available]	No	R-Upper	Central Lung	Lung Basaloid Squamous Cell Carcinoma	2008	[Not Available]	[Not Available]	R0	6th	T2	N2	M0	Stage IIIA	[Not Applicable]	[Not Applicable]	[Not Applicable]	[Not Applicable]	YES	61	[Not Available]	50	[Not Available]	[Not Available]	NO	[Not Available]	[Not Available]	NO	[Not Available]	NO	[Not Available]	No	[Not Available]	5	[Not Available]	[Not Available]	Alive	[Not Available]	100	0	Preoperative
F37F9827-9C3B-4AED-A2CB-5E905F1E2D2E	TCGA-58-A46M	2012-10-29	Lung Squamous Cell Carcinoma	NO	YES	MALE	WHITE	NOT HISPANIC OR LATINO	[Not Available]	No	L-Lower	Central Lung	Lung Squamous Cell Carcinoma- Not Otherwise Specified (NOS)	2010	[Not Available]	[Not Available]	R0	7th	T2b	N1	M0	Stage IIB	[Not Applicable]	[Not Applicable]	[Not Applicable]	[Not Applicable]	YES	0	[Not Available]	41	[Not Available]	[Not Available]	NO	[Not Available]	[Not Available]	NO	[Not Available]	NO	[Not Available]	No	[Not Available]	2	[Not Available]	[Not Available]	Alive	[Not Available]	100	0	Preoperative
FE49127A-8402-4479-AFFF-801C6452DE25	TCGA-58-A46N	2012-10-29	Lung Squamous Cell Carcinoma	NO	YES	MALE	WHITE	NOT HISPANIC OR LATINO	[Not Available]	No	R-Lower	Central Lung	Lung Basaloid Squamous Cell Carcinoma	2011	[Not Available]	[Not Available]	R0	7th	T2a	N0	M0	Stage IB	[Not Applicable]	[Not Applicable]	[Not Applicable]	[Not Applicable]	YES	63	[Not Available]	58	[Not Available]	[Not Available]	NO	[Not Available]	[Not Available]	NO	[Not Available]	NO	[Not Available]	No	[Not Available]	2	[Not Available]	[Not Available]	Alive	50	90	0	Preoperative
acae4e48-57de-40c5-9ae5-4386144ebaea	TCGA-60-2695	2010-07-15	Lung Squamous Cell Carcinoma	NO	YES	FEMALE	WHITE	NOT HISPANIC OR LATINO	[Not Available]	No	L-Upper	[Not Available]	Lung Basaloid Squamous Cell Carcinoma	2009	[Not Available]	[Not Available]	R0	[Not Available]	T2	N0	M0	Stage IB	[Not Applicable]	[Not Applicable]	[Not Applicable]	[Not Applicable]	[Not Available]	[Not Available]	[Not Available]	[Not Available]	[Not Available]	[Not Available]	NO	[Not Available]	[Not Available]	NO	[Not Available]	NO	[Not Available]	No	[Not Available]	3	1951	1983	Alive	64	[Not Available]	[Not Available]	[Not Available]
bff77f70-973a-4b49-8fd9-4a767f5df2c0	TCGA-60-2696	2010-07-15	Lung Squamous Cell Carcinoma	NO	YES	FEMALE	BLACK OR AFRICAN AMERICAN	NOT HISPANIC OR LATINO	[Not Available]	Yes	L-Upper	Central Lung	Lung Squamous Cell Carcinoma- Not Otherwise Specified (NOS)	2009	[Not Available]	[Not Available]	RX	[Not Available]	T2	N0	M0	Stage IIA	[Not Applicable]	[Not Applicable]	[Not Applicable]	[Not Applicable]	[Not Available]	[Not Available]	[Not Available]	[Not Available]	[Not Available]	[Not Available]	NO	[Not Available]	[Not Available]	NO	[Not Available]	NO	[Not Available]	Yes	[Not Available]	3	1955	1985	Dead	15	0	[Not Available]	[Not Available]
3c112114-6a8b-4aea-9349-6dffbaad078d	TCGA-60-2697	2012-01-18	Lung Squamous Cell Carcinoma	NO	YES	MALE	WHITE	[Not Available]	[Not Available]	No	R-Middle	[Not Available]	Lung Squamous Cell Carcinoma- Not Otherwise Specified (NOS)	1992	[Not Available]	[Not Available]	RX	3rd	T2	N2	M0	Stage IIA	[Not Applicable]	[Not Applicable]	[Not Applicable]	[Not Applicable]	[Not Available]	[Not Available]	[Not Available]	[Not Available]	[Not Available]	[Not Available]	NO	[Not Available]	[Not Available]	NO	[Not Available]	NO	[Not Available]	Yes	[Not Available]	[Not Available]	[Not Available]	[Not Available]	Dead	[Not Available]	[Not Available]	[Not Available]	[Not Available]
fd9ee494-65fe-4de4-adff-7952a059b17f	TCGA-60-2698	2010-07-26	Lung Squamous Cell Carcinoma	NO	YES	MALE	WHITE	[Not Available]	[Not Available]	No	R-Lower	[Not Available]	Lung Squamous Cell Carcinoma- Not Otherwise Specified (NOS)	1993	[Not Available]	[Not Available]	RX	[Not Available]	T2	N1	M0	Stage IIB	[Not Applicable]	[Not Applicable]	[Not Applicable]	[Not Applicable]	[Not Available]	[Not Available]	[Not Available]	[Not Available]	[Not Available]	[Not Available]	NO	[Not Available]	[Not Available]	NO	[Not Available]	NO	[Not Available]	No	[Not Available]	4	[Not Available]	1993	Dead	[Not Available]	0	[Not Available]	[Not Available]
ca191cb3-1a0b-4192-860f-2fde7f9b2105	TCGA-60-2703	2011-12-21	Lung Squamous Cell Carcinoma	NO	YES	MALE	WHITE	NOT HISPANIC OR LATINO	[Not Available]	No	R-Lower	Peripheral Lung	Lung Squamous Cell Carcinoma- Not Otherwise Specified (NOS)	2002	[Not Available]	[Not Available]	R0	5th	T2	N1	M0	Stage IIB	[Not Applicable]	[Not Applicable]	[Not Applicable]	[Not Applicable]	[Not Available]	[Not Available]	[Not Available]	[Not Available]	[Not Available]	[Not Available]	NO	[Not Available]	[Not Available]	NO	[Not Available]	[Not Available]	[Not Available]	No	[Not Available]	4	1950	2000	Dead	50	[Not Available]	0	Preoperative
469eba45-5046-4d8a-9f9a-dfbd1e7cf560	TCGA-60-2704	2011-12-27	Lung Squamous Cell Carcinoma	NO	YES	MALE	WHITE	NOT HISPANIC OR LATINO	[Not Available]	No	R-Upper	Central Lung	Lung Squamous Cell Carcinoma- Not Otherwise Specified (NOS)	2003	[Not Available]	[Not Available]	R0	6th	T2	N1	M0	Stage IIB	[Not Applicable]	[Not Applicable]	[Not Applicable]	[Not Applicable]	[Not Available]	[Not Available]	[Not Available]	[Not Available]	[Not Available]	[Not Available]	NO	[Not Available]	[Not Available]	NO	[Not Available]	NO	[Not Available]	No	[Not Available]	2	1943	[Not Available]	Dead	60	[Not Available]	0	Post-Adjuvant Therapy
c1cac0d3-8074-4636-a0b9-47eeede6503b	TCGA-60-2706	2010-07-15	Lung Squamous Cell Carcinoma	NO	YES	MALE	WHITE	NOT HISPANIC OR LATINO	[Not Available]	No	R-Upper	[Not Available]	Lung Squamous Cell Carcinoma- Not Otherwise Specified (NOS)	2003	[Not Available]	[Not Available]	[Not Available]	[Not Available]	T1	N0	M0	Stage IA	[Not Applicable]	[Not Applicable]	[Not Applicable]	[Not Applicable]	[Not Available]	[Not Available]	[Not Available]	[Not Available]	[Not Available]	[Not Available]	NO	[Not Available]	[Not Available]	NO	[Not Available]	NO	[Not Available]	No	[Not Available]	2	1958	[Not Available]	Alive	51	[Not Available]	[Not Available]	[Not Available]
4d687740-96ca-4d78-8c78-1a2024ce6b6c	TCGA-60-2707	2010-07-16	Lung Squamous Cell Carcinoma	NO	YES	MALE	[Not Available]	HISPANIC OR LATINO	[Not Available]	No	L-Upper	Peripheral Lung	Lung Squamous Cell Carcinoma- Not Otherwise Specified (NOS)	2003	[Not Available]	[Not Available]	RX	[Not Available]	T2	N0	M0	Stage IB	[Not Applicable]	[Not Applicable]	[Not Applicable]	[Not Applicable]	[Not Available]	[Not Available]	[Not Available]	[Not Available]	[Not Available]	[Not Available]	NO	[Not Available]	[Not Available]	NO	[Not Available]	NO	[Not Available]	No	[Not Available]	3	1950	1983	Dead	49	[Not Available]	[Not Available]	[Not Available]
2ca47049-bc12-4992-b9cf-1c01dda639be	TCGA-60-2708	2010-07-16	Lung Squamous Cell Carcinoma	NO	YES	FEMALE	WHITE	NOT HISPANIC OR LATINO	[Not Available]	No	L-Lower	Central Lung	Lung Squamous Cell Carcinoma- Not Otherwise Specified (NOS)	2004	[Not Available]	[Not Available]	R0	[Not Available]	T2	N1	M0	Stage IIB	[Not Applicable]	[Not Applicable]	[Not Applicable]	[Not Applicable]	[Not Available]	[Not Available]	[Not Available]	[Not Available]	[Not Available]	[Not Available]	NO	[Not Available]	[Not Available]	NO	[Not Available]	NO	[Not Available]	No	[Not Available]	4	1963	2003	Alive	20	[Not Available]	[Not Available]	[Not Available]
4718e180-c166-4826-b5a1-945f4a56eb16	TCGA-60-2709	2011-08-02	Lung Squamous Cell Carcinoma	NO	YES	MALE	BLACK OR AFRICAN AMERICAN	NOT HISPANIC OR LATINO	[Not Available]	No	L-Upper	Peripheral Lung	Lung Squamous Cell Carcinoma- Not Otherwise Specified (NOS)	2004	[Not Available]	[Not Available]	R0	6th	T2	N0	MX	Stage IB	[Not Applicable]	[Not Applicable]	[Not Applicable]	[Not Applicable]	[Not Available]	[Not Available]	[Not Available]	[Not Available]	[Not Available]	[Not Available]	NO	[Not Available]	[Not Available]	NO	[Not Available]	NO	[Not Available]	No	[Not Available]	2	1959	[Not Available]	Alive	157.5	[Not Available]	[Not Available]	[Not Available]
b28e3be1-9843-4204-b999-b3e2a909c7bd	TCGA-60-2710	2010-07-16	Lung Squamous Cell Carcinoma	NO	YES	FEMALE	WHITE	NOT HISPANIC OR LATINO	[Not Available]	No	L-Upper	Peripheral Lung	Lung Squamous Cell Carcinoma- Not Otherwise Specified (NOS)	2005	[Not Available]	[Not Available]	[Not Available]	6th	T1	N1	M0	Stage IIA	[Not Applicable]	[Not Applicable]	[Not Applicable]	[Not Applicable]	YES	61	[Not Available]	67	[Not Available]	61	NO	[Not Available]	[Not Available]	NO	[Not Available]	NO	[Not Available]	Yes	[Not Available]	4	1963	2005	Alive	63	[Not Available]	[Not Available]	[Not Available]
1f11de87-a5fe-49fd-80c1-e279b2bc69de	TCGA-60-2711	2010-07-16	Lung Squamous Cell Carcinoma	NO	YES	FEMALE	WHITE	NOT HISPANIC OR LATINO	[Not Available]	Yes	R-Lower	Peripheral Lung	Lung Squamous Cell Carcinoma- Not Otherwise Specified (NOS)	2007	[Not Available]	[Not Available]	R0	[Not Available]	T2	N0	M0	Stage IB	[Not Applicable]	[Not Applicable]	[Not Applicable]	[Not Applicable]	[Not Available]	[Not Available]	[Not Available]	[Not Available]	[Not Available]	[Not Available]	NO	[Not Available]	[Not Available]	NO	[Not Available]	NO	[Not Available]	No	[Not Available]	4	1969	2008	Alive	39	[Not Available]	[Not Available]	[Not Available]
f355cd59-eaa9-46c7-ab07-b90a7afc875c	TCGA-60-2712	2010-07-16	Lung Squamous Cell Carcinoma	NO	YES	FEMALE	WHITE	NOT HISPANIC OR LATINO	[Not Available]	Yes	L-Upper	Central Lung	Lung Squamous Cell Carcinoma- Not Otherwise Specified (NOS)	2006	[Not Available]	[Not Available]	R0	[Not Available]	T2	N1	M0	Stage IIB	[Not Applicable]	[Not Applicable]	[Not Applicable]	[Not Applicable]	[Not Available]	[Not Available]	[Not Available]	[Not Available]	[Not Available]	[Not Available]	NO	[Not Available]	[Not Available]	NO	[Not Available]	NO	[Not Available]	No	[Not Available]	3	1959	1979	Dead	10	0	[Not Available]	[Not Available]
e58e8850-154f-4695-bee0-005c76410327	TCGA-60-2713	2010-07-19	Lung Squamous Cell Carcinoma	NO	YES	MALE	WHITE	NOT HISPANIC OR LATINO	[Not Available]	No	R-Lower	[Not Available]	Lung Squamous Cell Carcinoma- Not Otherwise Specified (NOS)	2006	[Not Available]	[Not Available]	R0	[Not Available]	T2	N0	M0	Stage IB	[Not Applicable]	[Not Applicable]	[Not Applicable]	[Not Applicable]	[Not Available]	[Not Available]	[Not Available]	[Not Available]	[Not Available]	[Not Available]	NO	[Not Available]	[Not Available]	NO	[Not Available]	NO	[Not Available]	No	[Not Available]	2	1955	[Not Available]	Alive	110	[Not Available]	[Not Available]	[Not Available]
705a4688-f10f-4e6a-aed9-6efc3b3b9989	TCGA-60-2714	2010-07-19	Lung Squamous Cell Carcinoma	NO	YES	FEMALE	WHITE	NOT HISPANIC OR LATINO	[Not Available]	No	R-Upper	Peripheral Lung	Lung Squamous Cell Carcinoma- Not Otherwise Specified (NOS)	2006	[Not Available]	[Not Available]	R0	6th	T2	N1	M0	Stage IIB	[Not Applicable]	[Not Applicable]	[Not Applicable]	[Not Applicable]	YES	81	[Not Available]	73	[Not Available]	47	NO	[Not Available]	[Not Available]	NO	[Not Available]	NO	[Not Available]	Yes	[Not Available]	4	1960	2005	Alive	90	[Not Available]	[Not Available]	[Not Available]
f3e67161-1532-4b50-a9b5-0da80410c4d7	TCGA-60-2715	2011-05-09	Lung Squamous Cell Carcinoma	NO	YES	MALE	WHITE	NOT HISPANIC OR LATINO	[Not Available]	Yes	L-Upper	[Not Available]	Lung Squamous Cell Carcinoma- Not Otherwise Specified (NOS)	2008	[Not Available]	[Not Available]	RX	6th	T1	N0	M0	Stage IA	[Not Applicable]	[Not Applicable]	[Not Applicable]	[Not Applicable]	YES	86	[Not Available]	61	[Not Available]	134	NO	[Not Available]	[Not Available]	NO	[Not Available]	NO	[Not Available]	No	[Not Available]	4	1983	2006	Dead	25	100	0	Preoperative
7e691df8-8ea6-472c-86bf-504c7ba6983d	TCGA-60-2716	2010-07-19	Lung Squamous Cell Carcinoma	NO	YES	MALE	[Not Available]	NOT HISPANIC OR LATINO	[Not Available]	No	L-Upper	Central Lung	[Discrepancy]	2007	[Not Available]	[Not Available]	R0	[Not Available]	T2	N1	M0	Stage IIB	[Not Applicable]	[Not Applicable]	[Not Applicable]	[Not Applicable]	[Not Available]	[Not Available]	[Not Available]	[Not Available]	[Not Available]	[Not Available]	NO	[Not Available]	[Not Available]	NO	[Not Available]	NO	[Not Available]	No	[Not Available]	1	[Not Available]	[Not Available]	Alive	[Not Available]	[Not Available]	[Not Available]	[Not Available]
585e6487-b0a3-4828-8a06-46bee01dff74	TCGA-60-2719	2010-07-19	Lung Squamous Cell Carcinoma	NO	YES	FEMALE	WHITE	NOT HISPANIC OR LATINO	[Not Available]	No	R-Upper	Central Lung	Lung Squamous Cell Carcinoma- Not Otherwise Specified (NOS)	2007	[Not Available]	[Not Available]	R0	[Not Available]	T1	N0	M0	Stage IB	[Not Applicable]	[Not Applicable]	[Not Applicable]	[Not Applicable]	[Not Available]	[Not Available]	[Not Available]	[Not Available]	[Not Available]	[Not Available]	NO	[Not Available]	[Not Available]	NO	[Not Available]	NO	[Not Available]	No	[Not Available]	3	1950	1978	Alive	7	[Not Available]	[Not Available]	[Not Available]
337e77b3-7f58-4f92-96a4-c764b1ebfa56	TCGA-60-2720	2010-07-19	Lung Squamous Cell Carcinoma	NO	YES	FEMALE	WHITE	NOT HISPANIC OR LATINO	[Not Available]	No	R-Lower	Central Lung	Lung Squamous Cell Carcinoma- Not Otherwise Specified (NOS)	2007	[Not Available]	[Not Available]	R0	[Not Available]	T2	N0	M0	Stage IB	[Not Applicable]	[Not Applicable]	[Not Applicable]	[Not Applicable]	[Not Available]	[Not Available]	[Not Available]	[Not Available]	[Not Available]	[Not Available]	NO	[Not Available]	[Not Available]	NO	[Not Available]	NO	[Not Available]	No	[Not Available]	4	1967	2007	Alive	110	[Not Available]	[Not Available]	[Not Available]
bcd78677-98d5-4403-8313-e1fbd76e8ef7	TCGA-60-2721	2010-07-20	Lung Squamous Cell Carcinoma	NO	YES	MALE	WHITE	NOT HISPANIC OR LATINO	[Not Available]	Yes	R-Upper	Central Lung	Lung Squamous Cell Carcinoma- Not Otherwise Specified (NOS)	2008	[Not Available]	[Not Available]	R0	[Not Available]	T2	N0	M0	Stage IB	[Not Applicable]	[Not Applicable]	[Not Applicable]	[Not Applicable]	[Not Available]	[Not Available]	[Not Available]	[Not Available]	[Not Available]	[Not Available]	NO	[Not Available]	[Not Available]	NO	[Not Available]	NO	[Not Available]	No	[Not Available]	4	1946	2008	Alive	93	[Not Available]	[Not Available]	[Not Available]
6fd72426-f6c8-47ca-a500-d5d3600b9b15	TCGA-60-2722	2010-07-20	Lung Squamous Cell Carcinoma	NO	YES	MALE	WHITE	NOT HISPANIC OR LATINO	[Not Available]	No	R-Upper	Central Lung	Lung Squamous Cell Carcinoma- Not Otherwise Specified (NOS)	2008	[Not Available]	[Not Available]	R0	[Not Available]	T2	N1	M0	Stage IIB	[Not Applicable]	[Not Applicable]	[Not Applicable]	[Not Applicable]	[Not Available]	[Not Available]	[Not Available]	[Not Available]	[Not Available]	[Not Available]	NO	[Not Available]	[Not Available]	NO	[Not Available]	NO	[Not Available]	No	[Not Available]	4	[Not Available]	2008	Alive	90	[Not Available]	[Not Available]	[Not Available]
0d6a7cdf-daf5-4181-864f-430952e6fdb3	TCGA-60-2723	2010-07-20	Lung Squamous Cell Carcinoma	NO	YES	FEMALE	WHITE	NOT HISPANIC OR LATINO	[Not Available]	No	R-Middle	Peripheral Lung	Lung Squamous Cell Carcinoma- Not Otherwise Specified (NOS)	2008	[Not Available]	[Not Available]	R0	[Not Available]	T2	N0	M0	Stage IB	[Not Applicable]	[Not Applicable]	[Not Applicable]	[Not Applicable]	[Not Available]	[Not Available]	[Not Available]	[Not Available]	[Not Available]	[Not Available]	NO	[Not Available]	[Not Available]	NO	[Not Available]	NO	[Not Available]	No	[Not Available]	4	1949	2008	Alive	58	[Not Available]	[Not Available]	[Not Available]
a3e1ac67-a1f2-44fb-8343-a7e8239fc24a	TCGA-60-2724	2010-07-20	Lung Squamous Cell Carcinoma	NO	YES	MALE	WHITE	NOT HISPANIC OR LATINO	[Not Available]	No	Bronchial	[Not Available]	Lung Squamous Cell Carcinoma- Not Otherwise Specified (NOS)	2008	[Not Available]	[Not Available]	R0	[Not Available]	T3	N1	M0	Stage IIIA	[Not Applicable]	[Not Applicable]	[Not Applicable]	[Not Applicable]	[Not Available]	[Not Available]	[Not Available]	[Not Available]	[Not Available]	[Not Available]	NO	[Not Available]	[Not Available]	NO	[Not Available]	NO	[Not Available]	No	[Not Available]	4	1976	2006	Alive	60	[Not Available]	[Not Available]	[Not Available]
f03aacb8-5565-425f-a8d5-be1056f882e0	TCGA-60-2725	2011-04-13	Lung Squamous Cell Carcinoma	NO	YES	MALE	WHITE	NOT HISPANIC OR LATINO	[Not Available]	No	L-Upper	Central Lung	Lung Squamous Cell Carcinoma- Not Otherwise Specified (NOS)	2009	[Not Available]	[Not Available]	R0	[Not Available]	T2	N0	M0	Stage IB	[Not Applicable]	[Not Applicable]	[Not Applicable]	[Not Applicable]	[Not Available]	[Not Available]	[Not Available]	[Not Available]	[Not Available]	[Not Available]	NO	[Not Available]	[Not Available]	NO	[Not Available]	NO	[Not Available]	No	[Not Available]	3	1950	1978	Alive	56	90	0	Preoperative
3d1f4059-2220-45b4-a4d2-b14f76cec96a	TCGA-60-2726	2010-07-20	Lung Squamous Cell Carcinoma	NO	YES	MALE	WHITE	NOT HISPANIC OR LATINO	[Not Available]	No	R-Middle	Central Lung	Lung Squamous Cell Carcinoma- Not Otherwise Specified (NOS)	2009	[Not Available]	[Not Available]	R0	[Not Available]	T2	N1	M0	Stage IIA	[Not Applicable]	[Not Applicable]	[Not Applicable]	[Not Applicable]	[Not Available]	[Not Available]	[Not Available]	[Not Available]	[Not Available]	[Not Available]	NO	[Not Available]	[Not Available]	NO	[Not Available]	NO	[Not Available]	No	[Not Available]	4	1967	2009	Dead	42	0	[Not Available]	[Not Available]
dce87821-a5cd-4415-ab0c-ac5ed2459929	TCGA-63-5128	2011-04-04	Lung Squamous Cell Carcinoma	NO	YES	MALE	[Not Available]	[Not Available]	[Not Available]	No	L-Upper	[Not Available]	Lung Squamous Cell Carcinoma- Not Otherwise Specified (NOS)	2007	[Not Available]	[Not Available]	R0	6th	T2	N0	M0	Stage IB	[Not Applicable]	[Not Applicable]	[Not Applicable]	[Not Applicable]	[Not Available]	60	[Not Available]	[Not Available]	[Not Available]	[Not Available]	NO	[Not Available]	[Not Available]	NO	[Not Available]	NO	[Not Available]	No	[Not Available]	4	[Not Available]	2002	Dead	[Not Available]	[Not Available]	[Not Available]	[Not Available]
68107725-a883-4b33-a366-d9b4adb18028	TCGA-63-5131	2011-04-06	Lung Squamous Cell Carcinoma	NO	YES	MALE	[Not Available]	[Not Available]	[Not Available]	No	R-Lower	Central Lung	Lung Squamous Cell Carcinoma- Not Otherwise Specified (NOS)	2008	[Not Available]	[Not Available]	R0	6th	T2	N1	M0	Stage IIB	[Not Applicable]	[Not Applicable]	[Not Applicable]	[Not Applicable]	YES	60	[Not Available]	[Not Available]	[Not Available]	[Not Available]	NO	[Not Available]	[Not Available]	NO	[Not Available]	NO	[Not Available]	No	[Not Available]	4	[Not Available]	2001	Dead	50	[Not Available]	[Not Available]	[Not Available]
e171b02c-da2f-4452-a100-9ed989e73276	TCGA-63-6202	2011-08-11	Lung Squamous Cell Carcinoma	NO	YES	MALE	[Not Available]	[Not Available]	[Not Available]	No	R-Upper	Central Lung	Lung Squamous Cell Carcinoma- Not Otherwise Specified (NOS)	2008	[Not Available]	[Not Available]	R0	6th	T2	N0	M0	Stage IIA	[Not Applicable]	[Not Applicable]	[Not Applicable]	[Not Applicable]	YES	[Not Available]	[Not Available]	[Not Available]	[Not Available]	[Not Available]	[Not Available]	[Not Available]	[Not Available]	[Not Available]	[Not Available]	[Not Available]	[Not Available]	No	[Not Available]	4	1973	2008	Alive	35	[Not Available]	1	Preoperative
2d25094f-dc1f-4013-bc6b-54c64a666faa	TCGA-63-7020	2011-08-15	Lung Squamous Cell Carcinoma	NO	YES	MALE	[Not Available]	[Not Available]	[Not Available]	No	R-Upper	Peripheral Lung	Lung Squamous Cell Carcinoma- Not Otherwise Specified (NOS)	2007	[Not Available]	[Not Available]	R0	6th	T1	N0	M0	Stage IA	[Not Applicable]	[Not Applicable]	[Not Applicable]	[Not Applicable]	YES	[Not Available]	[Not Available]	[Not Available]	[Not Available]	93	[Not Available]	[Not Available]	[Not Available]	[Not Available]	[Not Available]	[Not Available]	[Not Available]	No	[Not Available]	4	1957	2010	Alive	50	[Not Available]	1	Preoperative
08ce6fee-2e8b-4398-8c99-aa426d03f523	TCGA-63-7021	2011-08-16	Lung Squamous Cell Carcinoma	NO	YES	MALE	[Not Available]	[Not Available]	[Not Available]	No	L-Upper	Peripheral Lung	Lung Squamous Cell Carcinoma- Not Otherwise Specified (NOS)	2007	[Not Available]	[Not Available]	R0	6th	T1	N0	M0	Stage IA	[Not Applicable]	[Not Applicable]	[Not Applicable]	[Not Applicable]	YES	[Not Available]	[Not Available]	[Not Available]	[Not Available]	62	[Not Available]	[Not Available]	[Not Available]	[Not Available]	[Not Available]	[Not Available]	[Not Available]	No	[Not Available]	4	1955	2007	Alive	21	[Not Available]	1	Preoperative
a296ca7c-eb11-4d8a-92a0-d549b5c0951a	TCGA-63-7022	2011-08-16	Lung Squamous Cell Carcinoma	NO	YES	FEMALE	[Not Available]	[Not Available]	[Not Available]	No	L-Upper	Peripheral Lung	Lung Squamous Cell Carcinoma- Not Otherwise Specified (NOS)	2007	[Not Available]	[Not Available]	R0	6th	T1	N0	M0	Stage IA	[Not Applicable]	[Not Applicable]	[Not Applicable]	[Not Applicable]	YES	[Not Available]	[Not Available]	[Not Available]	[Not Available]	[Not Available]	[Not Available]	[Not Available]	[Not Available]	[Not Available]	[Not Available]	[Not Available]	[Not Available]	No	[Not Available]	4	1947	2007	Alive	30	[Not Available]	0	Preoperative
31d8591b-9d80-406c-b61a-7a6544c73466	TCGA-63-7023	2011-08-16	Lung Squamous Cell Carcinoma	NO	YES	MALE	[Not Available]	[Not Available]	[Not Available]	No	L-Lower	Central Lung	Lung Squamous Cell Carcinoma- Not Otherwise Specified (NOS)	2008	[Not Available]	[Not Available]	R0	6th	T1	N1	M0	Stage IIA	[Not Applicable]	[Not Applicable]	[Not Applicable]	[Not Applicable]	YES	87	[Not Available]	[Not Available]	[Not Available]	70	[Not Available]	[Not Available]	[Not Available]	[Not Available]	[Not Available]	[Not Available]	[Not Available]	No	[Not Available]	4	1952	2008	Alive	55	[Not Available]	1	Preoperative
F9FA6DFA-9DC5-4BA9-92CF-C821E423183A	TCGA-63-A5M9	2014-09-11	Lung Squamous Cell Carcinoma	NO	YES	FEMALE	[Not Evaluated]	[Not Evaluated]	[Not Available]	[Not Available]	L-Lower	[Unknown]	Lung Squamous Cell Carcinoma- Not Otherwise Specified (NOS)	[Not Available]	[Not Available]	[Not Available]	RX	6th	T2	N1	M0	Stage IIB	[Not Applicable]	[Not Applicable]	[Not Applicable]	[Not Applicable]	[Not Available]	[Not Available]	[Not Available]	[Not Available]	[Not Available]	[Not Available]	[Unknown]	[Not Available]	[Not Available]	[Unknown]	[Not Available]	[Unknown]	[Not Available]	No	[Not Available]	4	[Not Available]	2010	Alive	25	[Unknown]	[Unknown]	[Unknown]
9B07EF0C-1329-4341-A5A4-42ABE7A6737C	TCGA-63-A5MB	2013-09-24	Lung Squamous Cell Carcinoma	NO	YES	MALE	[Not Evaluated]	[Not Evaluated]	[Not Available]	No	L-Upper	[Unknown]	Lung Squamous Cell Carcinoma- Not Otherwise Specified (NOS)	[Not Available]	[Not Available]	[Not Available]	R0	6th	T2	N0	M0	Stage IB	[Not Applicable]	[Not Applicable]	[Not Applicable]	[Not Applicable]	NO	[Not Available]	[Not Available]	[Not Available]	[Not Available]	[Not Available]	NO	[Not Available]	[Not Available]	NO	[Not Available]	NO	[Not Available]	No	[Not Available]	3	[Not Available]	1995	Alive	25	[Not Evaluated]	[Not Evaluated]	[Not Available]
05D4D9C7-FB6F-439A-BB97-F0E2737A7773	TCGA-63-A5MG	2013-09-24	Lung Squamous Cell Carcinoma	NO	YES	MALE	[Not Evaluated]	[Not Evaluated]	[Not Available]	No	L-Lower	[Unknown]	Lung Squamous Cell Carcinoma- Not Otherwise Specified (NOS)	[Not Available]	[Not Available]	[Not Available]	R0	6th	T2	N0	M0	Stage IB	[Not Applicable]	[Not Applicable]	[Not Applicable]	[Not Applicable]	NO	[Not Available]	[Not Available]	[Not Available]	[Not Available]	[Not Available]	NO	[Not Available]	[Not Available]	NO	[Not Available]	[Not Available]	[Not Available]	No	[Not Available]	3	[Not Available]	1990	Alive	[Not Available]	[Not Evaluated]	[Not Evaluated]	[Not Available]
51F0B1CB-4315-4ACD-A9C1-5353E0FF9D46	TCGA-63-A5MH	2013-09-24	Lung Squamous Cell Carcinoma	NO	YES	MALE	[Not Evaluated]	[Not Evaluated]	[Not Available]	Yes, History of Synchronous/Bilateral Malignancy	L-Lower	[Unknown]	Lung Squamous Cell Carcinoma- Not Otherwise Specified (NOS)	[Not Available]	[Not Available]	[Not Available]	R0	6th	T1	N0	M0	Stage IA	[Not Applicable]	[Not Applicable]	[Not Applicable]	[Not Applicable]	NO	[Not Available]	[Not Available]	[Not Available]	[Not Available]	[Not Available]	NO	[Not Available]	[Not Available]	NO	[Not Available]	NO	[Not Available]	No	[Not Available]	5	[Not Available]	[Not Available]	Alive	35	[Not Evaluated]	[Not Evaluated]	[Not Available]
1A02B991-39F7-4C52-9F6E-BF0F7C7BDE8D	TCGA-63-A5MI	2013-09-24	Lung Squamous Cell Carcinoma	NO	YES	MALE	[Not Evaluated]	[Not Evaluated]	[Not Available]	No	Bronchial	Peripheral Lung	Lung Squamous Cell Carcinoma- Not Otherwise Specified (NOS)	[Not Available]	[Not Available]	[Not Available]	R0	6th	T2	N2	M0	Stage IIIA	[Not Applicable]	[Not Applicable]	[Not Applicable]	[Not Applicable]	YES	[Not Available]	[Not Available]	[Not Available]	[Not Available]	[Not Available]	NO	[Not Available]	[Not Available]	NO	[Not Available]	NO	[Not Available]	No	[Not Available]	4	[Not Available]	2008	Alive	50	[Not Evaluated]	[Not Evaluated]	[Not Evaluated]
63D2A48D-50EC-4E84-86E7-C4B74C49D08F	TCGA-63-A5MJ	2013-09-24	Lung Squamous Cell Carcinoma	NO	YES	MALE	[Not Evaluated]	[Not Evaluated]	[Not Available]	No	Other (please specify)	[Unknown]	Lung Squamous Cell Carcinoma- Not Otherwise Specified (NOS)	[Not Available]	[Not Available]	[Not Available]	R0	6th	T2	N1	M0	Stage IIB	[Not Applicable]	[Not Applicable]	[Not Applicable]	[Not Applicable]	YES	[Not Available]	[Not Available]	[Not Available]	[Not Available]	[Not Available]	NO	[Not Available]	[Not Available]	NO	[Not Available]	NO	[Not Available]	No	[Not Available]	2	1989	[Not Available]	Alive	[Not Available]	[Not Evaluated]	[Not Evaluated]	[Not Available]
DDF19EB8-C3FE-441E-B6CF-C4943B6789D9	TCGA-63-A5ML	2013-09-24	Lung Squamous Cell Carcinoma	NO	YES	MALE	[Not Evaluated]	[Not Evaluated]	[Not Available]	No	R-Lower	[Unknown]	Lung Squamous Cell Carcinoma- Not Otherwise Specified (NOS)	[Not Available]	[Not Available]	[Not Available]	R0	6th	T2	N0	M0	Stage IB	[Not Applicable]	[Not Applicable]	[Not Applicable]	[Not Applicable]	YES	[Not Available]	[Not Available]	[Not Available]	[Not Available]	[Not Available]	NO	[Not Available]	[Not Available]	NO	[Not Available]	NO	[Not Available]	No	[Not Available]	4	[Not Available]	2009	Alive	60	[Not Evaluated]	[Not Evaluated]	[Not Available]
ABC753F0-5AE2-4BEC-96B8-6A05D84BF1C1	TCGA-63-A5MM	2013-09-24	Lung Squamous Cell Carcinoma	NO	YES	FEMALE	[Not Evaluated]	[Not Evaluated]	[Not Available]	No	Bronchial	[Unknown]	Lung Squamous Cell Carcinoma- Not Otherwise Specified (NOS)	[Not Available]	[Not Available]	[Not Available]	R0	6th	T2	N1	M0	Stage IIB	[Not Applicable]	[Not Applicable]	[Not Applicable]	[Not Applicable]	YES	79	[Not Available]	[Not Available]	[Not Available]	88	NO	[Not Available]	[Not Available]	NO	[Not Available]	NO	[Not Available]	No	[Not Available]	3	[Not Available]	1989	Dead	30	[Not Evaluated]	[Not Evaluated]	[Not Available]
D81944A2-6CEE-4773-912A-899FDF9EB1C4	TCGA-63-A5MN	2013-09-25	Lung Squamous Cell Carcinoma	NO	YES	FEMALE	[Not Evaluated]	[Not Evaluated]	[Not Available]	No	R-Upper	[Unknown]	Lung Squamous Cell Carcinoma- Not Otherwise Specified (NOS)	[Not Available]	[Not Available]	[Not Available]	R1	6th	T3	N0	M0	Stage IIB	[Not Applicable]	[Not Applicable]	[Not Applicable]	[Not Applicable]	YES	87	[Not Available]	[Not Available]	[Not Available]	103	NO	[Not Available]	[Not Available]	NO	[Not Available]	NO	[Not Available]	No	[Not Available]	1	[Not Available]	[Not Available]	Dead	[Not Available]	[Not Evaluated]	[Not Evaluated]	[Not Available]
F18C47E1-516F-43F7-8D31-4E5012BD22F0	TCGA-63-A5MP	2013-09-24	Lung Squamous Cell Carcinoma	NO	YES	MALE	[Not Evaluated]	[Not Evaluated]	[Not Available]	No	R-Lower	Central Lung	Lung Squamous Cell Carcinoma- Not Otherwise Specified (NOS)	[Not Available]	[Not Available]	[Not Available]	R0	6th	T2	N1	M0	Stage IIB	[Not Applicable]	[Not Applicable]	[Not Applicable]	[Not Applicable]	YES	62	[Not Available]	[Not Available]	[Not Available]	66	NO	[Not Available]	[Not Available]	NO	[Not Available]	NO	[Not Available]	No	[Not Available]	4	1956	1997	Alive	41	[Not Evaluated]	0	Preoperative
A2D7C06B-EFA9-4B7E-9EA6-B47C9AD6EF38	TCGA-63-A5MR	2013-09-24	Lung Squamous Cell Carcinoma	NO	YES	FEMALE	[Not Evaluated]	[Not Evaluated]	[Not Available]	No	L-Upper	Peripheral Lung	Lung Squamous Cell Carcinoma- Not Otherwise Specified (NOS)	[Not Available]	[Not Available]	[Not Available]	R0	6th	T2	N0	M0	Stage IB	[Not Applicable]	[Not Applicable]	[Not Applicable]	[Not Applicable]	YES	56	60	[Not Available]	[Not Available]	61	NO	[Not Available]	[Not Available]	NO	[Not Available]	NO	[Not Available]	No	[Not Available]	4	1957	1997	Alive	120	[Not Evaluated]	0	Preoperative
5F29578A-7606-4625-BD24-A194B3287024	TCGA-63-A5MS	2013-09-24	Lung Squamous Cell Carcinoma	NO	YES	MALE	[Not Evaluated]	[Not Evaluated]	[Not Available]	No	L-Upper	Central Lung	Lung Squamous Cell Carcinoma- Not Otherwise Specified (NOS)	[Not Available]	[Not Available]	[Not Available]	R0	6th	T2	N0	M0	Stage IB	[Not Applicable]	[Not Applicable]	[Not Applicable]	[Not Applicable]	YES	94	[Not Available]	[Not Available]	[Not Available]	83	NO	[Not Available]	[Not Available]	NO	[Not Available]	NO	[Not Available]	No	[Not Available]	3	[Not Available]	[Not Available]	Alive	6	[Not Evaluated]	0	Preoperative
531D1248-76AE-46A1-8F65-CDECF9BCB0D8	TCGA-63-A5MT	2013-09-24	Lung Squamous Cell Carcinoma	NO	YES	MALE	[Not Evaluated]	[Not Evaluated]	[Not Available]	No	R-Upper	Peripheral Lung	Lung Squamous Cell Carcinoma- Not Otherwise Specified (NOS)	[Not Available]	[Not Available]	[Not Available]	R0	7th	T3	N0	M0	Stage IIB	[Not Applicable]	[Not Applicable]	[Not Applicable]	[Not Applicable]	YES	86	[Not Available]	[Not Available]	[Not Available]	68	NO	[Not Available]	[Not Available]	NO	[Not Available]	NO	[Not Available]	No	[Not Available]	4	1961	2011	Alive	100	[Not Evaluated]	1	Preoperative
7625A27D-A012-4F4D-B637-5F85D7CDAE8C	TCGA-63-A5MU	2013-09-25	Lung Squamous Cell Carcinoma	NO	YES	MALE	[Not Evaluated]	[Not Evaluated]	[Not Available]	No	R-Lower	Central Lung	Lung Squamous Cell Carcinoma- Not Otherwise Specified (NOS)	[Not Available]	[Not Available]	[Not Available]	R0	7th	T2b	N1	M0	Stage IIB	[Not Applicable]	[Not Applicable]	[Not Applicable]	[Not Applicable]	YES	81	[Not Available]	69	[Not Available]	64	NO	[Not Available]	[Not Available]	NO	[Not Available]	NO	[Not Available]	No	[Not Available]	4	1981	2011	Dead	15	[Not Evaluated]	0	Preoperative
8D18E026-668B-4513-9C68-9E03B18592E3	TCGA-63-A5MV	2013-09-25	Lung Squamous Cell Carcinoma	NO	YES	MALE	[Not Evaluated]	[Not Evaluated]	[Not Available]	No	R-Lower	Peripheral Lung	Lung Squamous Cell Carcinoma- Not Otherwise Specified (NOS)	[Not Available]	[Not Available]	[Not Available]	R0	7th	T2b	N0	M0	Stage IIA	[Not Applicable]	[Not Applicable]	[Not Applicable]	[Not Applicable]	YES	55	64	66	71	60	NO	[Not Available]	[Not Available]	NO	[Not Available]	NO	[Not Available]	No	[Not Available]	4	1961	2011	Alive	50	[Not Evaluated]	0	Preoperative
34AC236D-942B-4B82-885F-26F174DBC29E	TCGA-63-A5MW	2013-09-25	Lung Squamous Cell Carcinoma	NO	YES	MALE	[Not Evaluated]	[Not Evaluated]	[Not Available]	No	R-Upper	Peripheral Lung	Lung Squamous Cell Carcinoma- Not Otherwise Specified (NOS)	[Not Available]	[Not Available]	[Not Available]	R0	6th	T2	N0	M0	Stage IB	[Not Applicable]	[Not Applicable]	[Not Applicable]	[Not Applicable]	YES	59	[Not Available]	58	[Not Available]	41	[Unknown]	[Not Available]	[Not Available]	[Unknown]	[Not Available]	[Unknown]	[Not Available]	No	[Not Available]	4	[Not Available]	[Not Available]	Alive	60	[Unknown]	[Unknown]	[Not Available]
3B25AFF2-9B5F-491A-8EFF-D71A9CC8666B	TCGA-63-A5MY	2013-09-25	Lung Squamous Cell Carcinoma	NO	YES	MALE	[Not Evaluated]	[Not Evaluated]	[Not Available]	No	L-Lower	[Unknown]	Lung Squamous Cell Carcinoma- Not Otherwise Specified (NOS)	[Not Available]	[Not Available]	[Not Available]	R0	7th	T1b	N0	M0	Stage IA	[Not Applicable]	[Not Applicable]	[Not Applicable]	[Not Applicable]	YES	67	67	69	69	52	[Unknown]	[Not Available]	[Not Available]	[Unknown]	[Not Available]	[Unknown]	[Not Available]	No	[Not Available]	4	1966	2010	Alive	40	[Unknown]	[Unknown]	[Not Available]
5860a9f1-30e8-4833-99bb-a6863e78914b	TCGA-66-2727	2011-03-07	Lung Squamous Cell Carcinoma	NO	YES	FEMALE	[Not Available]	[Not Available]	[Not Available]	No	L-Lower	[Not Available]	Lung Squamous Cell Carcinoma- Not Otherwise Specified (NOS)	2004	[Not Available]	[Not Available]	R0	5th	T2	N0	M0	Stage IB	[Not Applicable]	[Not Applicable]	[Not Applicable]	[Not Applicable]	[Not Available]	[Not Available]	[Not Available]	[Not Available]	[Not Available]	[Not Available]	[Not Available]	[Not Available]	[Not Available]	[Not Available]	[Not Available]	[Not Available]	[Not Available]	No	[Not Available]	4	1967	2004	Dead	56	[Not Available]	[Not Available]	[Not Available]
12bd70f5-2542-48cb-b296-ae9241b38f7f	TCGA-66-2734	2011-03-07	Lung Squamous Cell Carcinoma	NO	YES	FEMALE	[Not Available]	[Not Available]	[Not Available]	No	L-Lower	[Not Available]	Lung Squamous Cell Carcinoma- Not Otherwise Specified (NOS)	2005	[Not Available]	[Not Available]	R0	5th	T2	N0	M0	Stage IB	[Not Applicable]	[Not Applicable]	[Not Applicable]	[Not Applicable]	[Not Available]	[Not Available]	[Not Available]	[Not Available]	[Not Available]	[Not Available]	[Not Available]	[Not Available]	[Not Available]	[Not Available]	[Not Available]	[Not Available]	[Not Available]	No	[Not Available]	4	1965	2005	Alive	40	[Not Available]	[Not Available]	[Not Available]
3d6a027b-dfda-42b3-9323-407e42cf6d10	TCGA-66-2737	2011-03-07	Lung Squamous Cell Carcinoma	NO	YES	MALE	[Not Available]	[Not Available]	[Not Available]	No	R-Middle	[Not Available]	Lung Squamous Cell Carcinoma- Not Otherwise Specified (NOS)	2005	[Not Available]	[Not Available]	R0	5th	T2	N1	M0	Stage IIB	[Not Applicable]	[Not Applicable]	[Not Applicable]	[Not Applicable]	[Not Available]	[Not Available]	[Not Available]	[Not Available]	[Not Available]	[Not Available]	[Not Available]	[Not Available]	[Not Available]	[Not Available]	[Not Available]	[Not Available]	[Not Available]	No	[Not Available]	3	1949	1969	Alive	40	[Not Available]	[Not Available]	[Not Available]
a355bad1-bb49-4de5-892b-691ed0022d91	TCGA-66-2742	2011-03-07	Lung Squamous Cell Carcinoma	NO	YES	MALE	[Not Available]	[Not Available]	[Not Available]	No	R-Upper	[Not Available]	Lung Squamous Cell Carcinoma- Not Otherwise Specified (NOS)	2006	[Not Available]	[Not Available]	R0	5th	T2	N1	M1	Stage IV	[Not Applicable]	[Not Applicable]	[Not Applicable]	[Not Applicable]	[Not Available]	[Not Available]	[Not Available]	[Not Available]	[Not Available]	[Not Available]	[Not Available]	[Not Available]	[Not Available]	[Not Available]	[Not Available]	[Not Available]	[Not Available]	No	[Not Available]	3	1956	1991	Alive	44	[Not Available]	[Not Available]	[Not Available]
1ee543d5-b8c0-4f79-8373-6bb6319f2ee2	TCGA-66-2744	2011-03-07	Lung Squamous Cell Carcinoma	NO	YES	MALE	[Not Available]	[Not Available]	[Not Available]	No	R-Lower	[Not Available]	Lung Squamous Cell Carcinoma- Not Otherwise Specified (NOS)	2006	[Not Available]	[Not Available]	R0	5th	T2	N1	M0	Stage IIB	[Not Applicable]	[Not Applicable]	[Not Applicable]	[Not Applicable]	[Not Available]	[Not Available]	[Not Available]	[Not Available]	[Not Available]	[Not Available]	[Not Available]	[Not Available]	[Not Available]	[Not Available]	[Not Available]	[Not Available]	[Not Available]	No	[Not Available]	4	1956	2006	Alive	63	[Not Available]	[Not Available]	[Not Available]
d539844b-d65d-41e6-a8f0-fa884df118bc	TCGA-66-2753	2011-03-07	Lung Squamous Cell Carcinoma	NO	YES	MALE	[Not Available]	[Not Available]	[Not Available]	No	L-Lower	[Not Available]	Lung Squamous Cell Carcinoma- Not Otherwise Specified (NOS)	2007	[Not Available]	[Not Available]	R0	5th	T2	N0	M0	Stage IB	[Not Applicable]	[Not Applicable]	[Not Applicable]	[Not Applicable]	[Not Available]	[Not Available]	[Not Available]	[Not Available]	[Not Available]	[Not Available]	[Not Available]	[Not Available]	[Not Available]	[Not Available]	[Not Available]	[Not Available]	[Not Available]	No	[Not Available]	4	1953	2007	Alive	162	[Not Available]	[Not Available]	[Not Available]
637e900e-64ab-4bff-82b9-3ba6b5632f35	TCGA-66-2754	2011-03-07	Lung Squamous Cell Carcinoma	NO	YES	MALE	[Not Available]	[Not Available]	[Not Available]	No	R-Upper	[Not Available]	Lung Squamous Cell Carcinoma- Not Otherwise Specified (NOS)	2007	[Not Available]	[Not Available]	R0	6th	T2	N2	M0	Stage IIIA	[Not Applicable]	[Not Applicable]	[Not Applicable]	[Not Applicable]	[Not Available]	[Not Available]	[Not Available]	[Not Available]	[Not Available]	[Not Available]	[Not Available]	[Not Available]	[Not Available]	[Not Available]	[Not Available]	[Not Available]	[Not Available]	No	[Not Available]	4	1967	2007	Alive	40	[Not Available]	[Not Available]	[Not Available]
df7cfd84-a36a-44a0-b39f-a9ea1e0fd500	TCGA-66-2755	2011-03-07	Lung Squamous Cell Carcinoma	NO	YES	MALE	[Not Available]	[Not Available]	[Not Available]	No	R-Upper	[Not Available]	Lung Squamous Cell Carcinoma- Not Otherwise Specified (NOS)	2007	[Not Available]	[Not Available]	R0	5th	T2	N0	M0	Stage IB	[Not Applicable]	[Not Applicable]	[Not Applicable]	[Not Applicable]	[Not Available]	[Not Available]	[Not Available]	[Not Available]	[Not Available]	[Not Available]	[Not Available]	[Not Available]	[Not Available]	[Not Available]	[Not Available]	[Not Available]	[Not Available]	No	[Not Available]	3	1970	1990	Alive	20	[Not Available]	[Not Available]	[Not Available]
43abe847-4ba7-466e-8283-5d7b80b999a7	TCGA-66-2756	2011-03-07	Lung Squamous Cell Carcinoma	NO	YES	MALE	[Not Available]	[Not Available]	[Not Available]	No	L-Upper	[Not Available]	Lung Squamous Cell Carcinoma- Not Otherwise Specified (NOS)	2007	[Not Available]	[Not Available]	R0	6th	T4	N0	M0	Stage IIIB	[Not Applicable]	[Not Applicable]	[Not Applicable]	[Not Applicable]	[Not Available]	[Not Available]	[Not Available]	[Not Available]	[Not Available]	[Not Available]	[Not Available]	[Not Available]	[Not Available]	[Not Available]	[Not Available]	[Not Available]	[Not Available]	No	[Not Available]	4	1962	2002	Alive	[Not Available]	[Not Available]	[Not Available]	[Not Available]
a02932f3-5606-42a5-aee4-e5b9f5aa1aaa	TCGA-66-2757	2011-03-07	Lung Squamous Cell Carcinoma	NO	YES	FEMALE	[Not Available]	[Not Available]	[Not Available]	No	L-Upper	[Not Available]	Lung Squamous Cell Carcinoma- Not Otherwise Specified (NOS)	2007	[Not Available]	[Not Available]	R0	6th	T1	N0	M0	Stage IA	[Not Applicable]	[Not Applicable]	[Not Applicable]	[Not Applicable]	[Not Available]	[Not Available]	[Not Available]	[Not Available]	[Not Available]	[Not Available]	[Not Available]	[Not Available]	[Not Available]	[Not Available]	[Not Available]	[Not Available]	[Not Available]	No	[Not Available]	4	1959	2007	Alive	72	[Not Available]	[Not Available]	[Not Available]
dca4c540-897f-435b-9ee2-8f5b2e8734c6	TCGA-66-2758	2011-03-07	Lung Squamous Cell Carcinoma	NO	YES	MALE	[Not Available]	[Not Available]	[Not Available]	No	L-Upper	[Not Available]	Lung Squamous Cell Carcinoma- Not Otherwise Specified (NOS)	2007	[Not Available]	[Not Available]	R0	5th	T2	N0	M0	Stage IB	[Not Applicable]	[Not Applicable]	[Not Applicable]	[Not Applicable]	[Not Available]	[Not Available]	[Not Available]	[Not Available]	[Not Available]	[Not Available]	[Not Available]	[Not Available]	[Not Available]	[Not Available]	[Not Available]	[Not Available]	[Not Available]	No	[Not Available]	4	1951	2007	Alive	56	[Not Available]	[Not Available]	[Not Available]
e6b72c24-1607-43b9-8b8a-7bf83eea5895	TCGA-66-2759	2011-03-07	Lung Squamous Cell Carcinoma	NO	YES	MALE	[Not Available]	[Not Available]	[Not Available]	No	L-Lower	[Not Available]	Lung Squamous Cell Carcinoma- Not Otherwise Specified (NOS)	2007	[Not Available]	[Not Available]	R0	5th	T2	N2	M0	Stage IIIA	[Not Applicable]	[Not Applicable]	[Not Applicable]	[Not Applicable]	[Not Available]	[Not Available]	[Not Available]	[Not Available]	[Not Available]	[Not Available]	[Not Available]	[Not Available]	[Not Available]	[Not Available]	[Not Available]	[Not Available]	[Not Available]	No	[Not Available]	3	1959	1990	Alive	16	[Not Available]	[Not Available]	[Not Available]
1e3eb77c-d85b-437e-8b8c-12e5bd0e93dc	TCGA-66-2763	2011-03-07	Lung Squamous Cell Carcinoma	NO	YES	FEMALE	[Not Available]	[Not Available]	[Not Available]	No	L-Upper	[Not Available]	Lung Squamous Cell Carcinoma- Not Otherwise Specified (NOS)	2007	[Not Available]	[Not Available]	R0	6th	T2	N0	M0	Stage IB	[Not Applicable]	[Not Applicable]	[Not Applicable]	[Not Applicable]	[Not Available]	[Not Available]	[Not Available]	[Not Available]	[Not Available]	[Not Available]	[Not Available]	[Not Available]	[Not Available]	[Not Available]	[Not Available]	[Not Available]	[Not Available]	No	[Not Available]	4	1967	2007	Alive	40	[Not Available]	[Not Available]	[Not Available]
32c86f17-34c3-406b-85c5-4f5965619247	TCGA-66-2765	2011-03-07	Lung Squamous Cell Carcinoma	NO	YES	MALE	[Not Available]	[Not Available]	[Not Available]	No	L-Lower	[Not Available]	Lung Squamous Cell Carcinoma- Not Otherwise Specified (NOS)	2007	[Not Available]	[Not Available]	R0	6th	T2	N0	M0	Stage IB	[Not Applicable]	[Not Applicable]	[Not Applicable]	[Not Applicable]	[Not Available]	[Not Available]	[Not Available]	[Not Available]	[Not Available]	[Not Available]	[Not Available]	[Not Available]	[Not Available]	[Not Available]	[Not Available]	[Not Available]	[Not Available]	No	[Not Available]	4	1953	2007	Alive	108	[Not Available]	[Not Available]	[Not Available]
b913d254-8307-4b8a-8313-d978e32bb38f	TCGA-66-2766	2011-03-07	Lung Squamous Cell Carcinoma	NO	YES	MALE	[Not Available]	[Not Available]	[Not Available]	No	L-Upper	[Not Available]	Lung Squamous Cell Carcinoma- Not Otherwise Specified (NOS)	2007	[Not Available]	[Not Available]	R0	6th	T2	N2	M0	Stage IIIA	[Not Applicable]	[Not Applicable]	[Not Applicable]	[Not Applicable]	[Not Available]	[Not Available]	[Not Available]	[Not Available]	[Not Available]	[Not Available]	[Not Available]	[Not Available]	[Not Available]	[Not Available]	[Not Available]	[Not Available]	[Not Available]	No	[Not Available]	4	1967	2007	Alive	80	[Not Available]	[Not Available]	[Not Available]
174cdc32-e94a-4829-b6b7-df560de55be2	TCGA-66-2767	2011-03-07	Lung Squamous Cell Carcinoma	NO	YES	MALE	[Not Available]	[Not Available]	[Not Available]	No	R-Lower	[Not Available]	Lung Squamous Cell Carcinoma- Not Otherwise Specified (NOS)	2007	[Not Available]	[Not Available]	R0	6th	T2	N3	M0	Stage IIIB	[Not Applicable]	[Not Applicable]	[Not Applicable]	[Not Applicable]	[Not Available]	[Not Available]	[Not Available]	[Not Available]	[Not Available]	[Not Available]	[Not Available]	[Not Available]	[Not Available]	[Not Available]	[Not Available]	[Not Available]	[Not Available]	No	[Not Available]	4	1964	2007	Alive	43	[Not Available]	[Not Available]	[Not Available]
d3f8c35d-5197-43fa-a243-2baf9c44cf74	TCGA-66-2768	2011-03-07	Lung Squamous Cell Carcinoma	NO	YES	MALE	[Not Available]	[Not Available]	[Not Available]	No	L-Lower	[Not Available]	Lung Squamous Cell Carcinoma- Not Otherwise Specified (NOS)	2007	[Not Available]	[Not Available]	R0	6th	T2	N1	M0	Stage IIB	[Not Applicable]	[Not Applicable]	[Not Applicable]	[Not Applicable]	[Not Available]	[Not Available]	[Not Available]	[Not Available]	[Not Available]	[Not Available]	[Not Available]	[Not Available]	[Not Available]	[Not Available]	[Not Available]	[Not Available]	[Not Available]	No	[Not Available]	2	[Not Available]	[Not Available]	Alive	[Not Available]	[Not Available]	[Not Available]	[Not Available]
69e43922-e028-4090-8724-1fb2f018c7f2	TCGA-66-2769	2011-03-07	Lung Squamous Cell Carcinoma	NO	YES	MALE	[Not Available]	[Not Available]	[Not Available]	No	L-Upper	[Not Available]	Lung Squamous Cell Carcinoma- Not Otherwise Specified (NOS)	2007	[Not Available]	[Not Available]	R1	6th	T4	N0	M0	Stage IIIB	[Not Applicable]	[Not Applicable]	[Not Applicable]	[Not Applicable]	[Not Available]	[Not Available]	[Not Available]	[Not Available]	[Not Available]	[Not Available]	[Not Available]	[Not Available]	[Not Available]	[Not Available]	[Not Available]	[Not Available]	[Not Available]	No	[Not Available]	3	1947	1980	Dead	33	[Not Available]	[Not Available]	[Not Available]
f1b357e4-d67a-42c9-b0b7-12f69fa3da58	TCGA-66-2770	2011-03-07	Lung Squamous Cell Carcinoma	NO	YES	MALE	[Not Available]	[Not Available]	[Not Available]	No	R-Lower	[Not Available]	Lung Squamous Cell Carcinoma- Not Otherwise Specified (NOS)	2007	[Not Available]	[Not Available]	R0	6th	T2	N0	M0	Stage IB	[Not Applicable]	[Not Applicable]	[Not Applicable]	[Not Applicable]	[Not Available]	[Not Available]	[Not Available]	[Not Available]	[Not Available]	[Not Available]	[Not Available]	[Not Available]	[Not Available]	[Not Available]	[Not Available]	[Not Available]	[Not Available]	No	[Not Available]	3	1942	1967	Alive	25	[Not Available]	[Not Available]	[Not Available]
1535c8ab-100d-4886-8598-12a94483d010	TCGA-66-2771	2011-03-07	Lung Squamous Cell Carcinoma	NO	YES	MALE	[Not Available]	[Not Available]	[Not Available]	No	R-Upper	[Not Available]	Lung Squamous Cell Carcinoma- Not Otherwise Specified (NOS)	2007	[Not Available]	[Not Available]	R0	6th	T2	N1	M0	Stage IIB	[Not Applicable]	[Not Applicable]	[Not Applicable]	[Not Applicable]	[Not Available]	[Not Available]	[Not Available]	[Not Available]	[Not Available]	[Not Available]	[Not Available]	[Not Available]	[Not Available]	[Not Available]	[Not Available]	[Not Available]	[Not Available]	No	[Not Available]	4	1971	2006	Alive	70	[Not Available]	[Not Available]	[Not Available]
791f1b21-695e-4db1-b41d-80590c09d257	TCGA-66-2773	2011-03-07	Lung Squamous Cell Carcinoma	NO	YES	MALE	[Not Available]	[Not Available]	[Not Available]	No	L-Lower	[Not Available]	Lung Squamous Cell Carcinoma- Not Otherwise Specified (NOS)	2007	[Not Available]	[Not Available]	R0	6th	T2	N0	M0	Stage IB	[Not Applicable]	[Not Applicable]	[Not Applicable]	[Not Applicable]	[Not Available]	[Not Available]	[Not Available]	[Not Available]	[Not Available]	[Not Available]	[Not Available]	[Not Available]	[Not Available]	[Not Available]	[Not Available]	[Not Available]	[Not Available]	No	[Not Available]	3	1946	1969	Dead	58	[Not Available]	[Not Available]	[Not Available]
23e65963-d9f3-4cec-953c-4dd06f7d8668	TCGA-66-2777	2011-03-07	Lung Squamous Cell Carcinoma	NO	YES	MALE	[Not Available]	[Not Available]	[Not Available]	No	R-Middle	[Not Available]	Lung Squamous Cell Carcinoma- Not Otherwise Specified (NOS)	2007	[Not Available]	[Not Available]	R0	6th	T2	N0	M0	Stage IB	[Not Applicable]	[Not Applicable]	[Not Applicable]	[Not Applicable]	[Not Available]	[Not Available]	[Not Available]	[Not Available]	[Not Available]	[Not Available]	[Not Available]	[Not Available]	[Not Available]	[Not Available]	[Not Available]	[Not Available]	[Not Available]	No	[Not Available]	4	1972	2007	Alive	12	[Not Available]	[Not Available]	[Not Available]
aabc43bb-485a-49bc-b48a-d4e4ecd46d33	TCGA-66-2778	2011-03-07	Lung Squamous Cell Carcinoma	NO	YES	FEMALE	[Not Available]	[Not Available]	[Not Available]	No	L-Lower	[Not Available]	Lung Squamous Cell Carcinoma- Not Otherwise Specified (NOS)	2007	[Not Available]	[Not Available]	R2	6th	T2	N3	M0	Stage IIIB	[Not Applicable]	[Not Applicable]	[Not Applicable]	[Not Applicable]	[Not Available]	[Not Available]	[Not Available]	[Not Available]	[Not Available]	[Not Available]	[Not Available]	[Not Available]	[Not Available]	[Not Available]	[Not Available]	[Not Available]	[Not Available]	No	[Not Available]	4	1958	1995	Alive	37	[Not Available]	[Not Available]	[Not Available]
7ccce724-d401-487d-b444-6edbbd032303	TCGA-66-2780	2011-03-07	Lung Squamous Cell Carcinoma	NO	YES	MALE	[Not Available]	[Not Available]	[Not Available]	No	L-Upper	[Not Available]	Lung Squamous Cell Carcinoma- Not Otherwise Specified (NOS)	2007	[Not Available]	[Not Available]	R0	6th	T2	N0	M0	Stage IB	[Not Applicable]	[Not Applicable]	[Not Applicable]	[Not Applicable]	[Not Available]	[Not Available]	[Not Available]	[Not Available]	[Not Available]	[Not Available]	[Not Available]	[Not Available]	[Not Available]	[Not Available]	[Not Available]	[Not Available]	[Not Available]	No	[Not Available]	3	1956	1970	Dead	28	[Not Available]	[Not Available]	[Not Available]
d49b0369-905c-4608-96a9-cc854980fc4c	TCGA-66-2781	2011-03-07	Lung Squamous Cell Carcinoma	NO	YES	MALE	[Not Available]	[Not Available]	[Not Available]	No	L-Upper	[Not Available]	Lung Squamous Cell Carcinoma- Not Otherwise Specified (NOS)	2007	[Not Available]	[Not Available]	R0	6th	T2	N0	M0	Stage IB	[Not Applicable]	[Not Applicable]	[Not Applicable]	[Not Applicable]	[Not Available]	[Not Available]	[Not Available]	[Not Available]	[Not Available]	[Not Available]	[Not Available]	[Not Available]	[Not Available]	[Not Available]	[Not Available]	[Not Available]	[Not Available]	No	[Not Available]	4	1954	2007	Alive	80	[Not Available]	[Not Available]	[Not Available]
90b02be3-5496-40a2-8c6e-460d2898aadb	TCGA-66-2782	2011-03-07	Lung Squamous Cell Carcinoma	NO	YES	MALE	[Not Available]	[Not Available]	[Not Available]	No	R-Upper	[Not Available]	Lung Squamous Cell Carcinoma- Not Otherwise Specified (NOS)	2004	[Not Available]	[Not Available]	R0	5th	T3	N0	M0	Stage IIB	[Not Applicable]	[Not Applicable]	[Not Applicable]	[Not Applicable]	[Not Available]	[Not Available]	[Not Available]	[Not Available]	[Not Available]	[Not Available]	[Not Available]	[Not Available]	[Not Available]	[Not Available]	[Not Available]	[Not Available]	[Not Available]	No	[Not Available]	4	1954	2004	Dead	50	[Not Available]	[Not Available]	[Not Available]
d5e14ef5-1b78-4498-a2e2-77070c83eb7f	TCGA-66-2783	2011-03-07	Lung Squamous Cell Carcinoma	NO	YES	MALE	[Not Available]	[Not Available]	[Not Available]	No	L-Lower	[Not Available]	Lung Squamous Cell Carcinoma- Not Otherwise Specified (NOS)	2008	[Not Available]	[Not Available]	R2	6th	T2	N3	M0	Stage IIIB	[Not Applicable]	[Not Applicable]	[Not Applicable]	[Not Applicable]	[Not Available]	[Not Available]	[Not Available]	[Not Available]	[Not Available]	[Not Available]	[Not Available]	[Not Available]	[Not Available]	[Not Available]	[Not Available]	[Not Available]	[Not Available]	No	[Not Available]	4	1960	2003	Alive	65	[Not Available]	[Not Available]	[Not Available]
ce94e544-8887-479f-83cd-27b1c740e4c2	TCGA-66-2785	2011-03-07	Lung Squamous Cell Carcinoma	NO	YES	MALE	[Not Available]	[Not Available]	[Not Available]	No	L-Upper	[Not Available]	Lung Squamous Cell Carcinoma- Not Otherwise Specified (NOS)	2008	[Not Available]	[Not Available]	R0	6th	T2	N0	M0	Stage IB	[Not Applicable]	[Not Applicable]	[Not Applicable]	[Not Applicable]	[Not Available]	[Not Available]	[Not Available]	[Not Available]	[Not Available]	[Not Available]	[Not Available]	[Not Available]	[Not Available]	[Not Available]	[Not Available]	[Not Available]	[Not Available]	No	[Not Available]	4	[Not Available]	2008	Alive	70	[Not Available]	[Not Available]	[Not Available]
a9d7adec-3849-40e2-a2a2-f43443ec43bb	TCGA-66-2786	2011-03-07	Lung Squamous Cell Carcinoma	NO	YES	FEMALE	[Not Available]	[Not Available]	[Not Available]	No	R-Upper	[Not Available]	Lung Squamous Cell Carcinoma- Not Otherwise Specified (NOS)	2008	[Not Available]	[Not Available]	R0	5th	T1	N0	M0	Stage IA	[Not Applicable]	[Not Applicable]	[Not Applicable]	[Not Applicable]	[Not Available]	[Not Available]	[Not Available]	[Not Available]	[Not Available]	[Not Available]	[Not Available]	[Not Available]	[Not Available]	[Not Available]	[Not Available]	[Not Available]	[Not Available]	No	[Not Available]	4	1959	2007	Alive	74	[Not Available]	[Not Available]	[Not Available]
e1a2cccc-f0ce-4d23-bd58-e098009ebdac	TCGA-66-2787	2011-03-07	Lung Squamous Cell Carcinoma	NO	YES	MALE	[Not Available]	[Not Available]	[Not Available]	No	[Discrepancy]	[Not Available]	Lung Squamous Cell Carcinoma- Not Otherwise Specified (NOS)	2004	[Not Available]	[Not Available]	R0	6th	T1	N0	M0	Stage IA	[Not Applicable]	[Not Applicable]	[Not Applicable]	[Not Applicable]	[Not Available]	[Not Available]	[Not Available]	[Not Available]	[Not Available]	[Not Available]	[Not Available]	[Not Available]	[Not Available]	[Not Available]	[Not Available]	[Not Available]	[Not Available]	No	[Not Available]	4	1964	2004	Alive	40	[Not Available]	[Not Available]	[Not Available]
e487c72f-2cb4-4a88-bd69-cd006d5b4c1a	TCGA-66-2788	2011-03-07	Lung Squamous Cell Carcinoma	NO	YES	MALE	[Not Available]	[Not Available]	[Not Available]	No	L-Lower	[Not Available]	Lung Squamous Cell Carcinoma- Not Otherwise Specified (NOS)	2008	[Not Available]	[Not Available]	R0	6th	T2	N0	M0	Stage IB	[Not Applicable]	[Not Applicable]	[Not Applicable]	[Not Applicable]	[Not Available]	[Not Available]	[Not Available]	[Not Available]	[Not Available]	[Not Available]	[Not Available]	[Not Available]	[Not Available]	[Not Available]	[Not Available]	[Not Available]	[Not Available]	No	[Not Available]	4	1968	2008	Alive	80	[Not Available]	[Not Available]	[Not Available]
87ac0ad4-8c9d-409e-9a86-1d201d01769d	TCGA-66-2789	2011-03-07	Lung Squamous Cell Carcinoma	NO	YES	MALE	[Not Available]	[Not Available]	[Not Available]	No	L-Lower	[Not Available]	Lung Squamous Cell Carcinoma- Not Otherwise Specified (NOS)	2008	[Not Available]	[Not Available]	R0	6th	T1	N3	M0	Stage IIIB	[Not Applicable]	[Not Applicable]	[Not Applicable]	[Not Applicable]	[Not Available]	[Not Available]	[Not Available]	[Not Available]	[Not Available]	[Not Available]	[Not Available]	[Not Available]	[Not Available]	[Not Available]	[Not Available]	[Not Available]	[Not Available]	No	[Not Available]	4	1955	1995	Dead	40	[Not Available]	[Not Available]	[Not Available]
ede3e359-bc49-4899-abe5-92dc65588286	TCGA-66-2790	2011-03-07	Lung Squamous Cell Carcinoma	NO	YES	MALE	[Not Available]	[Not Available]	[Not Available]	No	L-Upper	[Not Available]	Lung Squamous Cell Carcinoma- Not Otherwise Specified (NOS)	2008	[Not Available]	[Not Available]	R0	6th	T2	N1	M0	Stage IIB	[Not Applicable]	[Not Applicable]	[Not Applicable]	[Not Applicable]	[Not Available]	[Not Available]	[Not Available]	[Not Available]	[Not Available]	[Not Available]	[Not Available]	[Not Available]	[Not Available]	[Not Available]	[Not Available]	[Not Available]	[Not Available]	No	[Not Available]	4	1951	2008	Alive	57	[Not Available]	[Not Available]	[Not Available]
a8e79b70-76c4-4d4f-8e1d-37daebf2a921	TCGA-66-2791	2011-03-07	Lung Squamous Cell Carcinoma	NO	YES	MALE	[Not Available]	[Not Available]	[Not Available]	No	R-Lower	[Not Available]	Lung Squamous Cell Carcinoma- Not Otherwise Specified (NOS)	2008	[Not Available]	[Not Available]	R1	6th	T2	N3	M0	Stage IIIB	[Not Applicable]	[Not Applicable]	[Not Applicable]	[Not Applicable]	[Not Available]	[Not Available]	[Not Available]	[Not Available]	[Not Available]	[Not Available]	[Not Available]	[Not Available]	[Not Available]	[Not Available]	[Not Available]	[Not Available]	[Not Available]	No	[Not Available]	4	1977	2002	Dead	25	[Not Available]	[Not Available]	[Not Available]
40dc2edc-4bde-441d-8fc5-8ce1bd42f267	TCGA-66-2792	2011-03-07	Lung Squamous Cell Carcinoma	NO	YES	MALE	[Not Available]	[Not Available]	[Not Available]	No	L-Lower	[Not Available]	Lung Squamous Cell Carcinoma- Not Otherwise Specified (NOS)	2008	[Not Available]	[Not Available]	R0	6th	T2	N1	M0	Stage IIB	[Not Applicable]	[Not Applicable]	[Not Applicable]	[Not Applicable]	[Not Available]	[Not Available]	[Not Available]	[Not Available]	[Not Available]	[Not Available]	[Not Available]	[Not Available]	[Not Available]	[Not Available]	[Not Available]	[Not Available]	[Not Available]	No	[Not Available]	4	1968	2008	Alive	10	[Not Available]	[Not Available]	[Not Available]
9af6ed4e-8cdc-4f49-84e9-ba1053b5b3ca	TCGA-66-2793	2011-03-07	Lung Squamous Cell Carcinoma	NO	YES	MALE	[Not Available]	[Not Available]	[Not Available]	No	R-Middle	[Not Available]	Lung Squamous Cell Carcinoma- Not Otherwise Specified (NOS)	2008	[Not Available]	[Not Available]	R0	6th	T4	N1	M0	Stage IIIB	[Not Applicable]	[Not Applicable]	[Not Applicable]	[Not Applicable]	[Not Available]	[Not Available]	[Not Available]	[Not Available]	[Not Available]	[Not Available]	[Not Available]	[Not Available]	[Not Available]	[Not Available]	[Not Available]	[Not Available]	[Not Available]	No	[Not Available]	4	1952	2008	Dead	112	[Not Available]	[Not Available]	[Not Available]
8d20352a-6180-40d0-adc0-c87fef854dfa	TCGA-66-2794	2011-03-07	Lung Squamous Cell Carcinoma	NO	YES	MALE	[Not Available]	[Not Available]	[Not Available]	No	L-Upper	[Not Available]	Lung Squamous Cell Carcinoma- Not Otherwise Specified (NOS)	2006	[Not Available]	[Not Available]	R0	6th	T4	N2	M0	Stage IIIB	[Not Applicable]	[Not Applicable]	[Not Applicable]	[Not Applicable]	[Not Available]	[Not Available]	[Not Available]	[Not Available]	[Not Available]	[Not Available]	[Not Available]	[Not Available]	[Not Available]	[Not Available]	[Not Available]	[Not Available]	[Not Available]	No	[Not Available]	4	1957	1993	Alive	100	[Not Available]	[Not Available]	[Not Available]
da93a143-5799-4856-a5f4-3ff3b9284311	TCGA-66-2795	2011-03-07	Lung Squamous Cell Carcinoma	NO	YES	MALE	[Not Available]	[Not Available]	[Not Available]	No	L-Upper	[Not Available]	Lung Squamous Cell Carcinoma- Not Otherwise Specified (NOS)	2008	[Not Available]	[Not Available]	R0	6th	T4	N1	M0	Stage IIIB	[Not Applicable]	[Not Applicable]	[Not Applicable]	[Not Applicable]	[Not Available]	[Not Available]	[Not Available]	[Not Available]	[Not Available]	[Not Available]	[Not Available]	[Not Available]	[Not Available]	[Not Available]	[Not Available]	[Not Available]	[Not Available]	No	[Not Available]	4	1965	2008	Alive	86	[Not Available]	[Not Available]	[Not Available]
4fbf2497-0774-4599-8c90-1961612b8e3a	TCGA-66-2800	2011-03-07	Lung Squamous Cell Carcinoma	NO	YES	MALE	[Not Available]	[Not Available]	[Not Available]	No	R-Upper	[Not Available]	Lung Squamous Cell Carcinoma- Not Otherwise Specified (NOS)	2004	[Not Available]	[Not Available]	R0	5th	T4	N0	M0	Stage IIIB	[Not Applicable]	[Not Applicable]	[Not Applicable]	[Not Applicable]	[Not Available]	[Not Available]	[Not Available]	[Not Available]	[Not Available]	[Not Available]	[Not Available]	[Not Available]	[Not Available]	[Not Available]	[Not Available]	[Not Available]	[Not Available]	No	[Not Available]	4	1950	2000	Alive	75	[Not Available]	[Not Available]	[Not Available]
3666bc65-8e40-409e-9a1f-41583dd6d978	TCGA-68-7755	2012-01-23	Lung Squamous Cell Carcinoma	YES	NO	FEMALE	WHITE	NOT HISPANIC OR LATINO	[Not Available]	No	R-Lower	Peripheral Lung	Lung Squamous Cell Carcinoma- Not Otherwise Specified (NOS)	2011	[Not Available]	[Not Available]	[Not Available]	7th	T1b	N1	M0	Stage IIA	[Not Applicable]	[Not Applicable]	[Not Applicable]	[Not Applicable]	[Not Available]	[Not Available]	[Not Available]	[Not Available]	[Not Available]	[Not Available]	NO	[Not Available]	[Not Available]	NO	[Not Available]	NO	[Not Available]	No	[Not Available]	4	1973	1999	Alive	78	[Not Available]	[Not Available]	[Not Available]
c6debfbb-de60-4d0d-aec2-d8d514c1f313	TCGA-68-7756	2012-01-23	Lung Squamous Cell Carcinoma	YES	NO	MALE	WHITE	NOT HISPANIC OR LATINO	[Not Available]	No	L-Upper	Peripheral Lung	Lung Squamous Cell Carcinoma- Not Otherwise Specified (NOS)	2011	[Not Available]	[Not Available]	[Not Available]	7th	T4	N1	MX	Stage IIIA	[Not Applicable]	[Not Applicable]	[Not Applicable]	[Not Applicable]	YES	84	89	87	85	96	NO	[Not Available]	[Not Available]	YES	[Not Available]	NO	[Not Available]	No	[Not Available]	3	[Not Available]	1971	Alive	20	[Not Available]	[Not Available]	[Not Available]
9665b02f-970d-41fc-a07c-f01c8e3fe5a8	TCGA-68-7757	2012-06-01	Lung Squamous Cell Carcinoma	NO	YES	MALE	WHITE	NOT HISPANIC OR LATINO	[Not Available]	No	L-Upper	[Not Available]	Lung Squamous Cell Carcinoma- Not Otherwise Specified (NOS)	2011	[Not Available]	[Not Available]	[Not Available]	7th	T1b	N0	MX	Stage IA	[Not Applicable]	[Not Applicable]	[Not Applicable]	[Not Applicable]	YES	85	86	81	83	71	NO	[Not Available]	[Not Available]	NO	[Not Available]	NO	[Not Available]	No	[Not Available]	4	1960	2010	Alive	25	[Not Available]	0	Preoperative
7b982d5e-3a7d-40ac-bd25-6044c62879b6	TCGA-68-8250	2012-05-23	Lung Squamous Cell Carcinoma	NO	YES	MALE	BLACK OR AFRICAN AMERICAN	NOT HISPANIC OR LATINO	[Not Available]	Yes, History of Synchronous/Bilateral Malignancy	R-Upper	[Not Available]	Lung Squamous Cell Carcinoma- Not Otherwise Specified (NOS)	2011	[Not Available]	[Not Available]	[Not Available]	7th	T1a	N0	MX	Stage IA	[Not Applicable]	[Not Applicable]	[Not Applicable]	[Not Applicable]	YES	88	[Not Available]	[Not Available]	[Not Available]	68	[Not Available]	[Not Available]	[Not Available]	NO	[Not Available]	[Not Available]	[Not Available]	No	[Not Available]	4	[Not Available]	2011	Alive	50	[Not Available]	[Not Available]	[Not Available]
d484c95f-5128-4239-a6e5-1496de39ba4b	TCGA-68-8251	2012-05-24	Lung Squamous Cell Carcinoma	NO	YES	MALE	WHITE	HISPANIC OR LATINO	[Not Available]	No	L-Upper	[Not Available]	Lung Squamous Cell Carcinoma- Not Otherwise Specified (NOS)	2012	[Not Available]	[Not Available]	[Not Available]	7th	T2a	N0	M0	Stage IB	[Not Applicable]	[Not Applicable]	[Not Applicable]	[Not Applicable]	YES	91	99	[Not Available]	[Not Available]	75	[Not Available]	[Not Available]	[Not Available]	[Not Available]	[Not Available]	[Not Available]	[Not Available]	No	[Not Available]	3	1944	1979	Alive	52	[Not Available]	[Not Available]	[Not Available]
0F8A76A1-4C3E-42E1-9DF3-95AA3AE8E676	TCGA-68-A59I	2013-02-18	Lung Squamous Cell Carcinoma	YES	NO	FEMALE	BLACK OR AFRICAN AMERICAN	NOT HISPANIC OR LATINO	[Not Available]	No	L-Lower	[Unknown]	Lung Squamous Cell Carcinoma- Not Otherwise Specified (NOS)	2012	[Not Available]	[Not Available]	[Not Evaluated]	7th	T3	N1	M0	Stage IIIA	[Not Applicable]	[Not Applicable]	[Not Applicable]	[Not Applicable]	YES	66.09	[Not Available]	101	[Not Available]	[Not Available]	[Unknown]	[Not Available]	[Not Available]	[Unknown]	[Not Available]	[Unknown]	[Not Available]	No	[Not Available]	4	1962	2012	Alive	50	[Not Evaluated]	[Not Evaluated]	[Not Evaluated]
3374E5D9-B627-4D4C-B66B-422F9564695E	TCGA-68-A59J	2013-02-18	Lung Squamous Cell Carcinoma	YES	NO	FEMALE	WHITE	NOT HISPANIC OR LATINO	[Not Available]	No	R-Lower	[Unknown]	Lung Squamous Cell Carcinoma- Not Otherwise Specified (NOS)	2012	[Not Available]	[Not Available]	R0	7th	T2a	N0	MX	Stage IB	[Not Applicable]	[Not Applicable]	[Not Applicable]	[Not Applicable]	YES	62	67	[Not Available]	[Not Available]	[Not Available]	[Unknown]	[Not Available]	[Not Available]	[Unknown]	[Not Available]	[Unknown]	[Not Available]	No	[Not Available]	4	1962	2007	Alive	45	[Unknown]	[Unknown]	[Unknown]
7639FDDB-86B5-45A1-BAC3-FF6A575E0CF5	TCGA-6A-AB49	2014-07-15	Lung Squamous Cell Carcinoma	NO	YES	FEMALE	BLACK OR AFRICAN AMERICAN	NOT HISPANIC OR LATINO	[Not Available]	No	L-Lower	Central Lung	Lung Squamous Cell Carcinoma- Not Otherwise Specified (NOS)	2009	[Not Available]	[Not Available]	RX	6th	T2	N0	MX	Stage IB	[Not Applicable]	[Not Applicable]	[Not Applicable]	[Not Applicable]	YES	70	71	72	70	[Not Available]	[Not Available]	[Not Available]	[Not Available]	[Not Available]	[Not Available]	[Not Available]	[Not Available]	No	[Not Available]	3	1969	[Not Available]	Dead	50	[Not Evaluated]	[Not Evaluated]	[Not Evaluated]
f7287eb4-c77d-4c67-a768-87fcccd668f5	TCGA-70-6722	2011-08-09	Lung Squamous Cell Carcinoma	YES	NO	MALE	ASIAN	NOT HISPANIC OR LATINO	[Not Available]	No	R-Upper	[Not Available]	Lung Squamous Cell Carcinoma- Not Otherwise Specified (NOS)	2010	[Not Available]	[Not Available]	RX	6th	T3	N1	M0	Stage IIIA	[Not Applicable]	[Not Applicable]	[Not Applicable]	[Not Applicable]	[Not Available]	[Not Available]	[Not Available]	[Not Available]	[Not Available]	[Not Available]	[Not Available]	[Not Available]	[Not Available]	[Not Available]	[Not Available]	[Not Available]	[Not Available]	No	[Not Available]	1	[Not Available]	[Not Available]	Alive	[Not Available]	20	[Not Available]	[Not Available]
15b0bfd4-2068-4ac8-aaa8-a2a6797253d8	TCGA-70-6723	2011-08-09	Lung Squamous Cell Carcinoma	YES	NO	MALE	ASIAN	NOT HISPANIC OR LATINO	[Not Available]	No	R-Upper	[Not Available]	Lung Papillary Squamous Cell Caricnoma	2010	[Not Available]	[Not Available]	RX	6th	T3	N0	M0	Stage IIA	[Not Applicable]	[Not Applicable]	[Not Applicable]	[Not Applicable]	[Not Available]	[Not Available]	[Not Available]	[Not Available]	[Not Available]	[Not Available]	[Not Available]	[Not Available]	[Not Available]	[Not Available]	[Not Available]	[Not Available]	[Not Available]	No	[Not Available]	1	[Not Available]	[Not Available]	Alive	[Not Available]	40	[Not Available]	[Not Available]
64925b54-c354-4290-a5c4-117fcdbf1ebb	TCGA-77-6842	2011-09-15	Lung Squamous Cell Carcinoma	NO	YES	MALE	WHITE	[Not Available]	[Not Available]	No	[Not Available]	Central Lung	Lung Squamous Cell Carcinoma- Not Otherwise Specified (NOS)	2000	[Not Available]	[Not Available]	R0	6th	T2	N1	M0	Stage IIB	[Not Applicable]	[Not Applicable]	[Not Applicable]	[Not Applicable]	[Not Available]	[Not Available]	[Not Available]	[Not Available]	[Not Available]	[Not Available]	NO	[Not Available]	[Not Available]	NO	[Not Available]	NO	[Not Available]	No	[Not Available]	4	1950	2000	Dead	22.5	[Not Available]	1	Preoperative
c2598334-f866-4cc3-93ec-2d2e8b85d319	TCGA-77-6843	2011-09-15	Lung Squamous Cell Carcinoma	NO	YES	MALE	WHITE	[Not Available]	[Not Available]	No	R-Upper	Central Lung	Lung Squamous Cell Carcinoma- Not Otherwise Specified (NOS)	2002	[Not Available]	[Not Available]	R0	6th	T1	N1	M0	Stage IIA	[Not Applicable]	[Not Applicable]	[Not Applicable]	[Not Applicable]	[Not Available]	[Not Available]	[Not Available]	[Not Available]	[Not Available]	[Not Available]	NO	[Not Available]	[Not Available]	NO	[Not Available]	NO	[Not Available]	No	[Not Available]	2	1941	[Not Available]	Dead	30	[Not Available]	2	Preoperative
fc6fa488-f8e3-4336-97dc-bd8c087c70e6	TCGA-77-6844	2011-09-16	Lung Squamous Cell Carcinoma	NO	YES	MALE	WHITE	[Not Available]	[Not Available]	No	R-Lower	Central Lung	Lung Squamous Cell Carcinoma- Not Otherwise Specified (NOS)	2002	[Not Available]	[Not Available]	R0	6th	T3	N1	M0	Stage IIIA	[Not Applicable]	[Not Applicable]	[Not Applicable]	[Not Applicable]	[Not Available]	[Not Available]	[Not Available]	[Not Available]	[Not Available]	[Not Available]	NO	[Not Available]	[Not Available]	NO	[Not Available]	NO	[Not Available]	No	[Not Available]	4	1942	1987	Dead	45	[Not Available]	1	Preoperative
f74b6db3-62af-4158-9310-a29b1180e469	TCGA-77-6845	2011-09-20	Lung Squamous Cell Carcinoma	NO	YES	MALE	WHITE	[Not Available]	[Not Available]	No	R-Middle	Central Lung	Lung Squamous Cell Carcinoma- Not Otherwise Specified (NOS)	2003	[Not Available]	[Not Available]	R0	6th	T3	N0	M0	Stage IIB	[Not Applicable]	[Not Applicable]	[Not Applicable]	[Not Applicable]	[Not Available]	[Not Available]	[Not Available]	[Not Available]	[Not Available]	[Not Available]	NO	[Not Available]	[Not Available]	NO	[Not Available]	NO	[Not Available]	No	[Not Available]	4	1952	2003	Dead	51	[Not Available]	1	Preoperative
dea2269f-7e15-4ea1-88a4-2314a819c731	TCGA-77-7138	2011-12-08	Lung Squamous Cell Carcinoma	NO	YES	MALE	[Not Available]	[Not Available]	[Not Available]	No	L-Lower	Peripheral Lung	Lung Squamous Cell Carcinoma- Not Otherwise Specified (NOS)	1999	[Not Available]	[Not Available]	R0	6th	T2	N0	M0	Stage IB	[Not Applicable]	[Not Applicable]	[Not Applicable]	[Not Applicable]	[Not Available]	[Not Available]	[Not Available]	[Not Available]	[Not Available]	[Not Available]	NO	[Not Available]	[Not Available]	NO	[Not Available]	NO	[Not Available]	No	[Not Available]	3	1959	1979	Dead	20	[Not Available]	1	Preoperative
ee850103-6314-41a3-9734-8b520de95b40	TCGA-77-7139	2011-09-22	Lung Squamous Cell Carcinoma	NO	YES	MALE	WHITE	[Not Available]	[Not Available]	No	R-Lower	Central Lung	Lung Squamous Cell Carcinoma- Not Otherwise Specified (NOS)	2002	[Not Available]	[Not Available]	R0	6th	T2	N1	M0	Stage IIB	[Not Applicable]	[Not Applicable]	[Not Applicable]	[Not Applicable]	NO	[Not Available]	[Not Available]	[Not Available]	[Not Available]	[Not Available]	NO	[Not Available]	[Not Available]	NO	[Not Available]	NO	[Not Available]	No	[Not Available]	4	1968	1991	Alive	2	[Not Available]	1	Preoperative
107f6b9a-2883-4499-a40a-ec25bc834a06	TCGA-77-7140	2011-12-09	Lung Squamous Cell Carcinoma	NO	YES	FEMALE	WHITE	[Not Available]	[Not Available]	Yes	L-Upper	Central Lung	Lung Squamous Cell Carcinoma- Not Otherwise Specified (NOS)	2002	[Not Available]	[Not Available]	R0	6th	T2	N1	M0	Stage IIB	[Not Applicable]	[Not Applicable]	[Not Applicable]	[Not Applicable]	[Not Available]	[Not Available]	[Not Available]	[Not Available]	[Not Available]	[Not Available]	NO	[Not Available]	[Not Available]	NO	[Not Available]	NO	[Not Available]	No	[Not Available]	1	[Not Available]	[Not Available]	Dead	[Not Available]	[Not Available]	0	Preoperative
5144fc75-b89e-47d8-96b4-aadd3f0da4e5	TCGA-77-7141	2011-09-15	Lung Squamous Cell Carcinoma	NO	YES	MALE	WHITE	[Not Available]	[Not Available]	No	L-Upper	Central Lung	Lung Squamous Cell Carcinoma- Not Otherwise Specified (NOS)	2003	[Not Available]	[Not Available]	R0	6th	T2	N0	M0	Stage IB	[Not Applicable]	[Not Applicable]	[Not Applicable]	[Not Applicable]	NO	[Not Available]	[Not Available]	[Not Available]	[Not Available]	[Not Available]	NO	[Not Available]	[Not Available]	NO	[Not Available]	NO	[Not Available]	No	[Not Available]	4	1953	1988	Alive	70	[Not Available]	1	Preoperative
37a0ab12-44af-4815-b7cc-961d44851470	TCGA-77-7142	2011-09-22	Lung Squamous Cell Carcinoma	NO	YES	FEMALE	WHITE	[Not Available]	[Not Available]	No	L-Upper	Peripheral Lung	Lung Squamous Cell Carcinoma- Not Otherwise Specified (NOS)	2007	[Not Available]	[Not Available]	R0	6th	T2	N0	M0	Stage IB	[Not Applicable]	[Not Applicable]	[Not Applicable]	[Not Applicable]	NO	[Not Available]	[Not Available]	[Not Available]	[Not Available]	[Not Available]	NO	[Not Available]	[Not Available]	NO	[Not Available]	NO	[Not Available]	No	[Not Available]	4	1959	2004	Alive	52.5	[Not Available]	1	Preoperative
b206617b-90a7-4467-b2ba-2000b2c6992d	TCGA-77-7335	2011-12-08	Lung Squamous Cell Carcinoma	NO	YES	FEMALE	WHITE	[Not Available]	[Not Available]	No	[Not Available]	Central Lung	Lung Squamous Cell Carcinoma- Not Otherwise Specified (NOS)	1996	[Not Available]	[Not Available]	R0	6th	T4	N2	M0	Stage IIIB	[Not Applicable]	[Not Applicable]	[Not Applicable]	[Not Applicable]	[Not Available]	[Not Available]	[Not Available]	[Not Available]	[Not Available]	[Not Available]	NO	[Not Available]	[Not Available]	NO	[Not Available]	NO	[Not Available]	No	[Not Available]	3	1954	1980	Dead	52	[Not Available]	1	Preoperative
cdab8ae1-d0e5-4a85-901e-2b05c63fa2b9	TCGA-77-7337	2011-12-08	Lung Squamous Cell Carcinoma	NO	YES	MALE	WHITE	[Not Available]	[Not Available]	No	L-Upper	Central Lung	Lung Squamous Cell Carcinoma- Not Otherwise Specified (NOS)	2000	[Not Available]	[Not Available]	R0	6th	T2	N1	M0	Stage IIB	[Not Applicable]	[Not Applicable]	[Not Applicable]	[Not Applicable]	[Not Available]	[Not Available]	[Not Available]	[Not Available]	[Not Available]	[Not Available]	NO	[Not Available]	[Not Available]	NO	[Not Available]	NO	[Not Available]	No	[Not Available]	4	1942	1996	Dead	79.5	[Not Available]	0	Preoperative
03016c31-a2eb-4a04-9e98-f10e0c64fe9e	TCGA-77-7338	2011-12-08	Lung Squamous Cell Carcinoma	NO	YES	MALE	WHITE	[Not Available]	[Not Available]	No	R-Upper	Peripheral Lung	Lung Squamous Cell Carcinoma- Not Otherwise Specified (NOS)	1995	[Not Available]	[Not Available]	R1	6th	T2	N0	M0	Stage IB	[Not Applicable]	[Not Applicable]	[Not Applicable]	[Not Applicable]	[Not Available]	[Not Available]	[Not Available]	[Not Available]	[Not Available]	[Not Available]	NO	[Not Available]	[Not Available]	NO	[Not Available]	NO	[Not Available]	No	[Not Available]	2	1952	[Not Available]	Dead	41.25	[Not Available]	1	Preoperative
2f4c473d-7a1a-4004-936c-8d4a7a24e212	TCGA-77-7463	2012-01-13	Lung Squamous Cell Carcinoma	NO	YES	MALE	WHITE	[Not Available]	[Not Available]	No	L-Upper	[Not Available]	Lung Squamous Cell Carcinoma- Not Otherwise Specified (NOS)	2001	[Not Available]	[Not Available]	R0	6th	T2	N0	M0	Stage IB	[Not Applicable]	[Not Applicable]	[Not Applicable]	[Not Applicable]	[Not Available]	[Not Available]	[Not Available]	[Not Available]	[Not Available]	[Not Available]	NO	[Not Available]	[Not Available]	NO	[Not Available]	NO	[Not Available]	No	[Not Available]	4	1954	1996	Dead	42	[Not Available]	1	Preoperative
188fe74b-a62b-47a0-9069-5c3a2837ee05	TCGA-77-7465	2012-01-13	Lung Squamous Cell Carcinoma	NO	YES	MALE	WHITE	[Not Available]	[Not Available]	No	R-Upper	[Not Available]	Lung Squamous Cell Carcinoma- Not Otherwise Specified (NOS)	2010	[Not Available]	[Not Available]	R0	7th	T2a	N1	M0	Stage IIA	[Not Applicable]	[Not Applicable]	[Not Applicable]	[Not Applicable]	NO	[Not Available]	[Not Available]	[Not Available]	[Not Available]	[Not Available]	NO	[Not Available]	[Not Available]	NO	[Not Available]	NO	[Not Available]	No	[Not Available]	2	1963	[Not Available]	Alive	120	[Not Available]	1	Preoperative
c7b23a5a-c49a-4426-bd4e-b191f4227ac6	TCGA-77-8007	2012-04-11	Lung Squamous Cell Carcinoma	NO	YES	MALE	[Not Available]	[Not Available]	[Not Available]	No	R-Upper	Central Lung	Lung Squamous Cell Carcinoma- Not Otherwise Specified (NOS)	2001	[Not Available]	[Not Available]	R0	6th	T2	N1	M0	Stage IIB	[Not Applicable]	[Not Applicable]	[Not Applicable]	[Not Applicable]	YES	79	[Not Available]	60	[Not Available]	84	NO	[Not Available]	[Not Available]	NO	[Not Available]	NO	[Not Available]	No	[Not Available]	2	1960	[Not Available]	Dead	100	[Not Available]	1	Preoperative
43ea8913-abfe-495d-a909-d57da13d1a27	TCGA-77-8008	2012-04-11	Lung Squamous Cell Carcinoma	NO	YES	MALE	[Not Available]	[Not Available]	[Not Available]	No	R-Lower	Central Lung	Lung Squamous Cell Carcinoma- Not Otherwise Specified (NOS)	2001	[Not Available]	[Not Available]	R0	6th	T2	N0	M0	Stage IB	[Not Applicable]	[Not Applicable]	[Not Applicable]	[Not Applicable]	YES	72	[Not Available]	66	[Not Available]	50	NO	[Not Available]	[Not Available]	NO	[Not Available]	NO	[Not Available]	No	[Not Available]	4	1945	1986	Dead	61.5	[Not Available]	1	Preoperative
9ea119ff-e5d9-49ec-b0a2-b21173c48044	TCGA-77-8009	2012-04-11	Lung Squamous Cell Carcinoma	NO	YES	MALE	[Not Available]	[Not Available]	[Not Available]	No	R-Lower	Central Lung	Lung Squamous Cell Carcinoma- Not Otherwise Specified (NOS)	2007	[Not Available]	[Not Available]	R0	6th	T2	N1	M0	Stage IIB	[Not Applicable]	[Not Applicable]	[Not Applicable]	[Not Applicable]	YES	75	[Not Available]	68	[Not Available]	102	NO	[Not Available]	[Not Available]	NO	[Not Available]	NO	[Not Available]	No	[Not Available]	4	1967	2006	Alive	97.5	[Not Available]	0	Preoperative
af008b10-38c1-40f2-a924-66c554813c50	TCGA-77-8128	2012-07-02	Lung Squamous Cell Carcinoma	NO	YES	MALE	[Not Evaluated]	[Not Evaluated]	[Not Available]	No	Other (please specify)	Central Lung	Lung Squamous Cell Carcinoma- Not Otherwise Specified (NOS)	1999	[Not Available]	[Not Available]	R0	6th	T2	N2	M0	Stage IIIA	[Not Applicable]	[Not Applicable]	[Not Applicable]	[Not Applicable]	YES	84	[Not Available]	64.2	[Not Available]	86	NO	[Not Available]	[Not Available]	NO	[Not Available]	NO	[Not Available]	No	[Not Available]	2	1953	[Not Available]	Dead	113	[Not Available]	[Unknown]	Preoperative
7fe0e47a-07e1-467b-b5dc-63e2a25ba6dd	TCGA-77-8130	2012-07-03	Lung Squamous Cell Carcinoma	NO	YES	MALE	[Not Evaluated]	[Not Evaluated]	[Not Available]	No	L-Upper	Central Lung	Lung Squamous Cell Carcinoma- Not Otherwise Specified (NOS)	2000	[Not Available]	[Not Available]	R0	6th	T2	N1	M0	Stage IIB	[Not Applicable]	[Not Applicable]	[Not Applicable]	[Not Applicable]	YES	66	[Not Available]	55.9	[Not Available]	91	NO	[Not Available]	[Not Available]	NO	[Not Available]	NO	[Not Available]	No	[Not Available]	4	1945	1996	Alive	32.25	[Not Available]	0	Preoperative
6d7803fd-cf8f-43dc-8b2d-fd129cdd2b3d	TCGA-77-8131	2012-06-19	Lung Squamous Cell Carcinoma	NO	YES	MALE	[Not Evaluated]	[Not Evaluated]	[Not Available]	No	L-Lower	Peripheral Lung	Lung Squamous Cell Carcinoma- Not Otherwise Specified (NOS)	2000	[Not Available]	[Not Available]	R0	6th	T2	NX	M0	Stage IB	[Not Applicable]	[Not Applicable]	[Not Applicable]	[Not Applicable]	YES	109	[Not Available]	76	[Not Available]	87	NO	[Not Available]	[Not Available]	NO	[Not Available]	NO	[Not Available]	No	[Not Available]	4	1941	1987	Dead	69	[Not Available]	1	Preoperative
becc8bb8-bdbf-426c-b9b6-a23558eb13c1	TCGA-77-8133	2012-07-03	Lung Squamous Cell Carcinoma	NO	YES	MALE	[Not Evaluated]	[Not Evaluated]	[Not Available]	No	Other (please specify)	Central Lung	Lung Squamous Cell Carcinoma- Not Otherwise Specified (NOS)	2001	[Not Available]	[Not Available]	R0	6th	T1	N1	M0	Stage IIA	[Not Applicable]	[Not Applicable]	[Not Applicable]	[Not Applicable]	YES	93	[Not Available]	77.4	[Not Available]	55	NO	[Not Available]	[Not Available]	NO	[Not Available]	NO	[Not Available]	No	[Not Available]	2	1941	[Not Available]	Dead	22	[Not Available]	0	Preoperative
c4ca7861-2fcc-4ed7-a240-bea9c43d5fb1	TCGA-77-8136	2012-07-03	Lung Squamous Cell Carcinoma	NO	YES	FEMALE	[Not Evaluated]	[Not Evaluated]	[Not Available]	No	Other (please specify)	Central Lung	Lung Squamous Cell Carcinoma- Not Otherwise Specified (NOS)	2002	[Not Available]	[Not Available]	R0	6th	T2	N1	M0	Stage IIB	[Not Applicable]	[Not Applicable]	[Not Applicable]	[Not Applicable]	YES	88	[Not Available]	64	[Not Available]	101	NO	[Not Available]	[Not Available]	NO	[Not Available]	NO	[Not Available]	No	[Not Available]	2	1947	[Not Available]	Dead	135	[Not Available]	0	Preoperative
283af87a-f962-47ab-8a7b-4fcd7e45cdf6	TCGA-77-8138	2012-07-26	Lung Squamous Cell Carcinoma	NO	YES	MALE	[Not Evaluated]	[Not Evaluated]	[Not Available]	No	L-Upper	Peripheral Lung	Lung Squamous Cell Carcinoma- Not Otherwise Specified (NOS)	2003	[Not Available]	[Not Available]	R0	6th	T2	N0	M0	Stage IB	[Not Applicable]	[Not Applicable]	[Not Applicable]	[Not Applicable]	YES	72	[Not Available]	60.9	[Not Available]	74	NO	[Not Available]	[Not Available]	NO	[Not Available]	NO	[Not Available]	No	[Not Available]	4	1946	2000	Dead	54	[Not Available]	0	Preoperative
1fdbeb6a-8c73-46db-9d21-c56a834064f6	TCGA-77-8139	2012-07-02	Lung Squamous Cell Carcinoma	NO	YES	MALE	[Not Evaluated]	[Not Evaluated]	[Not Available]	No	R-Upper	Peripheral Lung	Lung Squamous Cell Carcinoma- Not Otherwise Specified (NOS)	2003	[Not Available]	[Not Available]	R0	6th	T3	N0	M0	Stage IIB	[Not Applicable]	[Not Applicable]	[Not Applicable]	[Not Applicable]	YES	69	[Not Available]	60	[Not Available]	58	NO	[Not Available]	[Not Available]	NO	[Not Available]	NO	[Not Available]	No	[Not Available]	2	1951	[Not Available]	Alive	52	[Not Available]	0	Preoperative
463e921c-ec20-4263-ad24-bdc2d56edb56	TCGA-77-8140	2012-07-03	Lung Squamous Cell Carcinoma	NO	YES	FEMALE	[Not Evaluated]	[Not Evaluated]	[Not Available]	No	R-Lower	Peripheral Lung	Lung Squamous Cell Carcinoma- Not Otherwise Specified (NOS)	2003	[Not Available]	[Not Available]	R0	6th	T2	N1	M0	Stage IIB	[Not Applicable]	[Not Applicable]	[Not Applicable]	[Not Applicable]	YES	57	[Not Available]	52.3	[Not Available]	31	NO	[Not Available]	[Not Available]	NO	[Not Available]	NO	[Not Available]	No	[Not Available]	4	1962	2001	Dead	78	[Not Available]	0	Preoperative
ba42da22-44c2-488f-91f0-e274948b5cef	TCGA-77-8143	2012-07-02	Lung Squamous Cell Carcinoma	NO	YES	MALE	[Not Evaluated]	[Not Evaluated]	[Not Available]	No	L-Upper	Peripheral Lung	Lung Squamous Cell Carcinoma- Not Otherwise Specified (NOS)	2004	[Not Available]	[Not Available]	R0	6th	T2	N2	M0	Stage IIIA	[Not Applicable]	[Not Applicable]	[Not Applicable]	[Not Applicable]	YES	64	[Not Available]	54.4	[Not Available]	86	NO	[Not Available]	[Not Available]	NO	[Not Available]	NO	[Not Available]	No	[Not Available]	4	[Not Available]	[Not Available]	Dead	30	[Not Available]	1	Preoperative
86be9147-65f6-43f4-a3e9-5e5f422bd0ff	TCGA-77-8144	2012-07-03	Lung Squamous Cell Carcinoma	NO	YES	MALE	[Not Evaluated]	[Not Evaluated]	[Not Available]	No	L-Lower	Central Lung	Lung Squamous Cell Carcinoma- Not Otherwise Specified (NOS)	2004	[Not Available]	[Not Available]	R0	6th	T2	N0	M0	Stage IB	[Not Applicable]	[Not Applicable]	[Not Applicable]	[Not Applicable]	YES	71	[Not Available]	50.4	[Not Available]	73	NO	[Not Available]	[Not Available]	NO	[Not Available]	NO	[Not Available]	No	[Not Available]	2	1944	[Not Available]	Alive	59	[Not Available]	1	Preoperative
7ff92b3b-e810-42e2-9aa3-3e2335bb0f4a	TCGA-77-8145	2012-07-03	Lung Squamous Cell Carcinoma	NO	YES	MALE	[Not Evaluated]	[Not Evaluated]	[Not Available]	No	Other (please specify)	Central Lung	Lung Squamous Cell Carcinoma- Not Otherwise Specified (NOS)	2000	[Not Available]	[Not Available]	R1	6th	T4	N1	M0	Stage IIIB	[Not Applicable]	[Not Applicable]	[Not Applicable]	[Not Applicable]	YES	68	[Not Available]	48.6	[Not Available]	82	NO	[Not Available]	[Not Available]	NO	[Not Available]	NO	[Not Available]	No	[Not Available]	2	1943	[Not Available]	Dead	57	[Not Available]	0	Preoperative
636d0804-8a63-4bd0-86b4-dc1dc71da8b7	TCGA-77-8146	2012-07-03	Lung Squamous Cell Carcinoma	NO	YES	MALE	[Not Evaluated]	[Not Evaluated]	[Not Available]	No	R-Upper	Peripheral Lung	Lung Squamous Cell Carcinoma- Not Otherwise Specified (NOS)	2005	[Not Available]	[Not Available]	R0	6th	T1	N0	M0	Stage IA	[Not Applicable]	[Not Applicable]	[Not Applicable]	[Not Applicable]	YES	76	[Not Available]	76.5	[Not Available]	57	NO	[Not Available]	[Not Available]	NO	[Not Available]	NO	[Not Available]	No	[Not Available]	2	1954	[Not Available]	Alive	75	[Not Available]	0	Preoperative
8b55baf0-2d34-4cae-896d-641b1dd40785	TCGA-77-8148	2012-07-03	Lung Squamous Cell Carcinoma	NO	YES	MALE	[Not Evaluated]	[Not Evaluated]	[Not Available]	No	Other (please specify)	Central Lung	Lung Squamous Cell Carcinoma- Not Otherwise Specified (NOS)	2006	[Not Available]	[Not Available]	R0	6th	T3	N1	M0	Stage IIIA	[Not Applicable]	[Not Applicable]	[Not Applicable]	[Not Applicable]	YES	52	[Not Available]	67.6	[Not Available]	78	NO	[Not Available]	[Not Available]	NO	[Not Available]	NO	[Not Available]	No	[Not Available]	4	[Not Available]	1999	Alive	60	[Not Available]	1	Preoperative
7cc8892e-4ba5-4cf5-be76-9e5cb4891d25	TCGA-77-8150	2012-07-03	Lung Squamous Cell Carcinoma	NO	YES	MALE	[Not Evaluated]	[Not Evaluated]	[Not Available]	No	R-Lower	Central Lung	Lung Squamous Cell Carcinoma- Not Otherwise Specified (NOS)	2007	[Not Available]	[Not Available]	R0	6th	T3	N1	M0	Stage IIIA	[Not Applicable]	[Not Applicable]	[Not Applicable]	[Not Applicable]	YES	59	[Not Available]	59.6	[Not Available]	73	NO	[Not Available]	[Not Available]	NO	[Not Available]	NO	[Not Available]	No	[Not Available]	2	1961	[Not Available]	Dead	46	[Not Available]	0	Preoperative
3336ee77-a6f6-4d3a-93f9-585ebc48ffba	TCGA-77-8153	2012-10-23	Lung Squamous Cell Carcinoma	NO	YES	FEMALE	[Not Evaluated]	[Not Evaluated]	[Not Available]	No	R-Lower	Peripheral Lung	Lung Squamous Cell Carcinoma- Not Otherwise Specified (NOS)	2008	[Not Available]	[Not Available]	R0	6th	T2	N0	M0	Stage IB	[Not Applicable]	[Not Applicable]	[Not Applicable]	[Not Applicable]	YES	85	[Not Available]	70	[Not Available]	[Not Available]	NO	[Not Available]	[Not Available]	NO	[Not Available]	NO	[Not Available]	No	[Not Available]	3	1950	1975	Alive	25	[Not Available]	1	Preoperative
569691a3-15b4-4b1c-b8b7-b3ad17d0996e	TCGA-77-8154	2012-07-03	Lung Squamous Cell Carcinoma	NO	YES	MALE	[Not Evaluated]	[Unknown]	[Not Available]	No	R-Lower	Peripheral Lung	Lung Squamous Cell Carcinoma- Not Otherwise Specified (NOS)	2008	[Not Available]	[Not Available]	R0	6th	T1	N0	M0	Stage IA	[Not Applicable]	[Not Applicable]	[Not Applicable]	[Not Applicable]	YES	95	[Not Available]	69.6	[Not Available]	90	NO	[Not Available]	[Not Available]	NO	[Not Available]	NO	[Not Available]	No	[Not Available]	4	1966	2006	Alive	40	[Not Available]	1	Preoperative
96e31ca7-b917-4d04-804f-489243f6ee2b	TCGA-77-8156	2012-07-03	Lung Squamous Cell Carcinoma	NO	YES	MALE	[Not Evaluated]	[Not Evaluated]	[Not Available]	No	L-Upper	Central Lung	Lung Squamous Cell Carcinoma- Not Otherwise Specified (NOS)	2010	[Not Available]	[Not Available]	R0	7th	T2a	N0	M0	Stage IB	[Not Applicable]	[Not Applicable]	[Not Applicable]	[Not Applicable]	YES	65	[Not Available]	53	[Not Available]	43	NO	[Not Available]	[Not Available]	NO	[Not Available]	NO	[Not Available]	No	[Not Available]	2	1963	[Not Available]	Alive	57.5	[Not Available]	0	Preoperative
775808AB-4B30-4473-A9EE-4ED2C18CFC2B	TCGA-77-A5FZ	2013-06-19	Lung Squamous Cell Carcinoma	NO	YES	MALE	[Not Evaluated]	[Not Evaluated]	[Not Available]	No	L-Upper	Central Lung	Lung Papillary Squamous Cell Caricnoma	2001	[Not Available]	[Not Available]	R0	6th	T4	N0	M0	Stage IIIB	[Not Applicable]	[Not Applicable]	[Not Applicable]	[Not Applicable]	YES	89	[Not Available]	59	[Not Available]	71	NO	[Not Available]	[Not Available]	NO	[Not Available]	NO	[Not Available]	No	[Not Available]	4	1953	2000	Dead	141	[Not Available]	1	Preoperative
BF6BAB32-98BB-4E09-A7FE-C5C1779A5F60	TCGA-77-A5G1	2013-06-19	Lung Squamous Cell Carcinoma	NO	YES	MALE	[Not Evaluated]	[Not Evaluated]	[Not Available]	No	R-Lower	Central Lung	Lung Squamous Cell Carcinoma- Not Otherwise Specified (NOS)	2002	[Not Available]	[Not Available]	R0	6th	T3	N1	M0	Stage IIIA	[Not Applicable]	[Not Applicable]	[Not Applicable]	[Not Applicable]	YES	79	[Not Available]	67	[Not Available]	83	NO	[Not Available]	[Not Available]	NO	[Not Available]	NO	[Not Available]	No	[Not Available]	4	1942	1995	Alive	53	[Not Available]	0	Preoperative
B80CED5E-36B1-48D0-A8A9-0245AEB5F368	TCGA-77-A5G3	2013-06-19	Lung Squamous Cell Carcinoma	NO	YES	MALE	[Not Evaluated]	[Not Evaluated]	[Not Available]	No	Bronchial	Central Lung	Lung Squamous Cell Carcinoma- Not Otherwise Specified (NOS)	2002	[Not Available]	[Not Available]	R0	6th	T2	N1	M0	Stage IIB	[Not Applicable]	[Not Applicable]	[Not Applicable]	[Not Applicable]	YES	67	[Not Available]	57	[Not Available]	91	NO	[Not Available]	[Not Available]	NO	[Not Available]	NO	[Not Available]	No	[Not Available]	4	1959	1999	Alive	40	[Not Available]	1	Preoperative
17104D99-8838-4E1C-BD6A-7F1EE7A94BD8	TCGA-77-A5G6	2013-06-19	Lung Squamous Cell Carcinoma	NO	YES	MALE	[Not Evaluated]	[Not Evaluated]	[Not Available]	No	R-Upper	Peripheral Lung	Lung Squamous Cell Carcinoma- Not Otherwise Specified (NOS)	2009	[Not Available]	[Not Available]	R0	6th	T2	N2	M0	Stage IIIA	[Not Applicable]	[Not Applicable]	[Not Applicable]	[Not Applicable]	YES	53	[Not Available]	40	[Not Available]	56	NO	[Not Available]	[Not Available]	NO	[Not Available]	NO	[Not Available]	No	[Not Available]	2	1955	[Not Available]	Dead	74	[Not Available]	0	Preoperative
947B20AE-F6E3-497D-96D6-DB0B9CAB3C5A	TCGA-77-A5G7	2013-06-19	Lung Squamous Cell Carcinoma	NO	YES	MALE	[Not Evaluated]	[Not Evaluated]	[Not Available]	No	L-Upper	Peripheral Lung	Lung Squamous Cell Carcinoma- Not Otherwise Specified (NOS)	2009	[Not Available]	[Not Available]	R0	6th	T1	N0	M0	Stage IA	[Not Applicable]	[Not Applicable]	[Not Applicable]	[Not Applicable]	YES	95	[Not Available]	105	[Not Available]	[Not Available]	NO	[Not Available]	[Not Available]	NO	[Not Available]	NO	[Not Available]	No	[Not Available]	2	1963	[Not Available]	Dead	69	[Not Available]	1	Preoperative
6F068C19-62A6-46EF-8C54-701FD19A6416	TCGA-77-A5G8	2013-06-19	Lung Squamous Cell Carcinoma	NO	YES	MALE	[Not Evaluated]	[Not Evaluated]	[Not Available]	No	R-Upper	Peripheral Lung	Lung Squamous Cell Carcinoma- Not Otherwise Specified (NOS)	2009	[Not Available]	[Not Available]	R0	6th	T3	N0	M0	Stage IIB	[Not Applicable]	[Not Applicable]	[Not Applicable]	[Not Applicable]	YES	104	[Not Available]	64	[Not Available]	67	NO	[Not Available]	[Not Available]	NO	[Not Available]	NO	[Not Available]	No	[Not Available]	4	1949	2009	Alive	90	[Not Available]	0	Preoperative
CE137F49-D12B-4112-825A-E673545F54E5	TCGA-77-A5GA	2013-06-19	Lung Squamous Cell Carcinoma	NO	YES	MALE	[Not Evaluated]	[Not Evaluated]	[Not Available]	No	L-Upper	Central Lung	Lung Squamous Cell Carcinoma- Not Otherwise Specified (NOS)	2010	[Not Available]	[Not Available]	R0	7th	T2a	N0	M0	Stage IB	[Not Applicable]	[Not Applicable]	[Not Applicable]	[Not Applicable]	YES	132	[Not Available]	68	[Not Available]	42	NO	[Not Available]	[Not Available]	NO	[Not Available]	NO	[Not Available]	No	[Not Available]	3	1949	1982	Alive	99	[Not Available]	1	Preoperative
07083473-8835-4BF9-9F52-B15BBA59D932	TCGA-77-A5GB	2013-06-19	Lung Squamous Cell Carcinoma	NO	YES	MALE	[Not Evaluated]	[Not Evaluated]	[Not Available]	Yes, History of Prior Malignancy	Other (please specify)	Peripheral Lung	Lung Squamous Cell Carcinoma- Not Otherwise Specified (NOS)	2010	[Not Available]	[Not Available]	R0	7th	T2a	NX	M0	Stage IB	[Not Applicable]	[Not Applicable]	[Not Applicable]	[Not Applicable]	YES	103	[Not Available]	76	[Not Available]	72	NO	[Not Available]	[Not Available]	NO	[Not Available]	NO	[Not Available]	No	[Not Available]	2	1939	[Not Available]	Dead	52	[Not Available]	1	Preoperative
005669E5-1A31-45FB-AE97-9D450E74E7CB	TCGA-77-A5GF	2013-06-19	Lung Squamous Cell Carcinoma	NO	YES	MALE	[Not Evaluated]	[Not Evaluated]	[Not Available]	No	L-Lower	Peripheral Lung	Lung Squamous Cell Carcinoma- Not Otherwise Specified (NOS)	2011	[Not Available]	[Not Available]	R0	7th	T2a	N1	M0	Stage IIA	[Not Applicable]	[Not Applicable]	[Not Applicable]	[Not Applicable]	YES	78	[Not Available]	74	[Not Available]	[Not Available]	NO	[Not Available]	[Not Available]	NO	[Not Available]	NO	[Not Available]	No	[Not Available]	4	1956	1996	Alive	60	[Not Available]	0	Preoperative
A2CD5B01-A1F6-46D0-9F05-9DC3DF9019F7	TCGA-77-A5GH	2013-06-19	Lung Squamous Cell Carcinoma	NO	YES	MALE	[Not Evaluated]	[Not Evaluated]	[Not Available]	No	Other (please specify)	Peripheral Lung	Lung Squamous Cell Carcinoma- Not Otherwise Specified (NOS)	2011	[Not Available]	[Not Available]	R0	7th	T2a	N0	M0	Stage IB	[Not Applicable]	[Not Applicable]	[Not Applicable]	[Not Applicable]	YES	74	[Not Available]	69	[Not Available]	[Not Available]	NO	[Not Available]	[Not Available]	NO	[Not Available]	NO	[Not Available]	No	[Not Available]	3	1949	1990	Alive	11	[Not Available]	1	Preoperative
3f1b4356-0b53-48cd-8938-96fc786c9b63	TCGA-79-5596	2011-08-12	Lung Squamous Cell Carcinoma	NO	YES	MALE	[Not Available]	[Not Available]	[Not Available]	No	L-Upper	Peripheral Lung	Lung Squamous Cell Carcinoma- Not Otherwise Specified (NOS)	2006	[Not Available]	[Not Available]	R0	6th	T3	N1	M0	Stage IIIA	[Not Applicable]	[Not Applicable]	[Not Applicable]	[Not Applicable]	[Not Available]	[Not Available]	[Not Available]	[Not Available]	[Not Available]	[Not Available]	[Not Available]	[Not Available]	[Not Available]	[Not Available]	[Not Available]	[Not Available]	[Not Available]	No	[Not Available]	4	[Not Available]	2006	Alive	40	[Not Available]	1	Preoperative
2e007464-f3f4-4eb2-bab8-91b8272c96d1	TCGA-85-6175	2011-06-21	Lung Squamous Cell Carcinoma	YES	NO	FEMALE	WHITE	NOT HISPANIC OR LATINO	[Not Available]	No	L-Upper	Central Lung	Lung Squamous Cell Carcinoma- Not Otherwise Specified (NOS)	2010	[Not Available]	[Not Available]	R0	7th	T3	N0	M0	Stage IIB	[Not Applicable]	[Not Applicable]	[Not Applicable]	[Not Applicable]	NO	[Not Available]	[Not Available]	[Not Available]	[Not Available]	[Not Available]	NO	[Not Available]	[Not Available]	NO	[Not Available]	NO	[Not Available]	No	[Not Available]	1	[Not Available]	[Not Available]	Alive	[Not Available]	[Not Available]	[Not Available]	[Not Available]
870fb708-7631-4578-a470-3c7bd5228e5a	TCGA-85-6560	2011-08-31	Lung Squamous Cell Carcinoma	YES	NO	MALE	WHITE	NOT HISPANIC OR LATINO	[Not Available]	No	R-Upper	Peripheral Lung	Lung Squamous Cell Carcinoma- Not Otherwise Specified (NOS)	2011	[Not Available]	[Not Available]	R0	7th	T1b	N1	M0	Stage IIA	[Not Applicable]	[Not Applicable]	[Not Applicable]	[Not Applicable]	NO	[Not Available]	[Not Available]	[Not Available]	[Not Available]	[Not Available]	NO	[Not Available]	[Not Available]	[Not Available]	[Not Available]	[Not Available]	[Not Available]	No	[Not Available]	4	1970	2011	Alive	40	[Not Available]	[Not Available]	[Not Available]
46f35964-bd43-47e6-83fe-40da33828c94	TCGA-85-6561	2011-08-23	Lung Squamous Cell Carcinoma	YES	NO	MALE	WHITE	NOT HISPANIC OR LATINO	[Not Available]	No	R-Upper	Central Lung	Lung Squamous Cell Carcinoma- Not Otherwise Specified (NOS)	2011	[Not Available]	[Not Available]	R0	7th	T2a	NX	M0	Stage IB	[Not Applicable]	[Not Applicable]	[Not Applicable]	[Not Applicable]	NO	[Not Available]	[Not Available]	[Not Available]	[Not Available]	[Not Available]	NO	[Not Available]	[Not Available]	[Not Available]	[Not Available]	[Not Available]	[Not Available]	No	[Not Available]	4	1975	2000	Alive	35	[Not Available]	[Not Available]	[Not Available]
59b006b0-4a81-41c8-9574-29a732428e29	TCGA-85-6798	2011-08-25	Lung Squamous Cell Carcinoma	YES	NO	MALE	WHITE	NOT HISPANIC OR LATINO	[Not Available]	No	R-Upper	Central Lung	Lung Squamous Cell Carcinoma- Not Otherwise Specified (NOS)	2011	[Not Available]	[Not Available]	R0	7th	T3	N1	M0	Stage IIIA	[Not Applicable]	[Not Applicable]	[Not Applicable]	[Not Applicable]	NO	[Not Available]	[Not Available]	[Not Available]	[Not Available]	[Not Available]	NO	[Not Available]	[Not Available]	[Not Available]	[Not Available]	[Not Available]	[Not Available]	No	[Not Available]	2	1976	[Not Available]	Alive	35	[Not Available]	[Not Available]	[Not Available]
b89eaf49-b80b-4730-b928-3fbc4385b64c	TCGA-85-7696	2012-01-18	Lung Squamous Cell Carcinoma	YES	NO	MALE	WHITE	NOT HISPANIC OR LATINO	[Not Available]	No	L-Upper	Central Lung	Lung Squamous Cell Carcinoma- Not Otherwise Specified (NOS)	2011	[Not Available]	[Not Available]	R0	7th	T1	N0	M0	Stage IA	[Not Applicable]	[Not Applicable]	[Not Applicable]	[Not Applicable]	NO	[Not Available]	[Not Available]	[Not Available]	[Not Available]	[Not Available]	NO	[Not Available]	[Not Available]	[Not Available]	[Not Available]	[Not Available]	[Not Available]	No	[Not Available]	4	1970	2010	Alive	30	[Not Available]	[Not Available]	[Not Available]
caa36b5c-852b-4259-8db9-1091b1f02edd	TCGA-85-7697	2012-01-18	Lung Squamous Cell Carcinoma	YES	NO	MALE	WHITE	NOT HISPANIC OR LATINO	[Not Available]	No	L-Upper	Central Lung	Lung Squamous Cell Carcinoma- Not Otherwise Specified (NOS)	2011	[Not Available]	[Not Available]	R0	7th	T3	N0	M0	Stage IIB	[Not Applicable]	[Not Applicable]	[Not Applicable]	[Not Applicable]	NO	[Not Available]	[Not Available]	[Not Available]	[Not Available]	[Not Available]	NO	[Not Available]	[Not Available]	[Not Available]	[Not Available]	[Not Available]	[Not Available]	No	[Not Available]	3	1981	[Not Available]	Alive	30	[Not Available]	[Not Available]	[Not Available]
9a13a742-ff9a-4432-a7ce-7fcbb753be01	TCGA-85-7698	2011-01-18	Lung Squamous Cell Carcinoma	YES	NO	MALE	WHITE	NOT HISPANIC OR LATINO	[Not Available]	No	R-Upper	Central Lung	Lung Squamous Cell Carcinoma- Not Otherwise Specified (NOS)	2011	[Not Available]	[Not Available]	R0	7th	T1b	N0	M0	Stage IA	[Not Applicable]	[Not Applicable]	[Not Applicable]	[Not Applicable]	NO	[Not Available]	[Not Available]	[Not Available]	[Not Available]	[Not Available]	NO	[Not Available]	[Not Available]	[Not Available]	[Not Available]	[Not Available]	[Not Available]	No	[Not Available]	3	1967	[Not Available]	Alive	44	[Not Available]	[Not Available]	[Not Available]
06f36fce-f20f-4e37-8222-81a642c7bba0	TCGA-85-7699	2012-01-18	Lung Squamous Cell Carcinoma	YES	NO	MALE	WHITE	NOT HISPANIC OR LATINO	[Not Available]	No	L-Upper	Central Lung	Lung Squamous Cell Carcinoma- Not Otherwise Specified (NOS)	2011	[Not Available]	[Not Available]	R0	7th	T4	N0	M0	Stage IIIA	[Not Applicable]	[Not Applicable]	[Not Applicable]	[Not Applicable]	NO	[Not Available]	[Not Available]	[Not Available]	[Not Available]	[Not Available]	NO	[Not Available]	[Not Available]	[Not Available]	[Not Available]	[Not Available]	[Not Available]	No	[Not Available]	3	1953	1990	Alive	74	[Not Available]	[Not Available]	[Not Available]
9f55bb37-4211-4e91-88ea-7b1d4f286598	TCGA-85-7710	2011-12-21	Lung Squamous Cell Carcinoma	YES	NO	FEMALE	WHITE	NOT HISPANIC OR LATINO	[Not Available]	No	L-Lower	[Not Available]	Lung Squamous Cell Carcinoma- Not Otherwise Specified (NOS)	2011	[Not Available]	[Not Available]	[Not Available]	7th	T1b	N0	M0	Stage IA	[Not Applicable]	[Not Applicable]	[Not Applicable]	[Not Applicable]	NO	[Not Available]	[Not Available]	[Not Available]	[Not Available]	[Not Available]	NO	[Not Available]	[Not Available]	[Not Available]	[Not Available]	[Not Available]	[Not Available]	No	[Not Available]	2	1965	[Not Available]	Alive	45	[Not Available]	0	[Not Available]
01417822-b608-4934-8fe0-594315212be5	TCGA-85-7843	2012-02-20	Lung Squamous Cell Carcinoma	YES	NO	MALE	WHITE	NOT HISPANIC OR LATINO	[Not Available]	No	L-Upper	Central Lung	Lung Squamous Cell Carcinoma- Not Otherwise Specified (NOS)	2011	[Not Available]	[Not Available]	R0	7th	T2a	N1	M0	Stage IIA	[Not Applicable]	[Not Applicable]	[Not Applicable]	[Not Applicable]	NO	[Not Available]	[Not Available]	[Not Available]	[Not Available]	[Not Available]	NO	[Not Available]	[Not Available]	[Not Available]	[Not Available]	[Not Available]	[Not Available]	No	[Not Available]	2	1980	[Not Available]	Alive	35	80	2	[Not Available]
10d8e6ad-f7ef-4acf-a9c2-25834bea71c9	TCGA-85-7844	2012-02-20	Lung Squamous Cell Carcinoma	YES	NO	MALE	WHITE	NOT HISPANIC OR LATINO	[Not Available]	No	L-Upper	Central Lung	Lung Squamous Cell Carcinoma- Not Otherwise Specified (NOS)	2011	[Not Available]	[Not Available]	R0	7th	T2a	N0	M0	Stage IB	[Not Applicable]	[Not Applicable]	[Not Applicable]	[Not Applicable]	NO	[Not Available]	[Not Available]	[Not Available]	[Not Available]	[Not Available]	NO	[Not Available]	[Not Available]	NO	[Not Available]	[Not Available]	[Not Available]	No	[Not Available]	2	1970	[Not Available]	Alive	40	80	2	[Not Available]
ee54896d-0895-47fe-b432-ef922deba5d8	TCGA-85-7950	2012-03-14	Lung Squamous Cell Carcinoma	YES	NO	MALE	WHITE	NOT HISPANIC OR LATINO	[Not Available]	No	L-Upper	Central Lung	Lung Squamous Cell Carcinoma- Not Otherwise Specified (NOS)	2011	[Not Available]	[Not Available]	RX	7th	T2a	N0	M0	Stage IB	[Not Applicable]	[Not Applicable]	[Not Applicable]	[Not Applicable]	NO	[Not Available]	[Not Available]	[Not Available]	[Not Available]	[Not Available]	NO	[Not Available]	[Not Available]	NO	[Not Available]	[Not Available]	[Not Available]	No	[Not Available]	2	1984	[Not Available]	Alive	27	[Not Available]	[Not Available]	[Not Available]
90648a49-997b-418c-9724-bd1d216eb861	TCGA-85-8048	2012-05-09	Lung Squamous Cell Carcinoma	YES	NO	MALE	WHITE	NOT HISPANIC OR LATINO	[Not Available]	No	L-Lower	Peripheral Lung	Lung Squamous Cell Carcinoma- Not Otherwise Specified (NOS)	2011	[Not Available]	[Not Available]	R0	7th	T1	N0	M0	Stage IA	[Not Applicable]	[Not Applicable]	[Not Applicable]	[Not Applicable]	NO	[Not Available]	[Not Available]	[Not Available]	[Not Available]	[Not Available]	[Not Available]	[Not Available]	[Not Available]	[Not Available]	[Not Available]	[Not Available]	[Not Available]	No	[Not Available]	2	1960	[Not Available]	Alive	50	[Not Available]	[Not Available]	[Not Available]
f43b511b-93d1-4a6e-ab17-e84448a084b2	TCGA-85-8049	2012-05-09	Lung Squamous Cell Carcinoma	YES	NO	MALE	WHITE	NOT HISPANIC OR LATINO	[Not Available]	No	L-Lower	Central Lung	Lung Squamous Cell Carcinoma- Not Otherwise Specified (NOS)	2011	[Not Available]	[Not Available]	R0	7th	T2a	N0	M0	Stage IB	[Not Applicable]	[Not Applicable]	[Not Applicable]	[Not Applicable]	NO	[Not Available]	[Not Available]	[Not Available]	[Not Available]	[Not Available]	NO	[Not Available]	[Not Available]	NO	[Not Available]	NO	[Not Available]	No	[Not Available]	1	[Not Available]	[Not Available]	Alive	[Not Available]	[Not Available]	[Not Available]	[Not Available]
395babb3-3f5d-4e71-a675-af4443f23028	TCGA-85-8052	2012-05-09	Lung Squamous Cell Carcinoma	YES	NO	MALE	WHITE	NOT HISPANIC OR LATINO	[Not Available]	No	R-Upper	Peripheral Lung	Lung Squamous Cell Carcinoma- Not Otherwise Specified (NOS)	2011	[Not Available]	[Not Available]	R0	7th	T3	N0	M0	Stage IIB	[Not Applicable]	[Not Applicable]	[Not Applicable]	[Not Applicable]	NO	[Not Available]	[Not Available]	[Not Available]	[Not Available]	[Not Available]	NO	[Not Available]	[Not Available]	NO	[Not Available]	NO	[Not Available]	No	[Not Available]	2	1970	[Not Available]	Alive	40	[Not Available]	[Not Available]	[Not Available]
67f40b3a-882c-4ac9-9038-0e7b10a5ccdc	TCGA-85-8070	2012-05-16	Lung Squamous Cell Carcinoma	YES	NO	MALE	WHITE	NOT HISPANIC OR LATINO	[Not Available]	No	L-Upper	Peripheral Lung	Lung Squamous Cell Carcinoma- Not Otherwise Specified (NOS)	2011	[Not Available]	[Not Available]	R0	7th	T2	N0	M0	Stage IB	[Not Applicable]	[Not Applicable]	[Not Applicable]	[Not Applicable]	[Not Available]	[Not Available]	[Not Available]	[Not Available]	[Not Available]	[Not Available]	NO	[Not Available]	[Not Available]	NO	[Not Available]	NO	[Not Available]	No	[Not Available]	2	1960	[Not Available]	Alive	50	80	2	Preoperative
c652350b-9e6c-421d-8027-8b8819e4ac6c	TCGA-85-8071	2012-05-09	Lung Squamous Cell Carcinoma	YES	NO	MALE	WHITE	NOT HISPANIC OR LATINO	[Not Available]	No	R-Upper	Central Lung	Lung Squamous Cell Carcinoma- Not Otherwise Specified (NOS)	2011	[Not Available]	[Not Available]	R0	7th	T1a	N1	M0	Stage IIA	[Not Applicable]	[Not Applicable]	[Not Applicable]	[Not Applicable]	NO	[Not Available]	[Not Available]	[Not Available]	[Not Available]	[Not Available]	NO	[Not Available]	[Not Available]	NO	[Not Available]	NO	[Not Available]	No	[Not Available]	2	1981	[Not Available]	Alive	30	80	2	Preoperative
e29f886a-1690-438b-b287-bfe9e9737b29	TCGA-85-8072	2012-05-09	Lung Squamous Cell Carcinoma	YES	NO	MALE	WHITE	NOT HISPANIC OR LATINO	[Not Available]	No	L-Upper	Central Lung	Lung Squamous Cell Carcinoma- Not Otherwise Specified (NOS)	2011	[Not Available]	[Not Available]	R0	7th	T1a	N0	M0	Stage IA	[Not Applicable]	[Not Applicable]	[Not Applicable]	[Not Applicable]	NO	[Not Available]	[Not Available]	[Not Available]	[Not Available]	[Not Available]	NO	[Not Available]	[Not Available]	NO	[Not Available]	NO	[Not Available]	No	[Not Available]	2	1991	[Not Available]	Alive	15	100	0	Preoperative
aef2cf2f-2067-4d77-9bbe-0f6801826c31	TCGA-85-8276	2012-05-30	Lung Squamous Cell Carcinoma	YES	NO	MALE	WHITE	NOT HISPANIC OR LATINO	[Not Available]	No	L-Upper	Central Lung	Lung Squamous Cell Carcinoma- Not Otherwise Specified (NOS)	2011	[Not Available]	[Not Available]	R0	7th	T1b	N1	M0	Stage IIA	[Not Applicable]	[Not Applicable]	[Not Applicable]	[Not Applicable]	NO	[Not Available]	[Not Available]	[Not Available]	[Not Available]	[Not Available]	NO	[Not Available]	[Not Available]	[Not Available]	[Not Available]	[Not Available]	[Not Available]	No	[Not Available]	2	1971	[Not Available]	Alive	20	[Not Available]	[Not Available]	[Not Available]
8e6020a1-68df-4d57-ad4e-33acc0861fb3	TCGA-85-8277	2012-06-06	Lung Squamous Cell Carcinoma	YES	NO	MALE	WHITE	NOT HISPANIC OR LATINO	[Not Available]	No	L-Upper	[Not Available]	Lung Squamous Cell Carcinoma- Not Otherwise Specified (NOS)	2011	[Not Available]	[Not Available]	R0	7th	T3	N1	M0	Stage IIIA	[Not Applicable]	[Not Applicable]	[Not Applicable]	[Not Applicable]	[Not Available]	[Not Available]	[Not Available]	[Not Available]	[Not Available]	[Not Available]	[Not Available]	[Not Available]	[Not Available]	[Not Available]	[Not Available]	[Not Available]	[Not Available]	No	[Not Available]	1	[Not Available]	[Not Available]	Alive	[Not Available]	80	2	[Not Available]
484c6114-ea0b-4c00-9f50-74fd413bd6dc	TCGA-85-8287	2012-06-07	Lung Squamous Cell Carcinoma	YES	NO	MALE	WHITE	NOT HISPANIC OR LATINO	[Not Available]	No	L-Upper	Central Lung	Lung Squamous Cell Carcinoma- Not Otherwise Specified (NOS)	2011	[Not Available]	[Not Available]	R0	7th	T1b	N0	M0	Stage IA	[Not Applicable]	[Not Applicable]	[Not Applicable]	[Not Applicable]	NO	[Not Available]	[Not Available]	[Not Available]	[Not Available]	[Not Available]	NO	[Not Available]	[Not Available]	[Not Available]	[Not Available]	[Not Available]	[Not Available]	No	[Not Available]	2	1965	[Not Available]	Alive	50	90	0	Preoperative
186ca7d6-8354-43a2-b8a5-9ac79627331f	TCGA-85-8288	2012-06-19	Lung Squamous Cell Carcinoma	YES	NO	MALE	WHITE	NOT HISPANIC OR LATINO	[Not Available]	No	R-Middle	Central Lung	Lung Squamous Cell Carcinoma- Not Otherwise Specified (NOS)	2011	[Not Available]	[Not Available]	R0	7th	T1b	N1	M0	Stage IIA	[Not Applicable]	[Not Applicable]	[Not Applicable]	[Not Applicable]	NO	[Not Available]	[Not Available]	[Not Available]	[Not Available]	[Not Available]	NO	[Not Available]	[Not Available]	[Not Available]	[Not Available]	[Not Available]	[Not Available]	No	[Not Available]	2	1962	[Not Available]	Alive	50	70	0	[Not Available]
aa00283a-4a9e-4600-8046-43adc6833218	TCGA-85-8350	2012-07-16	Lung Squamous Cell Carcinoma	YES	NO	MALE	WHITE	NOT HISPANIC OR LATINO	[Not Available]	No	R-Upper	Peripheral Lung	Lung Squamous Cell Carcinoma- Not Otherwise Specified (NOS)	2011	[Not Available]	[Not Available]	R0	7th	T1b	N0	M0	Stage IA	[Not Applicable]	[Not Applicable]	[Not Applicable]	[Not Applicable]	[Not Available]	[Not Available]	[Not Available]	[Not Available]	[Not Available]	[Not Available]	NO	[Not Available]	[Not Available]	NO	[Not Available]	[Not Available]	[Not Available]	No	[Not Available]	2	1971	[Not Available]	Alive	40	[Not Available]	[Not Available]	[Not Available]
c935a05d-0bd5-4fad-8e06-950afe022bca	TCGA-85-8351	2012-07-17	Lung Squamous Cell Carcinoma	YES	NO	MALE	WHITE	NOT HISPANIC OR LATINO	[Not Available]	No	R-Lower	Peripheral Lung	Lung Squamous Cell Carcinoma- Not Otherwise Specified (NOS)	2011	[Not Available]	[Not Available]	R0	7th	T2a	N1	M0	Stage IIA	[Not Applicable]	[Not Applicable]	[Not Applicable]	[Not Applicable]	[Not Available]	[Not Available]	[Not Available]	[Not Available]	[Not Available]	[Not Available]	NO	[Not Available]	[Not Available]	NO	[Not Available]	[Not Available]	[Not Available]	No	[Not Available]	2	1951	[Not Available]	Alive	60	[Not Available]	[Not Available]	[Not Available]
159b96ab-2eb9-4604-be8c-e38f6aae103f	TCGA-85-8352	2012-08-14	Lung Squamous Cell Carcinoma	YES	NO	MALE	WHITE	NOT HISPANIC OR LATINO	[Not Available]	No	R-Upper	Peripheral Lung	Lung Squamous Cell Carcinoma- Not Otherwise Specified (NOS)	2011	[Not Available]	[Not Available]	R0	7th	T3	N1	M0	Stage IIIA	[Not Applicable]	[Not Applicable]	[Not Applicable]	[Not Applicable]	NO	[Not Available]	[Not Available]	[Not Available]	[Not Available]	[Not Available]	NO	[Not Available]	[Not Available]	[Not Available]	[Not Available]	[Not Available]	[Not Available]	No	[Not Available]	2	1962	[Not Available]	Alive	50	80	[Not Evaluated]	[Not Available]
4db53b4c-2e5c-45ea-8577-4360c114e0c1	TCGA-85-8353	2012-07-17	Lung Squamous Cell Carcinoma	YES	NO	MALE	WHITE	NOT HISPANIC OR LATINO	[Not Available]	No	R-Lower	Peripheral Lung	Lung Squamous Cell Carcinoma- Not Otherwise Specified (NOS)	2011	[Not Available]	[Not Available]	R0	7th	T3	N1	M0	Stage IIIA	[Not Applicable]	[Not Applicable]	[Not Applicable]	[Not Applicable]	NO	[Not Available]	[Not Available]	[Not Available]	[Not Available]	[Not Available]	NO	[Not Available]	[Not Available]	NO	[Not Available]	[Not Available]	[Not Available]	No	[Not Available]	2	1960	[Not Available]	Alive	50	70	[Not Evaluated]	[Not Available]
921daff1-65e7-4182-9822-04f48f0a178d	TCGA-85-8354	2012-08-14	Lung Squamous Cell Carcinoma	YES	NO	MALE	WHITE	NOT HISPANIC OR LATINO	[Not Available]	No	R-Lower	Peripheral Lung	Lung Squamous Cell Carcinoma- Not Otherwise Specified (NOS)	2011	[Not Available]	[Not Available]	R0	7th	T2a	N0	M0	Stage IB	[Not Applicable]	[Not Applicable]	[Not Applicable]	[Not Applicable]	NO	[Not Available]	[Not Available]	[Not Available]	[Not Available]	[Not Available]	NO	[Not Available]	[Not Available]	[Not Available]	[Not Available]	[Not Available]	[Not Available]	No	[Not Available]	2	1972	[Not Available]	Alive	30	70	[Not Evaluated]	[Unknown]
cf3cdd9e-43fc-44c7-90c8-e4e13deed9c6	TCGA-85-8355	2012-07-17	Lung Squamous Cell Carcinoma	YES	NO	MALE	WHITE	NOT HISPANIC OR LATINO	[Not Available]	No	L-Upper	Central Lung	Lung Squamous Cell Carcinoma- Not Otherwise Specified (NOS)	2011	[Not Available]	[Not Available]	R0	7th	T1a	N0	M0	Stage IA	[Not Applicable]	[Not Applicable]	[Not Applicable]	[Not Applicable]	[Not Available]	[Not Available]	[Not Available]	[Not Available]	[Not Available]	[Not Available]	[Unknown]	[Not Available]	[Not Available]	[Unknown]	[Not Available]	[Not Available]	[Not Available]	No	[Not Available]	1	[Not Available]	[Not Available]	Alive	[Not Available]	[Unknown]	[Unknown]	[Not Available]
806e9c81-a76f-42d1-bc4d-8687b950b980	TCGA-85-8479	2012-08-29	Lung Squamous Cell Carcinoma	YES	NO	MALE	WHITE	NOT HISPANIC OR LATINO	[Not Available]	No	L-Lower	Central Lung	Lung Papillary Squamous Cell Caricnoma	2012	[Not Available]	[Not Available]	R0	7th	T1a	N0	M0	Stage IA	[Not Applicable]	[Not Applicable]	[Not Applicable]	[Not Applicable]	NO	[Not Available]	[Not Available]	[Not Available]	[Not Available]	[Not Available]	NO	[Not Available]	[Not Available]	NO	[Not Available]	NO	[Not Available]	No	[Not Available]	4	[Not Available]	2010	Alive	90	80	1	Preoperative
2d2a3e24-8e1c-4409-a803-fe8d475f9248	TCGA-85-8481	2012-08-29	Lung Squamous Cell Carcinoma	YES	NO	MALE	WHITE	NOT HISPANIC OR LATINO	[Not Available]	No	L-Upper	Peripheral Lung	Lung Papillary Squamous Cell Caricnoma	2012	[Not Available]	[Not Available]	R0	7th	T3	N0	M0	Stage IIB	[Not Applicable]	[Not Applicable]	[Not Applicable]	[Not Applicable]	NO	[Not Available]	[Not Available]	[Not Available]	[Not Available]	[Not Available]	NO	[Not Available]	[Not Available]	NO	[Not Available]	NO	[Not Available]	No	[Not Available]	4	[Not Available]	2008	Alive	80	70	2	Preoperative
6205bb0d-f5ad-4181-a62b-5cb21415ff8e	TCGA-85-8580	2012-08-29	Lung Squamous Cell Carcinoma	YES	NO	FEMALE	WHITE	NOT HISPANIC OR LATINO	[Not Available]	No	R-Lower	[Unknown]	Lung Squamous Cell Carcinoma- Not Otherwise Specified (NOS)	2012	[Not Available]	[Not Available]	R0	7th	T2a	N0	M0	Stage IB	[Not Applicable]	[Not Applicable]	[Not Applicable]	[Not Applicable]	NO	[Not Available]	[Not Available]	[Not Available]	[Not Available]	[Not Available]	NO	[Not Available]	[Not Available]	NO	[Not Available]	NO	[Not Available]	No	[Not Available]	4	1973	2011	Alive	38	[Not Available]	[Not Available]	[Not Available]
b4dc4f02-ef59-4c23-bfea-815255bb6427	TCGA-85-8582	2012-08-29	Lung Squamous Cell Carcinoma	YES	NO	MALE	WHITE	NOT HISPANIC OR LATINO	[Not Available]	No	L-Upper	Central Lung	Lung Squamous Cell Carcinoma- Not Otherwise Specified (NOS)	2012	[Not Available]	[Not Available]	R0	7th	T1a	N0	M0	Stage IA	[Not Applicable]	[Not Applicable]	[Not Applicable]	[Not Applicable]	NO	[Not Available]	[Not Available]	[Not Available]	[Not Available]	[Not Available]	NO	[Not Available]	[Not Available]	NO	[Not Available]	NO	[Not Available]	No	[Not Available]	2	[Not Available]	[Not Available]	Alive	40	[Unknown]	[Unknown]	[Unknown]
52924e27-7b36-4e25-83b2-abc51dd72668	TCGA-85-8584	2012-08-29	Lung Squamous Cell Carcinoma	YES	NO	MALE	WHITE	NOT HISPANIC OR LATINO	[Not Available]	No	R-Upper	Central Lung	Lung Papillary Squamous Cell Caricnoma	2012	[Not Available]	[Not Available]	R0	7th	T2a	N1	M0	Stage IIA	[Not Applicable]	[Not Applicable]	[Not Applicable]	[Not Applicable]	NO	[Not Available]	[Not Available]	[Not Available]	[Not Available]	[Not Available]	NO	[Not Available]	[Not Available]	NO	[Not Available]	NO	[Not Available]	No	[Not Available]	2	[Not Available]	[Not Available]	Alive	50	90	1	Preoperative
f30d81c6-d8d3-4547-b056-3942e390b936	TCGA-85-8664	2012-08-29	Lung Squamous Cell Carcinoma	YES	NO	MALE	WHITE	NOT HISPANIC OR LATINO	[Not Available]	No	R-Upper	[Unknown]	Lung Squamous Cell Carcinoma- Not Otherwise Specified (NOS)	2011	[Not Available]	[Not Available]	R0	7th	T2b	N1	M0	Stage IIB	[Not Applicable]	[Not Applicable]	[Not Applicable]	[Not Applicable]	NO	[Not Available]	[Not Available]	[Not Available]	[Not Available]	[Not Available]	[Not Available]	[Not Available]	[Not Available]	[Not Available]	[Not Available]	[Not Available]	[Not Available]	No	[Not Available]	2	1961	[Not Available]	Alive	60	[Unknown]	[Unknown]	[Not Available]
34f7b63b-7a49-4b29-ab72-d880d87fb7b3	TCGA-85-8666	2012-08-29	Lung Squamous Cell Carcinoma	YES	NO	MALE	WHITE	NOT HISPANIC OR LATINO	[Not Available]	No	L-Upper	[Unknown]	Lung Squamous Cell Carcinoma- Not Otherwise Specified (NOS)	2011	[Not Available]	[Not Available]	R0	7th	T2a	N0	M0	Stage IB	[Not Applicable]	[Not Applicable]	[Not Applicable]	[Not Applicable]	NO	[Not Available]	[Not Available]	[Not Available]	[Not Available]	[Not Available]	[Not Available]	[Not Available]	[Not Available]	[Not Available]	[Not Available]	NO	[Not Available]	No	[Not Available]	2	1967	[Not Available]	Alive	55	[Unknown]	[Unknown]	[Not Available]
86958F1D-F10B-403E-B204-061E1932A793	TCGA-85-A4CL	2013-02-05	Lung Squamous Cell Carcinoma	YES	NO	MALE	WHITE	NOT HISPANIC OR LATINO	[Not Available]	No	R-Lower	Central Lung	Lung Squamous Cell Carcinoma- Not Otherwise Specified (NOS)	2012	[Not Available]	[Not Available]	R0	7th	T1b	N0	M0	Stage IA	[Not Applicable]	[Not Applicable]	[Not Applicable]	[Not Applicable]	NO	[Not Available]	[Not Available]	[Not Available]	[Not Available]	[Not Available]	NO	[Not Available]	[Not Available]	NO	[Not Available]	NO	[Not Available]	No	[Not Available]	2	1970	[Not Available]	Alive	40	[Unknown]	[Unknown]	[Unknown]
67E92755-396E-4D9A-B737-979EADC743F9	TCGA-85-A4CN	2012-12-06	Lung Squamous Cell Carcinoma	YES	NO	FEMALE	WHITE	NOT HISPANIC OR LATINO	[Not Available]	No	L-Lower	Peripheral Lung	Lung Squamous Cell Carcinoma- Not Otherwise Specified (NOS)	2012	[Not Available]	[Not Available]	R0	7th	T2b	N1	M0	Stage IIB	[Not Applicable]	[Not Applicable]	[Not Applicable]	[Not Applicable]	NO	[Not Available]	[Not Available]	[Not Available]	[Not Available]	[Not Available]	NO	[Not Available]	[Not Available]	NO	[Not Available]	NO	[Not Available]	No	[Not Available]	4	[Not Available]	2008	Alive	[Not Available]	90	1	Preoperative
264B3066-B77B-4375-9847-ADCF22DBC438	TCGA-85-A4JB	2013-02-06	Lung Squamous Cell Carcinoma	YES	NO	MALE	WHITE	NOT HISPANIC OR LATINO	[Not Available]	No	R-Upper	Central Lung	Lung Squamous Cell Carcinoma- Not Otherwise Specified (NOS)	2012	[Not Available]	[Not Available]	R0	7th	T3	N0	M0	Stage IIB	[Not Applicable]	[Not Applicable]	[Not Applicable]	[Not Applicable]	NO	[Not Available]	[Not Available]	[Not Available]	[Not Available]	[Not Available]	NO	[Not Available]	[Not Available]	NO	[Not Available]	NO	[Not Available]	No	[Not Available]	2	[Not Available]	[Not Available]	Alive	25	70	2	Preoperative
4CDAC0CF-6598-4D33-92E6-730FBDC88A61	TCGA-85-A4JC	2013-02-06	Lung Squamous Cell Carcinoma	YES	NO	MALE	WHITE	NOT HISPANIC OR LATINO	[Not Available]	No	L-Upper	Central Lung	Lung Squamous Cell Carcinoma- Not Otherwise Specified (NOS)	2012	[Not Available]	[Not Available]	R0	7th	T2b	N0	M0	Stage IIA	[Not Applicable]	[Not Applicable]	[Not Applicable]	[Not Applicable]	YES	73.6	[Not Available]	68.4	[Not Available]	[Not Available]	NO	[Not Available]	[Not Available]	NO	[Not Available]	NO	[Not Available]	No	[Not Available]	2	[Not Available]	[Not Available]	Alive	25	90	1	Preoperative
6ACDB5E1-4F4D-4512-A41B-CEEC94B82744	TCGA-85-A4PA	2013-02-06	Lung Squamous Cell Carcinoma	YES	NO	MALE	WHITE	NOT HISPANIC OR LATINO	[Not Available]	No	L-Lower	Central Lung	Lung Squamous Cell Carcinoma- Not Otherwise Specified (NOS)	2012	[Not Available]	[Not Available]	R0	7th	T2a	N0	M0	Stage IB	[Not Applicable]	[Not Applicable]	[Not Applicable]	[Not Applicable]	NO	[Not Available]	[Not Available]	[Not Available]	[Not Available]	[Not Available]	NO	[Not Available]	[Not Available]	NO	[Not Available]	NO	[Not Available]	No	[Not Available]	4	1972	2012	Alive	40	[Unknown]	[Unknown]	[Unknown]
E5987342-BF04-457C-9785-74532CE26834	TCGA-85-A4QQ	2013-03-01	Lung Squamous Cell Carcinoma	YES	NO	MALE	WHITE	NOT HISPANIC OR LATINO	[Not Available]	No	R-Lower	Central Lung	Lung Squamous Cell Carcinoma- Not Otherwise Specified (NOS)	2012	[Not Available]	[Not Available]	R0	7th	T2a	N0	M0	Stage IB	[Not Applicable]	[Not Applicable]	[Not Applicable]	[Not Applicable]	NO	[Not Available]	[Not Available]	[Not Available]	[Not Available]	[Not Available]	NO	[Not Available]	[Not Available]	NO	[Not Available]	NO	[Not Available]	No	[Not Available]	2	1960	[Not Available]	Alive	50	[Not Evaluated]	[Not Evaluated]	[Not Evaluated]
06B70DEE-14D2-45C7-B6F0-4D1D29C575EA	TCGA-85-A4QR	2013-03-01	Lung Squamous Cell Carcinoma	YES	NO	MALE	WHITE	NOT HISPANIC OR LATINO	[Not Available]	No	R-Upper	Central Lung	Lung Squamous Cell Carcinoma- Not Otherwise Specified (NOS)	2012	[Not Available]	[Not Available]	R0	7th	T2a	N0	M0	Stage IB	[Not Applicable]	[Not Applicable]	[Not Applicable]	[Not Applicable]	NO	[Not Available]	[Not Available]	[Not Available]	[Not Available]	[Not Available]	NO	[Not Available]	[Not Available]	NO	[Not Available]	NO	[Not Available]	No	[Not Available]	4	1961	2011	Alive	50	[Unknown]	[Not Evaluated]	[Not Evaluated]
6D991DE7-8BFB-40A6-9070-EDEA041BD782	TCGA-85-A50M	2013-02-19	Lung Squamous Cell Carcinoma	YES	NO	MALE	ASIAN	NOT HISPANIC OR LATINO	[Not Available]	No	R-Upper	Peripheral Lung	Lung Squamous Cell Carcinoma- Not Otherwise Specified (NOS)	2012	[Not Available]	[Not Available]	R0	7th	T2b	N0	M0	Stage IIA	[Not Applicable]	[Not Applicable]	[Not Applicable]	[Not Applicable]	NO	[Not Available]	[Not Available]	[Not Available]	[Not Available]	[Not Available]	NO	[Not Available]	[Not Available]	NO	[Not Available]	NO	[Not Available]	No	[Not Available]	4	1997	2012	Alive	15	[Not Evaluated]	[Not Evaluated]	[Not Evaluated]
8A0F8D00-86A0-4C63-A8D5-43BD2E13BD96	TCGA-85-A50Z	2013-03-08	Lung Squamous Cell Carcinoma	YES	NO	MALE	WHITE	NOT HISPANIC OR LATINO	[Not Available]	No	R-Upper	Peripheral Lung	Lung Squamous Cell Carcinoma- Not Otherwise Specified (NOS)	2012	[Not Available]	[Not Available]	R0	7th	T2b	N0	M0	Stage IIA	[Not Applicable]	[Not Applicable]	[Not Applicable]	[Not Applicable]	NO	[Not Available]	[Not Available]	[Not Available]	[Not Available]	[Not Available]	NO	[Not Available]	[Not Available]	[Not Available]	[Not Available]	[Not Available]	[Not Available]	No	[Not Available]	2	1973	[Not Available]	Alive	45	90	0	Preoperative
BF57D48C-ED43-4C3D-A689-8F60EF023372	TCGA-85-A510	2013-03-08	Lung Squamous Cell Carcinoma	YES	NO	FEMALE	WHITE	NOT HISPANIC OR LATINO	[Not Available]	No	L-Lower	Peripheral Lung	Lung Squamous Cell Carcinoma- Not Otherwise Specified (NOS)	2012	[Not Available]	[Not Available]	R0	7th	T2b	N1	M0	Stage IIB	[Not Applicable]	[Not Applicable]	[Not Applicable]	[Not Applicable]	NO	[Not Available]	[Not Available]	[Not Available]	[Not Available]	[Not Available]	NO	[Not Available]	[Not Available]	NO	[Not Available]	NO	[Not Available]	No	[Not Available]	2	1967	[Not Available]	Alive	45	100	0	Preoperative
D40B3520-708D-430B-A302-D4DC6970ADBF	TCGA-85-A511	2013-03-08	Lung Squamous Cell Carcinoma	YES	NO	MALE	WHITE	NOT HISPANIC OR LATINO	[Not Available]	No	L-Lower	Peripheral Lung	Lung Squamous Cell Carcinoma- Not Otherwise Specified (NOS)	2012	[Not Available]	[Not Available]	R0	7th	T2b	N1	M0	Stage IIB	[Not Applicable]	[Not Applicable]	[Not Applicable]	[Not Applicable]	NO	[Not Available]	[Not Available]	[Not Available]	[Not Available]	[Not Available]	NO	[Not Available]	[Not Available]	NO	[Not Available]	NO	[Not Available]	No	[Not Available]	2	1972	[Not Available]	Alive	40	90	[Not Evaluated]	Preoperative
BCB6447F-3E4C-44FE-AFC3-100D5DBE9BA2	TCGA-85-A512	2013-03-08	Lung Squamous Cell Carcinoma	YES	NO	MALE	WHITE	NOT HISPANIC OR LATINO	[Not Available]	No	L-Upper	Central Lung	Lung Squamous Cell Carcinoma- Not Otherwise Specified (NOS)	2012	[Not Available]	[Not Available]	R0	7th	T1b	N1	M0	Stage IIA	[Not Applicable]	[Not Applicable]	[Not Applicable]	[Not Applicable]	NO	[Not Available]	[Not Available]	[Not Available]	[Not Available]	[Not Available]	NO	[Not Available]	[Not Available]	NO	[Not Available]	NO	[Not Available]	No	[Not Available]	2	1987	[Not Available]	Alive	25	90	[Not Evaluated]	Preoperative
7F8130D2-F169-451B-A263-547ADC2FCB2C	TCGA-85-A513	2013-03-08	Lung Squamous Cell Carcinoma	YES	NO	FEMALE	ASIAN	NOT HISPANIC OR LATINO	[Not Available]	No	L-Upper	Peripheral Lung	Lung Squamous Cell Carcinoma- Not Otherwise Specified (NOS)	2012	[Not Available]	[Not Available]	R0	7th	T1a	NX	M0	Stage IA	[Not Applicable]	[Not Applicable]	[Not Applicable]	[Not Applicable]	NO	[Not Available]	[Not Available]	[Not Available]	[Not Available]	[Not Available]	NO	[Not Available]	[Not Available]	NO	[Not Available]	NO	[Not Available]	No	[Not Available]	1	[Not Available]	[Not Available]	Alive	[Not Available]	[Not Evaluated]	[Not Evaluated]	[Not Available]
8A933B93-87B3-4F1F-8EF1-1D095CEA032E	TCGA-85-A53L	2013-03-18	Lung Squamous Cell Carcinoma	YES	NO	MALE	ASIAN	NOT HISPANIC OR LATINO	[Not Available]	No	R-Middle	Peripheral Lung	Lung Squamous Cell Carcinoma- Not Otherwise Specified (NOS)	2012	[Not Available]	[Not Available]	R0	7th	T2b	N0	M0	Stage IIA	[Not Applicable]	[Not Applicable]	[Not Applicable]	[Not Applicable]	NO	[Not Available]	[Not Available]	[Not Available]	[Not Available]	[Not Available]	NO	[Not Available]	[Not Available]	NO	[Not Available]	NO	[Not Available]	No	[Not Available]	4	1970	2000	Alive	30	[Not Evaluated]	[Not Evaluated]	[Not Available]
D1CEA7B9-9BA9-4461-BA9E-9B45B6F5AF66	TCGA-85-A5B5	2013-05-23	Lung Squamous Cell Carcinoma	YES	NO	MALE	WHITE	NOT HISPANIC OR LATINO	[Not Available]	No	R-Upper	Central Lung	Lung Squamous Cell Carcinoma- Not Otherwise Specified (NOS)	2012	[Not Available]	[Not Available]	R0	7th	T1b	N0	M0	Stage IA	[Not Applicable]	[Not Applicable]	[Not Applicable]	[Not Applicable]	NO	[Not Available]	[Not Available]	[Not Available]	[Not Available]	[Not Available]	NO	[Not Available]	[Not Available]	NO	[Not Available]	NO	[Not Available]	No	[Not Available]	4	1982	2011	Alive	15	[Not Evaluated]	[Not Evaluated]	[Not Evaluated]
0e515ab8-99f9-43d9-a621-8fe9ede828ec	TCGA-90-6837	2011-07-13	Lung Squamous Cell Carcinoma	YES	NO	MALE	WHITE	NOT HISPANIC OR LATINO	[Not Available]	No	R-Upper	[Not Available]	Lung Squamous Cell Carcinoma- Not Otherwise Specified (NOS)	2011	[Not Available]	[Not Available]	R0	7th	T3	N0	MX	Stage IIB	[Not Applicable]	[Not Applicable]	[Not Applicable]	[Not Applicable]	NO	[Not Available]	[Not Available]	[Not Available]	[Not Available]	[Not Available]	NO	[Not Available]	[Not Available]	[Not Available]	[Not Available]	[Not Available]	[Not Available]	No	[Not Available]	4	[Not Available]	2009	Alive	40	[Not Available]	0	Other
3fdf941e-40ec-43b6-b6e3-31a0861bd5b8	TCGA-90-7766	2012-01-24	Lung Squamous Cell Carcinoma	YES	NO	FEMALE	WHITE	NOT HISPANIC OR LATINO	[Not Available]	Yes	R-Upper	[Not Available]	Lung Squamous Cell Carcinoma- Not Otherwise Specified (NOS)	2011	[Not Available]	[Not Available]	R0	7th	T1b	N0	MX	Stage IA	[Not Applicable]	[Not Applicable]	[Not Applicable]	[Not Applicable]	NO	[Not Available]	[Not Available]	[Not Available]	[Not Available]	[Not Available]	NO	[Not Available]	[Not Available]	NO	[Not Available]	NO	[Not Available]	No	[Not Available]	2	1981	[Not Available]	Alive	30	[Not Available]	[Not Available]	[Not Available]
9dff11cd-0784-4a60-9c77-43f8957d3dfa	TCGA-90-7767	2012-02-09	Lung Squamous Cell Carcinoma	YES	NO	MALE	WHITE	NOT HISPANIC OR LATINO	[Not Available]	No	R-Upper	[Not Available]	Lung Squamous Cell Carcinoma- Not Otherwise Specified (NOS)	2011	[Not Available]	[Not Available]	R0	7th	T2b	N1	MX	Stage IIB	[Not Applicable]	[Not Applicable]	[Not Applicable]	[Not Applicable]	NO	[Not Available]	[Not Available]	[Not Available]	[Not Available]	[Not Available]	NO	[Not Available]	[Not Available]	NO	[Not Available]	NO	[Not Available]	No	[Not Available]	3	1981	1991	Alive	25	[Not Available]	1	Other
761d1c28-d5f5-497c-b9a0-86263ec62979	TCGA-90-7769	2012-01-24	Lung Squamous Cell Carcinoma	YES	NO	MALE	WHITE	NOT HISPANIC OR LATINO	[Not Available]	No	[Not Available]	[Not Available]	Lung Squamous Cell Carcinoma- Not Otherwise Specified (NOS)	2011	[Not Available]	[Not Available]	R0	7th	T2b	N1	MX	Stage IIB	[Not Applicable]	[Not Applicable]	[Not Applicable]	[Not Applicable]	YES	52	53	62	59	66	NO	[Not Available]	[Not Available]	NO	[Not Available]	NO	[Not Available]	No	[Not Available]	3	1971	1995	Alive	36	[Not Available]	1	Preoperative
6e6b8596-76aa-49f5-a997-46ebc0e43934	TCGA-90-7964	2012-04-10	Lung Squamous Cell Carcinoma	YES	NO	MALE	WHITE	NOT HISPANIC OR LATINO	[Not Available]	Yes	R-Upper	[Not Available]	Lung Squamous Cell Carcinoma- Not Otherwise Specified (NOS)	2011	[Not Available]	[Not Available]	R0	7th	T2a	N0	MX	Stage IB	[Not Applicable]	[Not Applicable]	[Not Applicable]	[Not Applicable]	YES	60	64	61	60	40	NO	[Not Available]	[Not Available]	NO	[Not Available]	NO	[Not Available]	No	[Not Available]	4	1951	2011	Alive	180	[Not Available]	2	Post-Adjuvant Therapy
75AB9203-30FA-4F1A-B8F2-AA61E02111F5	TCGA-90-A4ED	2013-04-04	Lung Squamous Cell Carcinoma	YES	NO	MALE	WHITE	NOT HISPANIC OR LATINO	[Not Available]	No	R-Upper	[Unknown]	Lung Squamous Cell Carcinoma- Not Otherwise Specified (NOS)	2012	[Not Available]	[Not Available]	[Not Evaluated]	7th	T2a	N0	MX	Stage IB	[Not Applicable]	[Not Applicable]	[Not Applicable]	[Not Applicable]	YES	[Not Available]	125	[Not Available]	[Not Available]	63	NO	[Not Available]	[Not Available]	NO	[Not Available]	NO	[Not Available]	No	[Not Available]	3	1972	1992	Alive	30	[Unknown]	0	Preoperative
AA02AA9B-5786-463F-9DB4-A9C20D31DC73	TCGA-90-A4EE	2013-04-04	Lung Squamous Cell Carcinoma	YES	NO	MALE	WHITE	NOT HISPANIC OR LATINO	[Not Available]	No	Bronchial	[Unknown]	Lung Squamous Cell Carcinoma- Not Otherwise Specified (NOS)	2012	[Not Available]	[Not Available]	[Not Evaluated]	7th	T2a	N1	MX	Stage IIA	[Not Applicable]	[Not Applicable]	[Not Applicable]	[Not Applicable]	YES	[Not Available]	60	[Not Available]	60	45	YES	YES	Other	YES	Other	YES	[Not Available]	No	[Not Available]	2	1978	[Not Available]	Alive	68	[Unknown]	[Unknown]	[Not Available]
80242454-84B3-4FBA-A64B-7D1714CDECDE	TCGA-90-A59Q	2013-07-10	Lung Squamous Cell Carcinoma	YES	NO	FEMALE	WHITE	NOT HISPANIC OR LATINO	[Not Available]	No	R-Upper	[Unknown]	Lung Squamous Cell Carcinoma- Not Otherwise Specified (NOS)	2012	[Not Available]	[Not Available]	R0	7th	T2a	N1	MX	Stage IIA	[Not Applicable]	[Not Applicable]	[Not Applicable]	[Not Applicable]	YES	[Not Available]	94	[Not Available]	[Not Available]	84	NO	[Not Available]	[Not Available]	NO	[Not Available]	[Not Available]	[Not Available]	No	[Not Available]	2	1972	[Not Available]	Alive	80	[Not Evaluated]	1	Post-Adjuvant Therapy
86b165c2-d0e6-4a4f-84ed-aa95e3133627	TCGA-92-7340	2011-11-14	Lung Squamous Cell Carcinoma	YES	NO	FEMALE	WHITE	NOT HISPANIC OR LATINO	[Not Available]	No	R-Upper	Central Lung	Lung Squamous Cell Carcinoma- Not Otherwise Specified (NOS)	2011	[Not Available]	[Not Available]	R1	7th	T2a	N1	MX	Stage IIA	[Not Applicable]	[Not Applicable]	[Not Applicable]	[Not Applicable]	[Not Available]	[Not Available]	[Not Available]	[Not Available]	[Not Available]	[Not Available]	NO	[Not Available]	[Not Available]	NO	[Not Available]	NO	[Not Available]	No	[Not Available]	4	1985	2000	Alive	15	80	2	Preoperative
23421041-fc75-4610-8a59-3246fb6df7e8	TCGA-92-7341	2011-11-14	Lung Squamous Cell Carcinoma	YES	NO	MALE	WHITE	NOT HISPANIC OR LATINO	[Not Available]	No	R-Upper	Central Lung	Lung Squamous Cell Carcinoma- Not Otherwise Specified (NOS)	2011	[Not Available]	[Not Available]	R0	7th	T2a	N0	MX	Stage IB	[Not Applicable]	[Not Applicable]	[Not Applicable]	[Not Applicable]	[Not Available]	[Not Available]	[Not Available]	[Not Available]	[Not Available]	[Not Available]	NO	[Not Available]	[Not Available]	NO	[Not Available]	NO	[Not Available]	No	[Not Available]	2	1961	[Not Available]	Alive	50	100	0	Preoperative
418a004e-d5a9-461b-8764-4b581b6b8223	TCGA-92-8063	2012-05-18	Lung Squamous Cell Carcinoma	YES	NO	MALE	WHITE	NOT HISPANIC OR LATINO	[Not Available]	No	L-Upper	Central Lung	Lung Squamous Cell Carcinoma- Not Otherwise Specified (NOS)	2011	[Not Available]	[Not Available]	RX	7th	T2b	N2	MX	Stage IIIA	[Not Applicable]	[Not Applicable]	[Not Applicable]	[Not Applicable]	YES	84	91	78	82	76	NO	[Not Available]	[Not Available]	NO	[Not Available]	NO	[Not Available]	No	[Not Available]	2	1975	[Not Available]	Alive	74	90	1	Preoperative
dc6ceece-efaa-4b9d-9e12-d35863d7a902	TCGA-92-8064	2012-05-18	Lung Squamous Cell Carcinoma	YES	NO	MALE	WHITE	NOT HISPANIC OR LATINO	[Not Available]	No	R-Upper	Central Lung	Lung Squamous Cell Carcinoma- Not Otherwise Specified (NOS)	2011	[Not Available]	[Not Available]	RX	7th	T2b	N0	MX	[Discrepancy]	[Not Applicable]	[Not Applicable]	[Not Applicable]	[Not Applicable]	YES	47	55	81	47	80	NO	[Not Available]	[Not Available]	NO	[Not Available]	NO	[Not Available]	No	[Not Available]	4	1974	2004	Alive	30	[Not Evaluated]	1	Pre-Adjuvant Therapy
fb2fc561-3870-439c-90e2-13ef9e47c013	TCGA-92-8065	2012-05-18	Lung Squamous Cell Carcinoma	YES	NO	FEMALE	WHITE	NOT HISPANIC OR LATINO	[Not Available]	No	L-Lower	Central Lung	Lung Squamous Cell Carcinoma- Not Otherwise Specified (NOS)	2012	[Not Available]	[Not Available]	RX	7th	T3	N0	MX	Stage IIB	[Not Applicable]	[Not Applicable]	[Not Applicable]	[Not Applicable]	YES	92	86	72	67	55	NO	[Not Available]	[Not Available]	NO	[Not Available]	NO	[Not Available]	No	[Not Available]	3	1968	1995	Alive	14	[Not Evaluated]	0	Preoperative
3351b902-9b7e-4b90-bf6b-bcf74be00bc1	TCGA-94-7033	2011-8-00	Lung Squamous Cell Carcinoma	YES	NO	MALE	WHITE	NOT HISPANIC OR LATINO	[Not Available]	Yes	[Discrepancy]	[Not Available]	Lung Squamous Cell Carcinoma- Not Otherwise Specified (NOS)	2011	[Not Available]	[Not Available]	R0	7th	T2	N0	MX	Stage IB	[Not Applicable]	[Not Applicable]	[Not Applicable]	[Not Applicable]	[Not Available]	[Not Available]	[Not Available]	[Not Available]	[Not Available]	[Not Available]	[Not Available]	[Not Available]	[Not Available]	[Not Available]	[Not Available]	[Not Available]	[Not Available]	No	[Not Available]	4	[Not Available]	2011	Alive	30	[Not Available]	2	Pre-Adjuvant Therapy
ea741488-5475-4a3d-b9fe-81722f129974	TCGA-94-7557	2012-01-31	Lung Squamous Cell Carcinoma	YES	NO	MALE	BLACK OR AFRICAN AMERICAN	NOT HISPANIC OR LATINO	[Not Available]	Yes	L-Upper	[Not Available]	Lung Squamous Cell Carcinoma- Not Otherwise Specified (NOS)	2011	[Not Available]	[Not Available]	[Not Available]	7th	T2	N0	M0	Stage IB	[Not Applicable]	[Not Applicable]	[Not Applicable]	[Not Applicable]	YES	71	75	69	68	78	[Not Available]	[Not Available]	[Not Available]	[Not Available]	[Not Available]	[Not Available]	[Not Available]	No	[Not Available]	2	[Not Available]	[Not Available]	Dead	[Not Available]	[Not Available]	[Not Available]	[Not Available]
aecf85cc-058c-46f3-9cdc-3573ac3b8438	TCGA-94-7943	2012-03-20	Lung Squamous Cell Carcinoma	YES	NO	MALE	WHITE	NOT HISPANIC OR LATINO	[Not Available]	Yes	L-Lower	[Not Available]	Lung Squamous Cell Carcinoma- Not Otherwise Specified (NOS)	2011	[Not Available]	[Not Available]	R0	7th	T1b	NX	MX	Stage IA	[Not Applicable]	[Not Applicable]	[Not Applicable]	[Not Applicable]	YES	86	93	0	0	71	[Not Available]	[Not Available]	[Not Available]	[Not Available]	[Not Available]	[Not Available]	[Not Available]	No	[Not Available]	3	1961	1991	Alive	30	[Not Available]	1	Preoperative
3429df57-5aae-41aa-8247-6a2ea935a934	TCGA-94-8035	2012-06-20	Lung Squamous Cell Carcinoma	YES	NO	MALE	WHITE	NOT HISPANIC OR LATINO	[Not Available]	No	L-Upper	[Not Available]	Lung Squamous Cell Carcinoma- Not Otherwise Specified (NOS)	2011	[Not Available]	[Not Available]	R0	7th	T3	N0	MX	Stage IIB	[Not Applicable]	[Not Applicable]	[Not Applicable]	[Not Applicable]	YES	67	0	0	0	0	[Not Available]	[Not Available]	[Not Available]	[Not Available]	[Not Available]	[Not Available]	[Not Available]	No	[Not Available]	2	1961	[Not Available]	Alive	50	[Not Evaluated]	[Not Evaluated]	[Not Available]
74c4b266-a08d-4882-b96e-28d2a4db0a9b	TCGA-94-8490	2012-08-31	Lung Squamous Cell Carcinoma	YES	NO	MALE	WHITE	NOT HISPANIC OR LATINO	[Not Available]	No	R-Upper	[Not Available]	Lung Squamous Cell Carcinoma- Not Otherwise Specified (NOS)	2011	[Not Available]	[Not Available]	R0	7th	T3	N0	M0	Stage IIB	[Not Applicable]	[Not Applicable]	[Not Applicable]	[Not Applicable]	NO	[Not Available]	[Not Available]	[Not Available]	[Not Available]	[Not Available]	NO	[Not Available]	[Not Available]	NO	[Not Available]	NO	[Not Available]	No	[Not Available]	5	[Not Available]	[Not Available]	Alive	[Not Available]	[Not Available]	[Not Available]	[Not Available]
aeb67cc2-1573-4782-a6f8-baef7c2c5c47	TCGA-94-8491	2012-10-04	Lung Squamous Cell Carcinoma	YES	NO	MALE	WHITE	[Unknown]	[Not Available]	No	R-Lower	[Not Available]	Lung Squamous Cell Carcinoma- Not Otherwise Specified (NOS)	2012	[Not Available]	[Not Available]	[Not Available]	7th	T2a	N1	M0	Stage IIA	[Not Applicable]	[Not Applicable]	[Not Applicable]	[Not Applicable]	NO	[Not Available]	[Not Available]	[Not Available]	[Not Available]	[Not Available]	NO	[Not Available]	[Not Available]	NO	[Not Available]	NO	[Not Available]	No	[Not Available]	3	1956	1984	Alive	56	[Not Available]	[Not Available]	[Not Available]
2E1D5E59-357D-42F3-8898-CC03839CF958	TCGA-94-A4VJ	2013-02-18	Lung Squamous Cell Carcinoma	YES	NO	FEMALE	WHITE	NOT HISPANIC OR LATINO	[Not Available]	No	Bronchial	Central Lung	Lung Squamous Cell Carcinoma- Not Otherwise Specified (NOS)	2012	[Not Available]	[Not Available]	[Not Available]	7th	T1b	N0	M0	Stage IA	[Not Applicable]	[Not Applicable]	[Not Applicable]	[Not Applicable]	NO	[Not Available]	[Not Available]	[Not Available]	[Not Available]	[Not Available]	NO	[Not Available]	[Not Available]	NO	[Not Available]	NO	[Not Available]	No	[Not Available]	4	1962	2012	Alive	37.5	[Not Available]	[Not Available]	[Not Available]
442C412D-6CC5-4FFD-810C-C94C8E643BD6	TCGA-94-A5I4	2013-04-22	Lung Squamous Cell Carcinoma	YES	NO	MALE	WHITE	NOT HISPANIC OR LATINO	[Not Available]	Yes, History of Prior Malignancy	Bronchial	Central Lung	Lung Squamous Cell Carcinoma- Not Otherwise Specified (NOS)	2012	[Not Available]	[Not Available]	RX	7th	T2a	N1	MX	Stage IIA	[Not Applicable]	[Not Applicable]	[Not Applicable]	[Not Applicable]	NO	[Not Available]	[Not Available]	[Not Available]	[Not Available]	[Not Available]	NO	[Not Available]	[Not Available]	NO	[Not Available]	NO	[Not Available]	No	[Not Available]	4	[Not Available]	2006	Alive	80	[Not Evaluated]	2	Pre-Adjuvant Therapy
644F0C64-C710-4FAA-ADA5-CBB9A52ACF93	TCGA-94-A5I6	2013-05-08	Lung Squamous Cell Carcinoma	YES	NO	MALE	WHITE	NOT HISPANIC OR LATINO	[Not Available]	No	L-Lower	Peripheral Lung	Lung Squamous Cell Carcinoma- Not Otherwise Specified (NOS)	2012	[Not Available]	[Not Available]	RX	7th	T3	N0	M0	Stage IIB	[Not Applicable]	[Not Applicable]	[Not Applicable]	[Not Applicable]	NO	[Not Available]	[Not Available]	[Not Available]	[Not Available]	[Not Available]	NO	[Not Available]	[Not Available]	NO	[Not Available]	NO	[Not Available]	No	[Not Available]	4	1972	2012	Alive	80	[Not Evaluated]	2	Post-Adjuvant Therapy
185923c0-e642-41c4-a22e-0dae102b0a40	TCGA-96-7544	2011-11-17	Lung Squamous Cell Carcinoma	NO	YES	MALE	WHITE	NOT HISPANIC OR LATINO	[Not Available]	No	L-Lower	[Not Available]	Lung Squamous Cell Carcinoma- Not Otherwise Specified (NOS)	2008	[Not Available]	[Not Available]	[Not Available]	6th	T2	N1	MX	Stage IIB	[Not Applicable]	[Not Applicable]	[Not Applicable]	[Not Applicable]	YES	79	83	59	59	94	[Not Available]	[Not Available]	[Not Available]	[Not Available]	[Not Available]	[Not Available]	[Not Available]	No	[Not Available]	2	1943	[Not Available]	Alive	65	[Not Available]	[Not Available]	[Not Available]
4ca13c92-84b4-4edf-842a-b20b7e713415	TCGA-96-7545	2011-11-17	Lung Squamous Cell Carcinoma	NO	YES	MALE	WHITE	NOT HISPANIC OR LATINO	[Not Available]	Yes	R-Lower	[Not Available]	Lung Squamous Cell Carcinoma- Not Otherwise Specified (NOS)	2008	[Not Available]	[Not Available]	[Not Available]	6th	T1	N0	MX	Stage IA	[Not Applicable]	[Not Applicable]	[Not Applicable]	[Not Applicable]	YES	52	55	61	65	57	[Not Available]	[Not Available]	[Not Available]	[Not Available]	[Not Available]	[Not Available]	[Not Available]	No	[Not Available]	4	[Not Available]	2005	Alive	116	[Not Available]	[Not Available]	[Not Available]
d598c429-6027-44a1-88a9-e0c396490942	TCGA-96-8169	2012-06-13	Lung Squamous Cell Carcinoma	YES	NO	FEMALE	WHITE	NOT HISPANIC OR LATINO	[Not Available]	No	R-Lower	[Not Available]	Lung Squamous Cell Carcinoma- Not Otherwise Specified (NOS)	2011	[Not Available]	[Not Available]	[Not Available]	7th	T1a	N0	M0	Stage IA	[Not Applicable]	[Not Applicable]	[Not Applicable]	[Not Applicable]	YES	93.7	98.55	104.09	110.59	48.83	NO	[Not Available]	[Not Available]	NO	[Not Available]	NO	[Not Available]	No	[Not Available]	4	1970	2005	Alive	35	[Not Available]	0	Preoperative
3602e21d-0c65-43a9-ab8d-95bbf20ceba7	TCGA-96-8170	2012-06-13	Lung Squamous Cell Carcinoma	YES	NO	FEMALE	WHITE	NOT HISPANIC OR LATINO	[Not Available]	No	R-Lower	[Not Available]	Lung Squamous Cell Carcinoma- Not Otherwise Specified (NOS)	2011	[Not Available]	[Not Available]	[Not Available]	7th	T1a	N1	M0	Stage IIA	[Not Applicable]	[Not Applicable]	[Not Applicable]	[Not Applicable]	YES	61	59	67	68	[Not Available]	NO	[Not Available]	[Not Available]	NO	[Not Available]	NO	[Not Available]	No	[Not Available]	4	1961	2011	Alive	50	[Not Available]	2	Preoperative
613ADBB3-C2D1-4992-9953-C4FADD249001	TCGA-96-A4JK	2013-03-07	Lung Squamous Cell Carcinoma	YES	NO	MALE	WHITE	NOT HISPANIC OR LATINO	[Not Available]	Yes, History of Prior Malignancy	R-Upper	[Unknown]	Lung Squamous Cell Carcinoma- Not Otherwise Specified (NOS)	2012	[Not Available]	[Not Available]	R0	7th	T2a	N1	M0	Stage IIA	[Not Applicable]	[Not Applicable]	[Not Applicable]	[Not Applicable]	YES	48	55	55	52	75	NO	[Not Available]	[Not Available]	NO	[Not Available]	NO	[Not Available]	Yes, Pharmaceutical Treatment Prior to Resection	[Not Available]	2	1957	[Not Available]	Alive	110	[Not Evaluated]	0	Preoperative
0CCA2B84-62BB-41C6-A65D-C27E4E98AF78	TCGA-96-A4JL	2013-03-07	Lung Squamous Cell Carcinoma	YES	NO	FEMALE	ASIAN	NOT HISPANIC OR LATINO	[Not Available]	No	L-Lower	[Unknown]	Lung Squamous Cell Carcinoma- Not Otherwise Specified (NOS)	2012	[Not Available]	[Not Available]	R0	7th	T2a	N1	M0	Stage IIA	[Not Applicable]	[Not Applicable]	[Not Applicable]	[Not Applicable]	YES	98	93	76	76	70	NO	[Not Available]	[Not Available]	NO	[Not Available]	NO	[Not Available]	No	[Not Available]	1	[Not Available]	[Not Available]	Alive	[Not Available]	[Not Available]	0	Preoperative
ae343aae-7273-4c46-826d-01377bed5a75	TCGA-98-7454	2012-01-06	Lung Squamous Cell Carcinoma	NO	YES	MALE	WHITE	NOT HISPANIC OR LATINO	[Not Available]	No	R-Upper	[Not Available]	Lung Squamous Cell Carcinoma- Not Otherwise Specified (NOS)	2011	[Not Available]	[Not Available]	R0	7th	T2a	N0	M0	Stage IB	[Not Applicable]	[Not Applicable]	[Not Applicable]	[Not Applicable]	[Not Available]	[Not Available]	[Not Available]	[Not Available]	[Not Available]	[Not Available]	YES	[Not Available]	[Not Available]	YES	[Not Available]	YES	[Not Available]	No	[Not Available]	3	1943	1983	Alive	60	100	0	Preoperative
ffb53b81-c1ed-473c-bdcd-b325b02e22ae	TCGA-98-8020	2012-06-18	Lung Squamous Cell Carcinoma	NO	YES	FEMALE	BLACK OR AFRICAN AMERICAN	NOT HISPANIC OR LATINO	[Not Available]	Yes, History of Prior Malignancy	R-Upper	Central Lung	Lung Squamous Cell Carcinoma- Not Otherwise Specified (NOS)	2011	[Not Available]	[Not Available]	R0	7th	T2	N2	M0	Stage IIIA	[Not Applicable]	[Not Applicable]	[Not Applicable]	[Not Applicable]	YES	79	[Not Available]	77	[Not Available]	47	YES	NO	[Not Available]	YES	[Not Available]	NO	[Not Available]	No	[Not Available]	1	[Not Available]	[Not Available]	Dead	[Not Available]	[Unknown]	1	Preoperative
10c3acc1-5c0b-4312-9521-2e4104396c24	TCGA-98-8021	2012-06-15	Lung Squamous Cell Carcinoma	NO	YES	FEMALE	WHITE	NOT HISPANIC OR LATINO	[Not Available]	No	R-Upper	[Unknown]	Lung Squamous Cell Carcinoma- Not Otherwise Specified (NOS)	2011	[Not Available]	[Not Available]	R0	7th	T1a	N0	M0	Stage IA	[Not Applicable]	[Not Applicable]	[Not Applicable]	[Not Applicable]	YES	101	[Not Available]	68	[Not Available]	83	NO	[Not Available]	[Not Available]	YES	[Not Available]	NO	[Not Available]	No	[Not Available]	4	1950	2010	Alive	60	[Not Evaluated]	2	Preoperative
adc853b1-b8bf-488c-a1e2-e95603459b55	TCGA-98-8022	2012-06-15	Lung Squamous Cell Carcinoma	NO	YES	MALE	WHITE	NOT HISPANIC OR LATINO	[Not Available]	No	R-Upper	[Unknown]	Lung Squamous Cell Carcinoma- Not Otherwise Specified (NOS)	2011	[Not Available]	[Not Available]	R0	7th	T1a	N0	M0	Stage IA	[Not Applicable]	[Not Applicable]	[Not Applicable]	[Not Applicable]	YES	21	[Not Available]	44	[Not Available]	42	YES	NO	[Not Available]	YES	[Not Available]	NO	[Not Available]	No	[Not Available]	4	1961	2008	Alive	117	[Unknown]	0	Preoperative
553f810b-e917-4935-a875-dc9b902d0789	TCGA-98-8023	2012-06-18	Lung Squamous Cell Carcinoma	YES	NO	MALE	WHITE	NOT HISPANIC OR LATINO	[Not Available]	No	Other (please specify)	[Unknown]	Lung Squamous Cell Carcinoma- Not Otherwise Specified (NOS)	2011	[Not Available]	[Not Available]	R0	7th	T3	N1	M0	Stage IIIA	[Not Applicable]	[Not Applicable]	[Not Applicable]	[Not Applicable]	YES	54	[Not Available]	46	[Not Available]	69	YES	NO	[Not Available]	YES	[Not Available]	NO	[Not Available]	No	[Not Available]	2	1961	[Not Available]	Alive	75	[Not Evaluated]	0	Preoperative
D3E604D1-F8E3-47F7-86FB-104035590AF8	TCGA-98-A538	2013-03-28	Lung Squamous Cell Carcinoma	YES	NO	MALE	WHITE	NOT HISPANIC OR LATINO	[Not Available]	No	L-Upper	[Unknown]	Lung Squamous Cell Carcinoma- Not Otherwise Specified (NOS)	2012	[Not Available]	[Not Available]	R0	7th	T3	N0	M0	Stage IIB	[Not Applicable]	[Not Applicable]	[Not Applicable]	[Not Applicable]	YES	76	[Not Available]	65	[Not Available]	77	YES	NO	[Not Available]	YES	[Not Available]	NO	[Not Available]	No	[Not Available]	4	1973	2008	Alive	35	[Unknown]	2	Preoperative
BF2F1B1B-9DE9-41BA-8E0D-00E00E39E51D	TCGA-98-A539	2013-04-23	Lung Squamous Cell Carcinoma	YES	NO	MALE	WHITE	NOT HISPANIC OR LATINO	[Not Available]	Yes, History of Prior Malignancy	L-Upper	[Unknown]	Lung Squamous Cell Carcinoma- Not Otherwise Specified (NOS)	2011	[Not Available]	[Not Available]	R0	7th	T3	N0	M0	Stage IIB	[Not Applicable]	[Not Applicable]	[Not Applicable]	[Not Applicable]	YES	73	[Not Available]	60	[Not Available]	55	YES	NO	[Not Available]	YES	[Not Available]	YES	[Not Available]	No	FISH	2	1962	[Not Available]	Alive	75	[Not Evaluated]	1	Preoperative
D92CDA30-29E0-452A-9DE1-1C00758BBB8E	TCGA-98-A53A	2013-04-01	Lung Squamous Cell Carcinoma	YES	NO	MALE	BLACK OR AFRICAN AMERICAN	NOT HISPANIC OR LATINO	[Not Available]	No	R-Middle	[Unknown]	Lung Squamous Cell Carcinoma- Not Otherwise Specified (NOS)	2012	[Not Available]	[Not Available]	R0	7th	T2a	N0	M0	Stage IB	[Not Applicable]	[Not Applicable]	[Not Applicable]	[Not Applicable]	YES	31	[Not Available]	36	[Not Available]	43	YES	NO	[Not Available]	YES	[Not Available]	YES	[Not Available]	No	FISH	2	1972	[Not Available]	Alive	80	[Unknown]	[Not Evaluated]	Preoperative
E88EB552-ADDC-4030-9C54-4BF7D381A703	TCGA-98-A53B	2013-03-28	Lung Squamous Cell Carcinoma	YES	NO	MALE	WHITE	NOT HISPANIC OR LATINO	[Not Available]	No	L-Upper	[Unknown]	Lung Squamous Cell Carcinoma- Not Otherwise Specified (NOS)	2012	[Not Available]	[Not Available]	R0	7th	T2a	N0	M0	Stage IB	[Not Applicable]	[Not Applicable]	[Not Applicable]	[Not Applicable]	YES	96	[Not Available]	79	[Not Available]	90	NO	[Not Available]	[Not Available]	NO	[Not Available]	NO	[Not Available]	No	[Not Available]	2	1972	[Not Available]	Dead	40	[Not Evaluated]	0	Preoperative
5D7A6807-E024-479D-A4DF-1D44AF41FA66	TCGA-98-A53C	2013-04-03	Lung Squamous Cell Carcinoma	YES	NO	FEMALE	WHITE	NOT HISPANIC OR LATINO	[Not Available]	No	R-Lower	[Unknown]	Lung Squamous Cell Carcinoma- Not Otherwise Specified (NOS)	2012	[Not Available]	[Not Available]	R0	7th	T1a	N0	M0	Stage IA	[Not Applicable]	[Not Applicable]	[Not Applicable]	[Not Applicable]	YES	55	[Not Available]	57	[Not Available]	86	NO	[Not Available]	[Not Available]	NO	[Not Available]	NO	[Not Available]	No	[Not Available]	4	1955	2000	Alive	112.5	[Not Evaluated]	2	Preoperative
20765A71-FA13-4D5A-9E66-9FFE961F72AD	TCGA-98-A53D	2013-08-09	Lung Squamous Cell Carcinoma	YES	NO	MALE	WHITE	NOT HISPANIC OR LATINO	[Not Available]	Yes, History of Prior Malignancy	R-Upper	[Not Available]	Lung Squamous Cell Carcinoma- Not Otherwise Specified (NOS)	2012	[Not Available]	[Not Available]	R0	7th	T3	N0	M0	Stage IIB	[Not Applicable]	[Not Applicable]	[Not Applicable]	[Not Applicable]	YES	31	[Not Available]	44	[Not Available]	73	NO	[Not Available]	[Not Available]	NO	[Not Available]	NO	[Not Available]	No	[Not Available]	4	1960	1990	Alive	90	[Not Evaluated]	2	Preoperative
E6CF4B99-D0F9-432A-8977-3704FD38103C	TCGA-98-A53H	2013-04-01	Lung Squamous Cell Carcinoma	YES	NO	FEMALE	WHITE	NOT HISPANIC OR LATINO	[Not Available]	No	R-Upper	[Unknown]	Lung Squamous Cell Carcinoma- Not Otherwise Specified (NOS)	2012	[Not Available]	[Not Available]	R0	7th	T1a	N0	M0	Stage IA	[Not Applicable]	[Not Applicable]	[Not Applicable]	[Not Applicable]	YES	75	[Not Available]	54	[Not Available]	87	NO	[Not Available]	[Not Available]	NO	[Not Available]	NO	[Not Available]	No	[Not Available]	2	1973	[Not Available]	Alive	40	[Unknown]	1	Preoperative
96533D5B-6E44-4D8F-8FD7-270DD4F0362E	TCGA-98-A53I	2013-04-17	Lung Squamous Cell Carcinoma	YES	NO	MALE	WHITE	NOT HISPANIC OR LATINO	[Not Available]	No	R-Upper	[Unknown]	Lung Squamous Cell Carcinoma- Not Otherwise Specified (NOS)	2012	[Not Available]	[Not Available]	R0	7th	T2a	N1	M0	Stage IIA	[Not Applicable]	[Not Applicable]	[Not Applicable]	[Not Applicable]	YES	56	[Not Available]	80	[Not Available]	81	YES	NO	[Not Available]	YES	[Not Available]	YES	[Not Available]	No	FISH	4	1969	2004	Alive	70	[Not Evaluated]	1	Preoperative
400C8D1E-C12B-4D3B-A8EA-85E6BE1CEC4F	TCGA-98-A53J	2013-04-03	Lung Squamous Cell Carcinoma	YES	NO	MALE	WHITE	NOT HISPANIC OR LATINO	[Not Available]	No	R-Upper	[Unknown]	Lung Squamous Cell Carcinoma- Not Otherwise Specified (NOS)	2012	[Not Available]	[Not Available]	R0	7th	T2a	N0	M0	Stage IB	[Not Applicable]	[Not Applicable]	[Not Applicable]	[Not Applicable]	YES	59	57	50	46	81	YES	NO	[Not Available]	YES	[Not Available]	YES	[Not Available]	No	FISH	3	1957	1982	Alive	100	[Not Evaluated]	0	Preoperative
99DAA971-31D0-4C37-9C12-B0DC42DDD19B	TCGA-J1-A4AH	2012-12-27	Lung Squamous Cell Carcinoma	YES	NO	MALE	WHITE	NOT HISPANIC OR LATINO	[Not Available]	Yes, History of Synchronous/Bilateral Malignancy	L-Lower	[Not Available]	Lung Squamous Cell Carcinoma- Not Otherwise Specified (NOS)	2012	[Not Available]	[Not Available]	R0	7th	T2b	N0	MX	Stage IIA	[Not Applicable]	[Not Applicable]	[Not Applicable]	[Not Applicable]	YES	75	[Not Available]	[Not Available]	[Not Available]	77	NO	[Not Available]	[Not Available]	NO	[Not Available]	NO	[Not Available]	No	[Not Available]	4	[Not Available]	2009	Alive	100	[Not Available]	[Not Available]	[Not Available]
D856855F-3069-4169-A192-9113D8542CFB	TCGA-L3-A4E7	2012-12-05	Lung Squamous Cell Carcinoma	NO	YES	MALE	WHITE	NOT HISPANIC OR LATINO	[Not Available]	No	R-Lower	Central Lung	Lung Squamous Cell Carcinoma- Not Otherwise Specified (NOS)	2012	[Not Available]	[Not Available]	R0	7th	T2a	N0	M0	Stage IB	[Not Applicable]	[Not Applicable]	[Not Applicable]	[Not Applicable]	YES	130	140	116	114	87	NO	[Not Available]	[Not Available]	NO	[Not Available]	NO	[Not Available]	No	[Not Available]	2	1962	[Not Available]	Alive	25	[Not Evaluated]	1	Pre-Adjuvant Therapy
FF7099E1-8FF9-48E4-842D-46E98076E7E6	TCGA-L3-A524	2013-01-22	Lung Squamous Cell Carcinoma	NO	YES	FEMALE	WHITE	NOT HISPANIC OR LATINO	[Not Available]	No	R-Upper	Central Lung	Lung Squamous Cell Carcinoma- Not Otherwise Specified (NOS)	2011	[Not Available]	[Not Available]	R0	7th	T3	N0	M0	Stage IIB	[Not Applicable]	[Not Applicable]	[Not Applicable]	[Not Applicable]	YES	111	117	90	92	69	NO	[Not Available]	[Not Available]	NO	[Not Available]	NO	[Not Available]	No	[Not Available]	2	1979	[Not Available]	Alive	25.6	[Not Evaluated]	1	Preoperative
12B44011-90C0-4A70-8EA4-A216EC0C0860	TCGA-LA-A446	2012-12-26	Lung Squamous Cell Carcinoma	YES	NO	MALE	WHITE	NOT HISPANIC OR LATINO	[Not Available]	No	R-Lower	Central Lung	Lung Squamous Cell Carcinoma- Not Otherwise Specified (NOS)	2012	[Not Available]	[Not Available]	R0	7th	T1b	N0	MX	Stage IA	[Not Applicable]	[Not Applicable]	[Not Applicable]	[Not Applicable]	YES	87	92	61	62	[Not Available]	NO	[Not Available]	[Not Available]	NO	[Not Available]	NO	[Not Available]	No	[Not Available]	2	1961	[Not Available]	Alive	26	[Not Evaluated]	0	Preoperative
0425CB44-66AF-4E25-AFCB-CACCCC2F1179	TCGA-LA-A7SW	2014-01-08	Lung Squamous Cell Carcinoma	YES	NO	MALE	BLACK OR AFRICAN AMERICAN	NOT HISPANIC OR LATINO	[Not Available]	No	L-Upper	[Unknown]	Lung Squamous Cell Carcinoma- Not Otherwise Specified (NOS)	2013	[Not Available]	[Not Available]	R0	7th	T3	N1	MX	Stage IIIA	[Not Applicable]	[Not Applicable]	[Not Applicable]	[Not Applicable]	YES	69	72	78	77	41	NO	[Not Available]	[Not Available]	NO	[Not Available]	NO	[Not Available]	No	[Not Available]	4	1962	2012	Alive	37	[Not Available]	1	Preoperative
9F247EEF-9C0A-4E7A-A2E8-2A84225BA307	TCGA-MF-A522	2012-09-28	Lung Squamous Cell Carcinoma	YES	NO	MALE	WHITE	[Unknown]	[Not Available]	No	R-Upper	[Unknown]	Lung Squamous Cell Carcinoma- Not Otherwise Specified (NOS)	2012	[Not Available]	[Not Available]	[Not Available]	7th	T2a	N0	MX	Stage IB	[Not Applicable]	[Not Applicable]	[Not Applicable]	[Not Applicable]	YES	[Not Available]	[Not Available]	[Not Available]	[Not Available]	[Not Available]	[Not Available]	[Not Available]	[Not Available]	[Not Available]	[Not Available]	[Not Available]	[Not Available]	No	[Not Available]	4	1967	2010	Alive	45	[Not Available]	[Not Available]	[Not Available]
F878C2C3-BF50-423B-9703-973EFBFC071C	TCGA-NC-A5HD	2013-04-16	Lung Squamous Cell Carcinoma	NO	YES	MALE	WHITE	[Not Evaluated]	[Not Available]	Yes, History of Prior Malignancy	L-Upper	Peripheral Lung	Lung Squamous Cell Carcinoma- Not Otherwise Specified (NOS)	2008	[Not Available]	[Not Available]	R0	6th	T3	N0	M0	Stage IIB	[Not Applicable]	[Not Applicable]	[Not Applicable]	[Not Applicable]	YES	66	[Not Available]	65	[Not Available]	63	NO	[Not Available]	[Not Available]	NO	[Not Available]	NO	[Not Available]	No	[Not Available]	4	[Not Available]	2003	Dead	50	[Not Evaluated]	[Not Evaluated]	[Not Available]
D5C24C76-2E98-41DF-B17D-B53C0B5E7787	TCGA-NC-A5HE	2013-04-16	Lung Squamous Cell Carcinoma	NO	YES	MALE	WHITE	[Not Evaluated]	[Not Available]	Yes, History of Prior Malignancy	L-Upper	Central Lung	Lung Squamous Cell Carcinoma- Not Otherwise Specified (NOS)	2008	[Not Available]	[Not Available]	R0	6th	T2	N1	M0	Stage IIB	[Not Applicable]	[Not Applicable]	[Not Applicable]	[Not Applicable]	YES	67	71	66	71	79	NO	[Not Available]	[Not Available]	NO	[Not Available]	NO	[Not Available]	No	[Not Available]	4	1973	1993	Alive	30	[Not Evaluated]	0	Pre-Adjuvant Therapy
5B6C3188-5D33-4473-BDD4-0CB9671E9047	TCGA-NC-A5HF	2013-04-16	Lung Squamous Cell Carcinoma	NO	YES	MALE	WHITE	[Not Evaluated]	[Not Available]	No	L-Lower	Peripheral Lung	Lung Squamous Cell Carcinoma- Not Otherwise Specified (NOS)	2008	[Not Available]	[Not Available]	R0	6th	T4	N0	MX	Stage IIIB	[Not Applicable]	[Not Applicable]	[Not Applicable]	[Not Applicable]	YES	65	82	50	51	103	NO	[Not Available]	[Not Available]	NO	[Not Available]	NO	[Not Available]	No	[Not Available]	2	[Not Available]	[Not Available]	Dead	[Not Available]	[Not Evaluated]	[Not Evaluated]	[Not Available]
C179D6B1-6182-48B8-A376-3133E0DEC278	TCGA-NC-A5HG	2013-04-17	Lung Squamous Cell Carcinoma	NO	YES	MALE	WHITE	[Not Evaluated]	[Not Available]	No	R-Lower	Central Lung	Lung Basaloid Squamous Cell Carcinoma	2009	[Not Available]	[Not Available]	R0	6th	T2	N2	M0	Stage IIIA	[Not Applicable]	[Not Applicable]	[Not Applicable]	[Not Applicable]	YES	85	90	63	68	77	NO	[Not Available]	[Not Available]	NO	[Not Available]	NO	[Not Available]	No	[Not Available]	4	1968	2008	Alive	80	[Not Evaluated]	1	Pre-Adjuvant Therapy
B5865F1E-604D-487D-8A19-DC0C887203ED	TCGA-NC-A5HH	2013-04-17	Lung Squamous Cell Carcinoma	NO	YES	MALE	WHITE	[Not Evaluated]	[Not Available]	No	L-Lower	Peripheral Lung	Lung Basaloid Squamous Cell Carcinoma	2009	[Not Available]	[Not Available]	R0	6th	T1	N0	M0	Stage IA	[Not Applicable]	[Not Applicable]	[Not Applicable]	[Not Applicable]	YES	94	[Not Available]	72	[Not Available]	64	NO	[Not Available]	[Not Available]	NO	[Not Available]	NO	[Not Available]	No	[Not Available]	2	[Not Available]	[Not Available]	Alive	60	[Not Evaluated]	[Not Evaluated]	[Not Available]
CE7DCB92-13AA-4496-82D2-873B53647BFD	TCGA-NC-A5HI	2013-04-17	Lung Squamous Cell Carcinoma	NO	YES	FEMALE	WHITE	[Not Evaluated]	[Not Available]	No	R-Lower	Peripheral Lung	Lung Squamous Cell Carcinoma- Not Otherwise Specified (NOS)	2009	[Not Available]	[Not Available]	R0	6th	T2	N0	M0	Stage IB	[Not Applicable]	[Not Applicable]	[Not Applicable]	[Not Applicable]	YES	91	91	69	66	91	NO	[Not Available]	[Not Available]	NO	[Not Available]	NO	[Not Available]	No	[Not Available]	2	1959	[Not Available]	Alive	60	[Not Evaluated]	[Unknown]	[Unknown]
00FD9306-4A68-49AB-A768-E5FED126A765	TCGA-NC-A5HJ	2013-04-17	Lung Squamous Cell Carcinoma	NO	YES	MALE	WHITE	[Not Evaluated]	[Not Available]	No	R-Middle	Peripheral Lung	Lung Squamous Cell Carcinoma- Not Otherwise Specified (NOS)	2009	[Not Available]	[Not Available]	R0	6th	T3	N0	M0	Stage IIB	[Not Applicable]	[Not Applicable]	[Not Applicable]	[Not Applicable]	YES	107	110	68	68	87	NO	[Not Available]	[Not Available]	NO	[Not Available]	NO	[Not Available]	No	[Not Available]	4	[Not Available]	2009	Dead	78	[Not Evaluated]	1	Pre-Adjuvant Therapy
87410C09-5B61-4F61-85A5-93C288AECA03	TCGA-NC-A5HK	2013-04-17	Lung Squamous Cell Carcinoma	NO	YES	FEMALE	WHITE	[Not Evaluated]	[Not Available]	No	Other (please specify)	Peripheral Lung	Lung Squamous Cell Carcinoma- Not Otherwise Specified (NOS)	2010	[Not Available]	[Not Available]	R0	7th	T3	N0	M0	Stage IIB	[Not Applicable]	[Not Applicable]	[Not Applicable]	[Not Applicable]	YES	97	98	47	49	58	NO	[Not Available]	[Not Available]	NO	[Not Available]	NO	[Not Available]	No	[Not Available]	4	[Not Available]	2009	Alive	40	[Not Evaluated]	1	Pre-Adjuvant Therapy
77BD82A6-A859-4B8E-ACCC-C343CE9F4D38	TCGA-NC-A5HL	2013-04-17	Lung Squamous Cell Carcinoma	NO	YES	MALE	WHITE	[Not Evaluated]	[Not Available]	No	R-Upper	Central Lung	Lung Squamous Cell Carcinoma- Not Otherwise Specified (NOS)	2010	[Not Available]	[Not Available]	R0	7th	T2b	N0	M0	Stage IIA	[Not Applicable]	[Not Applicable]	[Not Applicable]	[Not Applicable]	YES	63	[Not Available]	74	[Not Available]	70	NO	[Not Available]	[Not Available]	NO	[Not Available]	NO	[Not Available]	No	[Not Available]	4	[Not Available]	1995	Dead	40	[Not Evaluated]	[Not Evaluated]	[Not Available]
D76C589C-6FAB-493E-9CB0-0D6D06A1047E	TCGA-NC-A5HM	2013-04-17	Lung Squamous Cell Carcinoma	NO	YES	MALE	WHITE	[Not Evaluated]	[Not Available]	Yes, History of Synchronous/Bilateral Malignancy	R-Lower	Peripheral Lung	Lung Squamous Cell Carcinoma- Not Otherwise Specified (NOS)	2010	[Not Available]	[Not Available]	R0	7th	T2a	N0	M0	Stage IB	[Not Applicable]	[Not Applicable]	[Not Applicable]	[Not Applicable]	YES	70	[Not Available]	[Not Available]	[Not Available]	80	NO	[Not Available]	[Not Available]	NO	[Not Available]	NO	[Not Available]	No	[Not Available]	3	[Not Available]	1992	Alive	50	[Not Evaluated]	[Not Evaluated]	[Not Available]
E2E9A34A-8838-4E08-BB80-83F357704328	TCGA-NC-A5HN	2013-04-17	Lung Squamous Cell Carcinoma	NO	YES	MALE	WHITE	[Not Evaluated]	[Not Available]	No	L-Lower	Central Lung	Lung Squamous Cell Carcinoma- Not Otherwise Specified (NOS)	2010	[Not Available]	[Not Available]	R0	7th	T2a	N1	M0	Stage IIA	[Not Applicable]	[Not Applicable]	[Not Applicable]	[Not Applicable]	YES	65	64	61	61	64	NO	[Not Available]	[Not Available]	NO	[Not Available]	NO	[Not Available]	No	[Not Available]	4	1953	2001	Alive	100	[Not Evaluated]	[Not Evaluated]	[Not Available]
42F86EC9-85A0-4015-990C-BE445F532197	TCGA-NC-A5HO	2013-04-17	Lung Squamous Cell Carcinoma	NO	YES	FEMALE	WHITE	[Not Evaluated]	[Not Available]	No	L-Upper	Central Lung	Lung Squamous Cell Carcinoma- Not Otherwise Specified (NOS)	2011	[Not Available]	[Not Available]	[Not Evaluated]	7th	T3	N1	M0	Stage IIIA	[Not Applicable]	[Not Applicable]	[Not Applicable]	[Not Applicable]	YES	96	96	67	70	64	NO	[Not Available]	[Not Available]	NO	[Not Available]	NO	[Not Available]	No	[Not Available]	4	[Not Available]	2010	Alive	30	[Not Evaluated]	1	Pre-Adjuvant Therapy
4A95CE25-D06A-499D-B7EE-AFF5EE94D4F1	TCGA-NC-A5HP	2013-04-17	Lung Squamous Cell Carcinoma	NO	YES	MALE	WHITE	[Not Evaluated]	[Not Available]	No	L-Upper	Peripheral Lung	Lung Squamous Cell Carcinoma- Not Otherwise Specified (NOS)	2011	[Not Available]	[Not Available]	R0	7th	T2a	N0	M1b	Stage IV	[Not Applicable]	[Not Applicable]	[Not Applicable]	[Not Applicable]	YES	87	[Not Available]	99	[Not Available]	[Not Available]	NO	[Not Available]	[Not Available]	NO	[Not Available]	NO	[Not Available]	No	[Not Available]	2	[Not Available]	[Not Available]	Alive	50	[Not Evaluated]	[Not Evaluated]	[Not Available]
4B185183-7E94-4AAB-B19D-6A2E48B85A5D	TCGA-NC-A5HQ	2013-04-17	Lung Squamous Cell Carcinoma	NO	YES	MALE	WHITE	[Not Evaluated]	[Not Available]	No	R-Middle	Central Lung	Lung Squamous Cell Carcinoma- Not Otherwise Specified (NOS)	2011	[Not Available]	[Not Available]	R0	7th	T3	N2	M0	Stage IIIA	[Not Applicable]	[Not Applicable]	[Not Applicable]	[Not Applicable]	YES	104	97	79	76	142	NO	[Not Available]	[Not Available]	NO	[Not Available]	NO	[Not Available]	No	[Not Available]	2	[Not Available]	[Not Available]	Dead	[Not Available]	[Not Evaluated]	1	Pre-Adjuvant Therapy
169B32F1-4371-464C-AC94-22B7D7389403	TCGA-NC-A5HR	2013-04-19	Lung Squamous Cell Carcinoma	NO	YES	FEMALE	WHITE	[Not Evaluated]	[Not Available]	Yes, History of Prior Malignancy	R-Lower	Central Lung	Lung Basaloid Squamous Cell Carcinoma	2011	[Not Available]	[Not Available]	R0	7th	T2a	N1	M0	Stage IIA	[Not Applicable]	[Not Applicable]	[Not Applicable]	[Not Applicable]	YES	112	[Not Available]	72	[Not Available]	69	NO	[Not Available]	[Not Available]	NO	[Not Available]	NO	[Not Available]	No	[Not Available]	4	[Not Available]	2008	Alive	35	[Not Evaluated]	1	Pre-Adjuvant Therapy
8BA2CF7B-E474-4ABA-8C6D-9FD36F5C6759	TCGA-NC-A5HT	2013-04-19	Lung Squamous Cell Carcinoma	NO	YES	MALE	WHITE	[Not Evaluated]	[Not Available]	No	Other (please specify)	Central Lung	Lung Squamous Cell Carcinoma- Not Otherwise Specified (NOS)	2012	[Not Available]	[Not Available]	R0	7th	T3	N1	M0	Stage IIIA	[Not Applicable]	[Not Applicable]	[Not Applicable]	[Not Applicable]	YES	56	[Not Available]	75	46	69	NO	[Not Available]	[Not Available]	NO	[Not Available]	NO	[Not Available]	No	[Not Available]	4	[Not Available]	2011	Alive	50	[Not Evaluated]	[Not Evaluated]	[Not Available]
26B3A62A-132E-401F-BB7F-E9CB9EFF71C4	TCGA-NK-A5CR	2013-09-25	Lung Squamous Cell Carcinoma	NO	YES	MALE	[Unknown]	NOT HISPANIC OR LATINO	[Not Available]	No	R-Upper	[Unknown]	Lung Squamous Cell Carcinoma- Not Otherwise Specified (NOS)	2007	[Not Available]	[Not Available]	[Not Evaluated]	6th	T2	N0	MX	Stage IB	[Not Applicable]	[Not Applicable]	[Not Applicable]	[Not Applicable]	YES	0.94	1.33	79.8	64.8	84.7	NO	[Not Available]	[Not Available]	NO	[Not Available]	NO	[Not Available]	No	[Not Available]	3	[Not Available]	[Not Available]	Alive	40	[Unknown]	[Unknown]	[Not Evaluated]
F2E35FFC-C87A-4E42-9C8D-E7E5D8B49D87	TCGA-NK-A5CT	2013-09-25	Lung Squamous Cell Carcinoma	NO	YES	MALE	WHITE	NOT HISPANIC OR LATINO	[Not Available]	Yes, History of Prior Malignancy	L-Lower	[Unknown]	Lung Squamous Cell Carcinoma- Not Otherwise Specified (NOS)	2008	[Not Available]	[Not Available]	[Not Evaluated]	6th	T1	N0	M0	Stage IA	[Not Applicable]	[Not Applicable]	[Not Applicable]	[Not Applicable]	NO	[Not Available]	[Not Available]	[Not Available]	[Not Available]	[Not Available]	NO	[Not Available]	[Not Available]	NO	[Not Available]	NO	[Not Available]	No	[Not Available]	[Discrepancy]	[Not Available]	2003	Alive	80	[Not Evaluated]	[Not Evaluated]	[Not Available]
5B3CB83B-CFDE-42DC-A6EC-0127BD0E6685	TCGA-NK-A5CX	2013-09-25	Lung Squamous Cell Carcinoma	NO	YES	MALE	WHITE	NOT HISPANIC OR LATINO	[Not Available]	No	R-Lower	[Unknown]	Lung Squamous Cell Carcinoma- Not Otherwise Specified (NOS)	2011	[Not Available]	[Not Available]	[Not Evaluated]	7th	T2b	N0	MX	Stage IIA	[Not Applicable]	[Not Applicable]	[Not Applicable]	[Not Applicable]	NO	[Not Available]	[Not Available]	[Not Available]	[Not Available]	[Not Available]	NO	[Not Available]	[Not Available]	NO	[Not Available]	NO	[Not Available]	No	[Not Available]	4	[Not Available]	2005	Alive	40	[Not Evaluated]	[Not Evaluated]	[Not Evaluated]
80AA8E99-41D5-422F-A1BB-69599AA8236F	TCGA-NK-A5D1	2013-09-27	Lung Squamous Cell Carcinoma	[Not Available]	[Not Available]	MALE	WHITE	NOT HISPANIC OR LATINO	[Not Available]	Yes, History of Prior Malignancy	R-Upper	[Unknown]	Lung Basaloid Squamous Cell Carcinoma	2011	[Not Available]	[Not Available]	[Not Evaluated]	7th	T2a	N1	M0	Stage IIA	[Not Applicable]	[Not Applicable]	[Not Applicable]	[Not Applicable]	NO	[Not Available]	[Not Available]	[Not Available]	[Not Available]	[Not Available]	NO	[Not Available]	[Not Available]	NO	[Not Available]	NO	[Not Available]	No	[Not Available]	[Discrepancy]	[Not Available]	2000	Alive	90	[Not Evaluated]	[Not Evaluated]	[Not Evaluated]
0366C911-3267-41A0-AF4B-5E74577AE16A	TCGA-NK-A7XE	2014-05-22	Lung Squamous Cell Carcinoma	[Not Available]	[Not Available]	MALE	BLACK OR AFRICAN AMERICAN	NOT HISPANIC OR LATINO	[Not Available]	Yes, History of Prior Malignancy	L-Upper	[Unknown]	Lung Squamous Cell Carcinoma- Not Otherwise Specified (NOS)	2013	[Not Available]	[Not Available]	[Not Available]	7th	T4	N2	M0	Stage IIIB	[Not Applicable]	[Not Applicable]	[Not Applicable]	[Not Applicable]	NO	[Not Available]	[Not Available]	[Not Available]	[Not Available]	[Not Available]	NO	[Not Available]	[Not Available]	NO	[Not Available]	NO	[Not Available]	No	[Not Available]	5	[Not Available]	[Not Available]	Alive	80	[Not Available]	[Not Available]	[Not Available]
0DF0D6B6-66AA-4E76-8675-AA93787B93E3	TCGA-O2-A52N	2013-04-11	Lung Squamous Cell Carcinoma	NO	YES	MALE	WHITE	NOT HISPANIC OR LATINO	[Not Available]	No	R-Upper	[Unknown]	Lung Squamous Cell Carcinoma- Not Otherwise Specified (NOS)	2005	[Not Available]	[Not Available]	[Not Available]	6th	T2	N0	MX	Stage I	[Not Applicable]	[Not Applicable]	[Not Applicable]	[Not Applicable]	NO	[Not Available]	[Not Available]	[Not Available]	[Not Available]	[Not Available]	NO	[Not Available]	[Not Available]	NO	[Not Available]	NO	[Not Available]	No	[Not Available]	4	1942	1997	Dead	4.125	[Not Evaluated]	0	[Unknown]
94C795D3-E8F9-4D0F-8071-ADC08A37F6FC	TCGA-O2-A52Q	2013-04-11	Lung Squamous Cell Carcinoma	NO	YES	FEMALE	WHITE	NOT HISPANIC OR LATINO	[Not Available]	No	R-Upper	[Unknown]	Lung Squamous Cell Carcinoma- Not Otherwise Specified (NOS)	2005	[Not Available]	[Not Available]	[Not Evaluated]	6th	T3	N1	MX	Stage III	[Not Applicable]	[Not Applicable]	[Not Applicable]	[Not Applicable]	NO	[Not Available]	[Not Available]	[Not Available]	[Not Available]	[Not Available]	NO	[Not Available]	[Not Available]	NO	[Not Available]	NO	[Not Available]	No	[Not Available]	2	1985	[Not Available]	Dead	1	[Not Evaluated]	3	[Unknown]
E80A4625-1B5A-4ABC-8AB9-978D1488B961	TCGA-O2-A52S	2013-04-11	Lung Squamous Cell Carcinoma	NO	YES	FEMALE	WHITE	NOT HISPANIC OR LATINO	[Not Available]	No	L-Lower	[Unknown]	Lung Squamous Cell Carcinoma- Not Otherwise Specified (NOS)	2006	[Not Available]	[Not Available]	[Not Evaluated]	6th	T4	N2	MX	Stage III	[Not Applicable]	[Not Applicable]	[Not Applicable]	[Not Applicable]	NO	[Not Available]	[Not Available]	[Not Available]	[Not Available]	[Not Available]	NO	[Not Available]	[Not Available]	NO	[Not Available]	NO	[Not Available]	No	[Not Available]	4	1976	2006	Dead	3	[Not Evaluated]	1	[Unknown]
6A2CE004-8A2D-419F-9738-E352D298A315	TCGA-O2-A52V	2013-05-19	Lung Squamous Cell Carcinoma	NO	YES	FEMALE	BLACK OR AFRICAN AMERICAN	NOT HISPANIC OR LATINO	[Not Available]	No	L-Upper	[Unknown]	Lung Squamous Cell Carcinoma- Not Otherwise Specified (NOS)	2006	[Not Available]	[Not Available]	[Not Evaluated]	6th	T3	N0	MX	Stage II	[Not Applicable]	[Not Applicable]	[Not Applicable]	[Not Applicable]	NO	[Not Available]	[Not Available]	[Not Available]	[Not Available]	[Not Available]	NO	[Not Available]	[Not Available]	NO	[Not Available]	NO	[Not Available]	No	[Not Available]	4	1976	1996	Dead	1	[Not Evaluated]	1	[Unknown]
1A49A131-D714-40D7-85B6-C4822C0C6264	TCGA-O2-A52W	2013-04-11	Lung Squamous Cell Carcinoma	NO	YES	MALE	BLACK OR AFRICAN AMERICAN	NOT HISPANIC OR LATINO	[Not Available]	Yes, History of Prior Malignancy	R-Lower	[Unknown]	Lung Squamous Cell Carcinoma- Not Otherwise Specified (NOS)	2006	[Not Available]	[Not Available]	[Not Evaluated]	6th	T2	N0	MX	Stage I	[Not Applicable]	[Not Applicable]	[Not Applicable]	[Not Applicable]	NO	[Not Available]	[Not Available]	[Not Available]	[Not Available]	[Not Available]	NO	[Not Available]	[Not Available]	NO	[Not Available]	NO	[Not Available]	No	[Not Available]	4	1956	2006	Dead	2.5	[Not Evaluated]	3	[Unknown]
8BE10CE9-220D-4816-A575-8E8E7F041114	TCGA-O2-A5IB	2013-05-19	Lung Squamous Cell Carcinoma	NO	YES	FEMALE	WHITE	NOT HISPANIC OR LATINO	[Not Available]	No	R-Middle	[Unknown]	Lung Squamous Cell Carcinoma- Not Otherwise Specified (NOS)	2005	[Not Available]	[Not Available]	[Not Evaluated]	6th	T3	N1	MX	Stage III	[Not Applicable]	[Not Applicable]	[Not Applicable]	[Not Applicable]	NO	[Not Available]	[Not Available]	[Not Available]	[Not Available]	[Not Available]	NO	[Not Available]	[Not Available]	NO	[Not Available]	NO	[Not Available]	No	[Not Available]	4	1954	2004	Dead	2.5	[Not Evaluated]	0	[Unknown]
DDAC166A-425A-4FCE-8DF8-F945A2EAA198	TCGA-XC-AA0X	2014-04-22	Lung Squamous Cell Carcinoma	YES	NO	FEMALE	BLACK OR AFRICAN AMERICAN	NOT HISPANIC OR LATINO	[Not Available]	No	R-Lower	Central Lung	Lung Squamous Cell Carcinoma- Not Otherwise Specified (NOS)	2013	[Not Available]	[Not Available]	R0	7th	T1a	N0	M0	Stage IA	[Not Applicable]	[Not Applicable]	[Not Applicable]	[Not Applicable]	YES	91	[Not Available]	72	[Not Available]	73	NO	[Not Available]	[Not Available]	NO	[Not Available]	NO	[Not Available]	No	[Not Available]	2	1953	2013	Dead	30	[Not Available]	[Not Available]	[Not Available]
[truncated: 58 more columns]
