# Supplementary material for: Integrated genomic analyses of lung squamous cell carcinoma for identification of a possible competitive endogenous RNA network by means of TCGA datasets
Source: PeerJ. 2018 Jan 12;6:e4254. doi: 10.7717/peerj.4254 (PMC5768173; doi:10.7717/peerj.4254)
Supplement: Supplemental Information 4 [file peerj-06-4254-s004.xlsx]

## Sheet: miRNA各分组样本数据
miRNA	miRNA_Accession	TCGA-18-3412(T1)	TCGA-18-4086(T1)	TCGA-21-1076(T1)	TCGA-21-5782(T1)	TCGA-21-5784(T1)	TCGA-21-5786(T1)	TCGA-22-0944(T1)	TCGA-22-1011(T1)	TCGA-22-1012(T1)	TCGA-22-4596(T1)	TCGA-22-4605(T1)	TCGA-22-4607(T1)	TCGA-22-4609(T1)	TCGA-22-4613(T1)	TCGA-22-5474(T1)	TCGA-22-5477(T1)	TCGA-22-5478(T1)	TCGA-22-5482(T1)	TCGA-22-5485(T1)	TCGA-22-5489(T1)	TCGA-22-5491(T1)	TCGA-33-4587(T1)	TCGA-33-A4WN(T1)	TCGA-33-AAS8(T1)	TCGA-33-AASB(T1)	TCGA-33-AASD(T1)	TCGA-33-AASJ(T1)	TCGA-33-AASL(T1)	TCGA-34-2600(T1)	TCGA-34-2608(T1)	TCGA-34-5231(T1)	TCGA-34-5241(T1)	TCGA-34-5927(T1)	TCGA-34-5929(T1)	TCGA-37-3789(T1)	TCGA-37-3792(T1)	TCGA-37-4130(T1)	TCGA-37-4135(T1)	TCGA-37-4141(T1)	TCGA-39-5022(T1)	TCGA-39-5031(T1)	TCGA-43-3394(T1)	TCGA-43-3920(T1)	TCGA-43-6143(T1)	TCGA-43-6770(T1)	TCGA-43-6771(T1)	TCGA-43-7656(T1)	TCGA-43-8116(T1)
hsa-let-7a-5p	MIMAT0000062	17849.9	13259.8	12278.4	15317.7	19953.1	15719.4	13292.2	12769.5	8654.81	13675.2	24022.3	12367.2	35778.7	23761.8	20113.9	17493.9	12307.2	22413.4	15689.7	20066.3	12912.6	24288.6	27183.8	18942.8	18279.9	24708.4	24607.5	22637	16212.4	18119.3	68148.9	29054.7	18005.4	39355.3	15040.1	15355.3	7944.62	19087.8	12554.9	37458.9	27632.3	15553.7	13344.8	30891.6	51825.8	32574.5	25194.9	18204.9
hsa-let-7a-3p	MIMAT0004481	28.7438	29.2543	30.2439	41.7734	42.8244	32.2571	30.1758	40.0218	25.4858	31.4107	12.3099	25.3924	12.5556	20.9845	16.3566	24.4222	41.7232	68.6653	39.5954	27.2464	23.6907	39.2479	22.8686	44.049	78.468	115.01	26.532	17.0764	42.358	37.5392	60.6485	22.0856	28.1449	58.584	35.3281	26.0837	4.06541	8.74077	23.9152	17.6279	24.5676	55.4823	47.6088	54.5614	20.6631	83.2227	29.6234	41.6197
hsa-let-7a-2-3p	MIMAT0010195	5.15914	9.20968	13.6394	31.3865	45.049	37.6333	8.9998	15.0082	8.76073	47.1161	14.6001	16.9283	31.2749	17.8368	15.829	15.3094	20.8616	23.115	42.0701	17.1263	6.35603	5.56896	9.14746	9.90577	16.1388	2.20115	5.13523	0.111611	4.45874	10.8985	1.15889	20.7334	4.11348	1.75533	5.12828	6.68813	8.9439	6.68412	12.5011	3.43199	29.9278	15.6974	33.9131	1.8362	5.2859	3.5115	21.9707	10.5854
hsa-let-7b-5p	MIMAT0000063	15704.4	18649.6	12031.7	13826.8	23450.2	8173.6	12468.4	14894.4	6113.4	13032.3	22881.5	16741.4	22654.7	17968	16042.1	12670.4	7609.27	22353.6	11798.2	14789.6	8172.13	16133.3	8593.12	10604.2	9884	22131.8	10156.9	7783.06	25850.9	25545.7	40972.5	31586.5	7635.92	17523.6	11113	12165	4732.95	59019.2	13233.3	16116.6	19220.8	24337.8	10946.8	20381.8	25484.3	20160.3	23093.9	8895.3
hsa-let-7b-3p	MIMAT0004482	22.1106	21.6698	21.3486	30.0317	26.1396	20.9074	25.9406	25.639	19.1143	21.2895	28.9139	18.339	44.0588	23.083	24.2711	15.3094	15.6462	44.8704	37.1207	33.2147	17.9125	13.6572	10.0622	15.5963	24.1155	55.9458	16.5469	14.7326	49.9379	37.5392	97.3467	23.8885	20.5674	41.9084	41.596	18.7268	7.31773	11.3116	13.5882	37.1279	21.4408	30.5829	18.2609	38.6914	41.8067	85.6807	31.5983	14.4346
hsa-let-7c-5p	MIMAT0000064	708.277	662.013	800.573	1628.49	2060.58	795.676	399.168	2460.71	423.701	916.146	1528.14	1685.42	1842.71	1492	833.131	1752.93	1792.36	390.916	611.254	1157.32	1353.26	1362.94	1429.14	1296.18	580.997	1217.6	632.775	532.16	5635.4	1561.81	29070.3	1453.14	2840.47	5774.14	1361.27	337.75	237.42	401.047	1105.54	1892.74	7264.86	1395.18	2698.05	1618.48	5379.12	497.931	941.283	4108.32
hsa-let-7c-3p	MIMAT0026472	7.37021	6.50095	16.0115	55.5473	41.434	32.8545	5.294	87.5477	3.98215	16.4034	10.0197	35.6199	18.0344	59.8058	27.9645	68.1633	39.9847	13.5971	28.4592	22.3161	45.6479	15.1157	6.0983	16.0178	7.04913	29.1652	3.28084	3.01349	66.4353	16.045	134.817	13.9725	22.0829	34.6677	10.2566	2.00644	1.62616	2.57081	16.8494	5.45998	152.319	36.8078	59.348	26.4938	51.8979	1.75575	10.8619	130.152
hsa-let-7d-5p	MIMAT0000065	683.955	249.203	234.242	310.478	359.002	158.896	452.637	233.252	211.054	328.765	186.938	436.609	270.517	484.742	274.369	376.903	288.006	383.438	514.74	241.844	413.72	103.424	174.412	356.818	358.949	168.938	386.711	301.684	566.26	356.319	164.562	211.391	119.724	198.132	855.283	567.822	167.495	642.189	547.332	189.851	514.132	197.571	192.392	184.145	192.695	116.933	209.339	127.505
hsa-let-7d-3p	MIMAT0004484	400.939	433.938	604.877	513.248	263.898	304.651	419.814	268.271	243.708	284.79	466.63	282.491	562.492	950.598	432.658	1249.17	365.658	902.846	1524.42	459.297	520.039	263.73	253.689	583.597	623.106	374.745	405.826	268.535	847.161	279.122	359.642	242.04	346.832	493.027	204.561	191.949	109.766	392.82	362.533	285.167	479.291	481.749	101.739	355.043	572.799	454.389	379.426	252.364
hsa-let-7e-5p	MIMAT0000066	429.683	319.63	357.589	535.828	676.292	821.96	276.876	326.428	238.929	549.687	920.377	540.647	1284.33	425.986	452.708	510.314	1483.49	590.793	984.935	518.201	234.018	716.539	1342.54	1056.97	1023.24	611.002	553.606	1175.6	796.331	581.857	980.034	728.374	559.217	1983.08	720.808	743.72	369.952	563.523	398.949	1386.68	1237.31	615.448	589.567	685.559	1696.29	1235.35	871.668	479.228
hsa-let-7e-3p	MIMAT0004485	4.42212	8.12619	6.52318	15.8062	15.8506	23.2968	5.294	15.0082	12.7429	14.6583	22.6158	14.4596	15.5233	14.6892	5.80395	12.0288	31.2924	29.2337	19.7977	5.70878	4.62257	9.41419	9.75729	12.0134	15.7678	11.9229	3.56613	4.35282	24.969	18.4669	8.88482	11.7189	8.44346	19.9668	13.1056	9.36338	23.5794	15.939	15.7623	10.296	17.8673	23.0049	43.6958	14.0338	11.0523	15.4506	18.0209	6.73613
hsa-let-7f-5p	MIMAT0000067	4579.85	2451.4	2560.05	4177.57	4389.5	5392.32	2770.35	2517	2313.63	2666.07	3629.98	2462.71	7173.37	6812.62	7812.12	6455.83	3572.55	5269.55	4079.56	6457.66	4349.26	2172.82	13254.4	7905.86	5523	3508.63	10105.4	11638.9	2351.54	2864.48	17950.8	5650.76	7661.69	14968.3	2829.67	3724.62	1569.25	2262.83	2933.96	21498.3	7789.26	3114.59	2232.4	7161.45	27028.2	13212.7	4736.53	4192.04
hsa-let-7f-1-3p	MIMAT0004486	5.89617	2.70873	1.77905	3.16123	3.33697	1.79206	4.2352	1.25068	2.38929	1.74504	3.43531	3.17406	2.73941	2.09845	2.11053	2.55157	2.31796	5.43883	3.71207	3.63286	2.88911	0.795565	1.82949	4.63674	5.1941	3.66858	5.27788	1.89738	3.12112	1.81641	2.70407	3.60581	2.38149	3.07182	3.41885	4.01288	0	0	1.63058	4.21199	2.6801	6.22484	3.26088	1.57389	2.40268	3.86265	2.71548	1.20288
hsa-let-7f-2-3p	MIMAT0004487	0.737021	0.541746	1.18603	0.451604	0	0.597354	0.5294	0.62534	0.79643	0.698016	1.1451	0.705346	0.684852	0	0.527632	0.36451	1.15898	1.35971	1.23736	1.03796	0	0.795566	0.60983	2.31837	3.15356	0.917145	0.570581	0.669664	0.891748	0.60547	3.09037	0	1.29899	0.219416	0.569809	1.33763	0	0	2.17411	0.623997	0.446683	1.08258	1.95653	0.131157	0.480536	0.702301	0.246862	0.962305
hsa-miR-15a-5p	MIMAT0000068	141.508	91.555	144.696	89.4176	129.307	100.356	182.643	128.82	144.154	130.878	118.518	99.8064	159.342	161.581	92.3356	112.998	122.852	83.622	111.362	101.201	89.5623	149.699	145.14	189.053	158.42	155.181	232.227	265.857	83.3785	108.076	104.686	85.1873	67.9807	110.805	168.094	145.801	220.345	142.937	153.818	79.8717	99.6104	141.277	73.6959	114.894	95.1462	117.987	125.653	115.477
hsa-miR-15a-3p	MIMAT0004488	0	0.541746	0	0.225802	0	0	0	0.62534	0	0.349008	0	0.352673	0.456568	0	0	1.45804	0.579489	0	0	0.25949	0.577821	0.662971	0	0	0.371008	0.183429	0.142645	0.334832	0.445874	0.302735	1.54519	0	0.216499	0.438831	0.569809	0	0	0.514163	0	0	0.446683	0	0	0.918101	0	0	0	0
hsa-miR-16-5p	MIMAT0000069	2840.48	1040.69	1232.88	900.047	595.648	478.481	1242.5	1074.33	1198.63	930.106	298.299	1087.29	587.146	1839.29	965.567	1266.31	558.627	701.609	581.557	884.341	1104.22	518.178	484.815	963.178	594.539	470.128	1034.89	819.892	1075	809.211	908.955	576.029	464.607	617.435	1818.26	2002.43	2549.01	2928.67	1707.76	533.83	864.332	1802.77	1202.61	973.843	373.857	607.841	480.886	512.908
hsa-miR-16-1-3p	MIMAT0004489	2.94808	4.33397	4.15112	4.06444	5.28353	2.38942	6.8822	10.0054	3.98215	3.49008	3.43531	5.99544	6.62024	9.44303	2.11053	3.28059	6.95387	4.07912	6.18678	4.93031	5.20039	6.36452	3.04915	3.7937	4.63759	7.52059	6.84697	4.91087	3.56699	4.84376	6.95333	3.15509	0.865996	4.1689	12.5358	2.67525	12.1962	8.74077	4.34822	2.33999	4.46683	0.811936	3.91305	3.93472	0.480536	3.86266	6.91213	5.53325
hsa-miR-17-5p	MIMAT0000070	585.194	788.24	351.659	1337.88	305.61	929.484	1267.38	375.83	1130.93	308.523	352.978	557.576	614.084	1734.37	533.436	1159.14	298.437	564.279	1044.33	1011.75	733.833	1574.42	535.431	795.201	1430.97	531.944	1367.11	471.778	576.069	189.815	479.78	361.933	766.407	394.948	1042.75	1142.33	1861.96	1463.82	647.341	149.603	591.409	692.852	230.218	816.716	507.446	378.189	598.393	1696.3
hsa-miR-17-3p	MIMAT0000071	212.999	270.873	133.429	251.995	119.853	194.14	293.817	126.944	279.547	127.737	348.111	220.773	530.304	340.998	132.963	237.66	92.1388	116.255	294.491	249.889	153.7	1018.32	215.88	551.351	977.047	462.975	1050.58	310.389	181.471	109.59	496.391	147.388	751.685	402.189	234.761	343.101	411.419	347.574	182.625	240.083	180.46	105.01	85.435	625.227	288.802	236.675	613.945	755.409
hsa-miR-18a-5p	MIMAT0000072	22.8476	26.0038	13.0464	63.4504	19.1875	23.8942	47.1166	10.0054	58.9358	13.9603	10.3059	13.7542	16.893	34.6244	10.5526	16.0384	4.63591	10.1978	27.2218	19.4617	15.0234	45.4798	18.2949	37.3047	82.9201	25.1298	51.7802	39.9566	17.835	6.05471	11.2026	9.91598	42.4338	11.1902	50.1432	50.8298	59.355	25.7081	22.8282	4.99198	19.6541	12.4497	10.4348	28.1988	12.4939	11.9391	28.1422	66.6396
hsa-miR-18a-3p	MIMAT0002891	2.21106	1.08349	1.77905	12.8707	1.11232	4.18148	5.294	1.25068	2.38929	1.39603	0.286276	0.352673	2.51112	5.24613	2.11053	5.46765	0.579489	2.03956	7.42413	4.93031	1.73346	3.84523	1.82949	4.42598	9.08967	2.38458	1.99703	1.89738	2.22937	0.908206	3.86296	0.450727	9.09296	1.75533	1.13962	4.01288	3.25233	2.05665	2.17411	1.404	0.446683	1.62387	1.30435	5.50861	1.44161	3.16035	4.69037	5.0521
hsa-miR-19a-5p	MIMAT0004490	0	0	0	0.225802	0	0	0	0	0	0	0	0	0	0	0	0	0	0	0	0	0	0.132594	0	0.210761	0.371008	0	0	0	0	0	0	0	0	0	0	0.668813	0	0	0	0	0	0	0	0	0	0	0	0
hsa-miR-19a-3p	MIMAT0000073	56.7506	54.7163	32.0229	110.191	43.9367	84.227	68.822	20.6362	64.5108	13.2623	12.3099	13.7542	23.5132	43.0182	39.5724	95.8661	27.8155	51.6689	89.0896	114.435	74.5389	39.3805	32.321	35.4078	70.6768	35.2184	63.6198	17.5229	22.2937	18.4669	10.8163	8.11308	38.5368	13.6038	152.709	199.306	106.514	53.9871	37.5034	7.64397	18.7607	121.52	41.0871	32.0024	12.0134	17.9087	29.1297	98.6362
hsa-miR-19b-1-5p	MIMAT0004491	20.6366	10.8349	7.70922	15.5803	8.34241	11.9471	24.8818	6.87874	9.55716	3.14107	4.29414	8.81682	13.0122	14.6892	10.5526	10.9353	2.31796	8.15825	8.66149	14.5314	10.4008	19.4914	6.0983	13.9102	20.5909	15.2246	38.2289	7.03147	7.57986	5.1465	7.72593	3.60581	8.65996	6.80188	21.0829	26.7525	18.7009	16.4532	7.06586	3.58799	11.6138	7.30742	5.21741	10.4926	2.88322	6.67186	27.6485	34.1618
hsa-miR-19b-3p	MIMAT0000074	194.573	119.726	83.6154	309.575	163.789	381.709	227.642	123.192	190.347	82.0168	75.8631	108.623	115.283	150.039	140.878	314.207	136.18	198.517	314.288	333.185	191.259	214.272	138.736	211.393	322.776	142.524	221.385	72.1005	112.806	66.6018	136.749	45.0727	237.067	94.7875	319.663	471.513	209.775	134.711	139.143	47.7358	93.3568	256.301	103.044	176.407	86.9771	128.521	118.247	331.755
hsa-miR-19b-2-5p	MIMAT0004492	0	0	0	0	0	0	0	0	0	0	0	0	0	0	0	0	0	0	0	0	0	0	0	0	0	0	0	0	0	0	0	0	0	0	0	0	0	0	0	0	0	0	0	0	0	0	0	0
hsa-miR-20a-5p	MIMAT0000075	230.687	314.754	171.975	441.895	124.858	338.103	581.811	163.839	424.497	140.65	293.719	260.978	483.049	480.545	164.621	346.284	114.159	191.719	305.627	390.013	247.307	1164.04	380.839	470.419	604.185	311.096	1083.96	343.091	219.37	95.0589	253.024	148.74	361.77	210.42	368.666	560.465	869.184	783.584	291.874	78.7797	224.235	310.43	78.9133	322.909	215.28	203.667	467.556	1045.3
hsa-miR-20a-3p	MIMAT0004493	19.8996	21.1281	5.33715	24.6124	5.00545	18.518	28.0582	1.87602	23.0965	6.98016	3.14903	19.0443	4.56568	20.9845	7.91448	20.048	9.85131	13.5971	19.7977	15.0504	9.82296	15.1157	2.74424	10.7488	22.2604	10.8223	9.98517	3.34832	14.7138	6.35744	18.1559	4.50727	37.2378	10.3125	32.4791	27.4213	23.5794	25.7081	18.4799	5.61598	13.4005	21.1103	7.82611	22.4279	9.61073	18.2598	5.92468	19.2461
hsa-miR-21-5p	MIMAT0000076	250420	315627	330666	293762	207165	238206	356310	223587	325721	369020	293928	383675	235269	194741	251984	151843	215572	292674	177715	231078	148509	188993	403431	369208	388420	429223	475017	454412	55657.6	347725	150585	358876	158342	172440	243492	427585	182208	243042	323191	268124	210167	302553	289200	131366	220126	256431	322975	381742
hsa-miR-21-3p	MIMAT0004494	5446.58	4162.23	3982.11	4362.72	4226.82	5116.34	9140.62	2915.96	5920.66	6487.71	6451.51	5503.11	5996.56	4019.58	3999.45	3473.78	3112.44	7847.55	6804.22	2860.1	5073.27	3922.54	1581.29	5445.64	6698.9	7464.64	5220.53	2562.25	1084.81	3632.22	1824.86	3975.41	2337.54	2314.18	5504.92	7605.07	2617.31	6108.25	4554.22	2771.64	2463.01	2453.4	3848.49	2208.16	3761.64	5356.1	6823.26	8131.96
hsa-miR-22-5p	MIMAT0004495	85.4944	36.297	46.8483	42.225	78.9748	44.8016	30.7052	20.6362	34.2465	29.3167	23.1883	21.513	31.0466	8.3938	20.5777	24.0576	53.313	63.2264	50.7316	27.2464	16.7568	8.22084	53.0552	45.3136	69.1928	44.023	34.6628	37.7244	9.36336	44.8048	12.7478	13.9725	17.9694	25.6716	43.8753	74.2382	42.2802	19.024	25.5458	15.9119	24.1209	32.7481	114.783	8.78754	25.949	68.4743	32.5857	25.9822
hsa-miR-22-3p	MIMAT0000077	51280.4	93378.6	105754	78770.9	119313	87131.3	69344.5	68212.8	89416.8	90556.7	151049	66184.3	144139	70189	93242.1	61075.1	97267.2	89883.5	115294	90660.3	70760.6	30256.9	105108	103566	127733	148037	73498.7	89079.7	34595.8	91376.4	51027	120931	47919.7	53608.7	37834.2	32230.1	131896	45096.2	52208	65012.5	76738.4	55000.8	67965.8	23794.4	87239	94835.9	108823	70688.2
hsa-miR-23a-5p	MIMAT0004496	5.15915	1.62524	2.96508	4.74184	1.94656	2.98677	11.1174	8.12942	2.38929	1.74504	12.0236	7.7588	13.697	6.29535	1.5829	5.10314	4.63591	2.71942	7.42413	1.29745	1.15564	0.928159	2.74424	6.95511	3.71007	6.9703	4.27936	2.79027	8.91748	0.908206	2.70407	1.35218	1.29899	5.04656	3.98866	4.01288	0	2.05665	2.17411	1.55999	3.12678	0.811936	2.6087	1.04926	6.72751	13.3437	1.72803	4.81152
hsa-miR-23a-3p	MIMAT0000078	11688.4	6114.14	4975.41	4290.01	3128.96	3444.35	5656.11	3917.13	5089.19	4160.87	5609.86	11607.9	7217.88	5122.32	3977.82	6181.72	3185.45	6687.72	5610.17	4003.93	5251.82	1703.84	3483.66	5644.81	4088.68	5444.54	4009.47	3308.48	5904.71	4309.74	3835.15	4326.07	2526.33	3326.56	10781.4	2916.69	1751.38	5532.91	4138.96	2672.74	5009.55	8061.44	4646.75	1458.47	3146.55	4543.18	4139.13	4870.7
hsa-miR-24-1-5p	MIMAT0000079	30.2178	18.9611	15.4184	30.9349	43.6586	25.0889	16.9408	17.5095	29.4679	27.9206	10.3059	13.0489	11.8708	18.8861	10.5526	23.6931	38.2463	65.9458	45.7822	24.911	24.2685	7.55787	19.5146	22.5514	17.4373	22.7452	11.8396	12.054	86.4996	19.0723	12.3615	12.6203	22.5159	18.4309	5.69809	15.3827	13.8224	9.25493	28.807	6.39597	27.2477	33.2894	19.5653	18.362	6.72751	10.5345	14.0711	15.6374
hsa-miR-24-3p	MIMAT0000080	9312.26	2096.56	1688.91	2409.76	1860.64	1639.74	2728	1543.34	2883.87	2316.71	2629.44	4387.25	2828.44	2897.96	1713.75	3030.9	1740.21	3554.28	3139.17	1596.12	2442.45	1134.48	1911.51	5061.85	3237.04	2838.01	3477.41	2728.55	4699.07	1749.2	3885.37	1465.76	5051.79	3303.08	6883.29	4024.25	1005.78	1821.16	2622.52	2067.62	1534.8	4354.95	3135.01	2424.57	4186.43	2630.47	1664.34	2049.23
hsa-miR-24-2-5p	MIMAT0004497	92.1276	31.4213	28.4648	63.4504	60.3435	34.6466	40.7638	33.143	54.9537	31.7597	20.8981	70.1819	17.3496	36.7229	30.075	34.9929	46.9386	84.3019	69.2919	46.7082	53.7374	7.55787	39.3341	48.6858	53.6105	40.3544	32.5231	30.0233	53.5049	39.6583	18.1559	18.9305	14.9384	26.5493	155.558	72.9006	9.75698	62.7279	48.9175	14.5079	37.5214	38.4316	37.8262	10.7549	15.8577	41.0846	18.7615	31.5155
hsa-miR-25-5p	MIMAT0004498	4.42212	0	0.593017	0.677406	0.27808	0	0	0.62534	0.79643	0	0.572552	0	0	1.04923	0	1.45804	1.15898	0	0	0.51898	0.577821	0.265188	0.304915	0	0.185504	0.733716	1.71174	1.22772	0.891748	0.302735	2.31778	0.450727	1.29899	2.41357	0	0.668813	1.62616	4.62747	2.71764	0.623998	0	0.270645	1.95653	1.18041	0.480536	0.35115	2.71548	2.16519
hsa-miR-25-3p	MIMAT0000081	7492.55	7929.53	9718.95	7760.82	5935.63	12461.4	13456.8	5548.02	11146	5406.13	9243.85	9441.75	6854.23	15895.8	5490.01	24317.2	11792	11157.8	10552.2	8922.82	10848.6	28101.6	9737.47	10645.7	6650.3	9160.44	7018.86	10881.1	19794.6	5878.21	27454.9	6069.48	18209.7	28255	2974.97	4775.99	18056.1	46580.1	21300.8	8820.68	10458.2	4840.22	10924.6	16482.8	19297.9	9529.17	20727.7	18558
hsa-miR-26a-5p	MIMAT0000082	2842.69	1643.66	1710.85	1559.62	2030.54	1876.89	1528.38	2519.5	1700.38	2336.61	1748.57	1460.42	2375.75	1770.04	1681.04	1594.37	1863.06	1723.43	967.612	1625.18	1237.12	834.946	2284.42	2945.81	2316.75	1699.65	3122.79	1470.92	2101.41	1844.26	2382.68	1582.5	2076.01	2696.4	3140.79	3019.02	1707.47	1286.44	1315.88	4246.46	1922.97	2219.02	2973.92	1177.79	1667.94	2660.32	2500.71	2302.79
hsa-miR-26a-1-3p	MIMAT0004499	8.10723	9.75143	11.2673	9.03209	5.00545	7.16825	11.1174	6.87874	7.9643	8.02718	0.286276	13.4016	0.456568	12.5907	7.38685	17.861	3.47694	5.43883	7.42413	12.196	12.7121	0.397783	0.304915	0.843044	1.11302	1.83429	1.14116	0	16.9432	7.26565	0.772592	5.85945	0	1.09708	17.6641	6.68813	17.0747	8.74077	15.2188	0	11.6138	17.0507	25.4349	0.786944	1.92215	0.35115	0.493724	1.44346
hsa-miR-26b-5p	MIMAT0000083	1111.43	391.682	650.539	920.821	990.244	966.519	641.633	899.24	838.641	882.292	338.664	1094.34	446.523	489.988	546.099	644.453	1445.25	1226.46	1040.62	652.617	671.428	278.448	683.315	861.38	1406.67	752.609	482.854	497.002	1252.91	781.36	562.834	384.019	770.304	794.504	1571.53	2011.12	573.222	372.254	841.381	730.389	770.082	678.237	813.263	729.366	642.958	924.228	384.117	601.922
hsa-miR-26b-3p	MIMAT0004500	33.1659	16.2524	38.5461	46.9668	44.7709	40.0227	22.2348	40.0218	31.8572	29.6657	24.6197	37.0306	40.178	18.8861	22.6882	48.4798	41.7232	40.7912	64.3425	33.2147	27.1576	21.0825	17.3802	33.9325	40.4398	40.7212	14.2645	12.612	82.4867	29.6681	13.9067	21.1841	24.6809	22.3804	46.7243	36.7847	29.2709	13.3682	38.0469	15.9119	38.8614	40.5968	29.3479	20.7229	23.5463	24.2294	31.3514	23.3359
hsa-miR-27a-5p	MIMAT0004501	122.345	14.0854	14.2324	11.7417	8.06433	5.97354	87.351	16.2588	44.6001	17.7994	36.9296	59.9544	53.875	31.4768	10.025	32.8059	5.79489	28.5539	17.323	13.4935	53.7374	2.78448	6.70814	30.3496	15.0258	24.0292	47.6435	16.0719	35.2241	17.2559	32.0626	8.11308	18.6189	21.7221	109.973	61.5308	12.1962	72.497	63.0492	13.104	29.4811	9.20194	16.9566	24.5264	39.404	60.0467	9.6276	32.9589
hsa-miR-27a-3p	MIMAT0000084	9066.09	1502.8	1302.26	1584.45	1451.3	1581.79	2400.83	1318.84	2278.59	1334.26	1783.78	5040.4	2432.82	977.878	877.452	1399.72	1515.36	4169.54	1839.95	955.96	1762.93	655.281	2390.54	5650.92	4076.44	4395.88	3339.75	2145.27	1491	1328.71	2968.3	825.28	1363.51	2133.16	5149.93	2084.02	396.784	1067.92	1203.91	1796.96	1152.89	1831.46	2965.44	612.767	1860.16	3985.56	1360.21	2797.9
hsa-miR-28-5p	MIMAT0000085	205.629	124.602	83.6154	142.481	105.671	114.095	158.291	89.4237	71.6787	156.356	139.13	107.565	148.385	163.679	137.184	89.6694	115.318	154.327	146.008	110.543	132.321	154.075	108.55	230.151	117.98	141.057	179.733	123.218	186.821	128.965	69.5333	108.625	106.951	149.861	182.339	105.004	198.392	141.395	164.145	105.456	154.552	156.704	135.653	84.9899	181.162	59.3444	133.058	75.0598
hsa-miR-28-3p	MIMAT0004502	6841.03	6019.88	5076.82	7186.83	4968.46	5845.11	5828.69	3482.52	3327.48	4796.41	5259.17	4233.48	3518.77	8537.55	5644.61	7144.39	4231.43	8619.87	6713.89	5153.99	6710.82	4548.65	4756.37	8273.84	3971.07	5162.79	3093.83	3925.57	9098.06	4213.77	3883.05	4700.18	8189.51	10508.5	3986.95	2239.18	7578.73	7597.27	4391.7	5159.53	6208.45	8191.35	3863.49	5614.84	17287.3	4762.3	3453.35	4225.72
hsa-miR-29a-5p	MIMAT0004503	11.7923	11.3767	11.2673	7.67727	10.5671	8.96032	10.588	10.6308	5.57501	19.5444	5.72552	7.7588	7.76166	10.4923	15.3013	11.2998	15.0667	14.2769	11.1362	14.2719	2.88911	1.59113	6.40322	6.32283	10.0172	6.78687	6.98962	3.79476	4.01287	12.1094	2.70407	12.6203	1.51549	2.41357	14.815	18.0579	6.50465	11.3116	10.327	1.87199	10.7204	9.74323	8.47828	0.655786	0.961072	2.8092	7.15899	8.66074
hsa-miR-29a-3p	MIMAT0000086	4324.84	7555.19	5789.62	4519.66	6089.41	5810.47	5923.99	12299.8	5857.74	15760.1	7295.45	5137.38	8104.54	5689.95	6279.35	3031.99	6046.39	4101.56	3931.08	5117.14	2503.7	1180.88	8367.48	8863.76	15780.6	4790.61	9737.11	6574.65	1923.95	7331.34	8222.32	4109.27	4084.04	5854.23	3104.32	6565.07	3916.61	2824.81	5207.54	19126.9	4994.81	5270.28	3504.79	2009.33	4040.35	11578.5	9309.15	8694.66
hsa-miR-30a-5p	MIMAT0000087	8821.4	6941.93	22848.9	5986.69	19232.6	5895.29	9181.38	12611.2	11282.2	16045.3	21615.3	33293.7	19358.3	13431.1	5559.13	27934.9	9077.12	5497.3	10162.4	49071.6	13491	1959.35	8465.06	15102.7	5037.9	7974.21	4613.86	8354.17	15077.2	27082.4	7656.39	23547.3	19821.4	16542	18776.3	135786	21204.4	33715.2	9849.26	11726.8	16603.2	14461.1	8253.28	3569.84	6315.69	3087.31	4183.81	13824.7
hsa-miR-30a-3p	MIMAT0000088	1281.68	1765.01	4476.09	2000.38	8556.81	2639.11	1902.13	2383.17	2550.97	3760.56	4650.55	9920.33	4344.7	3613.53	1974.4	9796.2	4302.71	2314.22	5029.85	11735.9	4700	619.348	1447.13	3410.32	1360.67	2781.33	868.852	1514.22	3049.33	6708.92	7404.53	5370.86	11047.9	11954.6	1815.98	13023.1	5135.42	6944.8	2176.28	8962.79	3831.2	3437.2	1693.05	3259.78	6146.54	1957.31	1168.89	3340.4
hsa-miR-31-5p	MIMAT0000089	54.5395	2.16698	4.74413	3.61283	5.00545	47.7884	170.996	25.0136	12.7429	16.4034	22.6158	39.852	17.5779	4.1969	16.8842	19.319	7.53336	61.1869	27.2218	2.07592	15.0234	10.4749	3.35407	0	32.0921	126.566	8.41607	8.81724	2.22937	72.051	65.2841	9.01453	13.6394	1.97474	444.451	712.954	3.25233	71.4686	170.668	7.33197	14.7405	3.78903	41.7393	38.6914	2.88322	0.35115	4.19665	3.84922
hsa-miR-31-3p	MIMAT0004504	21.3736	1.08349	1.77905	2.48382	1.66848	27.4783	50.8224	12.5068	3.18572	4.5371	11.451	14.8123	10.0445	2.09845	8.44211	10.2063	8.11285	44.8704	47.0195	1.29745	2.31128	9.67938	2.43932	0.210761	17.6228	69.1527	5.42052	2.34383	0.445874	23.3106	25.4956	5.85945	6.27847	0.219416	131.626	253.48	1.62616	4.62747	58.1575	3.43199	1.34005	4.87162	14.3479	5.37745	0.961073	0	3.2092	1.44346
hsa-miR-32-5p	MIMAT0000090	76.6502	41.7144	40.3251	23.2576	23.3588	18.518	43.4108	31.267	29.4679	53.0492	13.455	20.8077	18.491	33.5752	34.8237	86.0243	22.0206	38.0718	28.4592	22.0566	40.4475	25.8559	36.2849	96.9501	91.4532	22.5618	65.1889	41.1843	39.2369	25.4298	25.4956	12.6203	36.5883	37.7395	38.747	45.4793	17.8878	10.7974	11.9576	24.4919	29.9278	86.6065	31.9566	16.2635	11.0523	22.1225	20.9832	33.4401
hsa-miR-32-3p	MIMAT0004505	1.47404	1.62524	0.593017	0.225802	0.83424	1.19471	2.647	0.62534	1.59286	2.09405	0.858828	1.05802	0.456568	2.09845	1.05526	1.82255	0	2.71942	6.18678	1.03796	2.31128	0.92816	1.52458	3.16141	1.48403	0.366858	2.28233	0.669664	0.891748	0.908206	0.386296	1.35218	1.08249	1.75533	1.70943	1.33763	0	0	0.543528	0.155999	0.446683	0.541291	2.6087	1.18042	0.480536	0.35115	0.246862	0.962304
hsa-miR-33a-5p	MIMAT0000091	241.006	66.093	14.8254	48.3217	61.1777	61.5275	158.291	48.7766	48.5822	55.1432	21.4707	56.4276	39.4931	64.0028	17.9395	219.07	60.8464	86.3415	61.8678	23.8731	121.342	81.0151	39.3341	169.873	204.981	146.927	123.246	34.4877	61.9765	31.7872	48.6733	14.4232	56.5063	30.9376	107.694	31.4342	12.1962	52.9588	20.654	13.104	58.9622	223.824	282.392	84.9899	28.8322	31.9547	23.205	32.9589
hsa-miR-33a-3p	MIMAT0004506	3.6851	2.16698	2.37207	2.70962	0.55616	2.98677	3.1764	3.1267	2.38929	2.44306	1.71765	1.05802	3.19598	5.24613	1.5829	5.46765	1.15898	1.35971	3.71207	1.55694	2.88911	3.71264	3.04915	4.8475	5.93611	4.4023	3.70878	2.23221	5.35049	2.42188	6.95334	0.901454	5.84548	10.7514	3.41885	2.00644	0	1.02833	3.26117	2.18399	4.46683	6.49549	3.26088	5.11513	15.3772	7.72531	3.2092	1.92461
hsa-miR-92a-1-5p	MIMAT0004507	8.10723	3.79222	1.18603	8.58048	2.50272	1.19471	20.1172	3.75204	5.57501	2.79206	0.858828	6.34811	5.7071	5.24613	1.05526	2.91608	0.579489	4.07912	7.42413	6.22776	8.0895	1.72372	0.914746	0.210761	6.12162	2.01772	9.98517	2.00899	1.33762	1.21094	14.6793	2.70436	5.19598	7.0213	21.0829	10.701	4.06541	9.7691	3.26117	1.404	3.57347	1.35323	4.56523	31.8712	4.80536	5.61841	7.15899	17.0809
hsa-miR-92a-3p	MIMAT0000092	5016.16	9786.1	4972.45	17648.9	5892.8	15188.9	16546.4	5212.21	12098.6	5873.1	13816.2	7763.38	20488	14703.8	9819.23	22519	5152.82	7927.1	17282.1	14974.4	10853.8	33612.5	8294.3	15344.9	26842	14936.4	21501.2	9454.88	7818.85	3895.29	30944.7	3986.23	31832.5	13952.6	4279.26	6805.84	22842.7	29626.1	8926.35	8361.57	6624.76	5284.89	2625.66	43108.5	20391.1	17760.5	17961.7	33146.8
hsa-miR-92a-2-5p	MIMAT0004508	0	0	0	0	0	0	0	0	0	0	0	0	0	0	0	0	0	0	1.23736	0	0	0	0	0	0	0	0	0	0	0	1.15889	0	0	0	0	0	0	0	0	0	0	0	0.652176	0.131157	0	0	0	0
hsa-miR-93-5p	MIMAT0000093	4520.88	5592.44	5287.34	5065.65	2375.08	7717.22	7878.53	2964.11	8697.81	3194.12	6865.18	5756.32	5507.12	12572.9	3562.57	16827.6	7092.95	5879.38	7980.94	6080.37	7993	25041.9	7365.53	8234.43	4029.14	4870.41	6950.11	9680.67	12088.1	2257.5	6763.28	3951.07	10610.8	6946.48	2990.93	4244.95	8319.45	18759.7	9392.7	1628.95	6412.14	5877.06	4181.1	5613.4	6681.38	2439.09	10000.4	12486.6
hsa-miR-93-3p	MIMAT0004509	24.3217	16.2524	16.0115	28.6769	17.241	32.8545	14.2938	6.2534	13.5393	11.1683	15.1726	25.3924	15.295	22.0337	11.0803	47.0218	45.2001	40.1114	44.5448	24.392	38.1362	44.5517	14.331	21.2869	13.1708	18.8932	12.2675	9.93335	69.1105	10.5957	12.3615	10.3667	34.8564	19.7474	18.2339	16.7203	26.8317	67.8695	47.8304	3.89999	27.2477	24.6287	23.4783	20.5917	10.0913	9.83221	34.5606	28.388
hsa-miR-95-5p	MIMAT0026473	0	0	0.593017	0.225802	0	0	0	0.62534	0	0	0	0	0	0	0	0	0	0.679854	0	0	0	0	0	0	0	0	0.142645	0	0	0	0	0	0	0	0	0	0	0	0	0	0	0	0	0	0	0	0	0
hsa-miR-95-3p	MIMAT0000094	2.94808	7.58444	6.52318	2.25802	5.56161	4.77883	2.1176	1.87602	1.59286	1.39603	0.858828	3.8794	4.56568	0	2.63816	1.45804	1.73847	35.3524	1.23736	3.63286	6.93386	5.56896	2.74424	0	4.08108	4.21887	5.13523	1.67416	2.22937	2.72462	0.386296	2.25363	1.29899	2.63299	8.54713	9.36338	12.1962	1.02833	2.17411	3.74399	1.34005	3.51839	7.17393	0.393472	0	1.05345	1.97489	10.8259
hsa-miR-96-5p	MIMAT0000095	50.8544	22.2116	43.2902	34.3219	17.5191	17.9206	32.2934	8.75477	35.8394	39.0889	22.9021	49.3742	11.6425	37.7721	50.125	150.178	92.7183	40.1114	102.701	27.5059	79.7393	75.4461	26.5276	87.2551	84.9606	35.5852	24.535	39.5102	102.997	22.4024	27.0407	9.01453	67.3312	80.7449	18.2339	47.4857	9.75698	37.0197	51.6351	9.20397	33.5012	142.089	22.174	14.8208	16.8188	5.26726	23.9456	26.704
hsa-miR-96-3p	MIMAT0004510	0	0	0	0	0.556161	0.597354	0.5294	0	0	0.698016	0.286276	0	0.456568	0	0.527632	0	0.579489	0	1.23736	0.51898	0	0.397782	0	1.47533	0.371008	0.366858	0	0.223221	0	0	0	0	0.216499	0.877663	0	0	0	0	0	0	0	0.54129	0	0.131157	0	0	0.246862	0.240576
hsa-miR-98-5p	MIMAT0000096	58.9617	47.1319	40.9182	79.4824	55.0599	40.0227	30.7052	42.5231	54.1572	42.23	38.6472	71.5926	33.3295	124.858	69.1198	90.7629	107.785	57.7876	176.942	38.145	68.7607	31.8226	63.1175	79.0354	97.0183	51.9104	48.0715	59.6001	73.1234	49.0431	99.2782	49.5799	63.2177	98.5176	67.8072	58.8555	25.2055	57.0721	102.183	64.8958	78.1696	44.6565	32.6088	47.7413	116.29	46.703	67.6401	37.2893
hsa-miR-98-3p	MIMAT0022842	2.94808	0.541746	0.593017	3.83864	0.27808	1.19471	1.5882	1.25068	0	0.349008	0.286276	2.11604	1.14142	2.09845	1.05526	4.37412	4.05642	1.35971	6.18678	2.85439	1.73346	1.19335	2.74424	2.10761	5.3796	2.20115	0.427936	1.78577	4.45874	0.908206	1.54519	1.35218	4.32998	3.51065	2.84904	0.668813	0	0.514163	1.08706	1.87199	3.57347	7.03678	1.30435	2.22967	1.92214	2.45805	0.987446	0.962305
hsa-miR-99a-5p	MIMAT0000097	177.622	224.825	315.485	518.216	635.414	310.624	178.937	981.159	185.568	310.617	506.422	525.482	648.326	337.851	262.761	695.849	626.428	107.417	150.957	513.53	583.599	402.556	329.918	426.369	210.176	497.276	290.996	131.031	1749.16	507.082	6143.27	343.003	513.536	1052.32	395.447	69.5565	85.3736	116.715	350.575	371.747	1686.68	376.197	911.09	350.846	510.33	119.04	342.644	1208.17
hsa-miR-99a-3p	MIMAT0004511	0	1.62524	1.18603	3.38703	3.61504	2.98677	0.5294	3.75204	0	2.09405	1.71765	3.52673	4.3374	1.04923	2.63816	3.6451	2.89744	0	1.23736	3.11388	2.88911	2.2541	1.21966	2.52913	0.927518	3.48515	0.570581	0.446444	7.57986	2.72462	49.0596	0.450727	2.38149	3.73007	3.41885	0	0	0.514163	0.543528	2.65199	9.38035	1.89452	9.13046	3.6724	1.92215	0.35115	1.23431	10.8259
hsa-miR-100-5p	MIMAT0000098	2884.7	3917.36	6207.7	5534.41	9902.44	5070.34	2963.58	7679.18	5585.36	12629.2	7188.67	4253.94	6816.79	4253.56	5904.2	3484.35	5624.52	1965.46	3809.82	4573.77	1855.38	2864.7	5365.9	4188.03	5092.26	1310.42	5666.58	412.513	1161.06	5528.25	4025.59	8723.36	3334.52	2212.59	1333.35	2323.46	2977.5	1496.21	4567.81	7554.74	5934.63	3943.57	6962.63	1517.62	4064.86	1247.64	8542.89	5222.91
hsa-miR-100-3p	MIMAT0004512	0	0	0	0.677406	0	0	0	0.62534	0	1.04702	0	0.352673	0.228284	0	0.527632	0	0	0	1.23736	0.25949	0	0.265188	0	0.210761	0.185504	0	0.427936	0	0	0.302735	0	0.450727	1.08249	0	0.569809	0.668813	0	0	0	0.467998	0	0.270645	1.30435	0	0	0	0.246862	0.240576
hsa-miR-101-5p	MIMAT0004513	16.2145	8.66793	4.74413	6.32246	10.8451	8.96032	5.8234	7.50408	3.98215	9.0742	4.00786	10.5802	4.79396	3.14768	5.27632	12.0288	12.1693	6.79854	2.47471	7.00623	5.20039	2.91707	6.0983	9.27348	6.30712	4.76915	7.84549	3.01349	7.57986	9.68753	6.56704	3.15509	1.94849	1.75533	6.8377	10.0322	12.1962	9.25493	3.80469	3.43199	6.25356	14.8855	13.0435	1.8362	1.92214	2.8092	6.66526	12.0288
hsa-miR-101-3p	MIMAT0000099	12339.9	9588.36	10147.1	5414.06	10886.6	5245.37	10343.9	13958.8	9876.53	13390	9750.27	10252.5	13982.4	11278.1	6078.85	8870.34	8084.45	3435.3	5455.5	6355.16	5970.05	13287.7	9968.59	12038.7	6325.86	7279.38	15560.3	5659.44	7534.38	12867.8	10790	9851.98	6832.71	5405.52	5368.74	7969.57	5447.65	3410.44	6678.32	12660	11717.4	9069.87	9091.33	8592.11	3835.64	4697.34	18113.5	13241.1
hsa-miR-29b-1-5p	MIMAT0004514	7.37021	7.0427	8.89525	6.09666	9.17665	8.36296	10.0586	13.1321	4.77858	15.7054	5.43924	6.34811	10.0445	8.3938	14.7737	8.01921	11.0103	10.1978	18.5603	9.34163	8.0895	0.795564	2.43932	3.58294	6.12162	3.48515	2.13968	4.57604	1.33762	5.44923	5.40815	5.40872	0.865996	3.29123	11.3962	11.3698	5.69157	4.62747	7.06586	2.18399	7.14693	4.05968	9.13046	1.70504	2.88322	4.56495	5.1841	8.42016
hsa-miR-29b-3p	MIMAT0000100	544.658	1210.8	964.245	898.241	951.591	1116.46	873.51	2727.73	907.93	1674.89	427.123	772.353	745.575	1106.93	1355.49	504.481	959.054	629.545	892.134	1213.63	539.107	91.3574	1495.61	1003.43	1726.11	599.813	1280.24	836.411	263.066	1024.15	383.592	329.481	163.24	143.498	521.945	1098.19	502.484	210.807	525.591	991.065	977.343	821.138	504.784	188.08	91.3019	245.454	1028.18	1428.3
hsa-miR-29b-2-5p	MIMAT0004515	12.5294	10.8349	63.4528	27.0963	48.6641	26.2836	14.8232	37.5204	18.3179	37.3438	40.6512	28.5665	53.6467	40.9198	36.9342	38.2735	24.918	31.2733	77.9534	50.0815	36.4027	25.8559	26.8325	15.3856	20.4054	13.2069	10.841	11.9423	32.9947	34.5118	24.723	18.0291	21.0004	14.262	26.2112	18.0579	20.327	27.7648	27.7199	20.5919	34.8413	25.7113	5.21741	23.346	12.9745	6.32071	38.7573	20.2084
hsa-miR-103a-2-5p	MIMAT0009196	8.10723	2.16698	4.74413	6.32246	4.17121	11.3497	2.1176	4.37738	0.79643	1.04702	2.57648	1.05802	2.28284	2.09845	5.80395	8.01921	13.9077	12.2374	11.1362	5.1898	9.82296	2.65188	3.35407	2.95065	1.85504	2.20115	1.28381	1.56255	2.67524	1.21094	0	0.901453	1.08249	1.31649	7.97732	6.01931	1.62616	1.02833	3.80469	0.155999	1.78673	5.9542	12.3913	1.44273	0.961073	1.05345	0.740585	2.16519
hsa-miR-103a-3p	MIMAT0000101	9489.88	9474.59	15056.7	13196.8	11106	20738.4	9990.84	12701.9	14156.5	12072.9	19974	17382.5	21246.2	24347.3	9911.04	19568.7	25670.8	18504.9	24424.2	12728.5	19748.8	25517.6	21133.7	21694.7	10687.6	16708.4	20436.4	23183.8	22267.4	11405.6	23319.9	13575.4	38880.4	24987.7	19872.6	16050.2	18474	11556.8	23819	14707.9	16735.4	10310.2	11461.3	27911.8	33157	13053	16400.5	17852.4
hsa-miR-105-5p	MIMAT0000102	2.21106	20.5863	0	53.9667	1.11232	5.37619	37.5874	2.50136	89.9966	1.04702	111.075	2.82138	3.42426	804.756	11.6079	34.9929	343.637	80.2228	430.6	148.688	39.2918	58.3415	153.982	396.231	37.6572	413.449	0.28529	8.3708	943.47	23.9161	300.152	46.4248	686.302	4.38831	133.335	4.01288	647.213	678.695	2358.37	9.67196	100.95	341.013	176.087	417.08	40.3651	1.4046	21.2301	235.043
hsa-miR-105-3p	MIMAT0004516	0	0	0	0.451604	0	0	0	0	0	0	0	0	0	0	0	0	0	0	1.23736	0	0	0	0	0.843044	0.185504	1.284	0	0	0.445874	0	0	0	0.216499	0	0	0	0	0	3.26117	0	0	0.54129	0.652176	1.04926	0	0	0	1.20288
hsa-miR-106a-5p	MIMAT0000103	103.92	68.26	23.7207	54.8699	9.45473	23.2968	110.645	31.267	102.739	29.3167	4.86669	63.4811	15.0667	82.8888	21.6329	61.2376	23.1796	16.3165	16.0856	27.5059	29.4689	37.922	24.0883	12.2241	18.5504	10.4555	26.96	10.4914	45.925	15.4395	16.997	22.0856	12.3404	3.94948	75.7846	109.016	128.467	99.7476	36.4164	5.30398	33.5012	31.3949	49.5654	18.6243	4.32483	5.26726	11.6025	18.0432
hsa-miR-106a-3p	MIMAT0004517	0.737021	0	0	0.451604	0.27808	0	0	0	0	0	0	0.352673	0	0	0	0.72902	0	0	0	0	0.577821	0.132594	0	0	0	0.183429	0.427936	0.111611	0	0	1.15889	0	0.649497	0	0	0	0	0	0	0.311999	0	0.270645	0	0.655786	0	0	0	0.240576
hsa-miR-107	MIMAT0000104	63.3838	45.5067	78.2782	41.096	34.2039	55.554	46.5872	81.9196	51.768	57.9353	89.0318	82.8781	131.035	66.1012	33.7685	75.818	67.8002	44.1905	58.1557	40.9994	69.3386	158.185	67.0814	106.434	76.4275	54.4784	89.7239	91.4092	48.6003	40.8693	87.6893	50.9321	95.9091	111.683	85.4713	93.6338	117.084	36.5056	98.3785	68.6398	84.8698	41.1381	71.7393	116.861	72.0805	47.4053	136.514	63.031
hsa-miR-16-2-3p	MIMAT0004518	37.5881	13.5436	11.2673	12.1933	10.0109	9.55767	17.4702	7.50408	13.5393	8.02718	5.15297	16.2229	11.4142	29.3783	17.9395	13.4869	5.79489	22.4352	22.2724	16.0884	21.9572	14.5854	19.5146	36.6724	20.2199	13.3903	32.6658	18.4158	28.5359	6.96291	30.9037	4.95799	6.27847	17.1144	15.9546	28.0901	14.6355	27.2506	10.327	7.79997	17.4206	15.4268	19.5653	17.7062	5.76644	12.9926	13.5774	17.8026
hsa-miR-192-5p	MIMAT0000222	541.71	524.952	526.599	279.091	289.76	723.396	193.76	390.838	636.348	229.996	247.629	529.714	337.632	2066.97	520.245	2712.32	492.566	582.635	627.339	1049.38	2395.65	463.417	339.676	407.19	370.08	235.89	443.77	763.082	863.658	242.188	197.397	338.045	201.777	345.799	936.196	438.072	12941.8	284.332	575.052	180.803	772.762	3074.26	1233.26	86.1703	149.447	174.873	446.573	820.365
hsa-miR-192-3p	MIMAT0004543	1.47404	0	1.18603	0.451604	0.834241	0.597354	0	0.62534	2.38929	0.698016	1.43138	2.82138	0.913136	0	0.527632	2.18706	1.73847	0.679854	0	1.81643	0.577821	1.19335	0.914745	1.47533	0.556511	0.366858	0.855872	2.00899	3.12112	0.302735	0	0	1.73199	0.658247	0	0.668813	8.13082	1.02833	1.63058	0.623997	1.78673	3.24774	1.30435	0.786944	0	1.4046	1.72803	2.88691
hsa-miR-196a-5p	MIMAT0000226	140.771	0.541746	10.0813	65.2568	3.61505	244.915	3.7058	13.1321	30.2643	3.49008	1.71765	3.8794	11.6425	4.1969	40.1	21.1416	140.236	14.2769	0	101.201	2.31129	656.076	5.48847	8.43044	9.46068	109.691	1.71174	18.1925	43.6957	16.9532	292.426	15.3247	5.62898	53.0986	659.838	64.8748	9.75698	3209.4	247.849	71.2917	305.085	138.57	17.6087	1498.08	2.88322	3.51151	707.999	26.2228
hsa-miR-197-5p	MIMAT0022691	0	0	0	0	0	0	0	0	0	0	0	0	0	0	0.527632	0	0	0	0	0	0	0.530376	0	0.210761	0	0.366858	0.142645	0	0	0	0	0	0	0.438832	0	0	0	0	0	0	0	0	0	0	0.480536	0	0	0.240576
hsa-miR-197-3p	MIMAT0000227	142.982	352.135	366.484	602.44	281.974	469.521	192.172	201.985	358.394	219.875	610.626	214.778	502.225	658.914	262.233	393.306	405.063	996.666	1182.91	228.611	484.792	782.704	459.507	423.63	248.575	550.654	386.141	172.327	441.861	194.659	288.563	160.459	553.372	365.327	347.013	498.934	238.233	502.851	623.97	187.043	255.056	300.958	236.74	176.275	473.809	465.626	733.426	213.632
hsa-miR-198	MIMAT0000228	0	0	0	0	0	0.597354	0	0	0	0	0	0	0	0	0	0	0	0	0	0	0	0.132594	0	0	0	0	0	0	0	0.302735	0	0	0	0	0	0	0	0	0	0	0	0	0	0	0	0	0	0
hsa-miR-199a-5p	MIMAT0000231	477.589	747.068	1241.18	2512.95	2321.14	2400.77	664.397	922.377	880.852	836.223	1245.01	772.001	1320.39	541.4	663.761	481.882	1689.79	2803.04	1179.2	2171.41	342.648	346.734	1677.95	832.506	1054.77	979.144	1248	375.458	262.62	1285.72	409.088	1489.2	255.469	444.097	207.98	72.2318	141.476	281.247	774.527	561.286	1578.58	909.098	3238.7	282.513	618.45	626.804	1411.31	849.474
hsa-miR-199a-3p	MIMAT0000232	3776.49	5241.93	4421.53	7667.34	7379.42	6874.95	3986.38	3279.91	5144.14	3549.06	2176.27	3441.73	3262.41	3530.64	3925.58	1813.07	5902.68	8272.46	2988.21	8357.39	1561.85	1537.96	3364.13	2353.36	3024.26	5466.92	4516.44	1534.87	632.25	4578.87	1447.07	8153.64	795.851	1663.61	3553.9	1012.58	1103.35	804.151	2171.39	1547.83	7531.97	5943.1	28263.3	1085.72	1069.67	2607.99	4673.34	2360.29
hsa-miR-208a-5p	MIMAT0026474	0	0	0	0	0	0	0	0	0	0	0	0	0	0	0	0	0	0	0	0	0	0	0	0	0	0	0	0	0	0	0	0	0	0	0	0	0	0	0	0	0	0	0	0	0	0	0	0
hsa-miR-208a-3p	MIMAT0000241	0	0	0	0	0	0	0	0	0	0	0	0	0	0	0	0	0	0	0	0	0	0	0	0	0	0	0	0	0	0	0	0	0	0	0	0	0	0	0	0	0	0	0	0	0	0	0	0
hsa-miR-129-5p	MIMAT0000242	2.94808	45.5067	43.2902	2.93543	3.05888	2.98677	4.7646	0.62534	49.3787	2.09405	14.6001	0.705346	60.4953	6.29535	25.3263	51.7604	1.73847	15.6366	23.5098	12.196	40.4475	1.98891	10.9769	135.309	7.04913	13.3903	39.3701	52.1222	0.445874	2.11915	2065.53	0.450727	239.448	4.60773	0.569809	0.668813	1.62616	2.05665	4.89175	3.58799	6.25357	51.9639	3.26088	3.93472	25.4684	3.86266	3.70293	0.721728
hsa-miR-129-1-3p	MIMAT0004548	0	2.70873	1.77905	0	0.55616	0	0	0.62534	0	0	0.286276	0	1.82627	0	0	2.18706	0	0	0	0	2.31128	0.265188	0.60983	3.7937	0	0.366858	0.855872	4.46443	0	0	1.93148	0	9.74246	0.219416	0	0	0	0	0	0.311998	0.893366	3.24774	0	0	0	0	0	0
hsa-miR-148a-5p	MIMAT0004549	35.377	102.39	33.802	60.7408	81.1995	61.5275	70.9396	166.341	64.5108	74.6877	36.6433	68.7712	166.876	108.07	78.6172	31.7123	33.6104	15.6366	30.9339	63.056	49.1148	20.0217	79.278	87.8873	58.2481	16.5086	133.088	31.5858	22.2937	72.051	101.21	25.2407	40.4853	14.9203	30.7697	22.0708	147.981	28.7931	134.795	211.847	77.7229	44.9271	99.1307	13.2469	48.5342	23.5271	146.142	114.274
hsa-miR-148a-3p	MIMAT0000243	48347.1	150843	85520.1	131619	212609	179999	90587.7	315755	94877.9	90633.9	23906.9	77869.8	74211.7	148161	161679	71240.5	98998.2	61721.9	60451	165331	90307.7	15870.5	76061.1	41550.9	39975.1	11124.2	44165.4	18835.9	28715.6	102520	40048.5	35985.6	19406.8	8613.38	38591.4	35538.7	189695	41769.6	133391	82065.2	154103	94881.5	127145	9699.61	25635.7	19384.9	95994.6	100737
hsa-miR-30c-5p	MIMAT0000244	697.959	514.117	574.04	814.694	701.041	394.254	368.992	581.567	308.218	451.965	395.633	628.815	309.553	384.017	268.037	702.41	515.166	490.175	482.569	1135.53	450.701	431.196	652.214	429.109	302.185	290.185	247.632	271.66	2439.38	683.576	228.301	279.45	386.667	827.635	992.607	2362.25	753.727	558.895	890.298	235.871	379.234	767.009	708.263	363.568	291.205	388.021	274.51	505.932
hsa-miR-30c-2-3p	MIMAT0004550	5.89617	7.58444	18.9765	10.6127	42.2682	20.3101	6.8822	10.0054	10.3536	16.0544	58.4003	25.7451	44.9719	14.6892	11.6079	46.2927	15.6462	16.3165	17.323	87.967	16.7568	4.77339	17.99	38.9908	16.1388	35.2184	13.266	21.0944	11.1469	29.3653	18.5422	34.7059	60.4032	53.7568	12.5358	92.965	24.3924	35.4772	10.8706	41.9639	22.7808	23.0049	7.17393	11.673	27.3906	10.5345	10.6151	35.6053
hsa-miR-30d-5p	MIMAT0000245	5688.33	3857.77	9506.06	6075.43	4458.46	3019.63	3406.16	4753.84	3346.6	7808	12412.9	5233.66	11700.9	7909.06	4285.43	8532.08	2696.94	2486.23	8495.68	4359.69	4633.55	3357.95	4244.12	5551.66	7223.14	3737.37	4025.45	9243.04	9360.68	4777.77	8668.88	6124.47	8851.35	5119.18	4397.78	3254.44	4975.25	7487.24	5260.8	4248.96	5890.41	2669.65	3624.14	5961.23	3829.39	2312.33	3905.6	3913.93
hsa-miR-30d-3p	MIMAT0004551	7.37021	4.33397	5.93017	8.35468	4.44929	3.58413	2.1176	6.87874	4.77858	5.93314	4.29414	5.29009	4.79396	7.34458	2.63816	10.5708	2.89744	3.39927	11.1362	4.93031	5.77821	3.71264	2.13441	5.69055	10.7592	2.93486	6.13375	6.91986	4.45874	4.54103	5.40815	3.15509	5.19598	5.04656	2.27924	1.33763	2.43925	4.62747	2.17411	2.49599	5.80688	5.41291	2.6087	2.22967	3.84429	1.4046	3.94979	5.77383
hsa-miR-139-5p	MIMAT0000250	16.2145	13.5436	29.0578	27.5479	64.2366	11.9471	22.2348	40.6471	18.3179	46.7671	80.4435	14.8123	51.1356	28.3291	31.1303	40.4606	26.6565	8.8381	42.0701	58.6447	56.6265	22.4084	21.9539	24.4483	51.941	13.3903	15.1204	12.8352	20.9561	15.1368	7.33963	65.8061	7.36097	16.895	18.8037	22.0708	11.3831	31.8781	11.9576	22.4639	27.2477	52.5052	7.17393	6.42671	12.4939	21.069	18.0209	23.5765
hsa-miR-139-3p	MIMAT0004552	0.737021	2.16698	0.593017	4.06444	7.50817	2.38942	3.1764	3.75204	7.16787	3.14107	16.604	1.76336	13.697	3.14768	4.22106	4.00961	0.579489	0	3.71207	4.67082	2.88911	6.49712	3.65898	6.74435	7.42014	2.20115	3.99407	2.79027	2.22937	1.51368	5.79444	7.21163	9.95896	13.6038	0.569809	2.67525	3.25233	5.65579	1.63058	17.4719	2.23341	2.43581	3.26088	4.32819	14.8966	15.4506	6.4184	4.33037
hsa-miR-7-5p	MIMAT0000252	20.6366	1.62524	0	0.903208	0.27808	2.38942	3.7058	0.62534	0.79643	3.49008	0	1.05802	0.456568	2.09845	0.527632	1.09353	0.579489	2.71942	6.18678	3.89235	1.15564	11.6683	3.04915	1.47533	5.3796	0.550287	3.99407	4.91087	1.33762	1.21094	3.47667	0.450727	5.19598	5.04656	21.6527	18.0579	1.62616	1.54249	5.97881	3.27598	3.12678	12.4497	5.21741	4.32819	3.84429	3.5115	1.48117	1.44346
hsa-miR-7-1-3p	MIMAT0004553	36.851	27.0873	19.5696	19.6448	13.0698	29.2704	20.6466	30.6417	22.3	16.0544	17.1765	26.8031	16.893	62.9535	15.3013	15.6739	30.1334	23.7949	42.0701	16.8668	32.9358	65.369	22.5637	17.4932	20.9619	18.3429	23.6791	12.2772	24.969	20.586	24.723	11.2682	68.6302	50.685	50.1432	76.2446	21.1401	14.9107	58.701	29.1719	19.6541	41.4087	15	15.3454	48.5342	23.5271	32.8326	19.4867
hsa-miR-7-2-3p	MIMAT0004554	0	0	0	0	0	0	0	0	0	0	0	0	0	0	0	0	0	0	0	0	0	0	0	0	0	0	0	0	0	0	0	0	0	0	0	0	0	0	0.543528	0	0	0	0	0	0	0	0	0
hsa-miR-10a-5p	MIMAT0000253	16374.4	18561.8	20005.4	43693.2	35827.9	37614.8	18134.1	22095.8	18793.4	15466.3	22108.5	14921.6	17649.1	16795	27447.9	13902.4	27193.7	35560.4	27996.4	27834.7	20805	6941.84	24493.5	16028.2	13663.4	18359.6	18367.7	9609.12	12124.7	22564.7	41661.3	39712.6	20380.6	40714.1	14074.3	8865.11	6574.58	28913.9	30042.4	35146.2	28656.5	34201.7	16599.8	19066.7	28067.6	26536.8	13819.1	13397.7
hsa-miR-10a-3p	MIMAT0004555	2.94808	1.62524	1.77905	3.16123	2.7808	2.98677	1.5882	1.87602	3.98215	2.09405	2.00393	1.05802	1.59799	0	1.05526	0.729019	1.73847	2.71942	1.23736	2.07592	1.73346	0.795565	2.74424	3.58294	1.11302	3.30172	3.42349	1.45094	2.22937	2.42188	4.63556	1.35218	3.68048	4.82714	2.84904	1.33763	1.62616	3.08498	4.89175	3.74399	3.12678	2.43581	3.26088	2.7543	3.36375	1.75575	2.71548	0.962304
hsa-miR-10b-5p	MIMAT0000254	2936.29	18840.3	1777.86	12517.1	7858	11430.4	22940.5	22434.7	2765.21	4992.91	6414.3	11234	1861.66	14243.2	45889.7	41221.3	28066.4	18041.3	5643.58	26647.8	41797.9	2463.6	5493.35	14811.7	1050.14	7404.84	5364.18	11392.2	54672.7	11087.7	23634.8	6725.74	29826.6	17535.7	9707.26	17399.2	20283.1	1256.61	1527.86	21202.7	8511.55	14483.3	14820.7	347543	13451.7	32108.8	5824.7	9755.36
hsa-miR-10b-3p	MIMAT0004556	1.47404	8.12619	1.18603	2.70963	1.66848	4.18148	5.8234	5.62806	0.79643	1.04702	2.86276	3.17406	0.913136	5.24613	12.1355	7.2902	3.47693	4.07912	3.71207	5.1898	5.77821	1.98891	2.13441	14.121	0.556511	4.4023	4.84994	7.58953	14.7138	3.02735	3.47667	1.80291	10.6085	5.26598	3.41885	2.00644	3.25233	0	0.543528	7.79997	2.6801	4.05968	9.78264	122.239	3.84429	12.2903	5.92468	4.33037
hsa-miR-34a-5p	MIMAT0000255	156.985	72.5939	205.777	199.609	203.555	116.484	77.2924	146.33	199.904	322.832	306.029	212.662	275.767	133.252	101.305	84.9308	198.765	196.478	228.911	89.005	76.8502	84.8603	166.179	199.591	198.86	148.211	145.498	105.695	57.9636	166.202	87.6893	65.3554	44.1658	81.1838	100.856	233.416	67.4858	61.6995	207.628	123.084	92.0167	73.0742	88.0437	79.6125	70.6388	130.628	163.422	134.241
hsa-miR-34a-3p	MIMAT0004557	0.737021	0	1.77905	2.03222	1.11232	0	0.5294	0.62534	0	1.74504	1.43138	0.705346	1.82627	1.04923	0.527632	1.09353	1.73847	2.03956	1.23736	0.51898	0	0.132594	1.21966	0	1.85504	0.366858	1.14116	0.334832	0	1.21094	0	0.901454	0	0.877664	1.13962	0.668813	0	0	2.17411	1.24799	0.893366	0	0	1.18042	0	1.4046	0.987448	1.20288
hsa-miR-181a-5p	MIMAT0000256	423.787	621.382	1888.76	1092.2	1254.14	1044.18	791.453	628.467	936.602	2337.65	2433.06	1611.01	3408.28	932.761	987.2	1229.49	1126.53	1207.42	952.764	1751.82	472.08	3793.39	1975.55	2488.03	2211.57	1390.76	1550.84	1587.44	977.356	1161.9	1236.15	1710.51	1191.61	1745.89	794.313	1853.28	896.829	1767.18	809.313	850.197	1539.27	1144.02	1211.09	672.706	767.897	1236.05	3430.64	1926.53
hsa-miR-181a-2-3p	MIMAT0004558	581.509	705.895	874.107	924.886	808.102	841.672	794.1	450.245	566.262	667.303	1058.65	862.637	1570.37	711.375	566.149	975.428	636.859	1148.27	1070.31	607.985	887.533	4583.12	525.369	1388.28	1080.37	950.529	541.624	224.337	1696.55	1327.19	546.223	702.232	1456.82	1789.99	574.937	1090.83	351.251	1480.79	1357.73	667.522	798.223	884.198	1336.96	689.232	1309.46	1031.33	1355.52	918.76
hsa-miR-181b-5p	MIMAT0000257	121.608	119.184	323.194	219.028	255	198.919	140.82	103.181	137.782	463.482	434.28	434.14	667.731	195.156	205.777	385.651	365.658	256.985	223.961	313.723	118.453	939.43	270.155	782.345	608.637	270.191	244.637	246.994	230.963	260.05	354.62	266.83	533.67	531.644	336.757	566.484	182.13	965.084	170.668	208.727	374.321	345.885	371.088	352.551	213.358	377.838	801.56	357.256
hsa-miR-181b-3p	MIMAT0022692	28.0068	17.3359	42.1042	22.5802	27.808	21.5048	33.3522	23.1376	32.6536	78.8758	15.4589	55.3696	32.4163	31.4768	24.2711	35.722	35.9283	27.874	35.8833	15.5694	15.6012	39.2479	9.45237	21.4976	36.7297	20.7275	9.27194	8.14758	8.47161	33.3009	52.9226	33.8045	41.3513	28.7434	27.3508	45.4793	19.514	14.3966	25.5458	21.6839	27.6944	17.0507	80.2176	30.9531	20.6631	24.9317	38.7573	25.0199
hsa-miR-181c-5p	MIMAT0000258	42.7472	29.796	34.395	20.0964	26.4176	25.6862	20.6466	36.8951	23.0965	29.3167	49.2394	69.1239	63.4629	36.7229	40.6277	21.8706	20.2821	12.9172	7.42414	57.6067	7.51168	101.302	37.8095	53.7441	70.8624	35.4018	52.3508	37.836	64.2059	28.7599	17.7696	33.8045	47.6298	45.6384	27.9206	20.7332	12.1962	169.16	57.6139	35.5679	68.3425	37.3491	30.6523	6.55786	8.64965	7.72531	111.828	44.5066
hsa-miR-181c-3p	MIMAT0004559	89.9165	23.2951	24.3137	30.4833	22.5245	71.0852	16.9408	31.8924	29.4679	23.0345	45.2316	120.967	48.8528	30.4275	27.9645	39.367	19.7026	23.115	16.0856	34.5121	18.4903	215.466	38.4193	55.0086	56.9496	48.4253	56.6302	30.5813	46.8168	23.6134	30.9037	38.3118	137.693	78.7702	25.6414	15.3827	13.8224	240.628	116.315	41.1839	78.1696	43.3033	55.4349	15.3454	31.7154	19.6644	125.653	58.46
hsa-miR-182-5p	MIMAT0000259	29676.9	19780.8	34027.9	22556.5	12081.5	16312	18415.7	13030.8	22013.3	38908.4	27688.3	32261.4	10044.7	52280.8	48682.5	97664.5	46484.9	25652.9	69962.6	28173.1	60037.4	60531.8	14685.9	30306.6	33119.2	17819.6	5971.56	18992.3	111740	19575.5	58764.2	14403	169905	125317	8248.55	12992.4	12671.1	43845.8	23660.3	18887.9	28699.4	46845.7	13448.5	21739.6	49332.3	12006.9	13181.4	15838.6
hsa-miR-182-3p	MIMAT0000260	0	0	0.593017	0.225802	0.27808	0	0	0	0.79643	0	1.1451	0	0.456568	0	0	1.09353	0	0.679854	1.23736	0	1.15564	1.19335	0	0.421522	0.927519	0.550287	0.142645	0	1.33762	0	0	0.450727	0.432998	0	0	1.33763	0	0.514163	0	0	0	0.54129	0.652176	0.131157	0	0	0.246862	0.240576
hsa-miR-183-5p	MIMAT0000261	19211.2	15288.6	17278.7	20145.8	6215.1	12520.5	11481.6	6472.27	21690.8	20096.2	16703	23776.1	5731.98	51578.9	29064.1	76062.2	47310.6	20768.9	83102.1	11004.2	35820.9	46029.8	7856.14	22945.1	26097	13471.8	5435.5	10823	61858.8	9081.76	30941.6	9255.67	100178	68350.6	4969.87	6169.13	5369.59	20614.3	15733.5	9882.88	24580.5	27726	9765.03	16269.9	49226.1	5538.35	7313.03	9615.11
hsa-miR-183-3p	MIMAT0004560	7.37021	2.16698	2.96508	3.38703	1.3904	2.38942	0.5294	1.25068	2.38929	4.1881	3.72159	4.23207	1.3697	3.14768	2.63816	6.92569	9.27182	1.35971	9.89885	1.55694	4.62257	10.7401	2.43932	8.85196	15.0258	3.66858	1.5691	2.00899	4.90462	1.51368	3.09037	0.450727	6.27847	8.77662	1.13962	0.668813	0	1.54249	2.17411	0.779995	2.6801	10.2845	5.21741	0.9181	2.88322	0.7023	1.97489	1.92461
hsa-miR-187-5p	MIMAT0004561	0	0	0	0	0.834241	0	0	0	1.59286	0.349008	0.286276	0	0	0	0	0	0.579489	0	0	0	0	0	0	0	0	1.10057	0	0.111611	0	0	0	0	0	0	0	0	0	0	0.543528	0.155999	0	0	0	0	1.92214	0	0	0
hsa-miR-187-3p	MIMAT0000262	37.5881	2.70873	4.74413	57.5795	230.529	173.83	59.8222	53.1539	202.293	40.1359	144.569	9.87484	7.53337	15.7384	14.7737	28.4318	243.965	16.9963	306.864	5.44929	25.4241	15.2483	6.40322	30.9819	30.4226	153.713	7.41756	13.3933	4.45874	11.8067	0	61.7495	8.22696	5.04656	31.9093	8.02575	69.1119	4.62747	81.5291	4.83598	19.6541	21.9223	78.9133	5.77092	128.784	2.8092	7.40585	21.1707
hsa-miR-196a-3p	MIMAT0004562	0	0	0	0	0	0	0	0	0	0	0	0	0	0	0	0	1.15898	0	0	0	0	0.397783	0	0	0	0.550287	0	0	0	0	0	0	0	0	0.569809	0	0	0	0	0	0	0	0	0.393472	0	0	0.740585	0
hsa-miR-199b-5p	MIMAT0000263	117.186	208.572	263.892	382.057	531.134	537.022	213.878	241.381	216.629	176.598	322.06	159.761	253.852	100.726	108.165	102.063	428.242	654.02	262.319	327.736	108.053	69.2142	373.521	186.945	201.642	270.007	353.475	118.865	57.5178	329.679	67.9882	271.788	48.4958	86.6691	82.6223	14.0451	43.0933	28.7931	108.162	102.18	347.966	181.062	210.001	52.0694	80.2496	129.223	294.753	212.188
hsa-miR-199b-3p	MIMAT0004563	3770.6	5234.35	4415.6	7658.08	7365.79	6867.78	3979.5	3272.41	5140.96	3544.52	2172.26	3437.15	3258.53	3526.45	3916.09	1808.33	5897.46	8262.27	2982.03	8340.52	1557.23	1536.37	3355.29	2351.67	3021.48	5462.7	4513.73	1531.97	630.912	4573.42	1442.82	8141.47	791.954	1659.22	3551.05	1010.58	1099.29	800.552	2167.04	1543.46	7526.17	5939.58	28243.8	1083.36	1064.39	2602.73	4668.89	2355
hsa-miR-203a	MIMAT0000264	175118	54868	94146.7	25182.6	19708.1	28364.8	78699	8671.6	90274.6	9066.53	68309.1	15495.4	81568.6	48650.5	8397.26	8522.97	1342.1	63084.3	14021.7	2556.75	181312	3195.79	23528.8	5692.02	37911.7	24297	21147.9	126139	215753	54832.6	24911.5	40455	5037.72	3333.8	282209	7874.6	6931.52	3773.96	83383.1	21558.8	85048.9	33336.2	17500.5	15046.4	29566.4	181512	2441.96	3877.13
hsa-miR-204-5p	MIMAT0000265	0.737021	8.66793	2.37207	3.83864	18.0752	3.58413	1.5882	6.2534	2.38929	3.14107	8.302	0.705345	100.902	1.04923	47.4869	150.907	45.2002	33.9927	593.931	5.70878	36.9806	0.397782	32.6259	274.2	6.49262	126.566	4.56465	1.56255	8.47161	10.293	0.772592	1.35218	92.0121	0	0.569809	0	2.43925	0	230.456	11.544	68.3425	28.4178	20.2174	0.131157	16.3382	0.7023	2.46862	3.12749
hsa-miR-204-3p	MIMAT0022693	0	0	0	0	0	0	0	0.62534	0	0	0	0	2.73941	0	0	1.09353	0	0	3.71207	0	0.577821	0	0	3.37218	0	2.38458	0	0	0	0.302735	0	0	1.08249	0	0	0	0	0	4.34822	0	0.446683	0.270645	0	0	0.480536	0	0	0
hsa-miR-205-5p	MIMAT0000266	6948.63	11201.7	4799.28	20658.2	21690.3	45292.6	8905.57	9438.26	14601	333.303	19168.5	13010.1	15184.3	8156.68	10551.6	22004	20569.5	41664.2	59795.2	12945.4	24279.5	309.077	19179.5	18911.2	1295.37	20947.8	11097.9	7253.02	20816.1	8457.52	26357.8	3772.58	15401.1	28367.1	11319.8	1904.78	57.7288	2493.18	206.54	4718.67	3534.6	9325.63	8963.5	12269.6	23975.9	43592.5	10959.7	22396.2
hsa-miR-205-3p	MIMAT0009197	9.58127	7.0427	4.15112	8.80628	5.56161	15.5312	11.6468	4.37738	3.18572	0	4.86669	7.05345	8.21822	4.1969	6.33158	9.47725	5.79489	9.51796	12.3736	5.96827	10.9786	0.397782	6.40322	15.3856	1.29852	11.3726	10.1278	4.35282	10.701	2.72462	8.88481	3.60582	3.03099	11.1902	9.68675	1.33763	0	6.68412	0.543528	1.55999	4.91351	5.9542	12.3913	3.54125	3.84429	9.83221	5.18409	14.9157
hsa-miR-210-5p	MIMAT0026475	1.47404	1.08349	0.593017	0.677406	0.556161	1.19471	0.5294	1.25068	1.59286	0	1.43138	0.352673	2.28284	1.04923	0.527632	1.09353	1.73847	3.39927	2.47471	1.03796	1.15564	4.5082	1.52458	1.47533	1.85504	6.9703	2.42497	1.33933	0.891748	0	0	0.450727	2.81449	0.877663	0.569809	0.668813	0	1.54249	1.63058	0.935995	0.893366	2.9771	1.30435	1.31157	3.84429	1.05345	1.72803	1.92461
hsa-miR-210-3p	MIMAT0000267	3595.19	3339.32	1522.87	6813.13	2806.39	6723.82	3810.62	3069.17	3840.39	1081.58	1897.44	1479.11	4146.78	5614.41	3157.35	5229.26	4551.31	11613.9	13737.1	3296.04	5628.56	4090.93	1955.73	4404.9	2392.07	4737.05	2316.56	1253.83	2285.11	1000.54	867.235	1386.43	1769.01	721.658	2982.95	2443.17	1428.58	6504.16	1967.03	402.167	2093.16	11296.2	4445.88	1004.01	1617.97	1952.05	1207.15	1768.23
hsa-miR-211-5p	MIMAT0000268	0	0	1.18603	0.677406	0.27808	0.597354	0	0.62534	0	0.698016	0	0	0.684852	0	0	0	0	0	0	5.96826	0.577821	0	0	0	0.556511	0	0.285291	0.111611	0	0	0.772593	0	1.08249	0.219416	0	0	0.813082	0	0	0.311999	0.446683	0.270645	0	0.262315	0	0	1.23431	0
hsa-miR-212-5p	MIMAT0022695	0	0	0.593017	0.451604	0	0	1.0588	1.25068	1.59286	0	0.572552	0.352673	0.684852	0	0.527632	0	0.579489	0	0	0	0	0	0	0.843044	1.85504	0	0.142645	0.223222	0	0.302735	0	1.35218	0.216499	0.219416	0	0.668813	0	0.514163	1.63058	0.155999	0.893366	0	0.652176	0.131157	0.480536	0	0	0.721728
hsa-miR-212-3p	MIMAT0000269	3.6851	2.70873	10.6743	4.74184	7.78625	1.79206	7.4116	5.62806	11.15	11.5173	6.87062	3.17405	8.90307	1.04923	3.16579	1.45804	2.89744	0.679854	6.18678	3.63286	1.15564	2.51929	2.74424	9.48424	45.6339	4.4023	4.27936	6.36181	0.891748	5.44923	10.43	4.50727	10.6085	15.1397	5.69809	12.7074	9.75698	1.54249	4.34822	12.636	6.25356	2.70645	3.26088	3.93472	6.24697	5.26726	7.89957	5.0521
hsa-miR-181a-3p	MIMAT0000270	112.027	153.314	243.73	143.159	206.336	207.282	172.055	128.82	186.365	334.699	403.935	273.674	552.676	137.449	102.888	147.991	259.611	148.208	134.872	115.213	56.0487	500.676	207.342	257.971	321.292	212.961	213.255	223.891	39.6828	271.856	244.526	242.04	178.612	184.309	168.094	248.129	200.831	232.402	189.148	132.912	156.339	87.1478	383.479	80.2683	145.122	239.133	794.154	277.144
hsa-miR-214-5p	MIMAT0004564	35.377	16.2524	24.9067	75.1921	43.9367	62.1249	13.235	16.8842	31.8572	19.5444	21.1844	17.281	22.6001	5.24613	12.1355	13.4869	37.0873	78.8631	27.2218	39.7019	8.0895	7.42528	34.7603	32.0357	59.1756	39.6207	26.1041	9.82174	3.56699	28.7599	11.2026	21.6349	5.84548	12.7261	13.1056	5.3505	4.06541	4.62747	18.4799	10.452	24.5676	23.2755	392.61	6.68902	7.20805	28.7943	26.4142	24.2982
hsa-miR-214-3p	MIMAT0000271	2.94808	1.62524	5.33715	19.419	12.7917	7.16825	1.5882	1.87602	2.38929	5.58413	7.44317	2.11604	5.93538	3.14768	1.05526	1.09353	6.37438	6.79854	1.23736	9.34163	0.577821	2.12151	8.53763	12.0134	13.3563	8.62116	13.1234	5.46892	0.891748	4.54103	1.54519	3.15509	2.16499	7.89896	1.70943	0.668813	1.62616	1.54249	6.52233	5.30398	3.12678	2.16516	60.6523	4.59051	8.64965	9.12991	5.92468	2.64634
hsa-miR-215-5p	MIMAT0000272	11.7923	3.79222	0.593017	2.03222	2.50272	4.18148	3.1764	6.2534	6.37144	5.23512	1.71765	3.8794	2.73941	7.34458	4.22106	8.74823	4.05642	2.03956	0	3.37337	6.35603	2.3867	1.82949	4.00446	4.45209	1.10057	3.70878	3.79476	4.90462	4.84377	4.63556	2.25363	2.16499	3.29123	12.5358	9.36338	23.5794	2.57082	4.34822	5.92798	5.80688	14.0736	8.47829	1.70504	1.44161	2.1069	2.71548	1.68403
hsa-miR-215-3p	MIMAT0026476	0	0	0	0.225802	0	0	0	0	0	0	0	0	0	0	0	0	0	0	0	0	0.577821	0	0	0	0	0	0	0	0	0	0	0	0	0	0	0	0	0	0	0	0	0.270645	0	0	0	0	0	0.240576
hsa-miR-216a-5p	MIMAT0000273	0.737021	0	0	0.225802	0.27808	0.597354	1.0588	0.62534	0	0.349008	0.572552	0.352673	0.456568	0	0	0	0	0	0	0	0	0.132594	0	0.210761	0.371008	0	0.427936	0.111611	0	0	1.54519	0	0.649497	0.219416	0	1.33763	0	0	0	1.24799	0.893366	0.54129	0	0.131157	0	0	1.23431	0.481152
hsa-miR-216a-3p	MIMAT0022844	0.737021	0	0.593017	0	0.27808	2.98677	0	0	0	0.349008	0.572552	0.352673	0.228284	0	0	0	0	0	2.47471	0.25949	0	0.132594	0	0	0	0	0.142645	0.111611	0	0.302735	0	0.450727	0.216499	0	0	0	0	0	0.543528	0	1.34005	0	0	0.131157	0	0	0	0
hsa-miR-217	MIMAT0000274	9.58127	15.7106	16.0115	8.80628	25.8615	64.5143	14.8232	37.5204	16.725	24.7796	26.3374	12.6962	14.6102	23.083	13.7184	9.47725	28.9745	2.71942	8.66149	31.6578	6.93386	3.31486	5.48847	13.4887	9.83169	1.46743	15.4057	3.57154	3.12112	17.8614	20.0874	31.5509	39.8358	10.7514	1.70943	14.7139	3.25233	1.02833	16.3058	15.1319	35.7347	26.7939	3.26088	14.6896	3.84429	1.05345	31.1046	41.1385
hsa-miR-218-5p	MIMAT0000275	38.3251	69.8852	58.1156	34.7735	94.5473	105.732	64.5868	31.8924	60.5287	59.6803	65.2709	36.3253	73.2792	39.8706	51.7079	164.029	132.703	72.7444	108.887	55.7903	47.3813	124.241	45.7373	221.931	51.57	27.3309	69.4683	40.4031	21.8478	63.8771	46.3556	37.4103	78.3727	37.9589	24.5018	3.34406	15.4485	7.71244	207.084	46.0198	55.8354	49.5281	87.3916	19.0178	29.7933	23.8782	40.2385	38.9733
hsa-miR-218-1-3p	MIMAT0004565	0	0.541746	1.77905	1.12901	0.27808	0.597354	1.0588	0	0	2.09405	1.1451	0.705346	2.28284	1.04923	0.527632	0.36451	1.73847	0	0	1.29745	0	1.45853	0.304915	1.89685	0.742016	0.366858	1.14116	0.334833	0	0.908206	0.386296	0.450727	0.432998	1.31649	1.13962	0.668813	0	0	3.26117	1.55999	0.446683	0.270645	1.30435	0.786944	0.961073	0.35115	0.246862	0.721728
hsa-miR-218-2-3p	MIMAT0004566	0	0	0	0	0	0	0	0	0	0	0	0	0	0	0	0	0	0	0	0	0	0	0	0	0	0	0	0	0	0	0	0	0	0	0	0	0	0	0.543528	0	0	0	0	0	0	0	0	0
hsa-miR-219a-5p	MIMAT0000276	5.15915	3.25047	0	2.93543	0.55616	4.77884	1.0588	1.25068	0	1.39603	0.286276	3.17405	0.684852	3.14768	4.22106	2.18706	1.15898	4.07912	4.94942	1.03796	2.31128	0.928159	0.914746	1.05381	0.556511	1.284	2.8529	0.558053	1.7835	1.21094	0	0	1.94849	1.53591	6.2679	3.34406	0	1.54249	2.17411	0.779997	0.893366	2.70645	1.30435	0.131157	0	0.35115	0.987447	1.20288
hsa-miR-219a-1-3p	MIMAT0004567	3.6851	7.0427	1.18603	3.16123	1.66848	4.18148	3.7058	0.62534	3.18572	1.04702	6.01179	5.64276	5.02225	14.6892	2.11053	2.91608	0.579489	5.43883	11.1362	1.55694	8.66732	4.5082	0.60983	1.68609	1.85504	3.48515	10.1278	1.78577	7.13399	1.21094	3.09037	2.70436	9.95896	5.04656	0.569809	0	3.25233	6.68412	3.26117	1.87199	4.02015	2.16516	3.26088	1.04926	6.24697	2.1069	8.88702	6.25498
hsa-miR-221-5p	MIMAT0004568	11.7923	3.79222	4.74414	2.48382	5.28353	2.38942	1.0588	1.25068	0.79643	2.44306	3.14903	6.70078	6.39195	5.24613	3.69342	1.82255	1.73847	2.71942	3.71207	4.93031	9.82296	1.19335	6.40322	2.31837	0.742016	3.66858	1.5691	0.669664	8.02573	6.35744	17.7696	3.15509	7.57747	16.2368	8.54713	5.3505	4.06541	2.57082	9.23997	21.5279	2.6801	15.9681	8.47829	3.54125	51.8979	31.6035	3.70292	2.16518
hsa-miR-221-3p	MIMAT0000278	214.473	153.314	228.311	168.674	300.327	125.444	149.291	183.85	150.525	188.464	459.759	392.172	485.332	193.057	160.4	177.152	132.703	249.506	262.319	160.624	378.473	73.192	601.293	551.14	308.863	474.347	273.594	391.53	872.13	190.723	175.379	345.257	138.992	378.931	388.61	192.618	195.14	94.0918	442.431	160.367	230.489	198.654	213.261	93.9086	340.22	468.435	354.74	214.113
hsa-miR-222-5p	MIMAT0004569	16.2145	11.3767	10.6743	7.22567	9.73282	13.1418	8.4704	11.2561	6.37144	8.02718	5.43924	28.2138	21.4587	27.2799	14.7737	12.0288	7.53336	10.1978	14.8483	9.34163	29.4689	2.91707	12.5015	18.3362	6.30712	14.4909	7.41755	7.58953	15.6056	6.35744	5.79444	10.8174	5.62898	7.24071	31.3395	6.01931	13.8224	4.62747	15.2188	4.21198	11.1671	15.9681	12.3913	2.36083	20.6631	8.07646	8.14644	12.7505
hsa-miR-222-3p	MIMAT0000279	137.086	89.9298	100.813	126.223	167.682	90.2005	78.8806	113.187	65.3073	79.5738	77.0082	193.97	99.9884	179.418	132.436	129.401	88.0823	140.05	209.113	153.358	306.245	13.9224	219.844	122.663	79.21	112.809	53.7773	83.2616	376.764	84.1604	61.0348	126.654	31.1759	98.0788	313.965	124.399	108.14	65.8128	169.037	42.2758	122.391	204.067	110.218	24.1329	92.7435	145.376	77.0208	83.2393
hsa-miR-223-5p	MIMAT0004570	6.63319	1.08349	2.37207	6.32246	13.0698	4.77883	6.8822	5.62806	9.55716	3.83909	2.00393	2.11604	3.88083	4.1969	3.16579	4.00961	2.31796	2.03956	7.42413	6.22776	2.88911	0.397782	0.914745	3.58294	2.41155	0.366858	0.713226	6.91986	1.33762	1.81641	5.79445	5.85945	3.03099	3.29123	15.3848	56.1803	6.50465	1.02833	3.26117	2.96399	4.91351	4.05968	10.4348	1.44273	9.61073	8.77876	0.987447	4.08979
hsa-miR-223-3p	MIMAT0000280	232.899	192.32	342.764	369.638	808.38	416.953	604.045	283.279	700.062	368.901	761.207	334.686	493.322	153.187	141.933	98.4176	362.181	104.018	200.452	145.314	130.01	61.2585	155.202	842.412	497.891	58.6973	184.868	1201.94	128.858	237.647	219.03	407.457	647.332	246.623	998.305	1350.33	195.14	38.0481	201.105	181.583	271.137	175.378	217.175	57.3157	480.536	665.079	172.309	633.918
hsa-miR-224-5p	MIMAT0000281	225.528	295.251	111.487	139.546	121.799	51.9698	80.9982	96.9278	46.9894	86.2049	293.433	126.61	103.184	151.088	172.536	358.678	144.872	318.852	1007.21	47.7461	402.164	40.4412	161.91	332.37	44.3353	202.506	225.094	181.814	204.656	83.2522	256.114	78.4264	8.65996	107.294	117.95	4.01288	9.75698	222.118	20.1105	121.368	62.5356	55.4823	39.7827	62.0374	175.396	143.972	59.7405	78.1872
hsa-miR-224-3p	MIMAT0009198	9.58127	9.75143	1.18603	7.45147	10.289	1.19471	3.1764	8.12942	2.38929	4.5371	14.6001	11.6382	6.62024	6.29535	4.74869	12.3933	4.63591	6.11869	33.4086	2.33541	15.0234	2.12151	2.13441	9.69501	1.29853	12.1063	8.84401	5.02248	14.7138	8.17385	5.79444	0.901453	0.216499	3.73007	9.11694	0	0.813082	35.9914	0.543528	2.65199	5.3602	1.08258	3.26088	2.09852	3.84429	4.56495	3.70293	4.08979
hsa-miR-200b-5p	MIMAT0004571	72.965	23.2951	16.6045	27.0963	15.5725	15.5312	12.1762	28.1403	15.1322	9.42321	26.9099	28.2138	18.7193	24.1322	16.3566	12.0288	28.395	54.3883	35.8833	9.86061	41.6031	29.8337	14.6359	17.9147	12.4287	38.7035	70.6094	13.5049	41.4663	5.1465	52.5363	7.21163	74.2592	83.8167	32.4791	3.34406	39.0279	68.3837	21.1976	18.0959	14.7405	46.2804	19.5653	8.26291	35.0792	20.7179	27.1548	28.6286
hsa-miR-200b-3p	MIMAT0000318	1270.62	628.425	517.704	847.21	548.931	351.842	360.521	702.883	416.533	356.337	1045.77	1138.07	521.172	723.966	371.981	470.218	643.233	1327.08	1154.45	372.887	1262.54	1160.33	593.67	348.599	262.673	957.866	1304.78	306.148	1969.43	398.097	725.078	271.337	1827.9	2740.28	1267.25	125.737	555.335	1272.55	961.5	333.371	502.965	1173.25	241.957	217.065	540.603	426.999	990.656	971.446
hsa-let-7g-5p	MIMAT0000414	636.786	309.879	446.542	509.41	653.767	569.876	365.286	522.159	367.951	521.767	267.095	336.802	449.263	546.646	657.957	551.868	556.889	491.534	496.18	521.575	492.304	227.797	578.424	502.454	475.26	328.705	563.877	415.527	622.886	498.605	689.153	278.549	338.821	707.396	540.748	751.077	333.363	376.881	429.93	861.117	517.259	521.534	448.697	437.672	567.994	776.745	356.962	403.206
hsa-let-7g-3p	MIMAT0004584	82.5463	62.8425	72.348	90.9983	110.398	99.7582	49.2342	91.2997	68.493	70.1506	27.1962	53.9589	55.0164	93.3811	70.7027	86.7533	111.262	74.1041	79.1908	90.5619	79.1615	45.8776	36.8947	42.363	40.6253	44.7567	32.3805	13.8397	129.749	64.1799	23.1778	49.5799	15.1549	13.6038	62.679	53.505	35.7756	37.0197	54.3528	22.6199	78.1696	72.2623	73.0437	17.8374	12.9745	28.7943	70.6024	55.0919
hsa-let-7i-5p	MIMAT0000415	361.14	508.699	523.041	531.087	604.547	542.995	446.814	579.065	495.38	475.349	502.7	422.149	525.281	621.141	465.899	659.034	491.407	628.185	480.094	1012.53	344.959	242.382	407.977	420.468	363.587	316.782	506.819	435.951	342.431	504.66	491.369	903.256	400.523	473.279	516.247	573.172	343.12	723.427	397.862	484.066	603.469	280.118	305.87	277.267	514.654	617.323	474.221	460.463
hsa-let-7i-3p	MIMAT0004585	96.5497	187.986	116.824	164.61	181.03	215.048	114.35	196.982	116.279	135.066	131.687	94.1636	204.086	137.449	174.119	93.679	159.939	225.712	128.685	181.643	84.9397	59.5348	113.428	122.452	151.371	121.613	86.7283	58.9304	70.894	135.928	167.653	101.413	222.994	131.211	112.822	151.152	39.841	43.1897	87.5079	379.235	130.431	88.2304	91.9568	83.9407	133.589	286.188	149.845	154.45
hsa-miR-1	MIMAT0000416	11.7923	5.9592	2.96508	11.9675	25.0272	2.98677	4.2352	13.1321	6.37144	9.77222	12.0236	5.99544	4.79396	10.4923	11.0803	10.2063	14.4872	2.03956	0	13.234	13.2899	0.92816	5.48847	1.47533	0.927518	0.733716	3.56613	1.22772	6.24224	6.66018	3.86296	15.3247	2.16499	7.46013	1.70943	2.67525	0.813082	0.514163	4.34822	17.6279	8.93366	37.3491	1.95653	1.70504	3.36375	1.4046	9.87447	4.57095
hsa-miR-15b-5p	MIMAT0000417	654.474	168.483	152.998	222.867	103.724	123.652	195.349	140.702	142.561	131.227	158.024	192.559	227.827	643.175	140.878	328.423	130.965	240.668	283.354	173.599	239.796	174.892	361.325	611.207	427.4	272.942	675.996	413.964	214.465	125.635	514.547	99.1598	288.377	392.754	221.086	288.927	230.915	499.766	408.733	225.107	256.843	408.404	163.044	446.984	197.02	228.248	158.732	246.831
hsa-miR-15b-3p	MIMAT0004586	164.356	57.4251	42.1042	54.4183	18.6314	22.6995	52.4106	62.534	64.5108	30.3637	24.0472	36.678	25.5678	142.695	48.0145	103.885	46.9386	57.1077	77.9534	44.3728	61.8269	59.6674	39.639	139.313	138.571	68.2356	68.6124	43.4166	130.195	37.5392	75.7141	24.3392	69.9292	99.8341	60.9695	48.1545	47.1587	76.6103	80.9856	31.8239	63.429	120.437	55.4349	160.012	44.2093	41.4358	48.3849	56.5354
hsa-miR-23b-5p	MIMAT0004587	1.47404	1.62524	0	1.12901	2.7808	0.597354	1.0588	1.87602	0	1.74504	1.1451	0.352673	1.14142	4.1969	1.05526	2.91608	0	2.71942	2.47471	1.03796	1.73346	0.795565	1.52458	2.31837	0.927519	2.20115	1.71174	0.669665	3.12112	0.908206	1.93148	0.450727	2.16499	1.09708	0.569809	0	0	2.05665	2.71764	0.155999	2.23341	5.14226	0	1.70504	1.92215	0.7023	0.987447	0.962304
hsa-miR-23b-3p	MIMAT0000418	2913.44	3449.3	2353.68	1749.06	1551.69	1603.9	2681.41	1615.88	2104.17	2845.81	1863.37	1925.24	2384.2	5900.84	1579.73	4262.21	1185.06	3318.37	2691.25	2102.13	2266.21	1244.13	1662.7	1978.41	1116.17	1726.43	1564.96	1147.02	8707.48	2150.33	1859.63	2448.8	2481.95	2036.18	655.85	806.588	1748.13	895.158	2140.96	1056.12	2623.82	7045.71	1844.35	1236.81	978.853	658.758	1855.66	1271.69
hsa-miR-27b-5p	MIMAT0004588	42.7472	31.4213	33.802	18.0642	25.3053	35.8413	71.469	25.0136	47.7858	20.2425	24.3334	22.9237	23.7415	111.218	24.2711	36.451	13.9077	53.0286	51.9689	31.6578	46.2257	14.1876	17.99	35.6186	12.0577	34.6681	41.6524	30.5813	81.595	27.2462	66.443	43.7205	27.9284	30.2793	8.54713	15.3827	25.2055	16.4532	41.8516	14.1959	41.9882	34.1013	30.6523	46.692	20.1825	7.72531	43.6945	33.9212
hsa-miR-27b-3p	MIMAT0000419	4299.78	1456.21	1436.88	1218.88	2067.25	2086.56	2074.72	1091.84	1760.11	1705.6	1645.8	1103.87	2430.08	1990.38	789.865	2319.38	1678.2	5000.33	2640.52	942.207	1429.53	1270.39	2670.14	5946.62	2691.1	4343.23	3973.24	1767.02	3574.13	1353.83	3437.27	1240.85	4295.99	2843.41	438.183	1087.49	686.241	419.557	1520.25	1401.19	1293.15	3901.08	2685.66	2258.79	1593.94	1301.71	1868.74	1859.89
hsa-miR-30b-5p	MIMAT0000420	412.732	165.774	401.472	437.153	477.186	221.021	284.288	335.808	254.858	477.094	444.873	335.744	398.356	202.501	104.999	367.061	398.109	276.021	430.6	176.194	162.368	160.439	451.275	621.745	949.036	291.836	332.364	575.465	303.64	307.882	379.729	196.517	320.635	442.122	393.168	338.419	141.476	146.022	335.9	173.471	317.145	292.838	406.958	225.066	207.592	273.897	203.661	219.646
hsa-miR-30b-3p	MIMAT0004589	4.42212	1.08349	2.96508	4.51604	2.7808	7.16825	2.647	3.1267	1.59286	2.44306	3.43531	2.11604	3.19598	5.24613	0.527632	5.10314	2.89744	1.35971	13.6109	0.77847	4.04475	1.59113	0.914745	1.47533	5.00859	1.46743	2.28232	1.33933	1.7835	0.605471	3.09037	1.35218	1.08249	4.60773	1.13962	0.668813	0	1.02833	2.71764	1.87199	1.78673	2.70645	0.652176	0.655787	4.80536	1.05345	2.46862	2.40576
hsa-miR-122-5p	MIMAT0000421	0	0.541746	1.18603	0	0	0	0	0	0	0	0	0	0	0	0	0.729019	0	0	0	0.25949	0	0	0	0	0.185504	0	0	50.8945	0	0.60547	0.772593	0	0	0	0	0	2502.66	0.514163	4.34822	0	0.893366	0	0	0	0	0	0	0
hsa-miR-122-3p	MIMAT0004590	0	0	0	0	0	0	0	0	0	0	0	0	0	0	0	0	0	0	0	0	0	0	0	0	0	0	0	0.892886	0	0	0	0	0	0	0	0	56.9157	0	0	0	0	0	0	0	0	0	0	0
hsa-miR-124-5p	MIMAT0004591	0	0	0	0	0	0	0	0	0	0	0	0	0	0	0	0	0	0	0	0	0	0	0	0	0	0	0	0	0	0	0	0	0	0	0	0	0	0	0	0	0	0	0	0	0	0	0	0
hsa-miR-124-3p	MIMAT0000422	0	0	0	0	0	0	0	0	0	0	0	0	0.228284	0	0	0	0	0	0	0	0	0	0	0.421522	0	0	0.142645	0.223222	0.445874	0	0	0	0.216499	2.41357	0	0.668813	0	0	3.26117	0	0	2.70645	0.652176	0	0	0	0.246862	0
hsa-miR-125b-5p	MIMAT0000423	189.414	253.537	357.589	1039.37	1172.94	881.695	184.761	507.776	250.875	422.3	837.07	422.149	1026.36	311.62	457.457	765.106	1159.56	668.976	935.441	1053.01	498.66	341.298	633.919	729.444	581.554	520.021	458.605	126.008	504.284	327.257	2109.56	337.143	375.193	645.521	224.505	110.354	656.157	87.9219	338.074	706.366	696.826	711.256	796.959	337.205	540.603	368.006	689.978	1148.99
hsa-miR-125b-1-3p	MIMAT0004592	0.737021	0	1.18603	1.80642	0.834241	2.98677	1.5882	0.62534	0.79643	1.04702	1.43138	0.705345	2.51112	1.04923	0.527632	1.09353	1.15898	0.679854	0	0.77847	0.577821	0.530377	0.914745	3.16141	3.15356	0.183429	0.57058	0.111611	0	1.21094	0.386296	0.450727	0.432998	0.877663	0.569809	0.668813	3.25233	1.02833	0.543528	0.779997	0.893366	1.35323	0.652176	0.655787	0.480536	1.4046	0.987447	0.721728
hsa-miR-128-1-5p	MIMAT0026477	8.10723	3.79222	7.70922	5.87085	5.28353	10.155	7.4116	8.75477	7.16787	7.32916	8.01572	6.34811	5.47882	43.0182	11.0803	6.56117	5.79489	7.47839	28.4592	11.1581	15.6012	12.4639	3.35407	13.0672	7.60564	8.43773	4.84994	3.01349	6.68811	4.54103	15.0656	3.15509	44.1658	23.9163	6.8377	7.35694	4.87849	15.939	14.6752	6.70798	12.0604	8.39001	15.6522	14.8208	24.9879	5.96956	17.0335	6.25498
hsa-miR-128-3p	MIMAT0000424	162.882	145.73	122.754	81.2888	61.7339	140.976	96.8802	109.435	172.029	78.8758	313.186	138.953	272.571	546.646	183.616	172.413	179.062	72.0645	332.849	127.15	247.307	548.808	223.503	376.419	239.671	237.541	405.113	135.942	178.796	87.4905	360.028	110.879	627.631	676.019	117.95	113.698	101.635	193.839	229.369	127.608	178.673	239.521	269.349	148.077	403.651	82.1692	428.552	123.656
hsa-miR-130a-5p	MIMAT0004593	2.94808	0.541746	1.18603	1.12901	2.7808	2.98677	1.0588	0.62534	2.38929	1.04702	0	2.46871	0.684852	0	1.05526	1.82255	2.31796	4.07912	4.94942	3.37337	1.15564	1.06075	2.13441	1.26457	0.927518	2.01772	1.28381	0.781275	1.33762	1.21094	1.54518	0.450727	0.865996	0.438831	12.5358	8.69457	0	1.02833	4.34822	0.311998	3.12678	3.51839	9.78264	0.262315	0.480536	1.4046	0.987447	2.16519
hsa-miR-130a-3p	MIMAT0000425	82.5463	72.5939	69.383	123.288	204.945	217.437	105.351	50.6526	87.6073	77.8288	72.4278	56.075	91.5419	44.0675	60.6777	94.408	125.17	116.935	69.2919	111.581	69.9164	85.6559	150.323	108.12	101.841	119.963	94.8591	96.6549	69.1105	109.893	81.5085	81.5815	77.7232	64.7276	351.572	187.268	61.7942	230.345	190.235	38.2199	192.074	137.217	165	62.2997	48.0536	103.238	106.644	45.4689
hsa-miR-132-5p	MIMAT0004594	3.6851	1.08349	8.30224	3.61283	3.33696	5.37619	5.8234	6.87874	3.98215	4.1881	2.86276	4.58474	8.21822	2.09845	1.5829	3.28059	2.31796	4.07912	11.1362	5.70878	1.73346	0.928159	1.82949	2.10761	5.93611	1.83429	2.71026	1.56255	2.67524	6.66017	2.70407	3.60581	1.08249	1.31649	2.84904	7.35694	5.69157	2.57082	4.89175	2.65199	4.46683	4.05968	3.91306	1.04926	2.88322	1.4046	2.71548	3.84922
hsa-miR-132-3p	MIMAT0000426	46.4323	46.5901	112.673	65.7084	76.194	61.5275	94.2332	92.5504	136.19	79.2248	178.064	64.8918	180.344	76.5935	94.9738	72.1729	66.0618	46.9099	115.074	67.2079	47.9592	65.5015	59.1536	121.609	203.683	65.4841	92.1489	72.2121	29.8736	75.9866	73.3963	102.766	109.332	143.717	43.8753	50.8298	113.831	44.7322	82.6162	105.768	87.5499	51.6933	33.9131	51.0202	125.42	109.91	107.879	149.398
hsa-miR-133a-5p	MIMAT0026478	0	0	0	0	0.55616	0	0	0.62534	0	0	0.286276	0	0.228284	0	0	0	0	0	0	0	0	0	0	0.210761	0	0	0	0	0	0.302735	0	0.450727	0	0	0	0	0	0	0	0.155999	0	0.54129	0	0	0	0	0	0
hsa-miR-133a-3p	MIMAT0000427	6.63319	2.70873	2.37207	4.06444	8.34241	5.37619	1.5882	4.37738	6.37144	4.18809	26.9099	2.11604	7.0768	2.09845	5.27632	8.01921	8.69234	0.679854	1.23736	8.82265	6.35604	0.397782	2.43932	2.10761	4.45209	2.01772	2.56761	0.669664	2.22937	3.02735	1.93148	4.50727	0.865996	4.38831	1.70943	2.67525	0	0.514163	6.52233	4.36798	2.6801	11.3671	0	2.62315	1.44161	0.35115	12.3431	2.40576
hsa-miR-135a-5p	MIMAT0000428	1.47404	0	0	0.451604	2.50272	0	1.0588	1.25068	0.79643	0	0.572552	2.11604	1.59799	0	0	1.09353	0	0.679854	0	2.07592	0	1.72372	0.304915	1.47533	0.371007	0	0.285291	0.334832	3.12112	0.605471	0	0.450727	1.29899	5.70481	0	0	2.43925	0.514163	58.1575	0.467998	1.34005	3.24775	0	0.262314	0	0	0	0.240576
hsa-miR-135a-3p	MIMAT0004595	0	0	0	0	0	0	0.5294	0	0	0	0	0	0	0	0	0	0	0	0	0	0	1.59113	0.304915	0.210761	0	0	0.142645	0	0	0	0	0	1.08249	14.0426	0	0	0	0	0	0	0	0	0	0	0	0	0	0
hsa-miR-137	MIMAT0000429	0	0	0.593017	0.225802	0	2.98677	0	0	1.59286	4.5371	0.572552	0.705346	0.228284	0	0	0	24.918	0.679854	0	0.25949	0	0.132594	0.60983	0	0.185504	0.550287	0.28529	1.0045	0	0	0.386296	5.40872	0.865996	0.438831	13.6754	96.9778	0.813082	0.514163	1.63058	0.467998	0.893366	1.89452	13.6957	0	0.961073	1.05345	0.740585	0.962304
hsa-miR-138-5p	MIMAT0000430	15.4774	5.41746	0.593017	10.6127	4.72736	4.18148	5.294	17.5095	0.79643	3.83909	4.86669	3.8794	10.2728	4.1969	3.16579	0.72902	3.47693	4.75898	12.3736	16.3479	1.15564	0.66297	3.9639	9.06272	5.56511	6.23659	3.56613	2.1206	0	3.63282	9.27111	1.80291	2.16499	2.19416	1.70943	0	0.813082	0.514163	4.34822	4.83598	4.02015	1.62387	3.26088	0.655785	0.480536	3.86265	8.14644	1.92461
hsa-miR-138-2-3p	MIMAT0004596	0	0	0	0.225802	0	0.597354	0	0	0	0	0	0	0	0	0	0.36451	0	0	1.23736	0	0	0	0	0	0	0	0	0	0	0	0	0	0	0.219416	0	0	0	0	0	0	0	0	0	0.131157	0	0	0	0
hsa-miR-140-5p	MIMAT0000431	46.4323	40.6309	64.0458	42.6766	59.7873	47.191	47.646	73.7902	39.0251	52.3512	30.9178	27.1558	32.4163	47.2151	35.3513	27.7027	75.9131	30.5934	27.2218	45.6702	36.9806	12.8616	23.4785	26.3451	25.043	25.8635	40.226	32.3671	24.969	43.8966	36.3119	37.4103	14.0724	20.1862	35.8979	49.4921	55.2895	32.9064	35.3293	34.4759	39.3081	51.6933	22.8262	11.8042	14.4161	42.8404	44.4351	24.5388
hsa-miR-140-3p	MIMAT0004597	374.407	510.325	598.354	438.282	700.207	452.795	380.109	784.177	439.629	652.645	1385	330.807	1459.88	612.748	465.372	438.141	579.489	331.089	371.207	569.58	586.489	498.554	943.713	680.758	440.014	562.577	1240.02	696.228	295.615	529.484	953.379	647.694	286.861	396.264	268.95	402.625	785.437	613.396	400.58	1183.72	594.982	525.323	226.305	238.575	500.238	480.023	1296.02	824.214
hsa-miR-141-5p	MIMAT0004598	1846.97	833.205	276.939	667.697	200.496	620.651	1061.98	674.742	814.748	324.926	490.677	1128.2	478.711	1170.94	442.683	1841.14	429.981	575.157	485.043	880.189	1263.12	1031.98	369.557	796.677	521.079	1363.98	1313.19	748.796	1407.18	532.511	3871.08	679.245	904.533	1690.6	965.826	1696.78	580.54	1230.39	282.091	548.338	639.204	1470.42	1209.13	849.112	819.795	1184.08	2046.98	4259.88
hsa-miR-141-3p	MIMAT0000432	3045.37	1289.9	541.424	1980.06	487.197	2130.76	1171.03	801.061	1926.56	597.152	517.3	2370.31	457.709	2040.74	921.246	6567.01	1093.5	1910.39	1611.04	1105.17	2401.43	1040.2	1137.94	1065.4	840.516	1126.44	1303.92	962.977	2566.45	1117.4	779.16	697.725	934.41	1022.48	2189.77	6438.66	871.623	2563.62	1002.81	342.887	836.638	6766.95	1191.53	367.503	556.461	976.901	644.062	2739.44
hsa-miR-142-5p	MIMAT0000433	404.624	174.442	253.218	109.514	174.913	123.652	182.114	278.276	270.786	215.687	68.1336	70.8872	144.504	203.55	188.365	76.1825	161.098	47.5898	58.1557	150.504	69.9164	31.2922	151.238	177.25	119.65	55.579	190.431	274.674	40.5746	132.901	97.733	118.09	66.0322	79.4284	284.904	667.475	208.962	24.6798	96.2044	196.559	143.385	179.979	269.349	29.9039	39.404	200.156	138.243	165.276
hsa-miR-142-3p	MIMAT0000434	6663.4	8676.06	13325.7	5374.77	9196.4	6953.8	6030.92	13770.6	10201.5	9985.81	1527	3365.91	4400.86	11817.4	8322.34	6394.96	8848.8	2440	3535.13	9010.26	4149.91	919.806	3658.07	2296.45	2055.75	1103.33	2170.78	2960.81	2062.61	7067.66	1650.64	5223.47	1103.93	913.208	7348.82	11055.5	11958.8	1784.15	4149.29	3031.69	8444.1	3648.03	5891.76	722.939	555.5	1826.33	6235.23	8043.66
hsa-miR-143-5p	MIMAT0004599	305.864	173.9	139.952	218.351	247.492	171.441	134.468	126.319	111.5	136.811	92.7534	156.234	130.122	100.726	126.632	200.845	152.406	222.312	124.973	209.927	121.342	46.2754	45.7373	75.0309	90.8967	63.4664	49.6406	15.2907	51.2755	167.11	12.3615	158.205	11.4745	14.4814	119.66	71.563	56.9157	52.4446	132.077	16.3799	159.019	264.691	404.349	12.5911	15.3772	16.5041	154.782	70.7294
hsa-miR-143-3p	MIMAT0000435	118525	51461	27332.7	38503.1	41600.6	30670	59044.5	39075	52069	58471.4	59181.5	58208.3	68777.4	36498.4	42194.7	28388	34582.2	25399.3	13580	44996.1	25206.9	31160.6	35288.1	59997.5	35062.8	47739.4	70489.7	24311.2	12783.7	46113.2	99932.2	71013.3	51754.5	95202.9	48017.8	43057.5	16439.7	9701.23	48805	171253	36658.8	62934.3	97314.4	45497.7	107188	67202.5	85074.9	33236.6
hsa-miR-144-5p	MIMAT0004600	91.3906	71.5105	97.8478	23.0318	89.2638	10.7524	29.117	48.7766	16.725	34.5518	15.4589	13.4016	23.5132	102.824	36.4066	89.3049	46.3591	185.6	21.035	36.3286	20.8016	9.67938	102.756	435.643	12.9852	107.489	130.378	73.4398	1102.65	78.4084	24.3367	134.767	10.6085	10.3125	73.5053	84.9392	99.1959	69.9262	66.3104	86.2677	91.1234	42.4913	65.8698	181.259	93.2241	82.5204	36.5355	30.5532
hsa-miR-144-3p	MIMAT0000436	14.7404	3.25048	6.52319	1.35481	14.7383	0.597354	2.1176	2.50136	2.38929	6.28214	0.572552	0	1.82627	4.1969	0.527632	5.10314	5.2154	18.3561	1.23736	1.29745	1.73346	1.85632	8.23271	103.273	5.93611	30.0824	19.2571	10.603	64.6518	6.66018	1.15889	10.3667	0.649497	0.438831	5.69809	9.36338	1.62616	3.08498	1.63058	8.57997	14.7405	7.03678	7.82611	11.8042	3.36375	11.2368	3.45606	5.29268
hsa-miR-145-5p	MIMAT0000437	1431.29	1157.71	1082.26	2821.62	3277.18	1948.57	1290.15	1590.87	1228.1	2072.41	2280.76	1266.8	2272.11	624.289	707.555	1256.1	1827.71	2621.52	1038.14	1722.75	1040.08	586.729	1496.22	1415.26	1693.65	1124.6	1370.96	463.966	711.169	1952.64	492.914	1382.83	488.422	885.122	529.922	486.227	263.438	540.385	1711.57	1234.74	1635.75	2185.19	1012.18	462.592	886.109	1111.74	2193.12	992.617
hsa-miR-145-3p	MIMAT0004601	41.2732	35.7552	30.2439	63.4504	65.0708	43.6069	34.9404	44.3992	37.4322	40.1359	28.3413	30.6825	34.4709	30.4275	43.7935	37.18	49.2566	62.5466	21.035	53.7144	27.1576	11.2705	30.4915	32.8787	39.5123	26.7806	32.0952	14.7326	15.6056	48.1349	12.7478	54.9886	14.7219	22.3804	17.0943	8.69457	10.5701	6.68412	31.5246	34.7879	48.6885	106.905	37.174	11.0172	19.2215	23.5271	42.2133	19.9678
hsa-miR-152-5p	MIMAT0026479	0	0.541746	0	1.80642	0	1.79206	0.5294	0	0	0	1.1451	0.705346	2.96769	1.04923	0.527632	0.72902	0.579489	0.679854	1.23736	0	2.31128	0.265188	1.52458	2.73989	0.556511	0.917145	0.57058	1.78577	0	0.60547	0	0	0.216499	0	2.27923	0.668813	0	0	0.543528	0.623997	1.34005	2.70645	0.652176	0.131157	0.961072	0	0.987447	0.721728
hsa-miR-152-3p	MIMAT0000438	670.689	859.209	443.577	485.023	209.673	570.473	473.284	267.02	350.429	225.459	489.245	327.28	669.557	475.299	446.904	620.396	315.822	816.505	965.138	250.927	354.204	79.8217	231.431	935.357	297.919	571.014	442.486	731.943	155.61	474.386	234.868	435.402	189.004	228.192	894.03	476.863	86.9997	132.14	181.538	493.582	578.008	2105.35	730.437	135.617	459.393	281.272	359.677	227.104
hsa-miR-153-3p	MIMAT0000439	1.47404	2.16698	1.77905	2.70962	1.11232	1.19471	2.1176	2.50136	0.79643	2.44306	0.572552	2.11604	0.228284	2.09845	0	0	4.05642	0.679854	0	3.11388	2.88911	0.265188	1.21966	0.843044	2.22605	2.38458	1.14116	0.781276	6.68811	0.908206	1.15889	0.450727	1.73199	7.24071	3.98866	3.34406	0	1.02833	2.17411	1.71599	2.6801	1.62387	0	0.262314	0.961072	2.8092	0.246862	1.20288
hsa-miR-153-5p	MIMAT0026480	15.4774	23.2951	16.6045	13.3223	13.3479	8.96032	23.823	30.6417	17.5215	23.0345	5.43924	19.7497	4.33739	32.526	7.91448	4.37412	20.8616	12.2374	11.1362	21.0187	21.9572	1.72372	7.31797	5.47979	5.75061	15.9583	5.56317	6.13859	97.2006	19.6778	13.1341	13.0711	7.14447	34.0094	29.0602	53.505	8.13082	4.1133	16.8494	15.9119	29.4811	7.03678	21.5218	2.88546	10.5718	7.72531	6.4184	6.25498
hsa-miR-191-5p	MIMAT0000440	437.053	272.498	652.911	661.6	670.452	545.385	354.169	433.361	696.876	481.631	330.362	333.628	314.347	1104.83	656.902	599.619	675.105	463.66	673.122	667.927	715.921	437.428	358.885	410.562	310.162	216.813	296.274	389.298	707.602	392.042	494.073	301.536	696.478	609.756	476.93	913.598	531.755	1209.83	952.804	345.383	447.577	911.263	352.827	275.824	318.596	781.31	432.008	376.983
hsa-miR-191-3p	MIMAT0001618	1.47404	1.62524	1.77905	6.99986	2.7808	4.18148	0.5294	3.1267	7.9643	3.83909	3.14904	3.17406	5.7071	18.8861	2.11053	4.37412	3.47693	0	9.89885	1.03796	8.66732	8.35344	0.304915	5.05826	2.78255	2.56801	1.99703	0.446443	3.12112	0.605471	3.47667	1.80291	5.41248	1.53591	1.70943	0.668813	0	3.59914	8.15292	0.623997	2.23342	4.05968	4.56523	4.32819	2.40268	5.96956	5.18409	2.88691
hsa-miR-9-5p	MIMAT0000441	1701.78	1617.65	2250.5	11755.9	1844.51	6664.09	16203.3	779.8	19990.4	10809.5	482.661	1573.63	2740.09	2500.3	16369.3	2997	16634.8	4823.56	4527.48	6986.76	16962.5	69071.3	25476.3	6711.68	23018.8	755.544	2599	3676.12	9681.71	427.159	1390.67	1561.32	7208.34	6497.77	15745.5	4449.61	469.148	59715.9	4376.48	2210.82	10535	2811.73	1948.7	43121.2	847.666	415.411	9797.2	9005.49
hsa-miR-9-3p	MIMAT0000442	0.737021	0.541746	3.5581	6.09666	0.55616	5.37619	10.588	1.25068	15.9286	22.3365	0.572552	1.41069	3.42426	3.14768	31.1303	1.82255	14.4872	1.35971	3.71207	8.30367	10.4008	102.098	30.7964	7.79816	57.8771	0.183429	2.99555	5.69215	6.24224	0.60547	2.70407	1.35218	14.7219	12.5067	25.6414	9.36338	1.62616	90.4927	5.9788	3.43199	11.1671	4.05968	5.21741	42.8884	1.92214	0	16.7866	7.93901
hsa-miR-125a-5p	MIMAT0000443	145.193	221.032	428.158	844.726	1170.16	1033.42	198.525	360.196	242.911	325.973	650.419	378.771	605.637	211.944	785.644	1084.78	1152.6	871.573	1222.51	1257.49	543.73	385.186	472.314	439.226	490.471	373.828	230.372	271.772	756.203	341.788	292.426	397.09	193.334	435.979	273.508	252.142	648.839	437.038	225.02	398.267	646.797	756.995	435.653	379.307	269.1	291.104	442.376	347.873
hsa-miR-125a-3p	MIMAT0004602	0.737021	1.08349	1.18603	1.80642	3.61504	2.38942	2.1176	1.87602	2.38929	3.83909	8.58827	7.05345	7.30509	2.09845	0.527632	3.6451	10.4308	4.75898	7.42413	2.07592	1.15564	6.23193	2.43932	11.5919	14.6548	6.42002	2.42497	5.13409	4.01287	6.66018	5.02185	0.901454	2.59799	16.4562	6.2679	6.01931	4.87849	6.68412	2.17411	5.14798	4.46683	2.9771	9.13046	7.86944	4.80536	8.07646	8.3933	1.44346
hsa-miR-125b-2-3p	MIMAT0004603	4.42212	5.9592	6.52319	15.8061	12.2355	8.36296	2.1176	27.515	1.59286	8.02718	20.8981	16.2229	35.1557	16.7876	4.22106	22.2351	16.8052	3.39927	7.42414	16.0884	19.6459	27.5796	17.3802	36.2509	9.64619	30.4492	8.70136	8.03597	55.2884	10.5957	528.067	8.56381	30.5264	75.479	23.932	5.3505	0.813082	3.08498	11.9576	32.7599	40.2015	14.3442	43.0436	29.2481	61.9892	6.32071	10.6151	105.132
hsa-miR-126-5p	MIMAT0000444	483.486	243.244	521.262	353.38	483.582	169.649	449.99	503.399	441.222	792.597	297.441	493.389	282.159	241.322	254.319	452.357	397.53	229.111	436.787	289.331	287.755	129.014	146.359	416.885	273.618	109.507	180.732	97.8826	440.078	336.642	220.575	263.675	76.2077	208.445	282.055	292.94	191.887	148.593	269.046	202.019	201.007	502.588	204.131	118.96	191.253	61.8025	232.05	236.968
hsa-miR-126-3p	MIMAT0000445	5957.34	3774.89	6806.65	4615.62	10375.5	2461.1	6566.68	8001.86	5401.39	7108.94	3717.86	6007.78	4088.57	3395.29	4015.81	5718.79	5444.88	2822.07	5559.44	4855.31	4114.67	1201.83	1369.07	4156.84	3644.96	1173.03	1675.8	1585.21	4983.98	6081.95	988.532	5189.22	706.004	1756.86	4633.68	5006.06	5721.65	7298.03	6938.13	1258.6	3553.81	3838.02	2242.18	1314.33	1080.25	1499.06	2402.7	2553.23
hsa-miR-127-5p	MIMAT0004604	198.996	262.747	347.508	970.723	452.437	894.24	245.642	332.056	394.233	258.615	195.24	239.112	258.189	143.744	151.43	145.075	593.976	524.847	264.794	343.046	143.877	59.8	133.553	93.7886	188.286	235.156	111.406	63.06	45.925	402.941	109.322	326.326	1493.19	118.265	951.581	32.7718	185.383	70.9545	188.604	85.6437	1171.65	126.662	1917.4	86.3015	66.7946	175.926	411.025	184.522
hsa-miR-127-3p	MIMAT0000446	246.165	295.251	292.357	1696.9	485.806	902.603	240.348	323.926	356.801	336.793	653.281	332.57	786.438	116.464	195.224	197.929	515.166	537.765	235.098	427.12	138.099	173.035	318.332	255.653	448.362	659.794	468.59	281.929	43.2498	445.324	471.282	453.431	6340.61	514.968	1759	52.8362	227.663	93.0635	284.808	441.634	1621.01	134.511	4428.93	222.574	373.857	618.727	1064.71	313.711
hsa-miR-129-2-3p	MIMAT0004605	0	0.541746	1.18603	0	0.27808	1.19471	0	0.62534	2.38929	0.349008	0.286276	0	0.456568	0	0.527632	0	0	0	0	2.07592	0	0.132594	0	0.421522	1.66953	0	0.998517	0.781275	0	0	89.6208	0	0.216499	0.219416	0	0	0.813082	0	0.543528	0.623998	0	0.541291	0	0	0.961072	0.702301	0	0.240576
hsa-miR-134-5p	MIMAT0000447	349.348	315.296	326.159	2050.28	384.307	930.678	283.758	593.448	332.111	326.322	235.319	311.41	310.238	196.205	213.691	125.756	536.607	561.559	256.133	330.849	124.232	54.0984	101.537	94.8424	234.291	246.345	110.978	108.374	52.6132	554.308	217.485	401.597	4931.85	244.648	3600.05	132.425	247.177	108.488	322.312	141.336	2093.6	123.685	7658.5	139.814	266.698	369.059	429.786	133.52
hsa-miR-134-3p	MIMAT0026481	0	1.62524	1.18603	6.32246	1.94656	2.98677	1.0588	0.62534	1.59286	0.698016	0.286276	0	0.684852	0	0.527632	1.09353	2.31796	5.43883	1.23736	2.07592	0.577821	0.265188	0.60983	0.421522	0.371007	1.284	0.28529	0	0.891748	0.605471	0	0	8.65996	1.09708	0.569809	0.668813	1.62616	0.514163	1.08706	0.467998	5.3602	0.811935	15.6522	0.786944	0.480536	1.4046	1.72803	0.481152
hsa-miR-136-5p	MIMAT0000448	31.6919	36.297	46.8483	149.481	68.1297	117.081	43.9402	35.6444	54.9537	20.2425	8.58827	25.7451	17.3496	20.9845	22.1605	27.3382	90.9798	78.8631	30.9339	69.8028	31.7802	7.42528	29.5768	15.8071	32.8341	43.6561	25.5335	9.15208	9.80923	53.8869	9.27111	41.4668	98.0741	6.80188	131.056	6.01931	19.514	2.57082	19.0235	7.17597	114.798	37.8904	368.479	6.55786	2.40268	10.8857	22.2175	28.6286
hsa-miR-136-3p	MIMAT0004606	15.4774	2.70873	5.33715	25.2898	16.4067	25.6862	10.588	4.37738	5.57501	6.28214	6.29807	5.99544	13.0122	2.09845	4.22106	3.6451	18.5437	14.9568	12.3736	11.4176	4.04475	3.58004	9.14746	7.16587	13.7273	16.692	15.691	4.24121	1.33762	8.77932	2.31778	6.7609	33.1244	2.8524	47.8639	2.67525	0.813082	0.514163	4.34822	2.96399	17.8673	8.11936	208.044	2.09852	0.961072	6.67186	18.7615	8.90132
hsa-miR-138-1-3p	MIMAT0004607	2.21106	0	0.593017	1.12901	0.27808	0.597354	0.5294	1.87602	2.38929	0.349008	0	0.705346	1.59799	0	0.527632	0	0.579489	0	1.23736	3.11388	0	0.265188	0.304915	2.10761	1.66953	1.10057	0.28529	0.334832	0	0.60547	2.70408	0	0.649497	0	0	0	0	0	0	0.623998	0	0.541291	0	0	0.480536	0.702301	0.246862	0.240576
hsa-miR-146a-5p	MIMAT0000449	127.505	112.683	431.123	170.932	209.116	266.42	245.112	268.271	218.222	407.292	126.534	63.1284	174.181	264.405	239.017	98.7821	107.205	122.374	131.16	598.902	121.92	29.9663	224.418	152.38	142.467	77.7739	204.125	510.396	35.6699	202.227	150.656	124.851	57.3723	129.894	245.588	413.995	454.513	78.6669	143.491	186.575	237.635	145.337	84.1307	32.3959	80.2496	152.75	120.222	121.732
hsa-miR-146a-3p	MIMAT0004608	0.737021	2.70873	10.0813	0	0	7.76561	0	0	0	0	0	0.705346	3.88083	6.29535	5.27632	3.28059	1.73847	4.07912	0	0	0	0.132594	2.43932	3.58294	0.742015	2.20115	0	4.91087	1.33762	0	0	3.15509	0	0	5.69809	0	17.8878	0	1.08706	2.02799	10.7204	3.24774	0	0	0	1.4046	0	0
hsa-miR-149-5p	MIMAT0000450	102.446	223.741	201.033	221.512	237.759	93.1873	316.581	36.8951	439.629	179.041	561.673	172.104	597.419	186.762	54.3461	579.935	47.5181	1312.8	1005.97	200.845	275.043	18.298	262.227	599.194	268.424	1179.63	81.3078	373.673	476.64	194.356	92.3248	33.8045	137.044	775.853	480.349	42.804	21.9532	15.4249	51.0916	40.7159	231.829	601.374	132.392	43.2819	166.746	122.2	44.1882	135.204
hsa-miR-149-3p	MIMAT0004609	0	0	0	0.677406	0.27808	0	0.5294	0	0	0	1.71766	0	2.51112	1.04923	0.527632	2.18706	0	3.39927	4.94942	0.77847	1.73346	0	2.13441	3.16141	0.742014	4.76915	1.42645	4.46443	0	0.302735	0	0.450727	0.865996	4.1689	0	0.668813	0	0	0	0.467998	1.78673	0.54129	0	0	3.36375	0.35115	0.246862	0.721728
hsa-miR-150-5p	MIMAT0000451	364.825	662.555	1811.67	552.538	2012.47	939.041	446.814	1538.34	896.78	1388	1003.11	205.961	3888.36	1576.99	1576.56	977.615	962.531	174.043	337.798	1361.28	704.942	279.111	1947.49	671.906	342.625	92.8151	997.376	1723.94	140.896	806.79	763.708	611.636	234.036	479.642	252.995	388.58	1405	190.754	544.071	1404.62	899.62	301.77	209.348	139.027	330.609	1448.5	2066.48	1979.22
hsa-miR-150-3p	MIMAT0004610	1.47404	0.541746	6.52319	2.48382	5.00545	4.18148	0.5294	2.50136	1.59286	3.14107	3.43531	0.352673	14.1536	4.1969	12.6632	4.00961	2.31796	0.679854	0	4.67082	2.31128	0.795565	2.74424	1.26457	0.556511	0.366858	1.71174	2.45544	0	1.21094	1.54519	1.80291	1.73199	2.19416	0.569809	0.668813	1.62616	0.514163	0	7.64397	2.6801	1.08258	0.652176	0.262314	0.480536	5.26726	6.66527	5.0521
hsa-miR-154-5p	MIMAT0000452	2.94808	5.9592	1.77905	24.1608	11.1232	18.518	2.647	2.50136	7.9643	2.79206	2.57648	4.58475	0.913136	5.24613	3.69342	3.6451	8.69234	14.9568	6.18678	8.56316	2.88911	1.45854	3.9639	1.47533	5.3796	6.05316	3.99407	1.22772	0.445874	6.35744	1.54519	2.70436	13.6394	1.31649	27.9206	1.33763	4.06541	0.514163	3.26117	0.623998	11.1671	4.05968	0	0.655786	0.480536	1.4046	4.69037	1.92461
hsa-miR-154-3p	MIMAT0000453	2.21106	0.541746	2.37207	9.03208	1.94656	7.16825	1.5882	5.62806	0.79643	1.39603	0.858827	2.82138	5.02225	2.09845	0	0	4.05642	2.03956	2.47471	1.81643	1.15564	0.530377	1.21966	1.05381	2.41155	1.284	2.28232	1.22772	0	2.42188	0.772592	3.60581	19.2684	1.09708	37.0376	0	0.813082	0	1.63058	0.155999	23.6742	1.89452	7.17393	0.393472	0.480536	0.702301	3.70293	0.481152
hsa-miR-184	MIMAT0000454	0	1.08349	0	0.451604	23.9149	41.2175	0.5294	3.1267	0.79643	0.698016	3.14903	2.82138	23.0567	2.09845	21.1053	1.82255	1.73847	0	2.47471	595.529	6.93386	0.397783	1.21966	2.52913	1.11302	2.38458	0.28529	0.334832	7.57986	11.2012	25.1093	5.85945	24.2479	93.9099	9.11694	2.67525	5.69157	2.05665	1355.56	1.092	0.893366	1.89452	0.652176	0.786943	4.80536	5.61841	2.71548	12.51
hsa-miR-185-5p	MIMAT0000455	170.989	62.3008	80.0573	73.3857	67.5735	57.9434	61.4104	50.6526	81.2359	43.975	107.353	47.2581	103.184	92.3318	78.0895	97.3241	90.4003	82.2623	108.887	65.1319	112.097	35.8004	125.93	134.255	64.1842	107.673	137.082	100.226	87.3913	50.5568	61.8074	62.2003	45.0318	80.5255	162.965	100.991	52.0372	60.1571	66.8539	52.7278	54.0487	145.066	90.6524	27.8053	91.3019	54.4283	60.4811	69.2859
hsa-miR-185-3p	MIMAT0004611	5.89617	7.0427	7.1162	6.77406	3.05888	1.79206	4.7646	2.50136	7.16787	2.44306	18.8942	5.99543	14.1536	16.7876	6.33158	9.11274	15.0667	7.47839	24.7471	5.44929	6.35603	10.4749	4.87864	17.4932	10.2027	16.8755	14.6925	5.69215	7.57986	3.63282	5.79444	8.56381	11.691	10.0931	5.12828	4.01288	3.25233	8.74077	9.7835	6.39598	7.59361	5.14226	7.82611	12.8534	17.2993	3.5115	13.0837	3.60864
hsa-miR-186-5p	MIMAT0000456	288.912	423.104	496.355	581.666	364.842	588.394	245.112	550.925	341.669	294.912	185.22	197.497	202.26	560.286	449.543	514.688	611.361	676.455	952.764	533.511	377.317	153.942	272.899	239.846	280.11	221.766	252.197	139.737	498.487	310.909	219.803	271.337	657.941	358.086	751.578	615.308	604.933	543.47	725.066	308.879	429.709	691.228	442.827	251.297	444.016	199.805	299.196	290.616
hsa-miR-186-3p	MIMAT0004612	0	1.08349	1.18603	0.451604	0.834241	2.98677	0.5294	0.62534	0	0	0	0.352673	0.228284	0	0.527632	0.72902	1.15898	0.679854	2.47471	0.25949	0.577821	0.530376	0	1.05381	0.371008	0.183429	0.142645	0.111611	0.445874	0.60547	0	0	0.216499	0.219416	1.13962	2.67525	0.813082	0.514163	1.08706	0.311999	0	3.24774	0	0.131157	0	0	0.493724	0.240576
hsa-miR-188-5p	MIMAT0000457	2.94808	0.541746	1.18603	4.06444	3.33697	4.18148	2.1176	0	1.59286	3.14107	2.00393	1.41069	2.28284	4.1969	0	2.91608	7.53336	4.07912	6.18678	1.03796	5.20039	3.44745	5.18356	7.37664	8.71867	2.75143	4.84994	3.57154	2.67524	0.60547	8.11222	0	2.16499	2.41357	4.55847	1.33763	5.69157	1.54249	2.71764	2.18399	0.446683	4.60097	5.21741	1.44273	1.92215	0.702301	1.48117	0.962304
hsa-miR-188-3p	MIMAT0004613	1.47404	0	2.37207	4.29024	3.33696	2.38942	1.0588	0.62534	3.18572	1.74504	1.1451	1.76336	1.82627	5.24613	1.05526	5.10314	4.05642	2.71942	8.66149	1.81643	9.24514	1.85632	3.35407	1.68609	1.85504	0.917145	0.713226	0.446443	0.445874	1.51368	1.15889	0.450727	0.432998	0.658247	1.70943	0	2.43925	0	2.71764	0.779997	0.446683	2.70645	0	0.655786	0.480536	1.05345	1.72803	0.721728
hsa-miR-190a-5p	MIMAT0000458	4.42212	1.08349	2.96509	2.03222	3.89312	4.18148	3.7058	1.25068	0.79643	0.349008	1.1451	2.11604	1.14142	2.09845	2.11053	4.73862	7.53336	14.2769	1.23736	2.07592	3.46693	3.18226	2.13441	4.00446	0.927518	3.11829	2.42497	1.67416	4.01287	2.72462	4.24926	0.450727	1.29899	1.97474	5.12828	4.68169	0.813082	1.54249	0.543528	0.623997	4.02015	8.66065	4.56523	1.96736	0.480536	1.4046	1.72803	0.481152
hsa-miR-190a-3p	MIMAT0026482	0	0	0	0.225802	0	0.597354	0.5294	0	0	0	0	0	0	0	0	0	0	0	0	0	0	0.530377	0	1.05381	0.185504	0.550287	0.142645	0.223222	0	0.302735	0	0	0	0.658247	0	0	0	0	0	0.311999	0	0.541291	0	0.131157	0	0	0	0.240576
hsa-miR-193a-5p	MIMAT0004614	59.6987	57.9668	126.906	163.932	165.18	219.826	118.056	104.432	126.632	84.1109	310.609	126.257	270.973	86.0365	144.044	82.7437	140.236	150.928	134.872	365.881	111.52	169.058	136.907	128.143	233.178	144.359	186.437	159.492	30.3194	88.096	351.53	132.964	114.095	232.58	89.46	162.521	67.4858	91.521	191.322	268.631	121.498	89.313	127.174	236.739	162.902	395.044	256.242	348.595
hsa-miR-193a-3p	MIMAT0000459	5.15914	4.33397	7.1162	8.80628	6.39585	19.7127	11.6468	10.6308	11.9465	8.02718	7.1569	19.0443	8.67479	8.3938	3.69342	4.73863	10.4308	10.8777	8.66149	21.5377	16.7568	5.43636	4.87864	11.8026	23.93	5.31944	12.4101	6.2502	0.891748	10.5957	5.79444	8.11308	3.03099	3.29123	13.1056	15.3827	8.9439	5.65579	18.4799	5.92798	5.3602	9.20194	11.087	7.73828	1.44161	6.32071	18.7615	14.9157
hsa-miR-194-5p	MIMAT0000460	102.446	102.39	151.812	60.0634	68.6859	129.626	52.94	114.437	160.879	89.695	119.377	222.184	118.479	417.592	90.2251	355.397	76.4926	123.733	92.8017	208.889	387.14	245.432	175.326	140.156	121.505	82.3596	194.426	367.422	334.852	79.0139	92.3248	134.767	87.8986	184.967	151.569	93.6338	3384.05	86.3794	222.846	90.4797	255.056	400.285	262.175	31.0843	109.562	69.5278	152.56	271.129
hsa-miR-195-5p	MIMAT0000461	30.9549	30.3378	33.802	42.6766	54.7818	32.2571	27.5288	35.0191	29.4679	27.5716	21.757	23.6291	22.1435	24.1322	31.1303	12.3933	37.6668	25.8345	9.89885	31.1388	13.2899	9.94457	25.003	28.6635	28.1965	9.72174	47.6435	16.63	12.4845	35.1173	45.1967	36.5089	29.0109	34.6677	14.2452	16.7203	3.25233	10.2833	22.8282	59.9038	33.9479	47.3629	45.0001	19.2801	24.9879	30.5501	32.8326	17.3215
hsa-miR-195-3p	MIMAT0004615	2.21106	1.62524	0.593017	3.61283	4.17121	4.18148	0	3.1267	3.98215	1.39603	7.72945	2.46871	4.3374	0	3.69342	1.45804	4.05642	2.03956	1.23736	4.15184	3.46693	0.795565	3.35407	3.37218	2.41155	1.65086	1.5691	1.45094	0	2.42188	3.09037	3.15509	2.38149	2.19416	0	0.668813	0.813082	0.514163	1.63058	3.27599	3.12678	2.9771	2.6087	2.22967	2.40268	4.56496	3.70293	2.40576
hsa-miR-206	MIMAT0000462	0	0	0	0	0	0	0	0.62534	0	0	0.286276	0	1.82627	0	0	0	0	0	0	0.25949	0	0	0	0	0	0.183429	0.285291	0.892886	0	0	0	0	0	0	0	0	0	0	0	0	0.446683	0	0	0	0.480536	0.35115	0	0.240576
hsa-miR-320a	MIMAT0000510	198.996	226.992	227.718	530.635	594.536	286.133	509.283	709.761	448.39	440.448	424.833	461.649	430.772	304.275	297.057	258.073	435.776	505.132	272.218	525.986	409.675	210.294	246.372	305.182	470.251	458.939	232.654	321.997	344.215	424.738	1076.22	243.843	363.069	1890.92	470.662	280.901	366.7	953.258	725.609	606.214	511.006	139.924	82.8263	1524.18	639.594	931.602	313.514	266.799
hsa-miR-200c-5p	MIMAT0004657	76.6502	40.0892	16.0115	118.095	13.0698	89.6032	50.293	34.3937	41.4144	17.7994	32.0629	65.5971	43.374	155.285	68.5922	301.814	36.5078	63.2264	86.6149	47.2271	130.01	71.0705	14.0261	62.1745	35.4312	71.5373	80.5946	28.7956	54.3967	15.7422	54.8541	40.1147	66.0322	74.1625	66.6676	94.9714	40.6541	94.606	23.3717	20.9039	44.2216	119.084	61.9567	43.6754	97.0683	63.9094	78.0083	227.344
hsa-miR-200c-3p	MIMAT0000617	10343.3	7414.33	4917.89	15177.5	4097.24	13967.9	7035.73	7479.07	7582.01	5258.5	10790.9	13327.9	8342.18	13482.5	13557	41034.7	7496.85	12599.1	13036.8	14932.1	19633.8	12272.9	6744.42	6860.48	5131.77	9355.98	8723.19	9258.22	22877.4	8028.54	14759.6	7184.58	18548.3	23848.5	12251.5	26863.5	12795.5	41585.5	8872.54	5418.48	6864.63	29821.9	3973.71	8676.71	20651.5	18766.5	10284.3	26697.9
hsa-miR-155-5p	MIMAT0000646	529.918	446.94	1257.79	629.762	516.395	698.307	454.755	1313.84	918.284	832.035	265.378	566.745	608.833	1203.46	975.592	335.349	628.166	273.981	309.339	1118.66	351.315	122.915	612.27	305.182	215.184	122.531	345.915	377.133	95.4171	634.836	1063.09	270.887	480.844	1025.55	867.249	738.369	1222.87	322.38	598.967	1421.93	523.959	184.309	415.436	566.337	348.389	628.208	471.999	749.876
hsa-miR-155-3p	MIMAT0004658	0	2.16698	1.77905	1.35481	0.556161	1.19471	1.5882	2.50136	1.59286	1.04702	0.286276	0.705345	1.59799	2.09845	5.27632	2.91608	2.89744	0	0	5.1898	1.73346	0.397783	0.304915	0.421522	0	0.550287	0.427936	0.334832	0.445874	0.302735	1.54519	0.450727	0.216499	1.09708	0	0	2.43925	0	0	0.155999	1.34005	1.62387	1.95653	0.393472	0	0	1.97489	3.36807
hsa-miR-128-2-5p	MIMAT0031095	0	0	0	0	0	0	0	0	0	0	0	0	0	0	0	0	0	0	0	0	0	0	0	0	0	0	0	0	0	0	0	0	0	0	0	0	0	0	0	0	0	0	0	0	0	0	0	0
hsa-miR-194-3p	MIMAT0004671	0	0.541746	0	1.12901	1.11232	2.38942	0	1.25068	0	0	2.29021	0.705345	2.51112	2.09845	0	4.00961	0.579489	0.679854	0	3.11388	2.31128	2.51929	0.304915	1.47533	1.29853	1.284	0.855872	2.79027	0	0.302735	0.386296	0.450727	1.29899	1.75533	0.569809	0	28.4579	0	2.71764	0.467998	3.12678	3.78904	0.652176	0.393472	0.961073	1.05345	0.987447	1.92461
hsa-miR-106b-5p	MIMAT0000680	624.257	318.005	213.486	317.704	171.854	400.227	476.46	158.211	374.322	255.823	189.228	517.371	207.282	420.739	154.069	589.412	425.345	333.808	252.421	262.604	389.452	916.889	281.132	649.987	419.052	336.592	642.617	526.579	721.424	177.1	383.206	151.444	730.251	697.083	325.931	510.973	493.54	931.663	705.499	175.343	323.399	770.798	602.61	379.569	220.086	205.072	476.937	483.317
hsa-miR-106b-3p	MIMAT0004672	305.127	212.364	373.008	426.766	166.848	620.054	409.226	165.09	248.486	228.949	593.163	292.013	468.439	519.367	161.455	598.525	658.3	233.19	497.417	338.375	184.325	2141.13	310.404	701.413	486.761	584.038	337.641	430.594	691.551	96.8753	1010.94	204.63	1833.31	1644.3	95.1581	165.866	100.009	352.202	329.378	399.203	519.493	328.293	296.74	1016.73	901.967	401.716	1039.78	710.421
hsa-miR-29c-5p	MIMAT0004673	12.5294	31.963	43.2902	33.4187	55.8942	33.4518	29.117	55.6553	35.0429	58.9823	26.9099	35.2673	34.6992	56.6582	49.5974	40.0961	34.7693	22.4352	74.2413	40.9994	38.1362	14.9831	22.5637	18.547	23.7445	24.5795	13.4087	10.8262	23.6313	47.8322	31.6763	33.8045	9.95896	11.629	20.5131	14.0451	29.2709	52.4446	42.9387	27.7679	39.3081	24.6287	16.9566	24.2641	8.16912	14.7483	39.251	19.9678
hsa-miR-29c-3p	MIMAT0000681	974.341	3211.47	1745.25	1373.33	1907.63	1587.17	2674.53	8318.9	1883.56	3003.91	2050.59	1408.93	3423.8	2198.13	2336.88	544.578	1483.49	549.322	468.958	1421.49	813.572	625.447	5613.18	2546.2	2683.87	1198.53	6879.78	1918.03	605.943	3336.14	3584.44	866.747	1395.77	925.056	333.908	711.617	900.081	577.405	931.606	10921.4	2445.59	922.089	1245	1321.93	570.397	907.022	5477.12	4685.94
hsa-miR-30c-1-3p	MIMAT0004674	2.21106	1.08349	0	3.38703	0.834241	1.19471	0.5294	0.62534	1.59286	1.39603	0.286276	0.705345	1.82627	2.09845	0	1.45804	1.73847	2.03956	0	1.29745	1.73346	2.38669	0.304915	0.843044	0.556512	1.65086	0.570581	0.223222	0.445874	0.908205	1.54519	1.35218	1.51549	2.19416	0.569809	0	0.813082	1.02833	1.08706	0.467997	1.34005	2.70645	1.95653	0.655786	0.961072	0.35115	2.22175	1.20288
hsa-miR-200a-5p	MIMAT0001620	1761.48	996.271	602.505	1119.53	456.052	376.333	484.93	1135.62	667.408	255.474	824.474	1236.47	453.829	1477.31	457.985	455.637	560.945	952.475	1033.19	494.588	1703.42	1147.74	425.967	398.76	246.534	1485.04	1957.81	387.177	1915.92	315.45	1662.62	500.757	1850.2	2818.61	751.008	91.6273	1143.19	1602.65	910.952	504.034	868.799	580.805	429.132	288.284	809.223	519.703	1272.32	1399.19
hsa-miR-200a-3p	MIMAT0000682	610.253	324.506	253.811	434.669	222.464	167.857	169.937	361.447	277.954	149.724	302.594	626.347	160.027	442.773	148.265	170.955	339.001	656.059	587.744	179.567	531.596	474.82	279.302	205.492	176.599	488.471	765.435	181.256	1131.18	175.889	169.97	117.64	516.783	774.317	582.914	103.666	291.083	533.187	574.509	91.5717	299.724	564.296	112.826	47.2166	76.8858	75.4973	351.531	451.802
hsa-miR-302a-5p	MIMAT0000683	0	0	0	0	0	0	0	0	0	0	0	0	0	0	0	0	0	0	0	0	0	0	0	0	0	0	0	0	0	0	0	0	0	0	0	0.668813	0	0	0	0	0	0	0	0.262315	0	0	0	0
hsa-miR-302a-3p	MIMAT0000684	0	0	0	0	0	0	0	0	0	0	0	0	0	0	0	0	0	0	0	0	0	0	0	0	0	0	0	0	0	0	0	0	0	0	0	0.668813	0	0	0	0	0	0	0	0	0	0	0	0
hsa-miR-219a-2-3p	MIMAT0004675	0	0	0.593017	0	0	0	0	0	0	0.349008	0	0	0	0	0	0	0	0	0	0	0	0	0	0	0	0	0	9.26369	0.445874	0	0	0.450727	0.432998	0	0	0	0	0	0	0	0	0	0	0	0	0	0.246862	0
hsa-miR-34b-5p	MIMAT0000685	18.4255	6.50095	3.5581	19.6448	46.7175	2.38942	18.529	1.25068	9.55716	67.0095	97.9063	13.7542	5.7071	2.09845	5.27632	28.4318	32.4514	3.39927	17.323	7.7847	89.5623	1.45854	1.21966	4.21522	0	15.0412	1.14116	13.0585	0.891748	66.9045	13.5204	6.31017	0	0.877664	14.2452	4.68169	1.62616	12.8541	2.71764	0.311998	28.5877	31.1242	0.652176	2.88546	0.961072	0	2.71548	2.88691
hsa-miR-34b-3p	MIMAT0004676	15.4774	5.9592	13.6394	15.8061	30.8669	1.19471	10.0586	1.87602	11.9465	45.371	91.8945	8.81682	11.1859	1.04923	17.4119	54.312	41.1437	2.03956	29.6965	4.41133	50.2705	3.04967	0.914745	8.00892	0.371008	22.1949	2.99555	18.5274	1.33762	40.2638	19.7011	7.21163	1.73199	2.41357	9.68675	2.00644	1.62616	5.65579	2.71764	2.18399	19.2074	44.6565	0	8.26291	5.2859	1.75575	1.72803	2.64634
hsa-miR-34c-5p	MIMAT0000686	98.7608	35.2135	29.0578	69.9987	198.827	24.4915	62.4692	13.1321	93.1823	274.32	443.441	92.0476	36.2972	5.24613	39.0448	234.38	168.631	16.9963	89.0896	26.9869	214.372	16.1765	3.65898	47.2105	2.22604	107.489	27.8158	107.146	2.67524	307.882	70.6922	62.651	3.46399	10.0931	91.7392	18.7268	10.5701	236.001	23.9152	6.08398	72.8094	151.832	20.2175	79.219	11.5329	8.77876	18.7615	15.6374
hsa-miR-34c-3p	MIMAT0004677	26.5327	18.4194	29.0578	33.1929	54.2257	5.97354	15.882	10.0054	30.2643	92.4871	372.159	18.6917	51.1356	5.24613	36.9342	105.343	68.9592	5.43883	38.358	16.0884	106.319	21.878	5.18356	30.5603	0.742015	121.98	31.382	143.308	3.56699	82.344	72.2374	32.4523	1.94849	3.07182	7.97732	10.0322	5.69157	76.6103	5.43528	4.21199	44.6683	97.1617	2.6087	14.5585	7.20805	2.45805	13.5774	11.7882
hsa-miR-299-5p	MIMAT0002890	2.94808	3.25047	2.37207	4.51604	1.3904	7.76561	3.7058	2.50136	0.79643	2.44306	3.72159	3.17405	5.25053	1.04923	0.527632	1.09353	2.89744	2.71942	2.47471	1.29745	0	0.265188	2.43932	1.05381	4.45209	4.76915	2.99555	2.90188	0	2.11915	1.93148	1.35218	12.3404	2.63299	10.2566	1.33763	0.813082	2.05665	2.17411	1.092	1.78673	0.811935	34.5653	0.918101	1.92214	3.5115	2.22176	1.20288
hsa-miR-299-3p	MIMAT0000687	1.47404	0	0.593017	2.48382	0.83424	0.597354	0	0	1.59286	0	0	0	0.228284	0	0	0	1.73847	1.35971	1.23736	0.51898	0.577821	0.132594	0.304915	0.632283	0.927519	0.733716	0.998517	0.446442	0	0	0	0.901453	2.59799	0.658247	10.2566	0	0	0	1.08706	0	1.34005	0	24.1305	0	0	0	1.72803	0
hsa-miR-301a-5p	MIMAT0022696	25.0587	10.8349	5.33715	27.0963	9.73281	20.3101	7.941	3.75204	18.3179	5.58413	1.71765	22.9237	5.02225	59.8059	8.44211	21.8706	22.0206	22.4352	50.7316	8.30367	19.6459	12.4639	3.35407	30.3496	10.0172	9.17145	17.5454	3.57154	14.268	6.96291	4.63556	6.7609	8.22696	5.70481	50.713	25.4149	5.69157	7.19828	23.3717	0.779997	23.6742	18.6745	24.7827	12.0665	3.84429	3.5115	11.3556	6.0144
hsa-miR-301a-3p	MIMAT0000688	37.5881	7.0427	13.0464	35.4509	15.0163	38.2307	10.0586	6.87875	15.9286	9.0742	4.86669	36.678	4.79396	45.1167	20.05	41.9186	27.236	25.1546	55.681	12.715	21.3794	17.2372	5.18356	34.1433	12.7997	13.0235	12.2675	8.14758	22.7396	6.96291	6.95333	4.05654	10.825	18.6503	58.6903	33.4406	10.5701	18.5099	50.0045	3.43199	23.2275	28.6884	21.5218	24.3953	6.72751	3.86266	10.8619	9.86362
hsa-miR-99b-5p	MIMAT0000689	11148.9	22325.3	26708.3	31865.2	40858.4	46151	15915.4	19290.5	16364.2	24681.8	27434.4	28224	22396.5	26918.9	44930	62145.3	112217	41785.9	74204.2	40318.7	25839.6	24104.2	14596.9	23099.6	28607.1	15142.8	5785.98	13276.9	46004.4	31789	20906.4	33762.1	19583.6	27291.6	23230.5	19366.1	71286.9	40197.3	21288.3	19202.9	40613.3	21966.7	38556	40086.3	20428.1	15734.4	25039.4	13620.9
hsa-miR-99b-3p	MIMAT0004678	30.2178	61.2173	53.3715	45.612	67.5735	63.3196	35.9992	37.5204	23.0965	53.7472	115.083	92.7529	92.2267	104.923	69.6474	98.0531	242.806	52.3488	157.144	90.5619	38.714	150.627	54.5798	126.035	121.876	58.147	22.8232	57.3679	109.239	62.6662	43.2652	66.7075	79.4552	90.838	101.996	117.711	123.588	96.6626	55.4398	98.2797	166.166	49.2575	140.218	156.339	48.5342	43.8938	154.782	38.011
hsa-miR-296-5p	MIMAT0000690	23.5847	3.25048	2.96508	18.9674	7.78625	15.5312	3.1764	0.62534	11.9465	5.58413	18.8942	3.17406	15.0667	8.3938	13.1908	3.28059	2.31796	7.47839	73.004	24.911	5.20039	10.3423	0.60983	12.0134	4.45209	2.56801	3.99407	1.0045	16.9432	5.1465	0.772592	2.70436	11.9075	10.9708	1.13962	24.0773	8.13082	7.71244	17.9364	4.83598	2.23342	4.60097	10.4348	4.72166	0.961073	2.45805	28.636	3.84922
hsa-miR-296-3p	MIMAT0004679	3.6851	0.541746	0.593017	4.06444	1.3904	1.19471	2.1176	0.62534	4.77858	1.04702	3.72159	0.705346	9.58793	17.8368	2.11053	1.09353	0	1.35971	21.035	3.11388	0.577821	9.67938	0	5.26903	0.371008	0.917145	1.71174	0.446443	4.90461	1.51368	0.386296	0	4.54648	7.89896	0	2.67525	0.813082	1.02833	4.34822	1.248	0.893366	0.54129	0.652176	0.9181	0.961073	0.35115	16.046	0
hsa-miR-130b-5p	MIMAT0004680	45.6953	44.9649	21.9416	42.6766	16.1287	54.3593	24.8818	18.7602	27.8751	17.4504	16.0314	29.2718	22.6001	71.3473	33.2408	139.243	85.7644	67.9854	89.0896	37.107	70.4942	19.6239	16.4654	29.085	10.5737	46.2241	30.3834	6.80825	42.8039	16.9532	23.1778	12.1696	33.7739	32.9123	19.3735	15.3827	46.3456	138.824	67.941	8.89197	52.7086	50.0694	61.9567	35.1502	21.6241	12.9926	25.6736	21.1707
hsa-miR-130b-3p	MIMAT0000691	53.8025	29.796	9.48827	26.4189	16.9629	70.4878	23.823	15.0082	19.1143	15.7054	14.0275	21.1604	17.3496	40.9198	15.829	64.8827	71.8566	53.0286	32.1713	11.9365	39.2918	13.1268	18.9047	43.8383	16.8808	46.4075	49.4979	17.7461	15.6056	10.8985	36.6982	9.46526	39.8358	73.5042	25.0716	23.4084	26.0186	169.674	34.7858	16.8479	21.8875	30.5829	47.6088	42.495	58.6254	22.1225	20.4895	24.2982
hsa-miR-30e-5p	MIMAT0000692	14625.4	12385.4	11565	14348.4	10516.4	10877.8	8207.29	18794.6	9049.04	8278.12	3697.25	9861.79	5686.78	16351.1	9292.13	9800.94	11628	8901.33	9658.8	13215	12180.5	8966.95	9017.26	4621.99	3594.32	3501.11	4949.22	2503.76	28606.4	11467.6	7344.65	7023.22	4441.26	4217.17	21875	16292.9	14312.7	8218.38	10325.9	9927.49	10128.5	13792.6	15975.7	5447.49	1882.74	2325.67	7884.76	10324.1
hsa-miR-30e-3p	MIMAT0000693	3990.23	5224.06	5972.86	5572.12	5897.25	4541.69	3696.27	7367.14	5388.65	4612.49	3868.44	7125.05	3244.6	7584.85	3734.58	3745.7	5790.26	3518.92	6924.24	4396.54	5640.69	9597.04	3549.21	3022.1	2955.26	4182.18	2576.6	2029.19	18218.4	6457.65	12395.5	5419.99	9764.54	13889.9	3200.05	3170.17	8865.03	5052.16	10621.1	9519.09	5262.38	2786.56	5217.41	15127.9	12757.8	5651.77	4637.3	5821.94
hsa-miR-26a-2-3p	MIMAT0004681	7.37021	4.87571	2.37207	7.45147	5.83969	16.1286	3.7058	2.50136	6.37144	5.58413	2.00393	6.70078	3.19598	0	1.05526	13.8514	8.11285	7.47839	7.42413	4.67082	9.24514	1.32594	4.26881	7.16587	6.30712	6.05316	3.85142	2.1206	3.12112	3.93556	3.86296	3.15509	2.59799	6.14364	8.54713	6.01931	4.06541	1.02833	1.63058	3.89999	3.57347	13.2616	9.13046	2.62315	2.40268	9.83221	3.70293	12.51
hsa-miR-361-5p	MIMAT0000703	715.647	113.767	134.615	197.125	151.554	207.282	131.291	135.699	159.286	155.308	325.209	226.063	277.593	210.894	87.5869	395.493	231.796	191.719	269.744	97.0492	160.056	354.424	172.887	320.989	200.715	276.794	169.32	120.651	220.708	157.12	310.969	142.88	357.007	365.327	95.1581	95.6402	196.766	417.5	414.168	184.235	185.374	129.098	180.653	201.195	897.642	234.217	229.088	164.554
hsa-miR-361-3p	MIMAT0004682	86.2314	69.8852	137.58	151.287	191.875	138.586	60.881	144.454	86.8109	96.6752	307.46	57.133	420.271	111.218	174.119	184.442	127.488	87.7012	122.498	177.232	131.165	133.92	180.205	129.407	134.861	92.0814	158.907	152.683	98.5382	84.4631	141.771	75.2713	129.466	170.266	43.3055	82.264	123.588	139.338	123.924	288.131	86.2099	54.941	35.8697	69.9068	154.252	97.2687	299.443	199.438
hsa-miR-362-5p	MIMAT0000705	2.21106	6.50095	7.1162	13.7739	16.6848	32.8545	7.4116	7.50408	7.16787	5.93313	8.302	13.7542	8.44651	15.7384	7.91448	14.2159	25.4975	14.2769	43.3075	6.48725	89.5623	7.29268	27.4424	10.7488	9.27518	6.9703	7.41756	7.47792	8.02573	8.47659	15.8382	7.21163	2.38149	11.8484	10.8264	2.67525	34.9625	29.8214	28.2634	2.18399	7.14693	13.8029	7.17394	1.96736	8.16912	4.2138	5.43096	6.73613
hsa-miR-362-3p	MIMAT0004683	2.21106	1.62524	0.593017	1.12901	2.7808	1.19471	3.1764	0.62534	2.38929	1.04702	2.57648	0.705346	1.3697	1.04923	0.527632	0.72902	3.47693	2.03956	3.71207	0.25949	2.31128	1.98891	4.26881	3.58294	2.59705	1.284	1.99703	2.90188	1.33762	1.81641	1.93148	1.35218	1.08249	1.53591	3.98866	4.68169	1.62616	1.02833	1.08706	2.49599	2.23341	3.78903	1.95653	1.44273	0.961072	2.1069	1.72803	2.64634
hsa-miR-363-5p	MIMAT0003385	0.737021	0	0	0	0	0	0	0	0	0	0	0	0	0	0	0	0	0	0	0.25949	0	0	0	0	0.185504	0	0.142645	0	0	0	0.386296	0	0	0	0	0	0	0	0	0	0	0	0	0	0	0	0	0
hsa-miR-363-3p	MIMAT0000707	20.6366	2.16698	8.89525	12.8707	4.44929	14.9339	4.7646	7.50408	27.8751	3.49008	1.1451	17.9863	3.42426	6.29535	9.49738	88.2114	33.0309	9.51796	2.47471	7.00622	32.358	22.1432	3.9639	11.1703	10.2027	13.7572	30.0982	13.6165	31.6571	3.93556	29.3585	7.66235	15.3714	3.51065	41.0262	6.01931	5.69157	1.02833	5.97881	9.67197	7.14693	6.49549	29.3479	27.9365	1.44161	4.56496	1.48117	12.9911
hsa-miR-365a-5p	MIMAT0009199	0.737021	1.62524	0	0.677406	0	1.19471	1.0588	2.50136	0.79643	1.04702	1.43138	0.705346	2.05456	0	2.63816	4.37412	0	1.35971	3.71207	0.51898	0	0.265188	1.21966	2.31837	2.41155	3.11829	0.427935	0.334832	0.445874	0.60547	0	0.901453	0	0.219416	2.84904	1.33763	2.43925	1.02833	1.63058	0.155999	0.893366	1.89452	0	1.04926	0.480536	1.4046	0.246862	0.481152
hsa-miR-365a-3p	MIMAT0000710	25.7957	48.2154	26.6858	46.9668	29.4765	82.4349	28.5876	43.1485	27.0786	23.0345	111.648	47.2581	39.2648	29.3783	41.1553	95.137	26.6565	89.0609	240.047	64.3535	21.9572	17.7676	51.5307	104.327	107.407	106.572	17.9733	25.0008	11.1469	41.4747	45.583	29.2972	43.9493	45.419	31.3395	65.5436	26.0186	24.1657	75.5503	123.396	36.628	41.1381	22.174	62.4309	80.7301	241.592	24.6862	30.072
hsa-miR-365b-5p	MIMAT0022833	0	0	0	0.451604	0	1.19471	0.5294	0	0	0	0.286276	0.705345	0	0	0	0	1.15898	0	0	1.55694	0	0	0.60983	0	0.556512	0.183429	0.28529	0	0	0.60547	0.386296	0.450727	0	0.658247	0	0.668813	0	0	0.543528	0.311998	0	0.811936	0	0.393471	0.480536	1.4046	0.493724	1.68403
hsa-miR-365b-3p	MIMAT0022834	25.7957	47.6736	26.6858	46.9668	29.4765	82.4349	28.5876	43.1485	27.0786	23.0345	111.648	47.2581	39.2648	29.3783	41.1553	95.137	26.6565	89.0609	240.047	64.094	21.9572	17.7676	51.8356	104.327	107.036	106.756	18.116	25.0008	11.1469	41.4747	45.583	29.2972	43.9493	45.419	31.3395	65.5436	26.0186	24.1657	75.5503	123.396	36.628	41.1381	22.174	62.4309	80.7301	241.592	24.1924	30.072
hsa-miR-302b-3p	MIMAT0000715	0	0	0	0	0	0	0	0	0	0	0	0	0	0	0	0	0	0	0	0	0	0	0	0	0	0	0	0	0	0	0	0	0	0	0	0.668813	0	0	0	0	0	0	0	0	0	0	0	0
hsa-miR-302c-3p	MIMAT0000717	0	0	0	0	0	0	0	0	0	0	0	0	0	0	0	0	0	0	0	0	0	0	0	0	0	0	0	0	0	0	0	0	0	0	0	0	0	0	0	0	0	0	0	0	0	0	0	0
hsa-miR-302d-3p	MIMAT0000718	0	0	0	0	0	0	0	0	0	0	0	0	0	0	0	0	0	0	0	0	0	0	0	0	0	0	0	0	0	0	0	0	0	0	0	0.668813	0	0	0	0	0	0	0	0	0	0	0	0
hsa-miR-367-3p	MIMAT0000719	0	0	0	0	0	0	0	0	0	0	0	0	0	0	0	0	0	0	0	0	0	0	0	0	0	0	0	0	0	0	0	0	0	0	0	0	0	0	0	0	0	0	0	0	0	0	0	0
hsa-miR-376c-5p	MIMAT0022861	0.737021	1.62524	0	4.74184	2.7808	2.38942	0	0	0.79643	1.04702	0	1.41069	0.456568	0	0	0	2.31796	1.35971	1.23736	1.03796	0	0.265188	0	0	1.66953	1.10057	0.28529	0.223221	0	1.21094	0.386296	0.450727	3.68048	0.219416	3.98866	0	0	0.514163	2.17411	0.311998	4.02015	0.54129	15	0.524629	0	1.75575	0.493724	0.240576
hsa-miR-376c-3p	MIMAT0000720	2.94808	4.87571	2.37207	24.1608	9.17665	17.9206	3.1764	11.8815	7.9643	3.49008	3.72159	4.23207	4.3374	0	3.69342	0.36451	10.4308	6.11869	3.71207	2.33541	1.73346	0.662971	2.43932	8.00892	11.6867	5.6863	7.5602	5.35731	2.22937	3.63282	4.24926	2.25363	49.5783	4.82714	30.7697	0.668813	1.62616	1.54249	2.17411	1.092	16.974	1.89452	82.1741	1.57389	4.32483	6.32071	4.69037	6.25498
hsa-miR-369-5p	MIMAT0001621	2.21106	1.62524	1.77905	16.2578	6.39585	7.76561	1.0588	2.50136	2.38929	3.49008	1.43138	1.05802	3.19598	0	0.527632	0.72902	10.4308	6.11869	0	3.11388	2.31128	0.265188	1.82949	2.10761	3.71007	2.38458	2.56762	2.79027	0.445874	5.44924	3.09037	1.35218	30.3099	6.14364	11.3962	0	0	0.514163	1.08706	4.36798	4.91352	0.541291	45.0001	0.918102	1.92214	9.48106	2.71548	1.92461
hsa-miR-369-3p	MIMAT0000721	10.3183	4.87571	5.93017	62.0956	7.23009	29.2704	6.8822	9.38011	2.38929	4.18809	4.00786	4.58475	2.96769	3.14768	3.16579	4.00961	16.2257	8.8381	3.71207	9.34163	4.04475	1.19335	3.65898	4.21522	10.9447	7.70402	7.13226	6.13859	1.33762	4.84377	5.02185	4.95799	80.5377	4.60773	75.7846	2.67525	3.25233	1.02833	1.63058	4.52398	29.0344	9.20194	269.349	1.70504	1.92214	5.96956	5.67782	4.57095
hsa-miR-370-5p	MIMAT0026483	0	0.541746	1.18603	9.93529	3.89313	10.155	1.0588	6.87874	3.98215	1.04702	4.58041	0	5.47882	1.04923	3.16579	1.45804	2.31796	5.43883	3.71207	2.33541	2.88911	1.19335	1.52458	1.26457	1.66953	2.38458	1.71174	1.33933	0.445874	4.23829	3.86296	3.15509	47.4133	1.09708	7.97732	0.668813	1.62616	0.514163	3.26117	1.87199	8.0403	1.08258	38.4784	1.96736	5.2859	2.8092	6.4184	2.16518
hsa-miR-370-3p	MIMAT0000722	7.37021	3.25047	1.18603	42.4508	5.00545	32.2571	2.647	8.12943	2.38929	5.58413	8.302	2.11604	8.21822	2.09845	3.69342	1.82255	13.3282	9.51796	8.66149	5.70878	1.15564	2.2541	3.9639	2.95065	5.0086	6.42002	4.70729	3.68315	1.33762	2.72462	5.40815	3.15509	166.055	4.60773	19.3735	1.33763	0.813082	0.514163	4.34822	3.27599	37.0747	1.08258	99.1307	2.62315	5.2859	4.56496	10.6151	3.36807
hsa-miR-371a-5p	MIMAT0004687	0	0	0	0	0	0	0	0.62534	0	0	0	0	0	0	0	0	0	0	0	0	0	0	0	0	0	0	0	0	0	0	0	0	0	0	0	0	562.652	0	0	0	0	0	0	0	0	0	0	0
hsa-miR-371a-3p	MIMAT0000723	0	0	1.18603	0	0	1.19471	0	0.62534	0	0	0	0	0	0	0	0	0	0	0	0	0	0	0	0	0	0	0	0	0	0	0	0	0	0	0	2.00644	1039.93	0	1.08706	0	0	0	0	0	0	0.35115	0	0
hsa-miR-372-5p	MIMAT0026484	0	0	0	0	0	0	0	0	0	0	0	0	0	0	0	0	0	0	0	0	0	0	0	0	0	0	0	0	0	0	0	0	0	0	0	0	7.31773	0	0	0	0	0	0	0	0	0	0	0
hsa-miR-372-3p	MIMAT0000724	0	0	7.70922	0	0	2.98677	0	7.50409	0	0.349008	0.286276	0	0.913136	0	0	0	0	0	0	0	0	0.662971	0.304915	0.210761	0.371008	0	0	0.223222	0	0	1.54519	0	0	0.219416	12.5358	30.0966	14389.9	1.54249	3.80469	0	0.446683	0	0	0	0	0.7023	0	0
hsa-miR-373-5p	MIMAT0000725	0	0	0.593017	0	0	0	0	0	0	0	0	0	0	0	0	0	0	0	0	0	0	0	0	0	0.185504	0	0	0	0	0	0	0	0	0	0	0	39.841	0	0	0	0	0	0	0	0	0	0	0
hsa-miR-373-3p	MIMAT0000726	0	0	1.18603	0	0.27808	2.38942	0	1.25068	0	0	0	0	0	0	0.527632	0	0	0	0	0	0	0	0	0.210761	0	0	0	0	0	0	0	0	0	0	18.2339	2.00644	2044.09	0	1.63058	0.155999	0	0.541291	0	0	0	0	0	0
hsa-miR-374a-5p	MIMAT0000727	58.9617	35.7552	37.3601	40.8702	36.7066	35.2439	34.411	39.3964	23.0965	26.8736	17.7491	23.9817	19.4041	49.3136	33.2408	81.6502	29.5539	32.633	37.1207	37.107	25.4241	16.7069	40.2488	40.8876	35.9877	46.4075	41.5098	29.1304	30.3194	26.338	29.7448	29.748	42.2173	43.6637	37.6074	38.7911	19.514	24.6798	49.461	35.2559	43.775	51.4226	45.6523	15.7389	47.0926	23.5271	31.3514	44.9877
hsa-miR-374a-3p	MIMAT0004688	1259.57	1004.4	983.222	610.117	603.991	572.266	851.275	948.016	783.687	638.335	227.017	563.571	278.506	1204.51	513.914	1361.08	878.505	639.063	749.838	535.587	844.775	530.244	841.566	927.981	601.031	1402.5	603.96	544.214	563.585	893.069	1374.06	1497.31	2348.58	1601.95	598.869	523.012	531.755	498.224	915.844	1641.27	884.879	1084.21	805.437	1049.65	1610.76	787.279	531.74	958.937
hsa-miR-375	MIMAT0000728	469.482	209.114	3037.43	1295.88	5890.02	1365.55	2670.82	162.589	1575.34	21128.2	6393.68	264.152	5289.11	1593.77	1101.17	1591.81	1842.78	450.063	5522.32	1721.46	5247.77	232268	567.142	2538.83	8711.99	78.5076	279.87	104.691	1983.25	3676.11	1176.27	1257.53	20397.9	14932.8	1713.98	441.416	4286.57	60960.7	6555.49	828.513	3949.13	2150.28	452.61	2445.69	2082.16	1553.14	1815.17	1669.6
hsa-miR-376a-5p	MIMAT0003386	0.737021	1.08349	1.18603	5.87086	3.05888	2.38942	0.5294	0	1.59286	1.39603	0.286276	0.352673	0.684852	0	0	0	5.79489	1.35971	0	0.778469	2.31128	0.132594	0.60983	0.210761	1.11302	0.550287	0.570581	0.334832	0.445874	2.11915	0	0.450727	11.4745	0.658247	14.2452	2.00644	0.813082	0	1.08706	0	6.25356	0.270645	30.0001	0.131157	0.480536	0.702301	0.493724	0.240576
hsa-miR-376a-3p	MIMAT0000729	0	0.541746	0.593017	9.70949	0.27808	4.77883	0.5294	0	0.79643	0	0	1.05802	0.684852	1.04923	0	0	2.89744	0	0	0.25949	1.15564	0	0.60983	1.26457	1.85503	0.733716	1.14116	0.558053	0.445874	0.60547	0.386296	0.450727	12.1239	0	6.8377	0.668813	0	0.514163	0	1.092	7.59361	0	33.9131	0	0.480536	0	0.987447	1.20288
hsa-miR-377-5p	MIMAT0004689	2.21106	0.541746	0.593017	5.19345	0.834241	3.58413	2.1176	3.1267	1.59286	0.698016	3.43531	1.05802	2.73941	0	0.527632	0.36451	0.579489	4.75898	0	0.77847	0	0.132594	0.914745	2.31837	1.48403	1.83429	0.855872	1.33933	0.445874	2.11915	0.772592	0.450727	11.9075	0.658247	3.98866	0	0	0	1.08706	0.935996	2.6801	0.541291	21.5218	0.393471	0.961073	1.75575	2.71548	0.721728
hsa-miR-377-3p	MIMAT0000730	1.47404	1.08349	0	5.64505	2.50272	2.98677	3.1764	0.62534	2.38929	1.04702	1.43138	1.41069	1.59799	1.04923	0.527632	0.72902	2.89744	0.679854	1.23736	1.81643	1.15564	0.397782	0.304915	1.26457	1.11302	2.38458	1.14116	1.0045	0.445874	1.51368	0.386296	1.80291	7.14447	1.53591	11.3962	2.00644	0	0	1.08706	0.155999	4.46683	1.62387	21.5218	0.262315	0	0.7023	0.987446	0.721728
hsa-miR-378a-5p	MIMAT0000731	153.3	77.4697	104.371	125.094	91.7665	86.019	60.3516	103.181	50.9715	54.0962	236.75	53.2536	207.738	72.3966	50.6527	170.226	78.231	155.687	149.72	77.8469	437.989	47.9991	181.729	91.0487	39.3268	132.803	139.364	79.0204	53.059	39.0529	130.182	31.5509	57.1558	34.2288	67.2374	26.7525	104.888	50.388	17.9364	48.3598	58.5155	64.4136	24.1305	75.2843	125.901	88.4899	177.494	105.854
hsa-miR-378a-3p	MIMAT0000732	1815.28	422.02	376.566	411.863	172.688	289.12	380.639	355.819	220.611	167.524	669.599	233.822	648.783	451.167	151.43	538.381	303.652	491.534	601.355	136.492	1832.27	143.997	1007.74	335.11	101.099	503.146	1048.3	370.213	193.955	180.127	655.545	192.01	286.212	175.752	784.057	109.016	351.251	270.45	56.5269	291.095	301.064	499.882	167.609	329.205	851.51	394.693	385.351	336.807
hsa-miR-379-5p	MIMAT0000733	685.429	486.488	433.495	1981.41	550.043	1276.55	636.868	665.362	791.652	510.948	543.924	592.138	755.62	222.436	323.438	172.778	676.264	690.732	343.985	320.989	167.568	139.224	296.987	273.357	545.38	658.693	350.907	364.744	88.2831	933.333	779.546	734.234	8451.91	667.243	3433.1	125.068	284.579	183.042	547.332	649.114	1186.84	180.52	12432.4	293.792	811.626	1175.65	887.468	383.478
hsa-miR-379-3p	MIMAT0004690	0	0	0	2.25802	1.11232	2.38942	0	0.62534	0	0	0.286276	0	0.456568	0	0	0	0	0.679854	0	0.25949	0	0.132594	0.304915	0	0.185504	0.366858	0.28529	0.334832	0	0	0	1.35218	12.5569	0.658247	1.70943	0	0	0	0	0.779997	0.446683	0	5.86958	0	0	0.7023	0.987447	0
hsa-miR-380-5p	MIMAT0000734	0	0	0	2.48382	0.27808	1.19471	0	0.62534	0	0.698016	0	0	0	0	0	0	0.579489	0	0	0.51898	0	0.132594	0	0.421522	0.927518	0.550287	0.28529	0.446443	0	0.302735	1.93148	0.450727	14.7219	0.658247	2.27923	0	0	0	1.63058	0.623998	1.78673	0	4.56523	0	0.480536	0.35115	0.987447	0.481152
hsa-miR-380-3p	MIMAT0000735	0	0	0.593017	2.25802	0.27808	0.597354	0	0.62534	0	0.349008	0.572552	0	0	0	0.527632	0.36451	0	0	0	0	0	0	0.60983	0.210761	0.185504	0.366858	0.570581	0.223221	0	0.60547	0	0	3.89698	0	2.84904	0	0	0	0	0	0.446683	0	7.17393	0	0	0	0.246862	0.240576
hsa-miR-381-5p	MIMAT0022862	1.47404	0.541746	1.18603	1.58062	1.11232	4.77883	1.0588	1.25068	1.59286	0	0.572552	0.352673	0.684852	0	0	0.72902	0.579489	1.35971	0	0.51898	0	0	0.914745	0.632283	1.29853	0.366858	0.713227	0	0	0.908205	0	0	1.29899	0	5.12828	0.668813	0.813082	0	1.08706	0.155999	1.78673	0.811935	14.3479	0	0.480536	0.702301	0.493723	0.240576
hsa-miR-381-3p	MIMAT0000736	19.8996	18.9611	23.1277	84.2242	22.5245	74.072	33.8816	31.267	21.5036	23.3835	61.8356	15.8703	70.0832	14.6892	11.0803	10.2063	49.2566	25.1546	21.035	16.3479	13.8677	12.0661	40.8586	26.5559	37.1007	77.9573	70.6094	49.2203	6.24224	23.9161	28.5859	29.748	260.015	26.9881	136.754	4.01288	15.4485	8.74077	16.3058	18.7199	41.9882	8.66065	303.914	8.39407	24.9879	36.1685	81.7112	26.704
hsa-miR-382-5p	MIMAT0000737	10.3183	11.9184	11.8603	114.03	17.241	45.9963	14.2938	21.2616	14.3357	11.1683	19.753	15.1649	17.1213	4.1969	13.1908	5.46765	27.236	36.0323	24.7471	18.9428	6.93385	4.5082	7.92779	7.5874	15.9533	14.124	14.2645	10.7146	2.22937	21.1915	6.56704	15.7754	170.168	11.1902	72.3657	5.3505	10.5701	4.1133	11.9576	5.61598	77.2762	5.68355	195.653	5.50861	10.0913	12.9926	26.4142	12.0288
hsa-miR-382-3p	MIMAT0022697	1.47404	0.541746	0.593017	12.4191	1.94656	3.58413	1.0588	1.25068	0	2.44306	2.86276	0.705346	0.913136	0	0.527632	0.72902	3.47693	0	0	0.778469	1.15564	0.397782	0.914745	1.05381	2.22604	2.56801	2.13968	2.45544	0	0.908206	1.15889	0.901453	17.3199	1.09708	10.2566	0	1.62616	0	2.17411	1.404	11.6138	1.08258	7.17393	0.524629	1.92215	2.45805	4.19665	1.20288
hsa-miR-383-5p	MIMAT0000738	0.737021	0	0	0	0.27808	0	0	0	0	0	0.286276	0	0.684852	0	0	50.3023	0	0	0	1.81643	0.577821	0.132594	0.304915	0	1.48403	0	0.142645	0	0	0	4.24926	0	0.865996	0.438831	0	0	0	0	0	18.2519	6.25356	0.811936	0	9.31217	73.5221	0	0	0.721728
hsa-miR-383-3p	MIMAT0026485	0	0	0	0	0	0	0	0	0	0	0	0	0	0	0	0	0	0	0	0	0	0	0	0	0	0	0	0	0	0	0	0	0	0	0	0	0	0	0	0.311999	0	0	0	0	0	0	0	0
hsa-miR-340-5p	MIMAT0004692	23.5847	7.0427	8.89525	21.4512	11.4013	11.3497	4.2352	10.6308	11.9465	5.58413	4.29414	7.05345	5.47882	8.3938	11.6079	12.7578	16.8052	8.15825	9.89885	13.753	13.8677	9.149	18.5998	14.5425	7.97665	6.78687	19.2571	33.9297	13.8221	5.44923	16.6107	5.85945	21.4334	27.8658	17.6641	27.4213	7.31773	7.19828	11.9576	25.1159	5.3602	22.4636	11.7392	14.0338	29.3127	12.6414	8.64016	6.97671
hsa-miR-340-3p	MIMAT0000750	12.5294	11.3767	14.2324	19.8706	7.78625	19.1153	2.647	5.62806	11.9465	7.32916	4.86669	8.81682	1.82627	8.3938	13.1908	16.0384	10.4308	10.1978	24.7471	11.1581	10.4008	9.28159	6.70814	7.37664	9.27518	6.78687	4.56465	11.8307	8.02573	6.66017	2.70407	3.60581	3.46399	8.33779	21.0829	10.701	4.87849	8.22661	14.1317	3.58799	8.48698	22.7342	16.9566	3.01662	5.2859	2.45805	5.67782	4.81152
hsa-miR-330-5p	MIMAT0004693	11.0553	14.0854	26.6858	56.6763	39.7655	26.8809	7.941	20.6362	7.9643	17.4504	41.2237	26.0978	24.6547	20.9845	44.8487	16.4029	31.8719	32.633	81.6655	29.8413	38.714	12.8616	31.4063	21.7084	77.5405	36.8692	19.8277	51.7874	48.1544	12.7149	49.4459	15.3247	43.0833	62.314	22.2225	11.3698	20.327	17.4815	29.3505	83.9277	37.9681	15.1561	13.0435	67.8083	61.0281	40.3823	25.4267	26.9445
hsa-miR-330-3p	MIMAT0000751	2.21106	4.87571	2.96509	6.99987	5.00545	3.58412	1.5882	3.1267	3.98215	2.09405	4.86669	5.64276	5.47882	1.04923	3.69342	2.91608	4.05642	2.03956	13.6109	2.5949	4.62257	2.91707	4.26881	3.16141	4.63759	2.56801	3.42349	3.90637	10.701	2.72462	9.27111	2.70436	5.84547	5.92422	2.84904	5.3505	4.06541	2.57082	0.543528	6.08398	6.25356	3.51839	4.56523	6.68902	5.2859	2.8092	3.94979	4.57095
hsa-miR-328-5p	MIMAT0026486	0	0	0	0	0	0	0	0	0	0	0	0	0	0	0	0	0	0	0	0	0	0	0	0	0	0	0.142645	0	0	0	0	0	0	0	0	0	0	0	0	0	0	0	0	0	0	0	0	0
hsa-miR-328-3p	MIMAT0000752	26.5327	32.5048	34.988	48.5475	53.9476	124.847	14.8232	44.3992	17.5215	30.7127	54.965	20.455	59.3538	100.726	65.954	154.188	129.226	84.9818	236.335	52.6764	81.4728	104.086	22.5637	34.9863	13.3563	107.489	17.8307	5.02248	99.8758	27.2462	30.9037	22.9871	25.3304	23.4775	6.8377	14.0451	20.327	25.7081	86.4209	29.7959	52.2619	40.8674	18.9131	43.5442	29.7933	10.1834	50.1129	19.9678
hsa-miR-342-5p	MIMAT0004694	7.37021	4.87571	18.9765	15.5803	15.5725	9.55767	3.1764	10.6308	3.18572	10.8192	8.58827	6.70078	12.7839	20.9845	13.1908	11.2998	9.85131	4.75898	8.66149	10.3796	5.77821	7.02749	7.31796	5.47979	8.34766	6.78687	4.56465	11.8307	15.1597	9.38479	3.86296	8.56381	2.16499	7.0213	10.8264	10.701	11.3831	10.2833	7.60939	10.14	13.8472	9.47259	3.91306	7.21365	7.20804	5.61841	7.40585	10.1042
hsa-miR-342-3p	MIMAT0000753	58.9617	197.195	496.948	274.35	218.571	297.483	128.115	325.802	265.211	195.444	152.012	157.997	199.977	305.325	467.482	207.771	189.493	241.348	258.607	399.614	233.44	72.6616	225.942	112.336	198.118	110.975	165.183	243.311	187.713	196.172	142.93	163.163	70.7952	131.869	125.928	148.476	437.438	133.682	201.649	169.415	243.442	264.962	88.6959	86.1703	107.64	206.828	114.544	187.89
hsa-miR-337-5p	MIMAT0004695	1.47404	0	0	0.451604	0.27808	0.597354	0.5294	0	0	0	0.286276	0	0.228284	0	0.527632	0	0	0.679854	1.23736	0	0	0	0.304915	0	0	0	0.142645	0.111611	0	0.605471	0	0.450727	1.29899	0	4.55847	0.668813	0.813082	0	0	0	0.446683	0.541291	4.56523	0	0	0	0	0
hsa-miR-337-3p	MIMAT0000754	19.1625	16.7941	43.2902	141.804	55.338	137.392	18.529	36.2697	20.7072	16.7524	18.0354	18.339	21.0021	8.3938	15.829	16.4029	86.9234	68.6653	30.9339	22.0566	18.4903	2.12151	17.99	17.7039	33.2051	22.3783	16.2616	8.81724	6.24224	36.3282	23.9504	22.5363	214.984	18.2115	139.033	0	4.87849	1.54249	21.7411	16.3799	57.6221	16.5094	262.175	16.9193	31.2349	42.4892	24.1924	19.4867
hsa-miR-323a-5p	MIMAT0004696	0.737021	0	0	0.451604	0	0	0	0.62534	0	0	0	0	0.228284	0	0	0	0	0	0	0	0	0	0	0.210761	0	0	0	0	0	0	0	0	1.08249	0.219416	0.569809	0	0	0	0	0	0	0	0	0	0	0	0	0
hsa-miR-323a-3p	MIMAT0000755	4.42212	2.70873	2.37207	85.579	5.00545	44.8016	3.7058	7.50409	0.79643	2.09405	3.43531	1.41069	4.10911	2.09845	1.5829	0.72902	19.1231	6.11869	3.71207	2.33541	1.73346	1.59113	1.52458	2.52913	3.52457	2.38458	2.42497	2.34382	2.22937	3.63282	1.54519	3.15509	137.477	2.41357	62.1091	3.34406	2.43925	1.54249	2.71764	0.155999	42.8816	0.811935	260.87	1.44273	1.92215	2.45805	5.92468	2.64634
hsa-miR-326	MIMAT0000756	2.94808	1.62524	5.33715	5.64505	5.00545	4.18148	1.5882	2.50136	2.38929	8.37619	20.8981	2.11604	26.2527	5.24613	5.80395	6.19667	4.63591	3.39927	6.18678	3.11388	4.04475	12.4639	3.9639	6.11207	16.5098	3.85201	1.99703	2.1206	3.12112	4.84377	6.95333	0	18.4024	8.11838	0	6.68813	0.813082	0.514163	3.26117	13.104	2.6801	1.89452	0.652176	7.08249	21.1436	9.12991	19.0083	2.64634
hsa-miR-151a-5p	MIMAT0004697	108.342	97.5143	79.4642	268.253	109.564	250.889	73.0572	96.3024	64.5108	75.0367	101.342	90.2842	113.001	231.879	151.43	231.828	185.437	186.96	315.526	184.238	229.973	74.3854	106.415	112.757	152.855	136.288	131.804	87.8376	74.461	75.6838	140.998	98.7091	62.1352	113.218	172.652	87.6145	108.14	121.857	106.531	41.8079	111.224	169.695	99.1307	89.5804	74.0026	35.8173	114.544	114.755
hsa-miR-151a-3p	MIMAT0000757	3858.3	2410.77	1763.63	3625.48	2212.41	3409.1	2236.71	1957.32	2007	3008.8	3288.74	3121.51	3463.52	4916.67	2742.63	4795.13	2427.48	2555.57	2915.21	1793.59	4819.61	2507.36	1745.94	3048.24	4106.31	3078.12	2611.84	2246.05	2788.94	1947.19	9300.09	2815.24	2930.53	4758.9	3199.48	1445.3	1605.02	2884.45	2021.92	2614.39	2593.44	2513.21	2951.75	3972.36	5174.42	1723.8	3062.07	1910.9
hsa-miR-135b-5p	MIMAT0000758	71.491	51.4659	91.9176	45.3862	31.9792	29.8677	109.586	65.6607	69.2894	58.9823	24.3334	328.338	41.0911	15.7384	39.5724	4.00961	9.27182	151.607	49.4942	167.89	38.1362	62.3193	28.0522	31.4034	64.1842	9.17145	16.6895	43.1933	12.4845	45.1076	10.43	14.874	33.5574	23.9163	593.171	210.676	100.009	85.351	16.3058	26.9879	61.6423	118.272	71.0872	5.11514	9.61073	81.4669	16.2929	51.9644
hsa-miR-135b-3p	MIMAT0004698	0	0.541746	0	1.80642	1.66848	0	3.7058	1.25068	2.38929	1.74504	2.57648	4.23207	3.65254	1.04923	1.05526	0	0	4.07912	3.71207	2.85439	0.577821	3.84523	1.52458	1.05381	1.48403	0.183429	3.28084	1.89738	0	0.605471	0.386296	0.450727	1.08249	0.219416	6.2679	2.67525	0.813082	1.54249	0.543528	0.623998	1.34005	0.811936	0.652176	0	0.480536	0	1.23431	4.08979
hsa-miR-148b-5p	MIMAT0004699	7.37021	1.62524	2.96509	5.19345	2.7808	1.79206	0	6.87874	3.98215	4.88611	1.1451	2.82138	1.3697	8.3938	3.69342	12.0288	2.89744	3.39927	6.18678	3.11388	2.88911	1.45853	3.9639	1.05381	4.08108	1.284	1.99703	2.67866	3.12112	2.72462	1.15889	2.25363	4.32998	2.19416	11.3962	6.01931	3.25233	1.54249	3.80469	0.935996	3.57346	5.68355	2.6087	1.44273	0.480536	0.7023	2.71548	3.12749
hsa-miR-148b-3p	MIMAT0000759	793.034	262.205	273.974	239.576	201.33	238.344	160.408	208.864	209.461	205.915	113.651	220.42	152.494	245.519	274.369	553.326	203.98	170.643	310.576	235.357	272.732	133.257	118.002	189.053	182.35	127.116	143.786	173.331	385.681	185.879	187.74	135.669	210.437	233.678	806.849	452.786	347.999	131.626	238.609	197.339	207.261	847.12	536.741	98.4991	125.42	90.948	173.544	176.823
hsa-miR-331-5p	MIMAT0004700	5.89617	3.79222	1.77905	5.19345	4.44929	13.1418	2.647	1.87602	7.16787	3.14107	4.58041	6.70078	4.3374	8.3938	3.69342	12.3933	4.63591	8.15825	13.6109	6.74674	6.93386	4.77339	2.74424	11.3811	6.49263	3.85201	3.70878	4.46443	2.22937	3.63282	13.5204	1.80291	3.46398	7.67955	7.97732	10.0322	4.87849	8.22661	4.34822	4.52398	4.02015	5.14226	5.86958	2.7543	10.0913	4.2138	5.92468	4.08979
hsa-miR-331-3p	MIMAT0000760	49.3804	31.4213	31.4299	81.7404	36.4285	49.5804	20.6466	24.3883	23.8929	44.324	64.4121	29.9772	57.7558	48.2644	27.4369	107.166	31.2924	50.9891	117.549	42.8158	69.9164	53.3029	26.8325	76.0847	53.054	53.1944	29.5276	21.206	37.4534	20.586	66.443	18.9305	44.1658	64.947	45.5847	94.3026	13.8224	19.5382	17.3929	26.9879	39.3081	36.2665	92.609	15.87	72.0805	40.7335	63.9372	38.4922
hsa-miR-324-5p	MIMAT0000761	44.2212	29.2543	36.767	63.6762	43.6586	71.6825	17.9996	18.7602	27.8751	21.9875	24.3334	32.7986	23.5132	57.7074	48.0145	65.2472	142.554	108.777	220.249	26.9869	39.2918	36.0656	35.98	50.5826	70.1203	72.0876	30.0982	16.1836	79.3656	21.7969	12.3615	22.5363	38.9698	34.8871	30.7697	52.1674	27.6448	23.6515	48.374	8.89197	62.5356	23.8168	30.0001	24.6576	31.7154	17.9087	36.0418	23.817
hsa-miR-324-3p	MIMAT0000762	16.9515	30.8795	19.5696	45.8378	15.5725	37.6333	12.7056	17.5095	30.2643	7.67817	37.7884	17.281	36.7537	51.412	46.4316	77.2761	89.8208	44.8704	138.584	26.2085	42.181	61.2585	29.2719	45.3136	28.1965	69.5196	41.7951	13.5049	31.2112	4.23829	45.1967	24.3392	69.7127	60.1199	7.40751	14.0451	14.6355	14.9107	23.9152	16.6919	37.0747	20.8397	19.5653	36.3306	111.965	17.9087	45.9163	21.6519
hsa-miR-338-5p	MIMAT0004701	5.15914	1.08349	6.52318	1.12901	5.28353	0.597354	4.2352	3.1267	1.59286	6.28214	8.01572	2.11604	13.2405	2.09845	1.5829	2.55157	0	0.679854	6.18678	2.33541	1.15564	0.662971	1.52458	3.16141	4.82309	2.20115	2.85291	7.81275	2.67524	6.0547	0.772592	4.05654	2.81449	3.07182	2.27923	13.3763	3.25233	2.05665	3.26117	4.05598	8.93366	5.41291	0.652176	0.524629	2.40268	5.26726	1.48117	3.12749
hsa-miR-338-3p	MIMAT0000763	98.0238	157.106	703.318	287.446	1055.04	320.182	446.814	296.411	336.093	390.191	431.704	221.126	589.429	228.731	111.33	307.646	491.407	211.435	780.771	270.129	228.239	57.6785	246.981	368.832	405.325	184.896	187.436	757.39	235.867	471.359	95.4152	584.592	110.415	96.104	365.247	797.894	234.981	156.306	430.474	120.744	867.459	413.275	99.1307	44.5935	103.315	127.819	137.502	252.605
hsa-miR-339-5p	MIMAT0000764	28.7438	25.4621	14.8254	83.5468	66.7393	63.3196	37.058	17.5095	59.7323	34.9008	64.6983	52.5482	36.7537	17.8368	29.0198	154.188	86.3439	199.197	112.599	45.1512	46.2257	44.6843	51.2258	74.1879	68.6363	59.0641	29.2423	22.9918	24.0772	22.0997	28.9722	9.46526	24.6809	35.1065	36.4678	18.7268	39.0279	67.3553	50.5481	21.3719	13.4005	91.2075	28.0436	17.1816	29.3127	60.3979	31.5983	27.6663
hsa-miR-339-3p	MIMAT0004702	27.2698	10.8349	7.1162	14.6771	12.2355	16.7259	24.3524	11.8815	15.1322	16.7524	10.3059	8.46415	19.1759	19.9353	11.6079	26.9737	16.8052	35.3524	21.035	12.9745	6.35603	10.8727	11.5868	10.1165	8.90417	8.62116	10.6984	5.80376	16.9432	12.7149	20.86	4.95799	5.84548	11.1902	50.1432	22.7396	34.9625	34.4489	23.9152	37.7519	3.12678	18.4039	24.7827	16.2635	8.64965	14.046	11.8494	5.29267
hsa-miR-335-5p	MIMAT0000765	38.3251	6.50095	14.2324	15.5803	27.2519	56.7487	9.5292	4.37738	11.9465	20.5915	7.1569	29.2718	7.98994	14.6892	11.6079	31.7123	19.1231	19.0359	27.2218	12.4555	16.179	10.7401	9.75729	15.1748	15.7678	5.31944	11.269	6.69664	39.6828	8.17385	40.1748	10.8174	25.9799	34.8871	18.2339	20.7332	9.75698	19.024	35.8728	17.9399	32.6079	48.4455	33.261	24.0018	11.5329	28.092	3.2092	5.53325
hsa-miR-335-3p	MIMAT0004703	215.947	30.8795	56.3366	115.836	120.687	487.441	86.2922	32.5177	76.4573	188.464	53.5336	136.837	111.631	172.073	101.305	409.709	152.985	59.8272	148.483	106.91	149.656	128.351	95.4385	105.591	207.207	49.8927	139.507	87.8376	192.172	49.0431	349.985	53.1857	337.739	126.603	104.275	64.206	74.8035	115.172	141.861	61.6198	224.235	328.834	296.088	547.319	38.9234	68.4743	67.887	152.525
hsa-miR-133b	MIMAT0000770	1.47404	1.62524	0.593017	0.225802	0.55616	0	0.5294	0	0	1.04702	5.72552	1.05802	0.684852	0	1.05526	1.09353	0	0	0	0.51898	0	0	0.304915	0.421522	1.29853	0.366858	0.142645	0.223222	0	0	0.386296	0.901454	0.216499	0.658247	0.569809	0	0	0	0.543528	0.779997	0.446683	1.35322	0	0.786944	0	0	2.46862	0.240576
hsa-miR-345-5p	MIMAT0000772	72.228	50.3824	17.1975	109.514	35.5943	50.7751	25.4112	23.1376	35.8394	16.7524	20.0393	53.2536	20.089	47.2151	17.4119	32.4414	78.231	93.14	69.2919	21.2782	61.2491	71.6009	9.45237	39.2015	65.2972	50.8098	22.6806	10.045	34.7782	19.3751	14.293	14.874	20.7839	33.1317	29.6301	57.5179	13.8224	71.4686	26.6329	8.42397	60.3022	41.4087	54.1306	36.0683	19.702	25.2828	56.0376	16.3592
hsa-miR-345-3p	MIMAT0022698	1.47404	3.79222	1.18603	2.48382	0.27808	1.79206	1.0588	0	1.59286	0.349008	0.572552	1.41069	0.684852	0	1.05526	0.72902	0.579489	3.39927	0	1.29745	3.46693	1.19335	0	1.05381	0.742015	0.733716	0	0.111611	1.33762	0.302735	0.386296	0.450727	1.08249	0	0	0.668813	1.62616	2.05665	0.543528	0.311998	1.34005	0.270645	0	2.22967	0.961073	0.35115	0.493723	1.44346
hsa-miR-346	MIMAT0000773	0	0.541746	0.593017	0.225802	0	0	0	0	0	0	0	0	0	0	0	0.36451	0	0	1.23736	0	1.15564	0	0	0	0	0	0	0	0	0	0.772592	0	0	0	0	0	0	0.514163	0	0.155999	0	0	0	0	0	0	0	0
hsa-miR-196b-5p	MIMAT0001080	568.243	271.956	316.671	577.15	475.239	1250.26	345.698	327.053	28.6715	200.331	83.3063	1286.9	221.435	1772.14	998.28	2367.86	2011.99	1108.16	421.938	759.008	819.928	7.42528	438.468	780.659	408.293	252.215	149.92	210.498	1119.14	143.497	699.583	434.951	641.27	1183.31	683.201	726.331	127.654	20.5665	876.71	131.04	2059.21	2604.15	3812.62	1929.19	385.39	14.7483	1985.26	547.311
hsa-miR-196b-3p	MIMAT0009201	0.737021	0	0	0	0.556161	0	0	0.62534	0	0	0	0	0	0	0	0.729019	1.15898	1.35971	0	0	0	0	0.60983	0.632283	0.185504	0	0.142645	0	0	0	0	0	0	0.219416	0.569809	0.668813	0	0	0	0	0.446683	0.270645	0	0.786945	0	0	0.246862	0
hsa-miR-422a	MIMAT0001339	0	0	0	0	0	0	0	0	0	0	0	0	0.228284	0	0	0	0	0	0	0	0	0	0	0	0	0	0	0	0	0	0	0	0	0	0	0	0	0	0	0	0	0	0	0	0	0	0	0
hsa-miR-423-5p	MIMAT0004748	54.5395	27.0873	21.3486	63.4504	55.0599	30.4651	35.4698	27.515	31.0608	34.5518	38.0747	19.0443	54.7882	44.0675	36.9342	57.957	42.3027	36.0323	40.8327	31.9172	61.8269	20.2869	41.4685	53.5333	54.3525	26.0469	52.6361	55.0241	29.8736	33.6036	78.0319	15.3247	76.4242	173.338	56.4111	109.685	28.4579	119.286	60.8751	82.6797	25.9076	39.5142	17.6087	102.827	82.6523	73.0393	22.9581	37.0487
hsa-miR-423-3p	MIMAT0001340	173.937	96.4308	94.2897	271.866	219.962	209.671	85.2334	65.6607	130.615	79.2248	164.895	36.3253	179.888	168.925	170.425	295.617	151.826	236.589	294.491	188.13	262.331	129.677	212.221	181.254	146.733	88.2293	193.284	119.089	88.729	81.1331	85.3715	31.5509	89.8471	100.931	68.377	180.579	119.523	631.392	128.816	41.9638	103.184	140.465	50.2175	134.305	56.2228	71.6347	114.791	165.035
hsa-miR-424-5p	MIMAT0001341	210.788	93.1803	111.487	128.707	90.9323	248.499	128.644	110.06	136.986	66.3115	16.604	70.5345	53.6467	92.3318	61.2053	54.6765	118.216	144.129	110.125	66.6889	65.8716	22.2758	34.7603	96.7393	145.806	111.708	81.1652	140.406	35.6699	79.3166	85.3715	74.3699	53.0423	158.857	173.792	165.197	61.7942	15.939	92.9432	97.1877	117.031	149.126	373.045	52.5941	117.251	241.592	29.3765	25.9822
hsa-miR-424-3p	MIMAT0004749	4.42212	2.16698	2.96508	2.25802	1.94656	2.98677	1.0588	0.62534	0	2.09405	1.1451	1.76336	5.02225	2.09845	1.05526	1.09353	4.05642	1.35971	4.94942	1.29745	1.15564	1.98891	1.52458	2.52913	4.63759	4.03544	1.5691	4.57604	3.12112	0.908206	1.15889	0.901453	0.216499	4.60773	1.70943	2.00644	2.43925	2.57082	1.63058	1.55999	1.78673	1.62387	3.26088	1.04926	2.88322	2.8092	3.70292	0.240576
hsa-miR-425-5p	MIMAT0003393	308.075	108.349	331.496	153.997	168.795	123.055	268.935	220.12	523.255	498.034	189.228	154.471	165.049	425.986	240.073	255.157	155.883	99.2587	148.483	437.24	522.928	133.655	122.271	311.505	94.9778	67.3184	149.064	165.295	435.619	189.21	203.192	308.748	751.252	177.507	518.526	1138.99	325.233	684.865	674.518	70.1998	137.578	233.026	214.566	114.631	118.212	753.569	114.791	112.349
hsa-miR-425-3p	MIMAT0001343	4.42212	3.25047	6.52319	11.2901	10.5671	15.5312	4.7646	8.75477	9.55716	5.23512	7.44317	12.6962	8.44651	16.7876	5.80395	6.92568	17.3847	4.75898	19.7977	7.26572	8.66732	17.3698	6.70813	17.0716	12.9852	11.0057	13.5513	6.91986	12.4845	4.54103	12.3615	4.95799	18.8354	10.7514	9.68675	4.68169	4.06541	10.2833	19.567	5.14798	8.0403	17.5919	5.21741	7.34481	6.72751	13.6949	21.477	8.66074
hsa-miR-18b-5p	MIMAT0001412	0.737021	0.541746	0	2.25802	0.27808	1.19471	0.5294	0	1.59286	1.39603	0.286276	0	0.684852	0	0.527632	1.09353	0.579489	0.679854	2.47471	0.778469	0	2.65188	0.304915	2.52913	3.15356	0.733716	0.855872	0.558053	0.445874	0	1.15889	0.450727	1.73199	0.438832	1.13962	2.00644	0.813082	0	0.543528	0.311999	1.78673	0	0	2.36083	0.961073	0.7023	0.987447	1.92461
hsa-miR-18b-3p	MIMAT0004751	0	0	0	0.677406	0	0	0	0.62534	0	0	0	0.352673	0	0	0	1.09353	0	0	0	0.25949	0.577821	0.132594	0	0.210761	0.185504	0.366858	0	0.223222	0.445874	0	0.772592	0	0	0	0	0	0	0	0	0.311998	0	0	0	0.524629	0	0	0	0.240576
hsa-miR-20b-5p	MIMAT0001413	64.1208	9.75143	24.3137	56.4505	8.06433	40.6201	7.4116	38.7711	58.1394	3.14107	8.58827	32.4459	14.3819	18.8861	55.4014	250.418	147.77	33.9927	34.646	21.7971	114.409	85.9211	15.5507	17.7039	26.527	30.9995	57.914	23.3266	41.4663	5.1465	23.1778	11.2682	11.258	4.38831	58.6903	6.01931	8.9439	7.19828	5.9788	8.26797	25.0143	33.56	52.8262	34.2321	6.72751	3.86265	4.93723	27.9068
hsa-miR-20b-3p	MIMAT0004752	8.10723	2.16698	1.18603	4.29024	1.11232	9.55767	2.1176	6.2534	2.38929	0	0.286276	3.52673	0.913136	0	3.16579	19.319	16.8052	2.03956	4.94942	1.55694	4.62257	5.83415	0.304915	0.421522	2.04054	4.4023	4.27936	0.892886	1.7835	0.908206	2.31778	0.450727	0.865996	0	3.98866	0	0	0	0.543528	1.40399	2.6801	2.16516	3.26088	3.27893	0	0	0.246862	1.92461
hsa-miR-448	MIMAT0001532	0	0	0	0	0	0	0	0	1.59286	0	0	0	0	0	0	2.91608	0	0	0	0	0	0	0	0	0.371008	0	0.855871	0.558054	0	0	0.386296	0	0.432998	0	1.70943	0	0	0	0	0	0	2.9771	0	0	0	0	0	0.481152
hsa-miR-429	MIMAT0001536	297.019	148.438	107.929	261.93	116.238	103.342	83.1158	216.993	183.179	76.0837	107.067	373.128	44.0588	174.171	64.3711	80.9212	183.119	354.884	288.304	67.7268	226.506	262.537	148.494	153.012	167.51	298.806	351.335	73.6631	627.345	92.9397	120.524	61.2988	294.655	479.423	276.357	28.7589	106.514	140.366	303.288	40.2479	138.025	262.526	73.6959	28.33	66.314	56.5352	117.753	164.795
hsa-miR-449a	MIMAT0001541	4.42213	0	0.593017	4.51604	2.22464	0	2.647	0	0	9.42321	3.14903	1.05802	0.684852	0	0	1.09353	1.15898	0	0	0.25949	9.82296	0.265188	0	1.26457	0	0.366858	0.142645	0.446443	12.9304	4.23829	6.18074	0.901454	0	0.658247	3.98866	2.00644	1.62616	2.05665	0.543528	0.155999	3.57347	1.35323	1.30435	0.131157	0	0	0	0
hsa-miR-450a-5p	MIMAT0001545	5.89617	2.70873	6.52318	18.7416	8.62049	29.2704	8.4704	10.0054	6.37144	4.18809	2.86276	7.05345	2.96769	12.5907	3.69342	8.01921	16.2257	16.3165	12.3736	5.70878	14.4455	3.71264	5.18356	9.69501	21.3329	8.25431	9.1293	9.48691	7.57986	9.99026	3.09037	4.50727	1.73199	7.89896	5.12828	9.36338	2.43925	1.02833	3.80469	5.14798	11.1671	10.2845	13.0435	4.85282	8.16912	8.07646	2.96234	2.16518
hsa-miR-450a-1-3p	MIMAT0022700	0.737021	0	0	0	0.27808	0	0	0	0	0	0	0.352673	0.228284	1.04923	0	0.36451	0.579489	2.03956	0	0.25949	0	0	0.304915	0.210761	0.371008	0.183429	0	0.223222	0	0	0	0	0	0	0	0	0	0	0	0.155999	0	0.270645	0	0	0	0	0.246862	0.240576
hsa-miR-431-5p	MIMAT0001625	2.94808	0.541746	0	13.0965	0.55616	5.37619	0.5294	1.25068	1.59286	0.349008	3.43531	1.05802	1.3697	0	0	0	9.27182	1.35971	0	0.51898	0	0.795564	0.60983	0.632283	2.22604	2.20115	1.14116	0.781275	0	1.51368	1.54519	0.901453	50.8773	1.53591	63.2488	0.668813	0	0.514163	0	0.623997	19.2074	0.54129	148.044	0.262314	1.44161	3.16035	2.46862	0.962304
hsa-miR-431-3p	MIMAT0004757	3.6851	2.16698	5.93017	146.094	8.06433	59.1381	2.647	16.2588	3.98215	5.93314	10.8785	3.52673	9.35964	2.09845	1.5829	5.83216	54.472	14.9568	3.71207	5.44929	2.8891	1.06075	1.82949	3.7937	5.75061	5.31944	2.71026	1.22772	1.7835	6.35744	3.47667	6.7609	517.433	5.92422	58.6903	0	1.62616	0.514163	3.80469	2.18399	88.89	2.16516	196.305	3.14777	9.61073	6.67186	21.477	4.57095
hsa-miR-433-5p	MIMAT0026554	0	0	0	0.677406	0	0	0	0.62534	0	0	0	0	0	0	0	0	0	0	0	0	0	0	0	0	0.185504	0.183429	0	0	0	0	0	0	0.216499	0.219416	0.569809	0	0	0	0	0	0.446683	0	0	0	0	0	0.246862	0
hsa-miR-433-3p	MIMAT0001627	0	0	2.37207	10.8385	0.834241	4.18148	0	1.87602	0.79643	0.698016	0.858827	0.705346	0.913136	0	0	0.36451	2.31796	0	1.23736	0.25949	0	0.132594	0.304915	0.210761	1.66953	0.366858	0.570581	0.334832	0	0.605471	0	1.35218	23.8149	0.658248	6.2679	0	1.62616	0.514163	1.08706	1.24799	11.1671	0	16.3044	0.262314	0	0.702301	2.46862	0
hsa-miR-329-5p	MIMAT0026555	0	0	0	0	0	0.597354	0	0	0	0	0.286276	0	0	0	0	0	0	0	0	0.25949	0	0	0	0	0	0	0	0.111611	0	0	0	0	0.216499	0	0	0	0	0	0	0	0	0	0	0	0	0	0	0
hsa-miR-329-3p	MIMAT0001629	1.47404	0	0.593017	8.58048	0	2.38942	0.5294	1.25068	0	0.349008	0.858828	1.41069	0.456568	0	0	0.72902	0	3.39927	2.47471	0.25949	0	0	0.304915	0.421522	0.556512	0.733716	0.855871	0.669665	0	0.302735	0	0	26.8459	1.31649	9.68675	0	0	0	0	0.311998	4.91352	0.270645	13.0435	0.393472	0.480536	1.4046	1.72803	0.962304
hsa-miR-451a	MIMAT0001631	381.04	321.797	291.171	126.901	549.487	105.134	114.88	193.23	53.3608	163.336	125.103	56.4276	134.688	263.356	106.054	279.214	375.509	1191.78	146.008	155.953	116.72	55.4244	1100.74	4799.24	155.823	850.927	766.148	337.622	3078.76	263.682	91.5522	290.268	38.9698	65.3858	214.248	234.084	274.822	267.365	284.265	349.439	607.042	375.656	271.305	630.342	275.347	707.568	220.694	216.519
hsa-miR-452-5p	MIMAT0001635	422.313	315.296	141.731	172.739	156.281	59.7354	82.5864	55.03	65.3073	60.0294	265.95	102.98	69.6266	101.775	111.33	170.955	102.57	212.114	587.744	47.2271	320.691	68.4186	227.772	303.496	44.7064	510.299	574.147	275.678	91.8501	110.196	230.233	82.483	22.0829	282.607	180.06	10.0322	48.7849	459.662	42.3952	149.759	42.8816	127.745	90.0003	35.1502	395.962	219.469	109.607	100.08
hsa-miR-452-3p	MIMAT0001636	67.0689	29.2543	16.6045	31.3865	13.3479	2.98677	12.1762	4.37738	7.9643	5.93314	8.87455	10.2275	2.96769	8.3938	7.38685	19.319	13.3282	23.115	58.1557	5.44929	51.4261	5.30377	10.672	30.3496	3.71007	31.7332	22.6806	13.5049	10.2551	10.8985	10.8163	4.50727	1.08249	15.5785	41.596	0.668813	5.69157	22.109	3.26117	6.55197	3.57347	22.7342	10.4348	2.62315	11.5329	9.48106	5.43096	9.62305
hsa-miR-409-5p	MIMAT0001638	12.5294	8.66793	10.0813	41.5476	12.7917	21.5048	13.235	26.2643	13.5393	11.8663	8.01572	15.1649	10.7293	4.1969	6.85922	3.6451	20.8616	12.2374	13.6109	8.82265	8.0895	1.19335	5.48847	3.58294	9.08967	10.272	5.13523	5.69215	3.12112	24.8243	6.18074	11.2682	76.4242	5.26597	192.595	2.00644	19.514	5.65579	21.1976	4.05598	53.1553	1.89452	166.305	8.65638	3.84429	6.32071	11.1088	7.69844
hsa-miR-409-3p	MIMAT0001639	8.84425	10.8349	11.2673	147.223	16.6848	92.5899	10.588	28.1403	13.5393	11.5173	15.4589	14.1069	19.1759	8.3938	16.3566	6.92568	39.4053	24.4747	17.323	28.8034	4.62257	3.71264	8.23271	7.16587	13.7273	17.4258	7.98814	10.7146	2.67524	20.586	14.6793	23.8885	219.314	10.0931	156.128	3.34406	9.75698	5.14163	16.8494	6.55197	128.645	8.11936	264.131	5.24629	27.3906	24.5805	34.8075	14.9157
hsa-miR-412-5p	MIMAT0026557	2.94808	3.79222	1.77905	48.9991	0.83424	1.79206	2.647	2.50136	3.18572	3.83909	6.87062	1.05802	5.02225	0	5.80395	2.18706	19.1231	3.39927	1.23736	4.41133	4.04475	0.530376	0.914745	2.31837	0.927519	1.284	0.57058	2.90188	0	1.51368	3.86296	0.450727	126.002	3.94948	45.0149	0.668813	3.25233	1.02833	9.7835	2.65199	5.80688	3.51839	11.087	1.04926	6.24697	0.35115	8.14644	2.88691
hsa-miR-412-3p	MIMAT0002170	0	0	0	1.12901	0	0	0	0	0	0	0	0	0	0	0	0	0	0	0	0	0	0	0	0	0	0	0	0	0	0	0	0	1.08249	0	1.13962	0	0	0	0	0	0	0	0	0	0.480536	0	0	0.240576
hsa-miR-410-5p	MIMAT0026558	0	0	0	0.677406	0.27808	0	0	0	0	0	0	0	0.684852	0	0	0.36451	0	0.679854	0	0.25949	0	0	0	0	0	0	0	0	0	0	0	0	1.94849	0.219416	0	0	0	0	0	0.155999	0.893366	0.270645	1.95653	0	0	0	0	0
hsa-miR-410-3p	MIMAT0002171	4.42212	2.16698	3.5581	55.7731	8.89857	18.518	3.1764	23.7629	7.16787	7.32916	12.3099	6.34811	12.7839	4.1969	3.69342	1.09353	25.4975	5.43883	6.18678	1.81643	1.73346	2.12151	5.48847	9.90577	8.71867	7.52059	14.5498	8.14758	1.33762	9.08206	7.33963	8.11308	352.244	7.0213	61.5393	0	6.50465	5.14163	4.89175	4.99198	48.2418	2.9771	254.349	1.57389	11.5329	3.86266	28.636	8.42017
hsa-miR-376b-5p	MIMAT0022923	0.737021	1.62524	0	4.74184	2.7808	2.38942	0	0	0.79643	1.04702	0	1.41069	0.456568	0	0	0	1.73847	1.35971	1.23736	1.03796	0	0.265188	0	0	1.48403	1.10057	0.28529	0.223221	0	1.21094	0.386296	0.450727	3.46399	0.219416	3.41885	0	0	0.514163	2.17411	0.311998	3.57347	0.54129	14.3479	0.524629	0	1.4046	0.493724	0.240576
hsa-miR-376b-3p	MIMAT0002172	0	0.541746	1.18603	4.74184	1.11232	2.98677	1.0588	1.87602	0	1.04702	1.43138	0.705345	0.913136	0	0	0	3.47693	2.71942	0	0	0	0	0.914746	0.421522	1.85504	0.733716	1.14116	0.223221	0	1.21094	0	0	12.9899	0.438831	7.40751	0	0	0	1.08706	0.155999	6.25357	0.54129	13.6957	0.262315	0	1.75575	1.97489	0.240576
hsa-miR-483-5p	MIMAT0004761	1.47404	0.541746	0	0.903208	0.556161	87.8111	0	0.62534	0	0	0	0	0.456568	0	0	0	0	2.03956	1.23736	0.51898	0.577821	0.265188	0	0	0.927518	3.48515	2.13968	0.781276	251.919	0.302735	0.386296	0	18.8354	28.0852	1.13962	0.668813	0	0	0	0.155999	9.82703	0	0.652176	1.04926	0.480536	1.4046	0	0
hsa-miR-483-3p	MIMAT0002173	0.737021	0	0	2.48382	0.27808	351.842	0.5294	0	0	0	0.286276	0	0.228284	0	0	0.729019	1.73847	2.71942	1.23736	0.51898	4.62257	0.265188	0.304915	0.210761	0.742016	3.30172	0.427936	0.558054	268.416	0.60547	0.386296	0.450727	17.3199	10.0931	0	0.668813	0	0	0.543528	0.935996	8.48698	0	0	0.786943	0.480536	0.7023	0.246862	0.481152
hsa-miR-484	MIMAT0002174	72.9651	54.7163	75.3131	152.191	107.061	100.356	53.4694	113.812	49.3787	82.7149	97.3338	47.2581	120.991	54.5597	66.4816	127.214	68.3797	95.1796	80.4281	110.543	163.523	127.556	78.0583	88.3089	75.4999	65.851	44.22	41.7424	98.9841	46.6212	86.9167	50.9321	81.6202	95.2264	90.5996	82.9328	67.4858	189.726	186.43	51.1678	88.4433	39.5142	73.0437	152.142	103.796	84.9784	59.7405	48.1152
hsa-miR-485-5p	MIMAT0002175	0	0	0	0.677406	0.27808	0	0	0.62534	0	0.698016	0	0	0.228284	0	0.527632	0	0	0	0	0.51898	0	0	0	0.210761	0	0	0.427936	0	0	0	0	0	4.11348	0.438831	0.569809	0	0	0	0	0.311998	0.893366	0	3.91305	0.131157	0	0.7023	0.246862	0.240576
hsa-miR-485-3p	MIMAT0002176	1.47404	0	1.77905	30.4833	1.94656	10.7524	2.1176	6.87874	0.79643	2.09405	2.29021	0.352673	5.47882	0	0.527632	1.45804	6.37438	3.39927	4.94942	1.29745	1.15564	0.132594	3.35407	1.47533	4.45209	2.56801	1.14116	3.34832	0.891748	2.42188	1.54519	1.35218	66.2487	3.29123	28.4904	0	0	1.02833	1.63058	2.18399	27.2477	0.270645	98.4785	1.96736	0.961073	3.16035	7.40585	1.92461
hsa-miR-486-5p	MIMAT0002177	22.8476	28.1708	50.9994	37.9348	144.602	47.7884	14.2938	26.8896	11.15	18.8464	58.9728	9.52216	61.865	59.8058	51.1803	76.547	49.8361	324.29	29.6965	45.1512	34.6693	46.1428	163.13	585.916	31.9066	173.524	144.928	62.0555	570.719	34.8146	19.3148	67.1583	9.95896	18.4309	96.2977	18.0579	36.5887	67.8695	26.0893	76.2837	95.1435	25.17	18.9131	148.864	101.874	185.056	84.1798	70.7294
hsa-miR-486-3p	MIMAT0004762	2.21106	0	1.18603	0.451604	0.27808	0	0.5294	0	0.79643	0	0	0	0.228284	2.09845	1.5829	0.72902	0	0.679854	0	0	0.577821	1.06075	0.304915	1.05381	0.371007	0.917145	0.570581	0.223221	0	0.302735	0.386296	0	0	0.438831	4.55847	0.668813	0.813082	0.514163	0.543528	1.24799	0.446683	0.270645	0	0	0	0.702301	0.740585	0.481152
hsa-miR-487a-5p	MIMAT0026559	0	0.541746	0.593017	7.67727	0.834241	1.19471	0.5294	2.50136	0	1.74504	0.572552	0.705346	0.913136	2.09845	0.527632	1.09353	1.73847	0.679854	0	1.29745	1.15564	0.265188	0.60983	0	0.556511	0.366858	0.427936	0.334832	0.445874	0.302735	1.54519	0	10.6085	0.438832	6.8377	0	0.813082	0	0	0	4.91352	0.541291	9.78264	0.786943	0	1.4046	1.23431	0.240576
hsa-miR-487a-3p	MIMAT0002178	0	0	0	7.45147	0.556161	5.97354	0	1.25068	1.59286	0	0.572552	1.41069	0	0	0	0.36451	1.15898	2.03956	1.23736	0.25949	0	0	0.304915	0.632283	0.742015	0.550287	0.142645	0.111611	0	0.605471	0	0	19.4849	0	4.55847	0	0	0	1.08706	0.155999	5.3602	0	11.7392	0	0	0	0	0
hsa-miR-488-5p	MIMAT0002804	0	0	0	0.225802	0.27808	0	0	0	0	0	0	0	0	0	0	0	0	0	0	0	0	0.132594	0	0	0	0	0	0	0	0	0	0	0	0	0	0.668813	0.813082	0	1.08706	0.311999	0	0.270645	0.652176	0.524629	0	0	0.246862	0
hsa-miR-488-3p	MIMAT0004763	0	0	0	0.225802	0	0	0	0	0	0	0	0	0	2.09845	0	0.36451	1.15898	0	0	0	0	0.132594	0	0	0.556511	0	0	0	0	0	0	0	0.432998	0	0	0	0	0	0.543528	0.623997	0.446683	2.9771	4.56523	0.262315	0	0	0	0
hsa-miR-489-5p	MIMAT0026605	0	0	0	0	0	0	0	1.25068	0.79643	1.04702	0	0	0	0	0	0	0	0	0	0	0	0	0.304915	0.421522	0.185504	0.183429	0	0	0	0	0	0	0	0	0	0.668813	0	0	0.543528	0.155999	0	0	0	0.131157	0	0	0	0.240576
hsa-miR-489-3p	MIMAT0002805	0.737021	0	0.593017	0	0.556161	0.597354	0	0	0	1.74504	0.286276	0	0.456568	0	1.5829	0.36451	0	1.35971	0	0	0.577821	0	0	0.210761	0.742015	0.917145	1.14116	0	0	0.302735	0	0	0	0.219416	0.569809	0	0.813082	0	0.543528	0.311998	0.446683	0.270645	0	0.262315	0	0	0.246862	0
hsa-miR-490-5p	MIMAT0004764	0.737021	0	0	0	0	0	0	0.62534	0	0	0	0	0	0	0	0	0	0	0	0	0	6.7623	0	0	0	0	0	0	0	0	0	0	0	0	0	0	0	0	0	0	0	0	0	0.393472	0	0	0	0
hsa-miR-490-3p	MIMAT0002806	0	0.541746	0	0.451604	0	0	0	0	0	0	2.00393	0	0.228284	0	0	0	0	0	0	0	0	47.8665	0	0	0	0.183429	0	0.111611	0.445874	0.302735	0	0	0	0	0	0	0	0.514163	13.5882	0.155999	0	0.270645	0	0	0	0	0	0
hsa-miR-491-5p	MIMAT0002807	3.6851	0.541746	1.18603	2.48382	1.94656	2.38942	1.0588	1.87602	1.59286	3.49008	2.57648	0	2.73941	1.04923	1.5829	3.6451	1.73847	4.07912	4.94942	2.85439	0.577821	1.45853	0.914745	2.95065	2.59705	1.284	0.713226	0.669665	1.33762	2.72462	0.386296	1.80291	4.32998	0	1.70943	7.35694	0	2.57082	2.17411	1.87199	0.446683	1.35323	1.95653	1.96736	0	2.8092	3.45607	0.721728
hsa-miR-491-3p	MIMAT0004765	1.47404	0	0.593017	0.225802	0.834241	0.597354	2.1176	1.87602	1.59286	2.09405	0.286276	0	1.3697	0	0	3.28059	0.579489	1.35971	4.94942	0.51898	1.15564	1.72372	1.52458	1.05381	0	1.46743	0.285291	0	1.33762	2.42188	0.772593	0.901453	3.89698	0.438832	1.70943	0	0.813082	0.514163	0	0.311999	0.893366	0.270645	1.30435	3.14778	0.961073	1.4046	0.740585	0.240576
hsa-miR-511-5p	MIMAT0002808	19.1625	4.87571	24.9067	17.161	41.434	13.7392	16.4114	13.1321	31.8572	75.7347	32.9217	18.6917	64.3761	22.0337	14.7737	20.048	18.5436	17.6762	50.7316	6.22776	19.0681	4.11042	13.4163	12.8564	20.0344	26.2303	7.70285	5.13409	10.701	35.1173	50.9911	20.7334	15.8044	22.3804	27.3508	78.2511	13.8224	5.14163	7.60939	64.5838	13.4005	8.66065	25.4349	8.78754	58.1449	55.1306	11.1088	13.2317
hsa-miR-511-3p	MIMAT0026606	0	0	0	0.677406	2.22464	0	0	1.25068	0	3.49008	0.572552	0	1.82627	0	0	0.72902	1.15898	0	0	1.55694	1.15564	0	1.21966	2.31837	1.48403	0.550287	0.855871	0.558055	0.445874	0.60547	1.15889	0	0.865996	0.219416	4.55847	10.0322	0	1.02833	0	0.779996	1.34005	1.62387	0.652176	0.262315	0.480536	0.35115	0.493724	0.721728
hsa-miR-146b-5p	MIMAT0002809	662.582	489.738	1934.42	979.078	1086.74	612.886	821.099	1393.26	2132.04	3092.21	877.149	657.029	1181.6	1224.45	1078.48	669.969	1252.86	486.096	1536.8	1911.14	677.207	230.316	581.473	865.174	545.195	422.62	597.541	980.053	349.565	1250.9	624.641	1357.59	508.989	582.987	2051.88	3548.72	1082.21	826.26	1056.62	735.537	975.109	1302.07	815.872	184.014	827.964	444.908	366.59	782.113
hsa-miR-146b-3p	MIMAT0004766	56.0136	43.8814	182.649	128.256	261.396	105.732	73.5866	85.6716	129.818	321.785	313.186	59.249	476.885	177.319	93.9185	90.7629	155.303	62.5466	311.814	196.953	71.6498	65.6341	79.278	176.407	129.667	105.288	70.6094	143.531	29.4277	98.9944	120.524	130.711	118.642	105.758	50.713	203.319	56.9157	46.2747	82.0727	152.723	98.717	59.542	73.6959	33.4451	137.914	78.3066	95.0417	177.786
hsa-miR-202-5p	MIMAT0002810	0	1.62524	0.593017	0.225802	0	0	0	0.62534	0	0	0	1.41069	0	0	1.5829	0	2.31796	0	0	0.51898	0.577821	0	0.304915	0	0	0	0	0	0	0.60547	0.386296	0	1.08249	0.438832	0	0.668813	0	0	0	0.623997	0.446683	0	0	0.262315	0	0	0	0.240576
hsa-miR-202-3p	MIMAT0002811	0	0	0	0	0	0	0	0	0	0	0	0	0	0	0	0	0	0	0	0	0	0	0	0	0	0	0	0	0	0	0	0	0	0.219416	0	0	0	0	0	0.311999	0	0	0	0	0	0	0	0
hsa-miR-492	MIMAT0002812	0	0	0	0	0	0	0	0	0	0	0	0	0.228284	0	0	0	0.579489	0	0	0	0	0	0	0	0	0	0	0	0	0	0	0	0	0	0	0.668813	0	0	0	0	0	0.270645	0	0	0	0	0	0
hsa-miR-493-5p	MIMAT0002813	4.42213	4.33397	5.33715	48.0959	8.34241	38.828	6.3528	8.12943	4.77858	6.28214	7.15689	7.40613	6.39195	4.1969	2.11053	5.10314	23.1796	19.7158	7.42413	10.3796	4.62257	1.59113	6.0983	2.73989	7.42014	5.6863	4.7073	5.58053	2.22937	7.56838	9.65741	8.56381	137.044	6.36305	122.509	0.668813	3.25233	2.05665	4.89175	6.86398	17.4206	5.14226	120	4.32819	11.0523	12.2903	8.88702	6.49556
hsa-miR-493-3p	MIMAT0003161	3.6851	2.16698	0.593017	32.2897	4.44929	13.7392	3.1764	9.38011	3.98215	5.23512	3.72159	2.46871	5.47882	0	0.527632	0.72902	11.5898	10.1978	1.23736	4.41133	1.15564	1.06075	3.35407	2.52913	4.26658	4.58573	5.84846	2.67866	0.445874	6.05471	2.31778	4.05654	62.3517	2.41357	105.984	1.33763	4.06541	1.02833	5.43528	2.96399	10.2737	1.08258	160.435	1.18041	3.84429	3.51151	11.3556	4.57095
hsa-miR-432-5p	MIMAT0002814	2.21106	1.08349	3.5581	43.8056	10.0109	24.4915	0	10.0054	2.38929	3.14107	12.5961	3.52673	7.98994	2.09845	1.5829	1.82255	13.9077	2.03956	2.47471	3.63286	1.15564	0.795565	4.87864	1.68609	3.89557	3.30172	2.71026	2.1206	0.891748	3.93556	3.09037	5.85945	246.592	3.07182	37.6074	0.668813	3.25233	1.54249	3.26117	3.11999	43.775	2.9771	75.0002	3.27893	4.32483	2.1069	10.8619	4.33037
hsa-miR-432-3p	MIMAT0002815	0	0	0	0	0	0	0	0	0	0	0	0.352673	0	0	0	0	0	0	0	0	0	0	0	0	0	0.183429	0	0	0	0.302735	0	0	0.649497	0.438831	0	0	0	0	0	0	0	0	0	0	0	0	0	0
hsa-miR-494-5p	MIMAT0026607	0	0	0	0.677406	0	0.597354	0	0	0	0	0	0	0	0	0	0	0	0.679854	0	0.25949	0	0	0	0.210761	0.185504	0.366858	0.142645	0	0	0	0	0	1.29899	0	0	0	0	0	0	0	0.446683	0	3.26088	0.131157	0	0	0.493724	0
hsa-miR-494-3p	MIMAT0002816	2.94808	0	1.18603	8.12888	1.11232	7.16825	1.5882	3.1267	2.38929	0	0.572552	0.705346	0.456568	0	0.527632	0	1.73847	3.39927	1.23736	0.25949	0	0.132594	0.60983	0.843044	0.927518	0.550287	0.427936	0.669664	0	1.51368	1.15889	0.901453	17.1034	0.658247	19.3735	0	0	0	0	0.779997	2.6801	0	15.6522	0.131157	0.961073	2.1069	0.493724	0.481152
hsa-miR-495-5p	MIMAT0022924	0	0	0	0.903208	0.27808	0.597354	0.5294	0	0	0	0	0	0.228284	0	0	0	0	0.679854	0	0	0	0.132594	0	0	0	0	0.142645	0	0.445874	0	0.772593	0	0.216499	0	1.13962	0	0	0	0	0	0	0.270645	2.6087	0.131157	0	0.7023	0.246862	0.240576
hsa-miR-495-3p	MIMAT0002817	2.21106	2.16698	4.15112	29.3543	9.45473	23.8942	3.1764	22.5123	5.57501	6.28214	6.58434	3.8794	6.16367	2.09845	3.69342	2.91608	9.27183	8.15825	3.71207	5.96827	4.62257	0.795565	3.9639	2.95065	4.26658	4.03544	3.56613	2.34382	1.33762	6.35744	3.09037	3.15509	128.817	2.8524	41.0262	0	0.813082	0	8.69644	3.43199	54.4954	1.89452	57.3915	1.70504	4.80536	3.5115	4.93723	3.36807
hsa-miR-496	MIMAT0002818	3.6851	0	1.18603	27.5479	1.11232	4.77884	1.5882	3.1267	0.79643	2.09405	2.57648	2.11604	2.28284	0	0.527632	1.09353	4.05642	2.71942	1.23736	0.77847	0.577821	0.132594	0.914745	0.843044	2.59705	0.917145	1.28381	0.892886	0.445874	2.11915	0	1.35218	29.8769	0.658247	27.9206	0.668813	0	0	1.63058	0.779997	12.0604	0	61.9567	0.524629	0	2.8092	1.9749	1.92461
hsa-miR-193b-5p	MIMAT0004767	2.94808	6.50095	1.77905	10.8385	4.72737	5.97354	4.2352	7.50408	0	3.14107	16.0314	4.58475	12.3273	2.09845	6.85922	15.6739	4.63591	9.51796	25.9845	7.26572	1.15564	3.58004	8.53763	19.1793	10.5737	28.4315	4.84994	2.90188	1.7835	5.44923	1.15889	3.15509	2.16499	2.8524	10.8264	6.01931	5.69157	16.4532	7.06586	7.79997	5.3602	3.24774	3.91306	6.16439	4.80536	41.7869	4.69037	4.57095
hsa-miR-193b-3p	MIMAT0002819	56.7506	99.1395	36.174	142.03	52.5572	78.8508	64.0574	63.7847	34.2465	50.6061	346.394	67.3605	118.936	16.7876	89.6975	309.469	64.3233	209.395	316.763	113.138	33.5136	61.9215	251.86	487.49	364.514	646.954	70.8947	43.4166	23.6313	104.141	21.6326	41.4668	26.4129	26.5493	113.962	94.9714	63.4204	154.249	75.0068	56.0038	41.5415	42.4913	23.4783	117.123	31.7154	424.19	66.8995	46.6718
hsa-miR-497-5p	MIMAT0002820	15.4774	17.8776	17.7905	26.8705	40.0436	25.6862	14.2938	13.7575	19.1143	21.9875	29.7727	14.1069	31.7315	13.6399	4.74869	12.3933	24.918	31.2733	22.2724	28.0249	12.1342	12.9942	17.6851	25.5021	29.4951	9.72174	21.6821	7.36631	9.36336	21.7969	15.4519	18.9305	15.5879	15.5785	1.70943	4.68169	3.25233	4.62747	29.3505	14.5079	24.5676	16.5094	15	6.16439	3.36375	11.9391	26.6611	18.2838
hsa-miR-497-3p	MIMAT0004768	2.94808	0	2.96508	0.903208	1.66848	1.79206	0	1.87602	1.59286	1.74504	0.572552	0.705345	0.228284	0	0.527632	1.45804	1.15898	1.35971	0	1.03796	1.15564	0.397783	0.60983	0.210761	0.556511	0.183429	0.998518	0	0	0.60547	1.15889	0.450727	0	0.219416	0.569809	1.33763	0	1.02833	0.543528	0	0	2.43581	3.91305	0	0	0.35115	0.740585	0.721728
hsa-miR-181d-5p	MIMAT0002821	19.1625	10.2932	13.0464	8.35468	11.1232	15.5312	2.1176	10.0054	5.57501	6.98016	13.7412	43.3787	14.6102	4.1969	11.0803	15.6739	7.53336	11.5575	0	18.6833	5.20039	53.3029	9.75729	18.7577	32.4631	16.1418	13.266	20.2015	32.1029	5.75197	3.47667	15.7754	54.5578	30.2793	10.2566	7.35694	2.43925	239.6	33.1552	13.26	30.8211	15.6974	12.3913	8.26291	17.7798	5.96956	34.8075	18.0432
hsa-miR-181d-3p	MIMAT0026608	0	0	0	0.225802	0	0	0	0	0	0	0	0.705345	0	0	0	0	0	0	0	0	0	0.132594	0	0	0.185504	0.183429	0	0	0.445874	0	0	0	0.649497	0	0	0	0	0	0	0	0	0	0	0	0	0.35115	0	0
hsa-miR-512-5p	MIMAT0002822	0	0	2.37207	0	0	1.79206	0	0.62534	0	0	0	0	0	0	0	0	0	0	0	0.51898	0	0	0	0	0	0	0	0.111611	0.445874	0	0	0	0	0	0	0	759.418	0	0.543528	0	0	0	0	0	0	0	0	0
hsa-miR-512-3p	MIMAT0002823	0	0	1.18603	0.225802	0.55616	8.36296	0.5294	5.00272	0	0.349008	0	0	0.456568	0	0.527632	0.36451	0	0.679854	0	5.1898	0	0	0.304915	0.421522	0.371008	0	0.142645	0.892886	0.891748	0.302735	0	0	0.216499	0.438832	1.13962	0	8791.04	1.54249	7.60939	0.311998	0.446683	0.270645	0	0	0	0.702301	0	0
hsa-miR-498	MIMAT0002824	0	0	0	0	0	0	0	0.62534	0	0	0	0	0	0	0	0	0	0	0	0.51898	0	0	0	0	0	0	0	0	0	0	0	0	0	0	0	0	136.598	0	0.543528	0	0	0	0	0	0	0	0	0
hsa-miR-520e	MIMAT0002825	0	0	0	0	0	1.79206	0	0	0	0	0	0	0	0	0	0	0	0	0	1.03796	0	0	0	0	0	0	0	0.111611	0	0	0	0	0	0	0	0	808.203	0	0.543528	0	0	0	0	0	0	0	0	0
hsa-miR-515-5p	MIMAT0002826	0	0	0	0	0	0.597354	0	0	0	0	0	0	0	0	0	0	0	0	0	0	0	0	0	0	0.185504	0	0.142645	0.223222	0	0	0	0	0	0	0	0	95.9436	0	1.08706	0	0	0	0	0	0	0	0	0
hsa-miR-515-3p	MIMAT0002827	0	0	0.593017	0	0	1.19471	0	1.25068	0	0	0	0	0	0	0	0	0	0	0	1.29745	0	0	0	0	0	0	0	0	0	0	0	0	0	0	0	0.668813	424.429	0	2.17411	0	0	0	0	0	0	0	0	0
hsa-miR-519e-5p	MIMAT0002828	0	0	0	0	0	0	0	0	0	0	0	0	0	0	0	0	0	0	0	0.25949	0	0	0	0	0	0	0	0	0	0	0	0	0	0	0	0	8.9439	0	0	0	0	0	0	0	0	0	0	0
hsa-miR-519e-3p	MIMAT0002829	0	0	0	0	0	0	0	0	0	0	0	0	0	0	0	0	0	0	0	0	0	0	0	0	0	0	0	0	0	0	0	0	0	0	0	0	32.5233	0	0	0	0	0	0	0	0	0	0	0
hsa-miR-520f-5p	MIMAT0026609	0	0	0	0	0	0	0	0.62534	0	0	0	0	0	0	0	0	0	0	0	0	0	0	0	0	0	0	0	0	0	0	0	0	0	0	0	0	56.1026	0	0	0	0	0	0	0	0	0	0	0
hsa-miR-520f-3p	MIMAT0002830	0	0	0	0	0	2.98677	0	0	0	0	0	0	0	0	0	0	0	0.679854	0	0	0	0	0	0.210761	0.185504	0	0	0.223221	0	0	0	0	0	0	0	0	738.278	0	2.17411	0	0	0	0	0	0	0.702301	0	0
hsa-miR-519c-3p	MIMAT0002832	0	0	0	0	0.27808	6.5709	0	0.62534	0	0	0	0	0	0	0	0	0	0	0	1.03796	0	0	0	0	0	0	0	0	0	0	0.386296	0	0	0	0	0	400.849	0	1.63058	0	0	0	0	0	0	0	0	0
hsa-miR-520a-5p	MIMAT0002833	0	0	1.18603	0	0	5.37619	0	1.25068	0	0	0.286276	0	0	0	0	0	0	0.679854	0	2.33541	0.577821	0	0	0.210761	0.185504	0	0	0.223221	0	0	0	0	0	0	0	0	3127.11	0.514163	4.89175	0.155999	0	0	0	0	0	0	0	0
hsa-miR-520a-3p	MIMAT0002834	0	0	1.18603	0	0.556161	3.58413	0	3.75204	0	0.349008	0.286276	0	0	0	0	0	0	0	0	2.07592	0	0.132594	0	0	0	0.183429	0	1.22772	0	0	0	0	0	0	0.569809	0	3653.18	0	4.89175	0	0	0	0	0	0	0	0	0
hsa-miR-526b-5p	MIMAT0002835	0	0	4.15112	0.903208	0.27808	37.6333	0	1.25068	0	0.349008	0	0	0	0	2.11053	1.09353	0.579489	0.679854	0	15.3099	0	0	0	0.210761	0	0	0	3.23671	0.445874	0	0.386296	0	0.216499	0	0.569809	0	11040.8	0	20.1105	0	0	0	0	0	0	0.35115	0	0
hsa-miR-526b-3p	MIMAT0002836	0	0	0	0	0	0.597354	0	0	0	0	0	0	0	0	0	0	0	0	0	0.25949	0	0	0	0	0	0	0	0	0	0	0	0	0	0	0	0	82.9343	0	0	0	0	0	0	0	0	0	0	0
hsa-miR-519b-3p	MIMAT0002837	0	0	0	0	0	0.597354	0	0.62534	0	0	0	0	0	0	0	0	0	0	0	0	0	0	0	0	0	0	0	0.111611	0	0	0	0	0	0	0	0	173.999	0	0.543528	0	0	0	0	0	0	0	0	0
hsa-miR-525-5p	MIMAT0002838	0	0	0.593017	0	0	4.18148	0	0	0	0	0.286276	0	0	0	0	0	0	0	0	0.25949	0	0	0	0	0	0	0	0.446443	0	0	0	0	0	0	0	0	1292.8	0	0.543528	0	0	0	0	0	0	0	0	0
hsa-miR-525-3p	MIMAT0002839	0	0	0	0	0	0	0	0.62534	0	0	0	0	0	0	0	0	0	0	0	0.51898	0	0	0	0	0.185504	0	0	0	0	0	0	0	0	0	0	0	282.952	0	2.71764	0	0	0	0	0	0	0	0	0
hsa-miR-523-3p	MIMAT0002840	0	0	0	0	0	0.597354	0	0	0	0	0	0	0	0	0	0	0	0.679854	0	0.25949	0	0	0	0	0	0	0	0	0	0	0	0	0	0	0	0	292.709	0	0	0	0	0	0	0	0	0	0	0
hsa-miR-518f-5p	MIMAT0002841	0	0	0	0.225802	0.556161	10.7524	0	0	0	0.349008	0	0	0	0	0	0	0	0	0	1.29745	0	0	0	0	0	0	0	0.111611	0	0	0.386296	0	0	0	0	0	3233.63	0	3.26117	0.155999	0	0	0	0	0	0	0	0
hsa-miR-518f-3p	MIMAT0002842	0	0	0	0.225802	0	1.79206	0	0	0	0	0	0	0	0	0	0	0	0	0	0.25949	0	0	0	0	0	0	0	0	0.445874	0.302735	0	0	0	0	0	0	303.279	0	1.08706	0	0	0	0	0	0	0	0	0
hsa-miR-520b	MIMAT0002843	0	0	0	0	0	1.19471	0	0	0	0	0	0	0	0	0	0	0	0	0	0.25949	0	0	0	0	0	0	0	0	0	0	0	0	0	0	0.569809	0	648.026	0	1.63058	0	0	0	0	0	0	0	0	0
hsa-miR-518b	MIMAT0002844	0	0.541746	0	0	0	3.58413	0.5294	0	0	0	0	0	0.228284	0	0	0	0	2.03956	0	0.51898	0	0	0	0.421522	0.371007	0	0	0.446443	0.891748	0	0	0	0.432998	0	0	0	1945.7	0	7.06586	0	0	0	0	0	0	0	0	0
hsa-miR-520c-3p	MIMAT0002846	0	0	0	0	0	1.19471	0	0	0	0.349008	0	0	0	0	0	0	0	0	0	0.25949	0	0	0	0	0	0	0	0	0	0	0	0	0	0	0.569809	0	652.904	0	1.08706	0	0	0	0	0	0	0	0	0
hsa-miR-518c-5p	MIMAT0002847	0	0	2.37207	0	0	3.58412	0	0.62534	0	0	0	0	0	0	0	0	0	0	0	1.55694	0	0	0	0	0	0	0	0.781275	0	0	0	0	0	0.219416	0	0.668813	2356.31	0.514163	3.80469	0	0	0	0	0	0	0	0	0
hsa-miR-518c-3p	MIMAT0002848	0	0	0	0	0.27808	1.19471	0	0	0	0	0	0	0	0	0	0	0	0	1.23736	1.03796	0	0	0	0	0.371008	0	0	0.223222	0	0	0.386296	0	0	0	0	0	176.439	0	3.26117	0	0	0	0	0	0	0	0	0
hsa-miR-524-5p	MIMAT0002849	0	0	0	0	0	1.79206	0	0	0	0	0	0	0	0	0	0	0	0	0	0.51898	0	0	0	0	0	0	0	0.334833	0	0	0	0	0	0	0	0	79.682	0	1.08706	0	0	0	0	0	0	0	0	0.240576
hsa-miR-524-3p	MIMAT0002850	0	0	0	0	0	0	0	0	0	0	0	0	0	0	0	0	0	0	0	0	0	0	0	0	0	0	0	0	0	0	0	0	0	0	0	0	75.6166	0	0.543528	0	0	0	0	0	0	0	0	0
hsa-miR-517-5p	MIMAT0002851	0	0	0	0	0	0	0	0	0	0	0.858828	0	0	0	0	0	0	0	0	0	0	0	0	0	0	0	0	0.334833	0	0	0	0	0.649497	0	0	0	387.84	0	1.63058	0	0	0	0	0	0	0	0	0
hsa-miR-517a-3p	MIMAT0002852	0	0	0	0	0	5.37619	0	0	0	0.698016	0	0	0	0	0	0	0	0.679854	0	2.5949	0	0	0	0.210761	0.371008	0	0	1.67416	0	0.302735	0	0	0	0	2.27923	1.33763	1174.09	0	4.89175	0	0	0	0.652176	0	0	0	0.246862	0
hsa-miR-519d-5p	MIMAT0026610	0	0	0	0	0	0	0	0	0	0	0	0	0	0	0	0	0	0	0	0	0	0	0	0	0	0	0	0	0	0	0	0	0	0	0	0	17.0747	0	0	0	0	0	0	0	0	0	0	0
hsa-miR-519d-3p	MIMAT0002853	0	0	0	0	0	1.19471	0	0	0	0	0	0	0	0	0	0	0	0	0	0.25949	0	0	0	0	0.185504	0	0	0.223222	0	0	0.386296	0	0.216499	0	0	0.668813	218.719	0	1.08706	0	0	0	0	0	0	0	0	0
hsa-miR-521	MIMAT0002854	0	0	0	0	0	0	0	0	0	0	0	0	0.228284	0	0	0	0	0	0	0	0	0	0	0	0	0	0	0	0	0	0	0	0	0	1.13962	0	4.87849	0	0.543528	0.623997	0	0	0	0	0	1.4046	0	0
hsa-miR-520d-5p	MIMAT0002855	0	0	0	0	0	1.19471	0	0	0	0	0	0	0	0	0	0	0	0	0	0	0	0	0	0	0	0	0	0	0	0	0	0	0	0	0	0	34.9625	0	0	0	0	0	0	0	0	0	0	0
hsa-miR-520d-3p	MIMAT0002856	0	0	0.593017	0.225802	0	1.19471	0.5294	0	0	0	0	0	0	0	0	0	0	0	0	0.25949	0	0	0	0	0	0	0	0.223222	0.445874	0	0	0	0	0	0	0	316.289	0	1.08706	0	0	0	0	0	0	0	0	0
hsa-miR-517b-3p	MIMAT0002857	0	0	0	0	0	5.37619	0	0	0	0.698016	0	0	0	0	0	0	0	0.679854	0	2.5949	0	0	0	0.210761	0.371008	0	0	1.67416	0	0.302735	0	0	0	0	2.27923	1.33763	1174.09	0	4.89175	0	0	0	0.652176	0	0	0	0.246862	0
hsa-miR-520g-5p	MIMAT0026611	0	0	0	0	0	0	0	0	0	0	0	0	0	0	0	0	0	0	0	0	0	0	0	0	0	0	0	0	0	0	0	0	0	0	0	0	52.8503	0	0	0	0	0	0	0	0	0	0	0
hsa-miR-520g-3p	MIMAT0002858	0	0	0	0	0	2.98677	0	0	0	0	0	0	0	0	0	0	0	0	0	1.03796	0	0	0	0	0	0	0	0.111611	0	0	0	0	0	0	0.569809	0	348.812	0	4.34822	0	0	0	0	0	0	0.35115	0	0
hsa-miR-516b-5p	MIMAT0002859	0	0	0.593017	0.225802	0	1.19471	0	0	0	0.349008	0.286276	0	0.456568	0	0	0	0	0.679854	0	1.29745	0	0.132594	0	0	0.185504	0	0	0.446442	0.891748	0	0	0	0.216499	0	0.569809	0	1508.27	0	5.97881	0	0	0	0	0	0	0	0	0
hsa-miR-518e-3p	MIMAT0002861	0	0	0	0.225802	0	1.79206	0.5294	0.62534	0	0	0	0	0	0	0	0	0	0.679854	0	0	0	0	0	0	0	0	0	0.558053	0	0	0.386296	0	0	0	0	0	439.877	0	0.543528	0.155999	0	0	0	0	0	0	0	0
hsa-miR-518a-5p	MIMAT0005457	0	0	0	0	0.27808	0.597354	0	0.62534	0	0	0	0	0	0	0	0	0	0	0	0	0	0.132594	0	0	0	0	0	0	0	0	0	0	0	0	0	0	265.878	0	1.08706	0	0	0	0	0	0	3.86265	0	0
hsa-miR-518a-3p	MIMAT0002863	0	0	0	0.225802	0	2.38942	0	0	0	0	0.286276	0	0.228284	0	0	0	0	0	0	0	0	0	0	0	0	0	0	0.111611	0	0	0	0	0	0.219416	0	0.668813	366.7	0	0	0	0	0	0	0	0	0	0	0
hsa-miR-518d-3p	MIMAT0002864	0	0	0	0	0	0	0	0	0	0	0	0	0	0	0	0	0	0	0	0	0	0	0	0	0	0	0	0.111611	0	0	0	0	0	0	0	0	7.31773	0	0	0	0	0	0	0	0	0	0	0
hsa-miR-517c-3p	MIMAT0002866	0	0	0	0	0	0	0	0	0	0	0	0	0	0	0	0	0	0	0	0	0	0	0	0	0	0	0	0.111611	0	0	0	0	0	0	0.569809	0	70.7381	0	0	0	0	0	0	0	0	0	0	0
hsa-miR-520h	MIMAT0002867	0	0	0	0.225802	0	1.19471	0	0	0	0	0	0	0	0	0	0	0	0	0	0.77847	0	0	0	0	0	0	0	0	0	0	0	0.450727	0	0	0.569809	0	161.803	0	2.71764	0	0	0	0	0	0	0.35115	0	0
hsa-miR-522-3p	MIMAT0002868	0	0	0	0	0	0	0	0.62534	0	0	0.286276	0	0	0	0	0	0	0	1.23736	0	0	0.132594	0	0	0	0	0.142645	0.111611	0	0	0	0	0	0	0.569809	0	165.869	0	2.71764	0	0	0.811936	0	0	0	6.32071	0	0
hsa-miR-519a-5p	MIMAT0005452	2.94808	0	2.96508	0.451604	1.3904	8.96031	1.0588	1.87602	0.79643	1.04702	2.00393	0	2.05456	1.04923	0.527632	3.28059	0.579489	1.35971	13.6109	6.48724	0.577821	0.397783	0.914745	1.68609	0.371008	0	0	0.781275	1.33762	0.908206	0	1.35218	0	0.219416	6.2679	0	4259.73	0	20.654	1.404	1.34005	3.78904	0	0	0	30.9012	0.246862	0
hsa-miR-519a-3p	MIMAT0002869	0	0	0	0.225802	0	0.597354	0.5294	0	0	0.349008	0	0	0.228284	0	0	0	0	0	0	0.25949	0	0	0	0.210761	0	0	0	0.558054	0	0	0	0	0	0	0.569809	0.668813	219.532	0	2.71764	0.155999	0.446683	0.541291	0	0	0	9.12991	0	0
hsa-miR-527	MIMAT0002862	0	0	0	0	0.27808	0.597354	0	0.62534	0	0	0.286276	0	0	0	0	0	0	0	0	0	0	0.132594	0	0	0	0	0	0	0	0	0	0	0	0	0	0	259.373	0	1.08706	0	0	0	0	0	0	4.2138	0	0
hsa-miR-516a-5p	MIMAT0004770	0	0	1.18603	1.12901	0.834241	4.18148	0	0.62534	0.79643	0	1.43138	0	2.05456	0	1.5829	0.36451	0	0.679854	6.18678	2.5949	0	0.530376	0.60983	1.68609	1.48403	0	0	2.45544	2.22937	0	0	0	0.216499	0.438832	3.41885	2.00644	885.446	1.02833	8.69644	1.56	0.446683	1.08258	0	0.131157	1.92214	87.4365	0	0.240576
hsa-miR-499a-5p	MIMAT0002870	1.47404	0	0	0	0	0.597354	0	0	0	0	0	0	0	0	1.05526	1.09353	0	0.679854	1.23736	0	0	0.662971	0	0.210761	0.185504	0.183429	0.142645	0	1.7835	0	0	0	0	0.438832	1.13962	0	0	0.514163	487.544	0.311999	0	0.541291	0	0.918101	0.480536	0.35115	0.740585	0
hsa-miR-499a-3p	MIMAT0004772	1.47404	0	1.18603	0.677406	0	0	0	0	0.79643	0.698016	0	0.352673	0.228284	0	0	0.729019	0	0.679854	0	0.51898	0.577821	0.265188	0	1.05381	0	0	0	0.111611	0.445874	0.302735	0	0	0.216499	0	0	0	0	0	141.861	0	0	1.62387	0	0	0	0	0.246862	0
hsa-miR-500a-5p	MIMAT0004773	0.737021	3.79222	8.30223	4.29024	5.00545	8.36296	4.2352	4.37738	4.77858	2.44306	6.01179	3.17406	3.19598	4.1969	2.11053	3.28059	8.11285	6.79854	18.5603	1.55694	7.51168	3.18226	5.18356	3.37218	7.42014	4.03544	2.13968	5.35731	4.01287	3.33009	6.56704	2.25363	1.08249	3.51065	3.41885	3.34406	5.69157	4.62747	4.89175	0.935997	4.91352	5.68355	1.30435	1.57389	1.44161	2.1069	3.2092	3.12749
hsa-miR-500a-3p	MIMAT0002871	80.3353	157.106	351.066	240.931	282.53	386.488	206.466	244.508	322.554	182.182	243.048	131.547	244.949	527.76	235.852	259.166	539.504	224.352	601.355	151.283	776.014	141.478	576.595	159.335	137.273	163.802	130.235	129.692	181.025	178.917	419.904	206.883	205.891	166.536	122.509	48.1545	567.531	232.916	569.073	146.171	236.295	240.874	86.0872	118.304	322.92	177.331	152.56	165.998
hsa-miR-501-5p	MIMAT0002872	0.737021	0.541746	1.18603	5.19345	3.61504	3.58413	1.5882	0	4.77858	3.14107	4.00786	2.11604	2.28284	3.14768	1.05526	2.55157	8.69234	4.07912	9.89885	2.07592	6.35603	2.2541	5.18356	4.8475	5.3796	2.38458	2.56761	2.23221	2.22937	0.908206	3.86296	1.35218	2.59799	3.29123	3.41885	2.67525	6.50465	3.08498	5.9788	1.55999	1.78673	4.33032	3.26088	2.22967	0.961072	1.75575	4.69037	3.60864
hsa-miR-501-3p	MIMAT0004774	19.8996	46.5901	76.4992	68.6438	78.6968	97.3688	33.3522	60.0327	82.0323	37.3438	43.5139	31.0352	43.374	130.104	85.4764	60.5086	233.534	53.0286	272.218	37.107	154.278	33.8115	59.7634	34.1433	33.5761	28.0646	18.4012	24.5544	37.8993	32.0899	73.3963	45.5234	41.5678	37.9589	39.8866	18.0579	138.224	65.8128	153.275	36.6599	71.916	41.1381	14.3479	49.184	117.251	34.7639	27.8954	26.9445
hsa-miR-502-5p	MIMAT0002873	0	0.541746	0	1.12901	0.55616	0.597354	1.0588	0.62534	0.79643	0.698016	0.572552	0.705346	1.82627	0	1.5829	1.45804	2.31796	1.35971	3.71207	0.25949	3.46693	0.132594	2.74424	1.47533	2.22604	0.550287	0.855871	0.892886	0.891748	1.81641	0.386296	0	0.649497	0	0.569809	0	0.813082	1.02833	0	0.311998	1.34005	1.35323	0	0.262315	0.961072	0.35115	0.740586	0.962304
hsa-miR-502-3p	MIMAT0004775	6.63319	9.75143	11.8603	8.58048	10.289	11.9471	8.4704	5.62806	8.76073	8.7252	13.455	8.11148	15.295	12.5907	10.025	11.6643	18.5437	6.11869	11.1362	5.1898	21.9572	4.5082	13.4163	18.1254	15.9533	8.62116	13.266	9.04047	5.79636	6.96291	16.997	7.21162	4.76298	9.8737	10.8264	13.3763	10.5701	9.7691	20.1105	8.26797	9.82703	11.6378	11.7392	3.14777	4.80536	9.12991	8.14643	5.29268
hsa-miR-450a-2-3p	MIMAT0031074	0	0	0	0	0	0.597354	0	0	0	0	0	0	0	0	0	0	0	0	1.23736	0	0	0	0	0	0	0	0	0.111611	0	0.60547	0	0	0	0	0	0	0	0	0	0	0.446683	0.270645	0.652176	0	0	0	0	0
hsa-miR-503-5p	MIMAT0002874	33.1659	6.50095	8.89525	19.419	8.62049	41.8148	6.3528	8.75477	6.37144	4.88611	2.29021	8.46415	9.35964	4.1969	15.829	14.2159	12.7488	7.47839	24.7471	16.6073	12.7121	2.12151	2.43932	4.8475	6.67813	4.4023	5.56317	9.3753	13.3762	8.47659	5.79445	4.95799	0.649497	2.41357	41.0262	27.4213	14.6355	7.71244	14.1317	4.21199	8.0403	19.2158	24.1305	4.06588	5.2859	5.96956	5.67782	4.81152
hsa-miR-503-3p	MIMAT0022925	0	1.08349	1.18603	3.16123	0.83424	4.18148	0.5294	1.87602	2.38929	0.698016	0.572552	0.705346	2.05456	3.14768	3.69342	1.09353	0	0.679854	9.89885	1.03796	1.15564	0.265188	0.914745	0.632283	1.11302	1.284	0.142645	0.446443	0.445874	0.60547	0.386296	0.901454	0	1.09708	1.13962	0.668813	2.43925	1.02833	1.08706	1.092	0.893366	0.811936	3.91305	1.96736	0.961072	1.05345	0.740585	0.240576
hsa-miR-504-5p	MIMAT0002875	0	1.62524	0	0	1.11232	0	1.0588	0	0	0.698016	1.43138	0.352673	0.684852	3.14768	0	8.38372	0	2.71942	0	0.51898	1.73346	0.265188	0	1.89685	0	1.284	0.427936	1.0045	4.45874	0.302735	5.79444	0	4.76298	6.14364	0	3.34406	0.813082	4.1133	4.34822	0	1.34005	0.811936	0	0.393471	0.961072	0	0.246862	0.962305
hsa-miR-504-3p	MIMAT0026612	0	0	0	0	0	0	0	0	0	0	0	0	0	0	0	0	0	0.679854	0	0	0.577821	0	0	0	0	0	0	0.223221	0	0	0	0.450727	0.216499	0.877663	0	0.668813	0	0.514163	0	0	0	0	0	0	0	0	0	0.481152
hsa-miR-505-5p	MIMAT0004776	1.47404	9.75143	10.0813	7.67727	8.06433	14.9339	4.7646	5.62806	3.98215	6.98016	5.72552	5.64276	5.02225	11.5415	11.6079	33.5349	8.69234	14.2769	55.681	12.715	15.6012	8.08825	5.18356	8.00892	8.71867	5.31944	2.71026	3.01349	25.8607	6.66018	10.8163	4.95799	9.09296	19.9668	17.6641	17.3891	5.69157	44.7322	26.0893	6.39598	14.7405	10.5552	1.95653	7.86944	23.5463	4.56496	10.1213	6.25498
hsa-miR-505-3p	MIMAT0002876	57.4876	39.0057	63.4528	29.8059	38.6532	85.4217	35.9992	35.0191	35.8394	44.673	47.8081	31.3879	44.7437	54.5597	34.8237	165.487	29.5539	60.507	133.634	62.537	58.9378	66.1645	37.5046	86.2012	100.543	53.3778	32.0952	23.6615	94.0795	35.1173	61.0348	20.7334	119.507	95.8846	83.1921	63.5372	20.327	80.7236	113.597	33.2279	53.1553	70.9091	30.0001	46.4297	101.393	40.7335	70.1087	48.3558
hsa-miR-513a-5p	MIMAT0002877	0	0.541746	0	0	0	0	0	0	0	0	0	0	0.684852	0	0	2.55157	0	10.8777	0	0	0.577821	0	0	11.3811	0.185504	0	0	0.111611	0	0	0.386296	0	0	0	0	0	0	0	0	1.09199	0	0	0	0	0	0	0	0
hsa-miR-513a-3p	MIMAT0004777	0	0	0	0	0	0	0	0	0	0	0	0	0	0	0	1.09353	0	0	1.23736	0	0	0	0	1.47533	0	0	0	0	0	0	0	0	0	0	0	0	0	0	0.543528	0	0	0.54129	0	0	0	0	0	0
hsa-miR-506-5p	MIMAT0022701	0	0	0	0	0	0	0	0	0	0	0	0	0	0	0	0	0	0	0	0	0	0	0	0.210761	0	0	0	0	0	0	0	0	0	0	0	0	0	0	0	0	0	0	0	0.131157	0	0	0	0
hsa-miR-506-3p	MIMAT0002878	0	6.50095	0.593017	0	0.556161	0	0	0	0.79643	0.349008	1.71765	0.352673	0.913136	0	0.527632	9.84176	0	29.9136	1.23736	1.29745	0	0.132594	0	50.1611	0.556511	0	0	1.33933	3.12112	2.42188	0.386296	0	1.29899	0.438832	1.13962	0	0	0	0.543528	2.02799	0	0	0	0	2.40268	0	0	0.481152
hsa-miR-507	MIMAT0002879	0	1.08349	0	0	0.27808	0	0	0	0	0	0.572552	0	0.456568	0	0	1.09353	0	10.8777	1.23736	0	0	0	0	13.9102	0	0	0	0.334832	1.33762	0.302735	0	0	0	0	0	0	0	0	0	0	0	0	0	0	0	0	0	0.240576
hsa-miR-508-5p	MIMAT0004778	0	7.0427	0.593017	0.451604	0.27808	0	0.5294	0	0.79643	0	3.72159	0	2.73941	0	0	16.4029	1.15898	48.2696	4.94942	0.778469	0	0	0.304915	68.2866	0	0	0	1.45094	1.7835	1.81641	0.772593	0.901454	2.16499	0.658247	0	0	1.62616	0	0.543528	3.58799	0.446683	0.270645	0	3.6724	10.5718	0	0	0.962304
hsa-miR-508-3p	MIMAT0002880	6.63319	370.554	37.3601	15.3545	18.6314	12.5444	15.3526	8.75477	76.4573	11.8663	133.118	5.29009	95.651	27.2799	15.3013	645.547	12.1693	1378.06	147.245	22.8351	13.8677	1.59113	11.5868	1838.47	8.71867	1.284	3.42349	51.2293	148.03	132.901	19.3148	7.66235	55.2073	12.7261	0.569809	2.67525	20.327	10.7974	63.0492	103.74	7.59361	29.5003	8.47828	66.4967	162.421	0.35115	2.71548	35.6053
hsa-miR-509-5p	MIMAT0004779	0	0	0	0	0	0	0	0	0	0	0	0	0	0	0	0	0	0.679854	0	0	0	0	0.304915	2.52913	0	0	0	0	0.445874	0	0	0	0	0	0	0	0	0	0	0.623997	0	0	0	0.131157	0.480536	0	0	0
hsa-miR-509-3p	MIMAT0002881	5.89617	131.644	11.2673	7.67727	5.83969	5.97354	8.4704	3.75204	16.725	10.8192	71.569	2.46871	30.1335	6.29535	10.025	240.941	2.89744	448.704	39.5954	9.34163	9.82296	0.928159	3.35406	880.77	2.96806	0.917145	0.28529	27.5678	53.059	36.0255	8.49852	3.60581	18.1859	4.82715	1.70943	2.67525	11.3831	7.19828	21.1976	35.5679	10.2737	8.9313	6.52176	25.9691	63.9113	0	0.987448	14.4346
hsa-miR-510-5p	MIMAT0002882	0	0	0	0	0	0	0	0	0	0	0.286276	0	0	0	0	0	0	0	0	0	0	0	0	0.210761	0	0	0	0	0	0	0	0	0	0	0	0	0	0	0	0	0	0	0	0	0	0	0	0
hsa-miR-510-3p	MIMAT0026613	0	0	0	0	0	0	0	0	0	0	0	0	0	0	0	0.36451	0	0	0	0.25949	0	0	0	0.632283	0	0	0	0	0	0	0	0	0	0	0	0	0	0	0	0	0	0	0	0	0	0	0	0
hsa-miR-514a-5p	MIMAT0022702	0	2.70873	0	0	0	0	0	0	0	0	0.858828	0	0.456568	0	0	2.55157	0	8.15825	2.47471	0	0	0.132594	0	14.5425	0	0	0	0.111611	1.33762	0.302735	0	0	0	0.219416	0	0	0	0	0	0.311998	0	0.811935	0	0.131157	2.40268	0	0	0
hsa-miR-514a-3p	MIMAT0002883	1.47404	122.435	16.6045	4.51604	5.00545	2.38942	8.4704	0.62534	37.4322	4.5371	54.3924	1.76336	37.2103	6.29535	5.80395	216.519	1.15898	606.43	48.2569	6.22776	5.77821	0.530376	8.84254	834.192	6.12162	1.284	1.5691	30.8046	72.2316	66.299	4.63556	5.40872	27.2789	5.7048	1.70943	0.668813	18.7009	7.19828	19.567	69.8877	6.70025	6.76613	6.52176	17.3128	70.1583	0.35115	0.246862	22.8547
hsa-miR-532-5p	MIMAT0002888	313.971	613.256	942.304	632.698	823.396	999.971	950.273	622.839	1068.01	548.64	1431.95	732.501	1572.65	1552.85	838.935	926.219	1451.62	736.282	1153.22	537.403	2042.6	721.843	1360.53	1120.19	750.547	697.947	715.651	730.157	627.345	566.115	2096.43	718.007	288.377	417.548	526.503	273.544	1702.59	1014.44	1492.53	425.878	846.465	798.674	738.263	310.843	637.191	275.302	904.995	721.969
hsa-miR-532-3p	MIMAT0004780	15.4774	24.3786	36.174	41.096	48.386	66.3063	23.2936	28.1403	27.8751	26.8736	65.2709	23.6291	69.3983	38.8213	35.879	43.3767	94.4567	53.7085	118.786	19.2022	110.942	25.1929	63.1175	52.2687	54.538	45.8572	23.6791	23.9963	24.0772	15.4395	103.914	14.874	22.9489	37.7395	4.55847	7.35694	30.8971	35.4772	63.5927	33.6959	26.3543	49.2575	21.5218	25.838	45.1704	36.5196	33.3263	28.388
hsa-miR-455-5p	MIMAT0003150	28.0068	41.1727	14.8254	23.2576	43.1025	47.7884	33.3522	15.0082	43.8037	27.5716	50.3845	25.7451	70.5397	10.4923	10.025	8.01921	17.3847	86.3415	35.8833	58.9042	34.0915	21.7455	22.5637	38.9908	41.5528	137.755	43.2215	27.0098	18.7267	26.6407	17.3833	22.5363	9.30946	32.0347	37.0376	26.0837	47.9718	16.9674	23.9152	7.79997	21.4408	24.6287	33.261	3.6724	16.8188	40.3823	49.1255	48.1152
hsa-miR-455-3p	MIMAT0004784	671.426	858.125	272.788	454.54	398.489	516.114	588.693	273.899	520.865	349.706	337.805	219.01	709.963	385.066	146.154	232.922	178.483	1439.25	732.515	1059.76	703.208	227.001	178.68	260.922	273.618	1284.37	282.438	146.88	288.926	302.735	171.129	320.917	106.085	362.694	764.113	382.561	1561.12	389.221	230.456	54.5998	414.075	549.681	815.22	64.9229	167.227	505.306	483.108	496.309
hsa-miR-539-5p	MIMAT0003163	8.10723	2.70873	8.30223	59.6118	9.73281	30.4651	8.9998	13.1321	8.76073	4.18809	3.43531	9.52216	4.10911	2.09845	6.33158	2.91608	17.9642	14.2769	13.6109	18.9428	6.35603	1.59113	3.9639	1.68609	3.52457	3.30172	1.5691	1.89738	1.7835	11.8067	2.70408	22.0856	63.2177	1.09708	72.9355	2.00644	3.25233	1.54249	3.80469	1.55999	39.7548	7.30743	90.6524	1.96736	1.44161	4.2138	5.92468	3.36807
hsa-miR-539-3p	MIMAT0022705	0	0	0	2.70962	0.834241	2.38942	0	0.62534	0.79643	0.349008	0	0.705346	0	0	0.527632	0.72902	0.579489	0.679854	0	0	0	0	0	1.05381	0.556511	0.183429	0.28529	0.111611	0	0.302735	0	0	4.32998	0.219416	2.27923	0	0	0.514163	0	0	2.23341	0	11.7392	0.131157	0.961073	0.35115	1.23431	0.240576
hsa-miR-544a	MIMAT0003164	0	0	0	0	0	0	0	0	0	0	0	0	0	0	0	0	0	0	0	0	0	0	0	0	0	0	0.142645	0	0	0	0	0	0	0	0	0	0	0	0	0	0	0	0	0	0	0	0	0
hsa-miR-545-5p	MIMAT0004785	5.89617	4.33397	0	2.93543	0.556161	0.597354	1.0588	0	0	2.09405	0	1.41069	0.228284	1.04923	2.63816	6.56118	4.05642	1.35971	6.18678	1.29745	0	0.265188	1.52458	0.421522	1.11302	0.917145	0.570581	0.446443	1.33762	1.21094	0	0	0.432998	0	2.84904	2.00644	0	1.02833	1.63058	0.311999	0.446683	5.9542	3.91305	0.393472	0.480536	0	0.246862	0.240576
hsa-miR-545-3p	MIMAT0003165	0	0.541746	0	0.225802	0.27808	0	0	0	0.79643	0	0.286276	0	0	0	0	0.36451	0	0	2.47471	0	0	0.265188	0.60983	0.421522	0	0.917145	0.28529	0.111611	0	0.302735	0	0	0	0.219416	0	0	0	0.514163	0.543528	0	0	0.270645	0	0.131157	0	0	0	0.240576
hsa-miR-376a-2-5p	MIMAT0022928	2.21106	0	0	1.58062	0.834241	1.19471	1.5882	0.62534	0	0	0	0	0.228284	0	1.05526	0	0	0	0	0	0	0	0	0.421522	0.185504	0.733716	0.142645	0.223221	0	0.302735	0	0	1.73199	0.219416	3.98866	0	0	0	0	0	0	0.270645	3.91305	0	0	1.4046	0	0
hsa-miR-487b-5p	MIMAT0026614	0	0	0	0.451604	0	0	0	0	0	0	0.286276	0	0	0	0	0	0	0.679854	0	0	0	0.132594	0	0	0	0	0	0	0	0	0	0	1.73199	0	0	0	0	0	0	0	0.446683	0	0	0	0	0	0	0
hsa-miR-487b-3p	MIMAT0003180	1.47404	1.62524	2.96509	19.1932	2.50272	10.155	2.647	5.62806	3.18572	3.83909	3.43531	4.58475	3.42426	0	1.05526	0.36451	6.37438	1.35971	3.71207	3.89235	0.577821	1.72372	3.04915	1.89685	7.60565	4.4023	3.1382	2.1206	0.891748	6.35744	1.15889	1.80291	62.3517	2.63299	13.6754	0.668813	1.62616	0	4.89175	1.55999	6.70025	1.89452	45.0001	0.918101	2.40268	8.07646	8.3933	5.77383
hsa-miR-551a	MIMAT0003214	2.21106	0.541746	0	7.22567	1.11232	6.5709	1.0588	0	0	1.39603	0.572552	1.05802	2.51112	0	0	0.36451	23.1796	0	2.47471	0	0.577821	0.132594	0.60983	1.47533	2.41155	1.10057	2.42497	0.334832	0.445874	0.908206	1.54519	1.35218	4.32998	5.92422	2.84904	5.3505	0	0	1.08706	0.467998	4.02015	0.541291	5.86958	0.393472	0.961073	0	1.97489	0.721728
hsa-miR-552-5p	MIMAT0026615	2.21106	0	0	0.225802	1.94656	0.597354	0	0	0.79643	2.09405	0.858828	0	0.456568	0	0	0	1.15898	0	2.47471	0.25949	0	0	0	0.843044	0.185504	0.183429	0.285291	0	0.891748	1.81641	0	0	0.216499	0.877663	0	0	80.4951	0	1.63058	0.155999	0.446683	2.43581	1.30435	0.786944	7.20805	0	0.246862	0.721728
hsa-miR-552-3p	MIMAT0003215	0	0	0	0.225802	1.3904	0	0	0	0	0.698016	0.572552	0	1.82627	0	0	0	0	0	0	0	0	0	0	0.421522	0	0.183429	0	0	0.445874	0.60547	0	0	0.216499	0.219416	0	0	22.7663	0	1.63058	0	0	0.270645	0	0	1.44161	0	0	0
hsa-miR-554	MIMAT0003217	0	0	0	0	0	0	0	0	0	0	0	0	0	0	0	0	0	0	0	0	0	0	0	0	0	0	0	0	0	0	0	0	0	0	0	0	0	0	0	0	0	0	0	0	0	0	0	0
hsa-miR-92b-5p	MIMAT0004792	0	0	0	0.903208	0	0	0	0	0	1.39603	1.43138	0.352673	0.684852	0	1.05526	0.729019	0	0	1.23736	0.25949	1.73346	0.662971	0.60983	0	0.371008	0.183429	0.28529	0.781275	0.445874	0	0.772593	0	0.649497	1.53591	0.569809	0	0	2.57082	1.08706	0.467997	0	0.270645	0	0.393472	0	0.35115	0	0.240576
hsa-miR-92b-3p	MIMAT0003218	55.2766	53.6328	36.767	128.707	128.751	41.2175	53.4694	41.2725	121.854	241.862	452.316	70.5345	138.568	75.5442	116.079	65.6118	77.072	104.018	137.346	121.182	162.368	304.171	206.123	104.327	132.635	90.4305	81.3078	156.032	28.5359	70.8401	146.02	36.5089	103.27	157.321	55.8413	168.541	11.3831	232.402	187.517	130.26	46.0084	76.0513	104.348	40.2653	65.8335	90.5968	83.6861	110.184
hsa-miR-555	MIMAT0003219	0	0	0	0	0	0	0	0	0	0	0	0	0	0	0	0	0	0	0	0	0	0	0	0	0	0	0	0	0	0	0	0	0	0	0	0	0	0	0	0	0	0	0	0	0	0	0	0
hsa-miR-556-5p	MIMAT0003220	0	2.16698	0.593017	0.451604	0.27808	0	0	0	0	0.349008	0	0	0	1.04923	0	0.729019	0	0	0	0	1.15564	1.06075	0	0	0.556511	0	0.285291	0.669664	0.445874	0.302735	0	0.450727	0.865996	0	0.569809	0.668813	0	0.514163	0.543528	0.155999	0.893366	2.16516	2.6087	0.524629	0	0	0	0.240576
hsa-miR-556-3p	MIMAT0004793	5.15914	0.541746	0	0.903208	0.55616	0.597354	0	0	0	0.349008	0	0.352673	0.228284	2.09845	0	0.729019	1.15898	0	1.23736	0	1.15564	1.98891	0.914745	0.421522	0.742015	0.366858	1.28381	0	0.891748	0	0.386296	0.901453	1.08249	0.219416	1.13962	0	1.62616	1.02833	0	0.311998	0.446683	7.30742	0.652176	1.18042	0.480536	0	0	0.481152
hsa-miR-558	MIMAT0003222	0	0	0	0	0	0	0	0	0	0	0	0	0	0	0	0	0	0	0	0	0	0	0	0	0	0	0.142645	0	0	0	0	0	0	0	0	0	0	0	0	0	0	0	0	0	0	0	0	0
hsa-miR-559	MIMAT0003223	1.47404	0	0	0	0	0	0	0	0	0	0	0	0	0	0	0	0	0	0	0	0	0	0	0.210761	0	0	0	0	0	0	0	0	0	0	0	0	0.813082	0	0	0	0	0.270645	0	0	0	0	0	0
hsa-miR-561-5p	MIMAT0022706	12.5294	3.25047	0.593017	1.12901	0	0	0	0	1.59286	1.39603	1.1451	0.352673	0.456568	0	1.05526	5.83216	1.15898	0	2.47471	0.25949	6.93386	0	10.0622	2.95065	2.59705	0.733716	7.13227	0	0.445874	0.908206	0.386296	0.450727	0.865996	0.877663	0	0.668813	4.06541	0	0	0	0.893366	1.89452	0	0.262314	0	0	0.246862	0.481152
hsa-miR-561-3p	MIMAT0003225	0	0	0	0	0	0	0	0	0	0	0	0	0	0	0	0	0	0	0	0	0	0	0.304915	0	0	0	0.285291	0	0	0	0	0	0	0	0	0	0	0	0	0	0	0	0	0	0	0	0	0
hsa-miR-564	MIMAT0003228	0	0	0	0	0	0	0	0	0	0	0	0	0	0	0	0	0	0	0	0	0	0	0	0	0	0	0	0	0	0	0	0	0.216499	0	0	0	0	0	0	0	0	0	0	0	0	0	0	0
hsa-miR-551b-5p	MIMAT0004794	0	0	0	0	0	0	0	0	0	0	0.572552	0	0.228284	1.04923	0	0	0	0	0	0	0	0	0	0	0	0	0.28529	0	0	0	0.772593	0	0	0.877663	0	0	0	0	0.543528	0	0	0	0	0.262315	0	0	0	0
hsa-miR-551b-3p	MIMAT0003233	3.6851	5.41746	6.52318	3.38703	6.67393	1.79206	3.7058	2.50136	11.9465	7.67817	6.29807	4.23207	10.9576	72.3966	11.0803	56.1345	38.2463	8.15825	13.6109	6.48724	7.51168	0.397783	1.82949	33.3002	3.33906	1.46743	20.8262	1.56255	3.56699	4.23829	20.86	6.7609	49.5783	36.423	2.84904	3.34406	26.0186	2.57081	5.9788	1.40399	17.8673	9.47259	56.7393	1.18042	0.480536	0	2.46862	5.53325
hsa-miR-570-5p	MIMAT0022707	0	0.541746	0	0	0	0	0	0	0	0	0	0	0.228284	0	0	0.36451	0	0.679854	0	0	0	0.265188	0.60983	0.421522	0	0	0	0	0	0	0	0	0	0	0	0	0	0.514163	0.543528	0	0	0	0	0.131157	0	0	0.246862	0
hsa-miR-570-3p	MIMAT0003235	8.84425	0.541746	1.18603	0.903209	0.834241	0	2.1176	0	3.98215	0.698016	0.572552	1.41069	0.456568	3.14768	0.527632	1.09353	0	2.03956	1.23736	0.77847	1.73346	0.530377	1.52458	4.21522	2.59705	0.366858	2.71026	0.223222	2.67524	0.908206	0	0	0.216499	0.877663	3.98866	1.33763	1.62616	1.02833	2.17411	0	0.446683	3.78904	1.95653	2.22967	0	0	1.23431	0.962304
hsa-miR-571	MIMAT0003236	0	0	0	0	0	0	0	0	0	0	0	0	0	0	0	0	0	0	0	0	0	0	0	0	0	0	0	0	0	0	0	0	0	0	0	0	0	0	0	0	0	0	0	0	0	0	0	0
hsa-miR-572	MIMAT0003237	0	0.541746	0	0	0	0	0	0	0	0	0	0	0	0	0.527632	0	0	0	0	0	0	0.265188	0	0	0	0	0	0	0	0	0.386296	0	0	0	0	0	0	0	0	0	0	0	0	0.262315	0	0	0	0
hsa-miR-573	MIMAT0003238	0	1.08349	0.593017	0.225802	0	0	0	0	0	0	0.572552	0	0.456568	1.04923	1.05526	0.36451	0.579489	0.679854	1.23736	0	1.15564	0.265188	0.304915	0.210761	0.371007	0.366858	0	0.223221	0	0	0	0	0	0.219416	0.569809	0	0	0	0.543528	0	1.78673	1.08258	0.652176	0	0	0	0.493724	0
hsa-miR-574-5p	MIMAT0004795	0	0	0	0	0	0	0	0	0	0	0	0	0	0	0	0	0	0	0	0	0	0	0	0	0	0	0	0	0	0	0	0	0	0	0	0	0	0	0	0	0	0	0	0	0	0	0	0
hsa-miR-574-3p	MIMAT0003239	31.6919	54.1746	67.0109	123.74	104.28	104.537	54.5282	54.4046	41.4144	112.73	157.738	49.3742	110.946	58.7566	51.1803	61.2376	121.113	186.96	148.483	86.9291	93.607	67.3579	110.074	124.981	132.264	165.27	60.1963	31.0278	70.0023	59.3361	60.2622	48.6785	81.4037	71.7489	28.4904	36.1159	38.2148	10.2833	40.221	77.8437	69.2359	102.304	73.0437	32.1335	121.095	82.1692	81.4643	103.448
hsa-miR-575	MIMAT0003240	0	0	0	0	0	0	0	0	0	0	0	0	0	0	0	0	0	0	0	0	0	0	0	0	0	0	0	0	0	0	0	0	0	0	0	0	0	0	0	0	0	0	0	0	0	0	0	0
hsa-miR-576-5p	MIMAT0003241	8.84425	11.9184	11.2673	25.7414	16.9629	33.4518	5.8234	15.6335	19.1143	9.42321	6.29807	5.64276	9.35964	7.34458	16.8842	34.6284	31.2924	23.115	18.5603	23.3541	28.8911	10.2098	14.0261	11.8026	7.42014	38.5201	11.6969	5.58053	15.1597	14.834	13.1341	9.01453	10.1755	10.0931	69.5167	24.7461	30.8971	14.9107	10.327	5.77198	11.1671	26.5232	9.78264	7.34481	6.72751	8.07646	12.3431	22.133
hsa-miR-577	MIMAT0003242	48.6434	37.3805	7.1162	31.8381	5.00545	2.98677	28.5876	8.75477	76.4573	2.09405	3.43531	7.40613	38.3517	105.972	33.7685	233.286	4.05642	14.9568	162.094	60.9801	49.6926	43.3583	61.288	27.8205	12.0577	3.48515	18.5439	3.01349	23.1855	3.93556	10.8163	1.35218	23.1654	4.82714	84.3317	1.33763	14.6355	56.5579	1.63058	1.87199	20.9941	204.608	10.4348	87.6131	2.88322	0	10.1213	15.1563
hsa-miR-578	MIMAT0003243	0	0	0	0	0.27808	0	0	0	0	0	0	0	0	0	0	0	1.73847	0	0	0	0.577821	0	0	0	0	0.183429	0	0	0	0	0	0	0	0.658247	0	0	0	0	0	0	0	0	0	0.131157	0.480536	0	0.246862	0.240576
hsa-miR-579-5p	MIMAT0026616	2.94808	0.541746	0.593017	3.61283	1.11232	4.18148	1.5882	1.25068	1.59286	1.39603	1.43138	0	1.59799	1.04923	0	4.73863	3.47693	4.07912	6.18678	1.55694	0.577821	1.85632	0.304915	1.05381	1.85504	1.284	1.28381	0.334832	3.56699	0.302735	0	1.35218	1.08249	1.09708	2.27923	0.668813	0.813082	3.08498	2.17411	0.155999	2.23342	2.70645	1.95653	1.18041	2.40268	0	5.67782	0.721728
hsa-miR-579-3p	MIMAT0003244	0	0.541746	0	0.225802	0.27808	0.597354	0	0	0	0	0.286276	0	0.228284	0	0	1.09353	1.15898	0	0	0.25949	0	0.132594	0	0.843044	1.11302	0.550287	0.285291	0	0.445874	0	0	0	0	0	0.569809	0	0	0	0	0	0	0.541291	1.30435	0	0	0	0.493724	0
hsa-miR-580-5p	MIMAT0026617	0.737021	0	0.593017	0	0.27808	0.597354	0	0	0.79643	0	0	0	0	0	0	0.36451	0	0	1.23736	0	0	0.397782	0	0.421522	0	0.366858	0	0.111611	0	0	0	0.450727	0	0	0	0	0.813082	0.514163	0	0	0	0.270645	0.652176	0.131157	0	0	0.740585	0.240576
hsa-miR-580-3p	MIMAT0003245	0.737021	0.541746	1.18603	1.58062	0	1.19471	0.5294	0	0.79643	0.698016	0	0	0.228284	0	1.5829	1.82255	0.579489	1.35971	1.23736	0	1.15564	1.98891	0.914745	0.210761	0.371007	0.550287	0.855872	0.669665	0.445874	0.908206	0	2.25363	0.432998	0.219416	1.13962	1.33763	4.06541	0.514163	1.08706	0.623997	0.446683	2.43581	0	0.262315	0	0	1.72803	1.20288
hsa-miR-581	MIMAT0003246	0.737021	0	0	1.35481	0.27808	1.79206	2.1176	1.25068	0.79643	0	0	0.352673	0	0	1.05526	1.09353	1.73847	1.35971	0	0.77847	3.46693	0.397782	0	0.210761	0.371008	2.01772	1.14116	0.111611	0	0.302735	1.15889	1.35218	0.649497	0	0.569809	0	0.813082	1.54249	1.63058	0.623998	0.893366	1.35323	0.652176	2.36083	0.480536	0	0	0
hsa-miR-582-5p	MIMAT0003247	53.8025	9.75143	8.30223	19.419	15.5725	11.3497	20.6466	12.5068	9.55716	16.7524	5.72552	5.99544	12.7839	10.4923	6.85922	11.2998	20.2821	15.6366	29.6965	10.1201	12.1342	4.5082	12.5015	16.4394	152.298	10.8223	13.1234	9.3753	16.0515	12.7149	6.56703	5.85945	12.7734	9.8737	13.6754	26.0837	4.87849	5.14163	15.2188	21.3719	8.93366	14.0736	15	4.59051	9.13019	12.9926	20.9832	15.1563
hsa-miR-582-3p	MIMAT0004797	1840.34	341.842	322.008	471.701	474.961	190.556	638.986	475.259	404.586	518.277	135.695	228.885	197.694	458.512	178.34	350.658	370.873	426.268	636.001	191.244	491.148	103.026	159.776	254.599	2470.72	235.523	133.231	122.214	290.264	322.716	340.327	256.013	369.131	460.114	410.262	377.21	165.056	362.485	492.436	742.089	341.713	436.28	378.914	227.296	450.743	357.822	502.117	294.465
hsa-miR-584-5p	MIMAT0003249	84.7574	205.863	77.0922	27.0963	28.9204	241.331	42.8814	33.143	59.7323	22.6855	127.965	167.167	53.6467	47.2151	33.2408	55.041	15.0667	200.557	164.568	51.6385	121.342	78.4958	101.537	73.1341	107.036	101.436	36.3745	34.0413	154.718	65.3908	28.1996	61.2988	17.3199	81.6226	241.029	54.1738	137.411	65.8128	84.7903	152.255	23.2275	16.5094	20.8696	22.5591	58.6254	760.592	41.4728	21.1707
hsa-miR-584-3p	MIMAT0022708	0.737021	0	0	0	0	0	0	0	0	0	1.1451	0	0	0	0	0	0	0	0	0	0	0.132594	0	0	0.556512	0.183429	0.142645	0.223221	0	0	0	0	0	0	0	0	0	0	0	1.87199	0	0	0	0.262315	0	3.16035	0	0.240576
hsa-miR-585-5p	MIMAT0026618	0	0.541746	0.593017	0.451604	1.66848	0.597354	0	0	0.79643	0.349008	0.286276	0	0.456568	0	0.527632	0	0	0	0	0.778469	0	0	0	0	0	0.183429	0	0	0	0	0	0	0	0	1.70943	0	0	0	2.71764	0.155999	0	0.811936	0	0	0	0	0	0
hsa-miR-585-3p	MIMAT0003250	0.737021	0.541746	0	0.677406	0.27808	0.597354	0	0	0	0.698016	0	0	0	0	0	0	0.579489	0.679854	0	0.77847	0	0	0.304915	0	0.185504	0.183429	0.142645	0.334833	0	0.908206	0	0.450727	0	0.658247	0.569809	0	0	0	3.80469	0.155999	0.446683	0.54129	0.652176	0.262315	0	0	0.493724	0
hsa-miR-548a-3p	MIMAT0003251	0	0	0	0	0	0	0	0	0	0	0	0	0	0	0	0	0	0	0	0	0	0	0	0	0	0	0	0	0	0	0	0	0	0	0	0	0	0	0	0	0	0	0	0	0	0	0	0
hsa-miR-586	MIMAT0003252	0	0	0	0	0	0	0	0	0	0	0	0	0	0	0	0	0	0	0	0	0	0	0	0	0	0	0	0	0	0	0	0	0	0	0	0	0	0	0	0	0	0	0	0	0	0	0	0
hsa-miR-548b-5p	MIMAT0004798	0	0	0	0	0.27808	0	0	0	0	0.349008	0	0	0	0	0	0.36451	0.579489	0	0	0.51898	0	0.397782	0	0	0	0	0	0	0	0	0	0	0.216499	0	0	0	0	3.08498	0	0	0	0.811935	0	0.393472	0	0	0	0.240576
hsa-miR-548b-3p	MIMAT0003254	0.737021	0	1.18603	1.58062	1.66848	1.19471	1.0588	0.62534	0.79643	2.09405	1.71765	0.352673	2.28284	2.09845	1.05526	4.00961	2.89744	1.35971	0	1.55694	1.15564	6.76231	0.914745	0.843044	1.29852	0.183429	1.85439	0.781275	0.445874	1.51368	1.54519	0	3.89698	2.19415	0	2.67525	4.06541	9.7691	16.8494	1.71599	1.78673	1.35323	1.30435	1.57389	1.44161	0	2.46862	1.68403
hsa-miR-588	MIMAT0003255	0	0	0	0	0	0	0	0	0	0	0	0	0	0	0	0	0	0	0	0	0	0	0	0	0.185504	0	0	0	0	0	0	0	0	0	0	0	0	0	0	0	0	0	0	0.131157	0	0	0	0
hsa-miR-589-5p	MIMAT0004799	100.235	65.0095	85.9874	55.3215	52.2791	48.3857	107.468	45.0245	116.279	88.648	97.0475	38.794	111.631	117.513	48.5422	87.4823	92.7183	57.7876	142.296	64.3535	80.895	36.9938	50.6159	108.963	97.3894	58.6973	102.99	36.4967	42.8039	69.9318	69.9196	46.8756	59.1043	49.5879	76.9242	84.2704	99.1959	227.26	150.557	56.0038	64.3224	96.0791	81.522	82.1045	54.3006	174.522	84.1798	49.0775
hsa-miR-589-3p	MIMAT0003256	7.37021	2.70873	5.93017	8.12888	3.33696	4.77883	9.5292	4.37738	13.5393	1.74504	2.86276	1.41069	3.88083	9.44303	3.16579	13.4869	13.3282	8.8381	18.5603	7.26572	14.4455	2.12151	1.82949	4.42598	1.29853	2.38458	2.71026	0.334833	1.33762	3.63282	1.15889	3.15509	0.649497	0.877663	11.966	4.68169	9.75698	28.7931	10.8706	0.623997	5.3602	15.4268	2.6087	4.98398	0.961072	3.5115	2.96234	2.40576
hsa-miR-550a-5p	MIMAT0004800	9.58127	4.87571	2.96508	5.19345	5.00545	2.98677	2.647	5.00272	5.57501	3.14107	2.29021	5.29009	3.65254	4.1969	4.74869	6.19667	7.53336	4.07912	8.66149	0.25949	12.1342	5.83414	5.48847	6.53359	3.89558	8.98802	3.56613	2.79027	4.90462	2.72462	10.43	4.05654	5.41248	14.4814	16.5245	17.3891	4.87849	11.8257	10.327	2.49599	3.57347	7.03678	4.56523	30.6908	6.24697	10.5345	15.5523	3.36806
hsa-miR-550a-3p	MIMAT0003257	5.89617	1.08349	0	2.70962	3.05888	4.18148	3.7058	1.25068	0.79643	1.74504	3.14904	0	3.88083	1.04923	1.05526	1.09353	5.2154	7.47839	3.71207	1.29745	7.51168	3.71264	4.87864	5.69055	7.42014	6.60344	2.85291	1.89738	4.90461	0.908205	4.63556	1.35218	2.16499	4.38831	3.41885	7.35694	0.813082	3.08498	3.80469	1.09199	1.78673	5.14226	2.6087	3.27893	1.92214	2.45805	3.45606	1.92461
hsa-miR-590-5p	MIMAT0003258	44.9583	37.3805	28.4648	41.9992	20.856	45.9963	27.5288	21.8869	50.9715	25.1286	12.0236	15.8703	12.0991	39.8706	13.7184	55.4055	41.1437	54.3883	48.2569	23.0946	31.7802	34.3419	21.9539	30.9819	26.7125	29.8989	24.6776	5.80376	24.969	26.338	11.5889	20.7334	16.4539	16.0173	77.494	48.1545	26.0186	34.4489	58.1575	8.42397	25.0143	42.4913	61.3045	9.57448	9.13019	17.2064	19.7489	16.8403
hsa-miR-590-3p	MIMAT0004801	19.1625	11.9184	9.48827	8.80628	10.8451	15.5312	10.0586	11.2561	15.9286	10.4702	2.29021	10.5802	2.05456	6.29535	8.96974	12.7578	11.5898	18.3561	16.0856	8.04418	9.24514	8.08825	7.92779	9.48424	7.79115	7.70402	9.98517	0	4.90462	10.5957	9.27111	13.5218	8.44346	6.36305	21.0829	20.0644	4.87849	5.14163	8.69644	9.67197	8.0403	7.03678	18.9131	5.24629	5.76644	3.86265	3.70293	7.93901
hsa-miR-592	MIMAT0003260	3.6851	5.41746	2.37207	4.29024	2.50272	0.597354	3.7058	13.1321	3.18572	5.58413	1.43138	12.6962	2.05456	2.09845	18.9948	21.5061	1.15898	2.71942	1.23736	2.85439	3.46693	2.78448	0.914745	2.73989	2.22604	1.46743	2.13968	2.45544	1.7835	3.93556	0.386296	0.450727	6.27847	3.07182	5.69809	4.68169	3.25233	5.65579	364.707	2.80799	2.6801	3.51839	1.95653	2.36083	0.480536	0	3.2092	0.240576
hsa-miR-597-5p	MIMAT0003265	1.47404	0.541746	0	0	0	0	0	0	0	0	0	0	0	0	0	0.36451	0	0	0	0.25949	0	0.265188	0.304915	0.210761	0.742014	0	0.285291	0	0	0	0	0	0	0	0	0	0	0.514163	0	0	0	0.541291	0.652176	0	0	0	0.246862	0
hsa-miR-597-3p	MIMAT0026619	0	0	0	0	0	0	0	0	0	0	0.286276	0	0.228284	0	0	0	0	0	0	0	0.577821	0	0	0.210761	0	0	0	0	0	0	0.386296	0	0.216499	0	0	0	0	0	0	0	0	0	0	0	0	0	0.246862	0
hsa-miR-598-5p	MIMAT0026620	0	0	0	0	0	0	0.5294	0	0	0.349008	0	0	0	0	0	0	0	0	0	0.25949	0.577821	0	0	0.210761	0	0	0	0	0	0	0.386296	0	0	0.219416	0.569809	0	0	0	0	0	0	0	0	0	0	0	0	0.240576
hsa-miR-598-3p	MIMAT0003266	8.84425	23.8368	15.4184	10.6127	35.5943	22.1021	34.9404	25.0136	21.5036	24.4306	15.1726	10.9329	20.7738	10.4923	27.4369	82.7437	11.0103	4.07912	8.66149	34.2527	19.0681	1.98891	20.7342	52.901	36.7297	7.88745	23.8218	17.5229	24.0772	14.5313	28.9722	6.7609	58.2383	44.1025	2.27923	10.0322	10.5701	1.54249	7.06586	23.3999	13.8472	27.8765	7.82611	4.45935	9.61073	24.2294	8.88702	18.0432
hsa-miR-599	MIMAT0003267	0	0	0	0	0	0	0	0	0	0	0	0	0	0	0	0	0	0	0	0	0	0	0	0	0	0	0	0	0	0	0.386296	0	0	0	0	0	0	0	97.2914	0	0	0	0	0	0	0	0	0
hsa-miR-548a-5p	MIMAT0004803	0	0	0.593017	0	0	0	0	0	0	0	0.286276	0	0	0	0	0.729019	0	0	1.23736	0	1.15564	0.132594	0	0.421522	0.185504	0.183429	0.142645	0	0	0	0	0.450727	0	0	0.569809	0	0	0	0	0	0	0	0	0	0.480536	0	0	0
hsa-miR-600	MIMAT0003268	0	0	0	0	0	0	0	0	0	0	0	0	0	0	0	0	0	0	0	0	0	0	0	0	0	0	0	0	0	0	0	0	0	0	0	0	0	0	0	0	0	0	0	0	0	0	0	0
hsa-miR-601	MIMAT0003269	0	0	0	0	0	0	0	0	0	0	0	0	0	0	0	0	0	0	0	0	0	0	0	0	0	0	0	0	0	0	0	0	0	0	0	0	0	0	0.543528	0	0	0	0	0	0	0	0	0
hsa-miR-602	MIMAT0003270	0	0	0	0.225802	0	0	0	0	0	0	0	0	0	0	0	0	0	0	0	0	0	0	0	0	0	0	0	0	0	0	0	0	0	0	0	0	0	0	0	0	0	0	0	0	0	0	0	0
hsa-miR-603	MIMAT0003271	0	0	0	0	0	0	0	0	0	0	0	0	0	0	0	0	0	0	0	0	0	0	0	0	0	0	0	0.111611	0	0	0	0	0	0	0	0	0	0	0	0	0	0	0	0	0	0	0	0
hsa-miR-604	MIMAT0003272	0	0	0	0	0	0	0	0	0	0	0	0	0	0	0	0	0	0	0	0	0	0	0	0	0	0	0	0	0	0	0	0	0	0	0	0	0	0	0	0	0	0	0	0	0	0.35115	0	0
hsa-miR-605-5p	MIMAT0003273	0	0	0	1.12901	0.55616	0	0	0	0	0.698016	0	0	0.228284	1.04923	0	0.729019	0	0	1.23736	0.51898	0.577821	0.132594	0	0.210761	0.185504	0.366858	0.28529	0.111611	0	0.60547	0	1.35218	0.649497	0.219416	0.569809	0.668813	0	0	3.80469	0.623997	0.893366	0.811935	0	0.131157	0.961073	0	0	0.240576
hsa-miR-605-3p	MIMAT0026621	0	0	0	0	0	0	0	0	0	0	0	0	0	0	0	0	0	0	0	0	0	0	0	0	0	0	0	0	0	0	0	0	0	0	0	0	0	0	0	0	0	0	0	0	0	0	0	0
hsa-miR-606	MIMAT0003274	0	0	0	0	0	0	0	0	0	0	0	0	0	0	0	0	0	0	0	0	0	0	0	0	0	0	0	0	0	0	0	0	0	0	0	0	0	0	0	0	0	0	0	0	0	0	0	0
hsa-miR-607	MIMAT0003275	0	0	0.593017	0	0	0	0	0.62534	0.79643	0	0	0	0	0	0	0	0	0	0	0	0	0	0	0	0.371007	0	0	0	0.445874	0.302735	0	0	0	0	0	0	0	0	0	0	0.446683	0	0	0.131157	0	0.7023	0	0
hsa-miR-609	MIMAT0003277	0	0	0	0.225802	0	0	0	0	0	0	0	0	0	0	0	0	0	0	0	0	0	0	0	0	0	0	0	0	0	0	0	0	0	0	0	0	0	0	0	0	0	0	0	0	0	0	0	0
hsa-miR-610	MIMAT0003278	0	0	0	0	0	0	0	0	0	0	0	0	0	0	0	0	0	0	0	0	0	0	0	0	0	0	0	0	0	0	0	0	0	0	0	0	0	0	0	0	0	0	0	0	0	0	0	0
hsa-miR-611	MIMAT0003279	0	0	0	0	0	0	0	0	0	0	0	0	0	0	0	0	0	0	0	0	0	0	0	0	0	0	0	0	0	0	0	0	0	0	0	0	0	0	0	0	0	0	0	0	0	0	0	0
hsa-miR-612	MIMAT0003280	0	0	0	0.225802	0	0	0	0	0	0	0	0	0	0	0	0	0	0	1.23736	0	0	0	0	0	0	0	0	0	0	0	0	0	0	0	0	0	0	0.514163	0	0	0	0	0	0	0	0	0	0
hsa-miR-614	MIMAT0003282	0	0	0	0	0	0	0	0	0	0	0	0	0	0	0	0	0	0	0	0	0	0	0	0	0	0	0.142645	0	0	0	0	0	0	0	0	0	0	0	0	0	0	0	0	0	0	0	0	0
hsa-miR-615-5p	MIMAT0004804	0	0	0	0	0	0	0	0.62534	0	0	0	0	0	0	0	0	1.15898	0	0	0	0	0.265188	0	0	0.185504	0	0	0	0	0	0.386296	0	0	0	0	0	0	0	0	0	0	0.270645	0	0.131157	0	0.35115	0.246862	0.240576
hsa-miR-615-3p	MIMAT0003283	5.15915	0.541746	1.18603	11.0643	0.27808	16.7259	2.1176	1.87602	2.38929	0	2.00393	0.705346	2.73941	0	1.5829	13.1223	18.5437	2.71942	9.89885	5.96827	1.15564	66.2971	0.304915	7.16587	1.11302	4.4023	0.713226	0.892886	4.90462	1.21094	5.79444	0	0.865996	9.8737	5.12828	3.34406	0	46.7888	3.80469	2.02799	6.70025	3.51839	1.30435	23.8706	0	1.75575	19.7489	4.08979
hsa-miR-616-5p	MIMAT0003284	8.10723	7.58444	7.1162	9.03209	4.17121	10.155	3.7058	7.50408	7.16787	4.88611	1.71766	3.52673	4.56568	13.6399	8.44211	18.9545	6.37438	10.8777	17.323	7.78469	17.3346	1.98891	5.18356	1.68609	3.89557	2.56801	1.14116	1.0045	4.01287	3.93556	1.93148	5.40872	0.649497	0.219416	14.815	7.35694	27.6448	15.4249	10.327	0.467998	3.57347	25.982	5.21741	0.524629	0.961073	0.7023	6.91213	4.57095
hsa-miR-616-3p	MIMAT0004805	1.47404	3.25047	4.15112	3.83864	1.11232	2.38942	0.5294	1.87602	4.77858	1.04702	0.858828	1.05802	1.82627	6.29535	0.527632	3.6451	3.47693	5.43883	1.23736	2.07592	3.46693	0.530376	1.52458	2.10761	1.48403	1.46743	0.142645	0.558054	0	0.908205	3.09037	4.05654	1.29899	1.75533	3.98866	0.668813	5.69157	7.71244	3.26117	0.467997	0.893366	6.22484	0	0.52463	0.480536	0.7023	2.46862	2.16519
hsa-miR-617	MIMAT0003286	0	0	0	0	0	0	0	0	0	0	0	0	0	0	0	0	0	0	0	0	0	0	0	0	0	0	0	0	0	0	0	0	0	0	0	0	0	0	0	0	0	0	0	0	0	0	0	0
hsa-miR-618	MIMAT0003287	0	0	1.18603	0.451604	0.834241	1.19471	1.0588	0.62534	0	0.349008	0	0.352673	0.684852	0	2.63816	3.6451	0.579489	0	2.47471	0.51898	0	2.65188	1.52458	2.31837	0.742016	0	0.570581	1.67416	0	0.60547	0.772593	0	0.216499	0.219416	0	5.3505	8.13082	0	0.543528	0.467998	0	0.54129	0	0.131157	1.44161	0.7023	0.740585	0.481152
hsa-miR-621	MIMAT0003290	0	0	0	0	0	0	0	0	0	0	0	0	0	0	0	0	0	0	0	0	0	0	0	0	0	0	0	0	0	0	0	0	0	0	0	0	0	0	0	0	0	0	0	0	0	0	0	0
hsa-miR-622	MIMAT0003291	0	0	0	0	0	0	0	0	0	0	0	0	0	0	0	0	0	0	0	0	0	0	0.304915	0	0	0	0	0	0	0	0.386296	0	0	0	0	0	0	0	0	0	0	0	0	0	0	0	0	0.240576
hsa-miR-624-5p	MIMAT0003293	3.6851	1.08349	1.77905	1.58061	1.11232	1.79206	0	1.25068	2.38929	0.698016	2.29021	0.352673	0.456568	0	0	1.09353	1.15898	0.679854	3.71207	0.51898	0.577821	1.85632	1.52458	2.73989	2.78255	4.4023	0.57058	1.0045	2.22937	0.908206	0.772593	0.450727	0.865996	0	2.27923	0.668813	0	0.514163	1.63058	1.092	0.446683	0	1.30435	0.786943	2.40268	1.05345	1.48117	1.20288
hsa-miR-624-3p	MIMAT0004807	0	0	0	0	0	0.597354	0	0	0	0	0	0	0	0	0	0	0	0	0	0	0	0	0	0.210761	0	0.183429	0	0	0	0	0	0	0	0	0	1.33763	0	0	0	0.311999	0	0	0	0	0	0	0	0
hsa-miR-625-5p	MIMAT0003294	5.89616	2.16698	2.37207	4.06444	2.7808	5.37619	2.1176	5.00272	2.38929	4.88611	3.72159	2.46871	4.79396	1.04923	3.16579	5.10314	8.11285	1.35971	6.18678	1.55694	3.46693	2.12151	3.65898	1.89685	4.45209	1.10057	3.56613	2.90188	1.7835	0.60547	1.54519	2.70436	2.16499	1.09708	2.84904	8.69457	6.50465	3.59914	3.26117	5.77198	2.23342	3.51839	2.6087	1.70504	0.961073	2.1069	4.69037	3.60864
hsa-miR-625-3p	MIMAT0004808	908.01	253.537	240.172	239.124	325.354	634.988	118.586	412.099	174.418	236.627	216.711	174.926	366.167	467.955	340.323	473.134	336.683	125.773	202.926	190.206	399.274	111.91	236.004	141.842	142.281	185.263	221.813	156.925	102.105	226.446	166.107	314.156	280.15	62.314	200.003	208.001	909.025	267.365	425.582	357.083	289.897	215.975	245.87	74.235	209.033	270.737	206.87	197.754
hsa-miR-627-5p	MIMAT0003296	7.37021	2.70873	2.96509	4.96765	3.05888	3.58413	3.1764	0.62534	1.59286	1.39603	1.43138	1.05802	1.14142	0	2.11053	2.18706	7.53336	8.15825	3.71207	1.29745	4.04475	1.45854	1.21966	1.68609	2.59705	1.284	0.713226	0.334833	0.445874	3.63282	1.15889	0.901453	2.38149	2.8524	10.8264	6.68813	3.25233	6.16995	4.34822	0	1.78673	8.39001	2.6087	0.524629	0.961072	1.75575	0.493724	0.962305
hsa-miR-627-3p	MIMAT0026623	0	0.541746	0	0	0.834241	0	0	0	0	0	0.286276	0.352673	0.456568	0	0	0.72902	0.579489	1.35971	0	0.77847	1.15564	0.397783	0	0.210761	0.371008	1.10057	0.142645	0.334832	0	0	0.386296	0.450727	0.216499	0.658247	1.13962	1.33763	0	0	0	0.155999	0	0.54129	0	0	0	0	0.246862	0
hsa-miR-628-5p	MIMAT0004809	61.1727	78.0114	58.7087	56.6763	38.3751	35.2439	56.6458	109.435	40.6179	67.3585	5.15297	54.3116	4.3374	136.399	117.134	79.4631	67.2207	33.9927	108.887	81.7393	64.716	11.2705	9.75729	5.47979	5.00859	5.86973	4.84994	4.35282	46.3709	81.4358	14.6793	64.4539	60.4032	8.77662	85.4713	121.055	52.0372	34.9631	54.8963	15.9119	91.5701	66.5788	102.392	13.6404	10.5718	6.67186	14.0711	9.38247
hsa-miR-628-3p	MIMAT0003297	0	2.16698	1.18603	1.58062	0.27808	2.38942	0	1.25068	1.59286	1.04702	1.1451	0.705346	1.14142	0	1.5829	0.72902	1.73847	0	0	1.29745	1.15564	1.19335	3.65898	4.21522	5.3796	0.917145	1.14116	0.781276	0	0.908205	0	0.450727	3.46399	1.31649	0	2.67525	0.813082	0.514163	1.63058	0.779997	0.893366	2.16516	0.652176	1.57389	0.480536	1.05345	1.72803	1.44346
hsa-miR-629-5p	MIMAT0004810	241.743	202.613	118.01	176.577	96.772	145.157	91.0568	86.297	209.461	76.7817	256.217	63.1284	234.676	357.786	116.079	211.416	135.6	123.054	279.642	109.764	188.37	224.747	144.835	167.133	136.716	146.376	142.503	99.2219	80.7032	104.141	109.708	233.026	171.684	172.68	94.5882	137.775	386.214	555.81	251.653	110.604	174.653	264.962	139.566	120.14	243.632	179.789	455.46	143.624
hsa-miR-629-3p	MIMAT0003298	28.7438	22.7533	19.5696	12.8707	8.06433	21.5048	7.4116	26.2643	11.15	3.14107	4.58041	3.52673	13.0122	29.3783	18.4671	20.048	8.11285	10.1978	8.66149	21.7971	16.179	5.96674	16.1605	6.95511	5.93611	7.52059	8.55872	6.36181	8.02573	11.5039	1.93148	9.46526	5.19598	3.51065	26.781	19.3956	42.2802	58.6146	13.5882	4.83598	22.3342	25.4407	24.1305	4.19703	4.32483	5.96956	23.6987	16.5998
hsa-miR-630	MIMAT0003299	0	0	0	0	0	0	0	0	0	0	0	0	0	0	0	0	0	0	0	0	0	0	0	0	0	0	0	0	0	0	0	0	0	0	0	0	0	0	0	0	0	0	0	0	0	0	0.246862	0
hsa-miR-631	MIMAT0003300	0	0	0	0	0	0	0	0	0	0	0	0	0	0	0	0	0	0	0	0	0	0	0	0	0	0	0	0	0	0	0	0	0	0	0	0	0	0	0	0	0	0	0	0	0	0	0	0
hsa-miR-33b-5p	MIMAT0003301	57.4876	6.50095	2.37207	6.09666	4.44929	1.79206	5.294	1.25068	3.18572	11.1683	1.43138	5.64276	2.96769	3.14768	3.69342	10.5708	8.11285	7.47839	11.1362	1.81643	15.0234	5.83415	4.26881	8.43044	42.4803	6.9703	6.27639	2.79027	0.445874	3.02735	11.5889	4.05654	0.432998	2.8524	15.3848	30.0966	0.813082	7.71244	7.06586	4.05598	8.48698	19.4865	26.7392	2.7543	2.88322	1.4046	2.96234	2.88691
hsa-miR-33b-3p	MIMAT0004811	1.47404	0.541746	0	0.225802	0	1.19471	0.5294	0.62534	0	0.349008	1.1451	1.05802	1.14142	0	3.69342	1.09353	1.15898	0	1.23736	0.25949	1.15564	1.19335	0.60983	0.843044	2.04054	1.10057	2.56761	0.223222	0	0	2.31778	0.450727	0	0.877662	0.569809	0	0	2.57082	1.08706	1.092	0.893366	1.35323	0	0.131157	2.40268	1.05345	1.48117	0.481152
hsa-miR-632	MIMAT0003302	0	0.541746	0.593017	0.225802	0.27808	0	1.0588	0	0	0.349008	0.572552	0	0.456568	1.04923	0.527632	0.36451	0	0	0	0.77847	0.577821	0.795564	0	0	0.185504	0.183429	1.14116	0.223222	0	0.302735	2.70407	0	0.432998	0	0.569809	0.668813	1.62616	0	0	0.311998	0	0.54129	0	0.262314	0	0	0.493724	0.962304
hsa-miR-635	MIMAT0003305	0	0	0	0	0	0	0	0	0	0	0	0	0	0	0	0	0	0	0	0	0	0	0	0	0	0	0	0	0	0	0	0	0	0	0	0	0	0	0	0	0	0	0	0	0	0	0	0
hsa-miR-636	MIMAT0003306	0	0	0	2.48382	0	0.597354	0	0	0	0	0.286276	0	0.684852	0	0	0.36451	1.15898	0	3.71207	0	0	0.397782	0.304915	0	1.29853	0.550287	0.427936	0.111611	0.891748	0	0.386296	0	1.08249	0	0	0	0	1.54249	0	1.248	0	0	0	1.44273	0.480536	0.35115	0.987448	0.240576
hsa-miR-637	MIMAT0003307	0	0	0	0	0	0	0	0	0	0	0	0	0	0	0	0	0	0	0	0	0	0	0	0	0	0	0	0	0	0	0	0	0	0	0	0	0	0	0	0	0	0	0	0	0	0	0	0
hsa-miR-638	MIMAT0003308	0	0	0	0	0	0	0	0	0	0	0	0.352673	0	0	0	0	0	0	0	0	0	0	0	0	0	0	0	0	0	0	0	0	0	0	0	0	0	0	0	0	0	0	0	0	0	0	0	0
hsa-miR-639	MIMAT0003309	3.6851	1.62524	0	1.58061	0.27808	0.597354	0.5294	0.62534	0.79643	1.39603	0.572552	1.41069	0.456568	1.04923	0.527632	0.72902	0	1.35971	0	1.55694	0	1.59113	0	0.632283	0	0	1.85439	0.669665	0.445874	1.21094	1.93148	0	0	0.219416	0.569809	1.33763	0	0	0	1.71599	0.446683	0.270645	1.30435	0.524629	0	0	0.987447	0.240576
hsa-miR-640	MIMAT0003310	0	0	0	0	0	0	0	0	0	0	0	0	0	0	0	0	0	0	0	0	0	0	0	0	0	0	0	0	0	0	0	0	0	0	0	0	0	0	0	0	0	0	0	0	0	0	0	0
hsa-miR-641	MIMAT0003311	0.737021	1.08349	0.593017	0	0	1.19471	0	0	0	0	0	0	0	0	0	0	0.579489	0	0	0	0.577821	0	0	0	0	0	0	0	0	0	0.386296	0	0	0.658247	0.569809	2.00644	0.813082	0	0	0	0	1.62387	0	0	0	0.35115	0.246862	0.240576
hsa-miR-642a-5p	MIMAT0003312	7.37021	6.50095	6.52318	7.67727	19.1875	10.155	3.1764	7.50408	3.98215	9.42321	8.01572	1.76336	4.3374	10.4923	7.91448	5.83216	7.53336	12.9172	7.42413	4.93031	20.8016	0.662971	3.04915	2.52913	1.48403	1.284	1.71174	1.78577	0.445874	7.56838	2.31778	4.05654	0	0	5.12828	3.34406	8.13082	2.57081	3.26117	5.92798	5.3602	3.78904	1.95653	1.18042	1.44161	1.05345	4.19665	5.53325
hsa-miR-642a-3p	MIMAT0020924	1.47404	0	0	0.225802	0	0	0	0	0	0	0	0	0	0	0	0	0	0	1.23736	0	0	0	0.304915	0	0.185504	0	0	0	0	0	0	0	0	0	0.569809	0	0	0	0	0.467998	0	0.270645	0	0	0	0.35115	0	0.240576
hsa-miR-643	MIMAT0003313	1.47404	0	0.593017	0	0.27808	0.597354	0	0.62534	0.79643	0.349008	0	0	0.456568	1.04923	0.527632	0.72902	0	0	1.23736	0.51898	0	0.265188	0.304915	0.421522	0.371007	0.733716	0.855871	0.223222	0.445874	0.908206	0.386296	0	0	0.438831	0.569809	0.668813	0.813082	0.514163	0.543528	0	0.446683	0.541291	0	1.18042	0	0.35115	2.71548	0.481152
hsa-miR-647	MIMAT0003317	0	0	0	0	0	0	0	0	0	0	0	0	0	0	0	0	0	0	0	0	0	0	0	0	0	0	0	0	0	0	0	0	0	0	0	0	0	0	0	0	0	0	0	0	0	0	0	0
hsa-miR-650	MIMAT0003320	0	0	0	0	0	0	0	0	0	0	0	0	0	0	0	0	0	0	0	0	0	0	0	0	0	0	0	0	0	0	0	0	0	0	0	0	0	0	0	0	0	0	0	0	0	0	0	0
hsa-miR-651-5p	MIMAT0003321	5.15914	2.16698	7.70922	7.67727	2.22464	7.76561	5.294	8.12942	4.77858	1.04702	3.72159	3.17406	4.10911	25.1814	2.11053	10.2063	6.95387	4.75898	12.3736	2.5949	13.8677	21.0825	15.5507	10.3273	0.927519	27.8812	5.56317	3.23671	10.701	1.81641	4.24926	9.01453	3.68048	12.2873	1.70943	0.668813	19.514	3.08498	2.71764	1.092	5.3602	12.179	20.8696	1.57389	2.40268	1.05345	8.88702	5.29268
hsa-miR-651-3p	MIMAT0026624	0	0	0	0	0	0	0	0	0	0	0	0	0	0	0	0	0	0	0	0	0	0.132594	0	0	0	0	0	0	0	0	0	0	0	0	0	0	0	0	0	0	0	0	0	0	0	0	0	0
hsa-miR-652-5p	MIMAT0022709	6.63319	0.541746	0	0.903208	0.27808	0	2.1176	0	0.79643	0.349008	0.286276	1.05802	0.456568	3.14768	0.527632	0.72902	0	0	0	1.03796	0	1.45853	0.304915	0.210761	1.29853	0.366858	0.998517	0.558054	0	0.302735	0	0	0.216499	0.219416	0	0.668813	0	2.05665	0	0.155999	0.893366	0.541291	0	0.393472	0	0	2.71548	0
hsa-miR-652-3p	MIMAT0003322	182.044	20.0446	37.3601	30.7091	37.5409	33.4518	20.1172	14.3828	24.6893	29.3167	56.3963	35.6199	86.0631	64.0028	27.4369	102.063	21.4411	16.3165	29.6965	29.8413	41.6031	77.3024	22.8686	51.8472	61.0307	29.5321	50.0685	51.6758	45.4792	18.4669	49.8322	19.832	46.9803	45.6384	42.7357	30.7654	28.4579	93.5776	26.0893	28.7039	39.7548	16.5094	19.5653	54.6926	42.2872	14.3972	161.201	31.9966
hsa-miR-548d-5p	MIMAT0004812	0	0	0	0	0	0	0	0	0	0	0	0	0	0	0	0	0	0	0	0	0	0	0	0	0	0	0	0	0	0	0	0	0	0	0	0	0	0	0	0	0.446683	0	0	0	0	0	0	0
hsa-miR-548d-3p	MIMAT0003323	1.47404	0.541746	0.593017	1.35481	0.55616	1.19471	0.5294	0	0	0.349008	0.286276	0	0	0	0.527632	0.36451	0	0.679854	0	0	1.73346	0.530376	0.60983	0	0.742016	1.284	1.28381	0.223222	0.445874	0.302735	0	0	0	1.09708	4.55847	2.67525	1.62616	0	0.543528	0	0	0.811935	0	0.262314	0	0	0.987448	0.481152
hsa-miR-661	MIMAT0003324	0	0	0	0	0	0	0	0	0	0	0	0	0	0	0	0	0	0	0	0	0	0	0	0	0	0	0	0	0.445874	0	0	0	0	0	0	0	0	0	0	0	0	0	0	0	0	0	0	0
hsa-miR-662	MIMAT0003325	0	0	0	0	0	0	0	0	0	0	0	0	0	0	0	0	0	0	0	0	0	0	0	0.632283	0.556511	0	0	0	0	0	0	0	0	0	0	0	0	0	0	0	0	0	0	0	0	0	0.246862	0
hsa-miR-663a	MIMAT0003326	0.737021	0.541746	0	0.677406	0	1.19471	0.5294	0	0	0	0	0.352673	0	0	0	0.36451	1.73847	0	1.23736	0	0	0.132594	0.914745	0.421522	0	0	3.28084	0.558055	0.445874	0	0.772592	0	0.649497	1.31649	0	0.668813	0	1.02833	1.63058	0.155999	0	0	0	0.131157	0.480536	1.4046	0	0.481152
hsa-miR-449b-5p	MIMAT0003327	1.47404	0	0	0.677406	0	0	0.5294	0	0	3.49008	0.286276	0	0.228284	0	0	0	0.579489	0	0	0.25949	2.88911	0	0	0	0	0	0	0	4.45874	0.302735	0.386296	0	0	0	1.13962	0.668813	0	0	0	0	0.446683	0	0	0.131157	0	0	0	0
hsa-miR-449b-3p	MIMAT0009203	0	0	0	0	0	0	0	0	0	0.349008	0.286276	0	0	0	0.527632	0	0	0	0	0	0.577821	0	0	0	0.185504	0	0	0	0.445874	0.302735	0.772592	0	0.216499	0	0	0	0	0	0	0	0.446683	0	0	0	0.480536	0	0.246862	0
hsa-miR-653-5p	MIMAT0003328	8.84425	17.3359	20.7556	12.4191	13.0698	22.1021	6.8822	40.6471	3.98215	62.1234	10.5922	5.64276	16.2082	29.3783	64.8987	33.1704	94.4567	19.7158	25.9845	13.4935	6.35603	7.69046	11.2819	6.95511	2.96806	26.0469	15.1204	2.90188	5.79636	16.045	5.79445	24.3392	3.03099	2.8524	3.98866	1.33763	1.62616	2.57081	13.0447	6.23998	23.6742	29.5003	11.087	4.06588	3.84429	0	6.4184	3.36807
hsa-miR-653-3p	MIMAT0026625	0	0	0	0.225802	0.83424	0.597354	0	0.62534	0	1.39603	0	0	0	0	0.527632	0.729019	1.15898	0	1.23736	0	0	0.265188	0.60983	0.210761	0	1.83429	0.570581	0.111611	0	0.302735	0.772592	0	0	0.438831	0	0	0	0	1.08706	0.155999	0	1.62387	1.95653	0.131157	0	0	0	0
hsa-miR-411-5p	MIMAT0003329	8.10723	4.33397	1.18603	20.548	4.17121	8.96032	5.8234	8.12942	6.37144	3.14107	4.58041	5.64276	6.39195	0	2.63816	1.45804	4.05642	5.43883	1.23736	3.89235	1.15564	1.32594	3.65898	3.16141	6.67813	4.95258	6.41904	5.69215	1.33762	6.35744	6.56704	4.05654	46.3308	6.36305	20.5131	0.668813	2.43925	1.02833	4.34822	5.14798	8.93366	2.70645	54.7828	2.36083	2.88322	12.9926	8.3933	2.64634
hsa-miR-411-3p	MIMAT0004813	1.47404	1.08349	1.77905	7.22567	0.834241	5.37619	0	0.62534	0	0	0.572552	1.05802	2.05456	0	0	1.09353	1.15898	0	0	0.51898	0.577821	0.132594	0.304915	0.210761	1.66953	0.550287	0.285291	0.669664	0.445874	1.21094	1.15889	0.901453	14.5054	0.219416	6.2679	0	0	0	1.63058	0.467998	3.12678	0	23.4783	0.131157	0.480536	1.75575	1.48117	1.68403
hsa-miR-654-5p	MIMAT0003330	1.47404	0.541746	0.593017	9.25789	0.83424	4.18148	0	2.50136	0.79643	0.698016	1.71766	2.11604	2.28284	0	0.527632	0	3.47693	1.35971	0	0.51898	0.577821	0.132594	1.52458	0.421522	0.927519	1.46743	1.28381	0.892886	0	0.60547	1.15889	0.450727	24.4644	1.09708	10.2566	0	1.62616	0.514163	0	1.55999	5.3602	0	12.3913	0.262314	1.92214	2.45805	0.987447	0.721728
hsa-miR-654-3p	MIMAT0004814	19.8996	10.8349	15.4184	122.611	17.241	65.1116	19.0584	42.5231	12.7429	17.7994	27.1962	19.0443	34.6992	8.3938	11.0803	5.10314	34.1899	25.8345	7.42413	6.22776	6.35603	4.77339	15.5507	20.8653	42.6658	28.4315	12.8381	9.26369	2.22937	27.8516	15.4519	16.2262	508.123	17.3338	107.694	1.33763	4.06541	1.54249	17.3929	13.416	71.0226	17.3213	605.871	7.47597	14.4161	45.6496	51.1004	13.9534
hsa-miR-655-5p	MIMAT0026626	0	0	0	0.903208	0	0	0	0	0	0	0	0	0	0	0	0	0	0	0	0	0	0	0	0	0	0	0	0	0	0	0	0	0	0	0.569809	0	0	0	0	0	0	0	0	0	0.480536	0	0	0
hsa-miR-655-3p	MIMAT0003331	1.47404	0.541746	2.37207	12.8707	1.66848	6.5709	0.5294	3.1267	1.59286	1.04702	1.1451	0.705346	1.3697	0	1.05526	0	4.63591	0.679854	0	0.25949	0.577821	0.132594	1.52458	1.05381	2.22604	2.01772	1.28381	2.34382	0	2.11915	2.70408	1.35218	25.7634	1.31649	11.3962	0.668813	0	0	1.08706	0.311999	5.80688	0.54129	21.5218	0.524629	1.92215	2.8092	2.46862	0.962304
hsa-miR-656-5p	MIMAT0026627	0	0	0	0.225802	0	0	0	0	0	0	0.286276	0	0.228284	0	0	0	0	0	0	0	0	0	0	0	0	0	0	0	0	0	0	0	0.865996	0	0	0	0	0	0	0	0	0	3.26088	0	0	0	0	0
hsa-miR-656-3p	MIMAT0003332	0	0	0	1.58062	0.834241	0	1.0588	0	0.79643	0	0	0.705346	0.228284	0	0.527632	0	0	0.679854	2.47471	0.77847	0	0	0.304915	0.843044	0.742014	0.366858	0.713226	0.669664	0	0	1.15889	0.901453	5.62898	0.877662	1.13962	0	0	0	0	0.311999	2.23342	0.811936	7.17393	1.04926	0	0.702301	0.987447	0
hsa-miR-549a	MIMAT0003333	0	0.541746	0	0	0	0.597354	0	0	0	0.349008	0.286276	0.352673	0.456568	0	0	0	0	0	0	0	0	0	0	0	0	0	0.427936	0	0	0	0	0	0	0	1.13962	0.668813	0.813082	0	1.08706	0.311998	0	0	0	0	0	0	0.246862	0
hsa-miR-658	MIMAT0003336	0	0	0	0.225802	0.83424	0	1.0588	0	0	0.349008	0	0.352673	0	0	1.5829	0.729019	0	0	0	0.25949	0	0.530376	0	0	0	0.366858	0.142645	0.223222	0.891748	0.908205	0.772592	0.450727	0	1.09708	0	0	0	0	0	0.623997	0.446683	0.541291	0	0.262314	2.88322	0	0.740585	0.240576
hsa-miR-659-5p	MIMAT0022710	2.21106	2.70873	4.15112	2.48382	3.33696	1.79206	3.1764	1.87602	3.98215	3.14107	1.71766	2.46871	2.05456	4.1969	2.11053	2.18706	1.73847	2.03956	6.18678	4.15184	1.73346	1.85632	1.82949	1.89685	1.48403	1.65086	2.28232	1.45094	1.33762	2.42188	1.54518	2.25363	1.08249	2.19416	2.84904	0.668813	3.25233	1.54249	1.08706	1.09199	1.78673	2.43581	0.652176	1.04926	0	0.7023	1.72803	1.44346
hsa-miR-659-3p	MIMAT0003337	0	0	0	0.225802	0	0	0	0	0	0.349008	0	0	0	0	0	0	0	0	0	0	0	0	0	0	0	0	0.142645	0	0	0	0	0	0	0	0	0	0	0	0	0	0.446683	0	0	0	0	0	0	0
hsa-miR-660-5p	MIMAT0003338	18.4255	18.9611	44.4763	30.0317	42.5463	41.8148	33.3522	26.8896	41.4144	27.5716	70.7101	31.7405	80.5842	38.8213	30.6027	38.2735	59.1079	37.392	32.1713	27.5059	54.3152	55.0266	117.087	68.9188	47.1179	32.4669	62.6213	44.6443	19.6185	26.0352	37.857	23.4378	13.8559	19.7474	34.7583	18.0579	44.7195	24.1657	59.788	18.2519	31.7145	39.2436	25.4349	9.70564	17.2993	15.4506	42.7071	49.0775
hsa-miR-660-3p	MIMAT0022711	0.737021	0.541746	1.18603	0	1.11232	2.38942	0	0	0.79643	0.349008	0.286276	0.705346	1.59799	0	0	1.09353	0	0.679854	1.23736	0	0	0.265188	0.914745	0.632283	0.927518	0.366858	0	0.111611	0	0.60547	0.386296	0	0	0.219416	0	0	0	0	1.63058	0.155999	0	0	1.30435	0	0.480536	0	0.740585	0
hsa-miR-421	MIMAT0003339	7.37021	2.16698	5.33715	3.16123	0.83424	2.38942	1.5882	0	3.18572	1.39603	2.29021	0.705346	0.684852	0	3.16579	4.73863	2.31796	2.03956	6.18678	1.03796	4.62257	2.12151	3.9639	6.53359	5.0086	3.48515	4.13671	4.1296	3.12112	1.21094	4.24926	2.25363	14.0724	3.29123	4.55847	2.67525	5.69157	4.62747	7.06586	1.87199	0	5.41291	2.6087	4.59051	14.4161	0.7023	2.22176	2.40576
hsa-miR-542-5p	MIMAT0003340	1.47404	0	1.18603	2.70962	2.22464	2.98677	0	1.25068	2.38929	1.04702	1.43138	1.41069	3.42426	3.14768	3.69342	1.45804	0.579489	2.03956	3.71207	1.29745	1.73346	1.19335	0	1.05381	2.96806	2.01772	0.998517	0.558054	1.7835	1.21094	0.772593	1.35218	0.865996	0.877664	0	2.00644	2.43925	0.514163	1.63058	1.55999	1.78673	2.43581	4.56523	1.18042	3.36375	0	1.23431	0.721728
hsa-miR-542-3p	MIMAT0003389	172.463	133.269	147.068	296.252	142.099	339.895	123.88	193.23	152.118	102.608	84.7376	100.512	130.35	324.211	101.833	180.797	220.785	180.841	236.335	98.3466	172.769	125.036	57.3241	225.936	263.23	140.69	226.949	192.417	144.017	131.69	114.344	183.446	129.033	148.106	158.977	205.994	105.701	20.0524	132.621	145.859	214.855	234.379	498.914	106.106	363.285	144.674	93.3137	56.2948
hsa-miR-758-5p	MIMAT0022929	3.6851	4.87571	2.96508	19.6448	6.95201	22.1021	3.1764	10.6308	5.57501	5.23512	4.86669	5.99544	12.0991	4.1969	2.11053	2.55157	9.27182	2.71942	6.18678	6.48724	1.15564	0.530376	1.82949	2.73989	6.12162	6.05316	3.70878	2.1206	0	6.35744	6.95333	4.95799	223.644	9.21546	25.0716	1.33763	2.43925	0	5.43528	6.08398	22.3342	1.08258	83.4785	5.11514	12.4939	6.67186	7.15899	1.92461
hsa-miR-758-3p	MIMAT0003879	3.6851	5.41746	6.52318	71.3535	13.0698	51.3725	7.4116	18.7602	6.37144	9.42321	21.1844	9.52216	21.9153	0	3.69342	2.55157	15.6462	19.7158	7.42413	5.96827	1.15564	3.58005	6.70814	6.11207	12.7997	15.0412	7.70284	5.91537	0	14.5313	5.02185	7.21162	116.26	5.48539	66.6676	1.33763	4.06541	3.08498	7.06586	4.67998	50.0285	2.16516	240.001	2.49199	7.20805	7.37416	43.9414	8.90132
hsa-miR-1264	MIMAT0005791	0	0	0	0	0	0	0	0	0	0	0	0	0	0	0	0	0	0	0	0	0	0	0	0	0	0	0.855872	0	0	0	0	0	0	0	0	0	0	0	0	0	0	0	0	0	0	0	0	0
hsa-miR-671-5p	MIMAT0003880	8.84425	5.41746	7.70922	13.5481	7.23009	8.36296	4.2352	6.2534	1.59286	2.79206	5.15297	7.05345	6.16367	9.44303	8.96975	18.59	27.236	4.75898	29.6965	9.08214	8.0895	2.3867	7.9278	12.8564	12.0577	10.8223	4.13671	6.58503	11.5927	4.54103	1.93148	4.95799	3.89698	13.3843	3.41885	3.34406	2.43925	4.1133	6.52233	3.43199	5.3602	10.8258	2.6087	2.62315	9.13019	4.91611	4.93723	5.53325
hsa-miR-671-3p	MIMAT0004819	5.15915	4.33397	5.93017	4.51604	3.33697	4.18148	4.7646	3.75204	3.18572	6.28214	6.01179	7.05345	8.21822	8.3938	4.74869	12.3933	6.95387	4.07912	28.4592	5.1898	2.88911	5.43636	0.914746	4.63674	4.82309	7.52059	3.56613	2.45544	5.35049	3.33009	4.24926	3.60581	3.89698	10.0931	2.27923	0.668813	4.06541	1.54249	4.89175	4.21198	3.12678	8.11936	3.26088	1.57389	12.9745	4.21381	9.6276	3.60864
hsa-miR-668-5p	MIMAT0026636	0	0	0	0	0	0	0	0.62534	0	0	0	0	0	0	0	0	0	0	0	0	0	0	0	0	0	0	0	0	0	0	0	0	0	0	0	0	0	0	0	0	0	0	0	0	0	0	0	0
hsa-miR-668-3p	MIMAT0003881	0	0	0	1.58061	0	0	0	0	0	0	0	0	0	0	0	0	0.579489	0	0	0	0	0	0	0	0	0.366858	0.142645	0	0	0	0	0	3.03099	0	0.569809	0	0	0	0	0	0.446683	0	1.95653	0	0	0	0.246862	0
hsa-miR-550a-3-5p	MIMAT0020925	0	0	1.77905	1.12901	0.834241	0.597354	0.5294	0.62534	0	0.349008	0.286276	1.05802	1.3697	0	0.527632	2.18706	0	0	0	0	1.73346	1.06075	0.914745	0.632283	1.85504	1.10057	0.427935	0.781275	0.891748	0.60547	0.772593	1.80291	1.08249	2.41357	2.84904	4.68169	0.813082	1.02833	1.08706	0.779996	1.34005	1.62387	0	2.62315	0	0.35115	3.94979	0.962304
hsa-miR-767-5p	MIMAT0003882	0.737021	7.0427	0.593017	16.7094	1.66848	0.597354	16.4114	1.25068	46.9894	0.349008	87.0278	1.05802	3.42426	258.109	5.27632	11.6643	146.611	46.9099	118.786	52.4169	17.9125	34.4745	206.733	264.505	18.3649	225.985	0.427936	5.13409	203.765	13.3204	72.6237	16.2262	124.054	1.75533	50.713	0	256.934	239.086	619.078	3.11999	30.3745	89.0423	52.8262	82.6291	10.0913	0	16.5397	172.734
hsa-miR-767-3p	MIMAT0003883	0	0	0	0	0	0.597354	0.5294	0	0.79643	0	2.86276	0	0.456568	2.09845	0.527632	0.36451	4.63591	1.35971	13.6109	3.37337	1.73346	0.928159	3.35407	7.37664	1.29853	7.15373	0	0.111611	2.67524	0	9.27111	0	9.09296	0	3.41885	0	4.87849	6.68412	23.3717	0.467998	0.446683	7.30742	1.30435	7.21365	4.32483	0	0.493723	1.44346
hsa-miR-1224-5p	MIMAT0005458	0	0	2.37207	0.451604	0.55616	2.38942	0.5294	0	0	0	0.572552	0.705346	0.456568	1.04923	10.5526	1.45804	0	0	1.23736	0.77847	1.73346	0	0.60983	11.3811	1.29852	0.550287	0.855872	0.223222	0.445874	0	0	1.35218	23.8149	5.48539	0.569809	0.668813	0	0	1.63058	4.36798	6.70025	0.270645	0.652176	0.393472	2.88322	0.35115	2.22175	0
hsa-miR-1224-3p	MIMAT0005459	0	0	0	0	0	0	0	0	0	0	0	0	0	0	0	0	0	0	0	0	0	0	0	0	0	0	0	0	0	0	0	0	0	0	0	0	0	0	0	0	0	0	0	0	0	0	0	0
hsa-miR-151b	MIMAT0010214	0.737021	3.25047	2.96508	2.48382	2.50272	0.597354	3.7058	2.50136	0.79643	3.14107	1.43138	2.11604	2.28284	4.1969	1.5829	1.45804	1.73847	2.03956	1.23736	3.89235	3.46693	1.06075	0	1.47533	2.59705	0.733716	0.998517	1.0045	0.445874	3.93556	1.93148	3.60581	1.51549	1.09708	3.98866	3.34406	2.43925	1.02833	2.71764	1.87199	4.02015	3.78903	0.652176	0.786944	0.961073	0.35115	1.48117	1.92461
hsa-miR-320b	MIMAT0005792	8.10723	5.41746	5.93017	5.64505	5.83969	3.58413	13.7644	13.1321	6.37144	10.4702	6.01179	6.70078	7.30509	2.09845	4.22106	2.55157	4.63591	6.79854	3.71207	11.1581	2.31128	9.67938	3.9639	11.1703	11.6867	8.98802	5.84846	3.68315	5.35049	6.35744	8.88482	4.50727	6.27847	44.3219	14.815	10.701	11.3831	27.7648	14.1317	8.57997	8.93366	3.24775	5.86958	27.0184	6.24697	22.1225	6.91213	5.0521
hsa-miR-320c	MIMAT0005793	0.737021	0.541746	0.593017	0.451604	1.3904	1.19471	0.5294	1.87602	0	0	0.572552	0.705346	0.456568	0	0.527632	0	0	1.35971	0	1.29745	0	0.397782	1.52458	0.843044	1.29852	0.550287	1.28381	0.558054	0.445874	0.908205	1.54518	0	1.08249	2.19416	1.70943	0	0.813082	2.05665	1.08706	0.935994	0.893366	0.54129	0	3.14778	0.480536	1.4046	0.740586	1.20288
hsa-miR-1296-5p	MIMAT0005794	3.6851	4.87571	1.77905	17.161	4.44929	24.4915	2.647	4.37738	6.37144	3.49008	6.29807	1.76336	6.62024	9.44303	5.27632	29.8898	12.7488	19.7158	21.035	3.11388	5.77821	15.9113	10.9769	13.2779	6.86363	8.62116	12.8381	2.90188	5.35049	3.63282	15.8382	1.80291	9.30946	8.11838	3.41885	4.68169	1.62616	5.14163	10.327	3.58799	1.78673	4.05968	4.56523	4.98398	12.9745	2.8092	32.5857	7.21728
hsa-miR-1296-3p	MIMAT0026637	0.737021	0	0	0	0	0.597354	0	0	0	0	0	0	0	0	0	0	0	0	0	0	0	0	0	0.421522	0	0	0	0	0	0	1.93148	0	0	0	0	0	0	0	0	0	0	0	0	0	0	0	0	0
hsa-miR-1468-5p	MIMAT0006789	3.6851	8.12619	9.48827	4.06444	8.34241	12.5444	1.5882	6.2534	3.18572	4.5371	5.15297	2.11604	5.47881	4.1969	4.22106	13.4869	12.1693	7.47839	2.47471	4.41133	9.82296	3.84523	7.62288	8.21968	1.29852	1.65086	2.99555	5.2457	15.1597	3.63282	3.47667	2.25363	18.1859	20.4056	0	0.668813	5.69157	3.08498	10.327	5.30398	7.14693	10.2845	12.3913	1.57389	8.64965	0.35115	4.69037	6.0144
hsa-miR-1468-3p	MIMAT0026638	0	0	0	0	0.27808	0	0	0	0	0	0	0	0	0	0	0	0	0	0	0	0	0	0	0	0	0	0	0	0	0	0	0	0	0	0	0	0	0	0	0	0	0	0	0	0	0	0	0
hsa-miR-1323	MIMAT0005795	0	0	0	0	0	0	0	0	0	0	0	0	0	0	0	0	0	0	0	1.03796	0	0	0	0	0	0	0	0.334832	0	0	0	0	0	0	0	0	272.382	0	0.543528	0.467998	0	0	0	0	0	0	0	0
hsa-miR-1271-5p	MIMAT0005796	10.3183	8.12619	7.1162	9.93529	5.83969	8.96032	6.8822	5.62806	9.55716	3.14107	5.15297	1.76336	5.7071	10.4923	4.74869	8.01922	8.11285	13.5971	17.323	5.96826	8.0895	1.59113	3.9639	6.32283	1.85503	12.6566	4.27936	1.56255	5.35049	3.63282	3.09037	5.85945	0.865996	3.94948	15.3848	7.35694	1.62616	3.08498	15.2188	0.935997	8.0403	24.6287	8.47829	2.88546	4.80536	2.45805	7.65271	2.16519
hsa-miR-1301-5p	MIMAT0026639	0	0.541746	0	0	0.27808	1.79206	0	0.62534	0.79643	0.698016	1.1451	0.705346	0.228284	1.04923	0	1.09353	2.31796	0	4.94942	0.25949	0.577821	0.265188	0	1.26457	0.556512	0.550287	0.427935	0.111611	0	0.908205	0.386296	0	1.51549	1.09708	0	0.668813	0	0.514163	0.543528	0.311999	0.893366	0	0.652176	0.393472	3.36375	0.702301	0.246862	0.240576
hsa-miR-1301-3p	MIMAT0005797	14.0034	13.0019	23.1277	17.161	10.5671	29.2704	10.0586	6.87874	3.18572	6.63115	24.3334	14.1069	14.1536	30.4275	29.5474	48.8443	52.7335	12.9172	75.4787	28.5439	27.7354	18.5632	23.4785	22.1299	40.2543	10.6389	8.27343	24.4427	18.7267	8.77932	15.4519	10.8174	17.3199	40.1531	18.2339	15.3827	7.31774	26.2223	24.4587	15.1319	14.7405	24.3581	3.91306	48.1347	19.2215	4.91611	15.0586	12.2694
hsa-miR-454-5p	MIMAT0003884	1.47404	1.08349	0	0.677406	1.11232	0	2.647	0	0.79643	0.349008	1.1451	0.705345	0.456568	2.09845	0	1.09353	0.579489	0.679854	0	0.51898	0	0.397782	0.914745	3.7937	0.371008	0.366858	0.998517	0.781275	0.445874	0	1.15889	0	1.73199	2.8524	1.13962	0	1.62616	0	1.08706	0.623998	0.893366	1.35323	0	0.524629	0.961073	1.05345	0.246862	0.240576
hsa-miR-454-3p	MIMAT0003885	11.7923	11.3767	11.8603	15.1287	8.62049	17.3233	8.4704	3.75204	11.15	7.32917	4.29414	11.9909	3.88083	15.7384	11.6079	17.861	11.5898	13.5971	13.6109	16.3479	12.1342	8.48603	7.01305	11.5919	4.82309	5.13601	7.27491	9.04047	6.24224	8.17385	7.33963	4.50727	4.97948	12.9455	8.54713	26.0837	13.0093	30.8498	5.97881	3.89999	11.6138	14.3442	7.17393	7.60712	4.32483	7.02301	8.64016	7.69844
hsa-miR-1185-5p	MIMAT0005798	0.737021	0	0	0.677406	0	0.597354	0.5294	0	0	0.698016	0	0.352673	0.913136	0	0	0	1.15898	0	0	0	0	0	0	0.421522	0.185504	0.366858	0	0	0	0	0	0	0.865996	0	2.27923	0	0	0	0	0.155999	1.78673	0	3.26088	0	0	0	0.246862	0.240576
hsa-miR-1185-2-3p	MIMAT0022713	0	0	0	0.451604	0	0.597354	0	0	0	0	0	0	0	0	0	0	0.579489	0	0	0	0	0	0	0	0	0.183429	0	0	0	0	0	0	0.649497	0	0	0	0	0	0	0	0	0	0	0	0	0	0	0
hsa-miR-449c-5p	MIMAT0010251	0	0	0	0	0.27808	0	0	0	0	2.09405	0.286276	0	0	0	0	0.36451	0	0	0	0	0.577821	0	0	0	0	0	0	0	0.891748	0.302735	0.386296	0	0	0	0	0.668813	0	0	0.543528	0.155999	0	0	0	0.262314	0.480536	0	0.246862	0
hsa-miR-449c-3p	MIMAT0013771	0	0	0	0	0	0	0	0	0	0	0	0	0	0	0	0	0	0	0	0	0	0	0	0	0	0	0	0	0	0.302735	0	0	0	0	0	0	0	0.514163	0	0	0	0	0	0	0	0	0	0
hsa-miR-1283	MIMAT0005799	0	0	1.18603	0	0.27808	0.597354	0	0	0	0.349008	0	0	0.228284	0	0	0	0	0	0	0.25949	0	0	0	0	0	0	0	0	0	0	0	0	0	0	0.569809	0	160.177	0	1.08706	0.623997	0	0	0	0	0	2.8092	0	0
hsa-miR-769-5p	MIMAT0003886	33.1659	29.2543	10.6743	61.1924	21.1341	63.3196	28.5876	15.6335	48.5822	15.3563	55.8238	21.8657	30.8183	73.4458	51.1803	58.3216	35.3488	61.1869	191.79	36.8476	68.1829	38.7175	21.9539	38.1477	16.3243	29.7155	71.7506	18.9738	65.5435	16.9532	20.0874	19.832	20.5674	28.9629	29.0602	24.0773	27.6448	34.9631	82.6162	19.3439	48.2418	42.4913	77.6089	57.8404	39.404	14.046	23.4519	12.51
hsa-miR-769-3p	MIMAT0003887	2.21106	3.25048	2.37207	6.99987	0.55616	4.18148	1.5882	1.87602	2.38929	1.39603	7.44317	1.76336	1.3697	4.1969	5.27632	9.47725	4.63591	7.47839	28.4592	3.37337	3.46693	4.24301	2.74424	5.05826	1.48403	3.30172	4.7073	2.67866	7.13399	0.908206	3.86296	1.35218	1.94849	4.82714	0	1.33763	0.813082	1.02833	10.327	3.27599	3.57347	4.05968	3.91306	3.80356	7.20804	0.7023	2.96234	0.721728
hsa-miR-766-5p	MIMAT0022714	0	0	0.593017	0.451604	0	0	0	0	0	0	0	0	0	0	0	0	0	0	0	0	0	0	0	0	0.371008	0	0	0	0	0	0	0	0	0	0	0.668813	0	0	0	0	0	0	0	0	0	0	0.493724	0
hsa-miR-766-3p	MIMAT0003888	28.0068	9.75142	10.6743	20.9996	10.289	25.6862	4.7646	7.50408	15.1322	21.2895	14.8863	2.46871	16.893	6.29535	8.96974	6.19667	22.0206	6.79854	9.89885	7.7847	8.0895	4.11042	7.62288	10.1165	27.0835	5.31944	10.1278	8.92886	1.7835	6.05471	15.8382	3.60581	4.97948	6.58247	5.69809	6.01931	9.75698	13.3682	4.89175	19.3439	9.38035	3.24774	3.91305	3.01662	16.3382	12.6414	37.2761	8.66074
hsa-miR-378d	MIMAT0018926	2.94808	1.08349	0.593017	0.225802	0.55616	0	0	0	0.79643	0	2.00393	1.76336	2.05456	1.04923	0	0.36451	0.579489	0	1.23736	0	2.31129	0.66297	0.60983	0.632283	0	1.10057	0.713227	0.892885	0.445874	0	0	0.450727	0.216499	0	1.70943	0	0.813082	0.514163	0	0.311998	0.446683	2.16516	0	0.131157	0	0	1.23431	0.240576
hsa-miR-1185-1-3p	MIMAT0022838	0	0	0	0.451604	0.27808	0.597354	0	0	0	0	0	0	0	0	0	0	0	0	0	0	0.577821	0	0	0	0.371007	0	0.28529	0.223221	0	0	0	0	3.03099	0	1.70943	0	0	0	0	0	0	0	5.86958	0.131157	0	0	0	0.240576
hsa-miR-802	MIMAT0004185	0	0	0	0	0	0	0	0	0	0	0	0	0	0	0	0	0	0	0	0	0	0	0	0	0	0.183429	0	0	0	0	0	0	0	0	0	0	0	0	0	0	0	0.541291	0	0	0.480536	0	0	0
hsa-miR-670-5p	MIMAT0010357	0	0	0	0	0	0	0	0	0	0	0	0	0	0	0	0	0	0	0	0.25949	0	0	0	0	0	0	0	0	0	0	0	0	0	0	0	0	0	0	0	0	0	0	0	0	0	0	0	0
hsa-miR-670-3p	MIMAT0026640	0	0	0	0	0	0	0	0	0	0	0	0	0	0	0	0	0	0	0	0.25949	0	0	0	0	0.185504	0	0	0	0	0	0	0	0	0	0	0	0	0	0	0	0	0	0	0	0	0	0	0
hsa-miR-1298-5p	MIMAT0005800	0	0	0	0	0	2.98677	0.5294	0	0	0	0.286276	0	0	0	0	0	0	0	0	0	0	0	0	0	0	0	56.7728	0.111611	0	0	2.70407	0	0.432998	0	0	0	0	0	0	0	0	0	9.13046	0	0	0	0.246862	0
hsa-miR-1298-3p	MIMAT0026641	0	0	0	0	0	0	0	0	0	0	0	0	0	0	0	0	0	0	0	0	0	0	0	0	0	0	17.688	0	0	0	4.63556	0	0	0	0	0	0	0	0	0	0	0	4.56523	0	0	0	0	0
hsa-miR-2113	MIMAT0009206	0	0	0.593017	0	0	0	0	0	0	0	0	0	0	0	0	0	0	0	1.23736	0	0	0	0	0	0	0	0	0	0	0	0.386296	0	0.216499	0	0	0	0	0.514163	0	0	1.34005	0	0	0.786944	0.480536	0	0.740585	0.240576
hsa-miR-761	MIMAT0010364	0	0	0	0	0	0	0	0	0	0	0	0	0	0	0	0	0	0	0	0	0	0	0	0	0	0	0	0	0	0.302735	0	0	0	0	0	0	0	0	0	0	0	0	0	0	0	0	0	0
hsa-miR-765	MIMAT0003945	0	0	1.18603	0	0.27808	0	0.5294	1.25068	0	0	0	0.352673	0.456568	0	0	0	0	0.679854	1.23736	0.25949	0	0.132594	0	0.210761	0.556512	0.183429	0	0.446443	0	0	0	0	0.865996	0.877664	0	0.668813	0	0	0	0.311998	0.446683	0.270645	0	0	0.480536	0	0.246862	0
hsa-miR-770-5p	MIMAT0003948	0	0	0.593017	0.677406	0	0	0	0	0	0	0	0	0	0	0	0	0	0	0	0	0	0	0	0	0	0.183429	0	0	0	0	0	0	3.24749	0	0.569809	0	0	0	0	0	0	0	1.30435	0	0	0	0	0
hsa-miR-675-5p	MIMAT0004284	0	0	0	0	0	0.597354	0	0	0	0	0	0	0	0	0	0	4.63591	0	0	0	0.577821	0	0.304915	0	3.15356	0	0	0	0	0	0	0	1.94849	0	0.569809	0	0.813082	0	0	0	0	0	0.652176	0	0	0	0	0
hsa-miR-675-3p	MIMAT0006790	8.10723	16.2524	7.1162	17.3868	25.8615	45.9963	23.2936	30.0163	5.57501	4.5371	9.73338	4.93742	42.0043	97.578	5.27632	12.0288	1874.65	19.0359	28.4592	8.82265	378.473	3.44745	5.79339	7.5874	796.367	24.7629	27.9585	3.45993	341.094	7.26565	16.2244	3.60581	203.726	2.63299	274.648	1.33763	928.539	7.71244	7.60939	2.18399	16.5273	26.7939	279.783	0.262314	6.24697	2.1069	14.8117	24.2982
hsa-miR-891a-5p	MIMAT0004902	5.15914	233.492	33.802	12.6449	9.73281	43.0095	1.0588	3.1267	7.16787	24.4306	100.769	3.52673	35.8406	23.083	46.9593	285.776	876.188	12.2374	1806.54	2.85439	26.002	2.12151	0.304915	387.589	2.04054	0.733716	0.570581	25.0008	34.3323	128.965	28.1996	19.832	57.5888	2.41357	0.569809	0.668813	3.25233	0	3.26117	35.5679	25.0143	53.5878	2.6087	2.62315	189.331	0	2.22175	1.20288
hsa-miR-891a-3p	MIMAT0026717	0	0.541746	0	0	0	0	0	0	0	0	0	0	0	0	0	0	0	0	0	0	0	0	0	0.210761	0	0	0	0	0	0	0	0	0	0	0	0	0	0	0	0	0	0	0	0	0	0	0	0
hsa-miR-892a	MIMAT0004907	0	0.541746	0.593017	0.225802	0	1.19471	0	0.62534	0	0	2.29021	0	0	0	0	2.55157	20.8616	0.679854	13.6109	0	0.577821	0	0	8.6412	0	0	0	0.892886	0	2.11915	0.386296	0	1.51549	0	0	0	0	0	0	0.155999	0	0.811936	0	0	0.961072	0	0.493723	0
hsa-miR-450b-5p	MIMAT0004909	25.7957	15.1689	13.0464	37.2574	13.3479	57.9434	7.941	11.2561	8.76073	8.7252	2.00393	7.40613	7.98994	26.2306	15.829	32.0769	35.3488	33.9927	51.9689	17.3858	26.002	4.77339	4.26881	17.7039	22.4459	9.53831	13.1234	11.3843	10.2551	8.47659	5.40815	7.21162	9.95896	8.77662	28.4904	14.7139	3.25233	0.514163	6.52233	6.39598	15.6339	73.8862	66.5219	9.57448	17.7798	8.07646	5.1841	6.0144
hsa-miR-450b-3p	MIMAT0004910	0	0	0	0	0	0	0	0	0	0	0	0	0	0	0	0	0	0	0	0	0	0.132594	0	0	0	0	0	0	0	0	0	0	0	0	0	0	0	0	0	0	0.446683	0	0	0	0	0	0	0
hsa-miR-874-5p	MIMAT0026718	1.47404	0	1.77905	2.03222	0.556161	0	0	0.62534	0	1.39603	2.00393	0.705346	0.913136	1.04923	0.527632	2.55157	0	2.71942	2.47471	1.29745	2.31128	0.397783	0	0.632283	0.742014	0.366858	0.142645	0.334832	0	0.302735	0	0.901453	0	0	1.13962	0.668813	0	0.514163	0	0.623997	0	0.811936	0.652176	0.655787	0	0	1.48117	0.240576
hsa-miR-874-3p	MIMAT0004911	14.7404	15.7106	29.0578	43.8056	33.9258	54.9566	7.941	24.3883	11.9465	12.5643	55.8238	10.5802	57.7558	17.8368	33.7685	127.214	37.0873	46.2301	69.2919	92.3784	60.0934	26.3863	38.4193	40.6769	23.1879	22.9286	14.2645	8.92886	16.4973	12.4121	20.86	17.1276	25.7634	33.3512	4.55847	7.35694	6.50465	4.1133	34.2422	27.2999	21.8875	34.1013	11.087	21.5098	25.949	5.61841	43.6945	30.3126
hsa-miR-890	MIMAT0004912	0	0	0	0	0	0	0	0	0	0	0	0	0	0	0	0	0.579489	0	0	0.25949	0	0	0	0	0	0	0	0	0	0	0	0	0	0	0	0	0	0	0	0	0	0	0	0	0	0	0	0
hsa-miR-891b	MIMAT0004913	0	3.79222	0	0.225802	0.27808	0	0	0	0	0	0.286276	0	0.228284	0	1.05526	7.29019	13.9077	0	22.2724	0.25949	0.577821	0	0	4.8475	0	0	0	0.111611	0.891748	2.72462	0.386296	0	0	0	0	0	0	0	0	0	0.446683	2.43581	0	0	0.961073	0	0	0
hsa-miR-888-5p	MIMAT0004916	0	0.541746	0.593017	0.451604	0	0	0	0	0	0.698016	0.572552	0	0	0	0	0.36451	8.69234	0	4.94942	0	0	0	0	3.37218	0.185504	0	0	0	0	0.908206	0.386296	0	0.216499	0	0	0.668813	0	0	0	0	0	0	0	0	0.480536	0	0.246862	0
hsa-miR-888-3p	MIMAT0004917	0	0	0	0	0	0	0	0	0	0	0	0	0	0	0	0.729019	0	0	0	0	0	0	0	0	0	0	0	0	0	0	0	0	0	0	0	0	0	0	0	0	0	0	0	0	0	0	0	0
hsa-miR-892b	MIMAT0004918	0	0.541746	0	0	0	0	0	0	0	0	0.286276	0	0	0	0.527632	0.36451	5.2154	0	3.71207	0	0	0	0	1.05381	0	0	0	0	0	0	0	0	0.432998	0	0	0	0	0	0	0	0	0	0	0	0.480536	0	0	0
hsa-miR-541-5p	MIMAT0004919	0	0	0	0.677406	0	0	0.5294	0	0	0	0	0.352673	0	0	0	0	0	0	0	0	0	0	0	0	0	0	0	0	0	0	0	0	2.16499	0.219416	0.569809	0	0.813082	0	0	0	0	0	0	0	0	0	0	0
hsa-miR-541-3p	MIMAT0004920	0	0.541746	0.593017	15.3545	0	3.58413	0	0	0	0.349008	0	0	0	0	0	0	1.15898	0	0	0	0	0.132594	0	0	0.556511	0	0	0	0	0.302735	1.54519	0	33.1244	0.219416	3.41885	2.00644	0	0.514163	0	0.311998	3.12678	0.270645	16.3044	0.131157	0	0.35115	0.493724	0
hsa-miR-889-5p	MIMAT0026719	0	0	0	0	0	0	0	0	0	0	0	0	0	0	0	0	0	0	0	0	0	0	0	0	0.185504	0.183429	0	0	0	0	0	0	0.432998	0	0	0	0	0	0	0	0	0	0	0	0	0	0	0
hsa-miR-889-3p	MIMAT0004921	11.7923	9.75142	11.8603	62.773	6.11777	33.4518	13.235	23.1376	12.7429	11.5173	10.0197	9.16949	10.0445	1.04923	6.33158	2.91608	20.8616	9.51796	2.47471	5.96827	1.15564	3.18226	8.53763	10.5381	18.3648	23.8458	13.5513	14.2862	1.7835	11.8067	12.7478	12.6203	235.768	6.14364	142.452	1.33763	6.50465	1.02833	13.0447	6.08398	44.2216	8.9313	486.523	3.14778	7.20805	9.48106	22.4644	9.62305
hsa-miR-875-5p	MIMAT0004922	0	0	0	0	0	0	0	0	0	0	0	0	0	0	0	0	0.579489	0	0	0	0	0	0	0	0	0	0	0	0	0	0	0	0	0	0	0	0	0	39.134	0	0	0	0	0	0	0	0	0
hsa-miR-875-3p	MIMAT0004923	0	0	0	0	0	0	0	0	0	0	0	0	0	0	0	0	0	0	0	0	0	0	0	0	0	0	0	0	0	0	0	0	0	0	0	0	0	0	65.7668	0	0	0	0	0	0	0	0	0
hsa-miR-876-5p	MIMAT0004924	0	0	0	0.451604	0.27808	0	0.5294	0.62534	0	0	0	0	0	0	0	0	0.579489	0	0	0	0	0	0.304915	1.89685	0	0.183429	0.142645	0	0.891748	0	0	0	0.649497	0	0	0	0	0	0	0.311999	0	0	0	1.04926	0	0	0	0
hsa-miR-876-3p	MIMAT0004925	0	0	0	1.58062	0	0.597354	0	0	0	0	0	0	0.228284	0	0	0.729019	1.15898	0.679854	0	0	0	0.397782	0	0.632283	0	0	0	0.111611	0	0	0	0	0.649497	0	0	0	0	0	0	0	0	0	0	1.18041	0	0	0	0.240576
hsa-miR-708-5p	MIMAT0004926	190.888	194.487	84.8014	249.286	126.805	117.679	276.876	125.068	234.15	83.4129	94.7573	136.132	118.936	201.451	201.555	201.938	147.77	279.42	157.144	123.517	594	176.085	153.067	200.012	56.7641	150.045	285.861	104.802	72.6775	178.614	66.8293	102.315	79.0222	31.5958	481.488	15.3827	13.8224	267.365	63.0492	34.4759	317.145	220.576	168.914	36.3306	98.0294	108.154	58.7531	49.7993
hsa-miR-708-3p	MIMAT0004927	300.704	457.234	157.742	429.927	232.475	243.123	397.579	203.236	407.772	102.259	304.597	150.591	291.519	558.188	356.679	484.433	304.811	444.625	624.865	202.402	1267.16	959.187	340.285	468.522	94.9778	386.118	566.73	151.791	92.296	190.723	154.132	274.492	232.304	57.048	360.119	16.7203	21.9532	166.075	47.8304	71.6037	807.157	419.771	281.088	42.1015	257.567	130.979	171.075	153.488
hsa-miR-147b	MIMAT0004928	3.6851	0	0.593017	0.225802	3.33696	0.597354	0.5294	0.62534	2.38929	6.63115	2.29021	3.52673	1.14142	2.09845	1.05526	0	2.31796	1.35971	2.47471	0.51898	1.73346	0.928159	0.60983	0.632283	2.41155	0.183429	0.713226	2.56705	1.33762	0.302735	0.386296	3.15509	0.865996	0	1.70943	6.01931	1.62616	2.05665	0	0.623998	0.446683	0	2.6087	0	0	1.05345	2.46862	0.721728
hsa-miR-190b	MIMAT0004929	0.737021	0	0	1.12901	4.17121	0	2.1176	0	0	2.09405	2.57648	1.41069	0	1.04923	0	0.36451	2.31796	2.03956	0	0	4.62257	1.59113	0.304915	1.05381	1.11302	0.366858	0	0	0.891748	1.21094	0	0	0.216499	0.219416	0.569809	1.33763	0	4.1133	0	0	0.446683	2.43581	1.30435	0	0	0	0.246862	0.481152
hsa-miR-744-5p	MIMAT0004945	30.2178	18.9611	12.4534	24.3866	16.9629	25.0889	9.5292	11.2561	11.15	19.1954	47.2355	5.29009	32.8729	36.7229	22.1605	31.3478	20.2821	38.0718	85.3775	13.753	12.1342	34.8723	39.639	42.5737	71.7899	39.8041	39.3701	15.6255	20.9561	9.68753	21.6326	9.46526	76.4242	73.2848	14.2452	12.0386	13.8224	24.1657	21.1976	24.1799	28.141	24.3581	22.174	22.2967	71.5999	22.4736	37.2761	15.3969
hsa-miR-744-3p	MIMAT0004946	25.0587	86.1376	19.5696	38.6122	19.4656	53.1645	20.6466	25.0136	38.2286	21.2895	20.8981	12.3435	26.7092	152.138	25.854	66.3408	54.472	82.2623	168.28	15.0504	41.0253	36.1982	30.7964	35.1971	24.8575	81.8093	23.6791	2.45544	61.5306	13.9258	37.857	40.5654	80.7542	37.7395	21.6527	8.02575	30.084	14.9107	28.2634	11.544	57.1755	55.7529	71.0872	37.511	114.368	28.4432	43.9414	23.0953
hsa-miR-885-5p	MIMAT0004947	0	0	0.593017	0	0	2.38942	0.5294	0	0	0.698016	1.43138	1.05802	0.684852	0	0.527632	0	0	1.35971	1.23736	1.29745	0	0.397782	1.21966	0.421522	0.742015	0	0.28529	0.669664	0	0.908206	1.15889	0	0.216499	5.48539	0	0	4.06541	0	0	0.467998	0.893366	0.541291	0	0	0	0	0.493723	0
hsa-miR-885-3p	MIMAT0004948	0	0	0	0	0	0	0	0	0	0	0	0	0	0	0	0	0	0	0	0	0	0	0	0	0	0	0	0	0	0	0	0	0	0.219416	0	0	0	0	0	0.155999	0	0	0	0	0	0	0	0
hsa-miR-877-5p	MIMAT0004949	9.58127	0.541746	0.593017	4.74184	1.11232	3.58412	0.5294	3.75204	0.79643	1.39603	2.29021	2.11604	1.14142	5.24613	2.63816	2.18706	2.89744	2.03956	14.8483	2.07592	1.73346	4.90599	6.40322	5.05826	9.27518	0.917145	2.99555	2.00899	5.79636	0.302735	1.15889	0.450727	6.49497	4.38831	9.11694	6.68813	0.813082	2.57082	3.80469	2.33999	4.02015	4.60097	0	3.27893	6.72751	1.05345	2.71548	1.44346
hsa-miR-877-3p	MIMAT0004950	0	0	0	0.225802	0.27808	1.19471	0	0	1.59286	0	0.858827	0.352673	0.228284	0	0.527632	0	1.15898	0	3.71207	0	0	0.265188	0	0.210761	1.11302	0.550287	0.285291	0.334832	0.891748	0	0.386296	0	1.73199	0.658247	0	0.668813	0	0	0.543528	0	0.446683	0.270645	0	0.262315	0.480536	0	0.493723	0
hsa-miR-887-5p	MIMAT0026720	0	0	0	0.225802	0.55616	0	0	1.87602	0	0.349008	0	0.705345	0.228284	0	0.527632	0.36451	3.47693	0	2.47471	0.25949	0	0.132594	0.304915	0.210761	0.371008	0.366858	0.142645	0.558054	0.445874	0.302735	0.386296	1.35218	0.432998	0.658247	0	0	0	0	0	0.155999	0.893366	0	0	0.131157	0	0.35115	1.23431	0
hsa-miR-887-3p	MIMAT0004951	5.89617	1.62524	4.15112	10.1611	10.8451	5.97354	2.1176	8.12942	2.38929	3.83909	4.29414	10.5802	4.56568	0	1.5829	2.18706	137.918	3.39927	2.47471	5.96827	5.77821	1.85632	1.82949	3.37218	3.71007	1.284	2.71026	1.89738	7.13399	3.33009	0.772592	1.80291	2.38149	3.73006	4.55847	2.00644	0.813082	3.59914	2.71764	1.55999	9.82703	2.16516	3.26088	5.90208	1.44161	1.4046	4.69037	6.97671
hsa-miR-665	MIMAT0004952	0	0	0	1.35481	0.83424	0	0	0	0	0.349008	0	0	0.228284	0	0	0	0.579489	0	1.23736	0	0	0	0.304915	0.210761	0.185504	0.366858	0.28529	0.111611	0	0.302735	0	0.450727	5.41248	0.438832	0	0	0	0	0	0	0.893366	0	3.91305	0.131157	0	0	0	0.240576
hsa-miR-873-5p	MIMAT0004953	0	0	0	4.51604	0.55616	0	0.5294	0	0.79643	0.349008	0	0.705346	0	0	1.5829	4.37412	0.579489	0.679854	0	0.25949	0	0.397782	0.60983	9.27348	0	0	0.427936	0.223222	3.12112	0.302735	0	0	11.691	0.438832	0	0	0	0	0	0.311999	0.446683	1.08258	1.30435	5.24629	0	0	0.246862	0
hsa-miR-873-3p	MIMAT0022717	0	0	0	0.451604	0	0	0	0	1.59286	0	0	0	0	0	0	0.72902	0	0	0	0	0	0	0.304915	3.58294	0	0	0.427936	0.223222	0.445874	0	0	0	4.32998	0	0	0	0	0	0	0.155999	0.446683	0.541291	0	3.41009	0	0	0	0
hsa-miR-543	MIMAT0004954	0	0	1.77905	4.51604	0.834241	4.18148	0.5294	2.50136	0.79643	0	1.1451	0.705345	1.3697	0	1.05526	0	0.579489	0.679854	1.23736	0.778469	0.577821	0	0	0.210761	0.742015	0.733716	0.142645	0.446443	0	0.908206	0.386296	0.901454	13.4229	0.658247	8.54713	0	0	0.514163	1.08706	0	9.38035	0	3.26088	0.131157	0.480536	1.05345	0.987447	0.481152
hsa-miR-374b-5p	MIMAT0004955	98.0238	72.5939	68.1969	36.5799	52.8353	44.8016	62.9986	50.0272	45.3965	59.3313	50.0983	55.7223	56.8427	80.7904	50.6527	90.3984	53.8925	64.5861	59.3931	44.8917	51.4261	29.0381	53.3602	105.38	124.287	93.1819	62.336	63.9529	68.2188	71.4455	27.427	48.6785	72.5272	80.9643	56.9809	63.5372	65.8596	90.4927	148.383	39.1559	45.115	74.6981	73.6959	45.5116	35.5597	59.3444	64.6778	62.3092
hsa-miR-374b-3p	MIMAT0004956	5.89616	1.62524	3.5581	2.48382	2.7808	1.79206	1.0588	1.25068	3.18572	2.44306	0.858827	2.11604	1.82627	3.14768	2.11053	5.83216	2.31796	4.07912	6.18678	3.37337	1.73346	1.06075	2.13441	1.47533	2.22604	3.66858	2.13968	1.89738	2.22937	2.72462	1.93148	1.80291	4.97948	4.60773	6.8377	6.01931	1.62616	3.59914	4.89175	2.33999	0.446683	2.9771	2.6087	2.09852	1.92214	1.75575	2.96234	2.40576
hsa-miR-760	MIMAT0004957	2.21106	3.25047	0	15.1287	1.11232	2.38942	0.5294	0.62534	0	0.698016	3.43531	4.93742	1.82627	9.44303	3.69342	10.9353	6.37438	2.71942	18.5603	3.11388	1.73346	9.41419	0.914745	9.90577	3.52457	1.65086	1.99703	0.446444	5.79636	0.60547	5.40815	0	44.3823	7.67955	1.13962	6.01931	0.813082	5.14163	5.43528	3.89999	2.23341	5.41291	0.652176	6.55786	7.20804	1.4046	5.67782	1.20288
hsa-miR-301b	MIMAT0004958	2.94808	2.70873	1.18603	3.61284	0.27808	7.76561	0.5294	1.25068	0.79643	0.698016	0.286276	2.82138	0.684852	12.5907	2.63816	11.6643	11.0103	4.75898	8.66149	1.03796	4.04475	2.65188	0.914745	4.42598	1.29852	2.20115	1.85439	0.892885	10.701	1.21094	0.386296	2.25363	3.03099	3.94948	3.41885	0	0.813082	6.68412	8.15292	0.623997	4.91351	1.08258	1.95653	2.88546	3.84429	0.35115	1.72803	1.68403
hsa-miR-216b-5p	MIMAT0004959	2.21106	0.541746	0	0.225802	0	5.97354	0	0.62534	0.79643	0.349008	0.286276	0.352673	0	0	0	0	0	0	0	0.51898	0	0.132594	0	0.210761	0	0	0.570581	0.111611	0	0	0.772593	0	0.432998	0	0	0	0	0	0	0.155999	0.893366	2.43581	0	0.393471	0	0.35115	0.246862	0
hsa-miR-216b-3p	MIMAT0026721	0	0	0	0	0	0	0	0	0	0	0	0	0	0	0	0	0	0	0	0	0	0	0	0	0	0	0	0	0	0	0	0	0	0	0	0	0	0	0	0	0	0	0	0	0	0	0	0
hsa-miR-208b-3p	MIMAT0004960	0	0	0	0	0	0	0	0	0	0	0	0	0	0	0	0	0	0	0	0	0	0	0	0	0	0	0	0	0	0	0	0	0	0	0	0	0	0	0	0	0	0	0	0	0	0	0	0
hsa-miR-509-3-5p	MIMAT0004975	0	1.08349	0	0.451604	0	0	0	0	0	0	1.1451	0	1.82627	0	0	3.6451	0	12.9172	4.94942	0.25949	0	0	0	23.6052	0	0	0.142645	1.11611	0	0.605471	1.15889	0	2.59799	0	0	0	0	0	0	2.18399	0	0	0	1.18041	8.64965	0.35115	0	0.481152
hsa-miR-933	MIMAT0004976	0	0	0	0	0	0	0	0	0	0	0	0	0	0	0	0	0	0	0	0	0	0	0	0	0	0	0	0	0	0	0	0	0	0	0	0	0	0	0	0	0	0	0	0	0	0	0	0
hsa-miR-934	MIMAT0004977	0.737021	0	0	0.225802	0	8.96032	0	0	11.9465	0.698016	0.572552	10.9329	0.684852	0	0	0	0.579489	0	0	0.25949	2.88911	1.19335	0	0	0	0	0.998517	1.78577	4.90462	0	0.772593	0.450727	1.29899	0.219416	0.569809	43.4728	0	1.54249	0	0.311998	0	0.270645	0	1.8362	0	0.702301	7.89957	0
hsa-miR-935	MIMAT0004978	0	0.541746	1.77905	1.58061	0.556161	1.79206	0.5294	0	1.59286	0.349008	3.72159	0.705346	1.59799	0	0.527632	0.36451	0	0.679854	0	7.78469	0	0.132594	0	0.210761	1.85504	0.366858	0.713227	3.68315	0.891748	0.60547	10.8163	0.901453	1.08249	32.9123	5.69809	14.0451	0	0.514163	2.71764	1.71599	3.12678	1.35323	0	0.655786	0.480536	0.7023	0.493724	0
hsa-miR-936	MIMAT0004979	0.737021	0	0	0	0	0	0	0	0	0	0	0	0	0	0	0	0	0	0	0	0	0	0	0	0	0	0	0	0	0	0	0	0	0	0	0	0	0	0	0	0	0	0	0	0	0	0	0
hsa-miR-937-5p	MIMAT0022938	0	0	0	0.225802	0	0	0.5294	0	0	0	0	0	0	0	0	0	0	0	0	0	0	0	0	0	0.927518	0	0.142645	0.223222	0	0	0	0	0	0.219416	0	0	0	0	0	0	0	0	0	0	0	0.702301	0	0
hsa-miR-937-3p	MIMAT0004980	1.47404	1.08349	2.96508	1.80642	1.66848	0.597354	4.2352	0	3.18572	4.88611	1.71765	5.29009	4.56568	3.14768	1.5829	1.45804	9.85131	1.35971	8.66149	2.07592	1.73346	10.8727	0.304915	2.95065	51.7555	6.78687	3.70878	3.45993	0	0.605471	16.6107	0	4.97948	1.75533	7.40751	0.668813	1.62616	0.514163	0.543528	2.49599	0.446683	1.08258	0.652176	4.72166	1.44161	2.1069	1.72803	3.60864
hsa-miR-938	MIMAT0004981	0	0.541746	0	0	0	0	0	0	0	0	0	0	0.228284	0	0	0	0	0	0	0	0	0	0	0.632283	0.185504	0.183429	0	0.111611	0	0	0	0	0	0	0.569809	0.668813	0	0.514163	0	0	0.446683	0.270645	0	0.262315	0	0	0	0
hsa-miR-939-5p	MIMAT0004982	0.737021	1.08349	0.593017	3.83864	1.11232	3.58412	1.5882	1.25068	0	1.39603	1.43138	1.05802	2.73941	2.09845	0.527632	1.82255	1.15898	0	2.47471	1.81643	0	2.51929	0.914745	1.05381	0.927519	1.83429	0.28529	0.558055	0.445874	1.51368	4.24926	0.450727	1.29899	2.41357	5.12828	0	0.813082	1.02833	0.543528	2.02799	2.6801	1.89452	0	2.09852	2.88322	1.75575	1.48117	0.721728
hsa-miR-939-3p	MIMAT0022939	0.737021	0	0	0	0	0.597354	0	0	0	0	0	0	0	0	0	0	0	0	0	0	0	0	0	0	0	0.183429	0	0.111611	0	0	0	0	0	0	0	0	0	0.514163	0	0	0	0	0	0	0	0	0	0
hsa-miR-940	MIMAT0004983	4.42212	1.08349	2.37207	20.9996	5.00545	3.58413	4.2352	3.75204	3.18572	2.44306	4.29414	3.52673	4.3374	7.34458	7.91448	4.73863	17.3847	0.679854	8.66149	4.67082	14.4455	16.7069	2.13441	11.8026	4.26658	5.13601	5.70581	2.23221	7.57986	1.81641	7.72593	0.450727	8.22696	10.9708	3.98866	2.00644	0.813082	1.54249	5.43528	3.27599	3.12678	1.35323	3.26088	24.9199	17.7798	4.2138	3.70293	3.36807
hsa-miR-942-5p	MIMAT0004985	8.84425	15.1689	9.48827	8.12888	6.95201	13.7392	2.647	6.87874	9.55716	3.49008	4.58042	3.52673	7.30509	22.0337	6.85922	20.7771	3.47693	21.0755	11.1362	8.82265	38.714	9.41419	8.84254	15.8071	4.45209	17.6092	15.5483	6.36181	4.01287	4.23829	10.0437	7.21163	16.6704	12.7261	19.3735	9.36338	26.0186	25.7081	10.8706	7.33197	6.25357	9.74323	5.86958	9.70564	4.32483	6.32071	28.3891	20.6895
hsa-miR-942-3p	MIMAT0026734	1.47404	2.70873	0	1.35481	1.66848	1.19471	0.5294	0.62534	1.59286	0.349008	0.286276	1.05802	0.456568	0	0	0.72902	0	2.03956	1.23736	0	3.46693	0.397782	0.60983	0.843044	0.927519	1.10057	1.42645	0.669664	0	0.60547	1.15889	0	2.16499	1.53591	6.2679	3.34406	2.43925	8.74077	3.80469	0.623997	0.446683	0.270645	0	1.18041	1.44161	1.4046	3.2092	0.481152
hsa-miR-943	MIMAT0004986	0	0	0	0	0.27808	0.597354	0	0	0	0	0	0	0	0	0	0	0	0	0	0	0.577821	0	0	0.421522	0.371008	0	0.142645	0	0	0	0	0	0	0	0	0	0.813082	0	0	0.155999	0	0	0	0.131157	0	0	0	0.240576
hsa-miR-944	MIMAT0004987	476.115	269.248	114.452	208.867	40.8778	53.7619	154.055	70.0381	363.969	1.39603	118.518	49.0215	38.3517	584.419	61.733	344.462	58.5284	380.718	251.183	32.9552	325.313	0.397782	326.259	555.566	3.52457	377.864	581.28	152.014	329.055	154.395	527.295	121.696	272.139	246.623	246.727	2.67525	4.06541	8.74077	5.9788	52.5718	60.7489	247.099	49.5654	59.8077	751.559	138.002	98.2509	128.468
hsa-miR-1178-3p	MIMAT0005823	0	0	0	0	0	0	0	0	0	0	0	0	0	0	0	0	0	0	0	0	0	0	0	0	0	0	0	0	0	0	0	0	0	0	0	0	0	0	0	0	0	0	0	0	0	0	0	0
hsa-miR-1179	MIMAT0005824	0	0.541746	0.593017	0	0	0.597354	0	1.25068	0.79643	0	0	0	0	1.04923	0	0.36451	0	0	0	0	0	0.265188	0	0	0	0	0.285291	0	0	0.302735	0	0	0	0	0	0	0	0	0	0.311999	0.893366	0	0.652176	0	0	0	0.246862	0
hsa-miR-1180-5p	MIMAT0026735	0	0	0	0.451604	0.27808	0	0	0	0	0	0	0	0	0	0	0	0	0	1.23736	0	0	0.132594	0	0.210761	0	0	0	0	0	0	0	0	0	0.219416	0	0	0	0	0.543528	0	0.446683	0.54129	0	0	0	0	0	0.240576
hsa-miR-1180-3p	MIMAT0005825	11.7923	21.6698	9.48827	21.9028	4.72737	17.3233	18.529	5.00272	14.3357	8.02718	70.7101	7.7588	24.6547	48.2644	35.3514	39.7316	28.395	14.9568	97.7511	10.8986	26.5798	59.2696	26.8325	23.1837	37.4717	28.4315	42.0804	8.70563	7.13399	6.35744	51.3774	9.46526	44.3823	49.1491	6.8377	16.0515	8.13082	15.939	20.654	18.7199	22.3342	15.9681	12.3913	37.1175	222.969	15.8018	29.6234	22.8547
hsa-miR-1181	MIMAT0005826	0	0	0	0	0	0.597354	0	0	0	0.349008	0.572552	0	0.228284	0	0	0	0	0	0	0	0	0.397782	0	0	0	0.366858	0.28529	0	0	0	0	0	0.216499	0.219416	0	0.668813	0	0	0	0.467997	0	0	0	0.262315	0	0	0	0.240576
hsa-miR-1182	MIMAT0005827	0	0	0	0	0	0	0	0	0	0	0	0	0	0	0	0	0	0	0	0	0	0	0	0	0	0	0	0	0	0	0	0	0	0	0	0	0	0	0	0	0	0	0	0	0	0	0	0
hsa-miR-1184	MIMAT0005829	0	0	0	0	0	0	0	0	0	0	0	0	0	0	0	0	0	0	0	0	0	0.132594	0	0	0	0	0	0	0	0	0	0	0	0	0	0	0	0	0	0	0	0	0	0	0	0	0	0
hsa-miR-1225-5p	MIMAT0005572	0	0	0	0.451604	0	0	0	0	0	0	0	0	0	0	0	0	0	0	0	0	0	0.265188	0	0.210761	0	0	0	0	0	0	0	0	0	0	0	0	0	0	0	0	0	0.270645	0	0	0	0	0	0
hsa-miR-1225-3p	MIMAT0005573	0	0	0	0	0	0	0	0	0	0	0	0	0	0	0	0	0	0	0	0	0	0	0	0	0	0	0	0.111611	0.445874	0	0	0	0.216499	0	0	0	0	0	0	0	0	0	0	0	0	0	0	0
hsa-miR-1226-5p	MIMAT0005576	0	0	0	0	0	0	0	0	0	0	0	0	0	0	0	0	0	0	0	0	0	0	0	0	0	0	0	0	0	0	0	0	0	0	0	0	0	0	0	0	0	0	0	0.131157	0	0	0	0
hsa-miR-1226-3p	MIMAT0005577	1.47404	0	1.18603	2.48382	1.3904	7.16825	0.5294	0.62534	0.79643	1.04702	1.1451	1.41069	0.684852	5.24613	1.5829	1.45804	5.2154	2.03956	2.47471	1.29745	4.62257	2.65188	0.304915	0.843044	1.85504	0.917145	1.28381	0.334832	2.67524	0.605471	1.93148	0	5.84548	1.31649	0.569809	1.33763	1.62616	0.514163	2.17411	0.623997	1.34005	1.35323	1.30435	2.7543	3.36375	0.7023	0.987448	0.721728
hsa-miR-1227-5p	MIMAT0022941	0	0	0	0	0	0	0	0	0	0	0	0	0	0	0	0	0	0	0	0	0	0	0	0	0	0	0	0	0	0	0	0	0	0	0	0	0	0	0	0	0	0	0	0	0	0	0	0
hsa-miR-1227-3p	MIMAT0005580	0.737021	0	0	0	0	0	0	0	1.59286	0	0	1.41069	0.228284	0	0	0.36451	0.579489	0	0	0	0	0.132594	0	0.210761	0.371008	0.183429	0.142645	0	0.445874	0	0	0	1.08249	0.219416	0	0	0	0	0	0.155999	1.34005	0	0	0.131157	0	0	0	0
hsa-miR-1228-5p	MIMAT0005582	1.47404	1.62524	0	2.48382	3.05888	1.19471	0	0	0	0	0.572552	1.41069	1.3697	0	1.05526	0.36451	1.73847	2.03956	2.47471	1.81643	0	0	0	0.210761	0.371007	0	0	0.669664	0	0.60547	1.15889	0.450727	0.432998	1.53591	0	1.33763	0	0	0	0.467998	0.446683	0	1.95653	0	0	1.05345	0.246862	0.481152
hsa-miR-1228-3p	MIMAT0005583	0.737021	0	0.593017	0.451604	0.55616	2.38942	0	0.62534	0.79643	0	1.71765	1.05802	0.456568	1.04923	0	0.36451	0	2.03956	0	0.25949	2.31128	0.530376	0	0.632283	1.66953	0.917145	0.142645	1.33933	0.891748	1.51368	0.386296	0	0.432998	1.75533	2.27923	0	0	0.514163	0	1.71599	0.446683	0.270645	0	0.131157	1.44161	1.05345	0.246862	0.240576
hsa-miR-1229-5p	MIMAT0022942	0	0	0	0.225802	0	0	0	0	0	0	0	0	0	0	0	0	0	0	0	0	0	0	0	0.210761	0	0	0	0	0	0	0	0.450727	0	0	0	0.668813	0	0	0	0	0	0	0	0	0	0	0	0
hsa-miR-1229-3p	MIMAT0005584	0.737021	0.541746	0	2.03222	1.11232	0	0	0	0	0	0.572552	0.705346	1.14142	2.09845	1.5829	1.82255	0.579489	0.679854	3.71207	1.03796	0	0.265188	0.914745	1.89685	0.927519	1.284	0	0.781275	2.22937	0.302735	0	0	0.216499	0.219416	1.70943	0	0	0	0.543528	0.467998	0	0.54129	0.652176	1.57389	0	0	0	0.721728
hsa-miR-1231	MIMAT0005586	0	0	0	0	0	0	0	0	0	0	0	0	0.228284	0	0	0	0	0	0	0	0	0	0	0	0	0	0	0	0	0	0	0	0	0	0	0	0	0	0	0	0	0	0	0	0	0	0.246862	0
hsa-miR-1234-3p	MIMAT0005589	0	0	0	0	0	0	0	0	0	0.349008	0	0	0	0	0	0	0	0	0	0	0	0	0.304915	0	0	0	0.285291	0	0	0	0.772593	0	0.216499	0	0	0	0	0	0	0.311999	0	0	0	0	0	0	0.246862	0.240576
hsa-miR-1236-5p	MIMAT0022945	0	0	0	0	0	0	0	0	0	0	0	0	0	0	0	0	0	0	0	0	0	0	0	0	0	0.183429	0	0	0	0	0	0	0.216499	0	0	0.668813	0	0	0	0	0	0	0	0.524629	0	0	0	0
hsa-miR-1236-3p	MIMAT0005591	0	0	0	0	0	0	0	0	0	0	0	0	0	0	0	0	0	0.679854	0	0	0	0	0	0	0	0	0	0	0	0	0	0	0	0	0	0	0	0	0	0	0	0	0	0	0	0	0	0
hsa-miR-1237-5p	MIMAT0022946	0	0	0	0	0	0	0	0	0	0	0	0	0	0	0	0	0	0	0	0	0	0	0	0	0	0	0	0	0	0	0	0	0	0	0	0	0	0	0	0	0	0	0	0	0	0	0	0
hsa-miR-1237-3p	MIMAT0005592	0	0	0	0.225802	0	0	0	0	0	0	0	0	0	0	0	0	0	0	0	0	0	0.132594	0	0	0.742015	0.183429	0.142645	0.111611	0.445874	0	0.386296	0	0	0.438832	0	0	0	0	0	0	0	0	0	0.262315	0	0.7023	0	0
hsa-miR-1238-3p	MIMAT0005593	0	0.541746	0	0.225802	0	0	0	0	0	0	0	0	0	0	0	0	0	0	0	0	0	0	0	0	0.185504	0	0	0	0.445874	0	0	0	0	0	0	0	0	0	0	0.155999	0	0	0	0.131157	0	0	0	0
hsa-miR-1203	MIMAT0005866	0	0	0	0	0	0	0	0	0	0	0	0	0	0	0	0	0	0	0	0	0	0	0	0	0	0	0	0	0	0	0	0	0	0	0	0	0	0	0	0	0	0	0	0	0	0	0	0
hsa-miR-1204	MIMAT0005868	0	0	0	0	0	0	0	0	0	0	0	0	0	0	0	0	0	0	0	0	0	0	0	0	0	0	0	0	0	0	0	0	0	0	0	0	0	0	0	0	0	0	0	0	0	0	0	0
hsa-miR-548e-5p	MIMAT0026736	0	0	0	0	0	0.597354	0	0	0	0	0.572552	0	0	0	0	0	0	0	0	0	0	0	0.304915	0.210761	0.185504	0.366858	0.142645	0	0	0	0.386296	0	0	0	0	0	0	0	0.543528	0	0.893366	0	0.652176	0	0	0	0.493724	0
hsa-miR-548e-3p	MIMAT0005874	0.737021	1.08349	1.18603	0.451604	0	1.19471	0.5294	0	0	0.349008	0	0.705346	0.228284	2.09845	0	0.36451	0	0.679854	0	0.51898	1.15564	0.132594	1.21966	0	0.185504	0.550287	0.713226	0.558054	0.445874	0	0.772593	0.901453	0.216499	0.219416	1.13962	0	0.813082	0.514163	1.08706	0.779997	0	0.811935	0	0.262315	0	0.702301	0.740585	0
hsa-miR-548j-5p	MIMAT0005875	0	0	0.593017	0	0	0	0	0	0	0.349008	1.1451	0.352673	0.913136	1.04923	0.527632	0.72902	0	0	0	0	0	0.132594	0.60983	1.26457	0.185504	0.366858	0.713226	0.669664	0.891748	0	0.386296	0.450727	0	0	0.569809	1.33763	0.813082	1.02833	0	0.467998	0.893366	1.35323	0.652176	0.655787	0.480536	0.7023	1.72803	0
hsa-miR-548j-3p	MIMAT0026737	0	0	0	0	0	0	0	0	0	0	0	0	0	0	0	0	0.579489	0	0	0	0	0	0	0	0	0	0	0	0	0	0	0	0	0	0	0	0	0	0	0	0	0	0	0	0	0	0	0
hsa-miR-1285-3p	MIMAT0005876	0.737021	0	0	0.451604	0	0	0	0.62534	0	0	0	0	0	0	0	0	0	0.679854	0	0.51898	0	0	0	0	0	0	0	0	0	0.302735	0	0	0	0	0.569809	0	0	0	0	0	0	0.541291	0	0	0	0	0	0
hsa-miR-1286	MIMAT0005877	0	0	0	0	0	0	0	0	0	0	0.286276	0	0	0	0.527632	0	0	0	0	0	0	0	0	0.210761	0	0	0	0.111611	0.891748	0	0	0	0	0.438831	0	0	0	0	0	0	0	0	0	0.393472	0	0	0	0
hsa-miR-1287-5p	MIMAT0005878	22.8476	34.13	14.8254	16.4836	15.2944	18.518	18.529	13.1321	11.15	35.2498	30.6315	81.4674	25.1112	30.4275	34.8237	21.8706	38.8258	34.6726	16.0856	18.9428	22.535	56.22	18.5998	22.9729	53.054	28.2481	17.5454	7.70114	30.3194	18.7696	12.3615	36.5089	17.7529	29.1823	12.5358	18.0579	30.084	24.1657	25.5458	15.7559	30.3745	10.2845	13.6957	12.3288	24.0268	11.588	64.9246	11.7882
hsa-miR-1287-3p	MIMAT0026738	1.47404	23.2951	9.48827	16.7094	7.78625	11.9471	10.0586	10.6308	4.77858	6.63115	5.15296	32.4459	8.21822	10.4923	8.96975	23.6931	15.6462	28.5539	16.0856	12.9745	17.3346	12.1987	7.62288	2.95065	7.23464	7.88745	2.99555	0.446443	20.0643	7.87112	0.386296	12.6203	0.432998	1.31649	3.41885	6.01931	23.5794	7.19828	11.9576	2.02799	12.0604	5.41291	5.21741	1.04926	1.44161	2.1069	16.046	2.64634
hsa-miR-1289	MIMAT0005879	0	0	0	0	0	0	0	0	0	0	0	0	0	0	0	0	0	0	0	0	0	0.132594	0	0	0	0	0	0	0	0	0	0	0	0	0	0	0	0	0	0	0	0	0	0	0	0	0	0
hsa-miR-1290	MIMAT0005880	0	0	0.593017	0	0	0	0	0	0.79643	0	0	0	0	0	0	0.36451	1.15898	0	0	0	0	0.132594	0	0.210761	0	0	0.285291	0	0	0	0	0	0	0	0	0	0	0	0	0	0	0.541291	0	0	0	0	0	0
hsa-miR-1291	MIMAT0005881	0.737021	0	0.593017	1.12901	1.11232	0.597354	0	0.62534	0.79643	1.39603	0.286276	1.41069	1.3697	1.04923	1.5829	1.45804	0.579489	0	0	0	2.31128	0.66297	1.21966	1.47533	0.371008	0.733716	0.713226	0.669665	0.445874	0.302735	0.386296	0	1.08249	0.219416	7.40751	9.36338	0.813082	2.05665	1.08706	0.155999	0.893366	1.62387	0.652176	0.786943	0	0.35115	0.740586	0
hsa-miR-548k	MIMAT0005882	0.737021	0	0	0.903208	0	0	0	0.62534	0	0.698016	0	0	0	0	0	0	0.579489	0	0	0.25949	0	0.132594	0.304915	0.421522	0.556511	0.550287	0.28529	0	0	0	0	0	0.865996	0.438832	1.13962	0.668813	2.43925	2.57082	0.543528	0	0	0.270645	0	0.524629	1.44161	0	0.246862	0.721728
hsa-miR-1293	MIMAT0005883	2.21106	0.541746	1.77905	0.903208	0.556161	0	6.8822	1.87602	0	1.04702	0.572552	1.05802	0.913136	1.04923	0	2.55157	0	4.07912	3.71207	0	4.04475	0	3.9639	6.32283	8.34766	4.4023	0.285291	5.58054	0	0.302735	0.386296	0.450727	0.432998	0	4.55847	0	0	0	0	0.311998	0	0.270645	0	0	0.480536	7.37416	0	0.721728
hsa-miR-1294	MIMAT0005884	0	0	0.593017	0	0	0	0	0	0	0	0	0	0.228284	0	0.527632	0	0	0	0	0	0	0	0.60983	0.421522	0.371008	0.183429	0.142645	0	0	0	0	0	0.216499	0	0	0	0	0	0	0.311998	0.446683	0	0	0	0	0.7023	0.493724	0
hsa-miR-1295a	MIMAT0005885	0.737021	1.62524	0.593017	2.25802	0.834241	7.16825	0	1.87602	0.79643	0.698016	3.14903	1.05802	2.51112	1.04923	0.527632	1.09353	3.47694	0.679854	0	3.89235	1.15564	11.0053	0.60983	0.843044	0.742015	1.46743	1.5691	0.223222	2.67524	1.51368	0.772592	3.15509	5.62898	0.877662	0	0	2.43925	3.59914	0	2.96399	0.893366	0.270645	3.26088	4.32819	1.44161	1.75575	13.3305	2.88691
hsa-miR-1297	MIMAT0005886	0	0	0	0	0	0	0	0	0	0	0	0	0	0	0	0	0	0	0	0	0	0	0	0	0	0	0	0	0	0	0	0	0	0	0	0	0	0	0	0	0	0	0	0	0	0	0	0
hsa-miR-548l	MIMAT0005889	0.737021	0	0	0.225802	0	0	0	0	0	0	0	0	0	0	0	0	0	0	0	0	0	0	0.304915	0.421522	0	0	0	0	0	0	0	0	0	0	0.569809	0	0	0.514163	0	0	0	0	0	0.393472	0	0	0	0
hsa-miR-1303	MIMAT0005891	0	0	0	0	0	0	0	0	0	0	0	0	0	0	0	0	0	0	0	0	0	0	0	0	0	0	0	0	0	0	0	0	0	0	0	0	0	0	0	0	0	0	0	0	0	0	0	0
hsa-miR-1304-5p	MIMAT0005892	0.737021	0	0	0.903208	0.27808	1.79206	0	0	0	0	0	0	0	0	1.05526	0.729019	0	0	0	0.25949	0	0.530377	1.21966	0.843044	0.927518	0.917145	1.14116	0	0	0	1.54519	0	1.73199	0.219416	0.569809	0	0	0	0	0.155999	0	0	0	1.44273	1.92215	0.35115	0.493724	0.240576
hsa-miR-1304-3p	MIMAT0022720	0	0.541746	0	0	0	0.597354	0	0	0	0	0	0	0	0	0	0	0	0	1.23736	0	0.577821	0	0.60983	0.632283	27.64	42.1887	67.0433	3.23671	0.445874	0	1.15889	0	0.649497	0.438832	0	0	0	0	0	0.155999	0	0	0	0.393472	0	0	0.246862	0
hsa-miR-1305	MIMAT0005893	0	0	0	0.225802	0.27808	1.19471	1.5882	0.62534	0	0.349008	0	0	0	0	0	7.6547	0	2.71942	0	1.29745	0	0	0.304915	0	0	0.550287	0.427936	0.223222	0	0.60547	1.93148	0	0.432998	0	1.13962	0	0	0	0	0.311999	0	3.24774	1.30435	0	0.480536	0	1.48117	0.962304
hsa-miR-1243	MIMAT0005894	0	0	0	0	0	0	0	0	0	0	0.286276	0	0	0	0	0	0	0	0	0	0	0	0	0.210761	0	0	0	0	0	0	0	0	0	0	0	0	0	0	0	0	0	0.270645	0	0	0	0	0	0
hsa-miR-548f-5p	MIMAT0026739	0	0	0	0	0	0	0	0	0	0	0	0	0	0	0	0	0	0	0	0	0	0.132594	0	0	0	0	0	0	0	0	0	0	0	0	0	0	0	0	0	0	0	0	0	0	0	0	0	0
hsa-miR-548f-3p	MIMAT0005895	0.737021	1.08349	0	0	0	2.98677	3.1764	0	11.15	0.349008	0.286276	0	0	2.09845	1.5829	0.729019	0	0	1.23736	1.29745	0	1.85632	0	0.210761	0	0	0.713226	0.111611	0	0	2.31778	0	1.94849	1.09708	0	4.68169	1.62616	0	0	0.155999	0	3.24774	0	0.131157	1.44161	0.35115	0	2.40576
hsa-miR-1245a	MIMAT0005897	0	0	0	0	0	0	0	0	0	0	0.286276	0	0	0	0	0	0.579489	0	0	0.25949	0	0	0	0	0.185504	0	0	0	0	0	0	0	0	0	0	0	0	0	0.543528	0	0	0	0	0.262314	0	0	0.246862	0
hsa-miR-1246	MIMAT0005898	2.21106	3.79222	0	0.451604	0	0.597354	0.5294	0	0	0.349008	0	0	0	0	0.527632	0	1.15898	0	0	0	0	0.265188	0	0.843044	0	0	1.42645	0.558053	0.445874	0	0	0	0.649497	1.31649	0	0	0	3.08498	3.26117	0.311998	0	1.35323	0	0.131157	0	0	0	0.240576
hsa-miR-1247-5p	MIMAT0005899	0.737021	3.25047	5.33715	2.93543	6.39585	22.6995	0.5294	3.75204	1.59286	2.79206	23.7609	1.05802	14.1536	0	4.22106	5.10314	3.47693	4.75898	3.71207	26.7275	9.82296	0.397782	0.304915	1.26457	3.71007	4.95258	2.28233	1.0045	0.891748	3.93556	4.63556	2.70436	0.216499	1.75532	3.41885	0	8.13082	1.54249	0.543528	4.36799	4.91352	1.35323	13.0435	0.786944	1.44161	2.1069	1.97489	5.77383
hsa-miR-1247-3p	MIMAT0022721	33.1659	22.2116	14.2324	9.48369	46.4394	116.484	10.588	53.7793	12.7429	24.7796	29.7727	6.70078	21.9153	10.4923	18.9948	8.74823	11.0103	12.9172	8.66149	44.1133	33.5136	0.132594	1.82949	1.47533	8.53316	10.4555	3.70878	2.00899	7.57986	31.7872	32.8352	18.0291	15.1549	10.0931	64.3884	1.33763	159.364	3.08498	7.60939	29.3279	12.9538	10.2845	162.392	9.31217	19.702	28.092	2.71548	21.8924
hsa-miR-1248	MIMAT0005900	3.68511	2.16698	0	1.58061	1.94656	2.38942	4.2352	1.25068	1.59286	0.698016	0.286276	0.352673	1.3697	1.04923	1.05526	1.45804	1.15898	2.03956	1.23736	2.07592	3.46693	0.397782	1.21966	7.5874	2.59705	0.366858	4.99259	1.89738	0.891748	0	0	0.450727	0.432998	0.219416	5.12828	1.33763	0	2.05665	2.17411	0.311998	0.446683	1.62387	2.6087	0.131157	0	0.35115	0.493724	0
hsa-miR-1249	MIMAT0005901	3.6851	3.25048	2.37207	5.87085	3.05888	2.38942	2.647	1.87602	0.79643	0.698016	4.00786	0.352673	1.59799	2.09845	3.16579	2.55157	2.31796	8.8381	11.1362	2.5949	6.35603	0.928159	5.48847	2.10761	1.48403	9.35488	3.42349	2.34383	0	1.81641	3.47667	0	0.649497	3.07182	0.569809	1.33763	1.62616	1.02833	0	2.02799	0.893366	2.9771	1.95653	0.52463	3.84429	4.91611	4.69037	2.88691
hsa-miR-1250-5p	MIMAT0005902	0	0	0	0	0.27808	0	0	0	1.59286	0	0	0	0	0	0	0	0	0	1.23736	0	0	0	0	0	2.04054	0	0	0.334832	0	0	0	0	0	0.658247	0.569809	0.668813	0	0	0	0	0.446683	0.811936	0	0	0	0	0	0
hsa-miR-1250-3p	MIMAT0026740	0	0	0	0	0	0	0	0	0	0	0	0	0	0	0	0	0	0	0	0	0	0	0	0	0	0	0	0	0	0	0	0	0	0	0	0	0	0	0	0	0	0	0	0	0	0	0	0
hsa-miR-1251-5p	MIMAT0005903	0	0	0	1.80642	1.66848	0.597354	0	0	0	1.39603	0.572552	0.352673	1.14142	0	0	3.28059	0	0	1.23736	0	0.577821	3.04967	0	1.05381	2.78255	0	0	0	2.22937	0.302735	0	0.450727	2.81449	0	0.569809	0	1.62616	0	16.8494	0	1.34005	0.541291	0	0	0	0	0	0.481152
hsa-miR-1251-3p	MIMAT0026741	0	0	0	0	0	0	0	0	0	0	0	0	0	0	0	0	0	0	0	0	0	0.265188	0	0	0	0	0	0	0	0	0	0	0	0	0	0	0	0	1.63058	0	0	0	0	0	0	0	0	0
hsa-miR-1253	MIMAT0005904	0	0	0	0	0	0	0	0	0	0	0	0	0	0	0	0	0	0	0	0	0	0	0	0	0	0	0	0	0	0	0	0	0	0	0	0	0	0	0	0	0	0	0	0	0	0	0	0
hsa-miR-1254	MIMAT0005905	0.737021	1.62524	0	2.25802	0.55616	7.16825	0	0	0.79643	0	1.71766	1.05802	0.228284	0	1.5829	4.37412	2.31796	0.679854	0	0.51898	4.62257	1.45853	0.304915	0.843044	0.371008	0.183429	1.14116	1.0045	3.56699	0	1.54519	0.450727	1.29899	0.219416	2.27924	1.33763	0	4.62747	0.543528	0.623997	0.446683	0.270645	0.652176	2.36083	1.92214	0.7023	0.493723	0.962304
hsa-miR-1255a	MIMAT0005906	0	0	0.593017	0	0	0	0	0	0	0	0	0.352673	0	0	0	0	0	0	0	0	0	0	0	0.210761	0	0.183429	0.28529	0.111611	0	0	0	0	0	0.219416	0	0	0.813082	0	0	0	0.446683	0.270645	0	0	0	0	0	0
hsa-miR-1256	MIMAT0005907	0	0	0	0	0	0	0	0	0	0	0	0	0	0	0	0	0	0	0	0	0.577821	0	0	0	0	0	0.285291	0	0	0	0	0	0	0.219416	0.569809	0	0	0	0	0	0	0	0	0.131157	0	0	0	0.240576
hsa-miR-1257	MIMAT0005908	0	0	0	0	0	0	0	0	0	0	0	0	0	0	0	0	0	0	0	0	0	0.265188	0	0	0	0.183429	0.142645	0	0	0	0.772593	0	0	0	0	0	0	0	0	0	0	0	0	0	0	0	0	0
hsa-miR-1258	MIMAT0005909	0	0	0	0	1.3904	0	0	0.62534	0	0.698016	0.858828	0.705346	0	0	1.05526	0.72902	0	0	0	2.5949	0	0.132594	0.304915	0	0.742014	0	0.28529	0.111611	0.445874	1.21094	0.386296	0	1.73199	1.75533	3.41885	0	0	1.54249	0.543528	2.02799	1.34005	0.54129	0.652176	0.9181	0	0.35115	0.740586	0
hsa-miR-1260a	MIMAT0005911	0	0	0	0	0	0	0	0	0	0	0	0	0	0	0	0	0	0	0	0	0	0	0	0	0	0	0	0	0	0	0	0	0	0	0	0	0	0	0	0	0	0	0	0	0	0	0	0
hsa-miR-1261	MIMAT0005913	0	0	0	0	0	0	0	0	0	0	0	0	0	0	0	0	0	0	0	0	0	0	0	0	0	0	0	0	0	0	0	0	0	0	0	0	0	0	0	0	0	0	0	0	0	0	0	0
hsa-miR-1262	MIMAT0005914	2.94808	0.541746	0.593017	1.80642	1.3904	4.18148	1.5882	0	0	0.698016	0.286276	0.352673	0.456568	1.04923	1.5829	1.45804	1.73847	2.03956	6.18678	0.51898	1.73346	0.397782	0.914745	1.89685	0.556511	1.65086	1.5691	0.669664	0.891748	2.42188	2.31778	1.80291	4.32998	3.07182	7.40751	0.668813	0.813082	2.05665	1.08706	0.623997	1.78673	2.16516	0.652176	0.786944	4.32483	2.1069	0.246862	0
hsa-miR-1263	MIMAT0005915	0	0	0	0	0	0	0	0	0	0	0	0	0	0	0	0	0	0	0	0	0	0	0	0	0	0	0	0	0	0	0	0	0.865996	0	0	0	0	0	0	0	0	0	0	0	0	0	0	0
hsa-miR-548n	MIMAT0005916	0	0	0	0	0.27808	0	0	0	0	0	0	0	0	1.04923	0	0.36451	0	0	0	0	0	0	0	0.210761	0.185504	0	0.142645	0	0	0	0	0	0	0.219416	0	0	0	0	0	0	0	0	0.652176	0	0	0	0	0
hsa-miR-548o-3p	MIMAT0005919	0.737021	0	1.18603	0	1.66848	1.19471	1.0588	0	0.79643	0.349008	0.286276	0	0.228284	0	0	1.09353	1.73847	0	3.71207	0.25949	1.73346	1.72372	0	1.26457	0.556511	0.917145	0.427936	0.446443	1.33762	0.605471	0.386296	0.901453	0.865996	1.09708	1.13962	1.33763	0.813082	1.02833	1.08706	0.623998	1.34005	0.270645	0	0.655787	0	0.702301	0.987447	0.481152
hsa-miR-1266-5p	MIMAT0005920	8.10723	1.62524	4.15112	12.6449	6.95201	5.37619	0.5294	1.87602	0.79643	5.23512	7.72945	9.16949	4.10911	6.29535	10.025	9.11274	20.8616	1.35971	28.4592	7.5252	12.7121	11.6683	3.9639	4.42598	19.6634	1.83429	2.99555	1.78577	2.67524	4.54103	22.0189	9.91598	41.1348	38.8366	5.69809	11.3698	13.8224	54.5013	18.4799	7.79997	3.12678	11.0965	0	49.5775	37.9624	0	23.205	3.84922
hsa-miR-1266-3p	MIMAT0026742	0	0	0	0	0	0.597354	0	0	0.79643	0	0	0	0	0	0.527632	0	0	0	0	0.25949	0.577821	0	0	0	0.371008	0	0	0	0	0	0	0	0	0.219416	0	0	0	0	0	0.155999	0	0.270645	0	0	0	0	0.493723	0
hsa-miR-1267	MIMAT0005921	0	0	0	0	0	0	0	0	0	0	0	0	0	0	0	0	0	0	0	0	0	0	0	0	0	0	0	0	0	0	0	0	0	0	0	0	0	0	0	0	0	0	0	0	0	0	0	0
hsa-miR-1269a	MIMAT0005923	92.8646	237.826	559.215	1070.98	313.675	298.08	91.0568	450.87	230.965	225.808	643.834	652.797	869.305	129.055	69.6474	763.648	4594.19	1071.45	6.18678	391.311	576.666	2852.9	304	659.682	17.8083	10.0886	7.13227	179.916	4322.3	231.895	86.5304	178.037	3109.36	461.212	49.5734	81.5951	7.31773	1362.53	9.23997	0.623998	685.212	1.35323	200.87	1628.45	1.92214	2.45805	2125.73	518.923
hsa-miR-1270	MIMAT0005924	0.737021	0.541746	1.77905	0.225802	1.3904	0	0.5294	0	1.59286	0.698016	0.572552	1.76336	1.14142	1.04923	0.527632	1.09353	20.2821	0.679854	1.23736	1.29745	0.577821	0.397782	0.304915	0.210761	0.185504	1.65086	1.14116	1.67416	0.891748	0.908206	0	0.901454	0	0	0	0.668813	8.13082	0.514163	0	0.467997	4.02015	0.811936	0.652176	0.262314	10.0913	0.35115	17.0335	1.92461
hsa-miR-1272	MIMAT0005925	0	0	0	0	0	0	0	0	0	0	0	0	0	0	0	0	0	0	0	0	0	0	0	0	0	0	0	0	0	0	0	0	0	0	0	0	0	0	0	0	0	0	0	0	0	0	0	0
hsa-miR-548h-5p	MIMAT0005928	0	0	0	0	0	0	0	0	0	0	0	0	0	0	0	0	0	0	0	0	0	0	0	0	0	0	0	0	0	0	0	0	0	0	0	0	0	0	0	0	0	0	0	0	0	0	0	0
hsa-miR-1275	MIMAT0005929	0	0	0	0.225802	0	0	0	1.25068	0	0.698016	0.286276	0.352673	0.684852	0	0.527632	0.36451	1.73847	0	0	0.25949	0	3.18226	0	0	0	0.366858	0.142645	0	0	0.302735	0.386296	0	0.216499	0	0.569809	0	0	0	0	0.467998	0	0	0	0.131157	1.92214	0	4.93723	0
hsa-miR-1276	MIMAT0005930	0	0.541746	0	0.451604	0	0	0	0.62534	0.79643	0	0.286276	0.352673	0.228284	0	0	0	0	0	1.23736	0.25949	0	1.06075	0.914745	0.210761	0.371008	0	0.427936	0	0	0	0	0.450727	0.649497	1.09708	0.569809	0	0	0.514163	1.63058	0.311998	0	0.54129	0	0.262314	2.88322	0	0.493724	0.240576
hsa-miR-1277-3p	MIMAT0005933	18.4255	3.25048	1.18603	2.25802	2.22464	4.18148	3.7058	5.62806	3.98215	3.83909	0.286276	2.82138	1.14142	2.09845	1.5829	9.47725	3.47693	2.71942	6.18678	2.33541	1.73346	1.45854	1.21966	2.10761	3.15356	2.56801	1.42645	1.11611	3.56699	3.93556	0.772593	2.25363	0.865996	1.53591	5.69809	2.67525	0.813082	0	11.9576	0.311998	3.12678	5.68355	3.26088	0.393472	0	1.05345	0.987447	0.962305
hsa-miR-1278	MIMAT0005936	0	0	0	0	0.55616	0	0	0	0	0	0	0	0	0	0	0	0	0	0	0	0	0	0	0	0	0.183429	0	0	0	0	0	0	0	0	0	0	0	0	0	0	0	0.811936	0	0	0	0	0	0
hsa-miR-1281	MIMAT0005939	0	0	0	0	0	0	0	0	0	0	0	0	0	0	0	0	0	0	0	0	0	0	0	0	0	0	0	0	0	0	0	0	0	0	0	0	0	0	0	0	0	0	0	0	0	0	0	0
hsa-miR-1284	MIMAT0005941	0.737021	0	0.593017	0.225802	0	1.79206	0	0.62534	0.79643	0	0	1.05802	0.684852	2.09845	0.527632	0.36451	0	0	0	0.51898	0	0.530376	0	1.05381	0.371007	0.183429	0	0.334833	0.445874	0	0	0	0.216499	0.658247	1.13962	0	4.87849	0	0	0.311998	0	0	0	0.131157	0	0.35115	0.740586	0.481152
hsa-miR-1288-5p	MIMAT0026743	1.47404	0	0	0.225802	0.27808	0	0	0	0	0	0	0	0	2.09845	0.527632	0	0	0	0	0.25949	0	0	0	0	0	0.183429	0	0.111611	0.445874	0	0	0	0.865996	0.219416	0.569809	0	2.43925	0	0	0	0.446683	0	0.652176	0.262315	1.44161	0	0.246862	0
hsa-miR-1288-3p	MIMAT0005942	0.737021	0.541746	0	0.903209	0	0	0.5294	0	0.79643	0.698016	0.858827	1.05802	0	0	1.5829	1.09353	0	0	0	0.25949	0.577821	0.662971	0	0.843044	0.185504	0	0.713226	0.334832	0.891748	0	0.772593	0.901453	1.94849	0.219416	0	0	0	0	0.543528	0.623998	0.446683	0.811936	0	0.131157	3.36375	1.75575	0.740585	0.240576
hsa-miR-1292-5p	MIMAT0005943	0	0.541746	0.593017	1.58061	0.834241	1.19471	0	0	0	0.349008	1.1451	0.705346	0.228284	1.04923	0	1.82255	2.89744	0.679854	2.47471	0	0.577821	0.265188	0.60983	0.632283	0.742016	0.733716	0	0.334833	1.7835	0	1.54518	0.450727	0.216499	0.219416	1.13962	1.33763	1.62616	0	0.543528	0.311998	0.893366	0.811935	0.652176	0.655786	1.44161	0.35115	0	0.962304
hsa-miR-1292-3p	MIMAT0022948	0	0	0	0.225802	0	0.597354	0	0.62534	0	0	0	0	0.228284	0	0.527632	0	0	0	2.47471	0	0	0	0	0.421522	0	0	0.142645	0	0	0	0	0	0	0.219416	0.569809	0	0	0	0	0	0.446683	0	0.652176	0.131157	0	0	0.246862	0.240576
hsa-miR-1252-5p	MIMAT0005944	0	0	0	0	0	0	0	0	0.79643	0	0	0	0	0	0	0	0	0	0	0	0	0	0	0	0	0	0	0.111611	0	0	0	0	0	0	0	0	0	0	0.543528	0	0	0.270645	0	0	0	0	0	0
hsa-miR-1252-3p	MIMAT0026744	0	0	0	0	0	0	0	0	0	0.349008	0	0	0	0	0	0	0	0	0	0	0	0	0	0.210761	0	0	0	0	0	0.302735	0	0	0.432998	0	0	0	0	0	0	0	0	0.270645	0	0	0	0	0.493724	0
hsa-miR-664a-5p	MIMAT0005948	5.89617	3.25048	3.5581	3.38703	4.17121	2.38942	3.7058	8.12942	2.38929	1.39603	1.71766	4.23207	3.19598	0	5.27632	4.73863	0.579489	3.39927	3.71207	3.37337	3.46693	1.19335	0.914745	1.26457	1.48403	2.01772	0.855872	2.00899	11.5927	3.93556	4.63555	0.450727	1.51549	1.97474	3.41885	4.01288	1.62616	7.19828	5.43528	3.27599	1.34005	3.51839	1.95653	3.6724	2.40268	2.45805	2.71548	2.88691
hsa-miR-664a-3p	MIMAT0005949	14.0034	10.8349	18.9765	17.3868	27.53	23.2968	7.941	26.2643	8.76073	16.0544	37.7884	27.8611	25.1112	14.6892	26.3816	27.7027	20.2821	36.0323	42.0701	25.949	35.2471	16.3091	26.5276	22.3407	17.2518	14.124	13.8366	13.3933	42.8039	19.0723	26.6544	7.66235	11.9074	28.524	11.966	14.7139	10.5701	11.3116	13.5882	29.1719	8.93366	14.0736	7.82611	11.4107	35.5597	23.1759	29.3765	13.9534
hsa-miR-1306-5p	MIMAT0022726	7.37021	3.25048	8.30223	18.9674	5.83969	19.1153	3.1764	8.12942	7.16787	7.67817	13.455	3.17405	9.81621	22.0337	13.7184	49.2088	11.0103	17.6762	82.9028	11.1581	26.002	8.22084	8.84254	16.0178	17.9938	14.124	7.98814	4.01799	14.7138	4.23829	40.9474	2.70436	20.3509	21.9416	6.2679	6.68813	4.06541	8.74077	5.9788	9.35997	7.14693	10.2845	11.7392	24.6576	21.1436	3.86266	16.2929	9.14189
hsa-miR-1306-3p	MIMAT0005950	1.47404	2.70873	2.96509	3.61283	0.83424	1.79206	2.647	0.62534	0.79643	0.698016	2.57648	2.11604	1.3697	15.7384	3.69342	9.47725	1.15898	0.679854	6.18678	1.29745	2.88911	3.31486	0.304915	3.58294	2.96806	3.48515	3.56613	1.0045	4.01287	0.302735	3.09037	1.80291	5.19598	1.97474	2.84904	1.33763	1.62616	1.54249	1.63058	0.935996	2.23342	2.43581	1.95653	7.21365	8.64965	0.35115	3.94979	1.92461
hsa-miR-1307-5p	MIMAT0022727	1510.16	769.279	719.329	1076.17	512.224	1233.54	649.044	274.524	421.312	612.16	123.671	591.785	121.219	1062.87	1005.14	1626.81	971.224	1057.17	1494.73	1537.22	1613.85	746.903	453.104	1105.44	1060.34	529.376	409.677	251.905	733.909	224.932	210.145	530.505	108.899	77.2343	1181.78	798.562	540.699	139.338	410.363	93.1317	574.881	1291.25	852.394	119.091	41.3261	50.5657	306.108	485.002
hsa-miR-1307-3p	MIMAT0005951	410.521	739.483	853.351	2203.83	801.15	1982.02	753.336	562.181	2222.84	706.741	1760.6	517.724	957.195	1462.62	1567.07	2378.06	2075.15	1885.24	2652.89	2885.53	2373.11	1430.69	2482.62	1309.88	2055.01	1178.71	886.968	1075.59	1434.38	271.554	1391.83	569.718	664.436	832.463	588.043	296.284	809.829	765.589	1009.33	537.262	562.821	374.573	228.262	1172.02	1642.47	1088.57	2338.27	1742.25
hsa-miR-513b-5p	MIMAT0005788	0	0	0	0	0	0	0	0	0	0	0	0	0	0	0	1.09353	0	4.07912	0	0	0	0	0.304915	6.95511	0	0.183429	0	0.111611	0	0	0	0	0	0	0	0	0	0	0.543528	0.779997	0.446683	0	0	0	0	0	0	0.240576
hsa-miR-513b-3p	MIMAT0026749	0	0	0	0	0	0	0	0	0	0	0	0	0	0	0	0	0	0	0	0	0	0	0	0.210761	0	0	0	0	0.891748	0	0	0	0	0	0	0	0	0	0	0	0	0	0	0	0	0	0	0
hsa-miR-513c-5p	MIMAT0005789	0	0.541746	0	0.225802	0	0	0	0	0	0	0.572552	0	1.14142	0	0	5.10314	0	46.9099	2.47471	0.51898	0.577821	0.132594	0	44.049	0	0.183429	0	0.446443	0	0	0	0	0	0.219416	0	0	0	0	0	3.27599	0	0.270645	0.652176	0	0	0	0	0.481152
hsa-miR-513c-3p	MIMAT0022728	0	0	0	0	0	0	0	0	0	0	0	0	0	0	0	0.729019	0	0	1.23736	0.25949	0	0	0	1.26457	0	0	0	0	0	0	0	0	0	0	0	0	0	0	0	0	0	0.541291	0	0	0	0	0	0
hsa-miR-1322	MIMAT0005953	0	0	0	0	0	0	0	0	0	0.349008	0	0	0	0	0	0	0	0	0	0	0	0	0	0	0	0	0	0	0	0	0	0	0	0	0	0	0	0	0	0.155999	0	0	0	0	0	0	0	0
hsa-miR-1197	MIMAT0005955	0	0	0	1.58062	0	0	0	0	0	0	0	0	0	0	0	0	1.15898	0	0	0	0	0	0	0	0.371007	0	0	0	0	0	0	0	1.51549	0	1.70943	0	0	0	0	0	0	0	0	0	0	0.35115	0	0
hsa-miR-1469	MIMAT0007347	0	0	0	0	0	0	0	0	0	0	0	0	0	0	0	0	0	0	0	0	0	0	0	0	0	0	0	0	0	0	0	0	0	0	0	0	0	0	0	0	0	0	0	0	0	0	0	0
hsa-miR-1471	MIMAT0007349	0	0	0	0	0	0	0	0	0	0	0	0	0	0	0	0	0	0	0	0	0	0	0	0	0	0	0	0	0	0	0	0	0	0	0	0	0	0	0	0	0	0	0	0	0	0	0	0
hsa-miR-1537-5p	MIMAT0026765	0.737021	0	1.77905	1.12901	0.834241	1.19471	2.1176	0.62534	0	0.349008	0.286276	0.352673	0	0	1.05526	0.36451	0	0	0	0.25949	1.15564	0	0.60983	0.421522	0.742014	0.183429	0	0.111611	0	0	0	0.901454	0.216499	0	0	4.01288	2.43925	0	0	0	0.446683	0.270645	0	0	0	0.702301	0.493723	0
hsa-miR-1537-3p	MIMAT0007399	0	0	0.593017	0.225802	0	0.597354	0	0	0.79643	0.349008	0	0.705346	0	0	0	0	0	0	0	0	0	0.132594	0	0.210761	0	0.366858	0	0.111611	0	0	0	0	0	0	0	0.668813	0	0	0.543528	0	0	0	0.652176	0	0	0	0.493724	0
hsa-miR-1538	MIMAT0007400	0	0	0	0.903208	0.27808	0.597354	0.5294	0.62534	0	0.349008	0.858828	0.352673	0.456568	0	0.527632	0.72902	0	0	0	0.51898	0.577821	0.66297	0	0.210761	0.185504	0.550287	0.855871	0.223222	0.891748	0	0	0.450727	0	0.658247	0.569809	0	0	0	0.543528	0	0	0.54129	0	0.786944	0.961073	0.35115	0.740585	0.240576
hsa-miR-1539	MIMAT0007401	0	0	0	0.225802	0	0	0	0	0	0	0	0	0	0	0	0	0	0	0	0	0	0	0	0	0	0	0	0	0	0	0	0	0	0	0	0	0	0	0	0	0	0	0	0	0	0	0	0
hsa-miR-320d	MIMAT0006764	5.15914	2.16698	0	0.677406	1.3904	0.597354	0	0.62534	0	0	0.858828	3.17406	1.14142	1.04923	2.11053	0.729019	0	0.679854	0	1.55694	0.577821	0.928159	0.304915	0.632283	0.742015	1.10057	0.713226	0.223222	0.891748	0.60547	7.72593	0.901454	0.865996	1.97474	0.569809	0.668813	1.62616	6.16995	2.17411	1.71599	1.78673	1.35323	3.26088	3.6724	0	2.45805	0.246862	0
hsa-miR-1825	MIMAT0006765	0	0	0	0	0	0	0	0	0	0	0	0	0	0	0	0	0	0	0	0	0	0	0	0	0	0	0.142645	0	0	0	0	0	0	0	0	0	0	0	0	0	0	0	0	0	0	0	0	0
hsa-miR-1827	MIMAT0006767	0	0	0	0	0	0	0	0	0	0	0	0	0	0	0	0	0	0	0	0	0	0	0	0	0	0	0	0	0	0	0	0	0	0	0	0	0	0	0	0	0	0	0	0	0	0	0	0
hsa-miR-1908-5p	MIMAT0007881	0	0	0	0	0	0	0	0	0	0	0	0	0.228284	0	0	0	0.579489	0	0	0.25949	0	0	0	0	0	0	0	0	0	0	0	0	0.432998	0	0	0	0	0	0	0	0	0	0	0	0	0	0	0
hsa-miR-1908-3p	MIMAT0026916	0	0	0	0	0	0	0	0	0	0	0.858827	0	0	0	0	0.36451	0	0	2.47471	0.778469	0.577821	0.132594	0	0.210761	0.371008	0.183429	0.142645	0.223222	0	0	0	0	0	0	0	0	0	0.514163	0.543528	0	0	0	0	0.393472	0	0	0.493724	0.240576
hsa-miR-1909-5p	MIMAT0007882	0	0	0	0	0	0	0	0	0	0	0	0	0	0	0	0	0	0	0	0	0	0	0	0	0	0	0.142645	0	0	0	0	0	0	0	0	0	0	0	0	0	0	0	0	0	0	0	0	0.481152
hsa-miR-1909-3p	MIMAT0007883	0	0	0	0	0	0	0	0	0	0	0	0	0	0	0	0.729019	0	0	0	0	0	0	0	0	0	0	0	0	0	0	0	0	0	0	0	0	0	0	0	0	0	0	0	0	0	0	0	0
hsa-miR-1910-5p	MIMAT0007884	1.47404	0.541746	0	1.12901	0.27808	0.597354	1.5882	0	2.38929	0	3.43531	1.76336	1.82627	5.24613	0	0.729019	0	0	3.71207	0	1.15564	0.132594	3.65898	1.89685	1.85504	2.20115	0.142645	0	0.445874	0.302735	2.31778	0	0.865996	1.09708	1.13962	0	0	0.514163	0	2.49599	0	0.54129	0	0.131157	10.0913	3.86265	0	0.721728
hsa-miR-1910-3p	MIMAT0026917	0	0	0	0.451604	0	0	0	0	0	0.349008	0	0.352673	0	0	0	0	0	0	0	0	0	0	0.60983	0.210761	0	0.183429	0	0	0	0.605471	0	0	0.432998	0.438831	0.569809	0	0	0.514163	0	0.155999	0	0.811936	0	0.262314	0	0.35115	0	0
hsa-miR-1911-5p	MIMAT0007885	0	0	0	3.38703	0	0	0	5.62806	11.9465	0	3.14903	0	0	43.0182	0.527632	191.732	9.85131	2.03956	1.23736	0	12.7121	0	1.52458	0.632283	1.48403	0	13.4087	15.4023	0	0.908206	33.2215	0	25.1139	1.75533	7.97732	0	0	0	0	0.779997	0	33.8307	5.21741	0.655786	0.961073	0	0.246862	21.6519
hsa-miR-1911-3p	MIMAT0007886	0	0	0	0	0	0	0	0.62534	0	0	0	0	0	0	0	1.82255	0	0	0	0	0	0	0	0	0	0	0.142645	0	0	0	0	0	0.432998	0	0	0	0	0	0	0	0	0.811936	0	0	0	0	0	0.240576
hsa-miR-1912	MIMAT0007887	0.737021	0	0	0	0	0	0	0	0	0	0	0	0	0	0	0.36451	0	0	0	0	0	0	0	0	0	0	24.3923	0	0	0	1.93148	0	0.216499	0	0	0	0	0	0	0.311999	0	0	0	0	0	0	0	0
hsa-miR-1913	MIMAT0007888	0	0	0	0	0	0	0	0	0	0	0	0	0	0	0	0	0	0	0	0	0	0.397782	0	0	0.185504	0	0	0	0	0	0	0	0	0	0	0	0	0	0	0	0	0.270645	0	0	0	0	0	0
hsa-miR-1914-5p	MIMAT0007889	0	0	0	0.225802	0	0	0	0	0.79643	0	0	0	0	0	0	0	1.73847	1.35971	0	0	0	0.132594	0	0	0.556511	0.550287	0.142645	0	0	0	0.772592	0	0.216499	0	0	0	0	0	0.543528	0	0	0	0	0.131157	0.480536	0	0.740585	0
hsa-miR-1914-3p	MIMAT0007890	0	0	0	0	0	0	0	0	0	0	0	0	0	0	0	0	0	0	0	0	0	0.265188	0	0	0	0	0	0	0	0	0	0	0	0	0	0	0	0	0	0	0	0	0	0	0	0	0	0
hsa-miR-1915-5p	MIMAT0007891	0	0	0	0	0	0	0	0	0	0	0	0.352673	0.228284	0	0	0	0.579489	0.679854	0	0	0	0	0	0	0.185504	0	0	0	0	0	0	0	2.16499	0	0	0	0	0	0	0	0	0	0	0.786945	0	0	0.246862	0
hsa-miR-1915-3p	MIMAT0007892	0	0	0	0	0	0	0	0	0	0	0	0	0	0	0	0	0.579489	0	0	0	0	0.132594	0	0	0	0	0	0	0	0	0	0	0.649497	0.219416	0	0	0	0	0	0	0	0	0	0.262314	0	0	0.493723	0
hsa-miR-1976	MIMAT0009451	0.737021	7.58444	26.0927	15.8062	16.4067	10.155	5.294	9.38011	4.77858	8.7252	19.1805	6.34811	24.6547	10.4923	18.9948	13.8514	12.1693	8.8381	24.7471	14.5314	11.5564	8.08825	8.84254	11.3811	9.64618	9.17145	5.56317	14.621	5.79636	8.17385	8.11222	9.46526	10.1755	11.629	2.84904	6.01931	7.31774	7.71244	3.26117	13.7279	4.91352	2.70645	2.6087	4.98398	11.5329	14.046	11.1088	10.3448
hsa-miR-2110	MIMAT0010133	5.15914	0	0.593017	1.80642	0.83424	0.597354	1.5882	0	0.79643	0.349008	1.1451	1.76337	1.59799	2.09845	0.527632	1.09353	0	0.679854	0	1.81643	0.577821	0.530376	1.82949	0.843044	1.29853	0.917145	0.427936	0.781275	0.891748	0.908206	1.54518	0.901453	1.73199	2.63299	3.41885	6.68813	1.62616	1.02833	1.63058	1.87199	0.893366	2.43581	2.6087	1.18042	3.84429	0.35115	1.9749	0.721728
hsa-miR-2114-5p	MIMAT0011156	0	0	0	0.451604	0.27808	0	0	0	0	0	0.572552	0	0	0	0.527632	0.36451	1.15898	0.679854	0	0	1.73346	0.132594	1.21966	0	0	1.10057	0.142645	0	0	0.60547	0	0	0	0	0.569809	0	0	4.1133	1.63058	0	0.446683	0.541291	0	0	0	0	0	0
hsa-miR-2114-3p	MIMAT0011157	0	0	0.593017	0	0	0	0	0	0	1.04702	0	0	0	0	0	0	0.579489	0.679854	0	0	1.15564	0	0	0	0	0.183429	0	0.223221	0	0.302735	0	0	0	0	1.13962	0	0	8.22661	2.17411	0	0	0	0	0	0	0.702301	0	0.240576
hsa-miR-2115-5p	MIMAT0011158	0	0	0	0	0	0.597354	0	0	0.79643	0	0.286276	0	0	0	0	0	0	0	1.23736	0	0.577821	0	0	0	0.742014	0	0	0	0	0	1.15889	0	0.216499	0.219416	0	0	0	0	0	0	0	0	0.652176	0	0	0	0	0.481152
hsa-miR-2115-3p	MIMAT0011159	0	0	0	0.451604	0.27808	0	0	0.62534	0	0	0.572552	0.705345	0.456568	0	0	0	0	0	0	0	0	0.132594	0.304915	0.210761	0.742014	0	0	0.558053	0	0	4.24926	0	0	0	1.13962	1.33763	0	0	0	0.311998	0	0.541291	0	0.131157	0.480536	0.702301	0.246862	0.240576
hsa-miR-2116-5p	MIMAT0011160	0	0	0.593017	0.677406	0.27808	0.597354	0	0	0.79643	0	0.286276	0.352673	0	0	0	0	0.579489	0.679854	2.47471	0	0	0.132594	0	0.421522	0.185504	0	0.142645	0.111611	0	0	0	0.901454	0	0	1.13962	0.668813	0	0.514163	0	0	0	0.811936	0.652176	0.393472	0.961073	0.35115	0.246862	0
hsa-miR-2116-3p	MIMAT0011161	0	1.62524	0.593017	0.225802	0	1.79206	0.5294	0	0.79643	0.698016	1.43138	0.352673	0.913136	0	1.05526	0	0	1.35971	0	1.29745	1.15564	0.66297	0.60983	0.632283	1.85504	0.550287	0.998517	0.111611	0.445874	0.908205	1.15889	0.450727	0.432998	0.438831	0.569809	0.668813	0.813082	2.57082	0.543528	0.623998	0.446683	0.541291	0	1.57389	0.961072	0	2.22175	0.481152
hsa-miR-2117	MIMAT0011162	0	0	0	0	0	0	0	0	0	0	0	0	0	0	0	0	0	0.679854	0	0	0	0	0	0	0	0	0	0	0	0	0	0	0	0	0	0	0	0	0	0	0	0	0	0	0.480536	0	0	0
hsa-miR-548q	MIMAT0011163	0	0.541746	0	0.225802	0.27808	0	0.5294	0	0	0	0	0	0.228284	0	1.5829	1.09353	0	0.679854	1.23736	0	0	0	0.304915	0	0.556511	0	0.142645	0.111611	0	0.302735	0.386296	0.450727	0	0.219416	1.13962	0	0	0.514163	0	0	0	0.811936	0	0.393472	0	1.05345	0	0
hsa-miR-2276-5p	MIMAT0026921	0	0	0	0	0	0	0	0	0	0	0.286276	0	0	0	0	0	0	0	0	0	0	0	0	0	0.371008	0	0	0	0.445874	0	0.386296	0	0	0	0.569809	0	0	0	0	0	0	0	0	0.131157	0	0	0	0
hsa-miR-2276-3p	MIMAT0011775	1.47404	0	0	0	0	0	0	0	0	0.349008	0.286276	0	0	0	0	0	0	0	0	0	0	0.132594	0.304915	0	0.556512	0.183429	0.142645	0	0	0	0	0	0.216499	0	0	0	0	0	1.08706	0	0	0	0	0.131157	0	0	0	0
hsa-miR-2277-5p	MIMAT0017352	2.21106	0.541746	0.593017	4.51604	2.22464	1.19471	2.647	0.62534	2.38929	1.04702	3.72159	0.705346	1.14142	1.04923	0.527632	5.10314	2.31796	2.71942	21.035	1.55694	5.77821	1.85632	1.82949	1.05381	0.927518	1.65086	1.5691	0.334832	2.67524	0.60547	1.54519	1.80291	1.08249	0.658248	1.70943	2.00644	0.813082	3.08498	0.543528	0.155999	0.893366	1.35323	3.26088	0.524629	0	0	0.987447	0
hsa-miR-2277-3p	MIMAT0011777	0.737021	0.541746	0	2.25802	1.11232	1.79206	0.5294	0	0	1.39603	1.43138	0	0.684852	2.09845	0	2.18706	1.15898	0.679854	2.47471	0	1.73346	0.530376	0.60983	1.26457	0.371008	0.183429	0.998516	0	0.445874	0.302735	0	0.450727	1.51549	0.658247	0	0	0	2.05665	0	0.155999	0	1.62387	0	0.262315	0	0	0	0.721728
hsa-miR-2278	MIMAT0011778	0	0	0	0	0	0.597354	0	0	0	0	0	0	0	0	0	0.729019	0.579489	0	0	0	0	0	0	0.421522	0	0	0.142645	0.111611	0	0	0	0.450727	0.432998	0	0	0	0	0	0	0	0	0.270645	0	0.131157	0	0	0	0
hsa-miR-2681-5p	MIMAT0013515	0	0	0	0	0	0	0	0	0	0	0	0	0	0	0.527632	0.36451	0	0	0	0	0	0.132594	0	0.210761	0	0.366858	0	0	0	0	0	0	0	0	0	0	0	0	0	0	0	0	0	0	0	0	0	0
hsa-miR-2681-3p	MIMAT0013516	0	0	0	0	0	0	0	0	0	0	0.286276	0	0	0	0	0	0	0	0	0	0.577821	0	0.304915	0.632283	0	0.183429	0.142645	0	0	0	0	0	0	0	0	0	0	0	0	0	0	0	0	0	0	0	0	0
hsa-miR-2682-5p	MIMAT0013517	0	0	0	0	0	0	0	0	0	0	0	0	0	0	0	0	0	0	0	0	0	0	0	0	0	0	0	0.111611	0	0	0.386296	0	0.432998	0.219416	1.13962	6.01931	0	0	0	0	0	0	0.652176	0	0	0	0	0
hsa-miR-2682-3p	MIMAT0013518	0	0	0	0	0	0	0	0	0	0	0	0	0	0	0	0	0	0	0	0	0	0	0	0	0	0	0	0	0	0	0	0	0	0	0	3.34406	0	0	0	0	0	0	0	0	0	0	0	0
hsa-miR-711	MIMAT0012734	0	0	0	0	0	0	0	0	0	0	0	0	0	0	0	0	0	0	0	0	0	0	0	0	0	0	0	0	0	0	0	0	0	0	0	0	0	0	0	0	0	0	0	0	0	0	0	0
hsa-miR-718	MIMAT0012735	0	0	0	0	0	0	0	0	0	0	0	0	0	0	0	0	0	0	0	0	0	0	0	0	0	0	0	0	0	0	0	0	0	0	0	0	0	0	0	0	0	0	0	0	0.480536	0	0	0
hsa-miR-2861	MIMAT0013802	0	0	0	0	0	0	0	0	0	0	0	0	0	0	0	0	0	0	0	0	0	0	0	0	0	0	0	0	0	0	0	0	0	0	0	0	0	0	0	0	0	0	0	0	0	0	0	0
hsa-miR-3115	MIMAT0014977	0	0	0	0	0	0	0.5294	0	0	0	0.286276	0	0	0	0	0	0	0	0	0	0	0.132594	0	0.210761	0	0	0	0	0	0	0	0	0.649497	0	0.569809	0.668813	0.813082	0	0	0.155999	0	0	0	0.524629	0.480536	0	0.493724	0
hsa-miR-3116	MIMAT0014978	0	0	0	0	0	0	0	0	0	0.349008	0	0	0	0	0	0	0	0	0	0	0	0.397782	0	0.210761	0	0.183429	0	0	0	0.302735	0	0	0	0	0	0	0	0	0	0	0	0	0	0	0	0	0	0
hsa-miR-3117-5p	MIMAT0019197	0	0	0	0	0	0	0	0	0.79643	0	0	0	0	0	0	0	0	0	0	0	0	0	0	0	0	0	0	0	0	0	0	0.450727	0	0	0	0	0	0	0	0	0	0	0	0	0	0	0	0
hsa-miR-3117-3p	MIMAT0014979	0.737021	0.541746	2.37207	0.677406	0.55616	0	0.5294	0	0	0	0	0.705346	2.05456	0	0	0	1.15898	2.03956	0	0.25949	0	0	0.914745	0.843044	0.371008	1.65086	2.13968	0	0	0.605471	0.386296	0.450727	1.51549	0.219416	1.70943	0	0.813082	0.514163	2.17411	0.311998	0	0	0.652176	0.131157	0.480536	0.35115	0.740585	0.481152
hsa-miR-3119	MIMAT0014981	0	0	0	0	0	0	0	0	0	0	0	0	0	0	0	0	0	0	0	0	0	0	0	0	0	0	0	0	0	0	0	0	0	0	0	0	0	0.514163	0	0	0	0	0	0	0	0	0	0
hsa-miR-3120-5p	MIMAT0019198	0	0	0	0	0	0	0	0	0	0	0	0	0	0	0	0	0	0	0	0	0	0	0	0	0	0	0	0	0	0	0	0	0	0	0	0	0	0	0	0	0	0	0	0	0	0	0	0
hsa-miR-3120-3p	MIMAT0014982	0	0	0	0	0	0	0	0	0	0	0	0	0	0	0	0	0	0	0	0	0	0	0	0	0.185504	0	0	0	0	0	0	0	0	0	0	0	0	0	0	0	0	0	0	0	0	0	0	0
hsa-miR-3121-5p	MIMAT0019199	0	0	0	0	0	0	0.5294	0	0	0	0	0	0	0	0	0	0	0	0	0	0	0	0	0	0	0	0	0	0	0	0	0	0	0	0	0	0	0	0	0	0	0	0	0	0	0	0	0
hsa-miR-3121-3p	MIMAT0014983	0	0	0	0	0	0	0	0	0	0	0	0	0	0	0	0	0	0	0	0	0	0	0	0	0	0	0	0	0	0	0	0	0	0	0	0	0	0	0	0	0	0	0	0	0	0	0	0
hsa-miR-3122	MIMAT0014984	0	0	0	0	0	0	0	0	0	0	0	0	0	0	0	0	0	0	0	0	0	0	0	0	0	0	0.142645	0	0	0	0	0	0	0	0	0	0	0	0	0	0	0	0	0	0	0	0	0
hsa-miR-3124-5p	MIMAT0014986	0	0	0	0.225802	0	0	0	0	0	0	0	0	0	0	0	0	0	0	0	0	0	0	0	0	0	0	0	0	0	0	0	0	0	0	0	0	0	0	0	0	0	0	0	0	0	0	0	0
hsa-miR-3124-3p	MIMAT0019200	0	0	0	0	0	0	0	0	0	0	0	0	0	0	0	0.36451	0	0	0	0	0	0	0	0	0	0	0.142645	0	0	0	0.386296	0	0	0.219416	0	0	0	0	0	0	0	0	0	0.131157	0	0	0	0
hsa-miR-548s	MIMAT0014987	0.737021	0	0.593017	0.451604	0.55616	1.19471	1.0588	0.62534	0	0.349008	0.572552	0.352673	0.228284	0	0	1.09353	0	0.679854	1.23736	0.778469	0.577821	0.397782	0.60983	0.421522	0.185504	0.183429	0.142645	0.111611	0	0.908206	0.386296	2.25363	0	0.219416	0.569809	0	2.43925	4.1133	1.08706	0.311999	0	1.62387	0	0.655787	0	0.35115	6.91213	0.721728
hsa-miR-3125	MIMAT0014988	0	0	0	0	0	0	0	0	0	0	0	0	0	0	0	0.72902	0	0	0	0	0	0	0.304915	0	0	0	0	0	0	0	0	0	0	0	0	0	0	0	0	0	0	0	0	0	0	0	0	0
hsa-miR-3126-5p	MIMAT0014989	0	0	0	0	0	0	0	0	0	0	0	0	0	0	0	0	0	0	0	0	0	0.132594	0	0	0	0	0	0	0	0	0	0	0.216499	0	0	0	0	0	0	0	0	0	0	0	0	0	0	0
hsa-miR-3126-3p	MIMAT0015377	0	0	0	0	0	0	0	0	0.79643	0.698016	0	0.352673	0.456568	0	0.527632	0.729019	0	0	0	0.25949	0	0.132594	0	0	0.185504	0.183429	0.285291	0.223221	0	0	0	0.450727	0.649497	1.31649	0	0	0	0	0.543528	0	0	0	0	0.262315	0	0	0	0
hsa-miR-3127-5p	MIMAT0014990	2.21106	3.79222	7.70922	5.19345	3.89312	16.7259	3.7058	2.50136	5.57501	4.88611	4.86669	1.76336	3.65254	38.8213	6.85922	8.38372	13.9077	7.47839	44.5448	7.5252	8.0895	7.29268	3.9639	7.37664	2.22604	6.9703	6.13375	1.56255	6.24224	0.605471	5.02185	3.60581	12.5569	7.24071	5.12828	4.68169	6.50465	4.1133	5.43528	2.96399	8.0403	3.24774	1.95653	9.44332	13.455	2.45805	3.70293	2.64634
hsa-miR-3127-3p	MIMAT0019201	0	0.541746	0	0	0	0.597354	0	0	0.79643	0	0.286276	0	0.684852	0	0.527632	0	0	0	6.18678	0	0	0.397783	0.304915	0.210761	0	0.917145	0.855872	0.111611	0	0.302735	0	0	0.865996	0.219416	0	0	0.813082	0	0.543528	0.311999	0.446683	0.270645	0	1.70504	0.480536	0	0.740585	0.481152
hsa-miR-3128	MIMAT0014991	0	0	0.593017	0.225802	0	0	0.5294	0	0	0	0.286276	0	0	1.04923	0	0.36451	0	0	1.23736	0.25949	1.15564	0.132594	0.304915	0	0	0.183429	0.570581	0	0	0	0	0	0.432998	0.219416	0	0	0.813082	0	0	0	0.446683	1.35323	0	0	0	0	0	0
hsa-miR-3129-5p	MIMAT0014992	0	0	0	0.225802	0	0	0	0	0.79643	0	0.286276	0.352673	0.228284	0	0	0	0	0.679854	0	0	0	0	0	0	0	0	0	0	0	0	0	0	0.432998	0	0	0.668813	0	0.514163	0	0	0	0	0.652176	0	0.480536	0	0	0.240576
hsa-miR-3129-3p	MIMAT0019202	0	0.541746	0.593017	0.451604	0.27808	1.19471	0.5294	1.25068	1.59286	0	0.286276	0	0	0	0.527632	0.729019	1.15898	0.679854	0	0.25949	0	0	0.304915	0.210761	0.371007	0	0.142645	0	0.445874	0.302735	0	0	0.216499	0	1.13962	0.668813	0	0	0	0.155999	0	0	0.652176	0.786944	0	0.7023	0	0.240576
hsa-miR-3130-5p	MIMAT0014995	28.0068	2.70873	1.77905	3.38703	4.17121	4.77883	0.5294	10.0054	5.57501	7.32916	5.15297	6.70078	8.44651	7.34458	2.63816	11.6643	1.15898	3.39927	9.89885	1.55694	7.51168	17.3698	3.9639	7.16587	14.4693	8.80459	0	4.1296	4.45874	9.99026	10.0437	2.70436	25.9799	14.7008	17.6641	11.3698	25.2055	29.3073	11.4141	31.6679	3.12678	4.33033	5.21741	13.7715	6.72751	5.96956	30.6108	11.7882
hsa-miR-3130-3p	MIMAT0014994	0.737021	1.08349	0	1.12901	0.27808	0	0	0.62534	0	0.349008	0.572552	0	0	0	0	0	0	0.679854	0	0.51898	0	0	0	0.421522	0.185504	0.550287	0.285291	0	0	0.302735	0	0	0.432998	0.658247	0.569809	0	0	2.05665	0.543528	0.155999	0	0.54129	0	0	0.480536	0	0	0.481152
hsa-miR-3131	MIMAT0014996	0	0	0	0	0	0	0	0	0	0	0	0	0	0	0	0	0	0	0	0	0	0.397782	0	0	0	0	0	0	0	0	0	0	0.432998	0.219416	0	0	1.62616	0	0	0	0	0	0	0.393472	0	0	0	0
hsa-miR-3132	MIMAT0014997	0	0	0	0	0	0	0	0	0	0	0	0	0	0	0	0	0	0	0	0	0	0	0	0	0	0	0	0	0	0	0	0	0	0	0	0	0	0	0	0	0	0	0	0	0	0	0	0
hsa-miR-3133	MIMAT0014998	0	0	0.593017	0	0	0	0	0	0	0	0	0	0	0	0	0	0	0	0	0	0	0	0	0	0	0	0	0.111611	0	0	0	0	0	0	0	0	0	0	0	0.155999	0	0	0	0	0	0	0	0
hsa-miR-378b	MIMAT0014999	0	0	0	0	0	0	0	0	0.79643	0	0.286276	0	0.456568	0	0	0	0	0	0	0	0	0.132594	0	0	0	0.183429	0	0	0	0	0	0	0	0	0	0	0	0	0	0.155999	0	0	0	0	0	0	0	0.240576
hsa-miR-3135a	MIMAT0015001	0	0	0	0	0	0	0	0	0	0	0	0	0	0	0	0	0	0	0	0	0	0	0	0.210761	0	0	0	0	0	0	0	0	0.216499	0	0	0	0	0	0	0	0	0	0	0.131157	0	0	0	0
hsa-miR-466	MIMAT0015002	0	0	0	0	0	0	0	0	1.59286	0	0	0	0.228284	0	0	0.36451	0	0	0	0	0.577821	0	0.304915	0.421522	0.927518	0	0.142645	0.334832	0	0	0	0	0	0.219416	0	0	0	0	1.63058	0	0	1.35323	0	0	0.480536	0	0	0
hsa-miR-3136-5p	MIMAT0015003	0	0	0.593017	0.451604	1.66848	2.98677	0	0	0	1.04702	0.286276	0	0.913136	2.09845	1.05526	0.36451	0.579489	0.679854	2.47471	0.25949	0	1.06075	0	0.632283	0.185504	0.917145	0.28529	0.223222	0.891748	0	0.386296	0.450727	0.649497	0.877663	1.70943	2.00644	0.813082	0	1.08706	0.311999	0.893366	1.89452	1.95653	0.131157	0.480536	0	1.72803	0.721728
hsa-miR-3136-3p	MIMAT0019203	0	0	0	0	0	0	0	0	0	0	0	0	0	0	0	0	0	0	0	0	0	0	0	0	0	0	0	0	0	0	0	0	0	0	0	0	0	0	0	0	0	0	0.652176	0	0	0	0	0
hsa-miR-544b	MIMAT0015004	0	0	0	0	0	0.597354	0	0	0	0	0.572552	0	0	0	0	0	0	0	0	0	0	0	0	0	0	0	0	0	0	0	0	0	0	0	0	0	0	0	0	0.311999	0	0	0	0	0	0	0	0
hsa-miR-3137	MIMAT0015005	0	0	0	0.677406	0.27808	0	0	0	0	0	0.286276	0	0.228284	1.04923	0	0	0.579489	0	0	0.25949	0	0.132594	0.304915	0.632283	0.371007	0.550287	0.142645	0	0	0	0	0	0	0.658248	0	0	0	0	0.543528	0.155999	0.446683	0	0	0.524629	0.480536	0	0.740585	0
hsa-miR-3138	MIMAT0015006	0	0	0	0	0	0	0	0	0	0	0	0	0	0	0	0	0	0	0	0	0	0.132594	0	0	0.185504	0	0.142645	0	0	0	0	0	0	0	0	0	0	0	0	0	0	0.541291	0	0	0	0	0	0
hsa-miR-3139	MIMAT0015007	0.737021	0	0	0	0	0	0	0	0	0	0	0	0	0	0	0	0.579489	0	1.23736	0	0	0.265188	0	0.632283	0	0.183429	0	0	0.445874	0	0	0	0	0	0	0	0	0	0	0	0	0	0	0	0	0	0	0
hsa-miR-3140-5p	MIMAT0019204	0	0	0	0	0	0	0	0	0	0	0	0	0	0	0	0.36451	0	0	0	0	0	0	0	0	0	0	0	0	0	0	0	0	0	0	0	0	0.813082	0	0	0	0	0	0	0.262315	0	0	0	0
hsa-miR-3140-3p	MIMAT0015008	0.737021	0.541746	0	0.677406	0.27808	0.597354	0	0.62534	0	0.349008	0.858827	0	0.456568	0	1.05526	0.72902	0	0	1.23736	0.25949	0	0.265188	0	0.632283	0.185504	0	0.142645	0.223221	0	0	0.386296	0	0	0	0.569809	0	1.62616	0.514163	0	0.155999	0.446683	0	0.652176	0.262315	0.480536	0	0.987447	0.240576
hsa-miR-548t-5p	MIMAT0015009	0.737021	0	0	0	0	0	1.0588	0	0.79643	0	0	0	0.228284	0	0.527632	0.36451	0	0.679854	0	0	0	0.132594	0.60983	0.210761	0	0	0.28529	0.111611	0	0	0	0.901453	0.216499	0.877662	0	0	0	0.514163	0	0.155999	0	0.270645	0	0	0.961073	0	0.246862	0.240576
hsa-miR-3141	MIMAT0015010	0	0	0	0	0	0	0	0	0	0	0	0	0	0	0	0	0	0	0	0	0	0	0	0	0	0	0	0	0	0	0	0	0	0	0	0	0	0	0	0	0	0	0	0	0	0	0	0
hsa-miR-3142	MIMAT0015011	0	0	0	0	0	0	0	0	0	0	0	0	0	0	0	0	0	0	0	0	0	0	0	0	0	0	0	0	0	0	0	0	0	0	0	0	0	0	0	0	0	0	0	0	0	0	0	0
hsa-miR-3143	MIMAT0015012	0	0	0.593017	0	0	0	0	0	0	0.349008	0	0	0.228284	0	0	0.72902	0	0	0	0.25949	0	0.132594	0	0.210761	0	0	0.142645	0.223222	0	0	0.386296	0	0	0	0	0	0	0	0	0	0	0	0	0	0	0	0	0.240576
hsa-miR-548u	MIMAT0015013	0	0	0	0	0	0	0	0	0	0	0	0	0	0	0	0	0	0	0	0	0	0	0	0	0	0	0	0	0	0	0	0	0	0	0	0	0	0	0	0	0	0	0	0	0	0	0	0
hsa-miR-3144-5p	MIMAT0015014	0	0	0	0	0	0	0	0	0	0	0.286276	0	0	0	0	0	0	0	0	0	0	0	0	0	0	0	0	0	0	0	0	0	0	0	0	0	0	0	0	0	0	0	0	0	0	0	0	0
hsa-miR-3144-3p	MIMAT0015015	0	0	0	0	0	0	0	0	0	0	1.71766	0	0.228284	0	0	0	1.15898	0	0	0	0	0	0.304915	1.05381	0	1.284	0.28529	0	0	0.60547	0	0	0	0.877664	0	0	0	0	1.08706	0	0	2.70645	0.652176	0	0	0	0	0.240576
hsa-miR-3145-5p	MIMAT0019205	1.47404	0	0	0.677406	0	0	0	0	0	0	0	0	0	0	0	0.36451	0	0	0	1.03796	0.577821	0.132594	0.60983	0	0	0.366858	0	0	0	0	0	0	0	0	1.13962	0	1.62616	0	0	0	0.446683	1.35323	0	0	0	0	0	0
hsa-miR-3145-3p	MIMAT0015016	0	0	0	0	0	0	0	0	0	0	0	0	0	0	0	1.45804	0	0	0	0.25949	0	0	0	0	0	0	0	0	0	0	0	0	0	0	0	0	0	0	0	0	0	0.54129	0	0	0.480536	0	0	0.240576
hsa-miR-1273c	MIMAT0015017	0	0	0	0	0	0	0	0	0	0	0	0	0	0	0	0	0	0	0	0	0	0	0	0	0	0	0	0	0	0	0	0	0	0	0	0	0	0	0	0	0	0	0	0	0	0	0	0
hsa-miR-3146	MIMAT0015018	0	0	0	0	0	0	0.5294	0	0	0.349008	0	0	0	0	0	0.36451	0	0.679854	0	0	0	0	0	0.210761	0	0	0	0	0	0	0	0	0	0	0.569809	0	0	0	0	0	0	0.54129	0.652176	0	0	0	0	0.240576
hsa-miR-3147	MIMAT0015019	0	0	0	0	0	0	0	0	0	0	0	0	0	0	0	0	0	0	0	0	0	0	0.304915	0	0	0	0	0	0	0	0	0	0	0	0	0	0	0	0	0	0	0	0	0.393472	0	0	0	0
hsa-miR-548v	MIMAT0015020	0	3.25048	2.37207	2.03222	3.33696	2.98677	3.1764	1.87602	1.59286	0.698016	0.286276	1.05802	0.913136	3.14768	1.5829	3.28059	2.89744	2.71942	6.18678	4.15184	2.31128	0.795565	2.43932	0.421522	1.11302	1.83429	0.998517	0.669664	1.33762	3.02735	1.93148	3.15509	1.94849	2.41357	2.27923	5.3505	15.4486	2.05665	0	0.467997	4.46683	6.49549	7.82611	0.786944	0.961073	0.35115	0.740586	1.44346
hsa-miR-3148	MIMAT0015021	0	0	0	0	0	0	0	0	0	0	0	0	0	0	0	0	0	0	0	0	0	0	0	0	0	0	0	0	0	0	0	0	0	0	0	0	0	0	0	0	0	0	0	0	0	0	0	0
hsa-miR-3149	MIMAT0015022	0	0	0	0	0	0	0	0	0	0	0	0	0	1.04923	0	1.45804	0	0	0	0	0	0	0	0.210761	0	0	0	0	0	0	0.386296	0	0	0	0	0	0	0	0	0	0	0	0	0	0	0	0	0
hsa-miR-3150a-5p	MIMAT0019206	0	0	0	0	0	0	0	0	0	0	0	0	0	0	0	0	1.15898	0	0	0	0.577821	0.662971	0.304915	0.421522	0.742015	0.183429	0.28529	0.111611	0	0	0	0	0	0.219416	0	0	0	0	0.543528	0	0	0.54129	0	0.393472	0.480536	0	0.493724	0
hsa-miR-3150a-3p	MIMAT0015023	0	0	0	0	0	0	0	0	0	0	0	0	0	0	0	0	0	0	0	0	0	0	0	0	0	0	0	0	0	0	0	0	0	0	0.569809	0	0	0	0	0	0	0.270645	0	0	0	0.35115	0	0
hsa-miR-3151-5p	MIMAT0015024	0	0	0	0	0	0	0	0	0	0.349008	0	0	0	0	0	0.36451	0	0	0	0	0.577821	0	0	0	0	0	0	0	0	0.302735	0	0	0	0	0.569809	0	0	0	0	0	0	0.270645	0	0	0	0.35115	0	0
hsa-miR-3152-5p	MIMAT0019207	0	0	0	0	0	0	0	0	0	0	0	0	0	0	0	1.82255	0.579489	0	0	0	0	0	0	0	0	0.183429	0	0.111611	0	0	0	0	0	0	0	0	0	0	2.17411	0	0	0.270645	0	0	0	0	0	0
hsa-miR-3152-3p	MIMAT0015025	0	0	0	0	0	0	0	0	0	0	0	0	0	0	0	0	0	0	0	0	0	0	0	0	0	0	0	0	0	0	0	0	0	0	0	0	0	0	0	0	0	0	0	0	0	0	0	0
hsa-miR-3153	MIMAT0015026	0	0	0	0	0	0	0	0	0	0	0	0	0	0	0	0	0	0	0	0	0	0	0	0	0	0	0	0	0	0	0	0	0	0	0	0	0	0	0	0	0	0.270645	0	0	0	0	0	0
hsa-miR-3074-5p	MIMAT0019208	15.4774	10.8349	7.70922	5.41925	8.89857	5.37619	7.4116	9.38011	1.59286	8.02718	6.58434	2.82138	6.16367	32.526	13.7184	13.1224	9.27182	4.75898	14.8483	12.4555	10.9786	6.8949	3.65898	5.26903	6.67813	1.65086	7.84549	2.00899	2.67524	3.93556	3.09037	1.80291	6.49497	3.07182	1.13962	8.02575	8.13082	32.3923	35.8728	8.89197	10.2737	3.78904	8.47828	18.4932	23.5463	2.45805	4.93723	2.88691
hsa-miR-3074-3p	MIMAT0015027	0	0	0.593017	0	0	0	0	0	0	0	0	0	0	1.04923	0	0	0	0	0	0	0	0.132594	0	0	0.185504	0	0	0.111611	0	0.302735	0	0	0.216499	0	0	0	0	0.514163	0	0	0	0	0	0.131157	0.480536	0	0	0
hsa-miR-3154	MIMAT0015028	0	0	0	0.451604	0	0	0	0	0	0	0	0	0	0	0	0	0	0	0	0	0	0	0.304915	0.210761	0	0	0.285291	0	0	0	0	0	0.865996	0.438831	0	0	0	0	0	0.623997	0	0.270645	0	0	0	0	0.246862	0
hsa-miR-3155a	MIMAT0015029	0	0	0	0	0	0	0.5294	0	0	0.349008	0	0	0.228284	0	0	0	1.15898	0	0	0	0.577821	0	0	0	0.185504	0.366858	0	0	0	0	0	0	0	0	0.569809	0	0	0	0	0.467998	0	0	0	0	0	0	0	0
hsa-miR-3156-3p	MIMAT0019209	0	0	0	0	0	0	0	0	0	0	0	0	0	0	0	0	0	0	0	0	0	0	0	0	0	0	0	0	0	0	0	0	0	0	0	0	0	0	0	0	0	0	0	0	0	0	0	0
hsa-miR-3157-5p	MIMAT0015031	0.737021	0.541746	0	0.225802	0.27808	0	0	0	0	0	0.286276	0.352673	0	2.09845	0	0.36451	0.579489	0	1.23736	0	0.577821	0.397782	0.304915	0.210761	0.185504	0.183429	0.28529	0.111611	0	0	0.772592	0	0	0.219416	0	0.668813	0	0.514163	0	0	0	1.35323	0	0	0	0	0.493724	0.240576
hsa-miR-3157-3p	MIMAT0019210	0	0	0	0.225802	0.27808	3.58413	0	0	0	0.698016	0	0	0.456568	0	0.527632	0	1.15898	0.679854	3.71207	0	0.577821	0.530377	0.304915	0.210761	0	0.366858	0.427936	0	0.445874	0.302735	0	0.450727	0.216499	0	0	0	0.813082	0	0	0.779997	0.446683	0.541291	0.652176	0.393472	0	0	0	0.481152
hsa-miR-3158-5p	MIMAT0019211	2.21106	0	0	0.225802	0	0	0	0	0	0	0	0.352673	0	0	0	0	0	0.679854	0	0.51898	0.577821	0.132594	0.304915	0.421522	0.185504	0.183429	0.142645	0	0.445874	0	0	0	0.432998	0	0	0	0	0	1.08706	0.311999	0	0.270645	0.652176	0	0.480536	0	0	0
hsa-miR-3158-3p	MIMAT0015032	0.737021	0.541746	0	0.225802	0.27808	0	0	0	0.79643	0.349008	0	0	0	0	0.527632	0	0	0.679854	0	0	0	0.132594	0	0.632283	0.371007	0.183429	0	0.111611	0	0.302735	0	0.901454	0	0	0	0	0	0.514163	1.63058	0	0	0.54129	0	0.131157	0.480536	0	0.987447	0
hsa-miR-3159	MIMAT0015033	0	0	0	0	0	0	0	0	0	0	0	0	0.228284	0	0	0	0	0	0	0	0	0	0	0	0	0	0.142645	0	0	0.302735	0.386296	0	0.649497	0	0	0	0	0.514163	0	0	0	0.54129	0	0	0	0	0	0
hsa-miR-3160-5p	MIMAT0019212	0	0	0	0	0	0	0	0	0	0	0	0	0	0	0	0	0	0	0	0	0	0	0	0	0	0	0	0	0	0	0	0	0	0	0	0	0	0	0	0	0	0	0	0	0	0	0	0
hsa-miR-3160-3p	MIMAT0015034	0	0	0	0	0	0	0	0	0	0	0	0	0	0	0	0	0	0	0	0.25949	0	0	0	0.210761	0	0	0	0	0	0	0	0	0	0	0	0	0	0	0	0	0.893366	0	0	0	0	0.35115	0	0
hsa-miR-3161	MIMAT0015035	0	1.08349	0	0	1.94656	0	1.0588	0	0	0.349008	0	0	0.228284	1.04923	2.11053	1.09353	0	0	8.66149	2.33541	3.46693	0	2.74424	0	2.22604	0	0	1.0045	0	0	0	0.450727	0	0	0	1.33763	0	7.71244	0	1.092	0.893366	2.43581	0	0.262314	0.961072	0.702301	1.97489	0
hsa-miR-3162-5p	MIMAT0015036	0	0	0	0	0	0	0	0	0	0	0	0	0	0	0	0	0	0	0	0	0	0	0	0	0	0	0.142645	0	0	0	0	0	0	0	0	0	0	0	0	0	0	0	0	0	0	0	0	0
hsa-miR-3162-3p	MIMAT0019213	0	0	0.593017	0	0	0	0	0	0	0	0	0	0	0	0	0	0	0	0	0	0	0	0	0	0	0	0	0	0	0	0	0	0	0	0	0	0	0	0	0	0	0	0	0	0	0	0	0
hsa-miR-3163	MIMAT0015037	0	0	0	0	0	0	0	0	0	0	0	0	0	0	0	0	0	0	0	0	0	0	0	0	0	0	0.142645	0	0	0	0	0	0	0	0	0	0	0	0	0.311999	0	0	0	0	0	0	0	0
hsa-miR-3164	MIMAT0015038	0	0.541746	0	1.35481	0	0.597354	0	0	0	0	0	0	0	2.09845	0	0.36451	0	0	1.23736	0	0	0.397783	0	0.210761	0	0.550287	0	0	0	0	0	0	0	0	0.569809	0	0.813082	0	0.543528	0	0	0	0	0	0	0	0	0
hsa-miR-3165	MIMAT0015039	0	0	0	0	0	0	0	0	0	0	0	0	0	0	0	0	0	0	0	0	0	0	0	0	0	0	0	0	0	0.302735	0	0	0	0	0	0	0	0	0	0	0	0	0	0	0	0	0.246862	0
hsa-miR-3166	MIMAT0015040	0	0	0	0.225802	0.27808	0	0	0	0	0	0	0	0	0	0	0	0	0	0	0	0.577821	0	0	0	0	0	0	0	0	0	0	0	0	0.219416	0.569809	0	0	0	0	0	0	0	0	0	0	0	0.246862	0
hsa-miR-1260b	MIMAT0015041	0	0	0	0	0	0	0	0	0	0	0.286276	0	0	0	0	0	0	0	0	0.25949	0	0.265188	0	0	0.371007	0.183429	0	0.111611	0	0	0	0	0	0	0	0	0	0	0	0.155999	0	0	0	0	0	0	0	0
hsa-miR-3167	MIMAT0015042	0	0	0	0	0	0	0	0	0	0	0	0	0	0	0	0	0	0	0	0	0	0	0	0	0	0	0	0	0	0	0	0	0	0	0	0	0	0	0	0	0	0	0	0	0	0	0	0
hsa-miR-3168	MIMAT0015043	0	0	0	0	0	0	0	0	0	0	0	0	0	0	0	0.36451	0	0	0	0	0	0	0	0	0	0	0	0	0	0	0	0	0	0.219416	0	0	0	0	0	0	0	0	0	0	0.480536	0	0	0
hsa-miR-3169	MIMAT0015044	0	0	0	0	0	0	0	0	0	0	0	0	0	0	0	0	0	0	0	0	0	0	0	0	0	0	0	0	0	0	0	0	0	0	0	0	0	0	0	0	0	0	0	0	0	0	0	0
hsa-miR-3170	MIMAT0015045	3.6851	0	1.77905	4.29024	0.556161	2.38942	3.7058	1.25068	1.59286	1.74504	0.572552	0.352673	1.3697	4.1969	0	1.82255	2.89744	1.35971	1.23736	2.07592	1.15564	3.04967	1.21966	0.632283	2.04054	1.284	1.28381	0.111611	1.33762	1.81641	0.772592	2.70436	1.94849	2.63299	1.70943	0.668813	7.31773	5.65579	1.08706	0.467998	0.893366	1.08258	0.652176	1.18042	2.88322	1.05345	1.97489	1.68403
hsa-miR-3171	MIMAT0015046	0	0	0	0.451604	0	0	0.5294	0.62534	0	0	0	0	0	0	0	0.36451	0	0	0	0	0	0	0	0	0	0	0.998516	0	1.33762	0.302735	1.15889	0	0.649497	0.658248	0	0	0	0	0	0	0	0.541291	0	0.131157	0	0	0.246862	0
hsa-miR-3173-5p	MIMAT0019214	0	1.62524	0	0.677406	1.11232	0.597354	0.5294	0.62534	0	0.349008	0	0.705346	0	0	0	0.36451	0.579489	0.679854	0	0.77847	0	1.06075	0.304915	0.421522	1.85504	2.20115	0.570581	0.781274	1.33762	0.60547	0.386296	0.901454	0.865996	0	1.13962	0	0.813082	1.02833	0.543528	0.311998	0	0.54129	0.652176	0.262314	0.961073	0.35115	0.493724	0.721728
hsa-miR-3173-3p	MIMAT0015048	0	0	0	0	0	0	0.5294	0	0	0	0	0	0	0	0	0	0	0	0	0	0.577821	0.265188	0	0	0	0.183429	0	0.111611	0	0	0	0	0	0	0.569809	0	0	0	0	0	0	0	0	0	0	0	0.246862	0
hsa-miR-1193	MIMAT0015049	0	0	0	0	0.27808	0	0	0	0	0	0	0	0	0	0	0	0	0	0	0	0	0	0	0	0	0	0	0	0	0	0	0	0.865996	0	0	0	0	0	0	0	0	0	0	0	0	0	0	0
hsa-miR-323b-5p	MIMAT0001630	0	0	0	0	0	0	0	0	0	0	0	0	0	0	0	0	0	0	0	0	0	0	0	0	0	0	0	0	0	0	0	0	0.216499	0	0	0	0	0	0	0	0	0	0	0	0	0	0	0
hsa-miR-323b-3p	MIMAT0015050	6.63319	5.41746	4.74413	121.256	6.67393	47.191	4.7646	25.639	10.3536	2.09405	2.86276	6.34811	8.21822	4.1969	8.96974	2.55157	6.37438	15.6366	11.1362	5.44929	3.46693	0.92816	2.43932	2.95065	4.63759	4.58573	2.71026	1.45094	4.45874	8.17385	0.386296	8.11308	115.827	3.07182	64.9582	4.68169	6.50465	2.05665	4.89175	1.248	130.431	3.24775	211.305	2.7543	1.44161	3.86265	15.3054	3.12749
hsa-miR-3174	MIMAT0015051	0.737021	0.541746	0.593017	0	0.27808	0	1.0588	0.62534	0	0	0	0	0	0	0	0	0	0	0	0	0	0	0.304915	0.210761	0.742015	0	0	0.334832	1.33762	0.302735	0	0.450727	0.216499	0.438832	1.70943	1.33763	0	0	1.08706	0	0	0	0.652176	0.262315	1.92214	0	0	0.240576
hsa-miR-3175	MIMAT0015052	0	0	0	0	0	0	0	0	0	0	0	0	0	0	0	0	0	0	0	0	0	0	0.304915	0	0	0	0	0	0	0.302735	1.54519	0	0	0	0	0	0	0	0	0	0	0	0	0	0	0	0	0
hsa-miR-3176	MIMAT0015053	0	1.08349	0	1.58062	0.556161	0	0	0	0	0	0.286276	0.705346	0	0	1.05526	1.45804	0.579489	0	0	0.51898	1.15564	0.66297	0	0.843044	0.742015	0	0.570581	0	0.445874	0.302735	0.386296	0	0.216499	0.219416	1.13962	0.668813	0.813082	1.54249	0	0.155999	0	0	0	0	0	0	0.493724	0
hsa-miR-3177-5p	MIMAT0019215	0	0	0	0	0	0	0	0	0	0	0	0	0	0	0	0	0	0	0	0	0	0.530376	0	0	0	0	0	0	0	0	0	0	0	0	0	0	0	0	0	0	0	0	0	0	0	0	0	0
hsa-miR-3177-3p	MIMAT0015054	0	0	0	0.451604	0	0	0	0	0	0	0.286276	0.352673	0.228284	0	0	0	0.579489	0	0	0	0	0.265188	0	0.421522	0.185504	0	0.28529	0	0	0	1.15889	0	0.432998	0	0	0	0	0	0	0.467998	0	0	0	0.262314	1.92214	0	0	0.240576
hsa-miR-3178	MIMAT0015055	0	0	0	0	0	0	0	0	0	0	0	0	0	0	0	0	0	0	0	0	0	0	0	0	0	0	0	0	0.445874	0	0	0	0	0.219416	0	0	0	0.514163	0	0	0	0	0	0	0	0	0	0
hsa-miR-3179	MIMAT0015056	0	0	0	0	0	0	0	0	0	0	0	0	0	0	0	0	0	0	0	0	0	0	0	0	0.185504	0	0	0	0	0	0	0	0	0	0	0	0	0	0	0	0	0	0	0	0	0	0	0
hsa-miR-548w	MIMAT0015060	0	0	0	0	0	0	0	0	0	0	0	0	0	0	0	0	0	0	0	0	0	0	0	0	0	0	0	0	0	0	0	0	0	0	0	0	0	0	0	0	0	0	0	0	0	0	0	0
hsa-miR-3181	MIMAT0015061	0	0	0	0	0	0	0	0	0	0	0	0	0.228284	0	0	0	0	0	0	0	0	0	0	0	0	0	0	0	0	0	0	0	0	0	0	0	0	0	0	0.155999	0	0	0	0	0	0.35115	0	0
hsa-miR-3183	MIMAT0015063	0	0	0	0	0	0	0	0.62534	0	0.349008	0	0	0	0	0	0	0	0	1.23736	0	0	0.132594	0	0.210761	0.185504	0.183429	0	0.111611	0	0	0	0	0	0	0	0	0	0	0	0	0	0	0.652176	0.655787	0	0	0	0
hsa-miR-3184-5p	MIMAT0015064	0	0	0	0	0	0	0	0	0	0	0	0	0	0	0	0	0	0	0	0	0	0	0	0	0	0	0	0	0	0	0	0	0	0	0	0	0	0	0	0	0	0	0	0	0	0	0	0
hsa-miR-3184-3p	MIMAT0022731	0	0	0	0	0	0	0	0	0	0	0	0	0	0	0	0	0.579489	0	0	0	0	0	0	0	0	0	0	0	0	0	0	0	0	0	0	0	0	0	0	0	0	0	0	0	0	0	0	0
hsa-miR-3185	MIMAT0015065	0	0	0	0	0	0	0	0	0	0	0	0	0	0	0	0	0	0	0	0	0	0	0	0	0.185504	0	0	0	0	0	0	0	0	0	0	0	0	0	0	0	0	0	0	0	0	0	0	0
hsa-miR-3065-5p	MIMAT0015066	2.21106	3.25048	16.0115	4.06444	8.06433	1.79206	10.0586	0	11.15	25.1286	4.86669	23.9817	6.62024	17.8368	14.7737	11.2998	23.7591	10.1978	8.66149	1.55694	8.66732	0.530376	2.43932	8.6412	4.08108	4.58573	3.1382	5.35731	19.6185	7.56838	3.86296	5.40872	14.9384	6.58247	21.0829	8.69457	0	4.1133	14.6752	0.779997	15.6339	30.8536	0.652176	0.524629	1.44161	7.02301	0	1.20288
hsa-miR-3065-3p	MIMAT0015378	14.7404	10.8349	71.162	20.9996	95.9377	26.8809	50.8224	12.5068	32.6536	94.9301	63.267	89.9315	100.445	88.1349	75.979	81.6502	158.201	33.9927	76.7161	14.0124	91.8736	5.83415	20.4293	70.6049	35.2457	33.5675	34.9481	59.4885	100.322	53.8869	54.4678	29.2972	294.222	100.273	51.2828	36.1159	1.62616	17.4815	81.5291	13.26	71.916	112.047	5.86958	9.18101	65.8335	50.2145	13.5774	14.6751
hsa-miR-3186-5p	MIMAT0015067	0	0	0	0	0	0	0	0	0	0	0	0	0	0	0	0	0	0	0	0	0	0	0	0	0	0	0	0	0	0	0	0	1.08249	0.438832	0	1.33763	0	0	0	0	0	0	0	0	0	0	0	0
hsa-miR-3186-3p	MIMAT0015068	0	0	0	0	0	0	0	0	0	0	0	0	0	0	0	0	0	0	0	0	0	0	0	0	0	0	0	0	0	0	0	0	0	0	0	0	0	0	0	0	0	0	0	0	0	0	0	0
hsa-miR-3187-5p	MIMAT0019216	0	0	0.593017	0.225802	0.27808	0	0	0	0	0	0	0	0	0	0	0	0	0	0	0	0	0.132594	0	0.421522	0	0	0	0	0	0	0	0	0.216499	0	0	0	0	0	0	0	0	0.811936	0	0	0	0	0	0
hsa-miR-3187-3p	MIMAT0015069	0	0	0	0.677406	0	0.597354	0	0	0	0.349008	0.286276	0	0.456568	0	0	0.729019	2.31796	0	2.47471	0	0	1.32594	0.304915	1.47533	0.185504	0	0.427935	0	0.445874	0.302735	0	0	1.08249	0.438831	0	1.33763	0	0	0.543528	0	0	0	1.30435	0.393472	0	0	0.493724	0
hsa-miR-3188	MIMAT0015070	0	0	0	0.677406	0	0	0	0	0	0	0	0.352673	0.228284	0	0	0	0	0	0	0.25949	0	0	0	0.210761	0	0	0.142645	0.111611	0	0	0	0	0	0	0	0	0	0.514163	0	0.155999	0	0	0	0.131157	1.44161	0	0.246862	0.240576
hsa-miR-3189-5p	MIMAT0019217	0	0	0	0	0	0	0	0	0	0	0	0	0	0	0	0	0	0	0	0	0	0	0	0	0	0	0	0	0	0	0	0	0	0	0	0.668813	0	0	0	0	0	0	0	0	0	0	0	0
hsa-miR-3189-3p	MIMAT0015071	0	0	0.593017	0.451604	0.556161	0	0	0	0	0	0	0.352673	0.228284	0	0.527632	0	0	0	0	0	0	0	0	0	0.556511	0	0	0.111611	0	0	0	0.450727	0	0.219416	0	0	0	0	0	0	0	0	0	0	0	0	0	0
hsa-miR-320e	MIMAT0015072	1.47404	0	0	0	0.27808	0	0	0	0.79643	0	0	0	0.228284	0	0	0	0	2.03956	0	0	0	0.132594	0	0.210761	0	0.183429	0.142645	0	0	0	0.386296	0	0.216499	0	0	0.668813	1.62616	2.57081	0.543528	0.623997	0	0	0	0.786943	0	0	0	0.240576
hsa-miR-3190-5p	MIMAT0015073	0	0	0	0	0.27808	0	0.5294	0	0	0	0.286276	0.352673	0	0	0	0	0	0	0	0	0	0	0	0.210761	0	0	0.142645	0.223222	0	0.302735	0	0	0	0.219416	0.569809	2.00644	0	0	0	0.623997	0.446683	0	0	0.393472	0	0	0	0.240576
hsa-miR-3190-3p	MIMAT0022839	0	0	0	0	0	0	0	0	0	0	0	0	0.228284	0	0	0	0	0	0	0	0	0	0	0	0	0	0	0	0	0.302735	0	0	0	0	0	0	0	0	0	0	0	0	0	0	0	0	0	0
hsa-miR-3191-5p	MIMAT0022732	0.737021	0	0	0	0	0	0	0	0	0	0.572552	0	0	0	0	0	0	0	0	0.778469	0	0	0	0.210761	0	0	0	0	0	0.302735	0	0	0	0	0.569809	0	0	0	0	0	0	0.270645	0	0	0	0	0	0
hsa-miR-3191-3p	MIMAT0015075	0	0.541746	0	0	0.834241	1.19471	0	0	0	0.349008	0	0.352673	0	0	0	0.36451	0.579489	0	0	0.77847	0	0	0	0.210761	0.371008	0.366858	0.28529	0.111611	0.445874	0	1.15889	0	0	0	0	1.33763	0.813082	0	0	0.311999	0	0	0	0	0	0	0.493724	0.240576
hsa-miR-3192-5p	MIMAT0015076	0	0	0	0.225802	0.27808	0	0	0	0	0	0	0	0	0	0	0.36451	0.579489	0	0	0	0	0	0	0.210761	0.185504	0	0.142645	0.111611	0	0	0	0.450727	0.432998	0	0	0	0	0	0	0.467998	0	0	0	0	0	0	0	0
hsa-miR-3192-3p	MIMAT0027027	0	0	0	0	0	0	0	0	0	0	0	0	0	0	0	0	0	0	0	0	0	0	0	0	0	0	0	0	0	0	0	0	0.216499	0.219416	0	0	0	0	0	0	0	0	0	0.262314	0	0	0.246862	0
hsa-miR-3193	MIMAT0015077	0	1.08349	0	0.225802	0.55616	1.19471	0	0	0	0.349008	0.858828	0.705346	1.59799	0	0	0	0	0	2.47471	0.51898	0	0	0	1.05381	0.556511	1.284	0.28529	0.446443	0	0	0.386296	0.450727	0	0.219416	0	0	0	0	1.63058	0.623997	0	0.54129	0	0	0.480536	0	0	0
hsa-miR-3194-5p	MIMAT0015078	0	0	0.593017	0	0.27808	0.597354	0.5294	0	0	0.349008	0.286276	0.352673	0.456568	1.04923	0.527632	0	0	0	0	0.25949	0	0.928159	0	0.210761	0.927518	0	0	0	0	0.302735	0	0	0.216499	0	2.27923	0.668813	4.06541	0.514163	0	0	0	0	0.652176	1.18041	0.480536	0	2.71548	0.240576
hsa-miR-3194-3p	MIMAT0019218	0	0	0	0	0	0	0	0	0	0.349008	0	0	0	0	0	0.36451	0	0	0	0.51898	0	0	0	0	0	0	0	0.111611	0	0	0	0.450727	0	0	0	0	0	0.514163	0	0	0.446683	0	0	0	0	0	0.987447	0.481152
hsa-miR-3195	MIMAT0015079	0	0	0	0	0	0	0	0	0	0	2.00393	0	0.228284	0	0	0	0	0	0	0	0	0.132594	0	0	0	0.183429	0	0.111611	0	0	0	0	0	0	0.569809	0	0	0	0	0	0	0	0	0	0	0	0	0
hsa-miR-3196	MIMAT0015080	0	0.541746	0	0	0	0	0	0	0	0	0	0	0	0	0	0	0	0	0	0	0	0	0	0.210761	0	0	0.142645	0	0	0	0	0	0	0.219416	0	0	0	0	0.543528	0.155999	0	0	0	0	0	0.35115	0	0
hsa-miR-548x-3p	MIMAT0015081	0	0	0	0	0	0.597354	0	0	0.79643	0	0	0	0	0	0	0	1.73847	0	0	1.03796	0	0	0.60983	0	0.742015	0.550287	0	0	0	0	0	0	1.29899	0	0.569809	0	0	0	0	0.155999	0	1.62387	0.652176	0.262315	0	0	0	0
hsa-miR-3197	MIMAT0015082	0	0	0	0	0	0	0	0	0	0	0	0	0	0	0	0	0	0	0	0	0	0.132594	0	0.210761	0.556512	0	0	0	0	0	0	0	0	0	0	0	0	0	0	0	0	0	0	0	0	0	0	0
hsa-miR-3198	MIMAT0015083	0	0	0	0.451604	0	0	0	0	0	0	0	0	0.228284	0	0	0	0	0	1.23736	0	0	0	0	0	0	0	0	0.111611	0	0	0	0	0	0.219416	0	0	0	0	0	1.24799	0	0	0	0	0	0.702301	0	0
hsa-miR-3199	MIMAT0015084	0	1.08349	1.77905	0.451604	0.55616	1.19471	1.0588	2.50136	1.59286	0.698016	1.71765	1.05802	0.913136	1.04923	1.05526	0.72902	0.579489	1.35971	1.23736	1.81643	0	1.32594	1.21966	1.89685	0.556512	1.83429	0.998515	0.111611	0	0.60547	7.72593	0	0.432998	3.29123	2.27924	0	0.813082	0.514163	0	1.24799	0.446683	0.54129	0.652176	0.393471	2.40268	0.7023	1.72803	1.20288
hsa-miR-3200-5p	MIMAT0017392	0	0	0	0	0	0.597354	0	0	0	0	0	0	0	1.04923	0	0.36451	0	0	1.23736	0	0.577821	0	0	0.210761	0.185504	0	0	0	0.891748	0	0	0	0	0	0.569809	0	0.813082	0	0	0	0	0	0	0	0	0	0	0
hsa-miR-3200-3p	MIMAT0015085	0.737021	3.79222	4.74413	12.8707	0.556161	14.3365	0.5294	2.50136	3.18572	1.74504	3.43531	4.58475	2.05456	32.526	4.22106	20.048	39.9847	7.47839	76.7161	1.03796	17.9125	16.5743	8.84254	12.2241	20.4054	8.80459	2.99555	0.781275	13.8221	2.11915	2.31778	2.70436	9.52596	1.75532	4.55847	2.00644	1.62616	4.1133	28.807	1.87199	8.0403	4.87162	3.26088	31.3466	30.2738	0.702301	12.3431	0.721728
hsa-miR-514b-5p	MIMAT0015087	0	1.08349	0	0	0	0	0	0	0	0	0	0	0	0	0	5.10314	0	79.5429	0	0	0	0.132594	0	71.448	0.371007	0.183429	0	0.334832	0	0.60547	0.386296	0	0	0	0	0	0	0	1.08706	0.155999	0	0.270645	0	0.262315	0	0	0	0.240576
hsa-miR-514b-3p	MIMAT0015088	0	0	0	0	0.27808	0	0	0	0	0	0	0	0	0	0	0.36451	0	1.35971	0	0	0.577821	0	0	2.52913	0	0	0	0	0.445874	0	0	0	0	0	0	0	0	0	0	0	0	0	0	0	0	0	0	0
hsa-miR-3202	MIMAT0015089	0	0	0	0	0	0	0	0	0	0	0	0	0	0	0.527632	0	0	0	0	0	0	0	0.304915	0	0	0	0	0.111611	0	0.302735	0	0	0	0.658247	0	0	0	0	0	0	0	0	0	0	0	0	0	0
hsa-miR-4295	MIMAT0016844	0	0	0	0	0	0	0	0	0	0	0	0	0	0	0	0	0	0	0	0	0	0	0	0	0	0	0	0	0	0	0	0	0	0	0	0	0	0	0	0	0	0	0	0	0	0	0	0
hsa-miR-4296	MIMAT0016845	0	0	0	0	0	0	0	0	0	0	0	0	0	0	0	0	0	0	0	0	0	0	0	0	0	0	0	0	0	0	0	0	0	0	0	0	0	0	0	0	0	0	0	0	0	0	0	0
hsa-miR-378c	MIMAT0016847	19.8996	4.33397	10.6743	5.87086	1.66848	5.97354	1.0588	6.2534	6.37144	4.18809	5.72552	4.93742	7.30509	8.3938	5.80395	5.46765	5.79489	9.51796	8.66149	3.89235	15.6012	1.98891	8.84254	5.26903	2.41155	5.13601	7.41756	7.25469	7.13399	5.1465	10.43	4.50727	4.32998	3.94948	13.1056	10.701	9.75698	3.59914	1.63058	8.73597	3.12678	9.20194	1.95653	3.41009	0.961072	7.02301	7.15899	8.66074
hsa-miR-4306	MIMAT0016858	0	0	0	0	0	0	0	0	0	0	0	0	0	0	0	0	0	0	0	0	0	0	0	0	0	0	0.142645	0.111611	0	0	0	0	0	0	0	0	0	0	0	0	0	0.270645	0	0.262315	0	0.35115	0	0
hsa-miR-4315	MIMAT0016866	0	0	0	0	0	0	0	0	0	0	0	0	0	0	0	0	0	0	0	0	0	0	0	0	0	0	0.142645	0	0	0	0	0	0	0	0	0	0	0	0	0	0	0	0	0	0	0	0	0
hsa-miR-4320	MIMAT0016871	0	0	0	0	0	0	0	0	0	0	0	0	0	0	0	0	0	0	0	0	0	0	0	0	0	0	0	0	0	0	0	0	0	0	0	0	0	0	0	0	0	0	0	0	0	0	0	0
hsa-miR-4322	MIMAT0016873	0	0	0	0	0	0	0	0	0	0	0	0	0	0	0	0	0	0	0	0	0	0	0	0	0	0	0	0	0	0	0	0	0	0	0	0	0	0	0	0	0	0	0	0	0	0	0	0
hsa-miR-4323	MIMAT0016875	0	0	0	0	0	0	0	0	0	0	0	0	0	0	0	0	0	0	0	0	0	0	0	0	0	0	0	0	0	0	0	0	0	0	0	0	0	0	0	0	0	0	0	0	0	0	0	0
hsa-miR-4258	MIMAT0016879	0	0	0	0	0	0	0	0	0	0	0	0	0	0	0	0	0	0	0	0	0	0	0	0	0	0	0	0	0	0	0	0	0	0	0	0	0	0	0	0	0	0	0	0	0	0	0	0
hsa-miR-4254	MIMAT0016884	0	0	0	0	0.27808	0	0	0	0	0	0	0	0	0	0	0	0	0	0	0.25949	0	0	0	0	0	0	0	0	0	0	0	0	0.865996	0	0	0	0	0	0	0	0	0	0	0	0	0	0	0
hsa-miR-4326	MIMAT0016888	1.47404	3.79222	0	7.90307	6.67393	7.16825	2.647	5.00272	5.57501	9.42321	7.15689	1.76336	5.93538	3.14768	7.38685	8.38372	8.69234	6.11869	18.5603	0	13.8677	12.5965	6.0983	4.8475	6.86363	0	4.70729	6.2502	1.33762	3.02735	7.72593	4.05654	3.68048	4.60773	0	16.0515	9.75698	0	6.52233	2.65199	7.14693	0	11.087	4.85282	0.480536	7.37416	5.1841	3.36807
hsa-miR-2355-5p	MIMAT0016895	41.2732	43.3397	57.5226	47.8701	58.953	66.9037	94.7626	75.0408	125.04	74.3387	89.0318	30.3299	89.9439	53.5105	34.2961	27.3382	58.5284	156.366	150.957	76.809	28.8911	137.898	32.9308	88.5196	40.6253	190.399	24.9629	47.3229	35.2241	125.938	25.8819	81.1308	44.3823	23.9163	210.259	56.8491	67.4858	48.3313	80.4421	21.0599	41.5415	102.845	24.1305	27.6742	97.0683	46.3519	173.05	53.1673
hsa-miR-2355-3p	MIMAT0017950	7.37021	3.79222	5.93017	2.70962	3.89312	7.16825	2.647	3.1267	7.9643	3.83909	5.72552	2.11604	3.42426	2.09845	1.5829	2.91608	8.11285	18.3561	12.3736	3.63286	2.31128	7.42528	2.43932	10.7488	7.97665	28.7984	1.14116	3.68315	1.7835	9.08206	0.386296	3.15509	4.97948	1.97474	42.1658	6.01932	2.43925	1.54249	5.43528	2.02799	0.893366	13.2616	3.26088	4.06588	3.36375	5.61841	6.17154	5.0521
hsa-miR-4280	MIMAT0016911	0	0	0	0	0	0	0	0	0	0	0	0	0	0	0	0	0	0	0	0	0	0	0	0	0	0	0	0	0	0	0	0	0	0	0	0	0	0	0	0	0	0	0	0	0	0	0	0
hsa-miR-4284	MIMAT0016915	0	0	0	0	0	0	0	0	0	0	0	0	0	0	0	0	0	0	0	0	0	0.132594	0	0	0	0	0	0	0	0	0	0	0	0	0	0	0	0	0	0.155999	0	0	0	0	0	0	0	0
hsa-miR-4286	MIMAT0016916	0	0	0	0	0	0.597354	0	0.62534	0.79643	0.698016	0.572552	0	0.228284	0	0	0	0	0	0	0	0	0.265188	0	0.843044	0.371007	0	0.142645	0.111611	0.445874	0	0	0	0	0	0	0	0	0	1.08706	0	0.893366	0	0	0.262315	0.480536	0	0.246862	0.240576
hsa-miR-500b-5p	MIMAT0016925	0.737021	3.79222	8.30223	4.29024	5.00545	8.36296	4.2352	4.37738	4.77858	2.44306	6.01179	3.17406	3.19598	4.1969	2.11053	3.28059	8.11285	6.79854	18.5603	1.55694	7.51168	3.18226	5.18356	3.37218	7.42014	4.03544	2.13968	5.35731	4.01287	3.33009	6.56704	2.25363	1.08249	3.51065	3.41885	3.34406	5.69157	4.62747	4.89175	0.935997	4.91352	5.68355	1.30435	1.57389	1.44161	2.1069	3.2092	3.12749
hsa-miR-500b-3p	MIMAT0027032	0	2.16698	1.18603	0.225802	1.66848	0	2.647	0	0.79643	0.349008	2.29021	0	2.51112	3.14768	1.05526	0	1.15898	0.679854	1.23736	0	4.04475	0.265188	2.13441	1.05381	2.04054	0.550287	1.14116	1.33933	0	0	1.54519	0.901454	0.432998	1.31649	0	0.668813	5.69157	2.57082	1.08706	0.467998	1.34005	1.35323	0	0.918101	1.44161	0.35115	0.493724	1.44346
hsa-miR-3605-5p	MIMAT0017981	0.737021	0	0	0.451604	0	0.597354	0	0	0	0.349008	0.572552	0.352673	0	0	0	0.36451	0	0.679854	0	0	0	0.530376	0	0	0.185504	0	0.142645	0	0.891748	0	0.772592	0	0	1.31649	0.569809	0	0	0	1.63058	0	0	0	0	0	0	0.35115	0	0
hsa-miR-3605-3p	MIMAT0017982	2.94808	3.25048	5.33715	9.70949	5.28353	4.77883	2.647	5.00272	7.16787	8.37619	2.00393	3.8794	2.51112	10.4923	5.80395	9.11274	12.7488	7.47839	14.8483	9.86061	4.04475	2.65188	0.914745	1.26457	1.48403	3.11829	1.14116	0.334832	22.7396	5.44923	1.54519	10.3667	2.16499	4.82714	4.55847	2.00644	11.3831	2.05665	4.89175	0.467998	4.02015	4.87162	0.652176	2.62315	0.961073	1.75575	2.71548	4.57095
hsa-miR-3606-5p	MIMAT0017983	0	0	0.593017	0	0	0	0	0	0	0	0	0	0	0	0	0	0	0.679854	0	0	0	0	0	0	0	0	0.142645	0	0	0	0	0	0	0	0	0	0	0	0	0	0	0	0	0	0	0	0.246862	0
hsa-miR-3606-3p	MIMAT0022965	0	0	0	0	0	0	0	0	0	0	0	0	0	0	0	0	0	0	0	0	0	0	0	0	0	0	0	0	0	0	0	0	0	0	0	0	0	0	0	0	0	0	0	0	0	0	0	0
hsa-miR-3607-5p	MIMAT0017984	3.6851	1.08349	0.593017	0.677406	0.556161	1.79206	1.0588	0	2.38929	1.04702	0	0.352673	0.456568	1.04923	1.05526	0.72902	1.73847	0	0	0.25949	1.15564	0.265188	0.304915	0.421522	0.185504	0.183429	0.142645	0.558055	1.33762	0.908205	0	0.450727	0.216499	0	14.2452	19.3956	0	1.54249	1.63058	0	0.893366	1.08258	3.26088	0	0	0.35115	0	0.240576
hsa-miR-3607-3p	MIMAT0017985	168.041	131.102	125.72	99.1271	88.9857	116.484	112.762	129.445	141.765	276.414	38.361	138.248	84.9216	205.648	157.234	119.924	95.0362	104.018	106.413	150.764	145.611	35.2701	21.3441	51.6364	47.4889	41.2715	35.6613	42.4121	247.46	136.836	13.5204	115.386	4.11348	3.07182	82.6223	130.418	247.177	444.751	126.098	11.076	164.379	117.731	130.435	5.77092	5.2859	3.86265	47.8912	20.6895
hsa-miR-3609	MIMAT0017986	0.737021	0	0	0	0	0	0.5294	0	0	0	0	0	0.913136	1.04923	0	0	0	0	0	0	0	1.06075	0	0.632283	0	0	0.142645	0.334832	0	0	0.772592	0	0	1.53591	12.5358	16.0515	0	0.514163	0	0.467998	0	0.54129	0.652176	0.262314	1.92214	1.05345	0	0.481152
hsa-miR-3610	MIMAT0017987	1.47404	1.08349	0.593017	0.451604	0.834241	1.19471	2.1176	2.50136	1.59286	1.74504	1.71766	1.41069	0	2.09845	0	0.72902	1.15898	2.03956	0	0.51898	0.577821	1.98891	0.304915	0.421522	0.92752	1.65086	2.8529	0.669666	0.445874	0	3.47667	0.450727	0.649497	3.07182	0	0	0.813082	0.514163	1.08706	2.80799	0.446683	0	0.652176	3.80356	0.480536	0.35115	2.46862	1.20288
hsa-miR-3611	MIMAT0017988	0	0	0	0.225802	0	0	0	0	0	0	0	0	0	0	0	0.36451	0	0	0	0	0.577821	0.132594	0	0.210761	0.371008	0	0	0	0	0	0.772593	0	0	0	0	0.668813	0.813082	0	0	0	0	0	0.652176	0	0	0	0	0.240576
hsa-miR-3612	MIMAT0017989	0	0	0	0	0	0	0	0	0	0	0	0	0	0	0	0	0	0	0	0	0	0	0	0	0	0	0	0.111611	0	0	0	0	0	0	0	0	0	0	0	0	0	0	0	0	0	0	0	0
hsa-miR-3613-5p	MIMAT0017990	44.2212	10.8349	7.70922	22.5802	25.0272	23.2968	17.4702	16.2588	22.3	16.0544	2.57648	8.46415	2.73941	11.5415	16.8842	20.4125	31.8719	26.5143	30.9339	15.8289	13.8677	17.7676	9.14746	18.3362	14.6548	29.8989	15.5483	10.045	12.9304	14.2286	4.63556	2.70436	6.71147	10.9708	78.0638	60.862	12.1962	9.7691	14.6752	7.64397	10.7204	27.0645	35.8697	16.1323	4.32483	14.046	3.94979	13.4723
hsa-miR-3613-3p	MIMAT0017991	0	0.541746	0	1.35481	0.834241	0.597354	0.5294	0	0.79643	0.349008	1.1451	0.352673	0.684852	0	1.05526	0	0.579489	0	1.23736	0.25949	0.577821	1.19335	0.60983	0.421522	1.11302	1.10057	1.5691	0.223222	0.445874	0.908206	0.386296	0	0.216499	0.877663	0.569809	1.33763	0	0.514163	0	0.311999	0.893366	0.270645	0	0.52463	0.480536	2.8092	0.246862	0
hsa-miR-3614-5p	MIMAT0017992	0	0.541746	4.74413	1.35481	5.28353	1.79206	2.1176	1.25068	3.98215	1.74504	4.29414	3.17405	4.10911	3.14768	1.5829	0.72902	0.579489	0	3.71207	2.5949	3.46693	0.265188	0.914745	3.7937	2.04054	0.550287	1.99703	10.2682	0.445874	1.51368	18.5422	0.450727	4.76298	13.3843	3.98866	13.3763	3.25233	1.54249	2.17411	5.45998	0.446683	0	1.95653	2.22967	5.2859	3.86265	1.72803	3.60864
hsa-miR-3614-3p	MIMAT0017993	0.737021	0.541746	4.74413	0.677406	1.3904	0	1.0588	0	2.38929	1.39603	1.71765	0.352673	2.28284	0	2.11053	0.72902	0	0	3.71207	2.33541	0	0.265188	0.60983	0.843044	0.371008	0.183429	2.28232	3.57154	0	1.21094	0.772592	0.450727	0.216499	3.07182	2.27923	6.68813	4.87849	0	1.08706	0.311999	0.446683	0.811936	0.652176	0.393471	0	1.4046	1.97489	1.20288
hsa-miR-3615	MIMAT0017994	4.42213	2.16698	2.96509	6.09666	1.3904	1.19471	4.2352	3.75204	8.76073	2.79206	12.3099	3.52673	7.98994	5.24613	5.27632	7.29019	2.31796	2.03956	1.23736	6.22776	5.20039	9.149	8.84254	13.9102	7.04914	8.80459	10.9837	7.70114	2.67524	0.60547	5.40815	2.25363	6.71147	10.5319	1.13962	0	3.25233	14.9107	3.80469	9.82797	0.893366	2.16516	1.95653	4.85282	17.2993	7.72531	11.8494	12.51
hsa-miR-3616-5p	MIMAT0017995	0	0	0	0	0	0	0	0	0	0	0	0	0	0	0	0	0.579489	0	0	0	0	0	0	0	0	0	0	0	0	0	0	0	0.216499	0.219416	0	0	0	0	0	0	0	0	0	0	0	0	0	0.240576
hsa-miR-3616-3p	MIMAT0017996	0.737021	0.541746	0	0.903208	0	1.79206	0	0	1.59286	0	0.572552	0	0	0	0	0	1.73847	0	0	0	1.15564	0.132594	0	0.421522	0.371008	0	0	0	0.445874	0.302735	0	0.450727	1.94849	0	0.569809	0	0	0	0	0	0.446683	0.270645	0.652176	0.262315	0	0	0.740586	0.481152
hsa-miR-3617-5p	MIMAT0017997	0	0	0	0	0	0	0	0	0	0.349008	0	0	0	0	0	0	0	0	0	0	0	0	0	0.210761	0	0	0	0	0	0	0	0	0	0	0	1.33763	0	0	0	0	0	0	0	0	0	0	0	0
hsa-miR-3617-3p	MIMAT0022966	0	0	0	0.225802	0	0	0	0	0	0.698016	0	0	0	0	0.527632	0	0.579489	0	1.23736	0	0	0	0	0.632283	0.742015	0.183429	0	0	0.445874	0.302735	0	0	0.216499	0	0	0.668813	0	1.02833	0	0	0	0	0	0	0	0	0	0
hsa-miR-3618	MIMAT0017998	0	0	0	0	0	0	0	0	0	0	0	0	0	0	0	0	0	0	0	0	0.577821	0	0	0	0	0	0	0	0	0	0	0	0	0	0	0	0	0	0	0	0	0	0	0	0	0	0	0
hsa-miR-3619-5p	MIMAT0017999	0	0	0	0	0	0	0.5294	0	0	0	0	0.352673	0	0	0	0.729019	0	0	0	0	0	0	0	0.210761	1.66953	0	0	0.111611	0	0	0	0	0	0	1.13962	0	0	0	0	0	0.446683	0.541291	0	0.918101	0	0	0.246862	0
hsa-miR-3619-3p	MIMAT0019219	0	0	0.593017	0.451604	0	0	0	0	0	0	0.572552	0.352673	0.228284	0	0.527632	0	0	0.679854	0	0.51898	0	0.132594	0	0.210761	2.22604	0.917145	0	0.111611	0.891748	0.302735	0.386296	0	0.216499	0	0	0	0	0	0	0	0	0	0	0.786944	0	0	0.493723	0.240576
hsa-miR-23c	MIMAT0018000	3.6851	3.79222	6.52319	0.225802	0	0	3.7058	2.50136	2.38929	3.83909	0	1.05802	0.228284	2.09845	0.527632	0.729019	1.15898	0.679854	0	0.25949	0.577821	0.928159	1.21966	1.26457	0	0.733716	0.998516	1.45094	16.0515	1.21094	1.54519	1.35218	4.11348	2.41357	0	2.00644	0.813082	1.54249	3.26117	0.779996	4.46683	5.9542	1.30435	1.70504	0.480536	1.4046	0.987447	0.240576
hsa-miR-3620-5p	MIMAT0022967	0	0	0	0	0	0	0	0	0	0	0.286276	0	0.228284	1.04923	0	0.36451	0	0	0	0	0	0.265188	0	1.05381	0	0	0	0	0	0	0.772592	0	0	0	0	0	0	0.514163	0	0	0	0.270645	0	0	0	0	0	0
hsa-miR-3620-3p	MIMAT0018001	0	0	0	0.451604	0	0	0	0	0	0	0.286276	0.352673	0.228284	0	0	1.09353	0.579489	0	0	0	0.577821	0.530376	0.304915	0.210761	0	0.366858	0	0.111611	0.445874	0	0	0	0	0	0	0	0	0.514163	0	0	0	0	0	0	0	0.35115	0.246862	0
hsa-miR-3621	MIMAT0018002	0	0	0	0	0	0	0	0	0	0	0	0	0	0	0	0	0	0	0	0	0	0	0	0	0	0	0	0	0	0	0	0	0	0	0	0	0	0	0	0	0	0	0	0	0	0	0	0
hsa-miR-3622a-5p	MIMAT0018003	0	0	0	0	0	0	0	0	0	0	0	0	0.228284	0	0	0	0	0	0	0	0	0.132594	0	0	0	0.183429	0	0	0	0	0	0	0	0	0	0	0	0	0	0	0	0	0	0	0	0	0	0
hsa-miR-3622a-3p	MIMAT0018004	0	0.541746	0	0	0.27808	1.19471	0	0	0	0	0.572552	0	0.228284	0	0	0.72902	1.15898	0	1.23736	0.25949	0	0	0	0	0	1.10057	1.28381	0.111611	0	0	0.386296	0	0	0	0	0	0	0	1.63058	0.155999	0	0.811936	0	0.52463	0	0	0.740585	0.721728
hsa-miR-3622b-5p	MIMAT0018005	0	0	0	0	0	0	0	0	0	0	0	0	0	0	0	0	0	0	0	0	0	0	0	0	0	0	0	0	0	0	0	0	0	0	0	0	0	0	0	0	0	0	0	0	0	0	0	0
hsa-miR-3622b-3p	MIMAT0018006	0	0	0	0	0	0	0	0	0	0	0.286276	0	0	0	0	0	0	0	0	0	0	0	0	0	0	0	0	0	0	0	0	0	0	0	0	0	0	0	0	0.155999	0	0	0	0	0	0	0	0
hsa-miR-3646	MIMAT0018065	0	0	0	0	0	0.597354	0	0	0	0	0	0	0.228284	0	0	0	0	0	0	0	0	0	0	0	0.185504	0.183429	0	0	0	0	0	0.450727	0	0	0	0	0	0	0	0	0	0	0	0	0	0	0	0
hsa-miR-3648	MIMAT0018068	4.42213	0.541746	1.18603	1.35481	0.27808	1.19471	4.7646	0.62534	1.59286	0	1.43138	2.11604	0.684852	2.09845	1.5829	2.18706	8.11285	2.03956	1.23736	0	1.15564	0.66297	0.60983	2.10761	0.556512	0.366858	7.13226	0.558055	1.33762	0.60547	2.31778	0.450727	1.29899	2.63299	1.13962	1.33763	2.43925	1.54249	2.71764	0.779996	0	1.89452	0	0.131157	2.40268	1.4046	0.493724	1.44346
hsa-miR-3649	MIMAT0018069	0	0	0	0	0	0	0	0	0	0	0	0	0	0	0	0	0	0	0	0	0	0	0	0	0	0	0	0	0	0	0	0	0	0	0	0	0	0	0	0	0	0	0	0	0	0	0	0
hsa-miR-3650	MIMAT0018070	0	0	0	0.451604	0	0	0	0	0	0	0	0	0	0	0	0	0.579489	0	0	0	0	0.132594	0	0.210761	0	0	0	0	0.445874	0	0	0	0	0.438831	0	0	0	0	0	0	0	0	0	0	0	0	0	0.481152
hsa-miR-3651	MIMAT0018071	2.94808	0	1.18603	0.677406	1.94656	1.79206	1.5882	0.62534	1.59286	1.39603	2.29021	0.705346	1.59799	2.09845	1.05526	5.46765	1.15898	0.679854	1.23736	2.85439	1.73346	3.04967	0.60983	5.05826	2.96806	0.550287	3.28084	2.00899	0.445874	0.605471	0.772593	0	0.216499	0.658248	1.70943	4.68169	0.813082	3.59914	0.543528	0.623997	0.446683	1.35323	1.95653	0.262314	0.480536	0.7023	0.987447	1.20288
hsa-miR-3652	MIMAT0018072	0.737021	0	0	0.451604	0	0	0	0	0	0	0.286276	0	0	0	0	2.18706	0	0.679854	0	0.25949	0.577821	1.06075	0	0.421522	0.185504	0.183429	0	0.111611	0	0	1.54519	0	0	0.438832	0	0	0	0	0.543528	0.935996	0	0.270645	0	0.131157	0	1.4046	0.493724	0.240576
hsa-miR-3653	MIMAT0018073	22.1106	8.66793	17.1975	10.3869	9.17665	8.96031	11.6468	15.0082	23.0965	12.2153	10.0197	15.5176	10.7293	22.0337	12.6632	19.6835	12.1693	11.5575	11.1362	14.2719	14.4455	2.91707	11.2819	12.2241	5.1941	3.85201	8.70136	8.03597	12.9304	6.66018	9.65741	5.40872	2.38149	6.14364	14.2452	24.0773	7.31774	7.19828	9.23997	5.77198	7.59361	26.5232	9.78264	2.62315	4.32483	5.96955	7.65271	5.0521
hsa-miR-3654	MIMAT0018074	0	0	0	0	0.556161	0	0	0	0	0	0	0.352673	0	0	0	0	0	0	0	0	0.577821	0	0.60983	0	0.371008	0.183429	0.57058	0.223222	0	0.302735	0.386296	0.450727	0	0	0	0	0	0.514163	0.543528	0	0.446683	0	0	0.131157	0	0	0.246862	0
hsa-miR-3655	MIMAT0018075	1.47404	0	0	0	0	0.597354	1.0588	0	0.79643	0	0	0	0	0	0	0	0	0	0	0	0	0.132594	0	0	0	0.183429	0	0.111611	0.891748	0	0	0	0	0	0	0.668813	0.813082	0	0	0.155999	0	0	0	0	0	0	0.246862	0.240576
hsa-miR-3656	MIMAT0018076	0	0	0	0	0	0	0.5294	0	0	0	0	0.352673	0	0	0	0	0	0	0	0	0	0	0.304915	0	0	0	0.142645	0	0	0	0	0	0	0	0	0	0	0	0	0	0	0	0	0	0	0	0	0
hsa-miR-3657	MIMAT0018077	0	0	0	0	0	0	0	0	0	0	0	0.352673	0	0	0	0	0	0	0	0	0	0	0	0	0	0	0	0	0	0	0	0	0	0	0	0.668813	0	0	0	0	0	0.270645	0	0	0	0	0	0.240576
hsa-miR-3658	MIMAT0018078	0	0	0	0	0	0	0	0	0	0	0	0	0	0	0	0	0	0	0	0	0	0	0	0	0	0	0	0	0	0	0	0	0	0	0	0	0	0	0	0	0	0	0	0	0	0	0	0
hsa-miR-3659	MIMAT0018080	0	0	0	0	0	0	0.5294	0	0	0	0	0	0	0	0	0	0	0	0	0	0	1.19335	0	0	0.185504	0	0	0	0	0	0	0	0	0	0	0	0	0	0	0	0	0	0	0	0	0.7023	0.246862	0
hsa-miR-3660	MIMAT0018081	0	0	0	0.225802	0	0	0	0	0	0	0	0	0	0	0.527632	1.45804	0	0.679854	0	0.25949	0	0	0.60983	0.210761	0.185504	0	0.285291	0.223222	2.22937	0	0	0.450727	0.649497	0.438831	1.13962	0	0	0.514163	0	0	0	0.541291	0.652176	3.14778	0.480536	0	0.740586	0.240576
hsa-miR-3661	MIMAT0018082	0	0	0	0	0	0	0	0	0	0	0	0	0.228284	0	0	0	0	0	0	0	0	0	0	0	0	0	0	0	0.445874	0	0	0	0	0	0	0	0	0	0.543528	0	0	0	0	0	0	0	0	0
hsa-miR-3662	MIMAT0018083	0	0	1.77905	1.35481	0	1.19471	0	1.25068	2.38929	1.04702	0.572552	1.05802	0.228284	2.09845	0	1.09353	0	0.679854	3.71207	3.37337	1.15564	1.72372	0.60983	0.843044	0.185504	0.550287	0.713226	0.111611	1.33762	0	2.31778	0.450727	2.38149	1.31649	3.41885	0	0.813082	1.54249	1.08706	0	1.34005	1.08258	2.6087	1.31157	3.84429	0	0.493723	1.20288
hsa-miR-3663-5p	MIMAT0018084	0	0	0	0	0	0	0	0	0	0	0	0	0	0	0	0	0	0	0	0	0	0	0.304915	0	0	0	0	0	0	0	0	0	0	0	0	0	0	0	0	0	0	0	0	0.786944	0	0	0	0
hsa-miR-3663-3p	MIMAT0018085	0	0	0	0	0	0	0	0	0	0	0	0	0	0	0	0	0	0	0	0	0	0	1.21966	0	0	0	0.142645	0	0	0	0	0.450727	0.216499	0	0.569809	0	0	0.514163	0	0	0	1.08258	0	3.41009	0	0	0	0
hsa-miR-3664-5p	MIMAT0018086	0.737021	0	0.593017	0.225802	0.27808	0.597354	1.0588	0	0.79643	0	0	0	0.228284	0	1.05526	0.36451	0	1.35971	0	0.51898	1.15564	0.795565	0	0.210761	1.85504	0.917145	0	0.558053	0.891748	0.302735	0	0	0	0	0.569809	0	1.62616	0.514163	0	0.311998	0.446683	0.811936	0	0	0	0.702301	0.246862	0.240576
hsa-miR-3664-3p	MIMAT0019220	0	0	0.593017	0	0	0	0	0	0	0	0	0	0	1.04923	0	0	0	0	0	0	0	0.132594	0	0	0	0.183429	0	0.223221	0	0	0	0	0	0	0.569809	0	0	0	0	0	0	0	0	0	0	0	0	0
hsa-miR-3665	MIMAT0018087	0	0	0	0	0	0	0	0	0	0	0	0	0	0	0	0	0	0	0	0	0	0	0	0	0	0	0	0	0	0	0	0	0	0	0	0	0	0	0	0	0	0	0	0	0	0	0	0
hsa-miR-3667-5p	MIMAT0018089	0	0.541746	1.18603	0.225802	0	0	1.0588	0	0	0.349008	0	0	0.456568	0	0	0	0	0	0	0	0.577821	0	0	1.05381	0.185504	0.183429	0.142645	0.111611	0.891748	0.302735	0	0	0.865996	0	1.70943	0	0.813082	0	0.543528	0	0.893366	0.270645	0.652176	0.786943	0.480536	0	0	0.721728
hsa-miR-3667-3p	MIMAT0018090	0	0	0	0	0	0	0	0	0	0.349008	0	0	0.228284	0	0	0	0	0	0	0	0	0	0	0.421522	0.185504	0.183429	0	0	0	0	0	0	1.94849	0	0	0	0	0	0.543528	0.155999	0.446683	0.270645	0	0	0	0	0	0.481152
hsa-miR-3668	MIMAT0018091	0	0	0	0	0	0	0	0	0	0	0	0	0	0	0	0	0	0	0	0	0	0	0	0	0	0	0	0	0	0	0	0	0	0	0	0	0	0	0	0	0	0	0	0	0	0	0	0
hsa-miR-3674	MIMAT0018097	0	0	0	0	0	0	0	0	0	0	0	0	0	0	0	0	0	0	0	0	0	0	0	0	0	0	0	0	0	0	0	0	0	0	0	0	0	0	0	0	0	0	0	0	0	0	0	0
hsa-miR-3675-5p	MIMAT0018098	0	0	0	0	0	0	0	0	0	0	0	0	0	0	0	0	0	0	0	0	0	0	0	0	0	0	0	0	0	0	0	0	0	0	0	0	0	0	0	0	0	0	0	0	0	0	0	0
hsa-miR-3675-3p	MIMAT0018099	0	0	0	0	0	0	0	0	0	0	0	0	0	0	0	0	0	0	0	0	0	0	0	0	0	0	0	0	0	0	0	0	0	0	0	0	0	0	0	0	0	0	0	0	0	0	0	0
hsa-miR-3677-5p	MIMAT0019221	2.21106	4.33397	1.18603	1.35481	0.556161	0	3.7058	0	1.59286	0.698016	1.71765	0.705345	0.913136	3.14768	1.05526	1.45804	0.579489	0.679854	3.71207	0.778469	1.73346	1.06075	1.21966	2.73989	0.742014	0.733716	0.855872	0.334833	0.891748	0.60547	2.31778	0	4.32998	2.63299	0.569809	0.668813	0.813082	0.514163	1.63058	2.49599	0.893366	1.89452	0.652176	4.32819	6.72751	0.702301	2.71548	0.721728
hsa-miR-3677-3p	MIMAT0018101	13.2664	5.41746	6.52318	6.99987	5.00545	3.58413	14.8232	4.37738	10.3536	5.93313	4.86669	4.93742	4.10911	9.44303	7.38685	17.861	8.69234	6.11869	33.4086	5.44929	22.535	3.44745	1.21966	17.4932	9.46068	1.83429	3.85142	3.68315	1.7835	3.93556	18.1559	5.40872	24.8974	21.2833	7.97732	6.01931	1.62616	5.14163	7.60939	11.7	5.3602	4.87162	4.56523	36.8552	24.9879	3.86266	3.45606	1.68403
hsa-miR-3678-5p	MIMAT0018102	0.737021	0	1.18603	0.677406	0.55616	0.597354	0.5294	0	2.38929	1.04702	0.572552	0	1.3697	0	1.5829	0.729019	0.579489	0.679854	0	0.25949	0	0.662971	0.60983	0.421522	0.371008	0.183429	0.142645	0.446442	0.445874	0.302735	0.772593	0.450727	0	0.219416	0	0	0	0	1.08706	0.311999	0.446683	0.270645	1.95653	1.18042	0.961072	1.05345	0.493724	0.721728
hsa-miR-3678-3p	MIMAT0018103	0	0	0	0.225802	0	0	0	0	0.79643	0	0	0	0	0	0	0	0	0	0	0.25949	0	0.132594	0	0	0	0	0.427935	0.111611	0	0	0	0	0	0	0	0	0	0.514163	0.543528	0.311999	0	0	0	0.393472	0.480536	0	0.493723	0
hsa-miR-3679-5p	MIMAT0018104	0	0	0	0	0	0	0	0	0	0	0.286276	0	0	0	0	0	0	0	0	0	0	0.530377	0	0.421522	0	0.183429	0.28529	0	0	0	0	0	0	0.877663	0	0	0	0	0	0	0	0	0	0	0.480536	0.35115	0	0
hsa-miR-3679-3p	MIMAT0018105	0.737021	0	0	0	0	0	0	0	0	0	0	0	0	0	0	0	0.579489	0	0	0	0	0.132594	0	0	0	0	0	0	0	0	0	0	0.432998	0.219416	0	0	0	0	0	0	0.446683	0	0.652176	0	0.480536	0	0.246862	0
hsa-miR-3680-5p	MIMAT0018106	0	0.541746	0	0	0	0.597354	0	0	0	0	0	0	0.228284	0	0	0	0	0	1.23736	0	0	0.132594	0	0	0.185504	0	0	0	0	0	0	0	0	0	0	0	0	0	0	0	0	0.54129	0	1.04926	0	0	0	0
hsa-miR-3680-3p	MIMAT0018107	0.737021	0	0	0	0	0	1.0588	0	0	0.349008	0.858828	0	0.456568	0	0.527632	0.72902	1.15898	0.679854	0	0.51898	0.577821	0.132594	0.304915	1.26457	1.29853	0.733716	0.28529	0.111611	0	0	0.772592	0	1.73199	0.219416	0.569809	0	0.813082	2.05665	2.17411	0.155999	0	0.270645	0	1.44273	1.92215	0.7023	0.246862	0.721728
hsa-miR-3681-5p	MIMAT0018108	0	0	0.593017	0	0	0.597354	0	0	0	0	0	0	0.228284	0	0	0	0	0	0	1.03796	0	0	0	0.210761	0	0	0	0	0	0	0	0	0	0	0	0	0	0	0	0	0	0	0.652176	0	0	0	0.493724	0.240576
hsa-miR-3681-3p	MIMAT0018109	0	0	0	0	0	0	0	0	0	0	0	0	0	0	0	0	0	0	0	0	0	0	0	0	0	0	0	0	0	0	0	0	0	0	0	0	0	0	0	0	0	0	0	0	0	0	0	0
hsa-miR-3682-5p	MIMAT0019222	0	0	0	0	0.27808	0	0	0	0	0	0	0	0	0	0	0	0	0	0	0	0	0	0	0	0	0	0	0	0	0	0	0	0	0	0	0	0	0	0	0	0	0	0	0	0	0	0	0
hsa-miR-3682-3p	MIMAT0018110	2.94808	0.541746	2.37207	1.35481	0	2.98677	0	0	1.59286	0.698016	1.43138	0	1.14142	3.14768	0.527632	1.82255	0.579489	1.35971	0	1.55694	1.15564	1.06075	1.82949	2.10761	2.22604	1.83429	2.13968	1.0045	0.445874	0.908206	1.54519	1.80291	3.46399	1.53591	5.12828	2.67525	2.43925	2.05665	1.63058	1.404	0	2.16516	1.30435	3.27893	7.68858	1.4046	2.22175	0.721728
hsa-miR-3683	MIMAT0018111	0	0	0	0	0	0	0	0	0	0	0	0	0	0	0	0	0	0	0	0	0	0	0	0	0	0	0	0	0	0	0	0	0	0	0	0	0	0	0	0	0	0	0	0	0	0	0	0
hsa-miR-3684	MIMAT0018112	1.47404	1.08349	0	0.451604	0.27808	1.19471	0	0	0	0	1.1451	0.352673	0.456568	0	0	3.28059	0.579489	0	0	0.51898	0	0.795565	0.304915	1.89685	0.556511	0.733716	0.427936	0.446442	0.445874	0.302735	0	0.450727	0	1.31649	1.70943	0.668813	0	0.514163	0	0.467998	0	2.70645	1.30435	0.262314	0.480536	0.35115	0.493724	0.481152
hsa-miR-3685	MIMAT0018113	0	0	0	0	0	0	0	0	0	0	0	0	0	0	0	0	0	0	0	0.25949	0	0	0	0.843044	0	0	0	0	0	0	0	0	0	0	0	0.668813	0	0	0	0	0	0	0	0	0	0	0	0.240576
hsa-miR-3686	MIMAT0018114	0	0	0	0	0	0	0	0	0	0	0	0	0	0	0	0	0	0	0	0	0	0	0	0	0	0	0	0	0	0	0	0	0	0	0	0	0	0	0	0	0	0	0	0	0	0	0	0
hsa-miR-3687	MIMAT0018115	1.47404	1.08349	0.593017	1.80642	0.83424	0.597354	3.1764	2.50136	1.59286	1.04702	0.858828	3.8794	0.913136	7.34457	3.69342	2.91608	4.63591	1.35971	0	2.5949	2.31128	1.32594	3.65898	1.47533	0.371008	0	10.841	1.11611	1.7835	0.60547	3.09037	1.35218	5.84547	1.97474	0.569809	4.01288	1.62616	3.08498	3.26117	0.623997	1.78673	5.68355	1.30435	0.524629	0.480536	0.35115	0.740586	1.68403
hsa-miR-3688-5p	MIMAT0019223	0	0	0	0	0	0	0	0	0	0	0	0	0	0	0	0	0	0.679854	0	0	0	0	0	0	0	0	0	0.111611	0	0	0	0	0	0	0	0	0	0	0	0	0	0	0	0	0	0	0	0
hsa-miR-3688-3p	MIMAT0018116	0	0	0	0	0.55616	0	0	0	0	0	0	0	0	0	0	0	0	0	0	0	0	0.265188	0.304915	0.421522	0	0	0.142645	0	0	0	0	0.450727	0	0	0	0	0	0	0	0	0	0.54129	0	0	0	0	0.246862	0
hsa-miR-3689a-5p	MIMAT0018117	0	0	1.18603	0	0	0	0	0	0	1.39603	0	0	0	2.09845	0	0	0	0	0	0	0	0	0	0	0	0	0	0	0	0	0	0	0	0.438832	0	0	0	0	0.543528	0	0	0.270645	0	0	0	0	0	0
hsa-miR-3690	MIMAT0018119	0	0.541746	1.18603	0.677406	1.94656	1.19471	0.5294	0	3.98215	5.93314	0	0.352673	0.456568	3.14768	0.527632	1.09353	0	0	0	0.25949	1.15564	0.397782	0.60983	0.421522	0.927518	0.366858	0	1.0045	0	0.302735	1.15889	1.35218	0.216499	1.09708	0	3.34406	0.813082	1.02833	0.543528	0.311998	0	0.270645	0	0.131157	0	0.35115	0.740585	0
hsa-miR-3691-5p	MIMAT0018120	0.737021	0	1.18603	0.225802	0.27808	0	0.5294	0	1.59286	0	0.286276	0	0	0	0.527632	0.36451	0	0	0	0.25949	0	0.530376	1.21966	0.210761	2.59705	0	1.28381	0.334833	0.445874	0	0	0	0.865996	0.438831	0	0	0	0	0	1.092	0	0.811935	0	0.131157	3.36375	1.4046	0.246862	0.240576
hsa-miR-3691-3p	MIMAT0019224	0	0	0	0	0	0	0	0	0	0	0	0	0	0	0	0	0	0	0	0	0	0	0	0	0	0	0	0	0	0	0	0	0	0	0	0	0	0	0	0	0	0	0	0	0	0	0	0
hsa-miR-3692-5p	MIMAT0018121	0	0	0	0	0	0	0	0	0	0	0	0	0	0	0	0	0	0	0	0	0	0	0	0	0	0	0	0	0	0	0	0	0	0	0	0	0	0	0	0	0	0	0	0	0	0	0	0
hsa-miR-3692-3p	MIMAT0018122	0	0	0	0	0	0	0	0	0	0	0	0	0	0	0	0	0	0	1.23736	0.25949	0	0	0	0.210761	0	0	0	0	0	0	0	0	0	0	0	0	0	0	0	0	0	0.270645	0	0	0	0	0	0
hsa-miR-3180	MIMAT0018178	0	0	0	0	0	0	0	0	0	0	0	0	0	0	0	0	0	0	0	0	0	0	0	0	0	0	0	0	0	0	0	0	0	0	0	0	0	0	0	0	0	0	0	0	0	0	0	0
hsa-miR-3907	MIMAT0018179	0	0	0	0	0	0	0	0	0	0	0	0	0	0	0	0	0	0	0	0	0	0	0	0	0	0	0	0	0	0	0	0	0	0	0	0	0	0	0	0	0	0	0	0	0	0	0	0
hsa-miR-3689b-5p	MIMAT0018180	0	0	0	0	0	0	0	0	0.79643	1.04702	0	0	0	2.09845	0	0	0	0	0	0	0	0	0	0.210761	0.185504	0	0.142645	0	0	0	0	0	0	0	1.70943	0	0	0	0	0	0	0.270645	0	0	0	0	0	0
hsa-miR-3689b-3p	MIMAT0018181	0	0	0	0	0	0	0	0	0	0	0	0	0	0	0	0	0	0	0	0	0	0	0	0	0	0	0	0	0	0	0	0	0	0	0	0	0	0	0	0	0	0	0	0	0	0	0	0
hsa-miR-3909	MIMAT0018183	0	0	0	0.903208	0	0.597354	0	0.62534	0	0.349008	0	0.352673	0.684852	0	0	0	0	0	1.23736	0	0	0.265188	0.304915	0.210761	2.04054	1.10057	0.427936	0.334832	0	0.302735	0.386296	0.450727	0	0.219416	0	0.668813	0.813082	1.02833	0.543528	0.623997	0.446683	0.811936	0	0.655787	0.961072	1.4046	0.493724	0
hsa-miR-3910	MIMAT0018184	0	0	0	0.451604	0.55616	0	0	0.62534	0.79643	0.349008	0	0.352673	0	0	0	0	0	0	1.23736	0.25949	0	0	0	0.210761	0.185504	0	0.855872	0	0	0.302735	0	0.450727	0	0	0	0	0	0	0	0	0	0.270645	0	0.262314	0	0.35115	0	0.240576
hsa-miR-3911	MIMAT0018185	0	0	0	0.451604	0	1.19471	0	0	0	0	0	0	0	0	0	0	0	0.679854	2.47471	0	1.15564	0.397782	0.304915	1.05381	0.371008	0.366858	0.570581	0.111611	0	0	0	0	0.216499	0.438832	0.569809	0	0	0	0	0	0	1.08258	0	0	0.961072	0	0	0.240576
hsa-miR-3912-5p	MIMAT0027036	0	0	0	0	0	0	0.5294	0	0	0.349008	0.286276	0	0	1.04923	0.527632	0.36451	0.579489	0	0	0.25949	0	0.132594	0	0	0	0	0	0	0	0	0	0	0	0	0	0	0	0	1.63058	0.155999	0.446683	0	0	0.393472	0	0	0	0
hsa-miR-3912-3p	MIMAT0018186	0	0	0	0.225802	0.556161	0	0	0	0	0.349008	0.572552	0	0.228284	0	0	0	0.579489	0	0	0	0	0.397782	0.914745	0.843044	0.185504	0.550287	1.42645	1.67416	0.445874	0.302735	2.31778	0.901453	0.649497	0.658247	0.569809	0	0	0.514163	1.08706	1.248	0.446683	0.270645	0.652176	1.04926	0.961073	0.35115	0.493723	0
hsa-miR-3913-5p	MIMAT0018187	2.21106	0	0.593017	2.48382	3.33697	4.18148	1.0588	3.1267	2.38929	1.04702	4.00786	2.46871	2.51112	2.09845	3.16579	0.72902	1.73847	2.03956	0	1.55694	1.15564	9.41419	4.26881	2.95065	3.33907	3.85201	1.99703	1.0045	11.1469	2.72462	2.31778	12.6203	2.38149	6.58247	2.27923	3.34406	0.813082	8.22661	2.17411	3.74399	1.78673	2.9771	5.21741	4.19703	2.40268	2.1069	5.43096	1.92461
hsa-miR-3913-3p	MIMAT0019225	0	0	0	0.225802	0	0	0	0	0	0.349008	0	0.352673	0.456568	0	0	0	0	0	0	0.77847	0	0.397783	0	0.210761	0	0.366858	0	0.223222	1.33762	0	0.386296	0.450727	0	0.877663	0	0	0	0	0	0.311999	0	0.270645	0.652176	0.786944	1.44161	0.35115	0	0.240576
hsa-miR-3914	MIMAT0018188	0	0	0	0	0	0	0	0	0	0	0	0	0	0	0.527632	0	0	0	0	0.25949	0	0	0	0	0	0	0	0	0	0	0	0	0	0	0	0	0	0	0	0	0	0	0	0	0	0	0	0
hsa-miR-3916	MIMAT0018190	0	0	0	0	0	0	0	0	0	0	0	0	0	0	0	0	0	0	0	0	0	0	0	0	0.185504	0	0	0.111611	0	0.302735	0	0	0	0	0.569809	0	0	0	0	0	0	0	0	0	0.480536	0	0	0
hsa-miR-3917	MIMAT0018191	0	0	0	3.61283	0.27808	0	1.5882	0.62534	0.79643	0.698016	1.43138	0.705345	2.05456	2.09845	1.5829	2.91608	1.15898	0.679854	1.23736	1.81643	1.15564	7.55787	0	0.843044	0.371008	2.01772	0.713225	0.446444	0.445874	0	5.40815	0.450727	2.38149	3.29124	0	2.00644	0.813082	1.02833	1.08706	2.02799	1.34005	1.08258	0.652176	4.5905	3.36375	2.1069	2.46862	1.20288
hsa-miR-3918	MIMAT0018192	0	0	0	0	0	0	0.5294	0	0	0	0	0	0	0	0	0	0	0	0	0	0	0	0	0	0	0	0	0	0	0	0	0	0	0	0	0	0	0	0	0	0	0	0	0	0	0	0	0
hsa-miR-3919	MIMAT0018193	0	0	0	0	0	0	0	0	0	0	0	0	0	0	0	0	0	0	0	0	0.577821	9.94457	0.304915	0	0	0	0	0.111611	0	0	0	0	0	0	0	0	0	0	0	0	0	0	0	0	0	0	0	0
hsa-miR-3150b-5p	MIMAT0019226	0	0	0	0	0	0	0	0	0	0	0	0	0.228284	0	0	0	0	0	0	0	0	0	0	0	0	0	0	0	0.445874	0	0	0	0	0	0	0	0	0	0	0.311999	0	0	0	0	0	0	0	0
hsa-miR-3150b-3p	MIMAT0018194	2.94808	0.541746	2.37207	2.93543	3.33696	1.19471	3.1764	2.50136	0.79643	3.49008	1.1451	4.23207	2.28284	4.1969	2.11053	0	0.579489	0	0	0.25949	1.15564	1.19335	0.914745	0.421522	1.29852	0.183429	0	0.334832	1.33762	0.60547	1.93148	3.60581	1.94849	0.658248	3.98866	1.33763	0	2.05665	0	1.55999	2.23341	1.08258	1.30435	1.70504	1.92214	0.702301	0.987447	1.68403
hsa-miR-3920	MIMAT0018195	0	0	1.77905	0.225802	1.3904	0	0	0	0	0.698016	0.286276	0.352673	0.228284	0	0	1.09353	1.73847	0	0	0.51898	0	0.397782	0.304915	0.632283	0.742014	0	0.285291	0	0.445874	1.51368	2.70408	1.35218	0	0	0	0	0	0	1.08706	0	0	0.541291	0	0.131157	0.480536	0	0.740585	0.240576
hsa-miR-3921	MIMAT0018196	0	0	0	0	0	0	0	0	0	0	0	0	0	0	0	0	0	0	0	0	0	0	0.304915	0.210761	0	0	0	0	0	0.302735	0	0	0.216499	0	0	0	0	0	0	0	0	0	0	0	0	0	0	0
hsa-miR-3922-5p	MIMAT0019227	0	0	0	0.677406	0	0	0	0	0	0	0	0	0.228284	0	0	0	0	0	0	0	0	0	0	0	0	0.183429	0	0	0	0	0	0	0	0	0	0.668813	0	0.514163	0	0	0	0	0	0	0	0.35115	0.493723	0
hsa-miR-3922-3p	MIMAT0018197	1.47404	0.541746	1.77905	0.451604	1.11232	2.98677	1.5882	0.62534	0	2.09405	1.71765	0.352673	1.82627	4.1969	0.527632	0	1.73847	2.03956	0	1.55694	0	0.795565	0.914745	1.26457	0.185504	1.46743	0.285291	1.0045	0	1.51368	0	0.901453	0.216499	0	1.70943	4.68169	2.43925	1.54249	1.08706	0.311998	0.446683	0.811936	1.95653	0.131157	0	1.05345	3.45606	1.44346
hsa-miR-3923	MIMAT0018198	0	0	0.593017	0	1.11232	28.0757	0	0	0	0	0.572552	0	0.228284	0	0	0	1.73847	2.03956	0	6.22776	0	0	0	0	0.556511	0	0	0.223221	0	0	0.772592	0	0.216499	1.09708	0	0	0	1.02833	0	0	0	1.08258	0	0.393472	0.480536	0	0	2.88691
hsa-miR-3925-5p	MIMAT0018200	0	0	0	0	0	0	0	0	0	0	0	0	0	0	0	0	0	0	0	0	0	0	0	0	0.185504	0	0	0	0	0	0	0	0	0	0	0.668813	0	0.514163	0	0	0	0	0	0	0	0	0	0
hsa-miR-3925-3p	MIMAT0019228	0	0	0	0	0	0.597354	0	0	0	0	0	0	0	0	0	0	0	0	0	0	0	0.132594	0	0	0	0	0.142645	0	0	0	0	0	0	0	0.569809	0	0	0	0	0	0	0	0	0	0	0	0	0
hsa-miR-3926	MIMAT0018201	0.737021	1.62524	0.593017	0.451604	0.83424	0	0.5294	0.62534	0.79643	1.04702	0.572552	0	0.684852	0	0	0	0.579489	1.35971	0	1.03796	0	0.530376	0	0	0	0.183429	0.28529	0	0.445874	0.605471	0	0.901454	1.29899	0.438831	0	0.668813	0	1.02833	0	1.24799	0	0.270645	1.95653	0.786943	0	0	0	0.240576
hsa-miR-3927-5p	MIMAT0022970	0	0	0	0	0	0	0	0	0	0	0	0	0	0	0	0	0	0	0	0	0	0	0	0	0	0	0	0	0	0	0	0	0	0	0	0	0	0	0	0	0	0	0	0	0	0	0	0
hsa-miR-3927-3p	MIMAT0018202	1.47404	0	0	1.12901	0.27808	1.19471	0.5294	0	0	0	0	0	0.684852	1.04923	0.527632	1.09353	2.31796	2.03956	0	0	1.73346	0	0.60983	0	0	0	0	0	0.445874	0	0	0.450727	0	0	0	0	0	0	0	0.779996	0	1.08258	0	0.131157	0.480536	0.35115	0	0
hsa-miR-676-5p	MIMAT0018203	1.47404	0	0	0.225802	0.27808	0	0	0	0	0	0.286276	0	0	0	0	0	0	0.679854	0	1.03796	0.577821	0	0	0	0	0.366858	0.28529	0.334832	0.445874	0	0	0	0.865996	0	0	0	1.62616	0	0	0.155999	0.446683	0.54129	0	0.262314	0	0	0	0.481152
hsa-miR-676-3p	MIMAT0018204	2.94808	0.541746	0	6.32246	0.556161	1.79206	0	0.62534	3.18572	0.698016	1.43138	0.352673	0.684852	1.04923	1.5829	2.18706	0	1.35971	1.23736	6.22776	3.46693	0	1.21966	1.68609	0.185504	0.366858	0.427936	1.0045	0.891748	0	0.772592	0.450727	0.216499	0.877663	0	0.668813	0.813082	0	0	0.935996	0.893366	2.70645	0	2.49199	3.36375	0	0	0
hsa-miR-3928-5p	MIMAT0027037	0	0	0	0	0	0	0	0	0	0	0	0	0	0	0	0	0	0	0	0	0	0	0	0	0	0	0	0	0	0	0	0	0	0	0	0	0	0	0	0	0	0	0	0.131157	0	0	0	0
hsa-miR-3928-3p	MIMAT0018205	5.15914	1.08349	0	2.48382	2.7808	2.38942	1.0588	3.75204	5.57501	1.04702	3.72159	1.05802	1.82627	12.5907	5.27632	8.01922	3.47693	2.03956	3.71207	4.15184	2.31128	2.65188	0.60983	1.26457	1.48403	1.65086	0.855872	0.558054	8.47161	0.302735	2.70407	2.25363	1.51549	5.7048	3.41885	1.33763	1.62616	10.2833	4.34822	0.467998	6.70025	4.33033	2.6087	12.8534	4.32483	1.05345	2.96234	2.16518
hsa-miR-3929	MIMAT0018206	0	0	0	0	0	0	0	0	0	0	0	0	0	0	0	0	0	0	0	0	0	0	0	0	1.48403	0	0	0	0	0	0	0	0	0	1.13962	0	0	0	0	0	0	0	0	0	0	0	0	0
hsa-miR-3934-5p	MIMAT0018349	1.47404	0	0.593017	4.51604	1.11232	1.79206	1.0588	0	0.79643	0.349008	0.572552	0.705345	0.913136	0	0.527632	1.82255	0.579489	5.43883	7.42413	2.85439	4.04475	3.18226	1.52458	1.26457	1.11302	1.10057	2.8529	3.90637	0.891748	1.21094	3.09037	0.450727	1.29899	5.92422	3.98866	1.33763	0	1.54249	0	0.779997	1.34005	5.9542	0	0.786943	3.36375	1.75575	0.987447	2.64634
hsa-miR-3934-3p	MIMAT0022975	2.94808	3.79222	0	1.35481	1.3904	0	2.647	2.50136	0	0.698016	3.43531	1.05802	2.28284	1.04923	2.11053	1.82255	1.15898	7.47839	8.66149	3.37337	1.73346	6.09933	3.35407	2.31837	1.85504	2.01772	4.422	3.45993	1.33762	2.72462	0.386296	1.80291	3.46399	5.48539	1.70943	0	0.813082	1.54249	0.543528	1.87199	2.6801	2.43581	0.652176	0.786943	5.2859	3.16035	5.43096	2.64634
hsa-miR-3935	MIMAT0018350	0	0	0	0	0	0.597354	0	0	0	0	0	0	0	0	0	0	0	0	0	0	0	0	0	0	0	0	0	0	0	0	0	0	0	0	0	0	0	0	0	0	0	0	0	0	0	0	0	0
hsa-miR-3936	MIMAT0018351	0	0	0	0	0	0	0	0	0	0	0	0	0	0	0	0	0	0	0	0	0	0	0	0	0	0.183429	0	0	0	0	0	0	0	0	0	0	0	0	0	0	0	0	0	0	0	0	0	0
hsa-miR-3937	MIMAT0018352	0	0	0	0	0	0	0	0	0	0	0	0	0	0	0	0	0	0	0	0	0	0.662971	0	0	0.185504	0	0	0	0	0	0	0	0.432998	0	0	0	0	0.514163	0.543528	0	0	0	0	0.393472	0	0	0	0
hsa-miR-3938	MIMAT0018353	0	0	0	0	0	0	0	0	0	0	0	0	0	0	0	0	0	0	0	0	0	0	0	0	0	0	0	0.558054	0.445874	0	0	0	0	0	0	0	0.813082	0	0	0	0	1.35323	0	0.524629	0	0	0	0
hsa-miR-548y	MIMAT0018354	0	0	0	0.451604	0	10.7524	0.5294	0	0.79643	0	0	0	0.228284	7.34458	0	1.82255	7.53336	0	0	2.5949	0	1.45854	0	0.210761	0	0	0	0	8.47161	0.908206	0	0	0	0.877663	0	0	6.50465	8.22661	0	0	4.46683	0.811936	0	3.27893	0	0	0.740585	0.240576
hsa-miR-3939	MIMAT0018355	0	0	0	0	0	0	0	0	0	0	0	0	0.228284	0	0	0	0	0	0	0	0	0.265188	0	0	0	0	0	0	0	0	0.772593	0	0	0	0	0.668813	0	0	0	0.311999	0	0.541291	0	0.393472	0	0	0	0
hsa-miR-3940-5p	MIMAT0019229	0.737021	0.541746	0	1.35481	0	0.597354	1.5882	0	1.59286	0.349008	0.286276	0.352673	1.82627	1.04923	0.527632	1.45804	0	1.35971	3.71207	0.51898	0	0.795565	0.304915	0.421522	1.11302	0.366858	1.71174	1.11611	0	0	6.95333	0.450727	0.649497	0.658247	0	0	0.813082	3.08498	0.543528	1.71599	0.446683	0	0	0.131157	2.88322	0	0.246862	0.962304
hsa-miR-3940-3p	MIMAT0018356	0.737021	0	0	1.35481	0	0	0.5294	0.62534	0	0.349008	0	0	0.684852	0	0	0	1.15898	1.35971	0	0.51898	0	0	0.304915	0.843044	2.78255	0.183429	1.28381	0.558054	0	0	0.772592	0	0.216499	0.658248	0	0	0	0	0.543528	1.092	0.446683	0	0.652176	0.524629	1.44161	0.35115	0.493724	0
hsa-miR-3941	MIMAT0018357	0	0	0	0	0	0	0	0	0	0	0	0	0	0	0	0	0	0	0	0	0	0	0	0	0	0.183429	0	0	0	0	0	0	0	0	0	0	0	0	0	0	0	0.270645	0	0	0	0	0	0
hsa-miR-3942-5p	MIMAT0018358	0.737021	1.08349	0	0.225802	0	0	1.0588	0	0	0	0	0	0	0	0.527632	0.36451	0	0	1.23736	0	0	1.19335	1.21966	0.210761	0.185504	0.366858	0.427936	0.111611	0	0.302735	0.772593	0	1.29899	0.219416	1.13962	0	0.813082	0.514163	0	0.467998	0	1.35323	0	0.52463	0	0	1.23431	0
hsa-miR-3942-3p	MIMAT0019230	0	0	0	0	0	0	0	0	0	0	0	0	0	0	0	0	0	0	0	0	0	0	0.304915	0	0	0	0	0	0	0	0	0	0	0.219416	0	0	0	0	0	0.155999	0	0	0	0	0	0	0	0
hsa-miR-3943	MIMAT0018359	0	0	0	0	0	0	0	0	0	0	0	0	0.228284	0	0	0	0	0.679854	0	0	0	0.132594	0	0.210761	0.185504	0.183429	0.285291	0.111611	0	0	0	0	0	0.438831	0	0	0	0	0	0	0	0	0	0.393472	0	0	0.246862	0
hsa-miR-3944-5p	MIMAT0019231	0	0	0	0	0	0	0	0	0	0	0	0	0	0	0	0	0	0	0	0	0	0	0	0	0.185504	0	0	0	0	0	0.386296	0	0	0	0	0	0	0	0	0	0	0	0	0.131157	0	0	0	0
hsa-miR-3944-3p	MIMAT0018360	0	0	0	0.225802	0	0.597354	0.5294	0	0	0	0.286276	1.05802	0.228284	0	0	0	1.15898	0	0	0.51898	0	0.66297	0.304915	0.421522	0.742015	0.366858	0.427936	0.111611	0	0	0	0	0	0	0	0	1.62616	0	0	0	0	0	0	0.918101	0	0	0.740585	0
hsa-miR-3945	MIMAT0018361	0	0	0	0	0	0	0	0	0	0	0	0	0	0	0	0	0	0	0	0	0	0	0	0	0	0	0	0	0	0	0	0	0	0	0	0	0	0	0	0	0	0	0	0	0	0	0	0
hsa-miR-374c-5p	MIMAT0018443	2.94808	4.87571	0	0.451604	0	0.597354	6.8822	0	0	4.5371	0.286276	5.99544	0	0	0.527632	0	0	1.35971	0	0.77847	0	0	0	0	0	0	0	0	2.22937	6.35744	0	0	0	0	0.569809	2.67525	0.813082	0.514163	5.43528	0	0	4.33033	7.82611	0	0	0	0.246862	0
hsa-miR-374c-3p	MIMAT0022735	0	0	0	0	0	0	0	0	0	0	0	0	0	0	0	0	0	0	0	0	0	0	0	0	0	0	0	0	0	0	0	0	0	0	0	0	0	0	0	0	0	0	0	0	0	0	0	0
hsa-miR-642b-5p	MIMAT0022736	0	0	0	0	0	0	0	0	0	0	0	0	0	0	0	0	0.579489	0	0	0	0.577821	0	0	0	0	0	0	0	0	0	0	0.450727	0	0	0	0	0	0	0	0	0.446683	0	0	0	0	0	0	0
hsa-miR-642b-3p	MIMAT0018444	0	0	0	0	0	0	0	0	0	0	0	0	0	0	0	0	0	0	0	0	0	0	0	0	0	0	0	0	0	0	0	0	0	0	0	0	0	0	0	0.311999	0	0	0	0	0	0	0	0
hsa-miR-550b-2-5p	MIMAT0022737	0	0	0	0	0.27808	0	0	0	0	0	0	0	0	0	0	0	0	0	0	0	0	0	0	0	0	0	0	0	0	0	0	0	0	0	0	0	0	0	0	0.467998	0	0	0	0.393472	0	0	0	0
hsa-miR-550b-3p	MIMAT0018445	0	0	0	0	0	0	0	0.62534	0	0.349008	0	0	0	0	0	0	0	0	0	0	0	0	0	0	0	0	0	0	0	0	0	0	0	0	0	0	0	0	0	0	0	0	0	0.262314	0	0	0	0
hsa-miR-1268b	MIMAT0018925	0	0	0	0	0	0	0	0	0	0.349008	0.286276	0	0	0	0.527632	0	0	0	0	0	0	0	0.304915	0.210761	0	0	0.285291	0	0	0	0	0	0.216499	0	0	0	0	0	0	0	0	0.270645	0	0	0	0	0	0.240576
hsa-miR-548ab	MIMAT0018928	0	0	0	0	0	0	0	0	0	0	0	0	0	0	0	0	0	0	0	0	0	0.132594	0	0	0	0	0.142645	0	0	0	0	0	0	0	0	0	0	0	0	0	0	0	0	0	0	0	0	0
hsa-miR-4417	MIMAT0018929	0	0	0	0	0	0	0	0	0	0	0	0	0	0	0	0	0	0	0	0	0	0	0	0	0	0	0	0	0	0	0	0	0	0	0	0	0	0	0	0	0	0	0	0	0	0	0	0
hsa-miR-378f	MIMAT0018932	0.737021	0	0.593017	0	0	0	1.0588	0	0	0	0.572552	0.705345	0.228284	1.04923	0	0	0	0	0	0	0	0.265188	0	0	0	0.183429	0.285291	0	0	0.302735	0	0	0	0	0	0	0.813082	0	0	0	0.893366	0.270645	0	0	0	0	0	0
hsa-miR-4420	MIMAT0018933	0	0	0	0	0	0	0	0	0	0	0	0	0	0	0	0	0	0	0	0.25949	0	0	0	0	0	0	0	0	0	0	0	0	0	0	0	0	0	0	0	0.155999	0	0	0	0	0	0	0	0
hsa-miR-4421	MIMAT0018934	0	0	0	0	0	0	0	0	0	0	0	0	0	0	0	0	0	0	0	0	0	0	0	0	0	0	0	0	0	0	0	0	0	0	0	0	0	0	0	0	0	0	0	0	0	0	0	0
hsa-miR-4422	MIMAT0018935	0	0	0	0	0.27808	0	0	0	0	0	0	0	0	0	0	0	0	0	0	0	0	0	0	0	0	0	0	0	0	0	0	0	0	0.219416	0	0	0	0	0	0	0	0	0	0	0	0	0	0
hsa-miR-4423-5p	MIMAT0019232	0.737021	0	0	1.58061	0.556161	0	0.5294	0	0	0.698016	6.29807	0.352673	0	0	0	0	1.73847	0	0	0	1.73346	0	0	0.421522	0	0	0	0	0	1.21094	0	0	0.216499	0	0.569809	0	0	0	0.543528	0	1.78673	0.270645	0	0.131157	0	0	0	0.721728
hsa-miR-4423-3p	MIMAT0018936	0	0	0.593017	0	0.27808	0	0	0	0	0.698016	2.57648	0	0.228284	0	0	0	0	0	0	0	1.15564	0.132594	0	0	0.185504	0.183429	0	0	0	0.302735	0	0	0	0	0	0	0	0	0	0	0.446683	0	0	0	0	0	0	0
hsa-miR-378g	MIMAT0018937	0	0	0	0.225802	0	0	0	0	0	0	0	0	0	0	0	0	0	0	0	0	0	0	0	0	0	0.183429	0	0	0	0	0	0	0.216499	0	0	0	0	0	0	0	0	0	0	0	0	0	0	0
hsa-miR-548ac	MIMAT0018938	0	0	0	0	0	0	0	0	0	0	0	0	0	0	0	0	0	0	0	0	0	0	0	0	0	0	0	0	0	0	0	0	0	0	0	0	0	0	0	0	0	0	0	0	0	0	0	0
hsa-miR-4424	MIMAT0018939	0	0	0	0	0	0	0	0	0	0	0	0	0	0	0	0	0	0	0	0	0	0	0	0	0	0	0	0	0	0	0	0	0	0	0	0	0	0	0	0	0	0	0	0.131157	0	0	0	0
hsa-miR-4425	MIMAT0018940	0	0	0	0	0	0.597354	0	0	0	0	0	0	0	0	0	0	0	0	0	0	0.577821	0	0.304915	0	1.11302	0	0	0	0	0	0	0	0	0	0	0	0	0	0	0	0	0	0	0	0	0.35115	0	0
hsa-miR-4426	MIMAT0018941	0	0	0	0	0	0	0	0	0	0	0	0	0	0	0	0	0	0	0	0	0	0	0	0	0	0	0	0.111611	0	0	0	0	0	0	0	0	0	0	0	0	0	0	0	0	0	0	0	0
hsa-miR-4427	MIMAT0018942	0	0	0	0	0	0	0	0	0	0	0	0	0	0	0	0	0	0	0	0	0	0	0	0	0	0	0	0	0	0	0	0	0	0	0	0	0	0	0	0	0	0	0	0	0	0	0	0
hsa-miR-4428	MIMAT0018943	0	0	0	0	0	0	0	0	0	0	0	0	0	0	0	0	0	0	0	0	0	0	0	0	0	0	0	0	0	0	0	0	0	0	0	0	0	0	0	0	0	0	0	0	0	0	0	0
hsa-miR-4429	MIMAT0018944	0	0.541746	0	0	0	0	0	0	0	0	0	0.352673	0	0	0	0	0	0	0	0	0	0	0	0	0	0	0.285291	0	0	0	0.386296	0	0	0	0	0	0	0	1.08706	0	0.446683	0	0.652176	0.131157	0	0	0.246862	0
hsa-miR-4430	MIMAT0018945	0	0	0	0	0	0	0	0	0	0	0	0	0	0	0	0	0	0	0	0	0	0	0	0	0	0	0	0	0	0	0	0	0	0	0	0	0	0	0	0	0	0	0	0	0	0	0	0
hsa-miR-548ad	MIMAT0018946	0	0	0	0	0	0	0	0	0	0	0	0	0	0	0	0	0	0	0	0	0	0	0	0.421522	0	0	0	0	0	0	0	0	0	0	0	0	0	0	0	0	0	0	0	0	0	0	0	0
hsa-miR-4431	MIMAT0018947	0	0	0	0	0	0	0	0	0	0	0	0	0	0	0	0.36451	6.37438	0	2.47471	0.25949	2.31129	0	0	0	0	0	0	0	0	0	0	0	4.11348	0	0	0	0	0	0	0.155999	2.23341	0	0	0	0	0	0	0
hsa-miR-4432	MIMAT0018948	0	0	0	0	0	0	0	0	0	0	0	0	0	0	0	0	0	0	0	0	0	0	0	0	0	0	0	0	0	0	0	0	0	0	0	0	0	0	0	0	0	0	0	0	0	0	0	0
hsa-miR-4433-5p	MIMAT0020956	0	0	0	0.451604	0	2.98677	0	0	0.79643	0	0	0	0.228284	0	0	0	0	0	0	0	1.73346	0	0	0	0	0	0	0.223221	0	0	0	0	0.216499	0	0	0	0	0	0	0	0	0.811936	0	0	0	0	0	0
hsa-miR-4433-3p	MIMAT0018949	0	0	0	0	0	0.597354	0	0	0	0	0	0.352673	0	0	0.527632	0	0	0	1.23736	0	0	0.132594	0.304915	0	0	0	0	0	0	0.302735	0.386296	0	0	0.219416	0	0	0	0	0	0.155999	0.446683	1.35323	0	0	0	0	0	0
hsa-miR-4434	MIMAT0018950	0	0.541746	0.593017	0.451604	0.27808	1.79206	0.5294	0.62534	0	0.698016	0	0.705346	0.228284	2.09845	0	0	1.73847	0	0	0.25949	0.577821	0.265188	0	0.210761	0	0.183429	0.142645	0.111611	0	0.302735	0.772592	0.450727	0.216499	0.219416	0	0	0	0.514163	0	0.779996	0	0.270645	0.652176	0	0.480536	0	0.246862	0.240576
hsa-miR-4435	MIMAT0018951	0	0	0	0	0	0	0	0	0	0	0	0	0	0	0	0.36451	0	0	1.23736	0	0	0.132594	0	0.632283	0.371008	0	0	0.334832	0	0	0.386296	0	0	0	0.569809	0	0	0	0.543528	0.155999	0	0	0	0	0	0	0	0
hsa-miR-4436a	MIMAT0018952	0	0	0	0	0	0	0	0	0	0	0	0	0	0	0	0	0	0	0	0	0	0	0	0	0	0	0	0	0	0	0	0	0	0	0	0	0	0	0	0	0	0	0	0	0	0	0	0
hsa-miR-4437	MIMAT0018953	0	0	0	0.225802	0.27808	0	0	0	0	0	0	0	0	0	0	0.36451	0	0	0	0	0	0	0	0	0	0	0	0	0	0	0	0	0	0	0	0	0	0	0	0	0	0	0	0	0	0	0.246862	0
hsa-miR-4439	MIMAT0018957	0	0	0	0	0	0	0	0	0	0	0	0	0	0	0	0	0	0	0	0	0	0	0	0	0	0	0	0.111611	0	0	0	0	0	0	0	0	0	0	0	0	0	0	0	0	0	0	0	0
hsa-miR-4442	MIMAT0018960	0	0.541746	0	0.451604	0.83424	0.597354	0.5294	0.62534	0	0.349008	0.286276	0.352673	0	0	0.527632	0	0	0	0	0	0.577821	0.928159	0.304915	0.421522	0.371008	0.183429	0.28529	0.111611	0.445874	0.60547	1.15889	0	0.216499	0.438832	0	0.668813	0	0	0	1.40399	0.446683	0.270645	1.30435	0	0.961072	1.4046	1.48117	0
hsa-miR-4443	MIMAT0018961	0.737021	0.541746	0	0.677406	0	0	0	0.62534	0	1.74504	1.71765	1.05802	0	0	0.527632	0	0.579489	0	1.23736	0.25949	0	0.928159	0	0.421522	0.185504	0.917145	0.570581	0.669663	0	0.302735	2.31778	0	1.08249	4.38831	0	2.67525	0	1.54249	0.543528	2.02799	0.446683	0.54129	0.652176	0.131157	0	0.7023	0.987446	0
hsa-miR-4444	MIMAT0018962	1.47404	2.70873	1.77905	2.03222	1.66848	1.79206	2.1176	1.25068	2.38929	0.349008	0.572552	1.76337	0.456568	5.24613	1.05526	1.45804	0.579489	0.679854	0	1.29745	1.15564	1.06075	0.60983	0.632283	0.742016	0.917145	1.28381	1.45094	0.445874	1.81641	1.54518	0.450727	1.51549	1.09708	1.70943	0.668813	3.25233	2.05665	1.08706	1.40399	0.893366	2.9771	0.652176	0.655786	0.961072	0.35115	1.48117	2.40576
hsa-miR-4445-5p	MIMAT0018963	0	0	0	0	0	0	0	0	0	0	0	0	0.228284	0	0	0	0	0	0	0	0	0	0	0	0	0	0	0	0	0	0	0	0	0	0	4.68169	0	0	0	0	0	0	0	0	0	0	0	0
hsa-miR-4445-3p	MIMAT0018964	0	0	0	0	0	0	0	0	0	0	0	0	0	0	0	0	0	0	0	0	0	0	0	0	0	0	0	0	0	0	0	0	0	0	0	0	0	0	0	0	0	0	0	0	0	0	0	0
hsa-miR-4446-5p	MIMAT0019233	0	0	0	0	0	0	0	0	0	0	0	0	0	0	0	0	0	0	0	0	0	0	0	0	0	0	0	0	0	0	0	0	0	0	0	0	0	0	0	0	0	0	0	0	0	0	0	0
hsa-miR-4446-3p	MIMAT0018965	0	0	0	0.903208	0.27808	0	0	0	0	0.698016	0	0	0	1.04923	0	0	1.73847	0	0	0.25949	0	0	0	0.210761	1.29852	0	0.142645	0.334832	0	0.302735	0	0	0.865996	0	0.569809	1.33763	0	0	0	0	0	0	0.652176	0.131157	0	0	0	0
hsa-miR-4448	MIMAT0018967	0	0	0	0	0	0	0	0	0	0	0	0	0	0	0	0	0	0	0	0	0	0	0	0	0	0	0	0	0	0	0	0	0	0	0	0	0	0	0	0	0	0	0	0	0	0	0	0
hsa-miR-4449	MIMAT0018968	2.94808	1.62524	0.593017	3.16123	0.55616	2.38942	5.294	0.62534	0.79643	0	0.286276	0.705346	0.456568	0	0	2.91608	11.0103	1.35971	0	0	1.73346	0.132594	0.914745	1.26457	0.742016	0.183429	1.28381	1.0045	0	0.605471	0	0.901454	1.94849	1.75533	0	0	0	6.16995	1.63058	0.467997	0.446683	0	0	0.786944	1.44161	4.21381	0.493724	2.16518
hsa-miR-548ag	MIMAT0018969	0	0	0	0	0	0	0	0	0	0	0	0	0	0	0	0	0	0	0	0	0	0	0	0	0.185504	0	0	0	0	0	0	0	0	0	0	0	0	0	0	0	0	0	0.652176	0	0	0	0	0
hsa-miR-4450	MIMAT0018971	0	0	0	0	0	0	0	0	0	0	0	0	0	1.04923	0	0	0	0	0	0	0	0	0	0	0	0	0	0	0	0	0	0	0	0	0	0	0	0	0	0	0	0	0	0	0	0	0	0
hsa-miR-548ah-5p	MIMAT0018972	0	0	0	0	0	0	0	0	0	0	0	0	0	0	0	0	0	0	0	0	0	0	0	0.210761	0	0	0	0	0	0	0	0	0.216499	0.438831	0	0	0	0	0	0	0	0	0	0	0	0	0	0
hsa-miR-4451	MIMAT0018973	0	0	0	0	0	0	0	0.62534	0	0	0	0.352673	0	0	0	0	0	0	0	0.25949	0	0	0	0	0	0.183429	0	0	0.445874	0	0	0	0	0	0.569809	0	0	0	0	0.155999	0	0.270645	0	0	0	0	0	0
hsa-miR-4453	MIMAT0018975	0	0.541746	0.593017	0.225802	0.27808	0	0	0	0	0.349008	0.572552	0.352673	0	0	0	0	0	0	0	0.51898	0	0.132594	0.304915	0.210761	0.371008	0	0.28529	0.111611	0	0	0.772593	0	0	0	0	0	0	0	0.543528	0.311998	0	0	0	0	0	0	0	0
hsa-miR-4454	MIMAT0018976	1.47404	1.08349	0.593017	0.225802	0.27808	0.597354	1.5882	0	0	1.04702	0.572552	4.23207	0.228284	0	0	0.36451	0	0	0	0	0.577821	0.265188	0	0.210761	0.742015	0.183429	0	0.111611	0	0.60547	0	0	0	0	0.569809	0	0	1.02833	3.26117	0.155999	0	0.811936	0	0.131157	0	0	0.246862	0.240576
hsa-miR-4457	MIMAT0018979	0	0	0	0	0	0	0	0	0	0	0	0	0	0	0	0	0	0	0	0	0	0	0	0	0	0	0	0	0	0	0.386296	0	0.216499	0.658247	0.569809	0	0	0.514163	0	0	0	0	0	0	0	0	0	0
hsa-miR-4458	MIMAT0018980	0	0	0	0	0	0	0	0	0	0	0	0	0	0	0	0	0	0	0	0	0	0	0	0	0	0	0	0	0	0	0	0	0	0	0	0	0	0	0	0	0	0	0	0	0	0	0	0
hsa-miR-4461	MIMAT0018983	2.94808	0	0.593017	0.225802	0.27808	0	0	0	0	0.698016	1.1451	0	0.913136	2.09845	0	3.6451	0	1.35971	1.23736	0.51898	2.31128	0.397782	2.43932	1.47533	0.185504	1.46743	5.70581	1.45094	0.891748	0	3.09037	0.450727	3.46398	0	0.569809	1.33763	0.813082	0	0.543528	0.935996	0.446683	0.270645	0	0	0.480536	1.75575	0.493723	0
hsa-miR-378h	MIMAT0018984	0	0	0	0	0	0	0	0	0	0	0	0	0	0	0	0	0	0	0	0	0	0	0	0	0	0	0	0.111611	0	0	0	0	0	0	0	0	0	0	0	0	0	0	0	0	0	0	0	0
hsa-miR-4464	MIMAT0018988	0	0	0	0	0	0	0	0	0	0	0	0	0	0	0	0	0	0	0	0	0	0	0	0	0	0	0	0	0	0	0	0	0	0	0	0	0	0	0	0	0	0	0	0	0	0	0	0
hsa-miR-548ai	MIMAT0018989	0	0	0	0	0	0	0	0	0	0	0	0	0	0	0	0	0	0.679854	0	0	0.577821	0	0	0	0	0	0.28529	0	0	0	0	0	0	0.219416	0	0	0	0.514163	0.543528	0	0.446683	0	0.652176	0.131157	0	0	0	0
hsa-miR-4465	MIMAT0018992	0	0	0	0	0	0	0	0	0	0	0	0	0	0	0	0	0	0	0	0	0	0	0	0	0	0	0	0	0	0	0	0	1.29899	0	0	0	1.62616	0	0	0	0	0	0	0	0	0	0	0
hsa-miR-4466	MIMAT0018993	1.47404	0	0	0.677406	0	0.597354	0	0	0	1.04702	0.286276	0	0.456568	0	0	0.36451	0	0	1.23736	0	0	1.06075	0.304915	0	0.927518	0	0	0	0	0	0.772592	0	1.51549	0.219416	0.569809	0	0	0	0.543528	0.155999	0	0.54129	0	0.262314	0	0.35115	0	0.481152
hsa-miR-4467	MIMAT0018994	0	0	0	0	0	0	0	0	0	0	0	0	0	0	0	0	0	0	0	0	0	0	0	0	0	0	0	0	0	0	0	0	0	0	0	0	0	0	0	0	0	0	0	0	0	0	0	0
hsa-miR-4469	MIMAT0018996	0	0	0	0	0.556161	0	0	0	0	0	0	0	0.684852	0	0	0.36451	0	0	0	0.25949	0	0	0	0.210761	0.185504	0	0	0	0	0	0	0	0	0	0	0	0	0	0	0	0	0	0	0	0	0	0	0
hsa-miR-4470	MIMAT0018997	0	0	0	0	0	0	0	0.62534	0	0	0	0	0	0	0	0.72902	0	0	0	0	0	0	0	0.210761	0	0	0	0	0.445874	0	0	0	0	0	0.569809	0.668813	0	0	0	0	0.446683	0	0	0	0	0	0.246862	0
hsa-miR-4471	MIMAT0018998	0	0	0	0	0	0	0	0	0	0	0	0	0	0	0	0	0	0	0	0	0	0	0	0	0	0	0	0	0	0	0	0	0	0	0	0	0	0	0	0	0	0	0	0	0	0	0	0
hsa-miR-4473	MIMAT0019000	0	0	0.593017	0	0.27808	0.597354	1.0588	0	0	0.349008	0	0	0.913136	2.09845	1.5829	1.45804	1.15898	0.679854	1.23736	0	2.88911	0.397783	0.60983	0	0.185504	0.183429	0.713227	0.446443	0.891748	0.908206	0.386296	0.450727	0.865996	0	0	4.68169	0	0	0.543528	0.155999	0	4.05968	0	0.524629	0	0	0.740586	0.962304
hsa-miR-4474-5p	MIMAT0019234	0	0	0	0	0.27808	0	0	0	0	0	0	0	0	0	0	0	0	0	0	0	0	0.132594	0	0	0	0	0	0	0	0.302735	0	0	0	0	0	0	0	0	0	0	0	0	0	0	0	0	0	0
hsa-miR-4474-3p	MIMAT0019001	0	0	0	0	0	0	0.5294	0	0	0	0	0	0.456568	0	0	0	0	0	0	0	0	0.132594	0	0	0	0	0	0.111611	0	0	0	0	0.432998	0.219416	0	0	0	0	0.543528	0	0	0.270645	0	0.262314	0	0	0	0
hsa-miR-4476	MIMAT0019003	0	0	0	0	0	0	0	0	0	0	0	0	0.228284	0	0	0	0	0	0	0	0	0	0	0	0	0	0	0	0	0	0	0	0	0	0	0	0	0	0	0	0	0	0	0	0	0	0	0
hsa-miR-4477a	MIMAT0019004	0	0	0	0	0	0	0	0	0	0	0	0	0	0	0	0	0	0	0	0	0	0	0	0	0	0	0	0	0	0	0	0	0	0	0	0	0	0	0	0	0	0	0	0	0	0	0	0
hsa-miR-4477b	MIMAT0019005	0	0	0	0	0	0	0	0	0	0	0	0	0	0	0	0	0	0	0	0	0	0	0.304915	0	0	0	0	0	0	0	0	0	0	0	0	0	0	0	0	0.155999	0	0	0	0	0	0	0	0
hsa-miR-4478	MIMAT0019006	0	0	0.593017	0	0.27808	0	0	0	0	0	0	0	0.228284	0	0	0	0	0	0	0	0	0	0	0	0	0	0.285291	0	0	0	0.386296	0	0	0	0	0.668813	0	0	0	0.155999	0	0	0	0	0	0.702301	0	0
hsa-miR-3689c	MIMAT0019007	0	0	0	0	0	0	0	0	0	0	0	0	0	0	0	0	0	0	0	0	0	0	0	0	0	0	0	0	0	0	0	0	0	0	0	0	0	0	0	0	0	0	0	0	0	0	0	0
hsa-miR-3689d	MIMAT0019008	0	0	0	0	0	0	0	0	0	0	0	0	0	0	0	0	0	0	0	0	0	0	0	0	0	0	0	0	0	0	0	0	0	0	0	0	0	0	0	0	0	0	0	0	0	0	0	0
hsa-miR-3689e	MIMAT0019009	0	0	0	0	0	0	0	0	0	1.39603	0	0	0	2.09845	0	0	0	0	0	0	0	0	0	0	0	0	0	0	0	0	0	0	0	0	0	0	0	0	0.543528	0	0	0	0	0	0	0	0	0
hsa-miR-3689f	MIMAT0019010	0	0.541746	0	0	0	0	0	0	0	1.39603	0	0	0	4.1969	0	0	0	0	0	0	0	0	0.60983	0.210761	0.185504	0	0	0	0	0	0	0	0	0	0	0	0	0	0.543528	0	0	0.541291	0	0	0	0	0.493723	0
hsa-miR-4479	MIMAT0019011	0	0	0	0	0	0	0.5294	0	0	0	0	0	0.228284	0	0	0	0	0	0	0.25949	0	0.132594	0	0	0	0.183429	0	0	0	0	0	0	0	0	0	0	0	0	0	0	0	0	0	0.131157	0	0	0	0
hsa-miR-3155b	MIMAT0019012	0	0	0	0	0	0	0	0	0	0	0	0	0	0	0	0	0	0	0	0	0	0	0	0	0	0	0	0	0	0	0	0	0	0	0	0	0	0	0	0	0	0	0	0	0	0	0	0
hsa-miR-548ak	MIMAT0019013	0	0	0	0	0	0	0	0	0.79643	0	0	0	0	0	0	0	0	0	0	0	0	0	0	0	0	0	0	0	0	0	0	0	0	0	0	0	0	0	0	0	0	0	0	0	0	0	0	0
hsa-miR-4480	MIMAT0019014	0	0	0	0	0	0	0	0	0	0	0	0	0	0	0	0	0	0	0	0	0	0	0	0	0	0	0	0	0	0	0	0	0	0	0	0	0	0	0	0	0	0	0	0	0	0	0	0
hsa-miR-4482-5p	MIMAT0019016	0	0	0	0	0	0	0	0	0	0	0	0	0	0	0	0	0	0	0	0	0	0	0	0	1.11302	0.183429	0.855872	0.334832	0	0	0	0	0	0	0	0	0	0	0	0	0	0.270645	0	0	1.44161	0	0	0
hsa-miR-4482-3p	MIMAT0020958	0	0	0	0	0	0	0	0	0	0	0	0	0	0	0	0	0	0	0	0.25949	0	0	0	0	0.742015	0	0.427936	0.223222	0	0	0	0	0.216499	0	0	0	0	0	0	0	0	0	0	0	0.480536	0	0	0
hsa-miR-4483	MIMAT0019017	0	0	0	0	0	0	0	0	0	0	0	0	0	0	0	0	0	0	0	0	0	0	0	0	0	0	0	0	0	0	0	0	0	0	0	0	0	0	0	0	0	0	0	0	0	0	0	0
hsa-miR-4484	MIMAT0019018	0	0	0.593017	0.903208	0	0	0.5294	0.62534	0	0.349008	0.572552	0.352673	0.913136	0	0	0.36451	0	0	0	0	0.577821	0.265188	0	0	0.185504	0.183429	0.28529	0.223222	0	0.302735	0	0	0	0.658247	0	0	1.62616	0	0	0.467998	0.446683	0.54129	0	0.262315	0.961073	0	0.246862	0
hsa-miR-4485	MIMAT0019019	0	0	0	0	0	0	0	0	0	0	0	0	0	0	0	0	0	0	0	0	0	0	0	0	0	0	0	0	0	0	0	0	0	0	0	0	0	0	0	0	0	0	0	0	0	0	0	0
hsa-miR-4487	MIMAT0019021	0	0	0	0.225802	0	0	0	1.25068	0	0	0	0	0	0	0.527632	0	0	0	0	0	0	0	0	0.210761	0	0	0	0.111611	0	0	0	0	0	0	0	0	0	0	0	0	0	0	0.652176	0	0	0	0	0
hsa-miR-4488	MIMAT0019022	0	0	0	0	0	0	0	0	0	0	0	0	0	0	0	0	0	0	0	0	0	0	0.60983	0.632283	0	0	0	0.111611	0	0	0	0	0	0.658247	0	0	0	0	0	0.155999	0	0	0	0	0	0	0	0
hsa-miR-4489	MIMAT0019023	0	0	0	0	0	0	0	0	0	0.349008	0	0	0	0	0	0	0	0	0	0	0	0	0	0	0	0	0	0	0	0	0	0	0	0	0	0	0	0	0	0	0	0	0	0	0	0	0	0
hsa-miR-548al	MIMAT0019024	0	0	0	0.451604	0	0	0	0	0	0	0	0	0	0	0	0	0	0	0	0	0	0	0	0	0	0	0	0	0.445874	0	0	0	0	0	0	0	0	0	0	0	0	0.270645	0	0	0	0	0	0
hsa-miR-4490	MIMAT0019025	0	0	0	0	0	0	0	0	0	0	0	0	0	0	0	0	0	0	0	0	0	0	0	0	0	0	0	0	0	0	0	0	0	0.219416	0	0	0	0	0	0	0	0	0	0	0.480536	0	0	0
hsa-miR-4491	MIMAT0019026	3.6851	2.16698	1.18603	1.58062	3.61504	1.19471	0.5294	4.37738	0	0.698016	2.00393	0	2.05456	5.24613	4.74869	0	0.579489	0.679854	11.1362	1.29745	3.46693	1.32594	3.9639	0.632283	0.185504	7.88745	2.28232	0.111611	0.445874	1.21094	1.15889	0.450727	8.44346	1.53591	0	0	2.43925	25.7081	0	3.43199	2.23341	0.270645	0.652176	1.44273	1.44161	0.702301	2.71548	2.88691
hsa-miR-4492	MIMAT0019027	0	0	0	0.225802	0	0	0	0	0	0	0.572552	0.352673	0	0	0	0	0	0	0	0	0	0	0	0	0	0	0.285291	0	0	0	0	0	0.216499	0.438831	0	0	0	0.514163	0	0.155999	0.446683	0.270645	0.652176	0.131157	0.480536	0.35115	0	0
hsa-miR-4493	MIMAT0019028	0	0	0	0	0	0	0	0	0	0	0	0	0	0	0	0	0	0	0	0	0	0	0	0	0	0	0	0	0	0	0	0	0	0	0	0	0	0	0	0	0	0	0	0	0	0	0	0
hsa-miR-4494	MIMAT0019029	0	0	0.593017	0	0	0	0	0	0	0	0	0	0	0	0	0	0	0	0	0	0	0.132594	0	0	0	0.733716	0	0.111611	0	0	0	0	0	0	0	0	0.813082	0	0	0	0	0	0	0	0	0.35115	0.246862	0
hsa-miR-4496	MIMAT0019031	0	0	0	0	0	0	0	0	0	0	0	0	0	0	0	0	0	0	0	0.51898	0	0	0	0	0	0	0	0	0	0	0	0	0	0	0	0	0	0	0	0.155999	0	0	0.652176	0	0	0	0	0.240576
hsa-miR-4497	MIMAT0019032	0.737021	0	0	0.451604	0	0	0	0	0.79643	0	0.286276	0.352673	0.228284	0	0	0.36451	0	0	0	0	0	0.132594	0	0	0	0	0	0	0	0	0	0.450727	0.216499	0.219416	0	0	0	0	0	0.311998	0	0.54129	0	0	0	0.35115	0	0
hsa-miR-4498	MIMAT0019033	0	0	0	0.225802	0	0	0	0	0	0	0	0	0	0	0.527632	0	0	0	0	0	0	0	0	0	0	0	0	0	0	0	0	0	0	0	0	0	0	0	0	0	0	0	0	0	0	0	0	0
hsa-miR-4419b	MIMAT0019034	0	0	0	0	0	0	0	0	0	0	0	0	0	0	0	0	0	0	0	0	0	0	0	0	0	0	0	0	0	0.302735	0	0	0	0	0	0	0	0	0	0.311998	0	0	0	0	0.480536	0	0	0
hsa-miR-4501	MIMAT0019037	0	1.08349	0	0	0	0	0.5294	0	0	0	0	0	0	0	0	0.36451	0	0	0	0	0	15.2483	0	0	2.04054	0	0.570581	0.111611	0	0	1.15889	0	9.30946	6.14364	0	0	0	0	1.08706	0.779996	0	0	0	1.44273	0.480536	0	11.1088	0
hsa-miR-4502	MIMAT0019038	0	0	0	0	0	0	0	0	0	0	0	0	0	0	0	0	0	0	0	0	0	0	0	0.210761	0	0	0	0	0	0	0	0	0	0.219416	0	0	0	0	0	0	0	0	0	0	0	0	0	0
hsa-miR-4503	MIMAT0019039	0	0	0	0	0	0	0	0	0	0	0	0	0	0	0	0	0	0	0	0	0	0	0	0	0	0	0	0	0	0	0	0	0	0	0	0	0	0	0	0	0	0	0	0	0	0	0	0
hsa-miR-4504	MIMAT0019040	0	0	0	0	0	0	0	0	0	0	0	0	0	0	0	0	0	0	0	0	0	0	0	0	0	0	0	0	0	0.302735	0	0	0	0	0	0	0	0	0.543528	0	0	0	0	0	0	0	0	0
hsa-miR-4505	MIMAT0019041	0	0	0	0	0	0	0	0	0	0.349008	0	0	0.456568	0	0	0	0	0	0	0	0	0.132594	0	0	0	0	0.142645	0.223222	0	0	0	0	0	0	0	0	0	0	0	0	0	0	0	0	0	0	0.246862	0
hsa-miR-4506	MIMAT0019042	0	0	0	0	0	0	0	0	0	0	0	0	0	0	0	0	0	0	0	0	0	0	0	0	0	0	0	0	0	0	0	0	0	0	0	0	0	0	0	0	0	0	0	0	0	0	0	0
hsa-miR-2392	MIMAT0019043	0	0	0	0	0	0	0	0	0	0	0	0	0	0	0	0	0	0	0	0	0	0	0	0	0	0	0	0	0	0	0	0	0	0	0	0	0	0	0	0	0	0	0	0	0	0	0	0
hsa-miR-4507	MIMAT0019044	0	0	0	0.225802	0	0	0	0	0	0	0	0	0	0	0.527632	0	0	0	0	0.25949	0	0	0	0.210761	0	0	0	0	0	0	0	0	0	0	0	0	0	0	0	0	0	0	0	0	0	0	0	0.481152
hsa-miR-4508	MIMAT0019045	0	0	0	0	0	0	0	0	0	0	0	0	0	0	0	0	0	0	0	0	0	0	0	0	0	0	0	0	0	0	0	0	0	0	0	0	0	0	0	0	0	0	0	0	0	0	0	0
hsa-miR-4510	MIMAT0019047	0	0.541746	1.18603	0.225802	0.27808	0	0	0	0	0.349008	0	0	0.456568	1.04923	0	0	0	0.679854	0	0.25949	0	0.397782	0.304915	0.632283	0	0	0	0.223222	0	0	3.09037	0	0	0	0	0	0.813082	0	0	0.155999	1.78673	0	0	0	0	0	0	0.240576
hsa-miR-4511	MIMAT0019048	0	0	0	0	0.27808	0	0	0.62534	0.79643	0	0	0	0	0	0	0	0.579489	0	0	0	0	0.132594	0	0.210761	0	0	0	0	0.891748	0	0	0	0	0	0	0	0	0	0	0	0	0.54129	0	0.52463	0	0	0.246862	0
hsa-miR-4512	MIMAT0019049	0	0	0	0.677406	0.556161	0	0	0	0	0	0.572552	0	0	0	0	0.36451	0	0	0	0	0	0	0	0	0.185504	0	0	0.111611	0	0	0	0	0	0	0	0	0	0	0	0	0.446683	0	0	0	0	0	0.246862	0
hsa-miR-4513	MIMAT0019050	0	0	0	0	0	0	0	0	0	0	0	0	0	0	0	0	0	0	0	0	0	0	0	0	0	0	0	0	0	0	0	0	0	0	0	0	0	0	0	0.155999	0	0	0	0	0	0	0.246862	0
hsa-miR-4515	MIMAT0019052	0	0	0.593017	0.225802	0	0	0	0	0.79643	0	0.286276	0	0.228284	0	0	0	1.15898	0	0	0	0	0.132594	0	0	0.185504	0.183429	0	0	0	0.302735	0.772593	0	0.649497	1.09708	0.569809	0	0	0	0	0.155999	0	0	0	0.262314	0	0	0.493724	0.240576
hsa-miR-4516	MIMAT0019053	0	0	0	0	0	0	0	0	0	0	0.858828	0	0	0	0	0	0	0	0	0	0	0	0.304915	0.210761	0	0	0.28529	0	0	0	0	0	0	0.219416	0	0	0	0	0	0.311999	0	0.270645	0	0.131157	0	0.35115	0	0.240576
hsa-miR-4517	MIMAT0019054	0	0	0	0.225802	0	0	0	0	0	0	0	0.352673	0.228284	0	0	0.36451	0.579489	0	1.23736	0.25949	0.577821	0	0	0	0	0	0	0.334832	0	0	0	0	0.216499	0.438831	0	0	0	0.514163	0	0	0	0.270645	0	0	0	0	0	0
hsa-miR-4518	MIMAT0019055	0	0	0	0	0	0	0	0	0	0	0	0	0	0	0	0	0	0	0	0	0	0	0	0	0	0	0	0	0	0	0	0	0	0	0	0	0	0	0	0	0	0	0	0	0	0	0	0
hsa-miR-4519	MIMAT0019056	0.737021	0	0	0	0	0	0.5294	0	0	0	0	0.705346	0.228284	0	0.527632	0.36451	0	0	0	0	0	0.132594	0	0	0	0	0.142645	0	0	0	0	0	0	0	0	0	0	0	0	0.155999	0	0	0.652176	0	0	0	0	0.240576
hsa-miR-4520a-5p	MIMAT0019235	0	0	0	0	0	0	0	0	0	0	0	0	0	0	0	0	0	0.679854	0	0	0	0	0	0	0	0	0	0	0	0	0	0	0	0	0	0	0	0	0	0	0	0	0	0	0	0	0	0
hsa-miR-4520a-3p	MIMAT0019057	0	0	0	0	0	0	0	0	0.79643	0	0	0	0	0	0	0	0	0	0	0	0.577821	0	0	0	0	0	0	0.111611	0	0	0	0	0	0	0	0	0	0	0	0	0	0	0	0.393472	0	0.35115	0	0
hsa-miR-4521	MIMAT0019058	0	0.541746	0	1.12901	0.83424	0	1.0588	0.62534	0	0	0	0.352673	1.3697	0	0	4.73863	0.579489	1.35971	1.23736	0.77847	0.577821	0.265188	0.914745	0.843044	1.85504	0.183429	0.142645	0.334833	1.33762	0.302735	1.15889	0	1.51549	0.658248	0	1.33763	0	0.514163	1.63058	0.311998	0	0.811936	0	0.393471	0.961072	0.35115	0	0
hsa-miR-1269b	MIMAT0019059	29.4808	199.904	2.96508	257.64	0.834241	0	2.1176	0	0.79643	0	0	0.705346	246.318	28.3291	0	239.118	1.15898	0	538.25	0	0	0.265188	163.13	0.210761	22.8169	3.11829	69.183	0.223221	0.891748	84.1604	10.0437	0	0.216499	0	0	0	1001.72	1.02833	0.543528	58.3438	0.893366	54.3997	202.827	0.393472	340.22	0	0.493723	179.951
hsa-miR-4522	MIMAT0019060	0	0	0	0.225802	0	0	0	0	0	0	0	0	0	1.04923	0	2.18706	0.579489	0	0	0	0.577821	1.19335	0	0.210761	0	0	0	0	0.445874	0	0.772593	0	0	0.438832	0	0.668813	0	0	0	0.779997	0.446683	0	0	0.131157	0	0	0.493724	0.240576
hsa-miR-4523	MIMAT0019061	0	0	0	0.451604	0.27808	0	1.0588	0	1.59286	0	0	0	0.228284	1.04923	0	0	0	0	1.23736	0	0	0.66297	0	0	0	0	0.28529	0.334832	0	1.51368	1.54519	0	0	0.877663	0.569809	0	2.43925	0	0	1.55999	0	0	0	0	0	0.35115	0	0
hsa-miR-4524a-5p	MIMAT0019062	0	0	0	0	0	0	0	0	0	0	0	0	0.228284	0	0	0	1.15898	0	0	0	0	0	0	0	0	0	0	0	0	0	0	0	0	0.219416	0	0	0	0	0	0	0	0	0	0	0	0	0	0
hsa-miR-4524a-3p	MIMAT0019063	0	0.541746	0	0	0	0	0	0	0	0.349008	0	0	0	0	0	0	0	0	0	0	0.577821	0	0	0	0	0	0.285291	0	0	0	0	0	0	0	0	0	0	0	0	0	0	0	0	0	0	0	0	0
hsa-miR-4525	MIMAT0019064	0	0	0	0	0	0	0	0	0	0	0	0	0.228284	0	0	0	0	0	0	0	0	0	0	0	0	0	0.142645	0	0	0	0	0	0	0	0	0	0	0.514163	0	0	0	0	0	0	0	0	0	0
hsa-miR-4526	MIMAT0019065	0	0	0	0	0	0	0	0	0	0	0	0	0	0	0	0	0.579489	0	0	0	0	0.265188	0	0	0	0	0	0	0	0	0	0	0	0	0	0	0	0	0	0	0	0	0	0	0	0	0	0
hsa-miR-4527	MIMAT0019066	0	0	0	0	0	0	0	0	0	0	0	0	0	0	0	0.36451	0	0	0	0	0	0	0	0	0	0	0	0	0	0	0.386296	0	0	0	0	0	0	0	0	0	0	0	0	0.262314	0	0	0.246862	0
hsa-miR-4528	MIMAT0019067	0	0	0	0	0	0	0	0	0	0	0	0	0	0	0	0	0	0	0	0	0	0	0	0.843044	0	0	0	0	0	0	0	0	0	0.658247	0	0	0	0	0	0.155999	0	0	0	0	1.44161	0	0	0
hsa-miR-4529-5p	MIMAT0019236	0	0	0	0	0	0	0	0	0	0	0	0	0	0	0	0	0	0	0	0	0	0	0	0	0	0.183429	0	0	0	0	0	0	0	0	0	0	0	0	0	0	0	0	0	0.131157	0	0	0	0
hsa-miR-4529-3p	MIMAT0019068	0	0	0	0.225802	0	0	0	0	0	0	0.286276	0	0.456568	0	0	4.37412	0	0.679854	1.23736	0.25949	0	0	0	0.421522	0.185504	0.550287	0.427935	0	0	0.302735	0	0.450727	0	0	0	0	0	0	0	1.24799	0	0	0	0.131157	0.961073	0.35115	0	0
hsa-miR-4530	MIMAT0019069	0	0	0	0	0	0	0	0	0	0	0	0	0	0	0	0	0	0	0	0	0	0	0	0	0	0	0	0	0	0	0	0	0	0	0	0	0	0	0	0	0	0	0	0	0	0	0	0
hsa-miR-4532	MIMAT0019071	2.94808	1.08349	0	0.451604	1.94656	0	0.5294	0	0	2.79206	5.15296	0.705345	1.59799	0	0	1.09353	1.15898	0	1.23736	0.25949	0	0.397782	0.60983	0.632283	0.185504	0.183429	0.142645	0	0	2.11915	0.386296	0.450727	0.432998	0.219416	0.569809	1.33763	0	0	1.08706	0.467998	0.446683	0.270645	0.652176	0	0	0	0.246862	0
hsa-miR-4533	MIMAT0019072	0	0	0	0	0	0.597354	0	0	0	0	0.286276	0	0.228284	0	0	0	0	0	7.42414	0	0	0	0	0	0	0	0	0	0	0	0.386296	0	0	0.219416	0	0	0	0	0	0	0.446683	0	0	0.131157	0	0.35115	0.493724	0
hsa-miR-378i	MIMAT0019074	0	0	0	0	0	0	0	0	0	0	0	0	0.228284	0	0	0	0	0	0	0	0	0	0	0	0	0	0	0.111611	0	0	0	0	0	0	0	0	0	0	0	0	0	0	0	0	0	0	0	0.240576
hsa-miR-548am-3p	MIMAT0019076	0	0	0	0	0	0	0	0	0	0	0	0	0	0	0	0	0	0	0	0	0	0	0	0	0	0	0	0	0	0	0	0	0	0	0	0	0	0	0	0	0	0	0	0	0	0	0	0
hsa-miR-1587	MIMAT0019077	0	0	0	0	0	0	0	0	0	0	0	0	0	0	0	0	0	0	0	0	0	0	0	0	0	0	0	0	0	0	0	0	0	0	0	0	0	0	0	0	0	0	0	0	0	0	0	0
hsa-miR-4536-5p	MIMAT0019078	0	0	0	0	0	0	0	0	0	0	0	0	0	0	0	0	0	0	0	0	0	0	0	0	0	0	0	0.111611	0	0	0	0	0	0	0	0	0	0	0	0	0	0	0	0	0	0	0	0
hsa-miR-4536-3p	MIMAT0020959	0	0	0	0	0	0	0	0	0	0.349008	0.286276	1.05802	0.456568	0	0.527632	0.36451	0	0	0	0	0	0	0.304915	0.421522	0.371007	0.550287	0.142645	0.223222	0	0.60547	0	0	0.216499	0.658247	0	0	0	0	0.543528	0.155999	0.446683	0.811935	0	0.131157	0	0	0	0
hsa-miR-548an	MIMAT0019079	0	0	0	0	0	0	0	0	0	0	0	0	0	0	0	0	0	0	0	0	0	0	0	0	0	0	0	0	0	0	0	0	0	0	0	0	0	0	0	0	0	0	0	0	0	0	0	0
hsa-miR-4537	MIMAT0019080	0	0	0	0	0	0	0	0	0	0	0	0	0	0	0	0	0	0	0	0	0	0	0	0	0	0	0	0	0	0	0	0	0	0	0	0	0	0	0	0	0	0	0	0	0	0	0	0
hsa-miR-4538	MIMAT0019081	0	0	0	0	0	0	0	0	0	0	0	0	0	0	0	0	0	0	0	0.25949	0	0	0	0	0	0	0	0	0	0	0	0	0	0	0	0	0	0	0	0	0	0	0	0	0	0	0	0
hsa-miR-4539	MIMAT0019082	0	0	0	0	0	0	0	0	0	0	0	0	0	0	0	0	0	0	0	0	0	0	0	0	0	0	0	0	0	0	0	0	0	0	0	0	0	0	0	0	0	0	0	0	0	0	0	0
hsa-miR-4632-5p	MIMAT0022977	0	0	0	0	0	0	0	0	0	0	0	0	0	0	0	0	0	0	0	0	0	0	0	0	0	0	0	0	0	0	0	0	0	0	0	0	0	0	0	0	0	0	0	0	0	0	0	0
hsa-miR-4632-3p	MIMAT0019688	0.737021	0	0.593017	0.677406	0	0	0	0	1.59286	0	0.286276	0	0.913136	0	0	0	0	0	0	0.51898	0	0	0	0	0.371007	0	0	0.223221	0	0.60547	0.386296	0	0	0.658247	0	0	0	0.514163	0	0	0	0.270645	0	0	0	0.7023	0	0
hsa-miR-4633-5p	MIMAT0019689	0	0	0	0	0	0	0	0	0	0	0	0	0	0	0	0	0	0	0	0	0	0	0	0	0	0	0	0	0	0	0	0	0	0	0	0	0	0	0	0	0	0	0	0	0	0	0	0
hsa-miR-4633-3p	MIMAT0019690	0	0	0	0	0	0	0	0	0	0	0	0	0	0	0	0	0	0	0	0	0	0	0	0	0	0	0	0	0	0	0	0	0	0	0	0	0	0	0	0	0	0	0	0	0	0	0	0
hsa-miR-4634	MIMAT0019691	0	0	0	0	0	0	0	0	0	0	0	0.352673	0	0	0	0	1.15898	0	0	0	0	0	0	0	0	0	0	0	0	0	0	0	0	0	0	0	0	0	0	0.155999	0	0.270645	0	0	0	0	0	0
hsa-miR-4635	MIMAT0019692	0	0	0	0	0	0	0	0	0	0	0	0	0	0	0	0	0	0	0	0	0	0	0	0	0.185504	0	0	0	0	0	0	0	0	0	0	0	0	0	0	0	0	0	0	0	0	0	0	0
hsa-miR-4636	MIMAT0019693	0	1.08349	0	0.225802	1.11232	1.79206	0	0	0.79643	0.698016	0	0.352673	0.456568	0	0.527632	0.36451	4.63591	0	0	2.5949	1.73346	0	0	0.210761	0	0	0	0.111611	0	0.302735	0.772592	0.901454	0	0.438831	0.569809	0	0	0	1.08706	0	0.446683	0.270645	1.30435	0	0	0	0	0
hsa-miR-4637	MIMAT0019694	0	0	0	0	0	0	0	0	0	0	0	0	0	0	0	0	0	0	0	0	0	0	0	0	0	0	0	0	0	0	0	0	0	0	0	0	0	0	0	0	0	0	0	0.131157	0	0	0	0
hsa-miR-4638-5p	MIMAT0019695	0	0	0	0	0	0	0	0	0	0	0	0	0	0	0	0	0	0	0	0	0	0	0	0	0	0	0	0	0	0	0	0	0	0.219416	0.569809	0	0	0	0	0.155999	0	0	0	0.131157	0	0	0	0
hsa-miR-4638-3p	MIMAT0019696	2.21106	0.541746	1.18603	3.61283	0.83424	0.597354	1.5882	1.25068	0	2.09405	0.858828	2.11604	0.913136	2.09845	2.11053	1.09353	2.31796	1.35971	2.47471	1.29745	2.88911	1.19335	0	0.843044	1.85504	1.284	0.570581	1.11611	0.445874	0.302735	0.386296	1.80291	1.08249	0.658248	1.70943	2.00644	0.813082	1.02833	1.08706	1.404	3.57347	1.62387	1.95653	1.8362	1.44161	0.35115	0.740585	0.721728
hsa-miR-4639-5p	MIMAT0019697	0	0	0	0	0	0	0	0	0.79643	0	0	0	0	0	0	0	0	0	0	0	0	0	0	0	0	0	0	0	0	0	0	0	0	0	0	0	0	0	0	0	0	0	0	0	0	0	0	0
hsa-miR-4639-3p	MIMAT0019698	0	0	0	0.451604	0	0	0	0	0	0	0	0	0	0	0	0	0	0	0	0.25949	0	0	0	0	0.185504	0	0.142645	0.111611	0	0	0	0	0	0	0	0	0	0	0	0	0	0	0	0	0	0	0	0
hsa-miR-4640-5p	MIMAT0019699	0	0	0	1.12901	0	0	0.5294	0.62534	0	0	0	0.352673	0.456568	0	0	0	0	0	0	0.25949	0.577821	0.132594	0.60983	0	0	0	0.142645	0.892886	0	0	0	0	0.216499	0.877664	0	0	0	0	0	0	0	0	0	0.524629	0.480536	0	0	0
hsa-miR-4640-3p	MIMAT0019700	0	0	0	0	0	0	0	0	0	0	0.572552	0.705346	0.228284	0	0	0	0	0	3.71207	0	0	0	0	0	0.371008	0.366858	0	0.223222	0	0	0	0	0.432998	0.877663	1.13962	0	0	0	0	0.623997	0	0.270645	0	0.131157	0	0.35115	0	0
hsa-miR-4641	MIMAT0019701	0	0	0	0	0	0	0	0	0	0	0	0	0	0	0	0	0	0	0	0	0	0	0	0	0	0	0	0	0	0	0	0	0	0	0	0	0	0	0	0	0	0	0	0	0	0	0	0
hsa-miR-4642	MIMAT0019702	0	0	0	0	0	0	0.5294	0	0	0	0	0	0	0	0	0	0	0	0	0	0	0	0	0	0	0	0	0	0	0	0	0	0	0	0	0	0	0	0	0	0	0	0	0	0	0	0	0
hsa-miR-4643	MIMAT0019703	0	0	0	0	0	0	0	0	0	0	0	0	0	0	0	0.729019	0	0	0	0	0	0	0	0	0.185504	0.366858	0	0.223222	0.445874	0	0	0	0	0	0	0	0	0	0	0	0	0	0	0.131157	0.480536	0	0	0.240576
hsa-miR-4644	MIMAT0019704	0	0	0	0	0	0	0	0	0	0	0	0	0	0	0	0	0	0	0	0	0	0	0	0	0	0	0	0	0	0	0	0	0	0	0	0	0	0	0	0	0	0	0	0	0	0	0	0
hsa-miR-4645-5p	MIMAT0019705	0	0	0	0	0	0	0	0	0	0.349008	0	0	0.228284	0	0	0	0	0	0	0	0	0	0	0	0	0	0	0	0	0	0	0	0	0	0	0	0	0	0	0	0	0	0	0	0	0	0	0
hsa-miR-4645-3p	MIMAT0019706	1.47404	0	1.18603	0.451604	0.55616	0	1.5882	1.87602	0	0.349008	0	0.705346	0.228284	0	0	0	0.579489	0.679854	1.23736	0.25949	0	0.530376	0.60983	0	1.11302	0.183429	0.142645	0.111611	0	0.302735	1.15889	1.35218	0.216499	0	0.569809	1.33763	1.62616	1.02833	0.543528	0.155999	0.446683	1.62387	0	0	0	0.35115	0	0.481152
hsa-miR-4646-5p	MIMAT0019707	0	0	0	0	0	0	0	0	0	0	0	0	0	0	0	0	0	0	0	0	0	0	0	0	0	0	0.28529	0	0	0	0	0	0	0.219416	0	0	0	0	0	0	0	0	0	0	0	0	0	0
hsa-miR-4646-3p	MIMAT0019708	0	0	0	0	0	0	0	0	0	0	0	0.352673	0	0	0	0	0	0	0	0	0	0.132594	0	0.210761	0	0	0.142645	0	0	0	0	0	0.216499	0.219416	0	0	0	0	0	0	0	0	0	0	0.480536	0	0	0
hsa-miR-4647	MIMAT0019709	0	0	0	0.225802	0	0	0	0	0	0	0	0	0	0	0	0	0	0	0	0.51898	0	0	0	0.210761	0	0	0.142645	0.111611	0	0	0	0	0.432998	0.219416	0	0	0	1.02833	0	0	0	0	0	0	0	0	0	0
hsa-miR-4648	MIMAT0019710	0	0	0	0	0.27808	0	0	0	0	0	0	0	0	0	0	0	0	0	0	0.25949	0	0	0	0	0	0	0	0	0	0	0.772592	0	0.432998	0	0	0	0	0	0	0	0	0.270645	0	0.262315	0	0	0	0
hsa-miR-4649-5p	MIMAT0019711	0	0	0	0	0	0.597354	0	0	0	0	0	0	0	0	0	0	0	0	0	0	0	0	0	0	0.371007	0	0	0	0	0	0	0.450727	0.216499	0	0	0	0	0	0	0	0	0	0	0	0	0	0	0
hsa-miR-4649-3p	MIMAT0019712	0	0	0.593017	0	0.834241	0.597354	0	0	0	0.698016	0	0	0.228284	0	0	0	0	0.679854	0	0.51898	0	0.265188	0	0.210761	0.371007	0.366858	0.142645	0	0	0.302735	0	0.450727	0	0	0	0	0	0	0.543528	0	0	0.270645	0	0	0.480536	0	0.740585	0.240576
hsa-miR-4650-5p	MIMAT0019713	0	0	0	0	0	0	0	0	0	0	0	0	0	0	0	0	0	0	0	0	0	0	0	0	0	0	0	0	0	0	0	0	0	0	0	0	0	0	0	0	0	0	0	0	0	0	0	0
hsa-miR-4651	MIMAT0019715	0	0	0	0	0	0	0	0	0	0	0	0	0	0	0	0	0	0	0	0	0	0	0	0.210761	0	0.183429	0	0	0	0	0	0	0	0	0	0	0	0	0	0	0	0.270645	0	0	0	0.35115	0	0
hsa-miR-4652-5p	MIMAT0019716	13.2664	4.87571	1.77905	3.83864	1.3904	8.36296	4.2352	8.75477	7.16787	0	5.15296	1.76336	3.19598	1.04923	4.22106	8.38372	16.8052	11.5575	8.66149	2.85439	4.04475	7.69047	4.87864	8.6412	0.185504	16.3252	6.13375	4.79926	6.24224	2.42188	9.65741	3.60581	13.8559	11.629	15.3848	0	1.62616	22.6232	1.63058	4.36798	1.34005	7.03678	9.78264	27.1496	16.8188	0	10.1213	2.16519
hsa-miR-4652-3p	MIMAT0019717	0	0	0	0	0	0.597354	0.5294	0.62534	0	0	0	0	0	0	0.527632	0.72902	1.15898	1.35971	0	0	0	0	0	0	0	0.550287	0.285291	0.111611	0.445874	0	0	0	0.216499	0	0	0	0	1.02833	0.543528	0	0	0.54129	0	0.393472	0	0	0.246862	0
hsa-miR-4653-5p	MIMAT0019718	0	0	0	0	0	0	0	0	0	0	0	0.352673	0	0	0	0	0	0	0	0	0	0	0	0	0	0	0	0	0	0	0	0	0	0	0	0	0	0	0	0	0	0	0	0	0	0	0	0
hsa-miR-4653-3p	MIMAT0019719	0	0	0.593017	0.225802	0	0	0	0	0	0	0	0	0	0	0	0	0.579489	0	0	0	0	0	0	0	0.185504	0	0	0	0	0.302735	0	0	0	0	0	0	0	0	0	0.155999	0	0	0	0	0	0	0.246862	0
hsa-miR-4654	MIMAT0019720	0	0	0	0.225802	0	0	0	0	0	0	0	0	0	0	0	0	0	0	0	0	0	0	0.304915	0	0	0	0.142645	0	0	0	0	0.450727	0	0	0	0	0	0.514163	0	0.155999	0.446683	0	0	0	0.480536	0	0	0
hsa-miR-4655-5p	MIMAT0019721	0	0	0	0	0	0	0	0	0	0	0	0	0	0	0	0	0	0	0	0	0	0	0	0	0	0	0	0	0	0	0	0	0	0	0	0	0	0	0	0	0	0	0	0	0	0	0	0
hsa-miR-4655-3p	MIMAT0019722	0	0	0	0	0	0	0	0	0	0	0	0	0	0	0	0	0	0	0	0	0	0	0.304915	0	0	0	0	0	0	0	0	0	0	0	0	0	0	0	0	0	0	0	0	0	0	0	0	0
hsa-miR-4656	MIMAT0019723	0	0	0	0	0	0	0	0	0	0	0	0	0	0	0	0	0	0	0	0	0	0	0	0	0	0	0	0	0	0	0	0	0	0	0	0	0	0	0	0	0	0	0	0	0	0	0	0
hsa-miR-4657	MIMAT0019724	0.737021	0	0	0.225802	0	0	0	0	0.79643	0	0	0	0	0	0	0	0	0	0	0.25949	0	0	0	0	0.185504	0	0	0.111611	0	0	1.15889	0	0	0.219416	0.569809	2.00644	0	0	0	0	0	0	0	0	0.480536	0.35115	0.246862	0
hsa-miR-4658	MIMAT0019725	0.737021	0	0	0	0	0	0.5294	0	0	0	0.286276	0	0.228284	0	0	0	0	0	0	0	0	0	0	0	0.371007	0.733716	0.285291	0.111611	0	0	0.772592	0.901453	0	0.658247	0	0.668813	0	0	0	0	0	0	0	0	0	0	0	0.240576
hsa-miR-4659a-5p	MIMAT0019726	0	0	0	0	0	0	0	0	0	0	0	0.352673	0	0	0	0	0	0	0	0	0	0	0	0	0.185504	0	0.142645	0	0	0	0	0	1.29899	0	0	0.668813	0	0	0.543528	0.155999	0	0	0	0	0	0	0	0.240576
hsa-miR-4659a-3p	MIMAT0019727	0	0	0	0	0	0	0	0	0	0.349008	0	0	0	0	0	0	0	0	0	0	0	0.132594	0	0	0	0	0	0	0	0	0	0	0	0	0	0	0	0	0	0	0	0	0	0.262315	0	0	0	0
hsa-miR-4660	MIMAT0019728	0	1.62524	0	0	0.27808	0	2.1176	0	0	0.349008	0.572552	0.352673	0.228284	0	1.05526	0	0	1.35971	1.23736	0.51898	0	0.397783	0	0.210761	0.927519	0	0.570581	0	0.445874	0	1.15889	1.80291	0.865996	1.75533	0	0	1.62616	1.02833	0.543528	0.155999	0.446683	0.54129	0	0.655786	0	0	0.493724	0
hsa-miR-4661-5p	MIMAT0019729	2.94808	1.62524	4.15112	4.29024	6.11777	21.5048	7.941	11.8815	5.57501	5.58413	3.43531	0.352673	2.51112	37.7721	3.69342	10.9353	13.9077	0.679854	12.3736	4.67082	12.7121	4.90599	4.26881	4.21522	3.52457	0.733716	2.28233	3.57154	18.7267	1.51368	14.6793	4.95799	15.1549	2.41357	2.84904	4.68169	19.514	41.133	3.80469	2.96399	4.46683	11.0965	0	13.1157	8.16912	1.05345	7.65271	13.7128
hsa-miR-4661-3p	MIMAT0019730	0	0	0	0	0	0	0	0	0	0	0	0	0	0	0	0	0	0	0	0	0	0	0	0	0	0	0	0	0	0	0	0	0	0.219416	0	0	0	0	0	0	0	0	0	0	0	0	0	0
hsa-miR-4662a-5p	MIMAT0019731	27.2698	33.0465	10.0813	29.3543	43.1025	116.484	17.4702	38.7711	25.4858	42.579	30.6315	6.70078	19.4041	67.1504	18.9948	7.29019	54.472	72.7444	28.4592	8.04418	54.893	8.22084	11.2819	12.8564	15.3968	271.475	12.5528	2.90188	79.8115	18.1641	8.11222	52.2843	9.09296	10.7514	133.905	5.3505	31.7102	3.08498	10.327	12.324	19.2074	22.7342	104.348	8.65638	33.157	30.1989	20.2427	35.6053
hsa-miR-4662a-3p	MIMAT0019732	0	0	0	0	0	0	0	0	0	0	0	0	0	0	0	0	0	0	0	0	0	0	0	0	0	0.183429	0	0	0	0	0	0	0	0	0	0	0	0	0	0	0	0	0	0	0	0	0	0
hsa-miR-4659b-5p	MIMAT0019733	0	0	0	0	0	0	0	0	0	0	0	0	0	0	0	0	0	0	0	0	0	0	0	0	0	0	0	0	0	0	0	0	0	0	0	0	0	0	0	0	0	0	0	0	0	0	0	0
hsa-miR-4659b-3p	MIMAT0019734	0	0	0	0	0	0	0	0	0	0	0	0	0	0	0	0	0	0	0	0	0	0	0	0	0	0	0	0	0	0	0	0	0	0	0	0	0	0	0	0	0	0	0	0	0	0	0	0
hsa-miR-4663	MIMAT0019735	0	0	0	0	0	0	0	0	0	0	0	0	0	0	0	0	0	0	0	0	0	0	0	0	0	0	0	0	0	0	0	0	0	0	0	0	0	0	0	0	0	0	0	0	0	0	0	0
hsa-miR-4662b	MIMAT0019736	0	0	0	0	0	0.597354	0	0	0	0	0	0	0	0	0	0	0	0	0	0	0	0	0	0	0	0	0	0	0	0	0	0	0	0	0	0	0	0	0	0	0	0	0	0	0	0	0	0
hsa-miR-4664-5p	MIMAT0019737	0	0.541746	0	0.677406	0	0.597354	0	0	0.79643	0	0	0.352673	0.456568	0	0.527632	0	0	0.679854	0	0	0.577821	0.530377	0	0.210761	1.29852	0.550287	0.285291	0.111611	0	0	0	0	0	0	0	0.668813	0	0	0.543528	0.311999	0	0.270645	0	1.04926	0.480536	0.702301	0.493724	0.481152
hsa-miR-4664-3p	MIMAT0019738	0	0.541746	0.593017	1.80642	0	0.597354	1.0588	0.62534	0.79643	1.04702	0.858828	0.705346	0.913136	1.04923	0	1.09353	2.31796	0.679854	3.71207	1.03796	3.46693	2.2541	0.60983	0.632283	2.41155	0.733716	0.713226	1.11611	1.7835	0	1.15889	0	1.29899	0.658247	0	0	0	0.514163	0.543528	0.467998	0.446683	0.54129	0	2.7543	2.40268	0.35115	0.493724	0.481152
hsa-miR-4665-5p	MIMAT0019739	0	0	0.593017	0.225802	0.27808	0	0.5294	0.62534	0	0	0.286276	0.352673	0.456568	4.1969	0	5.46765	0	2.03956	13.6109	1.55694	1.15564	0.265188	0.60983	0.843044	0.185504	0.366858	0	0	0	0	0.772593	0	0.432998	0	0	0	0	0	0.543528	0.155999	0.446683	2.16516	0	0.918101	0.961072	0.35115	0.987447	0.240576
hsa-miR-4666a-5p	MIMAT0019741	0	0	0	0.225802	0	0	0	0	0.79643	0	0	0	0	0	0	0	0	0	0	0	0	0.265188	0	0.421522	0	0.183429	0.142645	0	0.445874	0	0.386296	0	0	0	0	0	0	0	0	0.155999	0	0	0	0.262315	0	0	0	0.240576
hsa-miR-4666a-3p	MIMAT0019742	0	0	0	0	0	0	0	0	0	0	0	0	0	0	0	0	0	0	0	0	0	0	0	0	0	0	0	0	0	0	0	0	0	0	0	0	0	0	0	0	0	0	0	0	0	0	0	0
hsa-miR-4667-5p	MIMAT0019743	0	0	0	0	0.27808	0	0	0	0	0.349008	0	0	0.228284	0	0	0	0	0.679854	0	0.25949	0	0.132594	0	0.632283	0	0	0	0	0.445874	0	0	0	0.216499	0	0	0	0	0	0	0	0	0	0	0	0	0	0	0
hsa-miR-4667-3p	MIMAT0019744	0	0	0	0.225802	0	0	0	0	0	0	0	0	0	0	0	0	0	0	0	0	0	0	0	0	0.185504	0	0	0.111611	0	0	0	0	0	0	0	0	0	0	0	0.155999	0	0	0	0	0	0	0	0
hsa-miR-4668-5p	MIMAT0019745	0	0	0	0	0	0	0	0	0	0	0	0	0	0	0	0	0	0	0	0	0	0	0	0	0	0	0	0	0	0	0	0	0	0	0	0	0	0	0	0	0	0	0	0	0	0	0	0
hsa-miR-4668-3p	MIMAT0019746	4.42212	7.58444	13.0464	5.41925	10.8451	7.16825	4.2352	9.38011	10.3536	8.37619	3.72159	4.23207	3.19598	8.3938	2.63816	14.5804	8.69234	9.51796	14.8483	4.93031	7.51168	0	3.04915	3.7937	3.33906	3.11829	0.998517	2.56704	5.35049	5.1465	0.386296	9.01453	1.29899	0.877663	1.70943	6.68813	8.9439	1.54249	4.89175	1.56	7.59361	10.2845	3.91305	0.786943	0	0.35115	1.48117	1.68403
hsa-miR-219b-5p	MIMAT0019747	1.47404	0	0	0	0.27808	0	0	0	0	0.349008	0.572552	0	0	0	0	0.36451	0	0.679854	2.47471	0	0	0.265188	0	0.210761	0.185504	0.183429	0.142645	0.111611	0	0.302735	0.386296	0	0	0.658247	0	0	0	0	0	0	0.446683	1.35323	0	0	0.480536	0.7023	0	0
hsa-miR-219b-3p	MIMAT0019748	0	0.541746	0	0.225802	0.834241	0	0.5294	0	0.79643	0.698016	0	0.352673	0.456568	0	0	0.72902	0.579489	0	0	0	0	0.530377	0.60983	1.26457	0.371008	0.366858	0	0.558053	0	0	0	0	1.29899	0.438832	0	0.668813	0	0.514163	1.63058	0	0	1.35323	0	0.262314	0	0	0.246862	0
hsa-miR-4669	MIMAT0019749	0	0	0	0.225802	0	0	0	0	0	0	0	0	0	0	0	0.36451	0	0	0	0	0	0	0	0.210761	0.371007	0	0	0	0	0	0	0	0	0	0.569809	0	0	0	0	0.155999	0	0	0	0	0	0.35115	0	0
hsa-miR-4670-5p	MIMAT0019750	0	0	0	0.451604	0	0	0	0	0	0	0	0	0	0	0	0	0	0	0	0	0	0	0	0	0	0	0	0	0	0	0	0	0	0	0	0	0	0	0	0	0	0	0	0	0	0	0	0
hsa-miR-4670-3p	MIMAT0019751	0	0	0	0	0	0	0	0	0	0	0	0	0	0	0	0	0	0	0	0	0	0	0	0	0.185504	0	0	0	0	0	0	0	0	0	0	0	0	0	0	0	0	0.270645	0	0	0	0	0	0
hsa-miR-4671-5p	MIMAT0019752	0	0	0	0	0	0	0	0	0	0	0	0	0	0	0	0	0	0	0	0	0	0	0	0	0	0	0	0	0	0	0	0	0	0	0	0	0	0	0	0	0	0	0	0	0	0	0	0
hsa-miR-4671-3p	MIMAT0019753	0	0	0	0	0	0	0	0	0	0	0	0	0	0	0	0	0	0	0	0	0	0	0	0	0	0.550287	0	0	0	0	0	0	0	0	0	0	0	0	0	0	0	0	0	0	0	0	0	0
hsa-miR-4672	MIMAT0019754	0	0	0	0	0	0	0	0	0	0	0	0	0	0	0	0	0	0	0	0	0	0	0	0	0	0	0	0	0	0	0	0	0	0	0	0	0	0	0	0	0	0	0	0	0	0	0	0
hsa-miR-4673	MIMAT0019755	0	0	0	0	0	0	0	0	0	0	0	0.352673	0.228284	0	0	0	0	0	0	0	0	0.132594	0	0	0	0.183429	0	0.111611	0	0	0	0	0.216499	0	0	0	0	0	0	0	0	0	0	0	0	0	0	0
hsa-miR-4674	MIMAT0019756	0	0	0.593017	0.903208	0.27808	0	0	0	0	0	0	0	0.456568	0	0	0	0	0	0	0.51898	0	0.530376	0	0.210761	0.371008	0.183429	0.142645	0	0.445874	0	0	0	0.432998	0.219416	0	0	0	0	0	0.779997	0	0	0	0	0	0.702301	0.740586	0.240576
hsa-miR-4675	MIMAT0019757	0	0	0	0	0	0	0	0	0	0	0	0	0	0	0	0	0	0	0	0	0	0	0	0	0	0	0.142645	0	0	0	0	0	0	0	0	0	0	0	0	0	0	0	0	0	0	0	0	0
hsa-miR-4676-5p	MIMAT0019758	1.47404	0.541746	0.593017	0	0.27808	0	0.5294	0.62534	0	0	2.00393	0.352673	0.913136	0	0	0	0	0	3.71207	0.51898	0.577821	0.265188	0.60983	0.632283	0.371007	0.366858	0.713227	0.446443	0	0.605471	0.386296	0	0.865996	0.219416	2.27923	1.33763	0	0	0.543528	0.779997	0.893366	0.270645	0	0	0.480536	1.4046	0.493724	0.481152
hsa-miR-4676-3p	MIMAT0019759	0	0	0	0	0.27808	0	0	0	0	0	0.286276	0	0.228284	0	0	0	0	0	1.23736	0	0	0	0	0.421522	0	0	0.142645	0	0	0.605471	0	0	0.216499	0	0	0	0	0	0	0	0	0	0	0	0	0	0	0
hsa-miR-4677-5p	MIMAT0019760	2.21106	0.541746	0.593017	0	0.834241	0	0.5294	1.87602	0	0.698016	0	0	0.456568	2.09845	0	0.36451	0	0.679854	2.47471	0.77847	0	0.397782	0.304915	0	0.185504	0.366858	1.14116	0.223222	1.7835	0	0.772592	0	0.649497	0.877662	1.13962	1.33763	1.62616	0.514163	0.543528	0.155999	0	0.270645	1.95653	0.524629	0	0.35115	0.493724	0.240576
hsa-miR-4677-3p	MIMAT0019761	5.15914	7.58444	6.52318	11.7417	15.2944	13.7392	3.7058	8.75477	11.9465	8.02718	10.5922	2.11604	9.13136	15.7384	15.3013	21.1416	11.0103	13.5971	30.9339	26.468	9.82296	10.3423	10.3671	11.3811	7.60564	6.78687	12.4101	5.13409	7.57986	7.87112	7.72593	15.7754	6.27847	12.7261	11.3962	16.7203	11.3831	17.9957	7.06586	7.64397	16.5273	10.8258	12.3913	3.93472	9.61073	5.96956	16.5397	8.17959
hsa-miR-4678	MIMAT0019762	0.737021	0	0	0	0	0	0	0	0	0	0	0	0	0	0	0	0	0	0	0	0.577821	0	0	0	0	0	0	0	0	0	0	0	0	0	0	0	0	0	0	0	0	0	0	0	0	0.35115	0	0
hsa-miR-4679	MIMAT0019763	0	0	0	0	0	0	0	0	0	0	0	0	0	0	0	0	0	0	0	0.25949	0	0	0	0	0	0	0	0	0	0	0	0	0	0	0	0	0	0	0	0	0	0	0	0	0	0	0	0.240576
hsa-miR-4680-5p	MIMAT0019764	0	0	0	0	0	0	0.5294	0	0	0	0.286276	0.352673	0.228284	0	0	0	0	0.679854	0	0	0	0	0	0	0	0	0.142645	0	0.445874	0.302735	0	0.450727	0	0	0	0.668813	0	0	0	0	0.446683	0.270645	0	0	0	0	0	0
hsa-miR-4680-3p	MIMAT0019765	0	0	0	0	0	0	0	0	0	0	0	0	0.228284	0	0	0	0	0	0	0	0	0	0	0	0	0	0	0	0	0	0	0	0	0.219416	0	0	0	0	0	0	0	0	0	0	0	0	0	0
hsa-miR-4681	MIMAT0019766	0	0	0	0	0	0	0	0	0	0	0	0	0	0	0	0	0	0	0	0	0	0	0	0	0	0	0	0	0	0	0	0	0	0	0	0	0	0	0	0	0	0	0	0	0	0	0	0
hsa-miR-4682	MIMAT0019767	0	0	0	0	0	0	0	0	0	0	0.286276	0	0	0	0.527632	0	0	0	0	0	0	0	0	0	0	0	0	0	0	0	0	0	0	0	0	0.668813	0	0	0	0	0	0.270645	0	0	0	0	0	0
hsa-miR-4683	MIMAT0019768	0	0	0	0.225802	0.556161	0	0	0	0	0	0.286276	0	0	0	0	0	1.73847	0	0	1.03796	0.577821	0	0	0	0.185504	0	0.142645	0.446442	0	0.60547	0	0	0	0.219416	0	0	0	0	0	0	0.446683	0.270645	0.652176	0.262315	0	0	0	0
hsa-miR-4684-5p	MIMAT0019769	0.737021	0	0	0	0	0	0	0	0	0	0	0	0	0	0	0	0	0	0	0	0	0	0	0	0.371008	0	0	0	0	0	0	0.450727	0	0	1.13962	0	0	0	0	0	0	0	0	0.131157	0	0	0	0
hsa-miR-4684-3p	MIMAT0019770	0	0	0	0	0	0	0	0	0	0	0	0	0	0	0.527632	0	0	0	0	0	0	0	0.60983	0	0	0.183429	0	0	0	0	0	0	0	0	0	0	0	0	0.543528	0	0	0	0	0.131157	0.480536	0	0	0
hsa-miR-4685-5p	MIMAT0019771	0	0	0	0	0	0	0	0	0	0	0	0	0	0	0	0	0	0	0	0	0	0	0	0	0	0.183429	0	0	0	0	0	0	0	0	0	0	0	0	0	0	0	0	0	0.131157	0	0	0	0
hsa-miR-4685-3p	MIMAT0019772	0	0.541746	0.593017	0.677406	0	0.597354	0	0.62534	0	0.349008	0.572552	0	0.684852	0	0	0.36451	2.89744	0	1.23736	0.25949	0.577821	0.265188	0	0.210761	0.556511	0.550287	0	0.111611	0.445874	0	0.386296	0.450727	0.216499	0.658247	0	0	0	0	0	0.467998	0	0.270645	0	0.131157	0	0.35115	0	0.721728
hsa-miR-4686	MIMAT0019773	0	0	0	0	0	0	0	0	0	0	0	0	0	0	0	0	0	0	0	0	0	0	0	0	0	0	0	0	0	0	0	0	0.432998	0	0	0	0	0	0	0	0	0	0	0	0	0	0	0
hsa-miR-4687-5p	MIMAT0019774	0	0	0	0	0	0	0	0	0	0	0.286276	0	0	0	0	0	0	0	0	0	0	0	0	0	0.185504	0	0	0.111611	0	0	0	0	0	0	0	0	0	0	0	0	0	0	0	0.131157	0	0	0	0
hsa-miR-4687-3p	MIMAT0019775	0	0	0	0	0	0	0	0	1.59286	0	0	0	0.228284	0	0	0	0	0	0	0	0	0	0.304915	0.421522	0	0	0.142645	0.111611	0	0	0.386296	0	0.865996	0.877663	0	0	0	0	0	0	0	0	0	0	0.480536	0.7023	0	0
hsa-miR-1343-5p	MIMAT0027038	0	0	0	0	0	0	0	0	0	0	0	0	0	0	0	0.36451	0	0	0	0	0	0	0	0	0	0	0	0	0	0	0	0	0	0	0	0	0	0	0	0	0	0	0	0	0	0	0	0
hsa-miR-1343-3p	MIMAT0019776	0	0	0.593017	1.58062	0.834241	4.18148	0	0.62534	0	0	1.71766	0	0.456568	0	1.05526	0	2.89744	3.39927	3.71207	1.81643	4.04475	1.72372	1.52458	3.37218	1.29852	3.30172	1.85439	0.781275	1.33762	0	0.386296	0	3.89698	1.31649	0	0	0	0.514163	0	0.623996	0	0.54129	0.652176	1.31157	4.80536	0	4.69037	1.92461
hsa-miR-4688	MIMAT0019777	0	0	0	0	0	0	0	0	0	0	0	0	0	0	0	0	0	0	0	0	0	0	0	0.210761	0	0	0	0	0	0	0	0	0	0	0	0	0	0	0	0.155999	0	0	0	0	0	0	0	0
hsa-miR-4689	MIMAT0019778	0	0.541746	0	0.225802	0	0	0	0	0	0	0	0	0	0	0	0	0	0	0	0	0	0	0	0	0	0	0.142645	0	0	0	0	0	0.216499	0	0	0	0	0	0	0.155999	0	0	0	0	0	0	0	0
hsa-miR-4690-5p	MIMAT0019779	0	0	0	0	0	0	0.5294	0	0	0	0	0	0.228284	0	0	0	0	0	0	0	0	0	0	0	0	0	0.142645	0	0	0	0	0	0	0	0	0	0	0	0	0.155999	0	0	0	0.131157	0	0	0.246862	0
hsa-miR-4690-3p	MIMAT0019780	0	0	0	0	0.27808	0	0	0	0	0	0	0.352673	0.228284	0	0	0	0	0	0	0	0.577821	0.132594	0	0	0	0	0	0.111611	0	0	0	0	0.216499	0	0	0	0	0	0	0	0	0	0	0	0	0	0	0
hsa-miR-4691-5p	MIMAT0019781	0	0	0	0	0	0	0	0	0	0	0	0	0	0	0	0	0	0	0	0	0	0	0	0	0	0	0	0	0	0	0	0	0	0	0	0	0	0	0	0	0	0	0	0	0	0	0	0
hsa-miR-4691-3p	MIMAT0019782	0	0	0	0.451604	0	0	0	0	0	0	0	0	0	1.04923	0	0.729019	0	0	0	0	0	0.397782	0	0.210761	0.556511	0	0.427935	0	0	0	0	0	0.216499	0.438832	0	0	0	0	0	0	0.893366	0	0	0.262315	0.480536	0	0.493724	0.240576
hsa-miR-4693-3p	MIMAT0019785	0	0	0	0	0	0	0	0	0	0	0	0	0	0	0	0	0	0	0	0	0	0	0	0	0	0	0	0	0	0	0	0	0	0	0	0	0	0	0	0	0	0	0	0	0	0	0	0
hsa-miR-4694-5p	MIMAT0019786	0	0	0	0	0	0	0	0	0	0	0	0	0	0	0	0	0	0	0	0	0	0	0	0	0	0	0	0	0	0	0	0	0	0	0	0	0	0	0	0	0	0	0	0	0	0	0	0
hsa-miR-4694-3p	MIMAT0019787	0	0	0	0	0	0	0	0	0	0	0	0	0	0	0	0	0	0	0	0	0	0	0	0	0	0	0	0	0	0	0	0	0	0	0	0	0	0	0	0	0	0	0	0	0	0	0	0
hsa-miR-4695-3p	MIMAT0019789	0	0	0	0	0	0	0	0	0	0	0	0	0	0	0	0	0	0	0	0	0	0	0	0	0	0	0	0	0	0	0	0	0	0.438831	0	0	0	0	0	0	0	0	0	0	0	0	0	0
hsa-miR-4697-3p	MIMAT0019792	0	0	0	0	0	0	0	0	0	0	0	0	0	0	0	0	0	0	0	0	0	0	0	0	0	0	0	0	0	0	0	0	0.432998	0	0	0	0	0	0	0	0	0	0	0.131157	0	0	0	0
hsa-miR-4698	MIMAT0019793	0	0	0	0	0	0	0	0	0	0	0	0	0	0	0	0	0	0	0	0	0	0	0	0	0	0	0	0	0	0	0	0	0	0	0	0	0	0	0	0.155999	0	0	0	0	0	0	0	0
hsa-miR-4699-5p	MIMAT0019794	0	0	0	0	0	0	0	0	0	0.349008	0	0	0	0	0	0	0	0	0	0	0	0	0	0	0	0	0	0	0	0	0	0	0	0	0	0	0.813082	0	0	0	0	0	0	0	0	0	0	0
hsa-miR-4699-3p	MIMAT0019795	0	0	0	0.225802	0.27808	0	0	0	0	0	0	0	0	0	0	0	0	0	1.23736	0	0	0.928159	0	0.421522	0.556511	0	0.142645	0	0	0	0	0	0.216499	0.219416	0	0	0	0	0	0	0	0.270645	0	0	0	0	0	0.240576
hsa-miR-4700-5p	MIMAT0019796	0	0	0	0	0	0	0	0	0	0	0	0	0	0	0	0.36451	0	0	0	0	0	0	0	0	0	0	0	0	0	0	0	0	0.216499	0	0	0	0	0	1.08706	0	0	0	0	0	0.480536	0	0	0
hsa-miR-4700-3p	MIMAT0019797	0	0	0	0	0	0	0	0	0	0	0	0	0	0	0	0	0	0	0	0	0	0	0	0	0	0	0	0	0	0	0	0	0	0	0	0.668813	0	0	0	0	0	0	0	0	0	0	0	0
hsa-miR-4701-5p	MIMAT0019798	0	0	0	0	0	0	0	0	0	0	0	0	0	0	0	0	0	0	0	0	0	0	0	0	0.371007	0	0	0	0	0	0	0	0	0	0	0	0	0	0	0	0	0	0	0.262315	0	0	0	0
hsa-miR-4701-3p	MIMAT0019799	0	0	0	0	0	0	0	0	0	0	0	0	0	0	0	0	0	0	0	0	0	0	0	0	0	0	0	0	0	0	0	0	0	0	0	0	0	0	0	0	0	0	0	0	0	0	0	0
hsa-miR-4703-5p	MIMAT0019801	0	0	0	0	0	0	0	0	0	0	0	0	0	0	0	0	0	0	0	0	0	0	0	0	0	0	0	0	0	0	0	0	0	0	0	0	0	0	0	0	0	0	0	0	0	0	0	0
hsa-miR-4703-3p	MIMAT0019802	0	0	0	0	0.55616	0	0	0	0	0	0	0	0	0	0	0	0	0	0	0	0	0	0	0.210761	0	0	0	0.111611	0	0	0	0	0	0	0	0	0	0	0	0	0	0	0	0	0	0	0	0
hsa-miR-4704-5p	MIMAT0019803	0	0	0	0	0	0	0	0	0	0	0	0	0	0	0	0	0	0	0	0	0	0	0	0	0	0	0	0	0	0	0	0	0	0	0	0	0	0	0	0	0	0	0	0	0	0	0	0
hsa-miR-4704-3p	MIMAT0019804	0	0	0	0	0	0	0	0	0	0	0	0	0	0	0	0	0	0	0	0	0	0	0	0	0	0	0	0	0	0	0	0	0	0	0	0	0	0	0	0	0	0	0	0	0	0	0	0
hsa-miR-4705	MIMAT0019805	0	0	0	0.225802	0.556161	0	0	0	0	0	0.286276	0	0	0	0	4.00961	0.579489	0	1.23736	0.25949	1.15564	0	0	1.47533	0	2.20115	0	0.111611	0	0	0	0.450727	0	0	0	0	0	0	0	0.155999	0.446683	0.54129	0	0	2.88322	0	0	0
hsa-miR-4706	MIMAT0019806	0	0	0	0	0	0	0	0	0	0	0	0	0	0	0	0	0	0	0	0	0	0	0	0	0	0	0	0	0	0	0	0	0	0	0	0	0	0	0	0	0	0	0	0	0	0	0	0
hsa-miR-4707-5p	MIMAT0019807	0	0	0	0	0	0.597354	0	0	0	0	0	0.352673	0	0	0	2.18706	0	0	6.18678	0.25949	1.15564	0.397782	0	0	0	0	0.570581	0.111611	0	0.302735	0	0	0.432998	0.658248	0	0.668813	0	0	0.543528	0.467997	0.446683	0	0	0	0.480536	0	0	0.240576
hsa-miR-4707-3p	MIMAT0019808	0	0	0	0	0	1.79206	0	0	0	0	0.286276	0	0.684852	0	0	1.82255	0	0	1.23736	0.25949	1.15564	0.132594	0.304915	0.210761	1.11302	0.183429	1.28381	0.111611	1.33762	0	0.386296	0	0.216499	0.438831	0	0.668813	0.813082	0	0.543528	0	0.893366	0.270645	0	0	0.480536	0	0	0
hsa-miR-4708-5p	MIMAT0019809	0	0	0	0	0	0	0	0	0	0.349008	0	0	0	0	0	0.36451	0	0	0	0	0	0	0	0	0	0	0	0	0	0	0	0	0.649497	0	0	0	0	0	0	0	0	0	0	0	0	0	0	0
hsa-miR-4708-3p	MIMAT0019810	0	0	0	0	0	0	0	0	0	0	0	0	0	0	0	0	0	0	0	0	0	0	0	0	0	0	0	0	0	0	0	0	0	0	0	0	0	0	0	0	0	0	0	0	0	0	0	0
hsa-miR-4709-5p	MIMAT0019811	0	0	0	0	0	0	0.5294	0	0	0	0	0	0.228284	0	0	0	0	0	0	0	0	0	0	0	0	0	0	0	0	0	0	0	0	0	0.569809	0	0	0	0	0	0	0	0	0	0	0	0	0
hsa-miR-4709-3p	MIMAT0019812	1.47404	0	3.5581	0.451604	2.7808	0	1.5882	0.62534	1.59286	3.49008	4.00786	0	2.73941	0	2.11053	1.09353	3.47693	0	1.23736	0.25949	0	0.265188	0	0.632283	1.29853	0.366858	0.570581	0.223222	0.445874	1.81641	0	0.901453	0	1.53591	0	0	0	0.514163	0	1.24799	0.893366	0	0	0.393472	1.92214	0.35115	0.493723	0.721728
hsa-miR-203b-5p	MIMAT0019813	0	0.541746	1.18603	0	0.55616	0	0	0	0	0	0	0	0	0	0	0.36451	0	0	0	0	0	0	0	0.210761	0.185504	0	0	0.111611	0	0	0	0	0	0	0.569809	0	0.813082	0	0	0	0	0.54129	0	0	0	0	0	0
hsa-miR-203b-3p	MIMAT0019814	204.892	354.302	609.621	334.639	74.2475	556.734	134.997	100.054	208.665	99.4672	81.8749	183.742	62.5498	356.737	54.3461	138.514	10.4308	628.185	133.634	49.3031	483.636	46.8058	64.9469	50.3719	222.79	126.749	46.7877	219.092	957.738	84.4631	120.911	161.36	699.509	98.737	1472.39	22.0708	100.009	92.5493	1986.05	51.7918	1769.31	254.677	30.6523	207.491	488.225	291.455	49.6192	25.2605
hsa-miR-4710	MIMAT0019815	0	0	0	0	0	0	0	0	0	0	0	0	0	0	0	0	0	0	0	0	0	0	0	0	0.185504	0	0	0	0.445874	0	0	0	0	0.219416	0	0	0	0	0	0.155999	0.446683	0	0	0.131157	0	0	0	0
hsa-miR-4711-5p	MIMAT0019816	0	0	0	0	0	0	0	0	0	0	0	0	0	0	0	0	0	0	0	0	0	0	0	0	0	0	0	0	0	0	0	0	0	0	0	0	0	0	0	0	0	0	0	0	0	0	0	0
hsa-miR-4711-3p	MIMAT0019817	0	0	0	0	0	0	0	0	0	0	0	0	0	0	0	0	0	0	0	0	0	0	0	0	0	0	0	0	0	0	0	0	0	0	0	0	0	0	0	0	0	0	0	0	0	0	0	0
hsa-miR-4712-5p	MIMAT0019818	0	0	0	0	0	0	0	0	0	0	0	0	0	0	0	0	0	0	0	0	0	0	0	0	0	0	0	0	0	0	0	0	0	0	0	0	0	0	0	0	0	0	0	0	0	0	0	0
hsa-miR-4712-3p	MIMAT0019819	0	0	0	0	0	0	0	0	0	0	0	0	0	0	0	0	0	0	0	0	0	0	0	0	0	0	0	0	0	0	0	0	0	0	0	0	0	0	0	0.155999	0	0	0	0	0	0	0	0
hsa-miR-4713-5p	MIMAT0019820	0	0	0.593017	0	0	0	0	0	0	0	0.858827	0.705346	0.228284	0	0.527632	1.09353	1.73847	1.35971	1.23736	0.25949	0	0.265188	0	0.632283	0.185504	0	0.142645	0	0.891748	0	0.386296	0	1.29899	1.53591	0.569809	0	0	0	0	0.311998	0	0.54129	0	0.786943	0.480536	0	1.48117	0.962304
hsa-miR-4713-3p	MIMAT0019821	0	0	0	0	0	0	0	0	0	0	0	0	0	0	0	0	0	0	0	0	0	0	0	0.210761	0	0.366858	0.142645	0	0	0	0.386296	1.35218	0.216499	0.658247	0	0	0	0	0	0	0	0	0	0.262315	0	0	0.246862	0
hsa-miR-4714-5p	MIMAT0019822	0	0.541746	0	0.451604	0.27808	0.597354	0	0.62534	0	0	0.286276	0	0	0	0	0	0.579489	0	3.71207	0.51898	0.577821	0.132594	0	0.632283	0.556512	0	0	0	0	0	0	0	0	0.438831	2.27923	0	0	0.514163	0	0	0	0.811936	0	0.262314	0	0	0.493724	0
hsa-miR-4714-3p	MIMAT0019823	0	0	0.593017	0	0	0	0.5294	0	0	0	0.286276	0	0	0	0.527632	0.36451	1.15898	0	0	0	0	0	0.304915	1.05381	0.185504	0.733716	0.570581	0	1.33762	0	0	0	0.216499	0.219416	0.569809	0	0.813082	0.514163	0	0	0	0.541291	0	0	0	0	0.740585	0.481152
hsa-miR-4715-5p	MIMAT0019824	0	0	0	0	0	0	0	0	0	0	0	0	0	0	0	0	0	0	0	0	0	0	0	0	0	0	0	0	0	0	0	0	0	0	0	0	0	0	0	0	0	0	0	0	0	0	0	0
hsa-miR-4715-3p	MIMAT0019825	0	0	0	0	0	0	0	0	0	0	0	0	0	0	0	0	0	0	0	0	0	0	0	0	0	0	0	0	0	0	0	0	0	0	0	0	0	0	0	0	0	0	0	0	0	0	0.246862	0
hsa-miR-4716-5p	MIMAT0019826	0	0	0	0	0	0	0	0	0	0	0	0	0	0	0	0	0	0	0	0	0	0	0	0	0	0	0	0	0	0	0	0	0	0	0	0	0	0	0	0	0	0	0	0	0	0	0	0
hsa-miR-4716-3p	MIMAT0019827	0	0	0	0	0	0	0	0	0	0	0	0	0	0	0	0	0	0	0	0	0	0	0	0	0	0	0	0.111611	0	0	0	0	0	0.219416	0	0	0	0	0	0	0	0.270645	0	0	0	0	0	0
hsa-miR-3529-5p	MIMAT0019828	0	0	0	0	0	0	0	0	0	0	0	0	0	0	0	0	0	0	0	0	0	0	0	0	0	0	0	0	0	0	0	0	0	0	0	0	0	0	0	0	0	0	0	0	0	0	0	0
hsa-miR-3529-3p	MIMAT0022741	0	0	0	0	0	0	0	0	0	0	0	0	0	0	0	0	0	0	0	0	0	0	0	0	0	0	0	0	0	0	0	0	0	0	0	0	0.813082	0	0	0	0	0	0	0	0	0	0	0
hsa-miR-4717-5p	MIMAT0019829	0	0	0	0	0	0	0	0	0	0	0	0	0	0	0	0	0	0	0	0	0	0	0	0	0	0	0	0	0	0	0	0	0	0	0	0	0	0	0	0	0	0	0	0	0	0	0	0.240576
hsa-miR-4717-3p	MIMAT0019830	0	0	0	0	0.27808	0	0.5294	0	0	0	0	0	0	0	0	0	0	0	0	0	0	0	0	0	0	0	0	0	0	0	0	0	0	0	0	0	0	0	0	0.155999	0	0	0	0	0	0	0.246862	0
hsa-miR-4718	MIMAT0019831	0	0	0	0	0	0	0	0	0	0	0	0	0	0	0	0	0	0	0	0	0	0	0	0	0	0	0	0	0	0.302735	0	0	0	0	0	0	0	0	0	0	0	0	0	0	0	0	0	0
hsa-miR-4719	MIMAT0019832	0	0	0	0	0	0	0	0	0	0	0	0	0	0	0	0	0	0	0	0	0	0	0	0	0	0.917145	0	0	0	0	0	0	0	0	0	0	0	0	0	0	0	0	0	0	0	0	0	0
hsa-miR-4720-5p	MIMAT0019833	0	0	0	0	0	0	0	0	0	0	0	0.352673	0	0	0	0	0	0	0	0	0	0	0	0	0	0	0	0.111611	0	0	0	0	0	0	0	0	0	0	0	0	0	0	0	0	0	0.702301	0	0
hsa-miR-4720-3p	MIMAT0019834	0	0	0	0	0	0	0	0	0	0	0	0	0	0	0	0	0	0	0	0	0	0.132594	0	0	0	0	0	0	0	0	0	0	0	0	0	0	0	0	0	0	0	0	0	0	0	0	0	0
hsa-miR-4721	MIMAT0019835	0	0	0	0	0	0	0	0	0	0	0	0	0	0	0	0	0	0	0	0	0	0	0	0	0.185504	0	0	0	0	0	0	0	0	0	0	0	0	0	0	0	0	0	0	0	0	0	0	0
hsa-miR-4722-5p	MIMAT0019836	0	0	0	0	0	0	0	0	0	0	0	0	0	0	0	0	0	0	0	0	0	0	0	0	0	0	0	0	0	0	0	0	0	0	0	0	0	0	0	0	0	0.270645	0	0	0.480536	0	0	0
hsa-miR-4722-3p	MIMAT0019837	0	0	0	0	0	0	0	0	0	0	0	0	0	0	0	0	0	0	0	0	0	0	0	0	0.185504	0	0	0	0	0	0	0	0	0	0	0	0	0	0	0	0	0	0	0	0	0	0	0
hsa-miR-4520b-5p	MIMAT0020299	0	0	0	0.225802	0	0	0	0	0	0	0	0	0	0	0	0	0	0.679854	0	0	0	0	0	0	0	0	0	0	0	0	0	0	0	0	0	0	0	0	0	0	0	0	0	0	0	0	0	0
hsa-miR-4520b-3p	MIMAT0020300	0	0	0	0	0	0	0	0	0.79643	0	0	0	0	0	0	0	0	0	0	0	0	0	0	0	0	0	0	0	0	0	0	0	0	0	0	0	0	0	0	0	0	0	0	0	0	0	0	0
hsa-miR-4723-5p	MIMAT0019838	0	0	0	0	0	0	0	0	0	0	0	0	0	0	0	0	0	0	0	0	0	0	0	0	0	0	0	0.111611	0	0	0	0.450727	0	0	0	0	0	0	0	0	0	0	0	0	0	0	0	0
hsa-miR-4723-3p	MIMAT0019839	0	0	0	0.451604	0	0	0	0	0	0	0	0	0	0	0	0	0	0	0	0	0	0	0	0	0.371007	0	0	0	0	0	0.386296	0	0	0	0	0	0	0	0	0	0	0	0	0.393472	0	0	0	0
hsa-miR-451b	MIMAT0019840	0	0	0	0	0	0	0	0	0	0	0	0	0	0	0	0	0	0	0	0	0	0	0	0	0	0	0	0	0	0	0	0	0	0	0	0	0	0	0	0	0	0	0	0	0	0	0	0
hsa-miR-4724-5p	MIMAT0019841	0	0	1.18603	0.451604	0.27808	0	1.0588	0	0.79643	0.698016	0.286276	0	0	1.04923	0	0	0.579489	0	1.23736	1.29745	0	0.265188	0	0.210761	0.371007	0.550287	0.142645	0.446444	0	0.302735	1.93148	0.450727	0	1.53591	1.13962	5.3505	0.813082	0.514163	0.543528	0.155999	0	0.811936	0	0	0	0.7023	0	0.240576
hsa-miR-4724-3p	MIMAT0019842	0	0	0	0	0	0	0	0	0	0	0	0	0	0	0	0	0	0	0	0	0	0	0	0	0	0	0	0.111611	0	0	0	0	0	0	0	0.668813	0	0	0	0	0	0	0	0	0	0	0	0
hsa-miR-4725-5p	MIMAT0019843	0	0	0	0	0	0	0	0	0	0	0.286276	0	0	0	0.527632	0.36451	0	0	0	0	0	0	0.304915	0	0	0	0	0	0	0	0	0	0	0.219416	0	0	0	0	0	0	0	0	0	0	0	0	0	0
hsa-miR-4725-3p	MIMAT0019844	0	0	0	0	0	0	0	0	0	0	0	0	0	0	0	0	0	0	0	0	0	0.132594	0	0	0.371008	0	0	0.111611	0	0	0	0	0	0	0	0	0	0	0	0	0	0	0.652176	0	0	0	0.246862	0
hsa-miR-4726-5p	MIMAT0019845	0	0	0	0.225802	0.27808	0	0	0	0	0	0.286276	0	0.228284	0	0	0	0	0	0	0	0.577821	0.530376	0	0.421522	0	0	0	0.334832	1.33762	0	2.31778	0	1.94849	0.658247	0	0	0	0.514163	0.543528	0.155999	0	0	0	0.9181	0	0	0.246862	0.240576
hsa-miR-4726-3p	MIMAT0019846	0	0	0	0	0	0	0	0	0	0	0	0	0	0	0	0	0	0	0	0	0	0.265188	0	0	0	0	0	0	0	0.302735	0	0	0	0	0	0	0	0	0	0	0	0	0	0	0	0	0	0
hsa-miR-4727-5p	MIMAT0019847	0	0	0	0.225802	0	0	0	0	0.79643	0	0.572552	0	0.456568	0	0	0.36451	0	0	0	0	0	0.265188	0.60983	0	0.371007	0.183429	0	0	0	0.302735	0	0	0	0	0	0	0	0	0	0	0	0	0	0.524629	0	0	0	0
hsa-miR-4727-3p	MIMAT0019848	0	0	0	0	0	0	0	0	0	0	0	0	0	0	0	0	0	0	0	0	0	0	0.304915	0	0	0	0	0	0	0	0	0	0	0	0	0	0	0	0	0	0	0	0	0	0	0	0	0
hsa-miR-4728-5p	MIMAT0019849	0	0.541746	0	0	0	0	0	0	0	0	0	0	0	0	0	0	0	0	0	0	0	0	0.304915	0	0	0	0.28529	0.111611	0	0	0	0	0	0	0	0	0	0	0	0	0	0	0	0	0	0	0	0
hsa-miR-4728-3p	MIMAT0019850	0.737021	0	0	1.12901	1.66848	0.597354	5.8234	0	0	0.698016	2.00393	0.352673	1.59799	0	0.527632	0.729019	0	0	0	2.07592	1.15564	0.795564	0	0.843044	1.85504	0.366858	0.142645	0.446443	4.90462	0.908206	0.386296	0	0.865996	1.97474	0	2.67525	2.43925	0.514163	0.543528	1.092	0.893366	0	0	1.18041	0	0.35115	0	0.481152
hsa-miR-4729	MIMAT0019851	0	0	0	0	0	0	0	0	0.79643	0	0	0	0	0	0	0	0	0	0	0	0	0	0	0	0	0	0	0	0	0	0	0	0	0	0	0.668813	0	0	0	0	0	0	0	0	0	0	0	0
hsa-miR-4730	MIMAT0019852	0	0	0	0	0	0	0	0	0	0	0	0	0	0	0	0	0	0	0	0	0	0	0	0	0	0	0	0	0	0	0	0	0	0	0	0	0	0	0	0	0	0	0	0	0	0	0	0
hsa-miR-4731-5p	MIMAT0019853	0	0	0	0	0	0.597354	0	0	0	0	0	0	0	0	0	0	0	0	0	0	0	0	0.304915	0	0	0	0	0	0	0	0	0	0	0	0	0	0	0	0	0	0	0	0	0	0	0	0	0
hsa-miR-4731-3p	MIMAT0019854	0	0	0	0	0	0	0	0	0	0	0	0	0	0	0	0	0	0	0	0	0	0	0	0	0	0.183429	0	0	0	0	0	0.450727	0	0	0	0	0	0	0	0	0	0	0	0	0	0	0	0
hsa-miR-4732-5p	MIMAT0019855	0	0	0	0.225802	0	0	0	0	0	0	0	0	0	0	0	0	0	0	0	0	0	0	0	0	0	0.366858	0.142645	0	0.445874	0	0	0	0	0	0	0	0	0	0	0	0	0	0	0.262315	0	0	0	0.240576
hsa-miR-4732-3p	MIMAT0019856	0	0	0.593017	0	1.3904	0.597354	0.5294	0	0	0	0	0	0	0	0	0	0	0.679854	0	0	0	0	0.304915	1.89685	0.185504	0	0.142645	0.334832	2.22937	0	0	0	0.216499	0	0	0	0	0	0	0.155999	0	0.270645	0	0.655786	0	0.35115	0	0
hsa-miR-4733-5p	MIMAT0019857	0	0	0	0	0	0	0.5294	0	0	0	0	0	0.228284	0	0	0	0	0	0	0.25949	0	0.132594	0.304915	0	0.371007	0	0.142645	0.111611	0	0	0	0	0.216499	0.438832	0	0	0	0	0	0	0	0	0	0	0	0	0	0.240576
hsa-miR-4733-3p	MIMAT0019858	0	0	0	0	0.27808	0	0	0	0	0	0	0	0.228284	0	0.527632	0	0	0	0	0	0	0	0	0	0.371008	0.366858	0.142645	0.111611	0	0	0.386296	0	0	0	0	0	0	0	0	0.155999	0	0.270645	0	0.131157	0	0	0	0
hsa-miR-4734	MIMAT0019859	0	0	0	0	0	0	0	0	0.79643	0	0	0	0	0	0	0	0	0	0	0	0	0	0	0	0	0	0	0	0	0	0.386296	0	0.216499	0	0	0	0	0	0	0	0	0	0	0	0	0	0.246862	0
hsa-miR-4735-5p	MIMAT0019860	0	0	0	0	0	0	0	0	0	0	0	0.352673	0	0	0	0	0	0	0	0	0	0	0	0	0	0	0	0	0	0	0	0	0	0	0.569809	0	0	0	1.08706	0	0.446683	0.541291	0	0	0	0	0	0
hsa-miR-4736	MIMAT0019862	0	0	0	0.225802	0.27808	0	0	0	0.79643	0	0	0.352673	0	0	0	0	0	0	0	0.25949	0	0	0	0	0	0	0.142645	0.334832	0	0	0	0.450727	0	0	0	0	0	0	0	0.779997	0	0.270645	0	0	0	0	0	0.962304
hsa-miR-4737	MIMAT0019863	0	0	0	0	0	0	0	0	0	0	0	0	0	0	0	0	0	0	0	0	0	0	0	0	0	0	0	0	0	0	0	0	0	0	0	0	0	0	0	0	0	0	0	0	0	0	0	0
hsa-miR-3064-5p	MIMAT0019864	0	0	0	0	0	0	0	0	0	0.349008	0	0.352673	0.228284	0	0	0	0	0	0	0.51898	0	0.132594	0.304915	0.210761	0.371008	0.366858	0.142645	0.111611	0	0	0.772592	0	0	0	0	1.33763	0	0	0	0	0.446683	0.270645	0	0.131157	0	0	0	0
hsa-miR-3064-3p	MIMAT0019865	0.737021	0	0	0	0	0	0	0	0	0	0.858828	0.352673	0.228284	0	0	0	0	0.679854	0	0	0	0.132594	0.304915	0	0.742016	0	0	0	0	0	0	0.450727	0.216499	0.438831	0	0	0	0	0	0.623997	0	0	0	0	0	0.35115	0	0
hsa-miR-4738-5p	MIMAT0019866	0	0	0	0	0.27808	0	0	0	0	0	0	0	0	0	0	0	0	0	0	0	0	0	0	0	0	0	0.142645	0	0	0	0	0	0.216499	0	0	0	0.813082	0	0	0	0	0	0	0	0	0.35115	0	0
hsa-miR-4738-3p	MIMAT0019867	0	0	0.593017	0	0	0.597354	0	0.62534	0	0	0.286276	0	0.456568	0	0	0	0.579489	0.679854	0	0	0	0.265188	0	0	0	0.366858	0.28529	0.111611	0.445874	0	0.772593	0	0.432998	0.219416	0	0	0	0	0	0.311998	0	0	0.652176	0.131157	0	0	0.246862	0.721728
hsa-miR-4739	MIMAT0019868	0	0	0	0	0.27808	0	0	0	0	0	0	0	0	0	0	0	0	0	0	0	0	0	0.304915	0	0	0	0	0	0	0	0	0	0.216499	0	0	0	0	0	0	0	0	0	0	0	0	0	0	0
hsa-miR-4740-5p	MIMAT0019869	0	0	0.593017	0	0	0	0	0	0.79643	0	0.286276	0	0	0	0	0	0	0	0	0	0	0.132594	0	0.210761	0.371008	0.366858	0	0	0	0	0.386296	0.450727	0	0.219416	0	0	0	0	0	0	0	0	0	0	0	0	0	0.240576
hsa-miR-4741	MIMAT0019871	1.47404	0	0.593017	0.451604	0	0	0	0	0	0	0	0	0	0	0	0	0	0.679854	0	0.25949	0	0.928159	0	0.210761	0.556512	0	0	0.111611	0	0	0	0	0	0.658247	0	0	0	0	0	1.092	0	0	0	0.786944	0	0	0.493724	0.240576
hsa-miR-4742-5p	MIMAT0019872	0	0	0	0	0	0	0	0	0	0	0	0	0	0	0	0	0	0	0	0	0	0	0	0	0	0	0	0	0	0	0	0	0	0	0	0	0	0	0	0	0	0	0	0	0	0	0	0
hsa-miR-4742-3p	MIMAT0019873	0.737021	1.08349	0.593017	2.25802	1.66848	0	0.5294	1.87602	0.79643	1.04702	1.1451	1.41069	0.228284	2.09845	2.11053	1.09353	2.31796	0.679854	2.47471	0.25949	0.577821	0.66297	1.52458	1.05381	1.11302	1.10057	0.570581	0.111611	0.445874	0.302735	0.772593	0.901453	0.432998	0.438831	1.13962	2.67525	1.62616	0	1.63058	0.623997	0	2.16516	0.652176	1.57389	3.36375	0	1.23431	0.962304
hsa-miR-4743-5p	MIMAT0019874	0	0	0	0	0	0	0	0	0	0	0	0	0	1.04923	0	0	0	0	0	0	0	0	0	0.210761	0.185504	0	0	0.111611	0.445874	0	0	0	0	0.219416	0	0	0	0	0	0	0	0	0	0.262315	0	0	0	0
[truncated: 688 more rows]
[truncated: 344 more columns]
