# Supplementary material for: Integrated genomic analyses of lung squamous cell carcinoma for identification of a possible competitive endogenous RNA network by means of TCGA datasets
Source: PeerJ. 2018 Jan 12;6:e4254. doi: 10.7717/peerj.4254 (PMC5768173; doi:10.7717/peerj.4254)
Supplement: Supplemental Information 5 [file peerj-06-4254-s005.xlsx]

## Sheet: lncRNA各分组样本数据
GeneID	lncRNA	Biotype	TCGA-18-3412(T1)	TCGA-18-4086(T1)	TCGA-21-1071(T1)	TCGA-21-1076(T1)	TCGA-21-5782(T1)	TCGA-21-5784(T1)	TCGA-21-5786(T1)	TCGA-22-0944(T1)	TCGA-22-1002(T1)	TCGA-22-1005(T1)	TCGA-22-1011(T1)	TCGA-22-1012(T1)	TCGA-22-1016(T1)	TCGA-22-4596(T1)	TCGA-22-4599(T1)	TCGA-22-4605(T1)	TCGA-22-4607(T1)	TCGA-22-4609(T1)	TCGA-22-4613(T1)	TCGA-22-5474(T1)	TCGA-22-5477(T1)	TCGA-22-5478(T1)	TCGA-22-5482(T1)	TCGA-22-5485(T1)	TCGA-22-5489(T1)	TCGA-22-5491(T1)	TCGA-33-4587(T1)	TCGA-33-A4WN(T1)	TCGA-33-AAS8(T1)	TCGA-33-AASB(T1)	TCGA-33-AASD(T1)	TCGA-33-AASJ(T1)	TCGA-33-AASL(T1)	TCGA-34-2600(T1)	TCGA-34-2608(T1)	TCGA-34-5231(T1)	TCGA-34-5241(T1)	TCGA-34-5927(T1)	TCGA-34-5929(T1)	TCGA-37-3789(T1)	TCGA-37-3792(T1)	TCGA-37-4129(T1)	TCGA-37-4130(T1)	TCGA-37-4135(T1)	TCGA-37-4141(T1)	TCGA-39-5022(T1)	TCGA-39-5031(T1)
172	AFG3L1P	non-coding	190.532	195.231	457.941	288.683	204.494	101.736	223.195	340.142	264.45	296.161	357.025	112.966	413.236	171.469	117.663	156.667	126.724	226.857	224.779	212.138	215.233	123.717	131.127	237.477	109.515	127.295	690.292	194.4	498.455	464.304	521.525	516.788	441.208	318.758	164.822	246.339	140.432	189.566	153.9	274.752	146.856	371.809	178.929	163.617	238.938	255.258	168.911
245	ALOX12P2	non-coding	115.415	161.967	123.684	8.5343	33.7079	25.6552	15.4856	70.8893	18.7886	32.9068	23.6915	137.451	51.251	5.1699	63.4457	44.0158	8.9452	24.7542	41.5929	60.1422	41.5909	49.4867	25.601	13.7006	21.3539	37.7497	79.433	127.2	98.8962	155.036	251.121	129.44	61.3478	52.3089	27.7103	84.8448	73.3599	95.1921	103.737	60.4455	123.85	32.3625	211.013	186.618	58.3691	51.6833	43.863
303	ANXA2P1	non-coding	54.7731	107.318	161.809	133.581	122.472	132.257	79.1113	155.13	83.1397	53.0165	455.096	51.7529	80.7103	43.5135	47.2959	267.079	93.9247	156.663	76.1062	120.284	105.537	127.402	171.09	167.547	84.1956	112.078	51.8855	92	139.956	107.24	201.345	96.3504	167.312	67.0208	98.9654	58.0898	334.102	69.2802	89.2902	126.386	144.939	6.8321	56.1468	124.935	38.5714	80.6834	42.7087
304	ANXA2P2	non-coding	8253.52	12616.4	14122.1	8018.18	9685.39	11004.3	6288.17	11119.8	6064.97	4828.15	12132.2	5552.03	5586.36	5150.53	5499.02	14003	12030.9	7174.3	7599.11	10747.9	8118.79	11274.3	15979.1	14865.1	6828.38	9026.56	2648.57	8532.4	8978.37	5896.98	10619.3	5653.53	8857.01	9729.46	14349.6	4262.73	32533.2	8928.69	5277.75	17328.2	19714.7	551.96	4947.71	9312.6	4768.52	5592.13	3782.61
305	ANXA2P3	non-coding	7.8247	9.5042	8.4229	11.1317	15.7303	8.8466	6.0596	6.9936	6.576	9.1408	133.884	8.9037	5.6497	6.8932	1.1536	11.1905	13.0451	4.4083	1.7699	6.2876	4.419	7.1071	9.054	6.8503	2.7455	4.3895	6.9537	13.6	6.181	4.4181	31.3901	14.5985	34.7018	7.3559	7.9172	4.3387	38.1471	7.3644	3.8124	14.9151	15.3374	0	14.191	9.932	2.3894	4.5941	1.5391
342	APOC1P1	non-coding	0.7825	0	0	10.7607	1.1236	0.4423	0.3366	0.3179	0	0	0	0.5565	0.4036	0.4308	1.1536	0	0	0.6782	0.885	0.5467	0.7798	0	0	0.2854	0.9152	0.5853	0	0	0.4415	0	0	0	1.2393	0	0.7197	0	0.4192	0.2728	0	0.3925	1.9172	0	322.69	2.091	1.024	1.4356	0
606	NBEAP1	non-coding	0.7825	13.8602	9.7529	41.1874	35.9551	0	11.1092	0.6358	2.8183	0	2.7548	0.5565	3.632	1.7233	3.4607	15.2936	2.2363	5.0865	9.7345	26.7906	1.2997	0.5265	31.8451	57.9421	2.1354	0	7.2212	6.8	53.8631	3.6148	72.1973	0.4866	18.5902	17.1639	7.5574	53.9922	1.6768	3.5458	0.602	6.2801	0.7669	0	0.617	25.0915	1.024	4.5941	1.5391
618	BCYRN1	non-coding	0	0	0	0	0	0	0	0	0	0	0	0	0	0	0	0	0	0	0	0	0	0	0	0	0	0	0	0	0	0	0	0	0	0	0	0	0	0	0	0	0	0	0	0	0	0	0
690	BTF3P11	non-coding	0	0	0	0	2.2472	0	0	0	0	0	0.551	0.5565	0	0	0	0.746	0.3727	0	0	0	0	0.5265	0	0.2854	0	0	0	0	0	0	0.8969	0.4866	0.6197	0.4087	0	0	0	0	0	0	0	0	0	0	0	0	0.3848
711	ERC2-IT1	non-coding	0	0.396	0	0	10.1124	0.4423	0	0	0	1.8282	1.1019	0	0.4036	0	0	0	0	0.3391	0	0	0	0	0	0	0.3051	0.5853	0	0	0	0	0.8969	0	0	0	0	0	0	0.2728	0	0	0	0.3596	0	0	0	0.2871	1.5391
750	GAS8-AS1	non-coding	0	1.188	2.6599	1.4842	3.3708	1.327	0.6733	3.1789	3.7577	5.4845	2.2039	0	4.4391	4.7391	0	3.3571	0	2.3737	1.7699	2.7337	1.2997	0.2632	0	0.2854	1.2202	0.5853	8.291	3.2	4.415	7.6313	4.0359	3.8929	5.5771	2.0433	0.3599	2.1693	0.4192	1.9093	1.4046	5.1025	1.1503	8.2704	1.851	0	2.048	4.3069	1.9238
1057	CELP	non-coding	0	0	0.8866	0	0	286.63	1.6832	0.3179	0	0	0	0	0.4036	0	1.1536	0	0	0	1.7699	0.2734	64.7258	0	1.561	0	0	234.399	0	7.2	28.2561	0	42.6009	0.9732	0	405.803	0.3599	0	0	0	129.421	0	0	0	0	0	0	0.2871	0
1197	CLK2P1	non-coding	6.2598	8.3161	19.5057	23.3766	33.7079	15.4816	13.8024	11.1261	21.6069	3.6563	58.4022	18.9204	18.1598	9.909	20.7641	11.9365	9.6906	6.782	16.8142	10.9349	9.3579	10.7923	14.0493	8.5629	18.6084	5.56	31.2918	14.8	11.479	32.5334	29.5964	24.8175	40.2789	15.9379	16.5542	16.8726	10.0608	13.6378	13.0424	14.1301	19.1718	16.1812	15.425	12.023	20.1391	18.0892	16.1601
1556	CYP2B7P	non-coding	99.374	22.5724	141.86	235.621	65.1685	611.744	27.2681	101.089	1161.61	502.742	50.6887	37.2844	788.136	1185.63	11.5356	301.397	17.5177	643.608	34.5133	60.4155	83.9615	94.4986	6.2441	94.477	240.994	58.8192	0	34.8	68.8742	235.365	8.9686	11.6788	6.8164	74.7855	443.005	22.4164	135.401	43.6411	27.4893	7.0651	4.6012	2.8767	12.34	48.092	46.7636	90.1586	219.7
1564	CYP2D7	non-coding	7.8247	16.6323	10.6395	28.9425	7.8652	11.9429	5.3863	54.9948	19.7281	27.4223	20.9366	18.3639	21.3882	8.6165	14.9963	13.4286	7.0816	12.8857	24.7788	4.9207	21.5753	6.5807	29.6597	8.5629	9.7618	21.3622	29.6871	32	59.1611	44.1811	64.574	71.5328	83.0364	79.2808	10.0765	30.3706	2.096	23.1843	13.0424	56.913	27.2239	54.297	21.5949	33.978	5.8028	14.9307	9.6191
1587	ADAM3A	non-coding	0	0	0	0	5.618	0	0	0	0	0	0	0	0	0	0	0	0	0	0	0	0	0	0	0	0	0	0	0	0	0	0	0	0	0	0	0	0	0	0	0	0	0	0	0	0	0	0
2282	FKBP1AP1	non-coding	26.2128	15.8403	7.5363	19.666	24.7191	14.1546	14.8123	10.1725	13.6218	10.9689	13.7741	6.1213	2.4213	16.3714	25.3783	2.2381	12.2997	18.3113	11.5044	14.7622	27.5539	2.8955	39.9625	3.1397	14.0326	2.6337	29.1522	18.8	20.7506	18.8774	20.6278	35.5231	22.3083	26.1545	18.7135	3.8566	9.2224	11.7285	30.9004	26.6902	19.5552	5.7533	0.617	12.023	1.7067	27.5644	16.5448
2310	FOXO3B	non-coding	293.036	406.303	531.53	781.447	431.461	453.832	619.088	801.399	575.402	533.821	573.554	444.074	665.053	409.285	258.397	845.981	168.468	1091.9	542.478	589.667	1178.58	600.421	587.886	624.518	1092.41	409.101	1453.33	727.2	688.742	245.406	462.332	568.37	658.714	838.578	530.814	684.062	461.958	953.831	925.809	511.039	275.69	336.929	140.676	193.413	337.927	645.18	510.581
2498	FTH1P3	non-coding	116.98	287.105	766.486	582.56	305.618	174.721	359.535	226.019	156.885	170.018	183.471	472.454	292.575	171.9	422.202	757.222	259.784	441.506	237.168	412.794	330.387	205.317	434.28	475.81	229.402	220.938	291.522	599.6	1215.45	1457.58	951.121	636.496	604.803	71.5161	349.078	200.06	166.422	105.557	390.268	185.654	325.153	84.8616	202.992	270.779	143.704	285.407	169.296
2630	GBAP1	non-coding	438.967	322.349	290.369	563.265	502.247	938.627	264.602	377.334	350.408	475.32	384.573	714.524	456.013	457.538	607.926	506.555	730.898	304.849	320.354	473.209	209.514	824.164	380.269	450.407	324.885	276.538	746.991	387.2	506.843	507.682	304.036	454.501	430.674	394.36	393.702	265.14	376.86	292.941	334.086	279.462	744.632	784.969	883.542	540.512	818.533	602.685	395.152
2679	GGT3P	non-coding	3.9124	13.8602	37.6815	18.9239	23.5955	70.773	68.002	36.2394	283.238	58.5009	30.854	15.5815	23.0024	30.1579	11.5356	15.2936	50.3168	26.1105	4.4248	15.8557	4.9389	25.7963	7.8052	7.4212	12.5073	20.4843	4.5467	16	45.0331	31.3284	22.4215	1.9465	5.5771	9.8079	36.3473	53.2691	13.8336	20.184	30.6998	19.6252	24.1564	3.5958	8.638	28.2279	7.8508	13.208	25.3944
2681	GGTA1P	non-coding	62.989	85.1414	70.0432	391.466	93.2584	161.893	84.8342	12.3977	204.796	254.113	194.49	31.7195	267.555	392.914	147.655	177.182	73.798	255.002	161.947	155.276	50.9488	68.1758	31.2207	74.7824	154.358	55.6003	41.9898	47.2	19.426	8.8362	24.2152	15.5718	39.6592	62.5255	240.396	76.4086	197.443	25.9119	70.0276	95.7708	296.396	94.5703	241.863	50.183	107.181	272.199	140.054
2713	GK3P	non-coding	31.6901	43.5607	34.135	56.7718	34.8315	20.3472	9.426	40.6898	17.8492	56.6728	46.832	8.3472	49.2333	83.5803	54.2173	36.5555	51.0622	55.273	36.2832	27.6107	7.0185	15.2672	13.1127	17.982	17.6933	167.093	23.2683	59.2	19.426	26.107	20.1794	2.4331	27.2657	17.1639	36.3473	31.5758	36.0511	42.5501	12.4404	37.6803	71.319	15.1025	64.7848	58.024	53.5904	31.2971	39.2459
2970	GTF2IP1	non-coding	4795.38	5102.55	4416.71	5768.46	4617.98	5272.14	4945.97	3334.66	5270.21	4444.24	7896.42	6215.92	4050.04	4243.64	6411.48	5164.03	5511.37	3547.64	3276.99	3811.92	7716.66	6969.99	5588.82	4947.91	3255.87	4082.82	6765.18	4140.8	4972.63	3299.93	5933.18	3654.5	8354.45	9269.72	5332.25	4868.45	4570.95	6552.71	5942.71	1843.98	1822.09	9984.9	4170.29	3971.25	6084.04	4143.85	5909.2
2974	GUCY1B2	non-coding	10.5634	5.1481	19.0624	23.7477	14.6067	0	4.713	32.7426	21.1372	16.4534	1.1019	15.025	5.6497	12.9248	10.382	13.4286	2.2363	32.5534	8.8496	21.0498	14.8167	1.5794	16.547	14.5569	1.8303	18.7285	54.56	2	0.883	8.8362	35.8744	49.635	109.682	11.8512	10.4363	2.8924	8.8032	5.1824	0.602	6.6726	1.5337	56.8141	2.468	3.1364	15.7016	0.8614	2.6933
3044	HBBP1	non-coding	0	0	0	0	1.1236	0	1.6832	0	0	0	1.6529	0	0	0	1.1536	0.373	0	1.0173	0	0	0	0	0	0.5709	1.5253	0	0	0.4	0.4415	0	0.8969	0	0	0	0.3599	1.4462	0	0	1.0033	0	0.3834	0	0.617	0	0	0.2871	1.1543
3116	HLA-DPB2	non-coding	3.1299	5.1481	7.9796	3.7106	14.6067	16.8086	3.7031	1.5894	1.8789	14.6252	5.5096	0	7.2639	63.7623	14.9963	3.7302	2.2363	16.2767	14.1593	36.0853	3.1193	4.4749	0.9366	3.4251	37.2169	6.1453	155.924	2.4	4.415	5.2214	0	3.8929	4.9574	2.452	13.3153	7.9542	11.3184	2.7276	5.6183	7.0651	13.4202	1.7979	14.191	213.8	18.4324	39.6239	40.7849
3128	HLA-DRB6	non-coding	328.13	281.046	128.206	957.863	308.157	1136.84	254.92	67.4688	587.182	637.13	181.636	303.066	743.878	1553.42	544.768	238.357	215.68	1168.9	441.531	542.799	175.454	247.626	116.534	375.767	721.034	269.793	79.4758	55.812	88.7064	84.137	104.036	60.1022	47.2874	124.189	1320.67	148.399	500.511	120.076	298.207	595.686	3.8344	0	1055.15	141.986	546.318	804.439	920.773
3136	HLA-H	non-coding	1803.99	2187.14	1843.73	4933.21	2537.08	3698.33	1199.8	1367.24	1559.46	4190.13	1352.62	975.515	1625.91	2680.6	2150.23	1633.06	863.958	2330.62	1139.82	6405.69	573.694	1234.01	1703.09	1334.38	2699.75	799.181	2039.05	519.2	1082.56	2099.41	2600.9	1472.51	4208.83	430.731	1971.03	1981.08	3579.54	375.586	4042.54	4987.15	3569.4	1503.78	2922.1	3030.32	2802.06	11237.4	2018.85
3137	HLA-J	non-coding	2.0814	20.1963	4.1671	8.6234	16.8539	7.0773	3.0298	1.3924	17.4875	69.4698	14.4242	6.6778	15.7385	17.2331	2.4571	4.6329	2.2363	11.7701	13.2743	3.8272	3.7536	2.4296	1.8951	2.7658	5.1127	4.6821	4.4691	1.2	5.7395	14.0697	7.9462	7.7859	10.5345	1.6347	18.5047	14.2212	3.3536	3.2731	4.2137	7.5125	7.0629	3.4556	22.2551	28.7507	4.4647	26.1288	7.4913
3139	HLA-L	non-coding	66.1189	42.7687	63.8369	41.9295	40.4494	15.4816	29.288	26.0669	27.2435	144.424	61.157	9.4602	68.2002	101.675	42.6817	10.4444	8.5725	61.0376	61.9469	30.0711	16.6363	33.9563	35.2794	23.6906	27.7601	21.9475	36.9083	22.4	13.245	20.0823	12.5561	36.983	43.3772	26.9718	101.844	76.1675	22.6368	18.5475	63.2054	158.571	30.2914	12.5854	64.7848	66.9106	37.2061	152.466	18.8534
3262	HPVC1	non-coding	0	0	0	0	13.4831	0	0	0	0	0	0	0	0	0	0	0	0	0	0	0	0	0	0	0	0	0	0	0	0	0	0	0	0	0	0	0	0	0	0	0	0	0	0	0	0.3413	0	0
3311	HSPA7	non-coding	53.2081	62.9651	119.694	141.373	215.73	88.0239	24.9116	61.3526	62.0025	109.689	106.336	129.104	120.662	400.238	193.798	147.714	87.9612	103.764	71.6814	100.055	45.23	28.4285	108.648	41.3872	41.4877	9.6569	222.519	29.6	143.046	506.477	129.148	40.8759	74.361	61.2996	98.6055	26.0319	55.3343	72.8261	34.5122	193.112	491.564	4.315	40.7219	81.0246	112.301	212.763	62.7164
3580	CXCR2P1	non-coding	5.8685	13.8602	15.9592	181.447	23.5955	2.654	9.7627	0.9537	8.9246	155.393	21.4876	2.2259	24.6166	70.6555	295.311	8.2063	2.2363	32.5534	166.372	227.173	20.2755	10.2659	1.2488	20.2654	183.644	36.2865	20.3263	3.2	2.2075	0.8033	0.8969	5.8394	13.6328	2.8606	17.9937	43.6276	28.9248	3.5458	48.3572	37.6803	791.794	6.8321	315.903	7.3183	69.9747	384.753	20.3925
3653	IPW	non-coding	68.5603	110.007	29.4315	169.562	495.899	207.913	219.125	200.842	359.699	430.987	334.981	206.461	310.823	215.835	336.401	213.171	38.4458	234.91	331.894	151.329	311.643	229.947	182.654	182.303	192.338	115.063	543.193	123.164	73.3907	133.676	7.1749	6.1898	164.09	64.4544	276.65	371.772	44.4645	1665.84	233.262	17.1916	243.29	993.912	30.1712	245.358	129.784	158.903	115.675
4213	MEIS3P1	non-coding	128.326	159.195	441.538	178.479	108.989	200.818	92.2404	73.1145	344.771	409.506	99.7245	143.573	353.511	383.866	102.667	462.539	170.332	225.839	144.248	252.05	38.7315	578.31	47.1433	257.457	285.228	52.0887	200.856	117.2	123.62	399.237	277.579	17.0316	149.342	140.58	288.259	86.05	410.396	109.103	95.5104	189.186	288.727	79.4678	157.952	169.89	125.954	410.595	238.938
4500	MT1L	non-coding	22.6917	29.7005	13.2993	24.1187	29.2135	88.4662	12.1192	5.4041	60.5933	45.7038	44.6281	527.546	44.7942	46.0984	11.5356	49.6111	103.988	68.8369	4.4248	27.064	6.7585	13.4246	13.7371	7.992	101.584	22.8254	223.857	6	16.777	99.6084	1.3453	3.4063	8.0558	30.2411	70.5353	11.8108	144.624	49.0962	19.062	129.133	164.877	18.3387	85.1458	18.2959	26.6245	54.2675	26.5487
4888	NPY6R	non-coding	0.7825	0	2.2166	3.3395	6.7416	0	0	0	1.8789	1.8282	2.2039	0	2.8249	0.4308	0	0.746	0	1.3564	0	0	1.0398	0.2632	0.3122	0	0	0	0.2675	0.4	3.532	0	0.4484	0.4866	2.4787	0.4087	0	1.2052	0	1.091	0.602	0	0.7669	2.1575	0.617	0	1.024	1.1485	0.3848
5301	PIN1P1	non-coding	0	0.396	0	0.7421	3.3708	0.4423	0.3366	1.2716	0.9394	0	2.2039	1.6694	0.8071	0.8617	1.1536	0.373	3.3545	1.0173	0	0.2734	1.0398	0	0.6244	1.4271	0.9152	1.4632	0.2675	0	0	0	1.7937	0	0.6197	0.4087	0.3599	1.4462	0.4192	1.091	1.6052	0	0.3834	1.7979	0	2.091	0.3413	0	1.9238
5369	PMCHL1	non-coding	0	0	0	0	4.4944	0	0	0	0	0	0	0	0.4036	0	0	0	0	0	0	0	0	0	0	0	0	0	0	0.4	0	0	0	0	0	0.8173	0	0	0	0	0	0.785	0	0	0	0	0	0	0
5370	PMCHL2	non-coding	0	0	0	0	5.618	0.4423	0	0	0	0	0	0	0	0	0	0	0	0	0	0	0	0	0	0.2854	0	0	0	0.4	0	0	0	0	0	2.452	0	1.4462	0	0	0	0	0	0	0	0	0	0	0
5379	PMS2P1	non-coding	649.613	422.828	328.108	243.217	293.786	264.479	683.286	378.787	245.732	196.088	127.961	366.934	196.126	367.327	681.984	300.889	638.051	182.716	484.796	273.322	319.717	501.319	362.523	319.166	361.702	417.459	369.564	222.576	319.969	152.437	411.126	324.316	495.523	552.419	313.137	301.479	701.077	441.795	330.92	162.076	236.653	433.254	549.233	1383.15	640.009	251.103	327.134
5380	PMS2P2	non-coding	81.1737	79.2251	87.8954	93.3729	94.382	55.2914	65.9822	70.4601	25.3646	24.1682	74.9311	64.8525	35.109	31.0195	177.648	64.1587	35.7808	73.0722	96.4602	37.9333	72.5578	32.6217	96.3191	54.8023	68.6377	41.8465	52.6879	25.616	89.6247	47.4264	163.843	61.3431	165.453	76.6939	40.6658	107.483	126.598	89.0715	45.7166	47.2809	43.3129	69.0399	66.0188	157.475	90.7964	49.6734	37.7068
5382	PMS2P4	non-coding	53.2081	33.2646	30.1452	22.2635	28.0899	24.3282	54.1996	41.3256	26.7738	21.9378	20.3857	36.7279	15.3349	25.4188	83.0562	39.1666	34.29	21.7023	38.0531	38.819	48.0894	26.3227	54.3241	32.5389	23.1843	33.9454	35.8385	14.8	39.7351	17.2708	56.0538	49.1484	53.9117	37.5971	43.1849	47.2431	42.3391	23.7298	28.2919	27.8677	19.5552	91.6936	11.106	74.229	54.9557	25.2674	22.701
5383	PMS2P5	non-coding	95.4617	101.774	99.7451	47.1243	48.3146	86.2546	52.1798	124.295	67.1693	51.1883	82.6446	75.1252	46.8119	77.9796	197.259	75.7222	99.5155	60.6985	71.6814	76.2712	56.4076	66.3332	112.082	117.311	62.2315	50.6255	101.364	106.8	150.993	40.1647	64.574	158.637	215.027	95.6273	65.4971	202.953	301.404	96.2831	65.2119	94.9858	47.1626	80.5466	38.2539	128.071	75.7775	49.9605	71.1812
5387	PMS2P3	non-coding	60.6416	55.4409	68.7133	52.3191	35.9551	11.0583	41.7438	35.6036	53.0779	47.532	78.2369	90.1503	44.3906	66.3473	55.3708	32.8254	29.4447	50.5256	39.823	35.8119	105.277	36.0621	73.6809	23.6906	33.8613	35.7012	73.2816	47.2	81.2362	89.9689	104.036	74.9392	296.204	99.7139	39.2263	52.787	39.4047	67.0982	28.0913	44.3529	23.773	84.1424	85.7628	209.096	72.7054	34.7427	30.3963
5616	PRKY	non-coding	19.9531	994.769	73.1464	5.5659	22.4719	1.327	180.104	32.7426	176.143	314.442	671.625	4.4519	167.877	1.2925	1.1536	6.7143	346.254	665.31	5.3097	67.5232	975.305	35.2724	831.408	1.998	170.832	14.6316	20.3263	38	5.7395	25.7054	17.4888	1203.89	27.8854	1.226	129.195	252.847	59.1071	56.4607	6.8222	527.132	136.12	0.7192	100.571	465.238	0.3413	306.08	7.3105
5820	PVT1	non-coding	182.316	182.955	149.396	129.499	159.551	139.334	95.2702	159.262	88.7763	67.6417	87.0523	168.058	55.6901	136.572	352.989	133.167	132.687	73.2452	322.124	133.68	127.372	43.1693	250.39	200.371	150.393	173.531	123.028	130.4	347.02	159.052	317.489	680.292	435.631	49.4483	89.9685	144.14	106.896	148.925	78.8563	192.719	106.978	2.1575	90.0818	438.055	49.8356	101.357	76.9527
5969	REG1CP	non-coding	0	0	0	0	20.2247	0	0	0	0	0	0	0	0	0	0	0	0	0	0	0	0	0	0	0	0	0	0	0	0	0	0	0	0	0	0	0	0	0	0	0	0	0	0	0	0	0	0
6023	RMRP	non-coding	12.9108	20.9884	11.5261	7.4212	33.7079	38.0405	57.2294	11.1261	9.864	29.2505	9.9174	15.025	8.8781	216.706	20.7641	19.0238	386.508	21.3632	13.2743	15.8557	7.5383	11.8452	33.7184	13.4152	23.7944	54.1371	12.8377	8.8	9.713	15.6642	11.6592	5.8394	21.6886	42.501	38.5065	32.5399	35.6319	8.7282	15.0489	32.9703	50.9969	85.2211	107.358	139.571	61.7825	15.2179	123.894
6043	SNORA63	non-coding	0	0	2.2166	0.3711	3.3708	0	0.6733	0.3179	0	0	0	0	0.8071	0	0	0.373	0	0.3391	0	0.5467	0.5199	0	0.3122	0	0	1.7558	0.2675	0	3.0905	1.6066	0.4484	2.9197	3.718	0	0.3599	0.241	0.8384	0.2728	1.0033	0	0.3834	2.1575	7.404	3.6592	0.3413	0	1.1543
6044	SNORA62	non-coding	0	0	0.4433	0	1.1236	0	0	0	0	0	0	0	0	0	0	0	0	0	0	0	0	0	0	0	0	0	0.2675	0	0	0	0	0.9732	0	0	0	0	0	0	0	0.3925	0	0	0	1.0455	0.3413	0	0
6079	SNORD15A	non-coding	0	0	0	0	0	0	0.3366	0	0	0	0	0	0	0.4308	0	0	0.3727	0	0	0	0	0	0	0	0	0	0	0	0	0.8033	0	0	0	0	0	0	0	0	0	0	0	0	1.234	0	0.3413	0	0
6082	SNORD20	non-coding	0	0	0	0	0	0	0	0	0	0	0	0	0	0	0	0	0	0	0	0	0	0	0	0	0	0	0	0	0	0	0	0	0	0	0	0	0	0	0	0	0	0	0	0	0	0	0
6083	SNORD21	non-coding	0	0	0	0	0	0	0	0	0	0	0	0	0	0	0	0	0	0	0	0	0	0	0	0	0	0	0	0	0	0	0	0	0	0	0	0	0	0	0	0	0	0	0	0	0	0	0
6086	RNY4	non-coding	0	0	0	0	0	0	0	0	0	0	0	0	0	0	0	0	0	0	0	0	0	0	0	0	0	0	0	0	0	0	0	0	0	0	0	0	0	0	0	0	0	0	0	0	0	0	0
6090	RNY5	non-coding	0	0	0	0	0	0	0	0	0	0	0	0	0	0	0	0	0	0	0	0	0	0	0	0	0	0	0	0	0	0	0	0	0	0	0	0	0	0	0	0	0	0	0	0	0	0	0
6290	SAA3P	non-coding	0	0	0	0	1.1236	0	0	0	0	0	0	0	0	0	0	0	0	0	0	0	0	0.2632	0	0	0	0	0	0	0	0	0	0.4866	0	0	0	0	0	0	0	0	0	0	0	0	0	0.2871	0
6315	ATXN8OS	non-coding	0	0	0	0	2.2472	0	0	0	0	0	0	0	0	0	0	0	0	0	0	0	0	0	0	0	0	0	0	0	0	0	0	0	0	0	0	0	0	0	0	0	0	0.3596	0	0	0	0	0
6702	SPRR2C	non-coding	18.7793	25.7404	1.3299	28.9425	128.09	302.555	4.713	303.584	1830.48	0	258.402	784.085	27.0379	2.585	1.1536	547.587	10.4361	402.17	38.0531	0.8201	0.5199	0.2632	12.8005	4.8523	0.3051	3314.07	4.0118	2.8	0.883	2.8115	1.3453	19.9513	422.618	106.253	7.5574	27.7192	737.372	8.1827	20.2659	77.3231	2.684	0.3596	0	1.0455	0.3413	3.7327	272.413
6791	AURKAPS1	non-coding	20.3443	9.1082	27.9286	15.5844	37.0787	11.5006	7.4062	8.583	23.9555	38.3912	30.303	28.3806	25.8273	6.8932	61.1386	14.9206	51.8077	13.2248	30.0885	12.8486	24.9545	16.8465	15.6104	36.2495	19.8287	13.7537	31.5592	36	16.777	24.5005	35.426	23.3577	73.7413	23.2938	10.0765	25.3088	16.3488	31.9125	28.8939	23.5502	23.773	6.4725	17.276	85.2065	36.8647	16.9406	20.0077
6998	TDGF1P3	non-coding	0.7825	0.396	0.4433	0.3711	7.8652	0.8847	0	0	0.4697	0	0	0.5565	0.8071	0.8617	0	2.6111	0	0.3391	0	0.5467	0.2599	0	0	0	0.6101	0.8779	0	0	0	0.8033	0	0	0	0	0	0	0	0	0.2007	0	0	0	1.851	0	15.7016	0.8614	0.3848
7012	TERC	non-coding	0.3912	1.188	0	0	3.3708	0.8847	2.3565	1.2716	1.4091	1.8282	0.551	4.4519	2.0178	0.8617	1.1536	0.373	0.3727	0.6782	23.0088	0	2.8594	0.5265	2.1855	0.5709	0	9.3643	1.8722	0.8	22.0751	1.6066	2.6906	2.4331	1.2393	1.6347	0.3599	1.2052	0	0.8183	0	0.3925	0.3834	1.4383	5.553	20.9096	18.091	0	5.7715
7117	TMSB4XP8	non-coding	29716.4	35149.9	23068.2	36400.7	42065.2	62219.2	22446.4	20498.5	28035.9	45351	34041.3	53514.7	30124.7	45750.3	35003.6	28117.9	141394	29175.7	28641.6	29194.6	10683.6	36258.2	24195.8	20275.4	20872.3	113897	26471.2	27243.2	24576.2	8907.72	36474.9	15280.8	27107	25292.6	59655.6	13717.9	86705.5	33168.9	13029.5	52582.5	51455.1	41850.8	151014	47810.8	21635.5	36326.5	28552.9
7151	TOP1P1	non-coding	41.471	63.7571	101.962	112.802	125.843	204.357	102.003	130.653	136.687	104.205	144.904	75.6817	111.38	84.8728	83.0562	117.5	50.3168	134.622	67.2566	65.3362	86.8209	142.143	96.1599	66.5049	74.7388	66.7203	204.868	118	81.2362	97.1985	100.897	76.399	123.935	93.9926	71.9748	89.4245	132.048	105.557	88.8889	86.7432	116.564	43.5095	187.567	67.9561	62.1239	100.208	97.7299
7152	TOP1P2	non-coding	1.9562	2.376	3.5465	5.1948	15.7303	10.6159	2.6931	7.3115	3.7577	3.6563	1.6529	8.3472	3.632	5.6007	2.3071	8.2063	1.1182	8.1384	1.7699	2.4604	2.0795	5.0013	3.4343	2.8543	1.5253	3.219	10.9655	10	8.3885	13.2543	7.1749	7.7859	14.8722	2.452	4.3185	3.8566	1.6768	2.1821	7.6248	3.14	7.6687	2.5171	20.9779	6.7956	5.8028	6.604	4.2324
7221	TRPC2	non-coding	0.7825	0.792	0	18.9239	1.1236	1.327	0	0.6358	0.4697	1.8282	0	1.6694	2.0178	1.7233	1.1536	2.6111	0.3727	2.0346	0	0.2734	0.2599	1.8426	0.6244	0.5709	0.6101	0.2926	0.8024	0.4	1.3245	0.4016	0.8969	0	0.6197	2.0433	3.9586	9.1594	0.8384	8.4555	1.0033	2.355	13.4202	0.3596	5.553	2.6137	1.024	5.7426	0.3848
7503	XIST	non-coding	1.5649	0	0	5918.84	3753.9	1231.78	2.6931	0	0	5.4845	1.1019	1210.82	3.3656	3792.45	946.207	1614.73	0	6.1038	2330.11	1.5637	1.0398	2.3454	2.8099	1647.02	0	6.1453	637.275	0.168	10648.8	6.1894	4.0359	12.0925	12628.9	7531.1	14.0351	3.8566	0	8479.09	3053.1	1.1775	0	7796.91	5939.82	0.183	971.164	1.5333	3830.65
7696	ZNF137P	non-coding	26.2128	24.1564	10.6395	52.6902	25.8427	21.6742	14.139	25.4311	53.5476	40.2194	116.804	4.4519	74.657	23.2646	21.9176	13.4286	26.8356	28.1451	23.8938	13.942	27.294	6.5807	28.4109	3.996	13.7275	8.779	124.097	22.8	23.3996	30.1235	15.2466	0.9732	46.4756	69.0642	16.1943	3.6155	23.4752	3.5458	55.9819	2.7475	6.9018	35.2391	78.3588	3.6592	14.6776	24.1189	36.5525
7754	ZNF204P	non-coding	109.546	50.6889	142.303	66.7904	165.168	203.472	153.846	34.332	274.314	288.848	427.548	75.1252	334.947	130.971	13.8427	160.77	94.6701	73.9234	92.9204	81.7387	66.8053	167.676	142.367	32.8243	92.127	86.6194	62.851	51.2	77.7042	81.1326	51.5695	137.713	263.981	202.697	139.991	219.584	140.851	177.019	387.259	94.2008	98.5429	754.405	12.34	233.142	272.389	127.773	183.532
7955	RNF217-AS1	non-coding	22.7739	30.9756	55.9459	15.2393	43.1236	14.1856	5.4099	4.4632	7.0598	1.8464	11.0579	33.5281	11.7595	0.4351	1.1651	37.5552	4.8453	23.9539	30.177	24.1689	89.9246	1.8505	26.3253	19.2265	0.9182	32.1282	6.2075	29.78	47.585	10.1858	41.7309	48.5012	50.6336	12.7176	19.8758	7.0142	14.7181	34.9811	12.308	17.694	4.6166	1.0787	0	14.6681	4.4442	17.8767	11.1697
8123	PWAR5	non-coding	3.9124	1.98	3.5465	4.0816	19.1011	2.2117	4.0397	6.9936	7.0457	7.3126	14.3251	6.1213	10.8959	6.8932	20.7641	8.5794	1.1182	17.294	8.8496	1.6402	10.1378	4.2116	5.9319	5.1377	5.491	3.5116	37.4432	8.4	2.2075	22.0906	0.4484	0	3.718	2.8606	4.3185	22.8985	1.6768	68.1892	3.8124	0	5.3681	6.4725	1.234	11.5003	1.7067	2.8713	4.2324
8418	CMAHP	non-coding	82.1596	186.123	180.871	264.935	170.786	402.079	164.619	106.493	655.723	1212.07	401.102	91.2632	542.776	364.048	245.708	246.936	402.162	425.229	141.593	135.867	127.112	907.081	57.7584	33.6806	151.613	171.19	172.774	81.6	119.647	64.6651	37.2197	106.569	64.4462	83.3674	364.912	60.0181	405.785	623.795	208.678	83.9957	411.043	33.8008	307.882	131.208	98.6473	373.842	689.881
8420	SNHG3	non-coding	40.6886	55.0449	93.0954	167.347	55.0562	24.7705	12.4558	52.7696	92.0643	56.6728	36.3636	56.7613	85.1493	62.9007	83.0562	23.5	54.044	41.37	75.2212	29.7977	13.2571	48.1706	53.3874	46.5249	59.1809	30.1412	39.0479	92.8	72.4062	69.0832	43.0493	151.825	194.578	19.6159	36.3473	115.457	28.9248	66.8254	49.7617	138.946	54.0644	25.1708	156.101	199.164	71.6814	46.2278	45.0173
8511	MMP23A	non-coding	0	0	0	18.9239	39.3258	38.9251	0	8.583	19.2583	0	0	0	26.2308	0	0	0	0	0	0	0	0	0	0	0	32.0309	0	0	0	0	5.6231	0	0	0	0	0	0	25.152	0	0	0	0	0	0	0	0	0	0
8512	MBL1P	non-coding	1.5649	2.376	6.2064	10.7607	26.9663	2.654	1.3466	3.4968	37.5773	36.5631	8.8154	2.2259	39.1445	11.2015	6.9214	6.7143	1.4909	8.4774	7.0796	1.6402	1.5597	5.0013	1.2488	3.1397	2.4405	1.7558	19.5239	4	21.1921	14.0576	0.8969	1.9465	3.0984	26.9718	10.7962	4.3387	2.096	1.9093	3.2104	2.355	0.7669	81.6253	0	4.1819	2.048	8.0396	11.5429
8551	INE2	non-coding	0	0.8752	0.1596	2.0408	30.427	21.3602	21.5317	0	10.5263	0	0	0	11.5012	0	7.2097	5.9198	8.9899	0	17.7876	0	14.458	9.6578	9.3194	3.1911	0	8.1615	13.1506	4.236	4.6799	6.9646	0.9821	5.9416	21.763	47.4336	17.1336	1.8945	3.3326	2.4985	0	0.7654	0	7.4613	0	0	5.4444	20.0818	0.8657
8552	INE1	non-coding	8.9984	8.7121	18.1758	32.6531	14.6067	13.2699	4.3764	19.0734	24.8949	32.9068	17.6309	12.7991	32.2841	9.909	16.1498	9.3254	6.7089	27.1278	21.2389	11.2083	6.2386	15.2672	7.8052	8.5629	9.7618	8.4864	44.3969	28.8	31.3466	44.9844	52.4664	23.3577	39.0395	31.4671	11.516	29.6475	8.8032	24.8209	21.8711	24.3352	8.4356	21.2154	13.574	5.2274	15.019	9.4753	12.3124
8755	ADAM6	non-coding	25000.4	215745	38833.7	124247	262585	294613	194462	84053.5	153572	1.50904e+06	1.01067e+06	72918.3	32515.5	200386	141802	92619	108592	324970	116682	308693	28401.1	100088	32865.2	310.535	503666	17761.6	25970.3	175174	16322.1	2932.21	211.946	39274.8	67684.4	19889.5	237237	90365.6	32081.1	83031.1	5743.67	7460.99	23409.3	202.359	221659	35022	45370.5	687573	260730
8847	DLEU2	non-coding	99.8631	48.2732	137.169	72.1002	46.4382	42.8796	43.087	146.235	25.7028	25.8684	19.9945	101.224	59.5238	54.7882	232.419	31.4266	160.06	52.784	118.133	35.6315	40.9774	18.2785	43.8245	24.2615	105.458	36.4211	120.599	73.976	64.5166	78.4095	107.386	107.178	293.775	86.5427	36.2501	57.9114	104.372	55.9397	75.4934	156.53	119.341	69.7375	240.919	209.76	236.931	33.9789	32.8703
8944	SNORD73A	non-coding	0	0	0	0	0	0	0	0	0	0	0	0	0	0	0	0	0	0	0	0	0	0	0	0	0	0	0	0	0	0	0	0	0	0	0	0	0	0	0	0	0	0	0	0	0	0	0
9297	SNORD29	non-coding	0	0	0	0	0	0	0	0	0	0	0	0	0	0	0	0	0	0	0	0	0	0	0	0	0	0	0	0	0	0	0	0	0	0	0	0	0	0	0	0	0	0	0	0	0	0	0
9298	SNORD31	non-coding	0	0	0	0	0	0	0	0	0	0	0	0	0	0	0	0	0	0	0	0	0	0	0	0	0	0	0	0	0	0	0	0	0	0	0	0	0	0	0	0	0	0	0	0	0	0	0
9299	SNORD30	non-coding	0	0	0	0	0	0	0	0	0	0	0	0	0	0	0	0	0	0	0	0	0	0	0	0	0	0	0	0	0	0	0	0	0	0	0	0	0	0	0	0	0	0	0	0	0	0	0
9300	SNORD28	non-coding	0	0	0	0	0	0	0	0	0	0	0	0	0	0	0	0	0	0	0	0	0	0	0	0	0	0	0	0	0	0	0	0	0	0	0	0	0	0	0	0	0	0	0	0	0	0	0
9301	SNORD27	non-coding	0	0	0	0	0	0	0	0	0	0	0	0	0	0	0	0	0	0	0	0	0	0	0	0	0	0	0	0	0	0	0	0	0	0	0	0	0	0	0	0	0	0	0	0	0	0	0
9302	SNORD26	non-coding	0	0	0	0	0	0	0	0	0	0	0	0	0	0	0	0	0	0	0	0	0	0	0	0	0	0	0	0	0	0	0	0	0	0	0	0	0	0	0	0	0	0	0	0	0	0	0
9303	SNORD25	non-coding	0	0	0	0	0	0	0	0	0	0	0	0	0	0	0	0	0	0	0	0	0	0	0	0	0	0	0	0	0	0	0	0	0	0	0	0	0	0	0	0	0	0	0	0	0	0	0
9304	SNORD22	non-coding	0	0	0.0709	0.5937	2.1573	0	0.2996	0	0	0	0	0	0	0	0	0	0	0.2102	0	0	0	0	0	0	0	0	0.3611	0	0.7196	1.3616	0	0.0876	1.7475	0	0	0.0121	0	0	0	0	0	0	0	0	0	0	0
9366	RAB9BP1	non-coding	0	0	0	0	3.3708	0	0	0	0	0	0	0	0	0	0	0	0	0	0	0	0	0	0	0	0	0	0	0	0	0	0	0	0	0	0	0	0	0	0	0	0	0	0	0	0	0	0
9383	TSIX	non-coding	0	0	1.7732	789.506	416.888	242.512	0	0.3179	0	0	0	238.264	1.477	44.4915	50.4682	8.6316	0	0	148.655	0.3499	0	1.0766	0	135.193	0	0	5.4105	3.832	4081.02	7.065	0	1.5328	832.948	998.942	0	0	0.4192	82.7435	594.151	0	0	2008.55	1400.6	2.4307	124.197	0.4766	25.0596
9597	SMAD5-AS1	non-coding	31.6901	17.0283	2.2166	9.2764	11.236	5.7503	9.7627	1.2716	4.2274	5.4845	14.3251	7.7908	4.0355	3.8774	2.3071	8.5794	5.218	13.903	30.0885	10.1148	7.0185	2.6323	7.8052	5.7086	3.6607	42.1391	1.8722	25.6	8.3885	3.6148	4.4843	18.4915	15.4919	77.6461	6.4777	26.9961	4.192	3.2731	11.0359	8.2426	2.684	1.4383	2.468	6.7956	2.048	6.604	65.025
9629	CLCA3P	non-coding	3.5211	4.3561	0.4433	0	23.5955	109.256	0.3366	2.861	1108.06	1.8282	26.9972	0.5565	0.8071	0	0	1.119	35.4081	6.782	0	0.2734	0.5199	0.5265	10.3028	0.8563	0	34.8233	0	2.4	1.3245	1.2049	2.2422	3.8929	13.0132	2.452	6.1179	0	44.8543	1.3638	0.602	5.495	2.684	0	0	0	1.024	1.4356	1.9238
9808	KIAA0087	non-coding	0	0.792	0	1.1132	23.5955	0	0	0	0.9394	0	0.551	1.113	3.2284	0.4308	0	0.373	0.3727	0.3391	0.885	0.5467	0.5199	1.3161	0	0	0	0	0.8024	0.8	0	0	0	0	0	2.452	0.7197	0	0.4192	0	0.602	0	0.3834	82.3445	0	0	3.0721	2.0099	0
9834	KIAA0125	non-coding	20.3443	74.0532	69.5999	176.252	223.595	74.754	62.6157	56.9022	108.974	1076.78	710.744	45.0751	81.1138	144.758	50.7566	30.2143	69.3254	201.424	83.1858	109.623	26.7741	78.7049	15.2982	0	159.85	11.4127	34.7687	119.2	54.7461	2.8115	1.3453	41.3625	26.0263	4.0866	277.463	58.0898	16.3488	21.0023	9.832	7.4576	6.9018	0.3596	276.415	73.7062	40.9608	524.298	237.014
10141	LINC01587	non-coding	1.1737	0.792	0.8866	0.3711	10.1124	5.308	0.3366	0.9537	1.8789	0	0	0	0.4036	1.2925	0	0.373	10.0634	0	0	3.0071	0.2599	1.3161	1.2488	0.2854	0	3.8042	543.728	0	0.883	2.4099	1.7937	0	1.2393	1.226	0.7197	0	1.6768	1.091	1.4046	1.1775	0	0	4.319	72.138	3.7547	12.6337	0
10151	HNRNPA3P1	non-coding	107.59	107.318	129.89	87.5696	146.067	82.7159	101.33	223.158	124.475	84.0951	113.499	208.125	85.5529	56.4383	89.9776	118.246	73.4253	115.972	150.442	124.658	59.5269	71.0713	96.1599	133.01	155.579	100.081	159.133	125.6	128.035	139.371	193.274	343.066	231.139	132.816	60.8187	125.339	90.9663	219.569	143.065	84.7807	100.46	41.7116	112.294	88.3429	68.9507	140.406	67.3336
10230	NBR2	non-coding	153.756	188.103	137.427	209.276	104.494	130.93	144.757	90.9163	192.583	107.861	131.68	132.443	161.017	67.6398	186.876	80.5714	101.006	73.2452	185.841	251.777	157.785	60.5422	84.9204	119.88	114.091	249.909	139.342	139.2	233.113	242.996	113.901	262.774	304.26	180.221	53.6212	213.317	49.8847	323.762	196.037	38.8578	191.334	127.652	162.271	232.619	271.024	35.3169	132.743
10255	HCG9	non-coding	0	0	0	0	2.2472	0	0.3366	0	0	1.8282	0.551	0	0	0.4308	0	0	0.3727	0	0	0	0	0	0.6244	0	0	0	0	0	0	0.4016	0	0	0.6197	0	0	0	0.4192	0	0	0	0	1.4383	0	0.5227	0	0	0
10301	DLEU1	non-coding	492.093	129.89	109.498	88.3711	87.6404	242.521	78.1552	206.409	109.627	100.548	171.846	147.329	56.4972	76.2994	391.057	111.845	249.545	116.565	127.425	183.816	73.2207	94.3038	160.674	118.601	56.3775	225.181	53.426	86	108.68	160.024	165.399	211.504	124.084	60.4822	127.507	122.02	203.668	76.3828	47.9097	306.376	110.429	122.308	542.446	323.053	246.789	97.624	174.559
10357	HMGB1P1	non-coding	394.362	200.926	162.926	100.323	308.551	161.606	176.236	226.445	191.071	165.759	175.521	237.173	140.436	127.512	337.508	81.5226	162.531	135.904	350.628	209.226	159.514	105.275	131.255	134.437	189.882	177.561	435.288	118.888	97.6821	95.865	130.161	154.934	185.636	256.077	144.335	147.787	193.213	118.936	96.5719	323.909	191.503	134.865	473.633	389.132	284.176	140.495	205.96
10408	MYCNOS	non-coding	0	0.792	0	0	0	1.327	14.8123	0	0	0	0	0	0.8071	0	1.1536	0	0	0.3391	0.885	0	0	0	0.3122	0	1.5253	1.1705	5.0816	0	0	1.6066	0	1.4599	1.2393	1.226	0	0	0	0.5455	0.4013	0.3925	0.3834	0	13.574	2.6137	62.4652	0	3.0781
10597	TRAPPC2B	non-coding	133.412	142.554	116.498	106.03	191.494	286.768	144.905	166.491	95.1691	102.377	197.554	66.2048	151.437	148.579	259.493	128.735	174.316	159.278	102.496	143.349	108.401	205.628	155.676	292.351	168.595	254.722	207.184	111.1	183.859	95.8691	211.377	89.5718	280.173	184.585	169.717	157.045	220.805	155.308	175.725	344.822	326.909	180.442	339.83	171.824	172.971	104.969	210.135
10737	RFPL3S	non-coding	0.7825	5.1481	10.1962	10.7718	0	2.8132	5.7229	3.1789	11.2732	6.2523	10.1928	15.5815	22.1953	6.9148	11.5356	5.2222	2.609	4.4083	11.5044	4.6473	20.7954	6.3912	4.6831	7.1357	3.3556	7.4973	21.1286	16	29.6026	28.9949	13.9013	11.6788	28.1146	2.9301	5.9703	10.1958	1.6768	10.9103	14.762	5.495	6.135	7.1917	13.574	7.8411	8.8748	9.7624	8.8842
10740	RFPL1S	non-coding	8.5563	68.5606	36.5156	10.2449	43.7079	1.5614	23.3126	1.1508	5.1669	0	5.1295	58.9872	7.841	62.039	28.2737	22.4182	1.1182	3.4147	25.6991	110.664	18.3416	2.6639	6.0475	45.2976	7.1597	5.7005	33.8994	8.96	3.5232	1.5102	5.6099	2.3163	0.8118	86.4078	12.4336	1.8512	1.4295	3.3876	2.8151	4.4471	5.7515	5.178	3.085	8.2018	5.6321	7.1208	2.0854
10748	KLRA1P	non-coding	10.1721	9.9002	25.7121	27.0872	11.236	1.7693	15.149	7.6293	31.9407	34.7349	42.9752	11.1297	41.1622	38.3436	8.0749	12.3095	30.1901	20.3459	13.2743	13.942	29.1136	4.2116	5.6197	3.1397	8.5416	14.9243	82.6424	9.2	21.1921	16.4675	34.9776	24.8175	25.4067	13.8946	14.7548	38.5658	14.672	20.184	13.4437	19.2327	24.1564	40.9924	46.8919	20.9096	13.6536	23.5446	14.2362
10778	ZNF271P	non-coding	395.54	429.271	428.239	438.59	313.483	610.417	514.728	318.207	714.907	391.225	566.942	691.152	621.065	469.17	391.057	478.952	460.306	503.9	1932.74	426.736	878.867	1176.89	554.48	421.293	451.178	709.342	742.444	532.4	637.528	366.302	298.655	391.241	447.405	600.327	457.04	344.923	437.644	738.625	697.266	357.178	313.267	804.027	392.411	1136.96	812.048	557.031	1025.78
10866	HCP5	non-coding	1665.49	1984.79	577.192	1017.81	377.528	935.088	527.521	385.6	1031.97	2018.28	1193.94	460.768	738.499	1202.44	567.551	312.96	843.832	958.63	858.407	3709.4	237.068	370.361	1393.69	402.169	1282.46	560.392	1880.18	216	392.053	644.241	2209.42	937.713	1041.05	143.032	1023.84	1055.26	2108.57	198.294	1069.48	4865.08	3773.77	295.217	2482.18	3281.76	3446.85	3179.67	1024.62
10895	PPBPP2	non-coding	0	0	0	0	7.8652	0	0	0	0	1.8282	0	0	0	0	0	0	0	0	0	0	0	0	0	0	0	0	0	0	0	0.8033	0	0	0	0	0	0	0	0	0	0	0	0	0	1.5682	0	0	0
10934	MORF4	non-coding	2.3474	2.376	3.9898	2.5974	5.618	4.8656	3.7031	1.2716	2.8183	0	5.5096	2.2259	2.4213	2.1541	1.1536	4.1032	2.609	5.7647	2.6549	4.1006	2.3395	2.8955	5.3075	4.5669	2.1354	5.56	4.5467	3.2	3.532	3.6148	2.6906	1.4599	1.859	3.678	2.5191	3.1335	6.288	51.8238	4.615	5.1025	3.8344	2.1575	4.319	4.1819	7.1681	3.1584	3.4629
10984	KCNQ1OT1	non-coding	20.3443	26.1364	79.3794	114.286	459.607	23.0012	65.6455	69.9356	56.3659	155.393	88.7052	69.0039	328.527	24.9879	38.0674	76.4719	9.6906	166.165	57.5221	26.7906	36.1321	23.164	9.9906	41.1018	41.4877	12.2906	121.963	91.208	120.971	17.2708	91.9283	99.2701	117.757	353.085	32.3887	27.9675	21.3792	41.1863	75.8505	127.956	156.074	13.6641	260.373	337.167	73.7294	91.02	111.974
11191	PTENP1	non-coding	261.737	286.709	358.196	307.607	375.281	210.992	348.426	140.825	358.863	234.004	155.372	237.062	346.247	368.357	275.701	242.833	518.822	163.784	178.761	213.505	303.873	263.754	271.308	82.2035	178.153	189.333	109.922	332.4	330.243	38.5581	150.224	94.4039	39.0395	297.916	307.332	344.682	294.697	71.735	89.0895	525.562	282.209	284.43	125.868	141.662	503.135	229.703	257.022
11209	MST1P2	non-coding	29.3427	69.3012	88.6623	51.2059	104.494	34.9442	5.7229	16.2123	98.1706	82.2669	61.708	91.8197	164.649	38.3436	28.839	28.3492	92.0611	19.6677	129.203	30.8912	43.1505	31.324	103.341	37.6766	21.659	13.1685	198.716	83.6	68.8742	75.1079	101.794	69.5864	143.145	162.648	49.3027	102.923	64.9759	87.5549	66.4159	51.0254	23.0061	314.635	918.093	179.822	188.078	39.0496	47.7107
11257	TP53TG1	non-coding	1523.08	300.569	224.759	238.59	539.326	620.591	436.964	179.607	290.754	232.175	448.485	224.819	133.576	429.534	342.607	415.166	841.222	199.39	251.327	245.489	364.7	1212.42	441.461	195.519	170.832	433.097	191.495	234.4	335.541	55.0256	856.502	256.934	726.878	490.805	528.655	194.999	809.474	220.387	451.467	917.673	104.294	421.072	352.306	662.311	484.02	250.664	253.174
22947	DUX4L1	non-coding	0	0	0	0	0	0	0	0	0	0	0	0	0	0	0	0	0	0	0	0	0	0	0	0	0	0	0	0	0	0	0	0	0	0	0	0	0	0	0	0	0	0	0	0	0	0	0
22973	LAMB2P1	non-coding	9.3897	2.772	12.4127	23.3766	30.3371	8.8466	37.7041	11.1261	28.1829	23.766	18.1818	21.7028	20.9847	21.1105	31.1461	23.5	11.5542	12.2075	12.3894	21.3231	35.3522	16.8465	23.1033	25.1177	18.9135	16.6801	25.4079	10.8	22.0751	7.6313	35.8744	49.635	22.3083	39.6404	12.9555	8.9183	6.288	14.7289	9.4306	0.785	2.3006	30.205	3.085	8.8866	22.8698	25.2674	9.2343
23434	LINC01565	non-coding	0	0.396	0.4433	0	19.1011	0	0	0	0	0	0	0.5565	1.6142	0	0	0	0	0	0	0	0	0.2632	0	0	0	0	0	0	0	0.8033	0	0	0.6197	0.4087	0	0	0	0.5455	0	0	0	0	0	0	2.048	0	0
23574	PRG1	non-coding	6.651	3.1681	0	1.8553	11.236	0	15.8223	0.9537	0.4697	0	39.6694	19.4769	0.4036	0	2.3071	1.8651	11.9269	4.0692	0.885	6.0142	0.2599	10.5291	1.8732	3.4251	0.6101	30.1412	0.2675	1.2	2.649	0	5.3812	26.764	4.3377	33.5104	2.5191	108.466	0	18.8202	3.4111	0.3925	0	0	0	3.1364	0	1.4356	2.3086
23591	FAM215A	non-coding	0	0.396	0	0.3711	3.3708	0	0.3366	0	0.9394	3.6563	2.2039	0	0	2.585	0	0	0	0.6782	0	1.0935	0	0	0	0	0.6101	0	0.2675	0	0.4415	0	0	0	0	0	0.7197	1.4462	0.4192	0.2728	0	0.3925	0	0	0	0	0.3413	2.0099	0.3848
23614	PPY2P	non-coding	0	0	0	0	4.4944	0	0.3366	0	0	0	0	5.0083	0.8071	0.4308	1.1536	0	0	0	5.3097	0.8201	0.7798	0	0	0	0	0	2.4071	0	0	0.4016	0	0	0	0	0	1.2052	0	10.6375	19.062	0	0	0	3.702	0	2.048	0	0
23615	PYY2	non-coding	12.9108	2.772	73.1464	135.436	107.865	3.0963	1.0099	364.937	2.3486	5.4845	2.2039	10.0167	4.4391	0.4308	170.727	70.5	0	4.0692	2.6549	4.6473	3.8991	1.8426	1.2488	3.4251	2.7455	72.2803	12.0353	2	12.362	4.8198	73.5426	541.606	17.9706	10.6253	0.7197	186.08	0.8384	22.9116	8.628	60.053	6.135	10.7875	10.489	27.7052	8.8748	8.901	26.5487
23629	BRD7P3	non-coding	0.7825	0	0	0.3711	12.3596	0.4423	1.6832	0.3179	0.9394	0	0.551	0.5565	0	0	0	0	0	0.6782	0	0	0.2599	1.0529	0.3122	0	0.3051	0.5853	0.8024	2	0.883	2.0082	0.8969	0.4866	0	0	0	0.241	0.8384	0.2728	0.8026	1.9625	0	0.3596	0.617	2.6137	1.7067	0	0.3848
23642	SNHG1	non-coding	938.967	1557.1	1124.61	1050.98	902.337	785.58	737.287	1274.1	1086.45	965.265	652.893	1864.77	1443.91	471.324	1388.88	232.389	1269.47	394.5	1686.73	807.272	872.108	356.41	1043.4	959.897	832.499	1114.64	936.788	1280.8	1571.47	1777.93	909.865	2534.22	2838.22	541.479	453.801	2555.94	1008.59	1233.95	735.189	1558.24	1456.29	448.4	2819.68	2616.31	1405.64	487.833	1267.41
23766	GABARAPL3	non-coding	0.7825	1.584	0.8866	0.7421	13.4831	0.4423	1.0099	1.9073	2.8183	1.8282	4.9587	3.3389	1.2107	1.2925	5.7678	2.9841	4.0999	1.6955	5.3097	1.9136	3.1193	2.8955	1.2488	2.2834	0.6101	4.3895	2.1396	4.4	5.7395	0.8033	4.9327	1.4599	3.0984	2.452	0.3599	0.9641	1.6768	4.0914	1.4046	0	1.1503	2.1575	1.234	1.0455	0.6827	1.4356	0.7695
25774	GSTTP1	non-coding	0	0	0	0.7421	0	0	0	0	0	0	0	0	0	0	0	0	0	0	0	0	0.7798	0	0.3122	0	0	0	0	0	0	0	0	0	0	0	0	0.241	0	0	0	0	0	0	1.234	0	0	0	0
25786	DGCR11	non-coding	57.5117	60.193	26.5987	46.7532	47.191	154.374	32.3178	56.9022	73.7454	54.8446	66.6667	76.2382	26.6344	33.1736	20.7641	80.9444	37.6444	66.4632	41.5929	50.8475	51.2087	43.1693	29.0353	32.5389	19.2186	38.0423	25.6753	48.8	110.817	92.3788	119.282	22.871	21.6886	33.1018	76.6532	63.1516	59.5263	51.551	55.38	72.2206	58.2822	29.1262	58.6148	35.0235	25.2592	49.0991	28.4725
25787	DGCR9	non-coding	2.3474	11.0882	26.5987	11.5028	69.6629	6.1926	40.0606	4.1326	6.576	18.2815	25.3444	13.3556	31.8805	29.727	59.9851	7.0873	4.0999	17.294	6.1947	59.0487	54.328	26.5859	39.9625	28.2575	14.6427	23.118	4.5467	17.2	26.9316	9.2379	134.529	34.0633	22.928	93.9926	5.758	34.4682	6.7072	106.921	45.9493	24.7277	3.0675	7.1917	8.021	3.6592	7.5095	12.6337	14.621
25812	POM121L1P	non-coding	0.3912	1.98	0.8866	4.0816	7.8652	0	0	0.6358	2.3486	20.1097	1.1019	0	2.8249	0.4308	0	0.373	0	1.0173	0.885	0.5467	0	0.5265	0.9366	0.2854	0.9152	0.2926	0.5349	2.8	4.415	0.4016	0.4484	1.4599	0	0.4087	1.7994	0.7231	1.2576	0.8183	3.6117	1.9625	0.3834	0.3596	1.234	18.2959	1.024	1.1485	0.3848
25826	SNORD82	non-coding	0	0	0	0	0	0	0	0	0	0	0	0	0	0	0	0	0	0	0	0	0	0	0	0	0	0	0	0	0	0	0	0	0	0	0	0	0	0	0	0	0	0	0	0	0	0	0
25845	PP7080	non-coding	412.05	737.392	257.733	210.679	1119.06	799.916	1044.88	783.072	336.702	327.002	693.625	747.184	818.12	383.061	738.785	629.11	373.004	715.571	527.69	435.038	956.296	840.287	2019.22	609.662	146.174	504.01	392.843	428.56	680.737	885.021	614.354	1945.46	380.201	858.68	411.851	269.469	282.289	260.848	391.601	284.329	370.111	644.477	486.238	383.701	445.469	427.872	1196.2
25859	PART1	non-coding	1132.24	167.115	131.663	9.2764	315.73	32.2902	12.7925	1.2716	4.6972	0	306.336	2.2259	22.5989	3.8774	58.8315	96.9841	7.0816	36.6226	61.0619	26.7906	56.6675	145.301	104.902	230.056	2.4405	306.387	85.5844	180	81.2362	88.3623	215.695	166.423	86.1348	57.2129	43.9046	65.0798	8.384	71.735	7.8254	1.9625	0.3834	0.7192	12.34	124.412	286.384	144.139	263.178
26062	HYALP1	non-coding	0	0	0	0	3.3708	0	0	0	0	0	0	0	0	0	0	0	0	0	0	0	0	0	0	0	0	0	0	0	0	0	0	0	0	0	0	0	0	0	0	0	0	0	0	0	0	0	0
26070	DKFZP434K028	non-coding	0	0	0	0	1.1236	0	0	0.9537	0	0	0	0	0	0	0	0.373	0	0.3391	0	0	0	0	0	0	0	0.2926	0	0	0	0	0	0	0	0	0	0	0	0.5455	0	0	0	0	0.617	0	0	0	0
26077	DKFZP434H168	non-coding	0	0	0	0	21.3483	0	0	0	0	0	0	0	0	0	0	0	0	0	0	0	0	0	0	0	0	0	0	0	0	0	0	0	0	0	0	0	0	0	0	0	0	6.1129	0	0	0.6827	0	0
26082	DKFZP434L187	non-coding	0.6142	0.396	4.8809	1.6141	70.5843	0	5.3156	0	3.4853	1.8282	0	1.4079	5.5408	0	0	0	0	0	1.1858	0.2734	2.3499	0	0.7118	0.8563	0.3051	1.1179	37.7481	0	0	5.5066	1.9417	0	0.6197	0.4087	1.1012	56.5568	0.4192	0.6737	0.602	11.6102	9.1411	0	0	6.4036	0.6827	3.1268	8.08
26102	DKFZP434A062	non-coding	0.3912	0.792	0.8866	0.3711	31.4607	0	1.6832	0.3179	0.4697	0	0.551	0	0	0.8617	0	0.746	0.7454	0.6782	0	0.2734	0	0.5265	1.561	0.2854	0.3051	0	2.4071	0.8	3.0905	0.8033	0.4484	0	1.2393	0.4087	0.3599	0.4821	0	5.1824	2.6085	0.785	0	0.7192	0	0.5227	0.6827	0.5743	0
26138	LINC00588	non-coding	0	0	0	0	6.7416	0	0	0	0	0	0	0	0	0	0	0	0	0	0	0	0	0	0	0.2854	0	0	0	0	0	0.4016	0	0	0	0	0	0	0.4192	0	0	0	0	0	0	0	0	0	0
26184	OR1F2P	non-coding	0	0	0	0	3.3708	0	0.6733	0	0	0	1.6529	0	0.4036	0	0	0	0	0	0	1.0935	2.0795	0	0.3122	0	0	0	0	0	0.883	0	0	0	0	0	0	2.1693	0.4192	0.5455	0.2007	0	0	0.3596	0	0	0	0	0
26220	DGCR5	non-coding	3.5211	63.3611	62.9502	40.0742	248.315	19.0202	338.663	13.3513	11.7429	51.1883	71.0744	31.7195	71.8321	237.385	110.742	16.7857	64.4801	26.4496	9.7345	183.16	58.4871	33.1666	313.759	128.158	100.364	36.2865	9.3608	35.2	139.514	42.5746	299.552	125.547	73.1216	184.307	39.5861	84.7412	56.5919	148.091	108.352	44.7454	44.0951	4.315	11.106	2.091	75.4361	63.7427	40.0154
26222	DGCR10	non-coding	0	1.188	4.8764	0.3711	6.7416	0	6.3962	1.5894	0.4697	7.3126	2.7548	1.113	3.2284	5.1699	10.382	0.746	0.3727	2.0346	0	4.9207	2.5994	3.422	4.6831	0.8563	1.8303	1.7558	0.2675	3.2	2.2075	1.2049	6.278	5.8394	3.0984	9.3993	0.3599	3.1335	0.4192	9.2737	5.0163	3.5325	0	1.7979	3.702	0	1.7067	0.5743	1.5391
26238	LINC01558	non-coding	1.9562	0.792	3.1032	1.4842	5.618	5.7503	1.3466	0.6358	2.3486	7.3126	1.1019	10.5732	9.6852	16.8022	4.6142	2.2381	5.218	3.0519	0.885	3.5539	1.0398	2.1058	1.561	0.5709	2.1354	0.8779	45.4667	0.4	0.883	1.2049	0.8969	0.4866	0.6197	2.8606	2.1592	0.4821	2.096	2.7276	1.0033	3.5325	0.7669	19.7771	22.8289	43.9101	1.3654	6.604	4.6172
26247	OR2L1P	non-coding	0	0	0	0.3711	10.1124	0.8847	0	0	0	0	0	0	0.4036	0	0	0	0	0	0	0	0	0	0	0	0.3051	0	0	0.4	0	0	0	0	0	0.8173	0	0	0.4192	0	0	0	0	0	0	0	0.3413	0.2871	0
26255	PTTG3P	non-coding	16.4319	9.5042	8.4229	4.4527	6.7416	3.0963	6.3962	5.722	2.3486	5.4845	28.6501	7.2343	3.2284	3.0158	10.382	1.4921	7.0816	2.0346	6.1947	2.187	4.419	1.8426	5.6197	4.5669	9.4567	9.9495	2.1396	12	5.7395	2.8115	6.278	16.0584	40.8985	5.7213	1.0796	8.6773	5.0304	7.3644	2.2072	7.8501	4.6012	0	7.404	10.4548	16.7257	4.3069	5.3867
26343	OR5E1P	non-coding	0	0	0.4433	0	3.3708	0	0.3366	0.3179	0	0	0	0	0.4036	0	0	0	0	0.3391	0	0	1.5597	0	0	0	0	0	0	0	1.766	0	0.4484	0	0	0.8173	0.3599	0	0	1.091	0.2007	0	1.1503	0	0	0	0	0	0.7695
26765	SNORD12C	non-coding	0	0	0	0	0	0	0	0	0	0	0	0	0	0	0	0	0	0	0	0	0	0	0	0	0	0	0	0	0	0	0	0	0	0	0	0	0	0	0	0	0	0	0	0	0	0	0
26769	SNORD81	non-coding	0	0	0	0	0	0	0	0	0	0	0	0	0	0	0	0	0	0	0	0	0	0	0	0	0	0	0	0	0	0	0	0	0	0	0	0	0	0	0	0	0	0	0	0	0	0	0
26770	SNORD79	non-coding	0	0	0	0	0	0	0	0	0	0	0	0	0	0	0	0	0	0	0	0	0	0	0	0	0	0	0	0	0	0	0	0	0	0	0	0	0	0	0	0	0	0	0	0	0	0	0
26771	SNORD102	non-coding	0	0	0	0	0	0	0	0	0	0	0	0	0	0	0	0	0	0	0	0	0	0	0	0	0	0	0	0	0	0	0	0	0	0	0	0	0	0	0	0	0	0	0	0	0	0	0
26772	SNORD4B	non-coding	0	0	0	0	0	0	0	0	0	0	0	0	0	0	0	0	0	0	0	0	0	0	0	0	0	0	0	0	0	0	0	0	0	0	0	0	0	0	0	0	0	0	0	0	0	0	0
26773	SNORD4A	non-coding	0	0	0	0	0	0	0	0	0	0	0	0	0	0	0	0	0	0	0	0	0	0	0	0	0	0	0	0	0	0	0	0	0	0	0	0	0	0	0	0	0	0	0	0	0	0	0
26774	SNORD80	non-coding	0	0	0	0	0	0	0	0	0	0	0	0	0	0	0	0	0	0	0	0	0	0	0	0	0	0	0	0	0	0	0	0	0	0	0	0	0	0	0	0	0	0	0	0	0	0	0
26775	SNORA72	non-coding	0	0	0.4433	0	0	0.4423	0	0.6358	0	0	0	0	0.4036	0	0	0	0	0.6782	0	0	0.2599	0	0	0	0	0	0.5349	1.2	0	1.6066	1.3453	0.4866	0	0.4087	0	0.241	0	0	0	0	0	2.1575	0	0.5227	0.3413	0.2871	0
26776	SNORA71B	non-coding	0	0	0	0	0	0	0	0	0	0	0	0	0.8071	0	0	0	0	0	0	0	0	0	0	0.2854	0	0	0	0	0	0.4016	0	0.4866	0.6197	0	0	0	0	0	0	0	0	0	0	0	0	0	0
26777	SNORA71A	non-coding	0	0	0	0	0	0.4423	0	0.9537	0	0	0	0	0.4036	0	0	0	0	0	0	0	0	0	0	0	0	0.5853	0	0.4	0.4415	0	0	0	1.2393	0	0	0.241	0.4192	0	0	0.3925	0	0	0.617	0.5227	0.3413	0	0
26778	SNORA70	non-coding	0	0	0	0	1.0787	0	0	0.5658	0	0	0	0.2282	0.3592	0	0	0	0	0	0	0	0.3483	0	0	0	0	0	0	0	0	0	0	0	0	0	0	0	0	0.0164	0	0	0	1.183	0	0	0	0	0
26779	SNORA69	non-coding	0	0	0	0	0	0	0	0	0	0	0	0	0	0	0	0	0	0	0	0	0	0	0	0	0	0	0	0	0	0	0	0.4866	0	0	0	0	0	0	0	0	0	0	0	0	0	0	0
26780	SNORA68	non-coding	0	0	0	0	0	0	0	0	0	0	0	0.5565	0	0	0	0	0	0	0	0	0	0	0	0	0	0	0.5349	0	0.883	0	0	0.4866	0	0	0	0	0	0	0	0	0	0.7192	0	0.5227	0	0	0
26781	SNORA67	non-coding	0	0.792	0	0.7421	0	0.8847	0.3366	0	1.4091	0	0	0	0.8071	0.4308	0	0	0	1.0173	0	0	0	0	0.3122	0	0	0.2926	1.8722	0	2.649	1.6066	2.2422	1.9465	1.2393	0.4087	0	0.241	0.8384	0.2728	2.0065	0	0.3834	0	0	0	0.3413	0.2871	0.3848
26782	SNORA66	non-coding	0	0	0	0	0	0	0	0	0	0	0	0	0.1574	0	0	0	0	0	0	0	0	0	0	0	0	0	0	0	0	0	0	0	0	0	0	0	0	0	0	0	0	0	0	0	0	0	0
26783	SNORA65	non-coding	0	0	0	0	0	0	0	0.3179	0	0	0	0	0	0	0	0	0	0	0	0	0	0	0	0.2854	0	0	0.5349	0	0.4415	0	0	0.4866	0.6197	0	0	0	0.4192	0	0	0	0	0	0	0	0	0	0
26784	SNORA64	non-coding	0	0	0	0	0	0.2433	0	0	0	0	0	0	0	0	0	0	0	0	0	0	0	0	0	0.1313	0	0	0	0	0	0	0	0	0.2045	0	0	0	0	0	0	0	0	0.2481	0	0	0	0	0.2001
26785	SNORD63	non-coding	0	0	0	0	0	0	0	0	0	0	0	0	0	0	0	0	0	0	0	0	0	0	0	0	0	0	0	0	0	0	0	0	0	0	0	0	0	0	0	0	0	0	0	0	0	0	0
26786	SNORD62A	non-coding	0	0	0	0	0	0	0	0	0	0	0	0	0	0	0	0	0	0	0	0	0	0	0	0	0	0	0	0	0	0	0	0	0	0	0	0	0	0	0	0	0	0	0	0	0	0	0
26787	SNORD61	non-coding	0	0	0	0	0	0	0	0	0	0	0	0	0	0	0	0	0	0	0	0	0	0	0	0	0	0	0	0	0	0	0	0	0	0	0	0	0	0	0	0	0	0	0	0	0	0	0
26788	SNORD60	non-coding	0	0	0	0	0	0	0	0	0	0	0	0	0	0	0	0	0	0	0	0	0	0	0	0	0	0	0	0	0	0	0	0	0	0	0	0	0	0	0	0	0	0	0	0	0	0	0
26789	SNORD59A	non-coding	0	0	0	0	0	0	0	0	0	0	0	0	0	0	0	0	0	0	0	0	0	0	0	0	0	0	0	0	0	0	0	0	0	0	0	0	0	0	0	0	0	0	0	0	0	0	0
26791	SNORD58A	non-coding	0	0	0	0	0	0	0	0	0	0	0	0	0	0	0	0	0	0	0	0	0	0	0	0	0	0	0	0	0	0	0	0	0	0	0	0	0	0	0	0	0	0	0	0	0	0	0
26792	SNORD57	non-coding	0	0	0	0	0	0	0	0	0	0	0	0	0	0	0	0	0	0	0	0	0	0	0	0	0	0	0	0	0	0	0	0	0	0	0	0	0	0	0	0	0	0	0	0	0	0	0
26793	SNORD56	non-coding	0	0	0	0	0	0	0	0	0	0	0	0	0	0	0	0	0	0	0	0	0	0	0	0	0	0	0	0	0	0	0	0	0	0	0	0	0	0	0	0	0	0	0	0	0	0	0
26795	SNORD54	non-coding	0	0	0	0	0	0	0	0	0	0	0	0	0	0	0	0	0	0	0	0	0	0	0	0	0	0	0	0	0	0	0	0	0	0	0	0	0	0	0	0	0	0	0	0	0	0	0
26796	SNORD53	non-coding	0	0	0	0	0	0	0	0	0	0	0	0	0	0	0	0	0	0	0	0	0	0	0	0	0	0	0	0	0	0	0	0	0	0	0	0	0	0	0	0	0	0	0	0	0	0	0
26797	SNORD52	non-coding	0	0	0	0	0	0	0	0	0	0	0	0	0	0	0	0	0	0	0	0	0	0	0	0	0	0	0	0	0	0	0	0	0	0	0	0	0	0	0	0	0	0	0	0	0	0	0
26798	SNORD51	non-coding	0	0	0	0	0	0	0	0	0	0	0	0	0	0	0	0	0	0	0	0	0	0	0	0	0	0	0	0	0	0	0	0	0	0	0	0	0	0	0	0	0	0	0	0	0	0	0
26799	SNORD50A	non-coding	0	0	0	0	0	0	0	0	0	0	0	0	0	0	0	0	0	0	0	0	0	0	0	0	0	0	0	0	0	0	0	0	0	0	0	0	0	0	0	0	0	0	0	0	0	0	0
26800	SNORD49A	non-coding	0	0	0	0	0	0	0	0	0	0	0	0	0	0	0	0	0	0	0	0	0	0	0	0	0	0	0	0	0	0	0	0	0	0	0	0	0	0	0	0	0	0	0	0	0	0	0
26801	SNORD48	non-coding	0	0	0	0	0	0	0	0	0	0	0	0	0	0	0	0	0	0	0	0	0	0	0	0	0	0	0	0	0	0	0	0	0	0	0	0	0	0	0	0	0	0	0	0	0	0	0
26802	SNORD47	non-coding	0	0	0	0	0	0	0	0	0	0	0	0	0	0	0	0	0	0	0	0	0	0	0	0	0	0	0	0	0	0	0	0	0	0	0	0	0	0	0	0	0	0	0	0	0	0	0
26804	SNORD45B	non-coding	0	0	0	0	0	0	0	0	0	0	0	0	0	0	0	0	0	0	0	0	0	0	0	0	0	0	0	0	0	0	0	0	0	0	0	0	0	0	0	0	0	0	0	0	0	0	0
26805	SNORD45A	non-coding	0	0	0	0	0	0	0	0	0	0	0	0	0	0	0	0	0	0	0	0	0	0	0	0	0	0	0	0	0	0	0	0	0	0	0	0	0	0	0	0	0	0	0	0	0	0	0
26806	SNORD44	non-coding	0	0	0	0	0	0	0	0	0	0	0	0	0	0	0	0	0	0	0	0	0	0	0	0	0	0	0	0	0	0	0	0	0	0	0	0	0	0	0	0	0	0	0	0	0	0	0
26807	SNORD43	non-coding	0	0	0	0	0	0	0	0	0	0	0	0	0	0	0	0	0	0	0	0	0	0	0	0	0	0	0	0	0	0	0	0	0	0	0	0	0	0	0	0	0	0	0	0	0	0	0
26808	SNORD42B	non-coding	0	0	0	0	0	0	0	0	0	0	0	0	0	0	0	0	0	0	0	0	0	0	0	0	0	0	0	0	0	0	0	0	0	0	0	0	0	0	0	0	0	0	0	0	0	0	0
26809	SNORD42A	non-coding	0	0	0	0	0	0	0	0	0	0	0	0	0	0	0	0	0	0	0	0	0	0	0	0	0	0	0	0	0	0	0	0	0	0	0	0	0	0	0	0	0	0	0	0	0	0	0
26810	SNORD41	non-coding	0	0	0	0	0	0	0	0	0	0	0	0	0	0	0	0	0	0	0	0	0	0	0	0	0	0	0	0	0	0	0	0	0	0	0	0	0	0	0	0	0	0	0	0	0	0	0
26811	SNORD55	non-coding	0	0	0	0	0	0	0	0	0	0	0	0	0	0	0	0	0	0	0	0	0	0	0	0	0	0	0	0	0	0	0	0	0	0	0	0	0	0	0	0	0	0	0	0	0	0	0
26812	SNORD37	non-coding	0	0	0	0	0	0	0	0	0	0	0	0	0	0	0	0	0	0	0	0	0	0	0	0	0	0	0	0	0	0	0	0	0	0	0	0	0	0	0	0	0	0	0	0	0	0	0
26813	SNORD36C	non-coding	0	0	0	0	0	0	0	0	0	0	0	0	0	0	0	0	0	0	0	0	0	0	0	0	0	0	0	0	0	0	0	0	0	0	0	0	0	0	0	0	0	0	0	0	0	0	0
26814	SNORD36B	non-coding	0	0	0	0	0	0	0	0	0	0	0	0	0	0	0	0	0	0	0	0	0	0	0	0	0	0	0	0	0	0	0	0	0	0	0	0	0	0	0	0	0	0	0	0	0	0	0
26815	SNORD36A	non-coding	0	0	0	0	0	0	0	0	0	0	0	0	0	0	0	0	0	0	0	0	0	0	0	0	0	0	0	0	0	0	0	0	0	0	0	0	0	0	0	0	0	0	0	0	0	0	0
26816	SNORD35A	non-coding	0	0	0	0	0	0	0	0	0	0	0	0	0	0	0	0	0	0	0	0	0	0	0	0	0	0	0	0	0	0	0	0	0	0	0	0	0	0	0	0	0	0	0	0	0	0	0
26817	SNORD34	non-coding	0	0	0	0	0	0	0	0	0	0	0	0	0	0	0	0	0	0	0	0	0	0	0	0	0	0	0	0	0	0	0	0	0	0	0	0	0	0	0	0	0	0	0	0	0	0	0
26818	SNORD33	non-coding	0	0	0	0	0	0	0	0	0	0	0	0	0	0	0	0	0	0	0	0	0	0	0	0	0	0	0	0	0	0	0	0	0	0	0	0	0	0	0	0	0	0	0	0	0	0	0
26819	SNORD32A	non-coding	0	0	0	0	0	0	0	0	0	0	0	0	0	0	0	0	0	0	0	0	0	0	0	0	0	0	0	0	0	0	0	0	0	0	0	0	0	0	0	0	0	0	0	0	0	0	0
26820	SNORD24	non-coding	0	0	0	0	0	0	0	0	0	0	0	0	0	0	0	0	0	0	0	0	0	0	0	0	0	0	0	0	0	0	0	0	0	0	0	0	0	0	0	0	0	0	0	0	0	0	0
26821	SNORA74A	non-coding	0	0	0	0	0	0	0	0.3179	0	0	0.551	1.113	0	0	0	0.373	6.3362	0	1.7699	0.5467	0.2599	0	0	0.2854	0	0.8779	0.5349	0	0	0.4016	0	0	0.6197	0.4087	0.3599	0	0	0.2728	0	0.3925	0.3834	1.7979	0	1.0455	0	0	0
26823	RNU12-2P	non-coding	0	0.396	0.8866	0.7421	1.1236	0	0.3366	0	0.4697	0	0.551	0.5565	0.4036	0	1.1536	0	0	0.3391	0.885	0.2734	0.2599	0	0	0	0.3051	0	1.0698	0.4	0.4415	0	0.4484	0.4866	0.6197	0	0	0.4821	0	0.2728	0	0	0	0.7192	0	0	0.6827	0	0.3848
26824	RNU11	non-coding	0	0	0	0	0	0	0	0	0	0	0	0	0	0	0	0	0	0	0	0	0	0	0	0	0	0	0	0	0	0	0.4484	0	0	0	0	0	0	0	0	0	0	0	0.617	0	0	0	0
26829	RNU5E-1	non-coding	0	0	0	0	0	0	0	0	0	0	0	0	0	0	0	0	0	0	0	0	0	0	0	0	0	0	0	0	0	0	0	0	0	0	0	0	0	0	0	0	0	0	0	0	0	0	0
27004	TCL6	non-coding	1.1737	6.7321	0.8866	3.7106	61.7978	1.7693	0.3366	0.6358	14.0915	12.7971	4.4077	0.5565	1.6142	5.1699	9.2285	1.8651	0	0.6782	4.4248	0.5467	47.5695	1.5794	0.9366	0.2854	8.7612	0.2926	3.5116	5.6	7.947	34.6701	7.6233	0	1.2393	6.6122	3.2389	5.0618	0.4192	5.7115	1.0033	20.8027	3.0675	0	0	0	0.3413	4.4189	20.3925
27099	SND1-IT1	non-coding	3.9124	5.1481	0.8866	21.5213	20.2247	3.0963	1.6832	7.6293	4.6972	0	6.6116	0	1.6142	1.2925	1.1536	10.4444	2.2363	11.5293	2.6549	3.8272	3.8991	1.0529	3.7465	4.5669	0.9152	1.1705	5.0816	22.8	13.6865	2.8115	1.3453	20.438	10.5345	0	1.4395	7.4721	0.4192	2.1821	2.2072	0.785	2.3006	0.3596	3.085	1.0455	1.024	1.7228	2.6933
27160	INGX	non-coding	0.7825	0	0	0.7421	3.3708	0	0.6733	0	0.9394	0	0.551	1.6694	0.4036	0.8617	0	0	0	0	0	0.5467	0.5199	0.7897	0	0.2854	0.6101	0	0	0	0	3.2132	0.8969	0.4866	0.6197	0	0	2.4104	0.4192	0.2728	0	0.3925	0.7669	1.7979	0.617	0	0	0.8614	0.3848
27184	DISC2	non-coding	0	0	0.4433	0	24.7191	0	0	0.6358	0	0	0.551	0.562	0.4076	0	3.4837	0	0	0	1.7876	0	0.2625	1.3188	0	0	0.3051	0	0.2701	0	0	0	0	0.4915	0	1.6347	0	0.7231	0.4234	1.3665	1.0073	0	1.5376	1.8015	1.234	1.5682	0.3413	0	0.3848
27437	HSFY1P1	non-coding	0	0	0	0	10.1124	0	0	0	0	0	0	0	0	0	0	0	0	0	0	0	0	0	0	0	0	0	0	0	0	0	0	0	0	0	0	0	0	0	0	0	0	0	0	0	0	0	0
28997	PRO0611	non-coding	0	0.396	0	0.7421	5.618	0	0	1.2716	0.4697	1.8282	0	0	1.6142	0.4308	0	0	0	0.3391	0	0	0.2599	0	0	0.5709	1.2202	0.2926	0.5349	0.8	0	0.4016	0.4484	0.4866	0.6197	0.4087	0	0	0	1.3638	0.8026	1.1775	1.1503	0.3596	0	0	0	0	0.3848
29018	FOXN3-AS2	non-coding	0	0	0	0	4.4944	0	0	0	0	0	0	0	0	0	0	0	0	0	0	0	0	0	0	0	0	0	0	0	0	0	0	0	0	0	0	0	0	0	0	0	0	0.7192	0	0	0	0.2871	0
29034	CPS1-IT1	non-coding	0	0	0	0	8.9888	0	0	0	0	1.8282	0	0	0	0	0	0	0	0	0	0	0	0	0	0	0	0	0	0	0.4415	21.6889	0	0	0	0	0	0	0	0	0.2007	0	0	0	1.234	0	0	0	0
29053	PRO0628	non-coding	0.3912	1.188	0.4433	0.7421	6.7416	1.327	1.0099	2.2252	2.3486	1.8282	0	1.113	0.8071	1.7233	0	1.8651	0	1.0173	0	0.2734	0.5199	0.2632	0.3122	0	0.3051	0.2926	1.8722	2	1.3245	0	0.4484	0	1.2393	0	1.0796	0.9641	0.4192	1.3638	0.4013	4.3175	4.2178	0.7192	2.468	0	0.6827	0.2871	0.3848
29065	ASAP1-IT1	non-coding	0	0	0.8866	0.3711	16.8539	0	0	0	0	0	0	0	0	0	0	0	0	0	0	0	0	0	0	0	0.3051	0.2926	0	0	0	0	0	0	0	0	0	0	0	0.2728	0	0	0	0	0	0	0	0	0
29075	LINC00652	non-coding	1.1737	1.584	0.4433	0.7421	14.8427	0	4.0397	0	0.9394	7.3126	1.1019	0	2.9701	0.5084	0	0.414	0.3727	1.3564	0	2.187	3.1427	0	0	0.5766	4.5758	6.1453	6.2878	1.2	0	0	0.8969	0	0	35.6845	1.4395	23.7903	0.4192	1.432	3.0098	0.3925	0	5.1384	1.4685	0	0.6827	1.7228	3.0781
29092	LINC00339	non-coding	357.199	293.045	207.913	404.082	348.315	213.646	135.331	180.243	205.266	405.85	388.43	218.698	161.017	400.238	251.476	172.706	515.841	189.556	553.097	217.879	183.78	485.917	213.238	310.547	212.319	216.548	216.636	163.2	212.804	119.691	265.471	316.788	84.2758	145.893	229.959	200.301	426.745	551.241	221.921	138.946	242.715	423.948	149.931	628.332	925.032	246.357	211.235
29774	POM121L9P	non-coding	8.6072	12.2762	22.1656	73.8404	40.4494	2.2117	3.3664	8.583	25.8344	43.8757	10.4683	7.7908	35.109	31.0195	14.9963	22.0079	4.8453	16.2767	6.1947	2.4604	2.8594	10.0026	8.4296	6.2794	6.4062	1.7558	2.6745	11.6	26.9316	16.8692	4.9327	10.7056	16.7312	4.0866	39.2263	11.0877	22.6368	10.9103	10.0326	29.4377	28.3742	0.7192	27.7649	21.4323	19.4564	18.3763	8.08
29797	POM121L8P	non-coding	0.7825	0.792	1.7732	2.2263	11.236	1.7693	1.0099	1.5894	4.6972	12.7971	2.2039	0.5565	3.632	1.2925	0	1.119	1.8636	0.6782	0	0.8201	0.7798	0.7897	1.2488	0.2854	0.3051	0	0	2	0.883	0	1.7937	0	0	0.8173	4.3185	0	1.2576	2.7276	2.6085	1.57	0.3834	0.3596	0.617	5.2274	1.024	0.8614	2.3086
29931	LINC00312	non-coding	240.219	39.6007	89.1056	47.8664	42.6966	127.391	18.5154	37.193	212.781	91.4077	114.05	63.9955	81.1138	40.0669	130.352	51.1031	70.4435	50.5256	61.9469	62.6025	78.7627	53.9616	43.3968	18.8383	42.4028	47.1139	27.5475	18.4	51.2141	10.0412	30.0448	24.8175	207.591	80.0981	40.6658	57.8487	89.7087	37.9132	76.2478	56.5205	9.2025	26.2496	42.5729	73.7062	14.3363	34.4555	71.1812
50652	PCA3	non-coding	0	0	0	0	37.0787	0	0	0	0	3.6563	0.551	0	0	0	0	0.373	0	0	0	0	0	0	0	0	0	0	0.5349	0	0	0	0	0	0	0	0.3599	0	0	0.8183	0	0	0	0.3596	1.851	0	0	0	0
51054	PLEKHA8P1	non-coding	47.7308	26.5324	101.962	42.3006	58.427	42.4638	47.1301	19.0734	56.8356	84.0951	120.661	38.3973	64.9718	71.5172	38.0674	44.3889	64.1073	53.5775	36.2832	50.5741	55.1079	40.8002	37.1527	34.5369	44.2332	24.5812	113.934	88.8	51.6556	92.3788	98.2063	27.2506	97.9086	53.1263	30.9492	89.9066	28.0864	89.737	60.3963	50.2404	65.5675	7.1917	35.7859	50.183	56.3211	72.3566	36.5525
51198	CDKN2A-AS1	non-coding	1.1737	0	0	0.3711	4.4944	1.7693	11.4459	3.8147	0	0	0.551	0	0.4036	0	0	2.2381	6.3362	1.3564	0	0	0.5199	0.2632	1.2488	1.1417	0	1.4632	0.2675	0.4	0	0.8033	0	3.4063	0	2.452	0.3599	5.3028	2.9344	1.3638	0	1.57	0.3834	0	0	0	0.3413	2.8713	1.5391
51214	IGF2-AS	non-coding	0.3912	1.188	0	1.1132	20.2247	0	212.385	0.6358	0	1.8282	1.1019	1.113	163.035	2.1541	0	0.746	1.4909	0.3391	0	0.2734	0	0.5265	3.4343	0	2.7455	0.5853	0.2675	0.8	0.883	1.2049	2.2422	0	0	202.681	3.9586	0.241	0.4192	6.5462	10.6346	3.5325	0	0	0.617	0	0.6827	1.1485	17.3144
51275	MAPKAPK5-AS1	non-coding	753.326	535.381	393.975	298	615.292	511.808	403.346	301.353	257.728	441.462	381.168	532.026	406.88	248.044	538.135	263.338	713.809	206.663	528.301	326.588	419.108	362.445	382.029	346.174	248.984	737.166	513.509	308.14	480.159	487.659	319.049	829.426	333.992	524.422	380.686	417.22	578.529	395.555	420.812	629.752	582.186	715.94	1257.27	2468.5	538.464	352.701	387.776
51352	WT1-AS	non-coding	7.4335	2.376	5.763	5.1948	32.5843	5.7503	4.713	0.3179	6.576	7.3126	5.5096	2.7824	10.0888	4.3083	2.3071	3.3571	0	5.7647	1.7699	1.3669	0.2599	24.2169	0.6244	1.4271	19.2186	0.5853	149.505	0.4	0	0	4.4843	0.4866	3.0984	0	2.879	2.6514	2.5152	4.6369	0.8026	1.9625	2.684	0	0	44.4328	1.7067	23.2575	10.0038
51716	CES1P1	non-coding	2326.68	155.235	539.51	5.1948	16.8539	7.5196	3.3664	1.5894	8.4549	10.9689	7.7135	7.2343	23.8095	136.572	109.588	657.254	7.4543	9.8338	5.3097	373.975	778.009	5.2645	145.176	1040.39	21.0489	12.8759	1.3373	670.4	970.419	483.181	3313	0.4866	19.8296	11.8512	74.8538	1.6873	30.1824	3.2731	3.8124	4.71	1.9172	2.1575	35.7859	36.5917	13.6536	190.08	5.0019
54064	LINC00160	non-coding	0	0	0	0	1.1236	0	1.0099	0	0	1.8282	0.551	0	0	0	0	0.746	1.1182	0	0	0	0	0.2632	0	0	0	0	1.0698	0	0	2.0082	0.4484	0	0	0	0	0	0.8384	0	0	0.785	0	0	0	4.7047	0.6827	0	0
54067	C21orf62-AS1	non-coding	2.3474	2.376	15.0726	1.4842	4.4944	5.308	5.3863	1.9073	4.6972	3.6563	7.1625	2.2259	6.0533	6.8932	2.3071	9.3254	5.9635	2.7128	3.5398	4.9207	8.8381	3.9484	6.8686	4.5669	3.6607	2.6337	9.8957	2.8	4.415	1.6066	0	2.4331	2.4787	3.678	7.5574	4.8207	1.6768	5.4551	1.0033	1.1775	0.7669	39.5541	1.234	14.114	11.2642	13.208	4.2324
54072	LINC00158	non-coding	0.3912	0	0.4433	0.7421	5.618	0	0.6733	0	0	1.8282	0.551	0	0.4036	0.8617	8.0749	0	0	0.3391	0.885	1.0935	0.5199	0	0.6244	0	0.9152	0.2926	0.2675	0	0.883	0.4016	0	0	0	0.4087	0	0.7231	0	0.2728	0.602	0	0.7669	0	14.191	0.5227	2.7307	1.4356	0
54075	CHODL-AS1	non-coding	0.3912	0	0	0.7421	1.1236	0	0	0	0	0	0.551	0	0	0	0	0.373	0	0	0	0.8201	0	0	0	0.2854	0	0	0	0.4	0	0	0.4484	1.9465	0.6197	0	0.3599	0	0	0	0.2007	0	0	0	0	0	0	0	0
54088	LINC00113	non-coding	0	0	0	0	0	0	0	0	0	0	0	0	0.4036	0	0	0	1.8636	0	0	0	0	0	0.3122	0	0	0	0	0	0	0	0	0	0	0	0.3599	0	0	0	0	0	0	0	0	0	0	0	0
54089	LINC00112	non-coding	0	0	0	0	2.2472	0	0	0	0	0	0	0	0	0	0	0	0	0	0	0	0	0	0	0	0	0	0.2675	0	0	0	0	0	0	0	0	0	0	0	0.8026	0	0	0	0	0	0	0	0
54090	LINC00111	non-coding	0	0	0	0	0	0	0	0	0	0	0	0	0.4036	0	0	0	0	0	0	0	0	0	0	0	0	0	0	0	0	0	0	0	0	0	0	0	0	0	0.2007	0	0	0.3596	0	0	0	0	0
54435	HCG4	non-coding	4.3036	5.5877	36.9544	21.1837	25.809	29.7202	100.973	1.7802	47.8546	131.371	118.865	7.1174	71.6546	90.1677	63.5265	33.3364	205.445	78.5961	16.4956	25.596	27.5305	22.019	102.604	72.2306	92.1667	8.7497	5.0816	8.8	25.2583	199.735	242.529	0.9732	17.196	26.416	56.0396	80.0362	238.977	39.4352	32.4274	72.4875	405.157	14.3366	0	37.4438	43.9817	20.6159	209.223
54441	STAG3L1	non-coding	82.5509	64.5491	40.7847	105.009	12.3596	8.4043	54.8729	63.8957	72.3362	21.9378	29.7521	138.008	89.9919	63.7623	179.955	13.0555	36.5263	24.4151	61.0619	4.9207	146.348	45.5383	23.7278	37.3912	56.7405	14.6316	169.832	134.4	103.311	72.2964	111.211	237.966	96.6692	63.7515	48.583	141.488	60.3647	54.8241	36.92	91.4532	26.8405	202.445	120.315	112.912	220.164	37.9011	110.427
54508	EPB41L4A-AS2	non-coding	14.0845	5.1481	8.8662	10.0186	21.3483	18.5779	14.4757	1.9073	17.3795	20.1097	20.9366	3.8954	18.1598	9.909	23.0712	14.9206	21.9903	23.0587	7.9646	7.3811	21.5753	17.1098	5.6197	3.996	7.0163	16.3874	22.4659	22.4	11.9205	6.4263	4.0359	1.9465	8.6754	28.1978	14.395	2.4104	9.6416	36.5494	32.1043	9.8126	4.2178	41.352	1.851	13.0685	2.3894	27.8516	16.1601
54581	SCAND2P	non-coding	173.709	247.108	204.367	209.276	229.214	130.488	195.253	186.283	288.875	272.395	212.672	157.485	290.557	193.441	148.809	182.405	189.34	183.791	262.832	249.317	214.973	232.166	235.404	172.114	198.897	202.502	274.94	200.4	210.155	220.906	135.874	179.075	254.067	353.494	209.087	333.112	250.262	382.405	258.239	305.368	258.052	408.486	323.924	453.738	259.418	188.07	297.422
54660	PCDHB18P	non-coding	7.4335	7.5241	12.4127	11.8738	24.7191	11.0583	8.7527	5.722	10.3337	12.7971	9.3664	4.4519	9.6852	6.0316	2.3071	6.7143	3.7272	9.4947	7.0796	20.7764	4.9389	4.4749	5.9319	1.998	7.9315	1.1705	1.8722	2.8	3.9735	7.6313	3.139	1.4599	19.8296	5.3126	17.6338	3.8566	10.0608	6.0006	2.8091	0.3925	0.7669	61.8483	1.234	3.1364	22.5284	10.6238	20.7772
54661	PCDHB17P	non-coding	19.9531	1.584	10.1962	0.7421	23.5955	5.7503	7.4062	3.8147	18.7886	10.9689	4.4077	1.113	6.8604	1.7233	0	4.4762	1.1182	2.7128	2.6549	16.6758	3.1193	1.5794	20.6057	6.2794	2.4405	2.0484	4.0118	1.2	8.83	8.0329	0	0.9732	84.2758	6.5386	4.6784	1.2052	36.8895	1.9093	0.8026	0	2.3006	6.4725	0	2.6137	5.1201	11.4852	49.6345
54718	BTN2A3P	non-coding	19.1706	32.4725	26.1554	32.282	74.1573	9.289	11.4459	16.2123	25.8344	38.3912	45.1791	10.5732	46.8119	21.9722	34.6068	14.9206	14.1633	19.6677	15.9292	34.7184	8.8381	12.1084	8.7418	14.2714	27.15	11.4127	54.0251	35.2	14.128	21.6889	31.3901	21.8978	31.6034	21.6592	29.5097	38.0838	43.5967	19.3657	19.6639	19.6252	32.2086	2.8767	18.5099	46.5238	23.8938	34.7427	17.3144
55000	TUG1	non-coding	2917.45	3517.73	4040.34	4115.77	3889.89	2146.63	3695	3344.51	5700	3177.33	6148.21	2977.18	4534.3	2448.82	3460.68	5283.02	2135.67	5138.69	4517.7	3396.66	7830.26	5080.02	4691.85	3555.87	3175.33	2616.43	8031.56	4729.6	3801.77	8053.82	6520.63	4256.93	4197.68	4640.78	4063.7	4360.59	2032.28	5995.74	4589.52	3010.89	2508.05	2051.42	1378.99	1142.18	4300.2	3005.67	3181.61
55018	LINC00483	non-coding	0	0	0	0	1.1236	0	0	0	0	0	0	0	0	0	0	0	0.7454	0	0	1.3669	0	0	0	0	0	0	0	0	1.3245	0	0	0	0	0	0	0.4821	0	0.8183	0	0	0	0.7192	3.085	2.6137	0	0	0
55056	FLJ10038	non-coding	60.9742	149.651	195.128	350.019	187.438	143.868	93.9303	91.4981	211.687	271.627	261.824	77.0785	233.37	161.93	220.099	325.855	135.013	184.483	318.832	131.881	220.359	212.377	137.727	137.074	115.83	165.367	410.374	118.276	264.093	158.12	83.1076	184.832	109.199	555.431	165.873	178.958	141.803	253.639	281.126	106.639	123.217	630.475	171.495	140.068	197.233	217.076	225.19
55073	LRRC37A4P	non-coding	163.537	157.611	167.301	424.72	276.236	69.0036	140.38	82.6003	237.949	211.883	326.171	84.0289	113.398	107.276	73.8278	226.723	61.4983	908.606	148.673	249.267	70.1846	82.1269	111.071	267.447	89.3815	116.456	587.39	125.2	312.631	140.496	129.525	499.411	312.936	611.218	95.3666	174.826	83.4207	188.99	102.495	48.2779	163.344	194.103	36.4029	47.5693	140.13	152.704	141.978
55370	PPP4R1L	non-coding	61.8153	76.8253	81.5693	73.4694	82.0225	31.8478	51.8431	38.1467	85.0185	54.8446	132.231	99.054	73.8499	43.0826	96.8989	59.6825	69.6981	76.6361	51.3274	27.8841	43.4104	36.3253	93.35	111.032	118.667	32.7749	123.295	36	72.8477	98.8051	85.6502	2.9197	59.4888	21.2505	77.3729	141.488	120.31	58.37	101.931	85.9582	105.061	35.5987	78.3588	166.754	100.354	61.4457	42.7087
55384	MEG3	non-coding	13.302	39.6007	50.0942	123.933	277.528	15.0393	48.4767	46.7297	87.3671	259.598	188.43	46.1881	564.165	70.2247	31.1461	56.3254	19.3813	83.079	12.3894	7.9278	4.1591	49.7499	25.2888	3.4251	14.9478	2.0484	14.9773	29.2	26.9316	37.3531	59.1928	16.0584	38.4198	9.3993	74.1341	24.1036	30.1824	1032.66	39.9298	912.177	13.4202	50265.4	41.9559	14.6367	39.2541	45.9407	156.214
55449	DHRS4-AS1	non-coding	672.144	562.86	368.525	661.451	1140.12	446.524	495.701	200.159	710.327	503.199	831.107	266.739	256.138	626.853	423.737	453.255	1465.2	422.187	712.726	526.561	840.156	513.638	561.717	617.942	451.917	737.833	541.466	176.32	335.589	209.503	43.4978	200.258	252.152	599.162	780.146	523.536	556.839	459.704	226.601	485.656	392.726	1216.41	215.079	684.266	871.308	450.185	637.314
55472	RBM12B-AS1	non-coding	4.3036	3.1681	6.6497	5.5659	7.8652	2.654	3.7031	5.4041	3.288	0	9.3664	3.3389	10.8959	2.585	9.2285	5.5952	1.8636	11.5293	8.8496	3.8272	7.0185	11.8452	4.3709	15.4132	5.186	3.5116	19.7914	9.6	4.8565	12.0494	11.2108	16.545	9.2951	10.2166	3.5987	14.2212	8.384	11.4558	6.6215	7.4576	4.2178	3.9554	3.085	4.1819	2.3894	1.7228	11.9277
55539	KCNQ1DN	non-coding	0	0.396	0	0.7421	6.7416	0	0	0	0	0	0	0	0.4036	0.4308	0	0.373	0	0.3391	0	0.8201	0.2599	0	0.3122	0	0	0	2.942	0	0	0	0	0.4866	0.6197	0	0	0	0	0.2728	0	0	0	0	0	0	0.3413	3.1584	0.3848
55545	MSX2P1	non-coding	0.3912	0.396	0	1.1132	13.4831	0	7.0695	1.5894	0	7.3126	2.7548	1.6694	2.4213	3.0158	2.3071	0.746	0	1.3564	0	1.3669	0.5199	0.2632	1.561	0.8563	2.4405	0.2926	0.2675	0.8	0	0	1.7937	0	4.9574	0.4087	1.4395	0.241	0.8384	4.0914	1.2039	0.3925	1.5337	8.63	5.553	0	102.402	2.297	5.7715
55592	GOLGA2P5	non-coding	31.2989	23.3644	104.621	89.0538	126.966	23.4435	12.1192	57.8558	80.7911	190.128	54.5455	37.2844	107.345	71.5172	18.4569	70.873	56.653	50.8647	54.8673	51.3942	42.1107	49.4867	38.0893	25.1177	53.6899	35.116	586.253	62.8	100.662	135.757	46.1883	173.236	223.083	29.4238	35.6275	44.3507	89.2895	560.515	71.2315	28.6527	77.454	177.274	143.144	275.483	51.5423	77.8121	52.3278
55853	IDI2-AS1	non-coding	3.8576	11.4525	28.8729	17.3024	5.7753	1.8401	1.7404	72.0591	7.445	9.9817	10.5675	7.3511	16.7272	5.3983	12.8968	5.6959	7.8345	10.1797	5.4336	5.8967	5.4484	8.2522	8.9166	7.7037	9.0571	6.1072	15.8358	19.832	12.8521	95.4353	30.3901	40.5645	24.0062	12.1496	4.0486	15.7517	13.4647	13.3187	16.5979	6.7157	40.786	14.8076	11.2849	17.862	14.5855	7.0806	5.91
55855	FAM45BP	non-coding	308.685	275.621	199.047	274.212	169.663	174.278	250.799	187.555	217.009	142.596	178.512	495.27	169.492	274.006	213.408	221.571	352.218	162.089	182.301	266.812	167.143	186.102	204.496	137.291	218.115	255.469	87.9914	317.6	157.616	91.5755	265.919	118.248	122.076	142.215	273.864	253.088	501.362	284.485	101.329	189.186	161.81	164.329	183.865	100.889	214.703	147.297	262.024
55999	NXF4	non-coding	0	0	0	0	2.2472	0	0	0	0	0	0	0	0	0	0	0	0	0	0	0	0	0	0	0	0	0	0.2675	0	0	0.4016	0	0	0	0	0.3599	8.1952	0	3.2731	0	0	0.3834	1.7979	0	0	0	0	0
56120	PCDHGB8P	non-coding	0	0	1.3299	1.8553	8.9888	3.0963	2.3565	4.1326	1.8789	3.6563	6.0606	0.5565	1.2107	0.4308	0	0.373	0	0.6782	2.6549	0.8201	1.8196	0.2632	3.7465	0	0.6101	0.2926	4.8141	0.4	1.3245	3.6148	0.4484	0	7.4361	4.0866	0.7197	0.4821	0.8384	0.5455	0.8026	3.14	1.1503	1.7979	0	0	0.6827	1.1485	0.7695
56286	DAD1P1	non-coding	0.3912	0	0.4433	0.3711	5.618	0	0	0	0.9394	1.8282	0.551	1.113	0.8071	0	0	0	0	0.3391	0	0.2734	0.2599	0	0	0	0.3051	0	0	0	0	3.6148	0	1.9465	0	0	0	0.241	0	0	0.4013	1.9625	0.3834	0	0	0	0	0	0
56604	TUBB7P	non-coding	4.6948	1.98	1.7732	2.2263	8.9888	0.8847	3.7031	2.5431	6.1063	1.8282	1.1019	1.6694	0	2.1541	0	5.2222	0	0.6782	1.7699	1.3669	1.0398	1.5794	4.3709	6.8503	1.5253	4.3895	6.9537	2.8	4.8565	6.0247	1.7937	6.8127	10.5345	3.2693	1.7994	45.3149	2.5152	1.6365	2.4078	1.1775	1.1503	1.4383	0	1.0455	3.4134	2.0099	7.3105
56651	LINC00470	non-coding	25.8216	1.188	41.228	33.0241	112.36	61.0417	69.3486	2.5431	13.6218	5.4845	56.7493	40.6233	49.6368	0	11.5356	8.9524	0	2.0346	21.2389	0	44.4502	31.0608	25.601	3.996	26.5399	42.1391	87.9914	21.6	0	0.8033	3.5874	0	57.0101	150.797	22.3122	0.9641	30.6016	0.8183	95.9117	157.394	1.1503	0.3596	33.3179	18.8186	0	6.604	47.3259
56662	VTRNA1-3	non-coding	0	0	0	0	0	0	0	0	0	0	0	0	0	0	0	0	0	0	0	0	0	0	0	0	0	0	0	0	0	0	0	0	0	0	0	0	0	0	0	0	0	0	0	0	0	0	0
56663	VTRNA1-2	non-coding	0	0	0	0	0	0	0	0	0	0	0	0	0	0	0	0	0	0	0	0	0	0	0	0	0	0	0	0	0	0	0	0	0	0	0	0	0	0	0	0	0	0	0	0	0	0	0
56664	VTRNA1-1	non-coding	0	0	0	0	0	0	0	0	0	0	0	0	0	0	0	0	0	0	0	0	0	0	0	0	0	0	0	0	0	0	0	0	0	0	0	0	0	0	0	0	0	0	0	0	0	0	0
56969	RPL23AP32	non-coding	0.3912	0	0	0.3711	5.618	0	0.3366	0.3179	3.288	9.1408	0	0	0.8071	0.8617	1.1536	1.119	0.3727	0.3391	1.7699	0	0	0	0	0	0	0	0.2675	0	0.883	0.8033	0.4484	0.4866	0.6197	0.8173	1.0796	0	0.4192	0.2728	1.0033	0	2.3006	1.0787	2.468	0	1.024	0	0.7695
57061	HYMAI	non-coding	2.3983	5.6787	13.3969	3.7106	26.6966	0.8979	3.0736	0	1.9117	0	0.551	0.5565	23.1881	0.8746	0	0.7572	0	2.8281	0	2.2389	3.426	2.4006	0.9554	0.8734	0.3203	1.5012	9.2752	4.072	0.4547	2.0444	10.9865	8.3114	6.3641	30.9767	1.8677	1.9789	1.2576	3.3304	5.0685	4.7925	8.8804	0.3596	0.617	54.3387	6.1919	0.5857	3.9669
57212	TP73-AS1	non-coding	37.1674	280.373	448.631	307.978	642.697	182.683	70.6952	115.076	454.685	723.949	498.623	143.016	746.57	361.894	245.708	297.666	272.829	372.33	419.469	300.437	318.17	457.489	232.594	397.888	470.702	51.796	596.684	356.8	509.492	441.811	471.749	79.3187	179.706	306.906	410.256	409.521	253.616	869.821	872.235	365.421	294.095	858.324	295.542	324.621	437.257	434.714	310.119
57291	DANCR	non-coding	5447.97	2535.63	251.801	414.1	1425.84	1959.53	575.997	1073.51	407.243	915.905	764.738	654.981	455.206	337.768	944.765	582.278	1427.13	598.508	2115.04	628.486	1078.76	2430.9	740.556	1050.38	331.291	3008.85	365.873	1272.4	726.711	2437.59	669.507	1297.32	2170.1	789.538	474.314	1706.06	1715.36	496.69	234.964	1108.82	315.567	393.024	2744.41	10387.3	819.557	930.587	1209.31
57653	LOC100499484-C9ORF174	non-coding	5.0861	16.6323	50.5375	41.9295	57.3034	116.775	27.2681	16.8481	50.7293	226.691	45.73	26.1547	106.134	129.248	33.4532	248.428	24.972	36.9617	23.8938	28.4308	43.6704	49.7499	20.6057	15.1277	126.293	55.6003	131.051	30	49.0066	20.8856	32.7354	89.0511	39.6592	11.0339	99.3252	78.0958	17.6064	54.5514	19.4633	36.1103	45.6288	119.022	31.4669	33.4553	68.268	45.9407	50.7888
58483	LINC00474	non-coding	0	0	0	0	1.1236	0	0	0	0	0	0	0	0	0	0	0	0	0	0	0	0	0	0	0	0	0	0	0	0	0	0	0	0	0	0	0	0	0	0	0	0	0	0	0	0	0	0
60439	TTTY2	non-coding	0	3.5641	0	0	4.4944	0	0	0	0	0	0	0	0	0	0	0	0.3727	0.3391	0	0.2734	1.8196	0	0	0	0.9152	0	0	0	0	0.4016	0	5.3528	0	0	0.7197	0	0	0	0	0	0	0	0	78.4109	0	0.8614	0
60467	BPESC1	non-coding	0	0	0	0	22.4719	0	0	0	0	0	0	0	0	0	0	0	0	0	0	0.2734	0	0	0	0	0	0	0	0	0	0	0	0	0	0	0	0	0	0.2728	0	0	0	0	0	0	0	0.2871	0
60674	GAS5	non-coding	1955.4	1911.13	1761.28	1934.32	978.652	2134.25	5442.85	2240.48	1522.35	1592.32	903.03	3170.84	2724.37	2662.08	5670.9	729.619	3230.34	1790.78	1812.39	1576.54	941.253	570.677	4542.3	1229.91	1939.85	1424.83	732.014	1475.2	2772.63	2681.39	1244.84	4657.91	2531.37	1200.65	2189.47	3145.53	1905.26	1007.29	611.989	3112.55	3233.9	1072.28	16092.5	8489.28	2624.22	1216.28	1158.14
63914	LINC01590	non-coding	1.5649	0.796	7.6072	10.1224	15.809	0.46	7.2412	4.3869	15.5805	12.7971	5.5702	5.1809	20.0282	3.899	5.0872	7.8557	0.3727	5.4866	1.8053	1.7633	6.7169	8.5496	1.8826	4.1558	3.3251	10.6665	28.1519	6.848	5.6071	4.2253	3.0628	8.1265	9.3633	2.877	7.5538	6.9057	0.4192	9.8274	9.529	14.5226	3.8612	9.4642	19.0467	20.1307	22.2212	3.5518	14.9942
64002	PCGEM1	non-coding	0	0	0	0	7.8652	0	0	0	0	0	0	0	0	0	0	0	0	0	0	0	0.2599	0	0	0	0	0.2926	0	0	0	0	0	0	0	0	0	0	0	1.091	0	0	0	0	0	0	0.6827	0	0
64150	DIO3OS	non-coding	0.7825	1.188	0.4433	0.7421	7.8652	3.0963	6.4501	0.3179	7.088	1.8282	2.7548	0	2.4213	0.8617	0	0.373	0.3727	0.3391	0	0	0	0.2632	2.1855	0	1.5253	1.1705	0	0	0	0.4016	0	0	0.6197	0.474	4.6784	0.241	1.6768	0.2728	0	27.4752	0	0.3596	12.957	0	0	2.297	4.6172
64396	GMCL1P1	non-coding	5.4773	9.5042	5.3197	2.5974	22.4719	0.8847	7.4062	3.1789	2.3486	0	22.0386	7.2343	6.0533	6.8932	2.3071	3.7302	5.5908	2.3737	3.5398	4.374	8.0582	4.4749	2.8099	4.5669	3.9657	7.6085	10.4306	7.2	2.649	2.4099	2.2422	8.2725	6.1967	4.0866	3.2389	8.1952	23.056	10.6375	4.2137	0.785	3.0675	5.3937	3.702	1.0455	5.4614	2.8713	7.3105
64433	LINC00244	non-coding	0	0	0	0.3711	4.4944	0	0	0.9537	0	0	0	0	0	2.1541	0	0	0	0	0	0	0.2599	0.2632	0	0	0	0	1.8722	0.4	0.4415	1.6066	0.8969	0.9732	1.2393	2.0433	0	0.241	0	0.5455	0.4013	0.785	0	0.3596	3.702	0	0.3413	0	0
64493	LINC00235	non-coding	1.9562	0.396	1.7732	0	0	0.8847	1.6832	0.3179	2.3486	0	1.6529	1.113	3.632	0.8617	0	2.2381	0.7454	2.3737	3.5398	1.6402	7.5383	1.8426	2.1855	0.2854	0	2.3411	6.4188	1.6	2.2075	0	0.4484	4.8662	0.6197	0.4087	1.0796	1.4462	0	1.3638	0	0	0	2.5171	0	3.1364	3.4134	1.1485	3.8476
64593	RBMY3AP	non-coding	0	0	0	0	0	0	0	0	0	0	0	0	0	0	0	0	0	0	0	0	0	0	0	0	0	0	0	0	0	0	0	0	0	0	0	0	0	0	0	0	0	0	0	0	0	0	0
64595	TTTY15	non-coding	19.5618	668.063	20.3923	0	34.8315	0	510.688	13.6692	93.9431	148.08	192.838	0.5565	65.7789	0	0	1.119	27.9538	133.605	0	53.5812	454.38	17.373	329.067	0	295.295	14.0464	0	14	0	64.6651	3.5874	440.389	0	0	154.746	96.6556	42.3391	0	0	271.612	483.896	0	440.537	699.425	0.6827	173.426	0
64940	STAG3L4	non-coding	346.635	257.404	176.438	223.748	129.214	52.6374	107.726	318.843	94.4128	74.9543	125.62	224.263	104.116	194.303	407.206	76.0952	209.094	66.8023	400	88.0262	126.592	148.46	263.191	142.714	63.4517	260.736	163.68	97.2	229.139	259.865	73.5426	108.516	656.236	133.633	186.055	122.447	364.284	77.1902	112.165	235.502	128.451	766.631	325.158	583.9	420.872	93.8913	232.397
65996	CENPBD1P1	non-coding	398.67	607.87	594.038	415.584	940.449	903.682	876.62	397.997	866.156	500.914	849.036	324.986	649.314	656.149	1350.82	852.341	527.395	558.833	445.133	711.044	1293.22	714.925	764.596	1129.73	782.775	577.072	791.388	720.4	1261.81	374.335	589.686	483.698	325.329	995.505	831.669	798.795	712.22	944.83	709.707	916.495	547.163	583.963	300.478	572.922	436.233	706.625	941.516
78998	RHPN1-AS1	non-coding	27.7778	11.0882	18.1758	19.666	148.315	94.6589	23.5651	24.4775	32.8801	31.0786	71.0744	22.8158	61.3398	30.5887	13.8427	35.0635	135.296	9.4947	100.885	56.5883	19.4957	127.928	38.4015	62.2235	45.1483	6.7306	117.144	28	37.0861	161.06	20.6278	12.1655	17.3509	40.4577	19.0733	58.0898	72.5215	135.287	44.3441	66.7255	49.0798	20.1366	6.17	41.8191	48.4703	29.8615	45.4021
79100	LINC00626	non-coding	1.1737	17.0283	73.5897	3.7106	13.4831	25.6552	3.7031	9.5367	0.4697	0	15.427	11.1297	0	1.7233	139.581	32.4524	5.5908	40.3527	16.8142	14.7622	5.7187	90.5501	174.212	42.5289	1.5253	132.27	1.0698	5.2	66.6667	0.4016	2752.02	3.4063	79.3184	2.8606	8.2771	72.552	38.1471	13.0923	134.236	0.785	0	0	5.553	2.6137	0	7.4654	62.7164
79104	MEG8	non-coding	0	0	0.4433	0.3711	0	0	0.3366	0	0	0	0	0	0	0	0	0.373	0.3727	0.3391	0	0	0	0.5265	0	0	0	0	0	0	0	0.4016	0	0	0	0	0	0	0.4192	0.8183	0	7.0651	0	10.0683	0	0	0	0.2871	0.3848
79136	LY6G6E	non-coding	3.2238	0.095	0	0.3711	0	0	0	2.861	0.4697	0	0	5.5648	0	0	0	0.373	0.3727	0.3391	1.7699	1.6402	0	0	2.2416	0	0.3051	0	0.8024	0.8	0	0	0	1.4599	0.6197	4.0008	0.3599	0.241	0	0.7555	0	0	0	0	2.468	0	29.7068	0	4.3324
79166	LILRP2	non-coding	1.1737	0.792	0.4433	0.3711	43.8202	3.5386	0.3366	0.3179	0.4697	3.6563	1.1019	0	0.4036	1.2925	3.4607	0	0.7454	0.6782	0	6.561	2.3395	0.2632	0.6244	0	1.5253	0.8779	0.2675	0.8	0	1.2049	1.3453	1.9465	0.6197	0	1.0796	0.9641	3.3536	0.5455	0.4013	10.2051	1.1503	0.3596	1.851	0.5227	0	11.198	0
79315	OR7E91P	non-coding	9.3897	9.5042	3.1032	4.8237	5.618	14.1546	234.977	54.3591	11.7429	0	4.4077	3.8954	19.774	0.8617	1.1536	2.9841	1.4909	3.391	11.5044	15.5823	47.8295	4.2116	17.1714	0.5709	26.845	167.679	10.9655	13.2	1.766	23.6972	4.9327	3.4063	29.7444	42.501	20.8727	1.4462	1.6768	4.3641	32.7063	4.3175	0	10.7875	0	0	6.4855	4.8812	11.1581
79469	DLEU2L	non-coding	5.4773	3.5641	9.3095	5.9369	10.1124	1.327	2.0199	5.722	6.576	1.8282	8.8154	3.8954	12.9136	2.585	2.3071	3.7302	5.218	3.0519	6.1947	1.6402	1.2997	1.0529	1.8732	1.998	2.4405	2.9263	16.8494	2	1.766	2.4099	3.139	4.8662	8.0558	5.7213	2.1592	4.8207	6.288	4.6369	4.2137	8.6351	6.9018	2.8767	7.404	2.091	12.2882	3.4456	2.3086
79667	KLF3-AS1	non-coding	7.4374	21.7883	15.9592	23.7774	23.6404	21.7008	7.4264	24.8558	39.4561	32.9068	22.6391	10.0445	25.9241	26.7112	19.6451	17.1774	28.3265	27.4975	12.3894	19.4095	27.5929	10.0211	20.3403	3.4251	5.491	36.0114	40.6713	13.604	30.4857	5.2335	16.6143	24.8662	13.0442	61.3895	20.8871	12.0615	11.3268	188.589	7.6308	5.1025	34.1258	78.8278	36.4029	6.7956	13.9949	7.4769	17.322
79686	LINC00341	non-coding	11.7371	27.7205	27.4853	107.607	78.6517	17.2509	80.4578	10.1725	185.068	246.801	112.397	13.9121	135.19	79.2721	33.4532	49.2381	12.2997	107.494	33.6283	47.8403	26.5142	374.836	36.216	12.8443	151.918	6.1453	34.7687	21.6	38.8521	45.3861	58.296	10.7056	27.2657	16.3465	38.5065	18.5598	24.7328	25.3664	31.3017	75.7531	17.638	8.63	117.23	11.5003	34.8167	111.693	62.3317
79804	HAND2-AS1	non-coding	0	0.396	0.8866	0.3711	30.3371	0.4423	2.6931	0	3.7577	0	0	2.7824	0	0.8617	4.6142	0.746	1.1182	0.3391	0	0	0.2599	0.5265	0	0	26.845	0.5853	0	0	0	0	0	0	0.6197	2.452	0.3599	2.1693	1.2576	12.8196	1.4046	0	0	150.665	0	0	28.3312	0.2871	11.1581
79854	LINC00115	non-coding	17.2144	17.4243	28.3719	44.898	20.2247	11.0583	14.8123	18.4376	12.2126	27.4223	31.405	26.7112	27.845	23.2646	28.839	12.3095	14.1633	12.8857	21.2389	7.9278	7.7983	8.6865	11.8639	10.2754	11.8972	20.4843	28.8847	26.4	22.0751	55.4273	38.1166	40.3893	34.7018	40.4577	8.9969	18.0777	14.2528	21.5478	14.447	29.8302	32.592	19.7771	21.5949	158.913	34.4753	26.703	13.4667
79857	FLJ13224	non-coding	1.5649	1.584	1.3299	1.8553	11.236	2.654	6.0596	2.2252	5.1669	0	3.8567	2.2259	1.6142	3.0158	3.4607	3.3571	2.609	2.0346	9.7345	1.6402	7.7983	1.8426	3.7465	0.8563	0.3051	3.8042	4.5467	0	3.9735	3.6148	4.9327	3.4063	2.4787	4.4953	3.2389	1.4462	6.7072	12.0013	7.4241	0.3925	1.5337	6.8321	0	2.091	4.0961	1.4356	5.7715
79940	LINC00472	non-coding	1.1737	2.772	7.093	10.3896	14.6067	4.4233	1.3466	1.2716	14.5612	9.1408	3.3058	2.7824	23.0024	6.4624	5.7678	10.0714	5.218	19.6677	11.5044	4.1006	28.5937	6.0542	2.1855	3.7106	57.6557	12.2906	0.2675	1.2	7.947	2.0082	19.2825	1.9465	13.0132	2.452	14.7548	4.5797	14.672	21.275	10.8352	7.8501	105.445	8.9896	0	20.3868	1.7067	8.901	6.541
79963	ABCA11P	non-coding	75.4773	164.572	44.7922	57.7699	117.404	100.312	70.951	66.833	66.0373	81.9561	100.275	62.0145	125.161	119.042	61.6231	43.3258	63.4476	47.9112	117.195	73.111	38.2168	109.953	105.282	44.8123	78.0334	93.7391	148.561	38.332	63.766	63.8819	33.139	112.827	47.7459	49.4892	93.3909	106.762	60.8594	185.055	151.5	46.6765	141.457	491.424	427.487	161.788	50.5115	59.7861	80.3001
79970	ZNF767P	non-coding	124.413	207.112	265.987	318.367	80.8989	61.9264	40.3972	105.857	123.535	252.285	182.369	145.242	274.011	153.374	86.5169	79.4523	96.9064	158.698	131.858	122.471	192.618	157.936	143.303	72.2135	114.396	94.8131	311.313	215.2	379.249	241.39	632.287	260.341	822.308	454.025	109.042	219.102	87.1935	244.117	140.858	101.658	95.4755	384.034	228.289	93.5703	205.145	138.971	31.9354
79986	ZNF702P	non-coding	153.756	36.8286	19.0624	281.262	69.6629	191.087	14.8123	76.9292	95.3523	54.8446	305.234	13.3556	209.04	204.212	48.4495	42.1508	370.108	48.491	84.0708	55.2214	12.2173	63.701	60.256	13.4152	41.4877	20.4843	159.401	4.8	22.9581	35.3449	1.3453	0	25.4067	89.906	141.43	6.0259	151.331	84.5546	145.473	92.6308	218.175	111.111	659.571	46.001	134.488	109.396	173.143
79992	AGPAT4-IT1	non-coding	1.1737	3.5641	6.2064	20.4082	5.618	0.8847	1.0099	5.0862	15.5006	5.4845	4.9587	3.3389	20.1776	4.3083	1.1536	5.9683	0.3727	13.5639	0.885	0.2734	0.5199	0.7897	2.8099	0.8563	2.1354	2.3411	25.4079	1.6	3.0905	3.6148	0.4484	0	1.2393	5.7213	2.879	5.5438	0.8384	4.3641	2.0065	22.7652	7.2853	51.4204	0.617	19.3413	2.7307	3.7327	7.3105
80035	ANP32A-IT1	non-coding	0	1.584	1.3299	1.4842	19.1011	0	1.3466	0.3179	0.9394	0	5.5096	0	4.0355	1.7233	3.4607	2.6111	0	6.4429	2.6549	1.6402	2.0795	2.369	0.3122	2.2834	0.9152	0.2926	8.0235	4	2.2075	1.2049	0.4484	2.4331	1.859	4.4953	0.3599	7.9542	0.4192	4.3641	0.8026	1.9625	0.7669	1.7979	3.702	2.091	1.3654	1.4356	0.7695
80039	FAM106A	non-coding	1.1737	0	1.7732	3.7106	25.8427	0.4423	0	0	1.4091	0	1.1019	1.113	2.4213	4.3083	1.1536	1.119	0	0.6782	0	1.0935	1.2997	3.1587	3.4343	6.2794	0.6101	0	1.3373	0.8	3.532	0	5.8296	5.8394	3.718	0.4087	3.2389	1.2052	2.5152	0.5455	2.8091	2.355	0.3834	6.4725	1.851	0	1.024	2.8713	5.3867
80054	CEBPA-AS1	non-coding	41.8623	56.629	160.479	53.0612	65.1685	59.7147	204.343	15.5766	66.6996	34.7349	75.4821	82.3595	81.9209	22.8338	87.6705	71.246	25.3448	56.9685	113.274	80.3718	134.39	180.837	72.1199	259.455	46.6736	67.3056	117.678	56.8	275.055	41.3696	78.4753	134.793	76.8397	218.226	62.6181	31.8168	20.5408	62.1885	36.92	33.3628	44.0951	1.0787	93.1667	56.9786	3.0721	25.5545	202.77
80069	LINC00574	non-coding	0	1.2118	0	1.4842	14.1124	0.4556	4.3764	0	0	0	0.6061	1.113	2.8773	9.0646	0	0	1.6139	1.9091	0.9292	2.0202	0.8526	1.0529	3.2032	0.5823	2.5289	0.2926	6.6943	0.8	0.468	0	0.4484	0	0.6878	0.4087	1.5187	0	2.7164	0.2864	0.2007	0.3925	1.2922	30.1906	9.329	0	16.5345	2.0932	2.3817
80072	HEXA-AS1	non-coding	5.0861	3.9601	4.8764	23.3766	17.9775	10.1736	10.0993	6.3578	13.152	5.4845	7.7135	2.7824	20.1776	17.2331	11.5356	19.3968	8.9452	22.7196	13.2743	13.6687	11.9574	10.5291	4.9953	7.7066	3.9657	4.3895	14.4424	6.8	10.1545	22.8939	7.1749	1.9465	5.5771	20.8418	12.2357	6.508	10.8992	8.1827	2.6085	9.0276	7.6687	19.0579	1.234	5.2274	13.3123	4.8812	6.1562
80086	TUBA4B	non-coding	6.651	2.376	0.4433	6.679	40.4494	181.356	0	12.3977	0.9394	195.612	1.1019	31.7195	2.0178	145.619	0	155.548	27.9538	1.0173	2.6549	2.7337	8.8381	46.0648	4.0587	0.5709	14.0326	63.794	1.0698	0.4	0.883	0.8033	31.8386	3.4063	8.0558	1.6347	135.313	20.006	13.4144	4.0914	0.602	3.14	8.819	43.1499	4.319	2.091	4.0961	4.0198	40.7849
80094	BIN3-IT1	non-coding	0	0.396	1.3299	1.1132	12.3596	0	0	1.9073	0.9394	0	0.551	1.6694	0.4036	0	0	0.373	0.3727	2.3737	0	0.5467	1.2997	0	0.3122	0	0.3051	0.2926	0.8024	0.4	0.4415	0.4016	0.4484	0	0	1.226	0.3599	1.4462	0.4192	1.3638	0.8026	1.1775	1.1503	0.7192	0.617	0	0	0.5743	0.3848
80154	GOLGA2P10	non-coding	1273.87	415.411	787.765	307.236	1464.04	466.217	1662.68	630.692	760.939	793.419	979.614	316.082	1029.86	320.104	288.39	1239.9	590.384	1243.81	491.15	948.059	1263.06	1177.42	770.528	313.972	271.5	428.122	1175.72	1313.6	862.252	1395.32	706.278	423.358	607.901	4282.39	201.889	1394.15	1376.65	1600.26	1315.48	1181.04	511.503	532.902	198.673	1148.46	358.407	321.585	801.847
80161	ASMTL-AS1	non-coding	7.0423	60.2326	29.3472	157.236	29.2135	14.1546	8.7527	55.3127	83.6094	126.362	84.8871	30.6066	171.509	28.0253	23.0712	16.0546	24.9832	37.3008	44.2478	9.0213	27.8139	12.119	37.7771	12.5589	10.9881	22.2401	116.654	120.268	167.329	184.934	134.22	123.669	334.934	29.8324	34.2168	34.9503	9.2224	20.7295	15.6609	59.7429	65.184	280.561	245.565	72.6607	32.796	33.3214	11.9277
80215	RUNX1-IT1	non-coding	0	0.396	0.8866	1.1132	7.8652	0	0	0.3179	0	1.8282	1.6529	1.113	0.4036	0.4308	0	0.373	0	1.3564	0	0.2734	0.2599	0	0.3122	0	0.3051	0	0.2675	0.4	0	0	0	0	0	0	0	0.4821	0	4.3641	0	1.57	0	0	0.617	2.6137	0.3413	1.4356	0.7695
80307	FER1L4	non-coding	77.856	142.562	146.293	126.531	110.112	23.4435	22.2185	92.8237	144.203	1510.05	731.13	62.8826	130.347	330.013	108.434	26.4841	51.8077	69.8542	107.08	145.981	14.5568	155.041	33.4062	25.6886	62.8416	7.3158	127.039	128.4	215.452	538.608	42.6009	216.058	153.679	13.4859	169.141	71.3468	14.672	129.832	15.0489	25.5127	188.65	6.1129	138.825	42.3419	85.6763	295.456	63.486
80316	PPP1R2P9	non-coding	0	0	0	0	2.2472	0	0.3366	0	0	0	0	0	0	0	0	0	0	0	0	0	0	0	0	0	0	0	0	0	0.4415	0	0	0	0	0	0	0	0	0	0	0	0	0.3596	4.319	0	0	0	0
80350	LPAL2	non-coding	1.9562	3.5641	0.4433	5.1948	20.2247	1.7693	1.6832	0.6358	10.8035	1.8282	6.0606	1.6694	5.2462	0.8617	6.9214	2.2381	0.3727	5.4256	12.3894	2.4604	14.8167	0.5265	6.2441	2.8543	1.8303	2.9263	10.9655	1.2	7.947	4.4181	1.7937	2.9197	4.3377	5.3126	3.5987	2.1693	0.8384	15.8199	4.615	0	9.2025	0	0.617	6.2729	3.7547	5.7426	15.0058
80862	ZNRD1ASP	non-coding	33.3959	32.6785	25.8318	19.7848	63.3258	8.4176	25.255	8.6625	30.6255	23.8757	40.6777	16.355	21.4891	20.5073	11.6279	29.4869	42.937	19.7355	47.1239	23.1411	37.3148	13.8563	25.5198	13.8005	16.2504	21.5349	49.5881	11.04	18.8035	23.171	23.3587	40.0341	18.2184	37.9322	20.6172	26.8611	14.8397	39.056	18.8834	29.3082	21.5836	44.8723	18.4236	68.4893	49.8971	16.1453	35.329
80868	HCG4B	non-coding	1.9718	13.0563	4.0253	18.7013	22.4382	1.7693	1.8448	0	19.7093	12.9799	14.7052	1.113	8.5028	1.943	8.1211	3.7936	4.6068	3.2452	20.6106	2.9196	4.3774	2.2322	6.1349	6.1082	1.9768	3.058	2.383	2.836	0	9.2057	3.7803	2.4964	11.6809	14.9081	2.5983	3.4396	1.1276	5.8206	7.8194	7.5361	6.1963	21.8411	1.851	21.4114	8.3253	12.3207	8.5571
81571	MIR600HG	non-coding	47.3396	81.9734	128.117	371.058	219.101	39.3675	52.8531	174.521	87.3671	146.252	142.7	55.6483	143.261	46.0984	68.06	258.873	7.8271	164.802	92.0354	209.404	346.504	66.3332	102.092	198.944	59.486	58.8192	208.077	429.2	513.907	184.757	160.538	370.803	542.835	178.995	51.462	31.8168	7.9648	180.019	37.3213	45.5304	11.8865	236.606	130.187	63.7742	53.9317	107.674	86.187
81698	LINC00597	non-coding	0	0	0	0.7421	15.7303	0	0	0.3179	0.4697	0	0	0	0	0.4308	1.1536	0.746	0	0	0	0.2734	0.2599	0	0	0	0.3051	0	0.8024	0.4	0	0	0	0	0	0	0	1.2052	0	0.5455	0.4013	0.785	0.7669	0	0.617	0.5227	0.6827	0	0
81854	ZNF205-AS1	non-coding	9.8083	5.5877	4.0474	6.846	4.5281	8.4308	3.4169	2.2443	7.1726	7.3675	5.5647	5.5648	10.1816	1.7276	4.6142	6.7702	11.6325	5.6358	7.2035	9.1471	3.9511	10.8897	1.5954	4.8951	8.3372	4.1525	5.4186	3.224	8.8918	1.6588	2.278	2.5012	1.89	11.0952	8.6658	7.8747	2.9679	10.7221	7.9398	1.9782	3.4854	35.9907	3.7884	17.815	16.1215	10.4774	10.9311
81893	SLC7A5P1	non-coding	0.9859	0	3.8612	1.9926	4.4944	1.0351	0	2.7211	0.3053	0	4.4904	4.7245	0.456	0.5127	1.7534	1.2086	0	0.5968	2.0619	0	4.4398	1.045	0.64	0	0	4.9718	0	0	2.4238	3.0927	3.2466	2.7105	4.4802	0	1.0184	3.3287	5.4873	1.5656	1.0053	0	0.533	1.4707	0	0	0.3652	0.0258	1.1774
83656	FAM167A-AS1	non-coding	11.3459	1.98	0	2.2263	3.3708	1.327	0.3366	0.3179	1.4091	1.8282	0	56.7613	0	0.4308	0	13.4286	0	0.6782	18.5841	0.2734	0	0.5265	0.3122	0	0	3.219	0	2	0.4415	1.6066	0	5.3528	1.2393	0.4087	2.5191	0.7231	0.4192	5.4551	4.615	0	0	0	0	0	0	0	0.7695
83863	TTTY5	non-coding	0	0	0	0	1.1236	0	0	0	0	0	0	0	0	0	0	0	0	0	0	0	0	0	0	0	0	0	0	0	0	0	0	0	0	0	0	0	0	0	0	0	0	0	0	0	0	0	0
83866	TTTY11	non-coding	0	0	0	0	0	0	0	0	0	0	0	0	0	0	0	0	0	0	0	0	0	0	0	0	0	0	0	0	0	0	0	0	0	0	0	0	0	0	0	0	0	0	0	0	0	0	0
83867	TTTY12	non-coding	0	0	0	0	6.7416	0	0	0	0	0	0	0	0	0	0	0	0	0	0	0	0	0	0	0	0	0	0	0	0	0	0	0	0	0	0	0	0	0	0	0	0	0	0	0	0	0	0
83868	TTTY13	non-coding	0	0	0	0	0	0	0	0	0	0	0	0	0	0	0	0	0	0	0	0	0	0	0	0	0	0	0	0	0	0	0	0	0	0	0	0	0	0	0	0	0	0	0	0	0	0	0
83869	TTTY14	non-coding	0	11.0882	0	0	0	0	5.3863	0	2.8183	5.4845	2.7548	0	0.8071	0	0	0	7.4543	3.7301	0	0.2734	9.8778	1.0529	9.6784	0	2.4405	0.8779	0	0	0	9.2379	0.4484	0.9732	0	0	5.758	0.4821	0.8384	0	0	1.57	3.8344	0	0.617	40.7737	0	3.1584	0
83955	NACAP1	non-coding	143.975	163.155	175.551	139.518	102.247	159.239	243.73	198.363	156.885	212.066	135.537	201.447	180.791	150.358	174.187	85.0476	138.651	82.0617	184.956	176.053	236.808	88.9708	198.876	129.299	139.106	186.993	84.2471	159.2	139.073	109.248	90.1345	127.007	180.325	192.481	141.43	224.646	124.502	143.47	182.393	150.721	156.058	89.1766	164.738	194.982	115.032	115.139	123.509
83956	RACGAP1P	non-coding	1.5649	1.98	7.093	4.0816	25.8427	2.2117	2.6931	4.1326	5.1669	1.8282	7.7135	6.6778	2.4213	2.1541	0	2.9841	2.2363	5.0865	1.7699	3.5539	7.0185	2.369	4.0587	4.2814	3.9657	4.6821	6.9537	2	1.766	2.0082	4.0359	9.2457	3.718	0.8173	1.0796	6.2669	1.6768	2.7276	6.6215	1.9625	1.9172	0	8.638	10.4548	4.4374	2.297	5.0019
84054	PCDHB19P	non-coding	2.3474	3.9601	2.6599	1.4842	40.4494	1.327	3.3664	7.9472	7.9852	1.8282	3.3058	0	5.2462	5.6007	1.1536	5.5952	1.4909	10.8511	0	3.2805	3.1193	2.1058	4.3709	0.8563	4.2708	1.4632	2.6745	0.4	2.2075	6.828	0	1.4599	17.9706	3.2693	7.1975	2.6514	1.6768	6.2734	3.2104	2.355	0.7669	8.9896	0.617	0.5227	8.5335	2.8713	5.0019
84099	ID2B	non-coding	0.7825	0.396	0	2.9685	11.236	2.654	0.3366	0.3179	1.4091	0	6.0606	0	1.6142	1.2925	0	1.119	0.3727	1.6955	0	3.0071	2.8594	0.7897	0.3122	0.5709	1.5253	1.4632	5.6165	1.2	0.4415	0	2.2422	2.9197	4.9574	1.226	0.3599	1.2052	2.5152	0.5455	1.4046	0.785	1.1503	1.0787	8.638	5.7501	6.4855	2.8713	2.3086
84176	MYH16	non-coding	1.5649	0.396	0.4433	2.5974	0	0	2.3565	8.2651	0	3.6563	0.551	2.7824	0.4036	0.4308	0	1.4921	1.8636	0.3391	0	0.8201	0.7798	1.5794	2.4977	0.8563	0.6101	0.5853	3.2094	3.6	0.4415	7.6313	5.3812	0	0	0.8173	2.5191	28.6833	0.8384	2.7276	0.2007	0.3925	19.5552	0	0	0	0	0	1.1543
84222	TMEM191A	non-coding	88.0282	31.2845	7.5363	26.3451	44.9438	26.0975	22.5551	43.8687	14.0915	9.1408	18.7328	65.1085	14.1243	25.4188	1.1536	31.3333	81.625	11.1902	47.7876	33.0782	20.7954	48.9603	39.6503	17.982	24.0995	38.9202	10.9655	7.2	41.9426	17.6725	44.843	42.8224	23.5476	48.2223	28.7899	34.7092	79.6479	12.0013	21.4698	22.3727	22.2393	21.575	151.165	223.732	119.81	14.0693	27.3182
84278	MFSD14C	non-coding	91.9405	20.9884	24.8254	37.4768	25.8427	30.0785	14.8123	22.2522	24.4252	40.2194	21.4876	16.138	29.4592	19.3872	18.4569	19.7698	9.3179	39.6745	18.5841	17.7693	32.2329	16.3201	40.2747	21.6926	23.7944	21.3622	23.2683	22.4	23.3996	64.6651	20.6278	29.6837	23.5476	35.1451	23.7517	21.2112	19.7024	32.1853	59.5937	36.8953	21.089	34.1604	38.2539	33.978	30.7206	18.9505	54.2516
84536	LINC01547	non-coding	37.9499	15.0483	17.2891	15.9555	51.6854	43.3484	44.437	17.8018	36.1681	31.0786	50.1377	17.8075	41.9693	43.0826	31.1461	32.4524	53.2985	54.9339	53.9823	21.8699	36.6519	74.2301	28.7231	83.6307	82.6703	27.2149	77.2934	37.2	33.9956	37.7548	46.1883	34.5499	20.4493	53.1263	34.188	20.7291	35.2127	24.5481	58.7911	24.3352	30.6748	90.6149	77.7418	36.069	75.7775	33.5941	56.945
84546	SNORD35B	non-coding	0	0	0	0	0	0	0	0	0	0	0	0	0	0	0	0	0	0	0	0	0	0	0	0	0	0	0	0	0	0	0	0	0	0	0	0	0	0	0	0	0	0	0	0	0	0	0
84657	LINC00852	non-coding	4.6948	4.7521	7.5363	11.5028	19.1011	3.981	8.4161	8.2651	16.44	20.1097	18.1818	7.7908	19.3705	18.0947	2.3071	6.7143	1.1182	6.4429	10.6195	14.7622	15.5966	6.3175	8.1174	5.994	14.9478	2.6337	5.0816	3.2	7.947	10.8445	7.1749	14.1119	12.3935	17.1639	8.9969	15.6674	1.2576	14.4561	12.2398	6.2801	4.2178	6.4725	6.17	3.1364	3.4134	15.7921	5.0019
84664	CSPG4P2Y	non-coding	0	0.396	0	0	3.3708	0	6.3962	0	0	0	0	0	0	0	0	0	0	0	0	0	5.1989	0	0.3122	0	0.3051	0	0	0	0	0	0	0	0	0	0	0.4821	0	0	0	0	0	0	0	0	0	0	0
84672	TTTY6	non-coding	0	0	0	0	0	0	0	0	0	0	0	0	0	0	0	0	0	0	0	0	0	0	0	0	0	0	0	0	0	0	0	0	0	0	0	0	0	0	0	0	0	0	0	0	0	0	0
84673	TTTY8	non-coding	0	0	0	0	0	0	0	0	0	0	0	0	0	0	0	0	0	0	0	0	0	0	0	0	0	0	0	0	0	0	0	0	0	0	0	0	0	0	0	0	0	0	0	6.2729	0	0	0
84677	DSCR8	non-coding	0	0.396	0	0	4.4944	0	0	0	0	0	0	0	67.3931	0	0	0	0	0	59.292	0	0	0	0	0	0	0	1.0698	0	0.4415	12.8527	0	0	0	1.226	0	0	0	12.0013	0	0.785	0	0	447.324	614.218	0	0.5743	0
84740	AFAP1-AS1	non-coding	89.3036	13.4919	129.026	11.154	67.7865	1029.38	114.796	244.749	11.2779	495.43	291.262	5.0195	12.5424	3105.47	4.6142	5.2446	76.8282	23.8861	170.558	382.767	2.0847	10.0421	2.1948	2.2948	881.86	2.0543	15.325	62.104	2.2163	10.1175	580.807	2.4477	1.8652	126.706	54.1143	1247.88	2.9428	167.391	618.047	90.9116	2196.88	1.4419	3.0912	14.1871	1.024	74.4699	5.3905
84771	DDX11L2	non-coding	61.0329	7.5241	6.2064	5.5659	20.2247	36.7135	7.4062	23.2059	7.0457	16.4534	35.2617	32.8325	27.4415	3.4466	6.9214	32.0793	29.0719	2.0346	57.5221	21.5965	8.5781	5.791	0.3122	43.0998	33.5562	2.0484	11.5004	2.8	12.8035	4.4181	14.3498	26.764	22.928	15.5292	1.0796	40.2531	2.5152	29.7305	11.8385	1.57	3.8344	98.5257	7.404	9.4093	4.4374	16.9406	11.5429
84789	MGC2889	non-coding	2.3474	4.3561	9.3095	4.8237	31.4607	10.1736	13.1291	2.861	11.7429	1.8282	7.7135	3.8954	6.0533	0	8.0749	10.8175	1.4909	1.0173	76.9912	1.3669	20.2755	17.373	15.6104	2.2834	0.9152	19.3138	24.873	12.4	7.064	48.5993	10.7623	35.0365	9.2951	19.2072	2.879	1.4462	0	12.2741	0.602	9.0276	0.3834	12.945	0	18.8186	2.7307	2.0099	84.6479
84791	LINC00467	non-coding	223.787	79.9933	80.2394	90.9091	51.6854	196.837	105.37	464.118	108.504	151.737	85.9504	127.435	105.327	219.721	515.641	75.7222	142.005	75.2798	134.513	101.421	68.8848	187.944	129.566	91.0518	114.701	112.078	163.68	81.2	104.636	172.708	237.668	95.8637	90.4725	43.727	132.793	58.8129	241.04	58.6427	43.3409	71.4356	120.782	220.424	75.2738	260.324	682.68	171.703	76.9527
84793	FOXD2-AS1	non-coding	25.0391	59.797	49.6509	60.4824	97.7528	36.2711	142.064	22.2522	97.2311	42.0475	187.879	19.4769	43.5835	57.7308	57.6779	52.5952	66.3436	27.1278	72.5664	32.2581	80.5823	51.8558	163.597	77.9221	47.5888	47.6992	136.4	47.6	69.7572	93.182	167.713	206.326	150.581	27.3805	34.188	46.7611	21.3792	84.0091	58.7911	67.9031	42.5613	20.1366	56.1468	74.7517	92.1618	126.911	106.579
84809	CROCCP2	non-coding	126.831	319.415	228.594	323.31	499.551	111.49	151.52	288.961	352.122	365.978	464.738	198.998	610.004	217.206	158.038	126.329	229.862	193.482	291.54	138.174	202.462	152.438	282.151	269.759	147.943	120.638	639.289	416.108	425.501	208.326	684.274	778.564	772.332	196.13	248.385	232.47	155.59	410.657	181.277	507.232	240.138	598.439	579.028	547.616	478.695	281.332	150.843
84815	MGC12916	non-coding	66.1189	11.4842	23.0522	41.9295	42.6966	14.1546	74.7349	13.6692	5.1669	20.1097	25.3444	12.2426	14.5278	19.3872	17.3034	17.9048	7.4543	19.3286	14.1593	24.0569	27.0341	7.6336	2.4977	2.8543	9.4567	1.4632	3.4769	13.2	3.9735	27.312	2.2422	10.7056	9.2951	2.452	10.0765	4.5797	14.672	10.092	11.6378	9.8126	25.6902	12.945	86.9968	1.0455	4.0961	19.8119	35.3982
84820	POLR2J4	non-coding	438.302	219.483	210.094	631.165	309.607	204.844	408.204	1284.28	230.311	182.048	225.934	522.944	306.509	139.299	217.988	365.305	418.245	1248.45	222.239	218.081	246.813	556.196	619.02	155.704	181.753	638.958	464.442	1290.03	293.408	269.24	275.709	467.216	870.878	718.414	309.279	289.668	330.396	442.608	232.682	476.13	133.071	246.519	289.619	328.704	208.139	262.726	286.96
84832	ANKRD36BP1	non-coding	55.5556	122.366	115.704	81.2616	39.3258	33.6172	98.6366	123.659	70.9271	60.3291	218.733	71.7863	206.618	178.362	138.427	92.1349	108.461	137.674	110.62	232.094	158.565	86.3385	95.8476	110.461	136.36	81.9372	281.894	141.2	44.1501	53.419	74.4395	86.618	19.8296	154.066	118.399	147.755	104.381	199.658	111.964	80.0707	41.0276	106.796	32.7009	68.4788	100.013	101.931	61.1774
84837	ARHGAP5-AS1	non-coding	112.285	60.589	69.5999	89.4249	721.348	95.9858	169.332	77.565	87.3671	63.9854	319.559	122.983	74.2534	43.0826	77.2884	109.294	150.578	76.297	240.708	34.4451	182.48	141.09	120.2	87.3412	52.7748	121.443	47.6063	34.4	83.0022	102.018	116.144	227.737	34.0821	89.0887	97.5259	61.2233	103.961	38.4587	31.703	76.5381	81.2883	61.1291	16.659	78.9336	196.27	35.0298	272.028
84848	MIR503HG	non-coding	4.3036	5.5441	8.4229	17.0686	11.236	4.8656	15.4856	6.0399	5.1669	16.4534	11.0193	7.7908	28.2486	4.3083	11.5356	3.3571	6.3362	16.9549	9.7345	3.8272	1.0398	3.422	4.3709	6.5649	1.2202	1.7558	7.7561	0.8	8.83	19.279	12.5561	5.8394	24.787	4.0866	4.6784	3.3745	9.6416	2.1821	10.6346	16.4851	9.9693	2.8767	7.404	2.6137	2.7307	5.1683	10.0038
84850	GLIS3-AS1	non-coding	2.3474	0	0.4433	0.3711	1.1236	2.7911	1.3466	1.2716	2.3486	1.9013	0.551	0.5565	8.4746	2.1541	0	3.3795	0	3.4113	1.7699	1.9136	2.3395	1.8531	3.4343	2.2834	0.3051	6.1453	0.5509	0	0	2.0082	0	0	0	1.2914	2.5191	0	2.6032	16.4881	1.2039	1.57	0.7669	2.8767	0	0	0	0.8614	0.7695
84852	ATP1A1-AS1	non-coding	39.9178	43.9726	23.9433	23.4063	51.6966	36.311	50.1767	15.5893	66.2534	80.4753	21.4986	19.488	23.0307	34.9142	54.2519	30.591	47.35	27.823	54.0177	20.7873	24.7024	82.14	60.6088	25.4174	22.8884	47.7197	99.2485	17.228	22.5475	10.4468	65.4978	38.4769	31.0147	56.4283	46.8088	28.4495	47.3947	33.0418	43.1482	50.3071	42.569	204.409	179.565	172.535	235.275	55.7175	58.8919
84856	LINC00839	non-coding	107.981	270.077	127.23	75.3247	85.3933	141.988	198.62	76.9292	98.6403	43.8757	214.876	22.8158	78.2889	47.3909	267.626	86.1666	99.8882	82.7399	79.646	36.0853	397.453	37.115	315.329	2.5689	704.07	135.196	35.0361	59.2	116.115	53.8207	51.1211	300.73	375.523	81.3241	144.669	384.935	163.069	36.5494	484.575	266.117	16.4877	73.7145	5.553	30.3189	182.276	72.0695	110.812
84931	LINC01101	non-coding	5.0861	1.188	0	0.3711	12.3596	0.8847	0	0	1.4091	5.4845	4.9587	0	3.632	0	3.4607	1.119	2.609	0.6782	0.885	0.8201	2.8594	1.8426	0	0.5709	0.3051	2.3411	6.6863	0.4	1.3245	2.8115	0	0	0	3.2693	1.0796	2.1693	1.2576	7.0917	1.8059	3.925	0.3834	80.187	9.255	3.1364	14.3363	0.2871	15.3905
84973	SNHG7	non-coding	777.93	512.551	304.484	608.479	758.157	348.999	792.877	407.483	306.09	417.697	242.92	453.701	425.02	480.07	264.638	232.549	206.825	346.28	312.513	495.353	711.937	130.716	1161.46	634.092	481.074	193.331	294.525	390.52	1427.4	996.365	1094.3	1644.56	1138.52	319.857	436.596	675.722	298.386	271.516	183.348	474.501	338.631	551.093	1079.41	1137.61	280.773	312.655	123.775
84981	MIR22HG	non-coding	285.994	223.348	282.389	195.547	84.2697	376.424	77.0914	161.17	387.046	223.035	135.537	109.071	528.249	199.904	89.9776	205.159	261.647	315.7	75.2212	171.405	81.3621	226.112	109.273	103.611	95.7877	115.59	20.5937	75.6	263.576	232.955	467.713	122.628	309.837	146.302	331.444	43.8686	199.539	175.928	248.207	348.935	157.209	453.434	505.322	85.7292	143.704	221.377	212.774
84983	FAM222A-AS1	non-coding	8.6072	5.5441	1.3299	0	1.1236	0.8847	0.3366	0.6358	0	0	0.551	53.4224	0.4036	3.8774	3.4607	3.7302	15.2814	3.0519	2.6549	8.4746	0.7798	0.7897	0.3122	13.1297	0.3051	10.2422	0	2.8	8.3885	8.4346	0.8969	0	2.4787	0.4087	0.3599	5.7849	1.2576	4.3641	0.8026	3.5325	6.9018	12.945	0	11.5003	3.0721	0.2871	0.7695
84989	JMJD1C-AS1	non-coding	1.6667	3.9601	11.0828	3.3173	7.8652	6.635	23.6122	3.6557	10.996	14.6252	4.4077	11.0796	9.5601	2.1714	9.2285	5.8265	14.536	5.2018	6.0708	11.1509	2.9088	16.8281	4.9891	6.0111	7.5715	3.0463	4.2872	11.496	9.2715	19.2951	9.2422	0.8662	0.9729	1.8635	6.2186	2.3043	8.3924	4.015	5.7045	4.2076	10.3834	9.5254	8.021	3.1364	37.4109	5.1683	8.08
84996	URB1-AS1	non-coding	181.925	66.5291	152.499	71.243	271.91	205.684	114.459	68.982	57.775	96.8921	203.857	116.305	48.8297	62.9007	238.787	161.889	345.136	53.2384	207.965	90.76	190.798	201.632	141.43	198.944	73.8236	219.475	254.881	93.2	97.5717	285.169	105.381	139.173	39.6592	156.518	79.5322	73.2751	207.084	101.466	107.148	83.9957	80.9049	315.354	98.1027	296.393	324.956	96.4755	180.839
85001	MGC16275	non-coding	21.9092	26.5324	22.1656	44.5269	35.9551	37.1558	53.5263	35.9215	37.5773	21.9378	13.7741	36.7279	34.3019	26.2804	36.9139	24.619	14.9087	34.9271	57.5221	22.4166	16.6363	18.4259	76.803	23.4052	47.5888	36.8718	12.3028	16.4	22.5166	22.8939	44.843	34.5499	65.6855	20.4332	26.2708	62.1874	22.2176	33.2763	31.1011	30.6152	19.5552	139.159	135.74	30.8416	19.115	37.614	38.8611
85009	MGC16025	non-coding	0	0.792	0.4433	1.1132	8.9888	0	0	1.9073	1.4091	0	1.6529	2.7824	0.4036	0	4.6142	0.373	0	0.6782	0.885	1.0935	2.0795	1.0529	0.3122	7.1357	0.3051	0	0.5349	2	0.4415	4.0165	1.7937	3.8929	3.718	0.8173	0.3599	0.7231	0.8384	0.8183	1.0033	1.9625	0	19.7771	0.617	0.5227	5.4614	0.5743	0.7695
85026	ARRDC1-AS1	non-coding	152.973	199.191	124.57	126.531	157.303	175.163	103.013	91.2342	172.855	193.784	162.534	161.38	145.682	130.971	99.2061	122.349	199.404	102.069	186.726	85.8393	134.39	102.922	203.871	121.593	124.158	119.102	245.788	186	222.958	307.26	350.673	314.355	279.473	143.85	142.51	90.1476	142.528	138.56	140.657	102.051	163.344	601.942	160.42	341.871	173.401	185.773	199.692
85028	SNHG12	non-coding	187.011	282.353	288.981	470.794	305.618	160.124	111.429	149.408	321.647	621.572	232.507	295.493	506.053	327.428	209.948	73.8571	342.154	96.6429	231.858	151.769	86.0411	139.51	192.632	105.609	194.931	116.761	148.435	325.964	208.83	281.554	183.798	685.645	361.27	183.081	173.099	269.165	399.497	226.661	153.186	276.322	421.012	301.33	621.317	877.616	332.124	234.011	163.524
85495	RPPH1	non-coding	48.5133	47.9168	9.3095	8.5343	108.989	109.256	56.2195	19.7091	7.5155	42.0475	21.4876	32.8325	7.2639	376.111	14.9963	13.0555	644.428	14.5812	20.354	34.9918	7.0185	19.742	66.5002	29.6846	7.0163	101.836	10.4306	7.2	36.2031	45.7877	9.417	21.8978	32.2231	128.32	84.2105	21.9343	34.3743	9.001	17.6574	177.804	84.7393	447.321	244.331	585.991	123.565	6.8911	291.266
89837	ULK4P3	non-coding	0	4.3561	5.763	12.2449	6.7416	1.327	16.8322	0.3179	9.3943	10.9689	3.8567	1.113	18.5634	11.2015	3.4607	2.6111	7.8271	2.0346	3.5398	11.7551	2.0795	1.3161	3.1221	1.4271	2.4405	1.7558	19.7914	0.8	0.4415	6.828	12.5561	0	1.2393	0.4087	7.5574	5.5438	8.8032	1.6365	1.6052	5.8875	49.8466	5.7533	3.085	19.3413	2.3894	13.208	7.6953
89883	OR6W1P	non-coding	0	0	0	0	6.7416	0.8847	0	0	0	0	0	0	0	0	2.3071	0	0	0	0	0	0	0	0	0	0.3051	0	0	0	0	0	0	0	0	0	0	0	0	0	0	0	0	0.7192	1.851	0	0	0	0
90011	KIR3DX1	non-coding	0	0.792	0.4433	0.3711	3.3708	0.4423	0	0	0.4697	0	0.551	0	0.8071	1.2925	0	0	0.7454	0.6782	1.7699	1.9136	0.2599	0.2632	0	0	1.8303	0	0	0	0	0.4016	0	0	0	0	0	0.241	0.4192	0.8183	0	0	0.3834	0	3.085	0	0	1.1485	0.3848
90246	LOC90246	non-coding	6.651	3.1681	30.1452	21.1503	56.1798	19.0202	4.0397	2.2252	147.021	38.3912	87.0523	3.3389	114.205	24.1263	11.5356	10.4444	4.8453	45.4391	0.885	27.064	38.9914	17.1098	20.6057	23.1197	14.0326	4.3895	5.0816	2.8	22.0751	121.699	122.87	1.4599	55.151	98.0793	8.637	3.6155	5.8688	15.5471	42.5382	41.6053	35.6595	14.7429	0	0.5227	264.197	61.7328	49.2497
90271	OLMALINC	non-coding	309.859	74.0532	57.6305	105.009	246.067	111.91	54.1996	37.193	35.6984	89.5795	105.234	205.342	45.6013	55.5766	56.5244	49.9841	123.742	90.5392	118.584	94.3138	88.3806	161.095	179.831	36.5349	87.8562	86.3267	36.3734	112.4	103.311	356.261	92.3767	90.5109	115.879	46.5877	48.9429	152.576	210.438	55.6424	94.7078	59.6605	44.4785	300.252	72.8058	199.686	934.248	100.495	86.5718
90586	AOC4P	non-coding	0	0.792	0.8866	6.679	26.9663	0.4423	1.6832	1.5894	8.9246	3.6563	1.1019	0.5565	15.7385	8.1857	4.6142	2.2381	0.7454	1.6955	0.885	0	0.2599	1.8426	0.6244	0.2854	1.8303	0	0.5349	0	0.4415	0.8033	0.4484	2.9197	0.6197	1.226	5.3981	0.4821	2.096	2.1821	1.0033	0.3925	0.3834	1.0787	6.787	0.5227	2.3894	3.1584	2.3086
90632	LINC00473	non-coding	0	3.1681	0	0	17.6966	0.4423	0	0.9537	11.2732	27.4223	7.5647	0	16.9209	0.4308	0	3.6705	4.0999	2.7128	0	0	1.5597	0.5265	1.2488	0	0.9152	1.4632	0	0	0.883	1437.6	0	0	1.072	0	2.1592	1.4462	0	3.5458	3.381	4.3175	9.2025	80.187	0.617	0	0	579.683	1.9238
90768	LOC90768	non-coding	4.6948	6.3361	35.0216	13.3581	44.9438	14.5969	6.3962	23.5238	7.5155	18.2815	6.0606	17.8075	14.1243	17.2331	59.9851	11.1905	5.9635	16.2767	7.0796	5.1941	91.4999	3.9484	73.9931	1.998	40.8776	0.2926	1.8722	33.2	0.883	1.2049	1.3453	14.1119	11.7738	4.4953	19.4332	61.9464	6.7072	29.185	2.4078	31.7928	1.9172	10.0683	1.234	4.1819	3.0721	22.9704	27.703
90784	LOC90784	non-coding	71.5962	183.351	251.801	323.191	349.438	147.739	965.831	261.623	653.375	290.676	521.763	375.07	535.109	250.31	377.214	298.786	132.687	319.43	978.761	372.881	607.746	708.871	193.569	427.287	559.473	237.911	305.964	190.8	181.016	180.339	215.695	448.175	257.165	476.093	215.205	460.139	64.1375	637.978	505.242	155.039	124.233	154.261	90.0818	42.8646	1066.69	242.337	319.354
91149	RAPGEF4-AS1	non-coding	0	0	0.8866	0.3711	35.9551	0	0	0	0.4697	0	0.551	0.5565	2.4213	0	0	0	0	0.3391	0.885	0	0	0.5265	0.9366	0.5709	0.3051	0.5853	6.6863	0	0	0.8033	0.8969	0	0	0.4087	0.3599	0	0	0.8183	0.602	1.1775	1.1503	5.3937	0.617	4.7047	0.6827	0	5.3867
91316	GUSBP11	non-coding	94.1745	106.257	230.358	389.651	238.753	65.8321	61.5519	155.416	330.046	471.042	301.477	226.667	552.861	240.582	118.032	147.035	103.328	209.003	340.699	137.157	206.574	197.36	113.681	51.9252	61.118	94.696	266.347	276.724	332.38	262.798	351.785	441.367	427.588	376.551	95.1399	484.91	137.866	270.024	141.006	338.118	160.606	309.54	284.893	409.629	250.591	170.486	156.406
91353	IGLL3P	non-coding	0	0.792	0.4433	1.1132	1.1236	0.8847	0.6733	0.9537	0.4697	5.4845	1.1019	0.5565	0.4036	1.7233	3.4607	0	0	0.6782	1.7699	0.2734	0.5199	1.0529	0.3122	0	0.9152	0	0.8024	0	0	0	0	1.4599	1.859	1.6347	0.3599	0.241	0.4192	0.2728	0.2007	0	0.3834	0.7192	1.234	2.6137	1.3654	2.0099	1.5391
91450	LOC91450	non-coding	0.7825	3.1681	2.2166	10.0186	28.0899	3.0963	5.0497	4.1326	12.6823	12.7971	2.2039	2.7824	6.8604	0.4308	2.3071	7.0873	1.8636	4.0692	3.5398	3.8272	0.7798	2.1058	1.8732	1.4271	3.3556	0.8779	2.6745	12.8	8.83	5.6231	2.2422	2.4331	13.0132	13.4859	2.5191	2.6514	1.2576	0.5455	2.2072	5.495	9.2025	3.5958	4.936	4.1819	3.7547	8.3268	3.4629
91695	RRP7BP	non-coding	134.914	88.4402	59.1156	111.213	155	259.281	73.3446	127.168	129.834	114.497	80.2039	168.726	148.083	113.876	91.0619	102.956	97.9799	74.4049	130.797	76.5336	110.107	87.1414	135.286	82.8942	80.4678	178.638	252.273	164.216	212.411	144.85	253.099	440.876	280.291	262.975	149.585	172.855	102.02	245.724	184.403	358.422	92.5729	207.335	193.509	360.23	85.3111	110.663	75.606
91948	LINC00923	non-coding	2.3474	0	0.4433	0.3711	4.4944	3.0963	0	0	0.4697	0	3.3058	3.8954	2.8249	1.2925	21.9176	1.8651	4.0999	0.3391	4.4248	0	0	2.1058	3.4343	3.7106	0.6101	0	0	3.6	8.83	8.8362	0	0	0	2.0433	0.3599	0	1.6768	0.2728	0	0	4.9847	5.3937	0	0	0	0.8614	7.6953
92070	CTBP1-AS2	non-coding	235.916	339.378	156.489	234.879	328.09	360.5	291.533	151.951	442.942	431.444	404.959	173.066	362.389	365.772	173.034	326.016	246.739	239.403	453.982	296.61	362.1	965.78	459.569	280.006	273.636	301.412	560.578	162	475.055	397.63	236.771	244.769	179.086	338.373	422.852	328.774	176.064	335.218	232.756	85.9582	171.012	373.966	154.25	87.2974	298.673	331.922	260.485
92249	LINC01278	non-coding	285.211	251.464	358.196	498.701	86.5169	321.575	383.437	187.555	601.706	484.461	720.661	188.648	523.809	283.053	382.981	235	468.133	244.829	432.743	145.161	438.784	240.853	350.609	55.3732	405.725	210.403	322.011	499.2	168.653	337.383	21.0762	12.1655	374.284	373.519	464.957	465.923	186.963	327.035	480.562	42.7828	329.371	742.539	56.7638	326.712	670.051	404.565	143.901
92659	MAFG-AS1	non-coding	217.919	117.218	98.8585	76.0668	219.101	122.083	159.232	98.2278	130.581	93.2358	45.1791	375.07	84.3422	175.346	216.869	132.048	215.058	101.39	351.327	172.772	207.694	407.212	130.815	269.445	173.272	100.081	85.3169	55.6	390.287	42.5746	92.8251	302.676	52.6723	73.1508	117.679	311.419	34.3743	256.664	172.561	84.7807	64.4172	314.635	53.0619	81.0246	505.183	120.307	290.881
92973	LINC00950	non-coding	1.5649	7.9201	35.4649	9.6475	34.8315	6.635	11.7825	0.9537	19.7281	21.9378	15.978	3.3389	71.4286	55.5766	16.1498	13.4286	3.3545	53.9166	50.4425	96.7742	48.0894	8.9497	38.7137	13.4152	33.8613	5.2674	30.4894	19.2	84.3267	11.6478	18.3857	23.3577	42.1379	89.906	11.516	2.1693	2.5152	44.4594	8.2267	4.3175	1.1503	79.8274	1.234	15.1594	20.1391	14.3565	15.0058
93164	HTR7P1	non-coding	104.069	89.1015	176.881	61.5955	192.135	57.9454	143.41	23.2059	116.49	56.6728	180.165	45.0751	85.1493	96.5051	241.094	145.476	161.014	67.1414	139.823	80.9185	477.775	127.139	120.2	95.6187	93.3473	137.83	262.904	86	81.2362	44.5828	178.475	122.141	56.3904	243.155	109.042	26.273	146.72	132.287	48.1565	114.611	74.7699	27.3283	20.3609	142.708	35.158	71.2081	105.81
93429	LOC93429	non-coding	4.3036	19.0083	10.6395	27.8293	13.4831	4.8656	21.8818	8.9009	5.6366	12.7971	3.8567	94.6021	90.799	6.4624	21.9176	4.8492	13.0451	4.7474	15.9292	10.6616	0.5199	6.5807	36.8405	17.1257	3.3556	3.5116	0.2675	20.8	40.1766	1.6066	28.2511	16.0584	39.6592	4.0866	12.2357	1.6873	11.7376	0.2728	2.0065	12.1676	1.5337	42.7904	0	3.1364	20.4804	9.1881	33.8592
93556	EGFEM1P	non-coding	0.3912	0	4.4331	0	14.6067	0	0	0	0.4697	3.6563	0	0.5565	2.4213	0.4308	2.3071	0.373	0.3727	1.3564	1.7699	1.0935	1.2997	0.7897	1.561	0	1.8303	0.8779	0.2675	0	1.766	0.4016	0.4484	3.8929	0	0.8173	1.7994	4.3387	0.4192	32.1853	23.4763	0	0	1.7979	4.319	0	0	0.8614	1.1543
93622	LOC93622	non-coding	335.289	248.296	199.047	237.106	171.91	313.613	235.987	102.36	401.137	376.6	242.424	200.334	345.843	268.405	66.9064	177.929	194.931	267.209	307.965	196.555	223.291	619.637	259.757	208.934	102.194	274.197	397.7	120.4	538.19	333.769	203.139	406.326	228.66	256.232	244.355	191.142	197.024	133.378	186.807	131.096	99.6933	579.648	262.841	348.667	302.086	214.198	225.856
93653	ST7-AS1	non-coding	9.6205	22.3348	22.0547	26.1187	34.4719	11.1158	9.8637	12.1179	36.8774	43.0896	16.9036	15.4647	31.4326	20.4126	117.928	25.7045	50.3354	16.1207	63.7965	8.3297	26.1321	102.561	20.2966	23.2339	18.6603	17.7453	64.2284	13.056	49.4967	37.7588	26.2825	57.2311	23.2564	71.1279	35.2029	27.9506	22.7332	36.1866	66.2232	10.4798	21.3689	98.238	6.8919	41.265	35.3185	24.3945	36.0793
93654	ST7-AS2	non-coding	0	0	0.4433	1.1132	1.1236	0	0	0	2.8183	0	0	0.5565	0.8071	0	0	0	0	0.6782	0	0	0.2599	0	0	0.5709	0	0	0	0.4	0	0	0	0	0	0	0	0	0	0	0	0	0	0	0	0	0	0	0
93655	ST7-OT3	non-coding	1.9601	0.7999	1.791	3.2282	0	0.9024	0.34	0.6421	1.9117	1.8647	1.1129	0.5565	0.4076	2.1757	3.5068	0.3767	1.1219	0.3459	0	1.0962	0.2599	1.861	1.5829	1.4414	1.5436	1.1793	2.1931	0.404	1.8013	0	1.8341	0.9927	4.4555	2.0515	1.821	1.9476	2.1044	1.6502	2.8392	0.3964	1.5567	7.2384	0	7.862	2.4064	2.0243	0.7772
93668	HPYR1	non-coding	0	0	0.4433	0	2.2472	0	0	0	0	0	0	0	0	0	0	0	0	0	0	0.2734	0.5199	0.2632	0	0	0	0	0	0	0	0	0	0	0	0	0	0	0	0	0	0	0	0	0	0	0	0	0.3848
94009	SERHL	non-coding	77.0736	40.3927	51.4241	50.8349	124.719	197.722	56.2195	72.1609	79.3819	65.8135	61.157	93.4891	72.2357	84.0112	88.824	109.667	108.461	121.397	205.31	90.2132	138.29	76.3359	98.9697	72.7844	79.6197	81.6446	101.899	96.4	111.258	139.371	107.175	193.187	96.6692	116.469	125.236	112.323	66.2335	194.203	103.938	64.763	46.0123	139.159	73.4228	101.411	46.7636	185.198	68.8726
94158	CDRT15P1	non-coding	1.5649	2.376	7.093	5.9369	13.4831	1.7693	4.3764	0.9537	11.2732	7.3126	5.5096	2.2259	11.2994	6.0316	2.3071	1.4921	0.7454	2.7128	1.7699	4.1006	1.2997	3.422	7.1808	3.1397	1.8303	2.0484	1.3373	9.2	1.766	12.8527	4.0359	3.4063	13.6328	2.8606	3.9586	3.6155	2.5152	6.8189	4.615	4.3175	4.2178	3.9554	12.34	5.2274	7.8508	4.3069	3.0781
94161	SNORD46	non-coding	0	0	0	0	0	0	0	0	0	0	0	0	0	0	0	0	0	0	0	0	0	0	0	0	0	0	0	0	0	0	0	0	0	0	0	0	0	0	0	0	0	0	0	0	0	0	0
94162	SNORD38A	non-coding	0	0	0	0	0	0	0	0	0	0	0	0	0	0	0	0	0	0	0	0	0	0	0	0	0	0	0	0	0	0	0	0	0	0	0	0	0	0	0	0	0	0	0	0	0	0	0
94163	SNORD38B	non-coding	0	0	0	0	0	0	0	0	0	0	0	0	0	0	0	0	0	0	0	0	0	0	0	0	0	0	0	0	0	0	0	0	0	0	0	0	0	0	0	0	0	0	0	0	0	0	0
96610	BMS1P20	non-coding	17637	118212	25595.7	72021.3	223083	106960	104759	30896.2	54012.8	662541	396965	22968.7	12155.2	73306.2	175046	39701	45209.1	218941	101517	219255	12962.4	31419	18888.8	627.447	597857	14134.1	13765.6	80119.1	9386.9	6617.04	802.435	26693.2	28019.9	9577.35	196512	48587.7	14552.2	17078	4728.8	4800.64	15622.5	729.162	262235	54813.5	24077.4	362228	154099
112597	LINC00152	non-coding	192.88	245.524	240.275	207.421	400	226.916	151.49	127.156	117.429	473.492	138.843	170.284	171.913	152.513	556.015	260.738	493.85	220.414	232.743	237.288	143.488	228.218	331.252	341.087	165.646	192.553	220.915	131.2	184.106	306.457	400	81.2652	198.296	29.0151	414.215	104.369	574.722	51.8238	96.1124	507.899	1165.64	58.9716	1295.7	1020.39	291.163	357.763	188.149
113157	RPLP0P2	non-coding	62.2066	56.2329	67.3834	205.195	75.2809	25.6552	113.449	73.1145	116.959	93.2358	67.2176	139.677	138.418	119.339	29.9925	173.452	96.5337	172.94	39.823	22.9634	13.2571	83.1798	60.8804	55.3732	52.4697	15.8022	26.7451	47.6	27.8146	71.4931	311.211	33.5766	35.9411	36.3711	197.931	79.542	110.249	77.1902	170.956	120.106	25.6902	646.53	36.4029	46.5238	134.829	100.495	81.1851
113691	TUBA3FP	non-coding	7.6369	15.4047	9.0613	2.2857	23.382	15.5966	2.3565	2.9246	11.7194	15.5941	12.5565	13.9844	5.2785	12.494	8.2826	12.2424	5.4305	9.8338	3.4071	12.0339	8.9784	8.7944	9.0353	2.4376	38.8306	11.6878	6.0899	2.56	9.2892	1.0202	26.991	8.5839	6.0976	3.2857	23.5969	2.1814	5.7598	8.2891	16.1766	8.4192	8.9801	62.5387	7.8667	10.4548	54.215	12.1226	7.526
114036	LINC00310	non-coding	4.6948	3.1681	4.8764	12.616	23.5955	1.7693	2.0199	0.6358	5.1669	9.1408	4.9587	1.6694	7.2639	8.1857	0	2.9841	13.4178	3.0519	5.3097	2.187	2.3395	7.6336	4.3709	2.8543	13.1174	2.0484	14.9773	4.8	2.2075	6.828	2.2422	1.9465	3.718	5.7213	28.0702	3.8566	4.192	3.2731	3.4111	0.3925	0.7669	6.4725	5.553	6.7956	8.8748	6.604	6.541
114038	LINC00313	non-coding	0	0	0.4433	0.7421	0	0	0	0	1.8789	0	0	0	0.8071	0.4308	0	1.119	0	1.3564	0	1.0935	0	0.2632	0.6244	0	0	0.5853	1.3373	0	0	14.4593	1.7937	0.4866	0	0.8173	0	0.7231	0.8384	0.2728	0.4013	0.3925	0.7669	0	0	0	0	1.4356	0.3848
114041	B3GALT5-AS1	non-coding	0	12.2762	0	158.442	11.236	0.8847	1.0099	4.7683	0.4697	0	7.7135	10.0167	1.6142	1.7233	1.1536	17.9048	1.4909	47.8128	6.1947	3.8272	21.3153	1.3161	2.1855	1.4271	2.1354	4.0969	42.7922	0	0	0	0	1.9465	15.4919	0	11.1561	0.7231	1.6768	49.6417	0.4013	0	0.3834	111.83	0	3.6592	1.024	22.6832	23.4706
114043	TSPEAR-AS2	non-coding	2.7387	2.376	8.8662	0.7421	32.5843	0.8847	12.7925	0.3179	4.2274	3.6563	0	32.8325	22.5989	0.8617	11.5356	3.3571	0.3727	11.1902	6.1947	0.5467	8.5781	11.582	0.3122	12.5589	1.2202	1.4632	2.4071	0.8	2.2075	11.6478	13.0045	13.1387	0.6197	0.8173	0.3599	22.1754	1.6768	1.6365	46.3506	4.71	2.3006	2.5171	19.7439	0.5227	3.7547	1.7228	3.4629
114044	MCM3AP-AS1	non-coding	11.8505	25.6177	21.3986	22.1262	30.1124	4.0429	27.6081	17.4235	42.1476	25.8867	33.438	16.9338	21.2107	20.8434	27.1202	38.4952	16.3026	33.5402	34.0354	25.2652	45.2015	17.981	19.7846	27.6438	34.7459	22.8956	83.6587	39.108	24.6711	26.0709	48.8924	55.3285	32.4276	88.1488	14.1682	83.4902	8.0025	41.1263	35.7121	15.8454	13.217	32.9702	78.4328	26.644	81.2184	17.6786	18.3032
114599	SNORD15B	non-coding	0.3912	0.396	0.4433	0.3711	0	0.8847	0.6733	0	0	0	0	0	0	0	0	0	1.4909	0	0	0.2734	0	0.2632	0.3122	0	0	0	0	0	1.3245	0	0.8969	0	0.6197	0	0.3599	0.241	0.4192	0	0.4013	0	0.7669	0.7192	0	0	0	0.2871	1.5391
114614	MIR155HG	non-coding	14.867	20.1963	27.042	74.2115	17.9775	11.0583	4.713	7.9472	20.1978	95.064	43.5262	25.5982	18.1598	71.5172	32.2996	10.8175	75.2889	32.2143	33.6283	25.6971	7.5383	10.2659	5.3075	2.8543	43.318	6.4379	15.2447	15.6	11.479	3.6148	5.8296	20.438	9.2951	6.13	29.5097	59.536	28.5056	10.9103	33.9102	57.698	66.3344	5.0342	324.541	104.548	36.182	63.7427	30.7811
114796	PSMG3-AS1	non-coding	73.1612	297.005	42.5579	115.399	84.2697	179.586	53.5263	71.2072	147.021	197.441	68.3196	40.0668	232.042	471.755	86.5169	138.762	23.8539	111.902	38.0531	129.852	73.3039	173.993	132.688	111.888	86.636	33.0675	59.3742	44.8	107.285	95.9936	82.9596	27.2506	54.5314	68.2468	93.5673	29.4064	56.1727	76.9174	55.9819	24.7277	12.6534	244.876	40.7219	42.3419	91.4791	88.1487	78.107
114814	GNRHR2	non-coding	161.561	261.408	200.833	205.707	164.742	370.258	388.712	121.17	595.036	275.32	355.03	274.78	510.702	203.204	207.248	227.439	292.348	217.599	414.372	288.275	175.669	281.55	322.001	162.951	254.161	170.874	401.92	98.716	192.481	401.711	462.556	166.005	500.425	395.317	197.423	294.561	150.111	468.85	364.721	126.677	170.936	820.047	229.992	326.827	155.613	296.596	257.495
114819	CROCCP3	non-coding	14.867	19.8003	69.5999	57.1429	57.3034	8.8466	23.9017	17.8018	31.0012	71.298	45.73	24.4853	94.8345	25.8496	12.6891	27.6032	14.536	30.1797	48.6726	19.1361	23.6548	27.9021	27.7865	17.6966	36.6068	12.8759	117.411	40	47.6821	38.9597	88.3408	73.9659	45.8559	53.5349	22.6721	33.9861	8.8032	56.7334	30.9004	45.1379	19.5552	134.484	34.5519	19.8641	59.7345	30.7228	23.0858
114915	EPB41L4A-AS1	non-coding	255.869	172.659	213.233	134.694	211.236	285.303	241.71	221.887	166.279	301.645	154.27	165.832	159.806	275.729	227.251	113.024	165.114	79.0098	115.929	143.248	166.363	103.448	312.519	125.018	190.965	191.382	123.83	150.8	204.415	277.94	162.332	271.533	648.799	184.307	204.049	286.833	210.019	177.565	92.7013	191.542	151.074	419.993	401.666	393.1	221.188	222.238	143.517
115110	LOC115110	non-coding	26.2089	23.9901	55.7287	200.798	59	26.3231	8.8706	21.5084	89.0158	284.406	84.4022	23.0384	104.108	102.386	52.4639	45.631	52.2661	71.6141	34.8496	40.7709	23.1115	39.3051	20.0593	36.8717	36.9271	7.983	27.5047	34.46	59.2494	62.2392	76.0717	26.146	43.1418	55.4802	71.8704	43.3384	25.9317	29.1577	25.1678	46.1662	36.7638	330.867	71.9667	39.3152	38.8377	90.4486	35.2943
116123	FMO9P	non-coding	0.3912	17.0283	5.3197	9.6475	40.4494	32.7325	4.3764	20.027	5.6366	0	25.3444	9.4602	0	0.8617	0	12.3095	42.117	10.1729	46.0177	7.1077	35.6122	0.2632	27.7865	3.996	0	8.779	0	18	19.8675	2.0082	10.3139	29.6837	19.8296	8.9906	12.2357	0.241	18.4448	0	0.8026	1.1775	0.7669	0	0	0.5227	0.6827	8.6139	6.541
116349	EXOC3-AS1	non-coding	81.7684	135.434	57.1872	65.6772	197.753	190.202	259.216	86.7838	98.6403	53.0165	135.537	146.355	164.245	66.7781	268.779	210.008	120.015	103.425	223.894	91.5801	214.713	217.162	182.329	194.092	35.3865	170.898	161.006	95.2	164.68	86.3541	97.7578	222.871	45.8559	245.607	137.112	35.4324	100.189	118.104	116.779	94.2008	164.11	288.026	133.889	224.778	300.721	145	455.945
116437	LINC01257	non-coding	0.7825	0	0	0	19.1011	0	0	0.6358	0	0	0	0	7.2639	0	0	0	0	0	0	0	0	0.2632	0.6244	0.2854	0	0	3.7443	0	0	2.0082	0	0	0	2.0433	0	1.6873	0	11.4558	106.747	0.785	0	0	13.574	3.1364	0	0.2871	0.7695
116828	N4BP2L2-IT2	non-coding	13.302	18.6123	39.4547	66.7904	44.9438	8.8466	6.3962	31.471	61.063	62.1572	39.6694	13.9121	56.4972	26.2804	38.0674	19.3968	5.218	28.4842	32.7434	13.942	12.2173	11.582	14.986	9.4192	13.4225	3.5116	28.0824	20	19.426	32.5334	30.4933	65.2068	76.22	47.405	20.1529	37.6017	9.2224	21.275	14.0456	46.3154	30.6748	41.352	51.8279	31.8871	33.7927	21.5347	20.0077
116933	CLRN1-AS1	non-coding	0	0.792	0	0.7421	8.9888	0	1.0099	0	0	0	0	0	0	0	1.1536	0	0.7454	0	0	2.187	1.5597	0	0.3122	0	0.3051	1.7558	0.8024	0	0	0	0	1.9465	5.5771	0.8173	0	0	0	2.4548	0	0	0	0	3.085	2.6137	0	0.5743	0
117852	TRIM78P	non-coding	2.8717	3.9007	13.8845	26.2041	17.9775	2.1763	2.1781	7.6866	12.0905	18.2815	11.5978	6.7279	21.0291	4.0153	1.4073	2.1635	5.2926	4.5439	3.7699	4.9809	1.5649	2.7534	2.2135	1.684	6.9217	1.0008	4.9532	5.084	4.9095	7.0489	13.3722	6.6813	14.9342	2.546	4.3761	10.2175	4.498	9.2001	3.9147	10.1384	16.1158	2.5135	7.4657	8.3743	7.3047	6.4173	2.7626
118421	LINC00161	non-coding	0	1.188	0	4.4527	3.3708	0	0	0.9537	0.9394	1.8282	0	0.5565	1.2107	0	0	2.9841	1.1182	0.3391	0.885	0.2734	0.2599	0.5265	0.3122	0.5709	0	0.2926	0.2675	0.8	3.9735	0	3.5874	5.3528	0	0	0	6.9901	0.4192	0.2728	1.2039	0	0	0	0.617	0	0.3413	0.5743	0.7695
118425	PCAT4	non-coding	0	0	0	0	14.6067	0	0	0	0	0	0	0	0	0	0	0	0	0	0	0	0	0	0	0	0	0	0.2675	0	0	0	0	0	0	0	0	0	0	0.2728	0	0	0	0	0	0	0	0	0
118432	RPL29P2	non-coding	0.7825	0.396	0	0.7421	1.1236	0	0.3366	0.3179	1.8789	0	0	0.5565	1.2107	0	0	0	0	0.6782	0	0	0	0	0	0	0	0.2926	0.8024	1.2	0	0	1.3453	0.9732	0	0.8173	0	0.7231	2.096	0	0.2007	0	0.3834	0	0.617	0.5227	0	0.5743	0.3848
118433	RPL23AP7	non-coding	149.061	54.2529	64.2802	65.6772	95.5056	127.834	231.274	181.197	64.8208	38.3912	84.2975	91.2632	65.3753	69.7939	43.8352	184.643	150.205	50.5256	171.681	125.205	96.6987	110.029	89.9157	347.938	107.685	68.4761	115.539	41.2	103.753	52.2141	75.7848	120.681	35.3215	71.1075	86.7296	183.429	470.761	143.197	171.156	142.086	68.2515	138.799	87.6138	262.938	122.882	97.624	107.734
119369	NUDT9P1	non-coding	1.1737	3.5641	4.4331	4.4527	11.236	1.7693	3.3664	0.6358	4.6972	10.9689	2.7548	0	2.8249	3.0158	4.6142	1.119	1.8636	2.0346	2.6549	3.8272	20.5355	3.422	0.9366	0.8563	1.2202	2.6337	5.6165	3.6	5.298	8.8362	4.0359	1.4599	4.3377	6.9473	3.9586	1.4462	2.096	1.3638	3.6117	4.3175	2.684	14.7429	2.468	6.2729	15.3603	6.0297	5.7715
121838	LINC00284	non-coding	1.1737	0.396	0.4433	0	20.2247	7.5196	1.6832	0.6358	0.4697	9.1408	12.6722	0	0.8071	8.1857	1.1536	11.5635	14.1633	0.6782	0	3.5539	0.7798	26.0595	0.9366	0.2854	1.8303	8.779	122.76	0	0.4415	0	0	0	0	0.8173	6.1179	1.6873	0.4192	0	0	0.785	0.7669	0	0	14.114	2.3894	54.2675	2.3086
121952	METTL21EP	non-coding	0	1.188	0	0.3711	10.1124	0.4423	0.3366	2.2252	0.9394	0	1.6529	0	3.2284	0.4308	0	0.373	0.3727	1.3564	0	1.0935	0.7798	0.5265	0.3122	0.2854	0.6101	0.2926	0.2675	0	0.883	0.4016	0.4484	0	0	0	0.7197	0.241	0	2.1821	0.2007	0.785	0	2.5171	1.234	1.5682	0	0.2871	0.7695
123346	HIGD2B	non-coding	1.1737	0.396	0	0	2.2472	2.2117	0	0	0	1.8282	1.6529	0	0.4036	1.2925	1.1536	0	0.3727	0	0	0.2734	0.5199	0.2632	0.3122	0.5709	0.3051	0.2926	0.5349	0	0.4415	1.2049	0.4484	0	1.859	0	0.7197	0	0.4192	0	0.8026	0.3925	0	1.7979	0	0	0	0.8614	0.3848
124149	ANKRD26P1	non-coding	0	0	0	0.3711	43.8202	0	1.0099	0.3179	0	0	0	0	11.2994	0.8617	0	0	0	0.3391	0	0	0.5199	0	0.3122	0.5709	0	0	2.4071	0	2.649	0	0.4484	0	0	0	0	0	0	0.2728	0	0.785	0	0	0	0	0	0	45.7868
124221	PRSS30P	non-coding	2.3474	0	0.4433	0.7421	0	1.7693	0.3366	0	2.3486	3.6563	0	11.6861	1.2107	3.8774	0	0.746	1.1182	0.3391	3.5398	1.9136	1.2997	0.2632	0.9366	1.1417	1.5253	1.1705	0.5349	0.4	2.2075	0.4016	0	1.4599	0.6197	0.4087	1.4395	0.7231	16.768	0	0.602	5.1025	0.3834	8.63	11.106	5.7501	1.024	2.5842	0.7695
125144	LRRC75A-AS1	non-coding	18133.8	13034.2	3590.82	3356.22	5073.03	7558.55	6339.34	7354.68	5542.18	5575.87	3050.14	5774.07	6262.31	7477.42	10523.9	5650.81	8088.33	3237.37	7561.06	8415.25	4580.97	6558.3	16981.6	7384.9	6189.9	7352.7	2231.88	4951.2	3387.2	6612.71	2421.97	6783.94	6647.87	5619.13	7337.47	8635.85	30223.4	3963.7	3397.44	9467.18	5345.48	16670.3	67118.9	40184	6070.05	4818.61	6500.96
126536	LINC00661	non-coding	1.1737	1.98	0	0	19.1011	0	0	0.3179	0	0	1.1019	0	0	0	0	0	0	0	0	0.2734	4.679	0	0.3122	0	0	0	0	0	0	0	0	0	0	0.4087	0	0.9641	0	13.9106	3.6117	0.3925	0	0	0	0	0	0	0.3848
126661	CCDC163P	non-coding	14.4757	54.6489	7.9796	6.679	33.7079	23.4435	13.4657	14.9408	6.576	54.8446	20.9366	19.4769	40.3551	6.4624	18.4569	10.0714	33.5445	10.512	29.2035	13.1219	3.3793	44.7486	9.054	38.5329	34.1663	47.9918	44.6643	17.6	6.181	21.6889	8.5202	9.2457	6.1967	47.8136	26.9906	14.7032	18.864	82.9181	50.9656	23.1577	24.9233	49.6224	138.825	116.571	57.6865	26.703	28.4725
127841	LINC00628	non-coding	0.7825	0	0	0.7421	7.8652	10.1736	0.3366	1.9073	0	1.8282	0	0	0.8071	3.4466	0	0	2.9817	0	0	0.2734	0	0	0.9366	0.8563	0	0.8779	0	1.6	0.4415	194.799	0	1.4599	0.6197	2.8606	0	0	0.8384	0.2728	0	2.355	0.3834	0	3.085	2.6137	0.3413	0.8614	0.7695
128439	SNHG11	non-coding	210.266	188.281	190.903	200.056	190.202	196.762	123.265	133.923	175.486	182.45	136.061	163.829	206.13	134.685	154.577	147.36	277.447	112.102	211.522	139.888	316.532	431.216	182.666	192.99	112.578	257.845	285.772	143.672	371.276	98.0058	216.049	117.494	200.242	124.181	196.66	171.336	297.045	212.524	140.681	180.704	161.423	290.385	471.689	457.815	210.433	162.355	113.571
128854	TSPY26P	non-coding	4.6948	29.7005	25.7121	12.987	31.4607	11.5006	86.8541	10.8082	24.4252	29.2505	22.0386	10.0167	46.0048	14.2173	19.6105	22.3809	31.681	39.6745	33.6283	31.4379	42.3707	246.907	4.3709	61.3672	32.9461	16.6801	84.5146	11.6	36.6446	8.0329	50.2242	21.8978	5.5771	80.0981	18.3536	42.9045	22.6368	78.2812	45.1467	21.5877	42.5613	102.481	3.702	24.5687	30.3793	15.505	65.4098
128872	HMGB3P1	non-coding	0	0	0	0.3711	7.8652	0	0	0	0	0	0	0	0	0	0	0	0	0	0	0	0	0	0	0	0	0	0.2675	0	0	0	0.4484	0	0	0	0	0	0.4192	0	0	0	0	0	0	0	0	0	0
129790	C7orf13	non-coding	210.485	62.5691	80.2394	77.9221	780.899	125.18	162.935	32.1068	53.0779	232.175	152.066	210.351	276.433	200.765	227.251	103.325	148.714	125.805	115.929	55.4948	263.582	678.6	43.3968	224.347	184.864	114.419	738.7	286	270.64	132.945	245.74	243.796	388.536	754.802	66.5767	150.648	78.8095	302.214	337.898	48.2779	57.8988	422.15	104.89	180.868	260.442	208.169	217.391
132200	C3orf49	non-coding	0	0	0	0.3711	2.2472	0	0.3366	0	0.9394	0	0	0	0	0	0	0.373	0	0.3391	0	0	0.5199	0	0.3122	0	0.3051	0.2926	0.2675	0	0	0	0.4484	0	0.6197	0	0.3599	0.4821	0.4192	0	0	0	0	0.3596	0.617	0	0	0	0.7695
132241	RPL32P3	non-coding	39.3936	137.866	263.531	143.41	164.517	42.2869	155.055	39.2975	171.517	200.731	157.758	140.367	397.542	80.2931	187.165	126.217	97.9165	160.912	231.761	80.2324	130.86	60.9239	119.163	95.1905	172.064	124.518	211.527	326.48	166.243	240.173	301.574	162.292	338.801	604.438	96.5722	112.851	66.9755	288.642	112.11	153.151	78.125	97.7634	312.861	281.187	289.146	86.6987	126.295
134466	ZNF300P1	non-coding	7.8247	25.3444	8.8662	31.1688	35.9551	4.8656	2.3565	2.861	12.2126	27.4223	7.7135	2.7824	20.1776	47.3909	1.1536	5.2222	7.8271	6.1038	5.3097	2.187	2.3395	7.6336	5.9319	1.4271	11.2871	0.8779	2.942	3.2	0.883	0.4016	3.5874	0.9732	6.1967	4.4953	9.3567	12.7749	12.9952	12.5468	6.8222	5.495	6.5184	84.1424	13.574	20.9096	7.8508	13.4951	8.08
138649	ANKRD19P	non-coding	15.6495	52.2729	21.279	30.4267	59.5506	34.9442	41.7438	29.2458	34.759	32.9068	38.5675	28.9371	28.2486	21.5413	9.2285	40.6587	13.7905	51.2038	37.1681	22.69	43.1505	20.2685	48.7043	19.1237	17.3882	47.4065	33.9663	28.4	158.499	126.92	188.341	108.516	181.565	21.2505	13.6752	99.7891	33.9551	17.4564	45.1467	33.3628	18.4049	13.3046	49.3599	46.001	18.4324	35.8912	26.5487
139420	PPP4R3CP	non-coding	0	0	0	0.3711	8.9888	0	0	0.6358	0.4697	12.7971	0	0	0	0	2.3071	1.119	0	0	0	0	0	0.5265	0	1.4271	162.595	0.2926	0	0.4	0	0	0	0	0	11.4426	0	0.4821	0	0	0	0	0	0	351.689	0	0	2.5842	53.8669
139538	VENTXP1	non-coding	0	0	0	0	15.7303	0	0	0	0	0	0	0	0	0	0	0	0	0	0	0	0	0	0	0	1.5253	0	0	0	0	0	0	0	0	0	0	0	0	25.9119	0.4013	0	0	0	0	0	0	0	0
140464	PISRT1	non-coding	0	0	0	0	1.1236	0	0	0	0	0	0	0	0	0	0	0	0	0	0	0	0	0	0	0	0	0	0	0	0	0	0	0	0	0	0	0	0	0	0	0	0	0	0	0	0	0	0
140771	SMCR5	non-coding	0.3912	0.396	0	0.7421	22.4719	0	0	0.6358	2.3486	0	1.6529	0	0.8071	0.8617	0	0.373	0	0.3391	0	0.2734	0.7798	1.5794	0.3122	0	0	0.2926	0.8024	0.8	0	0.4016	0.4484	1.4599	1.2393	1.226	0	1.6873	0.4192	0.2728	1.0033	1.1775	0	3.5958	0	1.0455	0.3413	0	1.5391
140828	LINC00261	non-coding	5.0861	3.1681	14.186	35.2505	69.6629	38.9251	0.3366	14.9408	103.337	87.7514	1.1019	11.6861	119.855	181.378	5.7678	23.5	0.7454	103.086	7.0796	4.1006	21.5753	13.6878	0.9366	78.7784	25.9298	4.9748	0.5349	2.4	31.7881	51.0091	0.4484	2.4331	0	10.6253	58.6595	3.8566	35.2127	49.369	5.6183	4.3175	0	131.967	1152.55	2.6137	802.149	10.9109	33.4744
140875	LINC00028	non-coding	0	0	0	0	0	0	0	0	2.3486	1.8282	0.551	0	0	0	0	0	0.7454	0	0	0	0	0	0	0	1.5253	0.2926	0	0	0	0	0	0	0.6197	0	0.3599	0	0	0	0	0	0	0	1.851	0.5227	0	0.2871	0
142913	CFL1P1	non-coding	0.3912	0	0.8866	0.7421	15.7303	0.4423	2.3565	0	0	0	2.2039	0	6.0533	0.8617	0	2.2381	0.7454	2.0346	4.4248	1.0935	2.0795	1.3161	1.561	0.8563	1.8303	3.219	4.0118	2.4	1.3245	0	0	1.4599	0	0.8173	0.3599	2.8924	1.2576	0.8183	2.6085	1.9625	0.7669	3.2362	0	2.091	3.7547	2.297	1.1543
143188	LOC143188	non-coding	8.9984	8.7121	17.2891	16.6976	57.3034	12.3853	17.1688	6.3578	18.3189	12.7971	13.7741	24.4853	30.2663	13.3556	14.9963	14.5476	6.7089	9.8338	15.9292	10.3882	17.1562	12.3717	17.1714	7.992	18.9135	23.118	15.7796	10	22.5166	11.2461	8.9686	14.1119	13.6328	68.6555	10.0765	8.9183	7.5456	9.2737	16.4535	23.5502	9.5859	14.0237	38.2539	14.6367	11.9469	14.9307	12.3124
143666	LOC143666	non-coding	9.7809	31.6805	6.2064	21.5213	38.2022	38.9251	37.7041	27.3385	14.0915	12.7971	42.4242	54.5353	23.406	10.3398	27.6854	19.0238	7.0816	33.2316	53.9823	14.7622	28.8537	62.6481	34.655	47.6666	8.5416	26.337	74.6189	17.6	95.8057	56.6322	31.3901	108.029	78.6987	65.3862	10.4363	25.3088	9.6416	41.459	19.6639	4.71	9.5859	27.3283	5.553	42.3419	12.6296	19.8119	25.7791
144486	CEP83-AS1	non-coding	17.6056	6.3361	12.4127	10.3896	30.3371	5.308	19.5253	6.3578	14.0915	3.6563	9.9174	23.9288	15.3349	10.7707	59.9851	8.2063	18.6359	4.7474	19.469	4.9207	9.8778	11.3188	4.9953	3.996	10.677	14.6316	50.8157	5.2	5.7395	10.8445	4.4843	17.0316	7.4361	40.4577	8.2771	7.9542	10.8992	16.3654	7.6248	5.8875	46.7791	85.2211	17.276	107.684	33.4513	10.9109	60.7926
144571	A2M-AS1	non-coding	26.6471	37.2365	37.2648	38.3006	30.4157	24.4521	50.9073	6.059	31.4991	38.4278	27.0028	10.0501	53.7248	21.5542	38.0905	31.3855	44.7633	14.2625	38.0708	36.3915	53.0855	31.1003	22.8661	18.5871	55.8497	33.3953	71.8427	17.636	35.0861	11.3666	22.0628	6.8564	6.8908	50.3351	40.691	13.7535	35.2756	30.3033	14.9085	8.2504	21.4916	83.078	64.5997	62.5666	81.3959	27.2974	28.8957
144742	LINC00934	non-coding	0	0	0	0	20.2247	0	0	0	0	0	0	0	0	0	0	0	0	0	0	0.2734	0.2599	0	0	0	0	0	0.8024	0	0	0	0	0	0	0	0	0	0	0	0.2007	0	0	0.3596	0	0	2.7307	0.2871	0
144776	LINC00410	non-coding	0.3912	0	0	0	8.9888	0	0	0	0	0	0	0	0	0	0	0	0	0	0	0	0	0	0	0	0	0	0	0	0	0	0	0	0	0	0	0	0	0.5455	0	0	0	0	0	0	0	0	0
145165	ST13P4	non-coding	345.07	311.657	367.949	260.482	295.506	384.828	366.268	293.412	292.163	188.3	384.573	361.158	240.113	245.571	342.607	456.944	244.502	260.766	373.451	424.549	637.64	354.304	414.611	431.854	326.715	419.636	453.865	377.2	353.201	395.22	320.179	247.202	345.159	275.439	305.173	418.68	378.537	435.32	326.461	215.484	186.733	248.831	219.034	371.668	248.154	298.615	287.034
145200	LINC00239	non-coding	9.3897	5.5441	2.6599	20.7792	5.618	8.8466	3.0298	2.861	5.6366	25.5941	8.2645	17.8075	10.8959	11.2015	5.7678	5.5952	8.9452	13.2248	8.8496	9.8414	1.5597	3.1587	2.4977	2.2834	5.186	6.1453	16.0471	4	3.9735	78.7228	2.6906	1.9465	12.3935	2.8606	8.9969	4.8207	11.3184	1.091	2.4078	14.1301	29.5245	34.52	37.6369	98.7977	14.3363	9.4753	8.08
145241	ADAM21P1	non-coding	0	0.396	0.4433	0.7421	19.1011	0.8847	0.6733	0	1.8789	1.8282	1.1019	0	2.8249	0.4308	0	0	2.9817	0.6782	0.885	0	1.2997	4.4749	0.3122	0.2854	11.2871	0.2926	4.0118	0.8	0	0	1.7937	0.4866	0.6197	1.226	0.7197	4.5797	0.8384	0.8183	2.2072	0	0.3834	1.7979	7.404	0	1.024	0.5743	0.3848
145474	LOC145474	non-coding	0	0	0	0	15.7303	0	0	0.6358	0.4697	0	0	0	0	0	0	0.746	0.3727	0.3391	0	0	0	0	0	0	0	0	0.2675	0	0	0	0	0	0	0	0.3599	0.241	0	0	0.602	1.1775	2.3006	0.7192	0.617	0	1.024	0	0.7695
145624	PWAR1	non-coding	0	0	0	1.1132	31.4607	0	0	0	0.4697	1.8282	1.1019	0	0	0.4308	0	0	0	0.6782	0.885	0.2734	0	0	0.6244	0.2854	0.3051	0	0	0	0	0	0	0	0	0	0.3599	0	0	1.091	0.602	0	0.7669	2.5171	0	0	0	0	0.3848
145783	LOC145783	non-coding	19.4836	40.0284	74.104	33.1503	60.8202	38.7526	52.5299	6.4055	47.0514	55.6673	22.1873	24.8136	28.6199	25.2637	105.332	32.803	61.748	21.2174	92.4779	72.6189	54.5802	73.1245	28.2235	63.5422	69.8183	60.379	82.8082	30.876	77.426	44.6872	34.3318	16.1265	34.8257	53.6208	43.3756	22.1127	54.542	113.265	135.609	33.2529	47.8643	55.1277	68.2092	96.6074	113.663	48.7287	49.6191
145820	LINC00924	non-coding	4.6948	4.3561	0.8866	8.9054	20.2247	15.4816	0.3366	5.722	31.4709	9.1408	18.7328	4.4519	9.6852	27.1421	4.6142	11.9365	12.2997	5.0865	6.1947	3.5539	0.5199	5.791	4.9953	3.7106	6.4062	5.8527	1.8722	0.4	1.3245	0.8033	0.4484	0	1.2393	1.226	19.7931	1.2052	11.3184	1.6365	1.4046	1.1775	5.3681	4.315	3.702	0	29.0139	21.5347	11.9277
145837	DRAIC	non-coding	0.7825	1.584	2.6599	2.5974	31.4607	3.5386	2.0199	0.6358	1.4091	34.7349	1.1019	3.8954	4.0355	4.7391	5.7678	4.8492	8.9452	2.0346	5.3097	1.0935	2.0795	5.0013	2.1855	0.8563	2.7455	1.4632	2.1396	1.6	3.0905	1.6066	1.3453	2.4331	0	2.8606	5.3981	15.4263	2.096	58.37	1.8059	1.1775	4.9847	1213.59	4.319	3.6592	1.024	2.5842	5.7715
145845	LOC145845	non-coding	0	0	0	0	14.6067	0	2.0199	0	0	0	0	0	0.4036	0	0	0	0	0	0	0.2734	0.2599	0.2632	0	0.2854	0.3051	0	0	0	0	0.4016	0	0	0	0	0	0.241	0	0.8183	0	0	0	0	0	0	0	0	0.7695
145978	LINC00052	non-coding	0	0	0	0	10.1124	0	0.3366	0	7.0457	0	0.551	0	0	0	1.1536	0	0	1.0173	5.3097	0.8201	0	0.5265	0.3122	0.8563	0.3051	0	0.8024	0	0.883	0	0	0	0	0	0	0.241	0	0	0	0.785	0	26.2496	0	0	0	0	0
146336	SSTR5-AS1	non-coding	3.1299	1.188	0	0.7421	23.5955	0	1.0099	3.8147	0	0	3.8567	0	0.8071	0	1.1536	0	4.0999	0.6782	0	0.5467	0	1.0529	25.9132	3.996	0.6101	3.219	0.5349	0	0	1.6066	2.6906	0.9732	1.2393	44.5443	0.7197	42.6635	0	21.5478	9.0293	4.71	0	0.3596	0	0	0	0	47.3259
146481	FRG2DP	non-coding	0	0	0	0	17.9775	0	0	0	0	0	0	0	0	0	0	0	0	0	0	0	0	0.2632	0	0	0	0	0	0	0	0	0	0	0	0	0	0	0	0	0	0	0	1.0787	0	0	0	0	0
146512	FLJ30679	non-coding	2.3474	1.98	0.4433	1.8553	14.6067	0.4423	3.0298	0.6358	2.8183	0	1.6529	0.5565	1.6142	1.2925	2.3071	8.9524	0.3727	0.3391	13.2743	1.3669	3.1193	0.5265	0.6244	1.1417	0	1.1705	1.8722	1.2	2.2075	1.6066	2.6906	2.9197	1.2393	2.0433	1.4395	0.4821	2.9344	0.2728	0.8026	2.355	5.3681	0.3596	0.617	1.0455	5.4614	0.8614	2.6933
146771	TCAM1P	non-coding	13.302	8.3161	3.1032	7.0501	24.7191	7.962	5.7229	4.1326	19.7281	3.6563	0	48.9705	54.0759	38.3436	2.3071	1.4921	63.7346	0	39.823	3.8272	7.0185	11.0555	0	1.1417	3.9657	3.8042	67.9326	5.6	3.0905	0	21.5247	28.7105	16.1115	78.4634	1.4395	18.5598	0.8384	23.7298	76.4485	8.6351	4.9847	2.5171	1.234	4.7047	217.434	49.6734	74.2593
146880	LOC146880	non-coding	439.319	401.412	573.517	707.985	199.326	175.154	148.857	377.722	328.665	588.062	242.926	529.004	527.978	279.529	239.883	254.296	394.853	310.746	461.903	240.109	290.756	215.383	275.854	216.715	136.656	142.717	370.899	763.82	582.075	802.542	373.265	874.053	1026.68	213.094	216.036	345.253	142.913	367.534	339.405	295.469	459.44	661.719	205.695	387.569	289.852	310.64	191.72
147081	CRHR1-IT1	non-coding	19.1706	41.9767	91.3222	56.4007	62.9213	25.6552	66.3188	97.2741	71.3968	42.0475	60.0551	51.7529	93.6239	15.0789	91.1312	58.9365	18.6359	175.314	49.5575	56.0416	153.626	28.955	48.0799	47.6666	41.4877	52.9666	60.1765	52.8	126.269	53.8207	41.2556	142.093	122.076	44.1357	44.9843	139.078	25.5712	117.558	100.928	35.3253	49.8466	208.918	19.7439	41.8191	80.2149	53.1189	41.9392
147172	LRRC37BP1	non-coding	422.926	477.584	728.361	357.699	360.674	214.531	479.044	333.784	449.988	561.243	400	481.914	446.328	439.012	810.952	403.976	203.131	366.565	488.496	551.941	606.707	354.304	481.424	547.738	540.865	257.224	599.893	340.4	633.996	400.04	520.179	630.657	588.071	220.678	412.416	540.645	339.551	379.132	378.43	314.788	381.902	838.907	424.495	697.857	507.573	352.308	338.592
147429	AQP4-AS1	non-coding	10.1721	0.792	7.5363	1.4842	20.2247	23.4435	0	0.9537	4.2274	16.4534	3.8567	1.113	5.6497	26.2804	35.7603	33.5714	10.0634	1.3564	50.4425	4.374	5.9787	16.8465	0.3122	7.4212	0.3051	29.8486	10.1631	1.2	0	0.8033	4.9327	8.7591	0	1.6347	16.1943	1.9283	2.5152	31.367	0.2007	0	0	4.6746	14.808	3.1364	0	2.5842	8.8496
147525	LINC00526	non-coding	75.1174	60.589	24.3821	36.7347	83.1461	37.1558	114.459	57.8558	41.335	38.3912	74.3802	25.5982	39.9516	56.0074	126.891	30.2143	99.1428	40.0136	109.734	32.5314	109.956	61.5952	35.9038	54.5169	29.8955	60.2824	138.272	15.6	60.4857	73.5014	57.8475	101.216	45.2363	88.68	39.2263	34.9503	62.4607	82.6453	80.4615	29.8302	42.9448	219.346	140.676	187.141	176.131	45.6536	261.254
147727	ILF3-AS1	non-coding	332.942	479.96	398.537	549.536	286.517	324.671	300.623	309.624	336.316	371.115	567.493	310.517	252.623	253.757	2079.87	509.166	1575.48	338.081	1256.64	367.687	756.174	252.961	414.299	520.051	285.533	910.966	748.863	303.6	823.841	432.574	328.251	904.623	259.024	897.017	245.434	369.991	295.536	359.493	289.34	220.194	471.242	1028.05	246.182	840.042	445.79	419.783	1268.56
147804	TPM3P9	non-coding	100.156	205.131	148.066	156.586	123.596	92.0049	139.707	172.932	280.89	166.362	250.689	88.4808	218.321	130.971	674.832	149.206	97.6519	183.791	205.31	139.967	171.562	370.887	95.2232	264.307	274.856	99.7878	193.1	116.8	298.455	83.1409	361.883	179.562	390.395	200.654	105.443	249.473	120.31	22.6388	105.342	237.072	215.491	59.3312	364.029	396.236	98.3059	288.852	145.825
147947	ZNF542P	non-coding	187.011	89.8935	115.261	260.853	88.764	432.6	374.684	217.436	328.801	182.815	791.736	61.2131	467.716	474.771	80.7491	90.2698	550.876	96.982	296.46	57.4084	24.6946	347.986	236.653	161.838	288.888	27.2149	385.13	135.2	304.636	61.0503	14.7982	5.8394	8.0558	489.988	220.963	32.781	405.366	20.184	448.457	44.7454	106.978	792.161	865.032	354.94	564.576	222.812	749.904
148046	CIRBP-AS1	non-coding	4.6948	12.6722	8.4229	21.5213	32.5843	10.6159	17.5055	18.4376	15.0309	7.3126	13.2231	20.5899	9.6852	6.8932	12.6891	55.2063	9.3179	25.7714	118.584	23.7835	9.6179	25.533	26.2254	105.038	18.9135	19.899	38.2455	20.4	67.5497	41.3696	12.5561	23.3577	17.3509	24.1112	9.7166	18.3188	5.0304	177.292	122.799	5.1025	14.5706	5.7533	5.553	6.2729	25.2592	14.0693	17.6991
148145	LINC00906	non-coding	0.3912	0	0	0.3711	34.8315	0	0	0	0	0	0	0	0.4036	0	0	0	0	0	0	0	0	0	0	0	0	0	0	0.4	0	0	0	0	0	0	0.3599	0	0	0	0	0	0	0	0	0	0.6827	0.2871	0.7695
148189	LINC00662	non-coding	67.6839	73.2612	51.4241	194.805	51.6854	79.6196	87.1907	50.5444	46.0321	38.3912	115.151	23.3723	31.477	36.6203	158.038	66.7698	70.0708	53.2384	98.2301	56.8617	70.3015	78.4417	63.3781	155.27	63.4517	47.6992	44.9318	52	80.7947	4.8198	71.3004	37.4696	39.1758	147.528	80.2519	59.0539	75.8751	100.006	68.623	38.8578	64.0337	63.6462	49.9769	105.593	80.2149	43.2015	105.04
148203	ZNF738	non-coding	255.086	232.456	71.8165	111.688	93.2584	122.083	53.5263	119.209	283.708	102.377	317.906	70.1169	263.115	145.619	48.4495	76.8412	201.267	80.3662	214.159	325.861	69.1448	112.924	88.3547	23.976	205.608	81.0593	455.469	170.8	105.077	82.3376	8.5202	24.8175	122.076	424.602	143.95	177.644	318.591	293.759	661.951	59.6605	57.1319	217.188	399.815	602.718	452.276	89.2973	180.839
148231	LINC00905	non-coding	0	0	0	0	5.618	0	0	0	0	0	0	0	0	0	0	0	0	0.6782	0	0	0.2599	0	0	0	0	0	0	0	0	0.4016	0	0	0	0	0	0	0.4192	0	0	0	0	0	0	0	0	0	0
148413	LOC148413	non-coding	308.693	318.215	279.135	335.395	531.404	503.426	288.699	131.679	333.367	607.898	417.229	362.426	425.04	237.571	266.576	304.288	179.81	221.143	468.965	269.658	263.062	479.113	396.613	482.826	348.435	221.974	520.669	318	442.433	365.731	547.807	456.034	345.351	408.521	340.027	298.736	232.375	642.541	509.446	331.759	219.452	400.669	221.934	508.406	548.192	497.055	275.452
148696	LOC148696	non-coding	0	0	1.7732	2.9685	10.1124	0.4423	0.3366	0	1.8789	1.8282	1.1019	0	3.2365	0.8617	0	1.9844	0.3727	4.0861	0.885	1.099	2.5994	0.2632	0.6244	1.4271	0.3051	0.5853	1.3373	0.8	0	10.4629	67.583	0.4866	11.9535	0.8173	0	2.1693	0.4192	1.3638	0.4013	0	0	3.603	0	1.5682	0.3413	0.2871	1.5391
148709	LOC148709	non-coding	12.9108	3.1681	5.763	12.987	43.8202	25.2129	3.3664	6.9936	9.864	10.9689	22.5895	77.9076	46.0048	5.1699	1.1536	9.3254	42.8625	17.294	56.6372	26.7906	11.1775	78.4417	6.8686	6.5649	2.1354	21.0696	89.3287	11.6	4.8565	4.4181	0	1.4599	8.6754	25.3371	13.3153	0.9641	6.288	78.554	25.8841	2.355	3.8344	7.1917	19.1269	2.091	12.9709	8.6139	8.08
148713	PTPRVP	non-coding	0.7825	3.5641	0.4433	5.1948	11.236	0.8847	0.3366	1.2716	0	14.6252	6.0606	0	2.8249	1.7233	2.3071	0	0.3727	2.0346	3.5398	3.0071	0	0.5265	0	0.2854	1.8303	1.4632	9.3608	4.4	1.3245	0.8033	0.4484	0.4866	3.0984	1.6347	2.5191	2.6514	0	16.6382	1.2039	1.57	0.3834	2.1575	1.851	19.3413	3.4134	4.0198	2.3086
148824	GCSAML-AS1	non-coding	1.5649	0.396	0.8866	7.0501	15.7303	0	0.3366	0.3179	0.4697	0	1.1019	0	1.6142	0.8617	4.6142	1.119	0	5.0865	2.6549	0	0.2599	0.7897	0	1.4271	1.8303	0	0.2675	0.4	0	0	0.4484	0	0	1.226	0.3599	0	0	0.2728	1.4046	2.7475	0	0	0	1.5682	0.3413	2.0099	0.7695
148898	ZNF436-AS1	non-coding	21.9014	46.4595	52.4748	28.8089	82.9326	27.7297	23.3833	22.8785	28.8969	33.0896	54.8926	20.4674	74.1122	13.8554	17.2803	18.2106	41.1293	25.0254	56.9558	18.1165	27.1354	40.4343	27.9831	25.5116	27.4642	12.6505	80.8157	37.036	65.5055	30.3444	75.7399	98.8613	87.6406	49.5627	22.4633	14.561	26.724	70.9304	40.927	34.8033	8.4126	151.65	46.9412	114.668	85.2258	29.3446	29.9538
149047	MGC27382	non-coding	0.3912	0	0.4433	3.7106	11.236	7.0773	0	0.3179	13.6218	7.3126	0	0	27.4415	3.0158	0	1.4921	0	6.4429	0.885	0	0.2599	0.7897	0	2.2834	0.9152	0.2926	0	0	0.4415	3.2132	0	0	0	0	2.5191	0	2.9344	0	0.4013	0	0.3834	0	0	4.1819	0	0	1.9238
149134	LINC01341	non-coding	4.3036	9.5042	6.2064	7.7922	34.8315	7.5196	3.0298	9.8546	10.3337	5.4845	6.0606	4.4519	23.406	3.4466	17.3034	9.3254	12.6724	11.1902	15.0442	19.9563	12.4773	15.7936	15.2982	3.4251	9.7618	6.1453	12.0353	3.2	12.362	2.8115	27.3543	3.4063	14.8722	35.5537	5.0382	116.903	8.384	72.5533	43.5415	3.5325	8.4356	8.9896	42.5729	4.7047	22.8698	25.5545	19.6229
149620	CHIAP2	non-coding	0	0	0	2.9685	16.8539	0.8847	0	0.3179	7.0457	36.5631	0	0	3.632	10.3398	0	0.746	0	0.6782	0	0	1.2997	20.7949	0	0	5.7961	0	0	0	0	0	0	0	0	1.226	1.0796	0	3.3536	0	1.2039	0	1.1503	0	0	0	0	0	2.6933
149775	GNAS-AS1	non-coding	8.6072	3.9601	0.4433	0.7421	2.2472	1.7693	1.0099	0	0.9394	0	1.1019	5.0083	0	0	0	2.9841	7.0816	4.7474	11.5044	4.6473	0	0	0.3122	19.98	7.6264	1.1705	4.8141	0	7.5055	0	0	2.9197	0	11.4426	3.5987	0	2.096	5.1824	5.6183	0	3.0675	1.0787	16.042	23.0005	26.2832	3.4456	1.9238
149830	PRNT	non-coding	0	0	0	0	11.236	0	0	0	0	0	0	0	0	0	0	0	0	0	0	0	0	0	0	0	0	0	0	0	0	0	0	0	0	0	0	0	0	0	0	0	0	0	0	0	0	0	0
149837	LINC00654	non-coding	12.5196	5.1481	18.1758	28.2004	86.5169	15.0393	18.1788	5.0862	14.5612	49.3601	14.876	10.0167	61.3398	31.0195	63.4457	11.9365	14.9087	46.1173	13.2743	20.2296	16.8963	12.8981	10.3028	45.3832	21.9641	7.9011	116.609	3.6	13.6865	11.2461	3.5874	2.4331	0.6197	20.8418	35.2677	10.1235	35.2127	56.1879	18.8613	5.495	39.4939	55.3758	102.422	11.5003	122.541	26.1288	16.1601
149934	NCOR1P1	non-coding	0.3912	0.396	0	0	1.1236	0.4423	1.0099	0	0	0	0	0	0	0	0	0	0	0	1.7699	0	0	25.7963	0	0	0	0	0.2675	0	0	0	1.7937	0	0	0	0	0.9641	0	1.6365	1.4046	1.57	0	0	0	3.1364	0	0	0.7695
149992	ANKRD30BP2	non-coding	0	0	0	0.3711	51.6854	0	0	0.3179	0	0	0	0	0	0.4308	0	0	0.3727	0	0	0	0	0.2632	0	0	0	0	0	0	0	0.8033	0	0	0.6197	0	0	0	0	0.2728	0	0	0	0	0	0	0	0	0
150000	ABCC13	non-coding	0	11.4842	0.4433	0.3711	30.3371	38.0405	0	0	56.8356	1.8282	2.2039	1.113	14.9314	0	0	0.373	1.1182	2.3737	0	0	0.2599	0.7897	0	34.8223	0.3051	0.5853	0	0.8	0.4415	0.8033	0	0	0	2.8606	0	21.4522	3.3536	0	0	0	0.3834	0	0	1.0455	0.3413	0	1.1543
150135	LINC00479	non-coding	0.7825	1.188	0	0.3711	7.8652	2.654	0.6733	0.9537	0.9394	7.3126	1.1019	0.5565	0.4036	1.2925	0	1.4921	1.8636	0	2.6549	0	0	0.7897	2.1855	0	0.6101	0.8779	3.7443	4.8	0.4415	5.6231	2.2422	1.9465	5.5771	1.226	0.7197	0.241	0.4192	15.2744	10.2333	1.9625	0.3834	6.4725	17.276	1.0455	2.7307	0.5743	0
150142	ZNF295-AS1	non-coding	4.3036	0	0	1.1132	35.9551	4.4233	0.6733	1.2716	0	5.4845	3.8567	0.5565	4.0355	4.3083	1.1536	5.9683	0.7454	1.0173	0	0	0.2599	0.7897	0	0	0	3.219	1.6047	0	0	0	0	0	0	0.4087	4.6784	0.4821	0.4192	1.091	0.2007	1.1775	0.3834	0.7192	0	0	1.024	0.8614	12.6972
150147	UMODL1-AS1	non-coding	3.5211	0.792	0	1.4842	15.7303	56.176	1.9761	4.1326	40.3955	53.0165	2.2039	2.2259	3.632	44.3751	1.1536	38.7862	8.5725	1.3564	0	0.5467	3.3793	23.3983	0	0	1.8303	28.678	35.3972	0	0.4415	2.2291	0	0	1.2393	24.1112	34.9078	6.0259	5.0304	0.2728	0	0.785	0.3834	1.0787	3.085	6.2729	1.7067	2.297	9.6191
150185	LINC00895	non-coding	0	0	0	0	4.4944	0.8847	0	0.6358	0	0	0	0	0	0	0	0	0	1.3564	0	0	0	0	0.9366	0	0	0.2926	0	0	0	0	0	0.9732	0	0	0	0	0.4192	0	0	0	0	0	0.617	0	0	0.2871	0
150197	LINC00896	non-coding	0	3.9601	3.5465	2.2263	10.1124	0.8847	0.6733	3.1789	3.7577	7.3126	8.2645	1.6694	8.8781	20.2488	1.1536	5.2222	6.3362	2.7128	0.885	7.1077	1.8196	0.5265	0.6244	5.7086	0.3051	2.6337	8.291	3.6	7.947	24.0988	8.9686	1.9465	6.8164	11.8512	0.7197	1.4462	2.096	9.8192	2.0065	7.4576	0	7.1917	3.085	90.4339	0.6827	4.8812	4.2324
150244	ZDHHC8P1	non-coding	2.7387	53.8569	47.4343	30.0557	17.9775	0.4423	115.469	1.2716	17.8492	16.4534	8.8154	6.1213	35.5125	3.4466	58.8315	13.0555	25.3448	15.5985	41.5929	39.9125	82.4019	48.4338	20.6057	45.0978	39.6573	8.1937	22.1984	13.6	49.8896	8.4346	125.561	21.8978	58.8691	120.964	17.274	78.5779	23.8944	38.7315	62.4028	14.5226	13.0368	188.062	56.1468	25.6142	277.851	23.8317	25.0096
150291	MORC2-AS1	non-coding	54.7731	94.6456	86.4457	129.87	206.742	186.221	162.262	84.5585	199.629	166.362	194.49	228.158	215.496	78.8412	51.9101	188.746	38.0171	77.9925	189.381	67.5232	119.834	371.94	144.24	173.541	157.104	95.9836	215.031	65.6	105.96	401.245	117.489	138.686	139.427	337.147	107.602	145.345	64.9759	281.485	349.937	169.561	86.273	125.135	216.566	40.2509	84.9937	160.792	133.513
150381	PRR34-AS1	non-coding	55.5399	42.7687	38.1204	48.5714	103.213	104.832	41.4072	49.2665	34.2658	85.9232	60.0551	18.3639	10.0888	33.5959	116.509	231.27	27.2083	57.2974	91.1416	62.3291	79.0122	24.9934	80.2342	72.4961	64.3638	99.2026	71.8695	48.396	215.452	57.0218	178.466	75.8929	132.61	23.6861	82.0513	109.604	57.0111	4.0914	42.9315	77.6882	50.6135	52.1287	19.1269	173.952	46.0809	82.1104	42.324
150384	GTSE1-AS1	non-coding	19.9531	23.7604	15.0726	22.6345	25.8427	13.2699	30.6346	3.8147	10.3337	5.4845	16.5289	18.9204	7.6675	3.8774	38.0674	31.7063	10.8088	15.2594	75.2212	14.4888	58.4871	33.6931	13.4249	20.2654	10.3719	35.4086	35.3036	12.8	17.2185	25.3037	11.6592	5.8394	5.5771	26.9718	11.1561	20.2471	10.8992	23.7298	20.6672	7.8501	11.1196	38.4754	4.319	21.955	12.9709	14.0693	34.6287
150527	TISP43	non-coding	0	0	0	0	42.6966	0	0	0	0	0	0	0	0.4036	0	0	0	0	0	0	0	0	0	0	0	0	0.2926	0	0	0	0	0	0	0	0	0	0	0	0	0	0	0	0	0	0	0	0.2871	0.7695
150538	SATB2-AS1	non-coding	0	0.792	0	0	19.1011	0	0	0.6358	0	0	0	0	0	0	2.3071	0.373	0	0.3391	0	0.2734	0.2599	0	0.6244	0	0	0	0	0	0.4415	0.4016	0	0	0.6197	0	0.3599	2.1693	0	0	0.2007	0	0	0	0	0	4.0961	0	0
150568	LINC01102	non-coding	0	0	0	0.3711	3.3708	0	0	0	0	0	0	0	0	0	0	0	0	0	0	0	0	0	0	0	0	0	7.2212	1.6	0	0	0	0	0	0	0	0	0	0	0	0	0	0	0	0	0	0.2871	0
150622	LINC01105	non-coding	0	0	0	2.5974	97.7528	0	0.6733	0	4.6972	1.8282	0	0	6.4568	1.7233	0	1.119	0	2.0346	0	0	0	0.2632	0	1.998	0.3051	0	4.8141	2	1.3245	15.2626	0	0	2.4787	0.4087	1.7994	0.241	0.8384	0.8183	0.2007	1.57	0	32.722	0	1.5682	13.9949	16.6535	1.9238
150776	LOC150776	non-coding	332.16	230.872	358.639	305.009	267.416	149.508	167.312	318.843	464.079	332.724	250.689	264.886	390.234	216.275	290.697	199.19	230.339	307.901	414.159	250.957	203.015	177.152	329.691	180.677	244.045	175.872	1412.94	294.4	703.311	577.97	745.292	521.654	929.512	454.843	169.141	462.067	120.31	480.325	324.254	246.1	328.988	306.005	196.822	269.733	197.294	168.258	213.928
151009	LINC01106	non-coding	21.9092	17.0283	78.0228	32.282	40.4494	51.3104	21.8818	29.5637	67.6391	54.8446	24.2424	10.5732	61.7433	21.1105	6.9214	36.9286	23.8539	34.2489	41.5929	27.064	48.3494	54.7513	33.4062	35.6786	10.677	24.8738	47.0714	20	58.2781	130.535	36.7713	160.584	235.476	24.1112	21.5924	15.1853	7.5456	64.0978	6.8222	34.1478	32.592	13.3046	12.34	24.5687	19.7977	80.3962	19.2382
151174	LOC151174	non-coding	2.3474	3.1681	0.8866	17.8108	16.8539	22.1166	1.6832	2.2252	5.1669	21.9378	6.0606	12.2426	5.6497	21.1105	1.1536	7.0873	4.4726	0.6782	15.0442	3.8272	2.0795	21.8479	1.2488	37.962	10.3719	0.5853	23.5357	14	4.8565	1.2049	2.6906	0.9732	2.4787	41.6837	13.3153	20.006	29.344	9.5465	49.5611	9.0276	8.819	46.7458	87.6138	63.7742	6.8268	4.5941	8.08
151300	LINC00608	non-coding	0	0	0	0	10.1124	0	0	0	0	0	0	0	0	0	0	0	0	0	0	0	0	0	0	0	0	0	0	0	0	0	0	0	0	0	0	0	0	0	0	0	0	0	0	0	0	0	0
151325	MYADML	non-coding	0	0	0	0.3711	15.7303	0	0	0.6358	0	0	0	0	0	0	0	0	0	0	0	0	0	0	0	0	0	0	0	0	0	0	0	0	0	0	0	1.4462	0	7.0917	0	0	0	0	0	0	0	0	0
151477	LINC00471	non-coding	9.7809	1.98	12.4127	0.7421	20.2247	3.981	5.3863	0	7.9852	10.9689	3.3058	2.2259	6.4568	4.7391	4.6142	0.746	2.609	0.6782	1.7699	3.5539	12.2173	14.4775	1.8732	3.1397	10.982	2.6337	22.1984	4.8	3.9735	3.6148	4.4843	6.8127	6.1967	4.0866	3.5987	4.8207	4.6112	9.001	1.0033	5.1025	9.2025	14.3833	2.468	13.0685	4.0961	5.7426	5.3867
151507	MSL3P1	non-coding	336.463	108.902	10.1962	55.6586	387.64	201.703	201.986	4.7683	258.344	78.6106	138.292	180.857	161.017	211.536	201.873	58.5635	366.754	115.632	232.743	8.4746	336.106	501.448	236.341	273.726	434.4	206.892	683.338	290	184.106	373.13	215.695	172.749	212.548	596.649	100.045	84.6038	83.8399	317.216	272.887	333.235	361.963	46.3862	265.926	373.236	358.407	188.644	477.491
151534	LBX2-AS1	non-coding	76.4241	52.2808	92.7142	120.594	158.427	115.807	304.097	44.5045	60.8658	206.581	156.474	175.849	157.437	108.568	80.7491	114.889	155.941	91.8956	72.5664	228.652	29.5841	309.892	152.644	191.277	124.463	45.8	53.2228	45.072	78.2737	98.0018	243.749	158.156	34.7018	141.606	95.6977	80.3664	243.358	114.132	83.6719	129.923	231.913	17.4146	481.876	45.1333	47.4463	175.864	242.032
151658	LINC00635	non-coding	0	0	0	0.3711	2.2472	0	0.6733	0	0	0	0	0	0	0	0	0	0	0.3391	0	0	0.2599	0	0	0	0	0	0	0	0	0	0	0	0	0	0	0.4821	0	0.8183	0	0	0	2.5171	0	0	0	0	0
152024	LINC00691	non-coding	0.3912	0.792	2.6599	0.3711	17.9775	0.8847	1.3466	0	2.8183	0	1.1019	2.7824	2.4213	1.2925	8.0749	1.4921	2.609	0.3391	2.6549	1.6402	4.419	0	0.3122	2.5689	0.6101	2.9263	0.5349	0.8	3.0905	1.6066	1.3453	2.9197	3.718	4.904	0	1.6873	0.8384	4.6369	0.2007	1.1775	0	0	0	0	0	2.297	0.7695
152195	NUDT16P1	non-coding	60.6416	207.112	393.217	97.5881	153.933	117.66	48.4767	75.3397	250.358	212.066	150.413	51.1964	89.1848	225.322	526.023	211.5	222.139	118.684	326.549	131.766	274.5	264.28	140.181	292.279	41.4877	354.378	28.3498	263.2	248.565	356.662	176.682	3.4063	4.9574	827.135	92.1278	21.6933	352.966	257.755	130.223	160.534	412.96	356.706	453.494	351.803	218.799	161.367	194.305
152217	NCBP2-AS2	non-coding	879.89	724.692	437.105	463.822	1710.11	1376.09	599.226	651.673	376.712	341.865	458.402	489.149	464.488	193.441	962.068	524.087	863.213	396.745	1464.6	700.656	1008.32	370.887	1128.32	758.955	298.345	1256.27	528.216	586.8	1656.51	1206.95	594.17	2152.8	770.875	1360.85	390.463	177.644	463.215	436.684	648.508	974.585	490.031	407.767	402.9	884.475	554.678	364.654	1188.53
152225	LOC152225	non-coding	0.7825	2.772	0.4433	7.7922	26.9663	6.1926	0.6733	0.9537	1.4091	29.2505	11.0193	2.7824	0.4036	10.7707	4.6142	8.2063	16.0268	1.3564	0	0.8201	0	2.6323	0.6244	0.5709	3.0506	10.5348	3.7443	6.4	0	3.6148	1.7937	0	1.859	2.0433	1.4395	0.241	5.4496	0.5455	0.2007	3.925	46.0123	0	0.617	0	0.6827	2.8713	6.541
152302	CIDECP	non-coding	94.6792	84.2346	85.5591	119.436	156.023	101.197	108.877	67.3925	85.4225	167.221	84.584	98.4975	121.021	108.999	114.202	58.142	92.0611	72.9061	97.3451	88.2996	98.2584	97.2572	81.7983	83.0598	110.43	92.1384	66.7184	36.8	83.6909	89.1656	65.4709	68.6131	211.848	109.898	105.443	69.3823	99.7694	106.102	95.3098	133.745	149.54	218.267	168.015	289.075	86.2088	107.386	106.964
152641	WWC2-AS2	non-coding	0.7825	3.5641	4.8764	7.4212	10.1124	14.1546	12.1192	4.7683	11.7429	12.7971	1.6529	3.8954	4.4391	6.4624	11.5356	9.3254	2.609	12.2075	3.5398	4.374	2.8594	15.5304	16.8592	3.996	14.9478	2.6337	5.349	1.6	13.6865	9.6395	5.8296	0	13.0132	4.4953	8.637	31.0937	10.48	1.6365	2.8091	9.0276	7.2853	2.5171	4.319	4.7047	2.048	8.6139	3.4629
153684	LOC153684	non-coding	31.6901	10.2962	12.4127	21.1503	56.1798	49.5411	11.4459	3.4968	26.7738	67.6417	34.7107	8.9037	28.6521	22.8338	10.382	26.1111	15.6541	40.6918	41.5929	17.2225	10.9176	55.2777	7.493	9.7046	10.0669	10.8274	5.8839	8.8	8.83	16.4675	8.0717	21.4112	11.7738	22.8852	27.7103	10.1235	18.4448	10.092	14.6476	6.2801	39.1104	4.315	12.34	26.137	24.9178	34.1684	63.8707
153743	PPP1R2P3	non-coding	278.952	134.642	119.694	86.0853	198.876	136.238	80.4578	148.454	72.8059	71.298	88.1543	86.8114	73.8499	65.4856	99.2061	77.5873	137.905	82.4008	164.602	139.694	72.784	47.6441	151.421	80.4909	104.634	199.868	82.9099	113.2	126.711	81.1326	115.247	193.674	91.0922	107.478	99.6851	32.0578	111.088	54.0058	99.9248	151.114	131.902	113.269	103.656	159.958	247.471	86.426	180.839
153910	LOC153910	non-coding	0	0	2.2166	0	12.3596	20.7896	0	0	0.4697	16.4534	2.7548	0	0	0.4308	1.1536	0	0	2.0346	0	2.7337	19.2358	0	0	0.5709	0.3051	0.8779	0	1.6	2.649	0	3.139	0	1.859	0	1.0796	0.4821	0.4192	17.7292	4.4143	0	0	0.7192	0	4.1819	12.2882	0.2871	0
154089	LINC01312	non-coding	0	0	0	0	29.2135	0	0	0	0	0	0	0	0	0	0	0	0	0.3391	0.885	0	19.2358	0.2632	0	0	0	0	0	0	0.4415	3.2132	0	0	1.2393	0	0	0	0	0	0	0	0	0	0	0	0	0	13.8515
154386	LINC01600	non-coding	0	0.792	3.5465	0	5.618	0	1.3466	0	3.288	3.6563	0	0.5565	0.4036	0	1.1536	0.373	3.3545	0	0	2.4604	1.8196	0	0	0.5709	1.8303	0.8779	5.349	0	1.3245	6.4263	0.4484	0	2.4787	0.8173	0.7197	2.1693	0.4192	1.6365	1.8059	0.3925	2.3006	5.0342	3.085	7.8411	5.4614	0.5743	0.7695
154449	LOC154449	non-coding	0.7825	0	0	0	10.1124	0	0	0	0.4697	0	0	0	0.4036	0	0	0	0	0	0	0	0	0	0	0	0	0	0.5349	0	0	0	0	0	0	0	0	0	0	0.5455	0.2007	0	0	0	0	0	0	0	0
154754	PRSS3P2	non-coding	1.9562	1.584	46.1044	28.9425	11.236	3.0963	1.6832	15.8945	0	5.4845	0.551	22.8158	0	22.8338	4.6142	25.3651	0	15.2594	1.7699	0	0.5199	3.422	3.7465	16.8403	85.4158	0	2.4071	2.4	381.457	36.9515	0	9.2457	0	0.4087	64.0576	0.7231	19.7024	3.2731	0	0.785	0	0	152.399	6.2729	5.1201	13.208	14.621
154761	LOC154761	non-coding	42.3905	39.1057	28.8906	76.167	239.977	68.5834	68.6854	64.1628	31.9125	39.0311	85.3058	54.3628	42.1106	59.2774	89.3201	41.6024	12.2214	41.1936	50.0354	47.4877	56.6337	43.3983	34.118	26.7218	28.8278	18.8543	113.049	46.652	32.5563	39.514	123.43	25.5961	63.213	56.7552	20.8511	90.1549	67.6504	34.1137	9.3644	30.4936	22.4156	2.8767	27.839	81.2964	14.408	72.236	63.7207
154822	LINC00689	non-coding	1.1228	0.1465	0	2.2263	39.6292	7.4046	0.5285	1.2716	6.6324	26.0695	2.2039	0.7067	11.477	13.6184	0	49.3985	3.6675	18.0298	4.1416	0.8584	4.77	28.6891	0	4.604	5.9059	4.8431	0.2675	0.464	2.702	18.6926	0.4484	0.6423	0	22.6522	4.0486	0.4821	0.4192	20.304	6.0336	0	2.1434	2.4847	3.702	2.091	2.3894	26.4705	2.7511
155060	LOC155060	non-coding	60.6416	51.4809	119.251	149.907	146.067	51.7527	75.7448	100.771	111.792	208.41	129.477	85.1419	269.169	137.864	55.3708	55.9524	76.407	115.632	99.115	136.14	165.584	133.193	57.1339	65.6486	69.8579	40.0907	364.803	132.8	211.921	221.709	256.951	441.849	425.097	295.055	80.6118	189.696	64.9759	333.036	124.605	60.4455	58.6656	433.297	144.378	38.16	161.454	81.5448	60.4078
155370	SBDSP1	non-coding	478.482	314.429	381.248	444.527	373.034	376.424	451.103	509.259	520.445	422.303	463.361	537.006	401.534	593.679	574.472	271.928	595.602	434.045	385.841	362.767	468.677	328.507	762.722	292.565	227.877	373.4	293.394	319.6	592.936	548.248	365.471	545.499	1006.35	222.313	400.18	312.383	428.422	346.674	233.76	670.395	344.709	901.834	359.093	503.921	368.647	291.149	449.404
155400	NSUN5P1	non-coding	95.0704	142.166	132.994	125.046	91.0112	72.5423	62.6157	93.7773	90.6551	179.159	131.68	258.208	151.735	112.015	111.895	39.1666	86.4704	43.0654	115.929	55.2214	56.6675	56.5938	97.4087	76.2095	53.6899	49.455	163.145	152.8	226.49	384.376	287.892	284.671	582.494	178.177	56.5002	64.3567	207.084	84.2818	52.1696	70.2581	66.7178	245.595	499.152	574.49	191.492	70.921	85.8022
157381	LINC00964	non-coding	24.2567	0.792	5.3197	0.3711	24.7191	13.2699	7.4062	9.2188	61.5328	5.4845	8.8154	3.3389	18.9669	28.4345	6.9214	4.4762	1.8636	16.2767	7.9646	2.187	0.7798	1.3161	0	0	2.1354	5.8527	16.8494	6.8	2.649	3.6148	11.2108	0	23.5476	14.3032	6.1179	1.6873	2.9344	2.4548	2.8091	18.8402	0.7669	0.3596	0.617	0	0	0.5743	10.0038
157556	BAALC-AS2	non-coding	0	2.0078	0.6517	0	3.6742	3.2157	2.8884	0.9123	0.6059	0	0	0	0	0.1034	1.1536	2.8237	0.9542	0	0	1.6348	1.7624	8.0337	0.3497	0.6337	0.4332	7.2632	0.7007	1.2	2.2075	0	2.1704	0.0341	0.6197	0.8051	1.4179	0.4315	4.171	0	0	4.6669	0	1.4383	0	3.0737	0.1297	2.1133	1.2659
157627	LINC00599	non-coding	0	0	0	0.3711	14.6067	0	0	0	0	0	0	0	0	0	0	0	0	0	0	0	0	0	0	0	0	0	0	0.8	0.4415	0	0	0.4866	0	0	0	0	0	1.091	0	0	0	0	0	0	2.7307	0.5743	0
157739	TDH	non-coding	32.4726	11.0882	21.7223	22.2635	4.4944	3.981	3.0298	26.0669	5.1669	1.8282	1.1019	42.8492	1.2107	0	8.0749	2.2381	0.7454	1.6955	12.3894	3.2805	10.1378	0.7897	2.1855	0	0.3051	17.2653	0	6.4	3.532	10.8445	1.7937	68.6131	4.3377	4.904	5.758	22.4164	0	12.0013	2.8091	0.3925	0.7669	4.6746	0	0	0.3413	5.7426	21.9315
158035	LINC00032	non-coding	0	0	0	0	5.618	0	0	0	0.4697	0	0	1.113	0	0	0	0	0	0	0	0	0.7798	0.2632	0	0.2854	0	0	0	0	0	0	0.4484	0	0	0	0	0	0.4192	0.5455	0	0	1.1503	0	0	0	0	0.2871	0.3848
158160	HSD17B7P2	non-coding	35.6025	28.5125	51.8674	41.1874	40.4494	18.5779	27.2681	152.905	20.1978	89.5795	44.0771	12.7991	56.9007	41.7902	104.974	23.873	48.4532	36.6226	49.5575	34.9918	60.5667	41.8531	26.2254	7.4212	39.0472	32.1896	41.7224	40.4	68.4327	43.7795	33.6323	31.6302	23.5476	61.7082	45.704	56.4025	72.1023	46.0959	49.5611	24.3352	86.273	101.043	115.996	154.208	128.685	24.1189	40.7849
158228	FAM201A	non-coding	23.4742	40.3927	67.8267	21.5213	6.7416	18.1356	14.4757	58.1737	21.1372	31.0786	12.6722	26.7112	38.3374	37.4819	26.5319	55.2063	33.1718	151.577	106.195	137.233	160.905	22.6375	22.1667	59.3692	6.1011	25.4591	169.029	58	2038.85	43.3778	27.8027	27.2506	30.9837	45.7703	29.1498	16.1494	27.6672	92.1918	12.4404	13.7376	67.8681	159.295	0	119.184	60.0758	27.2773	66.1793
158314	LINC00475	non-coding	0.3912	1.98	1.3299	1.1132	6.7416	2.2117	0	0.3179	1.4091	0	1.1019	8.9037	1.2107	3.8774	0	1.119	0.7454	0.6782	0.885	2.187	1.0398	1.5794	1.561	0.5709	0.3051	0	0.2675	0	5.298	0.4016	0	0	11.1541	2.0433	0.3599	0	0.8384	5.1824	0.2007	0	0.7669	0	0	1.0455	1.024	2.297	0.3848
158376	LINC00961	non-coding	4.3036	9.1082	15.0726	15.9555	15.7303	17.2509	6.0596	7.6293	46.9716	21.9378	11.0193	7.7908	22.1953	20.2488	19.6105	24.619	12.6724	14.9203	7.0796	30.6178	5.1989	10.0026	10.615	10.5609	7.6264	5.8527	5.8839	4.4	7.064	6.4263	4.9327	0	7.4361	10.2166	16.9141	7.7132	12.576	7.3644	7.6248	7.0651	62.5	14.0237	12.34	14.114	5.8028	14.3565	10.7734
158381	ATP8B5P	non-coding	21.9092	23.3644	29.7019	21.5213	38.2022	36.2711	20.5353	28.9279	33.3498	32.9068	23.1405	26.7112	25.8273	17.2331	11.5356	26.8571	37.6444	30.1797	15.0442	31.9847	14.8167	13.4246	24.9766	43.3852	52.1646	19.6064	24.6055	32	46.3576	32.1317	20.1794	17.0316	43.3772	24.9285	15.8345	28.2013	23.4752	21.0023	34.9135	49.0629	44.862	55.0162	43.8069	71.0925	23.2111	25.8416	36.5525
158572	USP27X-AS1	non-coding	12.5196	36.0366	29.2586	14.8423	40.4494	17.6932	47.1301	13.9871	19.2583	18.2815	26.9972	11.1297	31.0734	24.1263	27.6854	27.9762	23.4812	21.0241	29.2035	39.3658	34.5724	48.4338	22.7911	33.1097	13.7275	22.8254	36.1059	34.8	44.1501	18.4758	62.3318	10.7056	28.505	19.2072	22.6721	27.4782	26.8288	37.9132	22.8743	15.7001	8.819	148.148	50.5939	38.16	27.6485	36.1783	16.1601
158696	LINC00889	non-coding	0.3912	2.376	0.8866	3.3395	11.236	1.327	1.0099	1.2716	2.3486	1.8282	0	0.5565	1.2107	1.7233	1.1536	1.4921	1.1182	1.6955	1.7699	0.5467	13.2571	0.7897	3.1221	0.8563	0.6101	0.2926	0.8024	0	2.2075	0	7.1749	1.9465	11.1541	7.3559	2.1592	12.5339	0	16.0927	37.3213	0	3.0675	0.3596	3.085	5.2274	7.5095	2.5842	0
158801	NKAPP1	non-coding	120.501	11.0882	15.9592	17.0686	19.1011	24.3282	23.9017	14.6229	28.1829	34.7349	18.7328	20.0334	20.1776	14.2173	8.0749	16.0397	13.4178	12.5466	20.354	24.6036	79.0226	2.8955	23.4155	11.1317	23.1843	27.2149	25.6753	22	26.9316	18.4758	26.4574	19.9513	28.505	19.2072	23.7517	19.765	28.9248	21.0023	11.6378	25.5127	26.0736	51.0608	25.9139	94.093	15.019	27.5644	20.3925
159125	RBMY2EP	non-coding	0	0	0	0	0	0	0	0	0	0	0	0	0	0	0	0	0	0	0	0	0	0	0	0	4.8809	0	0	0	0	0	0	0	0	0	0	0	0	0	0	0	0	0	0	0	0	0	0
159162	RBMY2FP	non-coding	0	0	0	0	5.618	0	0	0	0	0	0	0	0	0	0	0	0	0	0	0	0	0	0	0	0	0	0	0	0	0	0	0	0	0	0	0	0	0	0	0	0	0	0	0	0	0	0
161635	CSNK1A1P1	non-coding	0	0.396	0	6.308	11.236	0	0.3366	0	0.4697	1.8282	2.7548	0.5565	1.2107	0	0	0	0	0	0	0	0.5199	0	0.3122	0.2854	0.6101	0	0.2675	0.8	0.4415	0	0	1.4599	2.4787	0	0	0.241	0.4192	1.9093	0	0.785	0	0.7192	19.7439	0	0	0.2871	0
162632	USP32P1	non-coding	8.6072	38.1117	25.7121	120.575	26.9663	12.8276	9.7627	63.5778	312.976	662.322	361.174	11.6861	106.816	180.335	144.403	196.579	133.526	172.041	114.133	294.166	13.2571	254.604	46.4065	16.8403	98.6278	20.5692	15.0896	14.8	582.119	12.451	69.9103	67.1533	66.3052	287.626	27.0121	339.505	247.608	6.0006	23.677	43.7484	111.741	664.509	401.703	1003.67	800.391	38.6218	387.945
163720	CYP4Z2P	non-coding	0	0.396	0.8866	1.1132	14.6067	7.0773	0	0.3179	10.8035	0	0.551	0	2.4213	0.4308	0	0.373	0.3727	0.6782	0	0	0.2599	3.422	0	0	8.8466	0.8779	4.0118	2.8	0	0	0	0	0.6197	1.6347	1.7994	1.2052	0	1.6365	1.4046	0	6.5184	0.3596	0	0	0	10.9109	0.3848
163742	SLC25A3P1	non-coding	0	0	0	0	1.1236	0	0	0	0	0	0	0	0	0	0	0	0	0	0	0	0	0	0	0	0	0	0	0	0	0	0	0	0	0	0	0	0	0	0	0	0	0	0	0	0	0	0
164380	CST13P	non-coding	0	0	0	0	5.618	0	0	0	0	0	0	0	0	0	0	0	0	0	0	0	0	0	0	0	0	0	0.2675	0	0	0	0	0	0	0	0	0	0.4192	0	0	0	0	0	0	1.0455	0	0	0
168448	CDC14C	non-coding	10.9546	9.5042	6.2064	3.3395	16.8539	1.327	5.7229	8.9009	6.1063	1.8282	10.4683	7.2343	5.2462	5.6007	16.1498	5.9683	4.8453	10.512	4.4248	10.6616	22.3551	3.6852	5.3075	9.1337	5.491	8.4864	4.0118	10	10.596	6.4263	1.7937	7.7859	1.859	0.8173	9.3567	7.4721	6.288	9.2737	4.615	3.925	6.9018	5.7533	3.085	2.6137	10.2402	4.3069	7.6953
168474	SEPHS1P1	non-coding	4.3036	0	1.7732	1.1132	25.8427	0.8847	1.6832	4.7683	0.4697	3.6563	9.3664	0.5565	2.4213	1.2925	0	2.9841	0	0.6782	0.885	2.187	4.1591	3.422	2.8099	1.4271	0.9152	3.219	6.9537	2	3.9735	1.2049	1.3453	4.3796	11.7738	11.4426	2.5191	0.9641	0	7.6372	2.8091	0.785	1.1503	6.1129	1.234	0.5227	5.1201	1.1485	0.7695
168741	PER4	non-coding	0	0	0	0	6.7416	0	0	0	0	0	0	0	0	0	0	0	0	0.3391	0	0	0	0	0	0	0	0	0	0	0	0	0	0	0	0	0	0	0	3.8186	0	0	0	0	0	0	0	0.2871	0
170958	ZNF525	non-coding	143.584	223.348	190.624	165.121	324.719	126.949	431.914	147.183	267.738	170.018	453.995	50.64	460.706	218.429	335.686	80.1984	291.465	277.721	260.177	149.535	459.579	177.152	291.289	221.207	282.177	201.332	719.176	250.8	332.892	123.707	324.215	51.0949	178.466	430.323	224.921	187.493	250.262	12.5468	407.926	186.832	47.9294	111.83	209.779	100.366	235.183	199.555	336.283
171022	ABHD11-AS1	non-coding	15.6495	1.584	3.9898	1.8553	2.2472	38.9251	3.0298	8.2651	6.1063	31.0786	1.1019	6.6778	10.4923	44.3751	3.4607	36.9286	10.8088	16.2767	2.6549	12.3018	1.0398	9.7394	24.9766	4.8523	0.6101	14.9243	1.6047	20	4.8565	8.4346	14.7982	0.9732	45.8559	11.0339	15.8345	3.6155	44.4351	2.7276	4.8157	18.4476	4.6012	0	7.404	183.481	0	14.0693	5.3867
171423	PDIA3P1	non-coding	1715.96	2317.43	4354.21	3159.93	5968.54	4448.52	3062.11	2954.46	3724.85	4634.37	6611.02	2585.42	3394.67	2232.11	2101.78	3771.93	2551.99	3004.07	2160.18	4149.26	2133.61	4325.61	2952.23	4080.78	3803.75	3036.07	3303.02	3938.4	3683.89	6770.96	2234.08	2212.65	2261.19	2290.15	3418.8	4310.45	4614.97	2892.59	3860.15	2921.01	5173.7	1584.68	2993.68	2112.39	1984.89	5415.84	2112.74
193629	LINC00189	non-coding	1.5649	2.772	0.4433	0.7421	6.7416	0.4423	3.0298	0	1.8789	14.6252	1.6529	1.6694	3.632	2.585	1.1536	1.4921	0.3727	0.3391	0	3.0071	1.0398	0	0.3122	0.5709	7.9315	0.5853	0	0	0	0.4016	0.8969	0	1.2393	0	2.1592	1.6873	2.9344	4.9096	5.6183	0.785	62.5	1.4383	36.4029	0.5227	1.7067	2.297	0.7695
196047	EMX2OS	non-coding	0.3912	1.188	0	0	46.0674	0	32.9911	0.6358	2.3486	0	0.551	0	121.469	2.585	9.2285	5.2222	0.7454	0.3391	0	1.0935	0.5199	2.1058	0.3122	0	1.8303	3.219	74.6189	1.2	0	0	2.2422	0.4866	0.6197	0.8173	1.4395	1.2052	1.2576	47.1869	0.4013	12.1676	2.684	0	0	0	338.268	4.0198	13.4667
196475	RMST	non-coding	0	0	0.4433	0.3711	4.4944	0	0	0	1.4091	0	0.551	0	0	0.4308	0	0.746	0	0.6782	0	0	0	0.2632	0	0.2854	0	0	0.8024	0.4	0.4415	0.4016	0	0	0	0.8173	0	0	0	1.091	0	0	0	30.5645	1.234	0	20.8217	0	0.3848
196549	EEF1DP3	non-coding	1.5649	1.188	0.4433	0.7644	2.2921	1.327	0.3366	0.3179	2.3486	4.7898	2.1157	0	0.8071	3.7783	1.1536	0.6752	0	3.391	1.7699	0.8201	13.9641	0.7897	0.6244	1.7126	0.1891	0.5853	3.1051	3.948	0.649	1.4299	0	2.0827	1.3757	0.0695	0.7197	1.2052	0.8384	0	0.7685	2.8613	2.1933	0.1942	1.234	1.0455	0	0.8614	1.9238
196872	LINC00638	non-coding	80.9859	35.2446	32.8051	37.1058	70.7865	26.5399	84.8342	6.6757	46.9716	34.7349	19.8347	20.0334	29.8628	44.3751	26.5319	11.9365	38.7626	33.5707	34.5133	24.0569	49.3891	72.6507	45.8945	62.7943	10.3719	15.8022	66.5953	10.8	2.2075	4.4181	55.6054	13.6253	24.787	50.6743	14.0351	19.0419	18.864	31.0943	25.6835	18.0551	6.135	17.26	8.021	9.4093	58.7105	44.7922	56.5602
196913	LINC01599	non-coding	0	0	0	0	0	0	0.3366	0	0	0	0	0	0.4036	0	0	0	0	0	0	0	0	0	0	0	0	0	0	0.4	0	0	0	0	0.6197	0	0	0	0	0.2728	0	0	0	0	0	0	0	0.2871	0
196968	DNM1P46	non-coding	3.5211	0.792	2.6599	5.5659	20.2247	0.8847	14.4757	0	2.8183	9.1408	1.6529	1.6694	5.2462	8.6165	4.6142	4.4762	0.7454	2.7128	0.885	2.7337	0.7798	5.2645	5.6197	3.996	3.9657	4.9748	6.1514	0.8	1.766	0.4016	1.3453	0	0.6197	2.8606	2.5191	0.4821	2.9344	0.8183	0.602	0.785	2.3006	2.1575	1.851	0	7.8508	0.5743	6.1562
197003	MGC15885	non-coding	0	0.792	0	0.3711	12.3596	0	0	0.6358	0	0	0	0	0	0	0	0.373	0	0	0.885	0.8201	1.0398	0	0.3122	1.7126	0	0	0.5349	1.6	1.766	0	0	0	0	0	0.7197	0.7231	0	0	0	0.3925	0	0	0	0	0.3413	0	0
197187	SNAI3-AS1	non-coding	43.8185	15.4443	23.0522	27.8293	52.809	18.5779	85.1708	21.9344	28.1829	43.8757	38.5675	17.251	49.6368	34.8969	33.4532	19.0238	11.1815	59.0031	13.2743	24.0569	59.267	40.537	12.8005	46.8103	16.473	16.3874	25.9428	20.4	74.6137	33.7383	37.6682	32.1168	25.4067	7.3559	43.5448	26.514	38.1471	21.8205	9.23	12.9526	30.2914	139.159	43.1899	40.7737	27.3072	26.703	28.0877
200058	FLJ23867	non-coding	482.003	643.907	1534.3	912.059	1352.81	1998.45	754.755	1311.93	1585.76	1318.1	1061.71	1530.88	2626.72	2831.39	497.184	2124.32	1900.11	1632.08	705.31	3527.34	2532.1	1830.74	1189.51	2028.83	711.086	936.718	1435.95	3409.2	2890.95	6671.35	2208.52	1326.03	2020.14	1906.82	1397.75	555.83	1044.64	1071.93	3041.08	1229.71	552.914	1080.55	55.5298	566.126	520.202	1133.01	794.152
200197	TMEM51-AS1	non-coding	8.8263	16.161	33.4479	105.109	88.2022	52.1376	39.1719	6.9204	22.2645	103.784	64.7824	21.1797	117.393	95.5401	14.8232	41.1809	59.8584	89.5761	30.6549	66.1919	11.7234	26.1569	14.0244	47.2613	48.3514	26.056	129.551	49.296	4.0044	46.093	22.2691	54.0973	37.8497	85.1001	33.8498	6.5466	39.673	32.2726	8.9451	30.9332	30.8282	37.109	12.3338	62.8071	383.523	67.3175	30.4386
200420	ALMS1P1	non-coding	0	0.396	12.4127	3.7106	3.3708	1.327	2.3565	0.3179	1.8789	3.6563	4.4077	0	5.2462	1.7233	0	2.6111	0	1.0173	5.3097	5.7408	2.8594	2.8955	0.6244	0.5709	5.491	0.8779	3.7443	3.6	3.532	1.2049	0.8969	0.4866	4.3377	7.3559	0.3599	1.9283	11.7376	10.9103	7.8254	3.14	7.6687	2.1575	0	1.5682	1.3654	3.7327	3.8476
201283	AMZ2P1	non-coding	219.875	190.479	362.629	144.341	132.584	106.159	216.125	129.381	135.748	157.221	117.355	190.874	161.824	77.9796	276.854	107.428	321.655	130.553	355.752	154.456	198.856	212.424	106.463	248.038	114.091	186.993	178.123	150.8	250.331	114.068	159.641	223.358	87.9938	89.4973	132.434	206.809	189.897	199.658	202.859	97.3408	175.997	435.815	359.71	693.675	535.562	267.892	137.745
201651	AADACP1	non-coding	244.131	22.1764	23.9388	23.3766	38.2022	16.3663	1.6832	4.1326	58.7145	14.6252	19.2837	6.1213	1.2107	8.1857	73.8278	26.1111	125.606	4.4083	166.372	17.4959	119.574	9.213	55.8851	13.1297	6.7112	100.373	0.2675	67.6	41.9426	22.0906	110.762	36.4964	30.3641	146.71	29.5097	68.2133	237.267	11.4558	6.4209	9.0276	587.807	0.7192	83.2948	7.3183	2.048	10.3367	98.8842
202020	TAPT1-AS1	non-coding	37.9499	37.6206	50.0942	77.18	44.9438	53.9644	64.9722	34.6499	175.204	117.002	132.782	38.3973	71.025	83.5803	54.2173	48.119	32.0537	38.3181	73.4513	27.3373	114.635	86.865	49.641	28.8283	23.7944	37.1644	148.703	36.8	124.062	36.5499	58.7444	41.8491	101.627	145.484	72.3347	76.6496	32.2783	39.5497	56.3832	26.6902	44.0951	190.939	201.758	83.6383	113.666	55.416	58.0993
202181	LOC202181	non-coding	10.5634	15.8403	46.5477	33.7662	37.0787	13.2699	16.8322	11.7619	24.4252	43.8757	37.4656	9.4602	60.5327	28.0037	17.3034	21.6349	8.1998	32.2143	14.1593	32.5314	31.713	15.5304	22.1667	17.4112	43.318	16.0948	90.1311	43.6	37.5276	17.2708	67.2646	34.0633	136.948	53.9436	19.4332	32.5399	12.576	39.277	22.8743	37.2878	5.7515	45.667	6.787	13.5912	38.2301	33.307	19.6229
202299	LINC01554	non-coding	0.7825	0.396	3.5465	4.8237	13.4831	1.7693	1.0099	0	5.6366	7.3126	4.9587	1.6694	6.4568	3.0158	1.1536	3.7302	0.7454	1.3564	0	3.5539	0	2.6323	0.9366	0	1.2202	1.7558	0.8024	2	1.3245	42.1729	0.4484	0	1.859	3.2693	1.4395	1.2052	0.4192	0.8183	0.8026	2.355	3.8344	2.8767	0.617	0.5227	1.7067	197.545	1.9238
202459	OSTCP1	non-coding	12.1283	7.9201	4.8764	6.308	13.4831	12.3853	4.0397	6.6757	6.576	12.7971	22.0386	10.5732	5.2462	9.0474	2.3071	2.6111	7.4543	6.1038	1.7699	4.374	6.7585	3.6852	3.4343	2.5689	4.5758	4.9748	6.1514	3.6	2.649	5.2214	8.5202	5.8394	6.8164	5.3126	5.758	8.9183	10.8992	4.9096	5.217	11.7751	10.7362	5.3937	42.5729	19.8641	10.2402	4.5941	9.6191
202781	PAXIP1-AS1	non-coding	278.56	260.968	246.038	345.084	232.584	138.007	112.102	207.582	94.4128	210.238	174.656	217.028	123.89	124.94	609.079	220.452	351.845	119.362	423.009	189.448	584.611	481.969	115.517	214.072	75.0439	351.745	418.561	240	663.135	303.645	342.152	375.669	385.438	838.169	156.545	210.907	64.1375	233.753	227.54	81.6407	116.564	446.962	135.123	152.117	355.676	158.783	242.401
204010	RPSAP52	non-coding	2.7387	5.5441	0	2.9685	11.236	2.654	4.713	6.3578	3.288	0	1.1019	1.113	2.8249	2.585	0	2.2381	0.7454	8.8165	0	2.187	1.8196	7.6336	12.4883	0	5.7961	1.7558	0.5349	2	2.2075	3.2132	19.2825	0	6.8164	6.5386	6.8376	6.508	14.2528	15.8199	7.2235	82.8182	1.1503	0	1.234	4.1819	3.4134	3.1584	6.541
205251	LINC00116	non-coding	481.221	290.273	500.055	170.686	57.3034	335.729	319.138	206.946	129.172	288.848	120.661	219.811	117.03	179.224	241.094	233.135	189.713	275.009	245.133	231	205.095	209.529	472.057	266.876	163.205	635.891	87.4565	241.6	362.472	293.202	10.3139	428.224	946.863	298.733	240.756	129.196	353.385	79.9177	181.189	304.582	218.558	576.771	802.098	987.977	203.097	157.347	288.957
206426	PIP5K1P1	non-coding	0.7825	0.792	1.3299	2.9685	28.0899	0.4423	0	0.9537	2.3486	5.4845	6.0606	2.2259	1.6142	1.2925	1.1536	1.4921	1.1182	0.3391	1.7699	0.8201	1.2997	0.2632	0.9366	0.8563	0.9152	1.1705	2.4071	2.4	1.766	2.4099	1.7937	3.4063	3.718	0.8173	0.7197	2.4104	1.2576	2.4548	0.602	1.9625	0.7669	2.1575	3.085	3.1364	1.024	1.4356	0
207107	SFTA1P	non-coding	8.6072	7.1281	20.8356	83.4879	25.8427	198.607	4.0397	30.8353	387.515	140.768	9.9174	16.138	211.057	147.774	1.1536	66.7698	27.9538	191.59	7.0796	2.4604	39.2514	23.9537	1.561	67.0758	36.9118	0.8779	3.7443	6.8	42.3841	17.6725	1.7937	1.9465	2.4787	27.7891	74.8538	5.7849	71.2639	8.4555	15.8515	7.8501	60.9663	18.3387	19.1269	17.7731	17.067	24.406	115.429
219347	TMEM254-AS1	non-coding	72.1127	53.1005	27.042	211.503	33.7079	50.5186	92.2875	186.2	64.0316	29.2505	20.9366	72.3428	81.1864	241.263	55.3708	35.1754	33.5445	28.2638	174.876	34.5954	95.5264	46.6991	72.2011	9.4192	14.4566	117.747	90.5991	61.672	77.6247	10.9208	56.7578	17.1095	105.19	118.177	147.538	24.8605	117.887	43.712	17.4708	32.9703	26.9172	176.555	125.868	21.955	35.158	39.1415	30.0539
219445	OR7E5P	non-coding	0	1.584	0	0.3711	8.9888	6.635	0	0	15.0309	0	0.551	5.0083	1.2107	0	0	0	0	0.3391	15.9292	0	21.0554	0.2632	0	0	3.0506	0	0	0	0	0	0	0	11.7738	52.7176	4.3185	0.241	0	3.0003	5.4176	0	0	0	12.34	0	0	0.8614	26.9334
220115	TPTE2P3	non-coding	3.1299	0	0.4433	0	0	0	0	0	0	0	0	0.5565	0	0	0	0.373	0	0	0	0	0	1.0529	0.6244	0	0	0	0	0	0	0	0	0	0.6197	0.4087	0	0.7231	0	0.2728	0	1.1775	0.7669	8.63	3.085	0	0	1.4356	0
220429	CTAGE10P	non-coding	16.4319	6.3361	2.2166	1.1132	22.4719	1.327	0.6733	1.2716	0.9394	3.6563	3.8567	2.2259	2.4213	1.2925	2.3071	3.3571	3.3545	2.3737	2.6549	2.187	2.3395	0.7897	1.561	3.1397	0.6101	3.219	1.0698	1.2	2.2075	7.2296	4.0359	1.9465	2.4787	0.8173	2.1592	1.9283	3.3536	0.8183	0.4013	0	1.1503	4.315	2.468	2.091	2.7307	2.297	1.1543
220594	USP32P2	non-coding	17.1283	5.9401	45.7719	202.23	73.6629	50.0763	4.713	16.5302	42.7723	14.6252	6.0606	47.3011	63.9023	103.286	104.974	6.3413	15.6541	7.4602	14.1593	7.6545	27.294	28.1653	118.857	83.174	17.0832	2.6337	21.6635	28	27.8146	16.1542	261.641	273.718	253.447	8.1733	77.013	14.7153	11.3184	23.7353	88.3973	25.9052	36.8098	328.54	258.084	19.3413	22.1871	90.9511	49.6345
220729	LOC220729	non-coding	409.233	308.489	349.773	335.436	413.483	160.124	105.37	253.04	177.083	159.049	141.598	269.338	225.182	124.94	337.993	130.555	168.841	214.988	276.991	422.362	159.085	98.447	319.076	238.904	98.5332	323.945	227.333	408.8	537.748	286.374	336.771	631.144	742.37	527.994	181.376	65.5619	189.897	139.924	107.549	465.116	146.089	165.408	254.82	322.007	246.106	108.535	317.815
220832	FABP5P3	non-coding	1.1737	0.792	0.4433	3.3395	7.8652	23.8859	3.0298	0.9537	0.9394	0	2.7548	1.113	2.0178	0.4308	2.3071	2.2381	1.8636	5.4256	0	0.5467	0.7798	0.5265	6.2441	1.1417	0.3051	4.3895	5.0816	4.4	0.4415	0	25.5605	5.8394	23.5476	4.904	0.7197	0.241	0.8384	1.9093	2.0065	4.3175	1.5337	3.5958	1.234	0	1.024	0.2871	4.2324
220930	ZEB1-AS1	non-coding	214.769	194.835	253.082	35.2505	90.7865	37.1558	57.4651	71.4043	77.2682	91.4077	62.259	45.6316	28.2486	71.0864	245.708	76.6137	84.9795	37.7213	77.8319	94.2892	266.218	35.0092	119.344	148.041	115.299	81.5392	161.752	94.52	93.4305	219.857	166.673	288.491	93.3416	128.263	92.682	51.0612	29.7632	69.4521	52.7053	31.0078	97.3773	315.61	48.7429	61.6832	191.464	91.3072	110.042
221122	LOC221122	non-coding	0.3912	0.396	0	0	3.3708	0	0	0	0.4697	0	0	0	0	0	0	0.373	0	0	0	0.5467	0	0	0	0	0.3051	0	1.3373	0.8	0	0	0	0	0	0	0	0	0	1.3638	0	0	0	0	0.617	0	0	0	0
221241	LINC00305	non-coding	0	0	0	0	3.3708	0	0	0	0	0	2.7548	1.113	1.2107	0	0	0.373	0.7454	0	0	0.2734	0	0	0	0	0	0.2926	0.2675	0	0	0	0	0.4866	0	0	0.3599	0	0	0	0	0	0	0	0	1.5682	0	0	0
221438	TREML5P	non-coding	0	0	0	0	0	0	0	0	0	0	0	0	0	0	0	0	0	0	0	0	0	0	0	0	0	0	0	0	0	0	0	0	0	0	0	0	0	0	0	0	0	0	0	0	0	0	0
221442	ADCY10P1	non-coding	9.7809	15.4443	27.4853	70.1299	31.4607	5.7503	10.7726	76.6113	24.8949	32.9068	17.0799	34.5019	36.3196	15.0789	39.221	36.5555	5.5908	22.3839	38.0531	20.7764	53.0283	18.6891	60.5682	9.7046	9.1517	10.5348	58.3044	47.2	285.21	89.993	21.5247	97.8102	40.8985	174.916	7.1975	69.6595	2.9344	67.6437	54.3767	33.3628	34.1258	21.9346	47.5089	43.3873	79.1909	21.5347	24.6249
221584	ZSCAN12P1	non-coding	11.5336	16.0898	12.856	47.3135	53.9551	8.736	18.3774	5.8492	88.2549	29.2505	57.3388	4.68	56.2268	22.2996	5.7678	24.9921	26.9549	30.5866	11.5044	14.9781	13.2727	37.4019	13.9806	9.8016	16.3876	2.7742	90.4975	12.216	6.4989	98.0942	3.2825	7.6107	6.4384	20.045	20.1493	22.6791	28.7361	30.1342	23.2596	17.2584	18.7883	12.8946	10.3471	7.9404	35.4106	29.5054	14.3401
221718	LINC00518	non-coding	0	0.792	0	2.2263	19.1011	3.0963	3.0298	4.1326	1.4091	9.1408	1.6529	0.5565	4.4391	0	0	0.373	73.0526	0	0	1.3669	0.5199	0.7897	0	0	1.2202	0.2926	0	0	0	1.6066	0.8969	0	0.6197	1.226	1.4395	22.8985	0.4192	33.0036	20.0652	0.785	0.7669	2.1575	1.851	1.0455	0.3413	0.2871	0.7695
221883	HOXA11-AS	non-coding	1.5649	4.3561	0.8866	2.5974	22.4719	2.2117	12.4558	1.2716	17.8492	1.8282	8.8154	4.4519	8.8781	0.4308	18.4569	2.2381	2.609	7.1211	28.3186	4.6473	22.3551	65.5436	2.8099	8.5629	2.1354	3.219	0	4.8	10.1545	6.828	5.8296	1.4599	14.2525	17.5725	2.879	258.15	1.6768	10.092	34.7128	1.9625	19.1718	0	1.234	0	2.3894	8.3268	25.7791
222029	DKFZp434L192	non-coding	0	0	0	0	3.3708	0	0	0	0	0	0	0	0	0.4308	0	0	0	0	0	0	0	0	0	0	0	0	0.2675	0	0	0	0	0	0	0	0	0	0	0	0	0	0	0.3596	0	0	0.6827	0	0
222161	DKFZP586I1420	non-coding	114.632	131.474	206.14	211.874	266.292	171.625	121.192	226.337	216.069	204.753	227.548	96.2716	186.844	205.935	91.1312	168.603	118.897	189.217	114.159	110.443	317.65	201.106	155.479	98.473	120.497	61.4529	314.523	191.6	184.106	198.815	259.193	174.696	130.751	293.012	172.38	128.954	59.1071	266.211	513.469	110.293	133.436	117.224	226.438	37.1145	88.7484	217.357	100.038
222699	TOB2P1	non-coding	21.1268	29.7005	62.9502	13.7291	129.214	57.0607	54.5363	6.3578	185.538	65.8135	60.0551	5.5648	55.6901	13.3556	19.6105	71.619	54.4167	21.7023	169.026	54.4013	63.1661	115.293	64.9391	132.439	54.6051	23.7033	112.062	37.6	32.2296	163.069	36.3229	17.5182	55.151	69.4728	56.5002	13.257	39.4047	168.018	57.7878	24.3352	74.3865	27.3283	22.8289	19.8641	164.526	35.3169	57.7145
222901	RPL23P8	non-coding	256.651	169.095	102.405	60.1113	48.3146	99.9668	119.845	131.288	141.854	127.971	107.989	184.752	73.8499	141.742	153.423	64.1587	72.3071	47.1346	115.044	81.7387	69.4047	38.4312	96.1599	57.0858	103.719	100.666	44.9318	190.4	134.658	91.9771	44.3946	168.856	161.115	76.0114	111.921	143.899	100.608	132.287	73.6393	122.853	223.926	51.0608	235.693	250.392	96.2579	90.1586	88.8803
245912	DEFB109P1	non-coding	0	0	0	0	0	0	0	0	0	0	0	0	0	0	0	0	0	0	0	0	0	0	0	0	0	0	0	0	0	0	0	0	0	0	0	0	0	0	0	0	0	0	0	0	0	0	0
245935	DEFB122	non-coding	0	0	0	0	0	0	0	0	0	0	0	0	0	0	0	0	0	0	0	0	0	0	0	0	0	0	0	0	0	0	0	0	0	0	0	0	0	0	0	0	0	0	0	0	0	0	0
246119	TTTY10	non-coding	0	1.188	0	0	4.4944	0	0.6733	0	0	0	2.7548	0	0.8071	0	0	0	0	1.0173	0	0	0.7798	0	0.3122	0	0.6101	0	0	0	0	0	0	0	0	0	0.7197	0	0	0	0	0	0.3834	0	0.617	2.091	0	0	0
246122	TTTY7	non-coding	0	0	0	0	3.3708	0	0	0	0	0	0	0	0	0	0	0	0	0	0	0	0	0	0	0	0	0	0	0	0	0	0	0	0	0	0	0	0	0	0	0	0	0	0	10.9775	0	0	0
246126	TXLNGY	non-coding	36.385	649.055	39.898	0	8.9888	0	403.972	23.2059	135.278	321.755	152.617	0	95.6416	0	0	0	463.66	289.251	0	71.0771	455.68	28.6918	363.409	0.2854	407.555	18.1432	0	28.8	0	118.084	6.278	454.501	0	0	236.077	163.905	110.669	0	0	310.077	445.936	0	338.732	1010.45	0.3413	169.119	0
246181	AKR7L	non-coding	7.8247	5.5441	1.3299	6.308	21.3483	1.327	5.0497	6.6757	8.9246	3.6563	8.8154	3.3389	22.1953	7.3241	3.4607	4.8492	7.8271	1.6955	15.0442	1.9136	3.6392	8.9497	4.6831	3.7106	3.0506	5.8527	16.582	8	12.8035	34.9433	8.9686	47.2019	11.7738	16.7552	2.879	11.3287	3.7728	13.3651	9.0293	3.925	6.9018	98.1661	8.021	10.9775	22.1871	5.1683	6.9257
246182	AKR7A2P1	non-coding	3.9124	1.98	1.3299	0.7421	11.236	1.7693	1.6832	5.722	2.8183	0	7.7135	2.7824	4.0355	2.1541	2.3071	0.746	2.9817	3.391	2.6549	0.8201	1.0398	3.1587	2.4977	1.4271	3.9657	1.7558	6.1514	3.2	3.0905	0.8033	2.2422	9.7324	6.1967	0	0.7197	6.0259	2.9344	2.7276	7.2235	2.7475	6.5184	6.1129	6.17	8.3638	4.7788	2.0099	2.3086
246705	LINC00314	non-coding	0	0	0	0	1.1236	0	0	0	0	0	0	0	0	0	0	0	0	0	0	0	0	0	0	0	0	0	0	0	0	0	0	0	0	0	0	0	0	0	0	0	0	0	0	0	0	0	0
246754	MTVR2	non-coding	0.3912	0	0.4433	0.3711	7.8652	0	0	0.3179	0.4697	0	1.1019	0.5565	0	0	0	0	0	0	1.7699	0.2734	1.2997	0	0	0	0	0	0	0	0.883	0.4016	1.3453	2.4331	1.859	0	0.3599	0.241	0	0.8183	0.2007	1.57	0	0	0	0	0.3413	0.2871	0.3848
252946	FAM197Y2P	non-coding	0	0	0	0	3.3708	0	0	0	0	0	0	0	0	0	0	0	0	0	0	0	0	0	0	0	0	0	0	0	0	0	0	0	0	0	0	0	0	0	0	0	0	0	53.6789	978.568	0	9.4753	0
252948	TTTY16	non-coding	0	0	0	0	0	0	0	0	0	0	0	0	0	0	0	0	0	0	0	0	0	0	0	0	0	0	0	0	0	0	0	0	0	0	0	0	0	0	0	0	0	0	0	0	0	0	0
252949	TTTY17A	non-coding	0	0	0	0	0	0	0	0	0	0	0	0	0	0	0	0	0	0	0	0	0	0	0	0	0	0	0	0	0	0	0	0	0	0	0	0	0	0	0	0	0	0	0	0	0	0	0
252950	TTTY18	non-coding	0	0	0	0	0	0	0	0	0	0	0	0	0	0	0	0	0	0	0	0	0	0	0	0	0	0	0	0	0	0	0	0	0	0	0	0	0	0	0	0	0	0	0	1.5682	0	0	0
252951	TTTY20	non-coding	0	0	0	0	0	0	0	0	0	0	0	0	0	0	0	0	0	0	0	0	0	0	0	0	0	0	0	0	0	0	0.4484	0	0	0	0	0	0	0	0	0	0	0	8.638	234.71	0	0.2871	0
252952	TTTY19	non-coding	0	0	0	0	0	0	0	0	0	0	0	0	0	0	0	0	0	0	0	0	0	0	0	0	0	0	0	0	0	0	0	0	0	0	0	0	0	0	0	0	0	0	0	0	0	0	0
252953	TTTY21	non-coding	0	0	0	0	0	0	0	0	0	0	0	0	0	0	0	0	0	0	0	0	0	0	0	0	0	0	0	0	0	0	0	0	0	0	0	0	0	0	0	0	0	0	0	0	0	0	0
252954	TTTY22	non-coding	0	0	0	0	0	0	0	0	0	0	0	0	0	0	0	0	0	0	0	0	0	0	0	0	0	0	0	0	0	0	0	0	0	0	0	0	0	0	0	0	0	0	0	0	0	0	0
252955	TTTY23	non-coding	0	0	0	0	0	0	0	0	0	0	0	0	0	0	0	0	0	0	0	0	0	0	0	0	0	0	0	0	0	0	0	0	0	0	0	0	0	0	0	0	0	0	1.234	0	0	0	0
253018	HCG27	non-coding	12.1283	12.6722	24.3821	26.7161	21.3483	6.635	3.3664	1.5894	22.0766	43.8757	43.5262	4.4519	23.0024	21.9722	11.5356	8.5794	2.9817	9.1556	18.5841	7.3811	2.8594	11.3188	2.8099	7.992	4.8809	2.9263	24.6055	13.2	10.1545	8.4346	7.6233	10.219	26.0263	7.3559	17.9937	6.749	2.9344	12.8196	5.0163	10.2051	5.7515	72.9953	14.191	41.8191	51.8837	30.4357	12.6972
253039	PSMD5-AS1	non-coding	316.901	422.935	526.654	343.97	261.798	279.553	266.285	258.444	237.206	623.4	339.945	112.41	535.513	386.882	409.513	325.643	150.205	485.927	462.832	442.045	517.286	314.557	328.442	456.115	381.32	251.079	846.216	373.2	637.528	582.388	758.296	290.998	436.251	263.179	318.488	310.214	215.888	556.969	342.714	181.729	197.853	1740.74	655.869	172.504	451.252	414.615	454.406
253724	TTC41P	non-coding	14.867	13.8602	15.5159	15.9555	33.7079	6.635	2.0199	4.1326	9.864	29.2505	19.8347	12.2426	17.3527	12.0631	28.839	7.0873	8.9452	5.0865	16.8142	6.8343	14.0369	10.2659	4.3709	6.5649	14.6427	10.2422	42.2573	8	16.3355	11.6478	12.1076	6.326	8.6754	6.5386	8.2771	6.9901	18.864	36.8222	11.4372	7.8501	8.4356	18.3387	14.191	12.023	13.9949	12.0594	4.2324
253868	C20orf166-AS1	non-coding	0	0.792	0	1.8553	19.1011	2.654	0	0.6358	4.6972	3.6563	2.2039	2.2259	2.4213	2.1541	0	3.3571	1.1182	1.0173	0	1.9136	0.2599	1.3161	0	0	0.3051	0.2926	0	1.2	0.4415	5.6231	0.4484	0.4866	1.859	0.4087	1.4395	0.241	2.9344	0.2728	1.0033	1.9625	0.7669	4.6746	0	0	0.6827	2.5842	0
254312	LINC00710	non-coding	0	0	0	0	1.1236	0	0	0	0	0	0	0	0	0	0	0	0	0	0	0	0	0.2632	0	0	0	0	0	0	0	0	0	0	0	0	0	0	0	0	0	0	0	0	0	0	0	0	0
254559	MIR9-3HG	non-coding	34.82	70.8852	20.3923	70.5009	289.888	170.74	450.766	334.102	33.3498	23.766	228.099	296.606	74.2534	33.6045	84.2098	21.2619	623.556	91.5565	79.646	72.444	29.3735	580.679	133	20.2654	27.4551	276.538	45.1993	181.6	28.2561	120.896	25.1121	132.36	351.356	360.441	23.3918	8.6773	618.738	75.2809	1837.17	242.174	20.3221	60.4099	20.3609	429.169	9.8989	71.7824	149.288
254958	REXO1L1P	non-coding	0	0	0	0	266.292	0	0	0	0	0	0	0	0	0	0	0	0	0	0	0	0.5199	0	0	0	0	0	0	0	0	0	0	0	0	0	0	0.241	0	0	0	0	0	0	0	0	0	0	0
255025	LINC00879	non-coding	0	0	0	0	10.1124	0	0	0	0	0	0	0	0	0	0	0	0	0	0	0	0	0	0	0	0	0	0	0	0	0	0	0	0	0	0	0	0	0	0	0	0	0	0	0	0	0	0
255031	LINC00957	non-coding	21.2989	24.8217	7.3146	57.0872	62.7978	41.1412	19.9057	26.0319	52.1666	88.702	66.7163	16.8837	53.6077	173.02	30.2694	31.8816	49.4782	57.1482	61.3009	41.6922	23.9849	67.3046	8.5576	23.7391	29.4745	12.9373	23.1238	15.356	28.1015	26.0829	22.4978	3.6107	21.0318	68.9783	40.7449	35.9964	23.6219	53.8149	18.3717	17.2741	9.6971	516.142	41.9682	18.1181	58.9801	65.5287	29.496
255082	CASC2	non-coding	26.9953	17.0283	30.1452	10.3896	82.0225	55.2914	34.6743	15.5766	53.5476	69.4698	11.0193	32.8325	49.6368	78.8412	5.7678	80.1984	27.2083	13.903	19.469	8.4746	28.5937	40.2738	20.6057	8.5629	48.809	105.348	69.0024	34.8	15.011	8.8362	12.1076	9.7324	4.9574	31.4671	50.0225	48.4483	40.6623	26.4574	8.4274	26.6902	46.7791	122.618	13.574	61.6832	141.315	30.1486	30.0115
255167	LINC01018	non-coding	21.9092	16.2363	46.1044	5.1948	39.3258	8.8466	57.2294	16.8481	12.6823	67.6417	14.876	36.7279	16.9492	21.1105	54.2173	13.0555	35.0354	35.2662	18.5841	77.6381	465.298	8.16	5.9319	25.1177	153.138	37.1644	318.802	27.6	56.9536	87.9606	4.9327	11.6788	70.0232	14.3032	18.7135	56.1615	33.9551	190.112	209.28	8.2426	11.8865	58.2524	1.234	61.6832	24.5765	83.2675	474.029
255193	CSNK1G2-AS1	non-coding	0	0.396	0.4433	0	3.3708	0	1.3466	0.9537	1.4091	0	0.551	1.6694	0.4036	0	0	0.746	0	0.6782	0	0.2734	0.5199	0	0	0.2854	0.3051	0	0.2675	0	1.3245	0	1.3453	1.4599	0	2.452	0	0.7231	0	0.2728	0	0.3925	0	0	0	0	0	0	0.7695
255812	SDHAP1	non-coding	298.122	283.541	247.811	287.199	314.607	197.722	71.7051	331.241	129.172	234.004	171.901	237.618	220.743	144.327	221.483	121.23	171.823	195.999	362.832	290.049	258.123	56.8571	325.632	169.545	180.593	186.7	387.537	491.6	522.737	355.859	241.704	569.83	514.95	366.163	106.163	98.8249	228.464	229.934	116.178	363.458	143.022	100.324	311.584	337.167	206.511	108.822	209.696
255926	ADAM5	non-coding	0	0	0	0	6.7416	0	0	0	0	0	0	0	0	0	0	0	0	0	0	0	0	0	0	0	0	0	0	0	0	0	0	0	1.2393	0	0	0	0	0	0	0	0	0	0	0	0	0	0
256236	NAPSB	non-coding	81.7684	131.078	43.0012	828.571	139.326	672.786	75.0715	58.8095	301.558	716.636	398.898	121.87	316.384	972.375	228.405	239.849	32.4264	294.676	225.664	282.668	91.2399	193.472	49.0165	128.158	356.916	108.859	53.4902	88	94.4812	38.1564	20.6278	32.6034	41.5182	72.3335	571.84	77.3727	370.572	35.7311	102.734	114.611	457.055	19.7771	422.644	106.639	193.198	487.259	248.942
256355	RPS2P32	non-coding	2.3474	21.7804	32.8051	16.6976	108.989	90.6779	5.7229	2.2252	26.7738	31.0786	19.8347	104.619	10.4923	16.3714	190.337	28.7222	57.7712	28.4842	157.522	31.4379	45.49	116.083	3.1221	58.5129	39.9624	16.0948	76.491	12.4	72.8477	66.6734	37.2197	3.8929	3.0984	163.874	8.637	54.7153	103.961	72.5533	91.4974	57.3055	112.73	8.2704	58.6148	57.5013	8.1922	23.5446	149.673
256369	LINC00521	non-coding	0	0	7.5363	0	5.618	0	0.6733	0.3179	0	1.8282	0	0	0	0	0	0	0	0.3391	0	0.2734	0	0.2632	0	0.2854	0	0	0	0	0.883	0.8033	0.8969	0	0	0	0	0	0.8384	0.2728	0	0	0	0	0	0	0	0	0
256880	LOC256880	non-coding	1.1737	2.376	6.6497	2.9685	20.2247	1.327	2.0199	0.6358	4.2274	3.6563	2.2039	5.5648	4.8426	1.7233	6.9214	2.9841	1.8636	2.7128	2.6549	1.3669	2.5994	2.1058	0.6244	0.8563	0.6101	1.1705	12.0353	1.6	2.649	3.2132	8.0717	6.8127	10.5345	9.8079	2.1592	3.8566	2.5152	5.4551	0.602	1.1775	4.2178	16.5408	22.2119	30.3189	17.067	2.5842	3.0781
257000	TINCR	non-coding	355.634	417.787	38.1248	743.228	676.404	987.725	1126.41	329.969	314.709	56.6728	660.606	3453.53	524.213	34.4661	9.2285	367.793	598.956	587.657	692.92	344.724	53.8082	132.403	818.92	78.2075	144.292	664.569	25.6753	547.6	50.3311	151.822	354.709	872.019	312.316	3086.64	521.098	857.608	158.876	254.482	201.053	497.694	15.3374	167.925	14.808	384.213	51.5423	220.803	919.969
257203	DSCR9	non-coding	2.7387	0.792	3.5465	3.3395	8.9888	3.5386	1.0099	1.2716	1.8789	1.8282	1.1019	2.2259	1.6142	2.585	5.7678	1.119	2.609	1.3564	0.885	5.4675	5.7187	2.369	1.2488	7.4212	3.9657	0.8779	3.7443	2.8	6.6225	1.2049	8.9686	8.7591	2.4787	4.0866	0.7197	5.0618	2.9344	15.2744	24.0783	3.925	0.3834	6.4725	1.851	7.3183	12.9709	1.7228	4.6172
257358	LINC01366	non-coding	1.5649	1.188	1.7732	1.1132	20.2247	1.7693	2.0199	0.3179	9.864	9.1408	3.3058	0.5565	5.6497	6.0316	8.0749	2.9841	1.8636	0.6782	2.6549	2.7337	1.5597	1.8426	0.6244	0.8563	8.5416	4.9748	3.4769	1.2	0.883	7.6313	0.4484	0.4866	1.859	8.9906	3.2389	1.2052	4.6112	3.5458	1.6052	7.8501	8.0521	0	21.5949	4.1819	0.3413	5.1683	1.9238
259234	DSCR10	non-coding	0	0	0	0	3.3708	0	0	0	0	0	0	0	6.4568	0	0	0	0	0	0	0	0	0	0	0.2854	0	0	0	0	0	0	0	0	0	0	0	0	0	0.5455	0.2007	0	0	0	0	0.5227	0	0	0
259283	MDS2	non-coding	0.7825	0.792	0.4433	2.2263	10.1124	2.654	1.3466	0	0	12.7971	1.1019	0.5565	1.2107	3.4466	0	1.8651	2.9817	1.6955	0	1.6402	0.7798	0	0	0	0.9152	1.4632	0.5349	0.8	0	0.8033	0.8969	0	0.6197	0.8173	1.4395	0	0.8384	0	0.4013	0.3925	0	0	1.851	1.5682	7.8508	2.297	1.5391
260294	NSUN5P2	non-coding	246.831	383.901	302.108	278.353	164.292	90.209	127.12	186.439	293.901	502.706	308.854	453.011	324.366	156.347	244.474	80.2469	266.985	141.624	300	156.318	137.102	132.003	207.565	145.98	99.8358	127.45	423.693	418.572	428.247	897.194	670.26	592.555	1430.62	314.753	211.642	235.693	320.83	178.909	100.605	235.655	207.665	799.676	1684.58	2117.09	554.739	204.781	164.075
260341	TFAMP1	non-coding	0	0.792	0	0.3711	19.1011	0	0	0.9537	1.4091	0	0.551	0	0.4036	0	2.3071	0.746	0	0	0	0.2734	0	0	0.3122	0	0	0	0.8024	0	0	0.8033	0.4484	0.4866	1.859	6.13	0	0	0	1.3638	0	0	0.7669	1.7979	1.234	0	0	0.2871	0
266655	LINC00094	non-coding	306.671	689.65	380.734	283.058	800.27	639.164	517.448	296.238	435.408	517.02	320.308	813.712	541.586	671.521	658.048	568.114	214.133	401.312	698.239	394.527	631.412	429.226	777.634	546.08	525.06	161.097	854.94	471.74	759.846	391.557	915.327	451.353	401.394	327.732	581.97	357.05	391.159	782.037	773.171	288.721	597.147	1284.45	304.513	633.769	630.926	418.167	555.922
266695	PHF2P1	non-coding	0	0.792	4.8764	0	39.3258	0	1.3466	1.2716	1.8789	0	0	0	34.3019	0	0	2.2381	0	0.3391	68.1416	0	5.4588	0	0	45.0978	0	0.5853	1.0698	0.4	1.3245	1.2049	8.5202	0.9732	0	300.368	0	81.4703	0.4192	4.0914	4.013	374.841	0	0	103.656	0	7.1681	0.2871	70.4117
266697	POM121L4P	non-coding	0.3912	0.396	0	0.3711	10.1124	0	0.3366	0	0.4697	0	0	0	0	0.4308	0	0	0.7454	0.3391	0	0.2734	0	1.8426	0	0	0.3051	0.2926	0.2675	0	0	0	0.8969	0	0	0	0.3599	0	2.096	0	0	0.3925	0.3834	0	0	0.5227	0	0.2871	0.3848
266971	PIPSL	non-coding	260.955	195.627	225.646	132.468	167.416	272.476	154.856	153.858	244.722	127.971	301.928	365.053	165.86	169.746	261.858	161.143	207.976	107.155	184.956	242.482	116.974	155.304	163.909	239.475	194.321	184.066	243.916	322.4	233.996	245.005	190.583	171.776	331.526	166.735	186.415	217.174	172.291	260.755	168.147	213.129	239.647	116.864	175.227	376.372	225.967	213.624	151.212
280655	IGBP1P1	non-coding	1.9562	0.792	1.7732	2.5974	3.3708	1.327	2.0199	0.6358	2.8183	1.8282	11.5702	1.113	2.0178	1.2925	5.7678	4.1032	2.9817	3.391	1.7699	1.6402	1.0398	0.2632	1.2488	0.2854	0.3051	1.4632	2.942	1.6	1.766	1.2049	6.278	1.9465	5.5771	0.4087	1.0796	2.4104	1.6768	1.9093	1.8059	0.3925	0.7669	1.0787	1.851	2.6137	1.024	1.4356	0.3848
280657	SSX6	non-coding	0	0	0.8866	2.2263	5.618	0	1.0099	0	0	0	0	0.5565	48.4262	0	1.1536	0.746	0	0	10.6195	0.2734	0.5199	1.0529	0.3122	0.2854	0	0.5853	3.4769	0.4	0	0	2.6906	0	0	0	0	0	0.4192	0	0.602	0.785	0.7669	0	0	0	0	0.2871	0
280659	SSX8	non-coding	0	0	0	0	5.618	0	0	0	0	0	0	0	0.4036	0	0	0	0	0	0	0	0	0	0.3122	0	0	0	0	0	0	0	0	0	0	0	0	0	0	0	0	0	0	0	0	0	0.3413	0	0
280660	SSX9	non-coding	0	0	0	0	1.1236	0	0	0	0	0	0	0	0	0	0	0	0	0	0	0	0	0	0	0	0	0	0	0	0	0	0	0	0.6197	0	0	0	0	0	0	0	0	0	0	0	0	0	0
282566	LINC00515	non-coding	0	2.376	0.8866	0	2.2472	1.7693	1.0099	0.9537	0.9394	0	0	1.6694	1.2107	0	0	0.746	0	0.3391	0	1.0935	0.5199	0.2632	0.9366	0	0.6101	0	2.1396	0.4	0.4415	0.4016	0	0	1.2393	0	0.7197	1.4462	0	0.8183	4.4143	0	0	5.3937	4.319	2.6137	0	0.2871	0
282997	PDCD4-AS1	non-coding	47.7308	59.005	23.0522	65.3061	38.2022	51.3104	317.455	35.2857	50.2596	93.2358	38.0165	33.9455	57.3043	44.806	39.221	41.4047	79.7615	39.3354	97.3451	45.9267	19.7557	119.242	16.2348	20.5509	64.0618	41.5539	40.3851	29.6	50.3311	16.8692	15.6951	30.6569	15.4919	74.7855	40.3059	24.8268	74.1983	94.3738	40.3311	24.7277	73.6196	182.309	37.6369	27.1824	125.954	53.6932	108.503
283011	FLJ37201	non-coding	6.651	4.3561	16.8458	8.5343	48.3146	4.8656	13.8024	2.5431	6.576	14.6252	3.8567	6.6778	15.3349	4.3083	19.6105	6.3413	4.8453	3.7301	8.8496	6.2876	42.8906	15.2672	9.3662	2.8543	3.3556	7.9011	17.6518	10.8	10.596	2.8115	17.0404	1.9465	16.7312	6.5386	4.3185	11.5697	5.4496	12.8196	1.4046	7.0651	8.4356	21.575	1.234	6.7956	36.182	4.3069	12.3124
283025	LINC01553	non-coding	0	0	0	0	15.7303	0	0.3366	0	0	0	0	0	0	0	0	0	0	0	0.885	0	0	0.5265	0	0	0	0	0	0	0.4415	0	0.4484	0.4866	0	0	0	0	0	0	0	0	0	0	0	0	0	0	0
283050	ZMIZ1-AS1	non-coding	12.5196	16.2363	73.1464	226.345	51.6854	16.8086	13.4657	6.0399	11.2732	18.2815	34.7107	20.5899	54.883	25.4188	18.4569	36.5555	26.4629	23.0587	31.8584	20.2296	7.0185	4.7381	27.7865	7.4212	19.8287	10.2422	50.8157	14.8	11.0375	14.4593	51.1211	5.3528	7.4361	136.494	25.1912	6.508	15.9296	18.2747	8.2267	24.3352	23.3896	175.836	45.6579	118.662	23.2111	24.6931	15.3905
283102	KRT8P41	non-coding	1.9562	0.396	0.8866	0.7421	16.8539	0.4423	1.0099	0.6358	1.4091	3.6563	4.4077	0	1.6142	0.4308	0	0.746	1.8636	0	1.7699	1.0935	5.1989	0.7897	0.3122	1.998	0.3051	2.6337	4.0118	1.6	3.532	3.2132	1.3453	5.8394	0	1.226	0.3599	2.4104	0.8384	5.1824	1.6052	1.1775	2.3006	0	0.617	0.5227	1.3654	0.8614	0.7695
283120	H19	non-coding	1361.5	489.86	243.821	128.757	2117.98	825.39	3120.69	4800.76	30587.9	745.887	1703.58	399.555	15740.9	259.788	2438.62	838.912	235.93	18790.1	2909.73	253.69	431.245	136857	640.649	299.7	356.001	19076.5	821.343	392	603.532	111760	956.502	17355.2	461.038	82181.9	819.793	3941.67	90.1279	92009.3	3516.83	12397.2	511.887	104.639	7779.11	100.366	239.279	863.685	374.76
283131	NEAT1	non-coding	2985.13	4082.04	13666	19591.5	2786.52	3224.59	612.692	5997.62	14478.5	22327.2	10387.9	4897.61	26037.5	5155.27	2656.65	4708.58	768.17	7541.54	2507.08	2153.91	2923.06	2885.23	3263.19	2561.72	1873.96	1939.57	4663.01	7719.2	13308.2	19086.3	19714.3	16076.9	17259.8	6170.82	5171.75	9947.09	1333.89	4021.8	2783.85	11567.1	8974.69	11875.6	7176.31	2714.06	6038.99	6361.07	4926.51
283174	MIR4697HG	non-coding	2.7387	18.6123	29.2586	15.5844	51.6854	7.962	99.9832	139.236	61.063	20.1097	22.5895	69.5604	75.0605	28.8654	26.5319	40.2857	1.1182	73.2452	4.4248	69.9836	14.8167	13.4246	60.8804	11.7026	86.9411	4.0969	2.942	18.8	20.7506	6.4263	47.9821	141.606	387.916	101.349	11.1561	45.5559	0	99.2835	92.0993	31.7928	2.3006	577.85	3.085	3.1364	11.2642	30.7228	21.9315
283197	LINC00301	non-coding	0	0	0	0	0	0	0	0	0	0	0	0	0	0	0	0	0	0	0	0	0	0	0	0	0	0	0	0	0	0	0	0	0	0	0	0	0	0	0	0	0	0	0	0	0	0	0
283267	LINC00294	non-coding	190.923	255.028	253.131	249.351	144.944	143.758	165.965	236.51	258.344	255.941	295.868	623.817	240.113	178.362	241.094	164.5	204.622	175.653	211.504	242.209	156.486	166.096	203.559	192.379	172.052	72.8656	211.554	182.8	250.331	63.0585	519.731	331.387	303.641	128.32	201.889	221.512	99.7694	319.671	194.833	93.4158	164.877	384.034	111.06	101.934	237.231	223.1	115.429
283303	MRGPRG-AS1	non-coding	0.3912	0	0.8866	0	10.1124	0	0	0	0	0	0	0	0	0	0	0	0	0	0	0	0	0	0	0.2854	0	0	4.0118	0	0	0	0.4484	0	0	0	0	0.241	0	53.4603	20.0652	0	0	0	0	0	5.1201	0	0.3848
283314	C1RL-AS1	non-coding	10.9624	57.8843	100.406	73.5881	87.9213	15.5258	78.6568	86.3546	91.6979	164.607	108.612	43.4391	228.802	65.9811	42.7278	56.814	53.7346	91.6446	41.6637	73.1137	113.382	43.2456	45.9975	38.3245	115.5	23.1502	235.839	34.044	75.5673	117.554	134.924	73.1679	105.444	74.8999	46.8988	145.138	84.4309	84.3746	45.225	93.0704	171.867	35.2715	81.1291	34.5844	46.1935	67.8315	30.808
283332	LOC283332	non-coding	0	0	0	0	12.3596	0	0	0	0	0	0.551	0	0	0	0	0.373	0	0	0	0	0	0	0	0	0	0	0.8024	0	0	0	0	0	0	0	0	0	0	0	0	0	0	0	0	2.091	0	0	0
283345	RPL13P5	non-coding	19.5618	11.4842	35.4649	13.7291	19.1011	7.962	39.3873	12.3977	12.6823	20.1097	15.978	25.5982	28.6521	26.2804	29.9925	23.5	5.5908	13.903	10.6195	34.1717	46.0099	15.2672	21.2301	21.6926	34.4714	7.9011	21.6635	10	33.1126	11.2461	25.1121	9.2457	15.4919	11.8512	16.5542	43.8686	13.8336	6.5462	21.0685	7.4576	16.4877	7.5512	11.723	5.2274	13.9949	26.4159	2.3086
283392	TRHDE-AS1	non-coding	0	0	0	0	13.9438	0	0	0.3179	2.776	0	0.6006	0	4.5036	1.9086	0	0.3917	0	1.1292	0	0	0.6733	0	0.3122	0	9.0083	0	2.9232	0	0	3.9	0	0	0	1.4875	0	0.241	1.0857	7.689	6.1299	0	0	3.2362	0	2.091	0	4.2466	3.7899
283404	LINC00592	non-coding	8.216	9.5042	0.8866	15.2134	3.3708	1.7693	3.7031	4.1326	0.9394	0	2.7548	5.5648	1.6142	0	3.4607	4.1032	3.7272	2.3737	3.5398	4.9207	5.1989	5.5278	23.7278	4.8523	2.4405	22.8254	0.2675	0.4	2.2075	2.4099	1.7937	23.8443	0.6197	1.226	1.4395	0.7231	1.2576	3.5458	2.0065	7.8501	4.6012	0.3596	0	7.3183	3.7547	3.1584	6.9257
283416	LINC01465	non-coding	8.9984	12.6722	12.856	11.5028	29.2135	18.1356	11.7825	9.2188	16.44	7.3126	7.7135	3.8954	16.1421	9.4782	10.382	13.4286	15.2814	17.6331	30.9735	15.3089	27.8139	29.4814	17.1714	11.988	11.5921	16.6801	28.6173	6.8	21.6336	15.2626	24.6637	6.8127	8.0558	19.2072	11.1561	6.508	12.9952	41.1863	21.4698	11.7751	7.6687	35.9583	9.872	25.6142	22.8698	7.1782	21.162
283422	LINC01559	non-coding	94.6792	20.1963	0.4433	51.2059	131.461	37.1558	0.3366	34.332	6.576	98.7203	312.397	42.2927	4.4391	2.1541	0	19.7698	638.092	51.882	126.549	139.42	1.0398	0.5265	57.7584	5.994	2.1354	86.3267	1.6047	182	3.0905	71.8948	2.6906	79.8054	184.043	121.373	12.2357	0.241	211.276	34.3674	0	128.741	0	0	0	3.1364	1.024	58.2873	66.1793
283458	NME2P1	non-coding	83.7246	64.9451	101.962	66.4193	93.2584	61.0417	82.8143	120.162	69.0482	69.4698	245.73	173.066	35.5125	42.221	69.2135	96.238	80.5069	63.4113	80.531	54.9481	42.8906	21.3214	39.3381	62.7943	56.7405	73.1582	44.1294	75.6	151.876	161.864	114.798	444.282	376.762	15.9379	48.9429	145.104	71.2639	30.8215	52.9722	62.8005	58.2822	23.0133	103.039	334.03	57.6865	64.6041	38.4763
283460	HNF1A-AS1	non-coding	0	0	0.8866	0	17.9775	0.4423	0	0	0	43.8757	0	0	2.0178	0	0	0	0	0.3391	0	0	0	0	0.3122	0	0	0	1.3373	0	0	0.4016	0.8969	0.9732	0.6197	0.8173	1.0796	13.7391	0.4192	4.0914	7.2235	0	0.3834	0.7192	80.2098	0	0	0.2871	1.1543
283487	LINC00346	non-coding	10.5634	26.1364	48.321	66.0482	70.7865	42.9061	41.0705	44.8224	90.6551	148.08	46.281	22.8158	71.4286	64.1931	40.3746	44.0158	33.1718	155.985	28.3186	37.4522	9.3579	30.2711	40.5869	18.5529	33.8613	32.4823	142.284	14.4	8.3885	942.263	233.184	2.9197	8.0558	34.3277	47.5034	41.6993	82.1631	96.8287	16.6541	261.8	50.2301	113.988	29.6159	25.0915	77.1428	94.4656	23.4706
283491	OR7E156P	non-coding	0	0	0	0	12.3596	0	0	0	0	0	0	0	0.4036	0	0	0	0	0	0	0	0	0	0	0	0	0	0	0	0	2.4099	0	0	0.6197	0	0	5.3028	0	36.5494	0.602	0	0	0	0	0	0.3413	0	0
283507	SUGT1P3	non-coding	22.7426	13.2543	40.4965	23.8887	70.382	12.2128	9.3015	19.7727	20.8789	28.117	17.2617	21.5248	19.3826	17.5863	42.2087	19.2737	6.4294	21.6684	35.3805	17.2854	19.7271	12.8955	25.2232	16.749	13.6909	18.7022	34.4584	23.656	62.287	18.3512	18.2466	46.4818	37.0875	29.4647	13.632	25.0461	14.5923	65.1125	19.5094	24.3744	28.9839	145.383	30.0046	78.437	73.2652	26.0455	26.0485
283521	LINC00282	non-coding	0.3912	0	1.3299	5.1948	24.7191	1.327	2.6931	0.3179	1.4091	3.6563	2.7548	0	3.2284	0.8617	1.1536	2.2381	2.609	2.0346	0.885	2.7337	0.5199	2.6323	0	0.5709	0.9152	0.5853	4.5467	0	0	1.6066	5.8296	0.4866	6.1967	1.6347	1.7994	0.7231	2.5152	1.091	0.2007	1.1775	0	30.5645	7.404	0	3.7547	2.5842	1.9238
283551	LINC01588	non-coding	8.6072	3.9601	2.6599	7.4212	24.7191	2.654	6.7329	2.2252	1.8789	12.7971	11.5702	3.8954	16.9492	6.8932	0	2.9841	21.9903	9.1556	2.6549	7.1077	1.2997	6.3175	7.8052	1.7126	7.0163	3.219	11.5004	2.4	1.766	2.8115	9.8655	1.4599	9.2951	7.7646	5.3981	0.9641	4.6112	1.9093	3.2104	10.2051	4.6012	0.7192	4.319	10.4548	3.0721	6.8911	5.3867
283592	FAM181A-AS1	non-coding	1.1737	0	0.4433	0.7421	6.7416	2.654	3.3664	6.0399	7.5155	12.7971	1.1019	2.2259	0.4036	0.8617	0	4.4762	0	0.3391	0	0.5467	0.2599	0.5265	0.3122	0.2854	1.2202	2.3411	0	2	0	0.4016	0	0	0.6197	1.6347	1.7994	0.241	2.096	16.3654	2.2072	0	0	0.3596	0	3.1364	0	2.8713	1.1543
283596	SNHG10	non-coding	140.845	133.058	106.838	181.818	77.5281	46.0024	60.2592	50.8623	78.9122	91.4077	96.9697	75.6817	123.487	59.4541	308	39.1666	167.723	44.4218	163.717	36.0853	85.7811	91.0766	75.242	70.5009	45.4534	69.354	128.644	41.6	116.115	218.496	200.448	307.056	182.804	137.72	57.5798	106.779	108.992	51.0055	31.703	129.133	121.166	188.781	178.312	538.421	176.473	63.4556	232.012
283601	LINC00523	non-coding	0	0	0	0	12.3596	0	1.0099	0	0	0	0.551	0	0	0	0	0	0	0	0	0	0	0	0	0	0	0	0	0	0	0.8033	0	0	0	1.226	0	0	0	0	0.2007	0.3925	0	23.0133	0	0	0	0	0
283651	HMGN2P46	non-coding	17.6056	23.7604	25.2688	60.1113	103.371	24.7705	29.6246	37.5109	25.8344	100.548	29.7521	22.2593	31.0734	61.1774	26.5319	54.8333	68.2072	32.2143	15.9292	24.6036	19.4957	26.0595	27.7865	31.1117	32.0309	27.5075	80.7703	16.8	33.1126	68.6816	56.5022	89.0511	40.8985	14.7119	17.274	27.2371	44.4351	22.3661	54.1761	21.9802	119.632	51.7799	59.2318	124.412	60.0758	37.3268	17.6991
283663	LINC00926	non-coding	6.2598	30.0965	18.6191	134.694	38.2022	26.9822	8.7527	25.749	59.6539	180.987	113.499	19.4769	48.0226	71.0864	6.9214	11.9365	6.7089	29.5015	54.8673	19.6829	14.0369	60.0158	6.2441	7.7066	48.809	8.779	18.989	71.6	37.0861	16.0659	8.9686	16.545	40.2789	11.4426	36.3473	13.257	7.5456	101.193	55.9819	13.7376	9.2025	12.5854	115.996	20.9096	24.9178	48.812	25.0096
283673	EWSAT1	non-coding	7.8247	24.9484	28.8152	1.4842	28.0899	0.4423	1.6832	0.3179	2.8183	0	7.7135	16.6945	6.8604	2.1541	6.9214	13.0555	0.7454	1.0173	15.0442	58.7753	2.5994	3.9484	12.8005	95.0478	29.5905	5.2674	196.309	118.8	24.2826	30.1235	0	4.8662	1.859	4.904	4.3185	1.4462	2.5152	11.7285	389.065	1.57	90.4908	23.7325	0	125.457	1.3654	30.4357	0.3848
283687	ST20-AS1	non-coding	42.0266	77.8153	19.9712	46.1818	86.1798	61.7406	61.8818	38.6903	88.7199	41.298	58.9366	26.8169	83.1073	86.329	18.7915	94.981	85.71	91.2614	86.177	54.1881	88.1076	83.572	103.753	96.9402	70.5809	68.4234	65.1351	57.036	109.691	81.6267	62.0673	48.4866	47.8327	131.361	73.1012	17.4534	84.062	97.0387	51.092	86.8099	62.059	129.115	23.1004	80.9357	95.6332	31.3631	86.0254
283731	LOC283731	non-coding	2.7387	6.7321	0	10.3896	28.0899	67.2343	7.0695	1.9073	2.3486	10.9689	12.6722	1.113	2.4213	6.4624	3.4607	11.9365	4.0999	3.391	2.6549	7.1077	4.419	7.8968	4.6831	0.8563	9.7618	0	2.1396	2.4	0.4415	2.4099	0.4484	0.4866	1.859	0.8173	16.5542	2.6514	5.0304	0.5455	3.8124	2.355	0.3834	0	1.234	3.1364	3.0721	15.2179	5.0019
283761	LINC00928	non-coding	0.7825	0	0.8866	1.1132	25.8427	0.8847	3.0298	1.5894	0.4697	0	1.6529	3.3389	0	0.4308	0	0.373	0.3727	4.0692	0	1.6402	0.2599	0.2632	4.0587	0.8563	0	1.7558	0	2	6.6225	0	0	0	1.859	1.226	0	0.241	0	4.9096	1.4046	1.9625	3.8344	0.3596	0	24.5687	0	1.1485	0
283768	GOLGA8G	non-coding	0	0	0	0	19.1011	29.6362	2.6931	0.6358	0.6106	1.8282	1.1019	0	0.4036	0	0	0	4.0999	0.3391	0	0	0	0	0	0	0.6101	0.8779	0	1.2	0.883	0.8033	5.8296	1.4599	0.6197	0.8173	1.4395	137.048	0	1.3638	2.0065	1.57	0.3834	0	4.936	0	0	0.2871	0.3848
283796	GOLGA8IP	non-coding	0	0	2.2166	0.3711	3.3708	0	0.6733	0	0.9394	1.8282	1.1019	1.113	1.2107	1.2925	0	0.373	0.7454	0.3391	0	0.5467	0.2599	0	0	0	0.3051	0	1.8722	0	0.883	0	0.8969	0	0	0.4087	1.0796	0.7231	0.4192	1.091	0	0.3925	1.5337	0	13.574	0	0	0.5743	0.3848
283856	LOC283856	non-coding	0.3912	0	0	0	12.3596	0	1.0099	0	0.4697	0	1.1019	0.5565	2.8249	1.7233	1.1536	0.746	0.3727	0.3391	0	0	0	0.2632	0.3122	0	0.3051	0	0.2675	2	0.4415	2.4099	0	0	0.6197	0.8173	1.0796	0.241	0.4192	1.3638	0.4013	1.9625	0	12.945	0	0	8.1922	2.8713	3.0781
283860	LINC00304	non-coding	0	1.188	0.4433	0.3711	12.3596	0.4423	0	0	0.9394	1.8282	1.1019	0	1.2107	0.4308	0	0.373	0.3727	0.3391	0.885	1.0935	0.2599	0	0	0	0.6101	0	0	0	0	1.2049	0	0.9732	0	0	0	0	0	0.5455	0.2007	0.3925	0.3834	0	0	0	0.6827	0.2871	1.1543
283867	LINC00922	non-coding	4.6948	1.98	7.093	8.1633	16.8539	6.1926	3.0298	1.5894	4.2274	3.6563	1.6529	1.113	4.4391	3.4466	1.1536	5.2222	2.2363	3.391	0.885	1.3669	0.7798	7.6336	4.0587	0.8563	6.1011	0.8779	0.8024	0.8	1.3245	0.4016	3.5874	0.9732	0	2.452	17.9937	1.9283	4.192	2.1821	1.8059	2.355	1.5337	0	2.468	1.5682	5.1201	5.4555	12.6972
283902	HCCAT5	non-coding	0	0	0	0	8.9888	0	0	0	0	0	0	0	0	0	0	0.373	0.3727	0	0.885	1.0935	0	0	0	0	0	0	0	0	0	0	0	0	0	0	0	0	0.4192	0.8183	0	0	0.3834	2.1575	0	1.0455	0	0.5743	0.3848
283914	LINC01566	non-coding	0	0	0	0	11.236	0	0	0	0	0	0	0	0	0	0	0	0	0	0	0	0	0	0	0	0	0	0	0	0	0	0	0	0	0	0.3599	0	0	0	0	0	0	0	0	0	0	0	0
283922	LOC283922	non-coding	74.3349	53.8569	74.033	43.7848	19.1011	11.5006	17.8421	16.8481	45.0927	47.532	63.3609	27.8242	34.3019	48.2526	36.9139	31.7063	21.9903	45.1	85.8407	53.0344	85.0013	41.3267	50.5776	34.8223	63.7568	38.6276	174.913	58.4	99.3377	38.5581	117.937	24.8175	17.9706	109.113	75.9334	61.4643	53.2383	64.9161	12.6411	53.3804	63.6503	48.1841	17.276	65.8651	46.7636	61.1586	81.5698
283932	FBXL19-AS1	non-coding	21.1268	15.0483	58.0738	47.4954	32.5843	13.2699	9.0894	8.9009	30.0618	54.8446	17.6309	18.9204	102.502	52.5608	28.839	23.127	13.7905	35.6053	30.9735	26.7906	45.49	48.4338	9.3662	39.96	27.7601	17.2653	476.865	38	34.4371	98.4035	36.7713	13.6253	60.1084	39.2317	21.9523	28.4423	7.9648	385.678	103.336	19.6252	12.2699	23.0133	143.144	37.1145	56.3211	30.7228	13.4667
283970	PDXDC2P	non-coding	215.18	186.123	281.946	392.579	76.4045	77.8503	75.4082	178.018	259.283	497.258	387.328	93.4891	328.894	277.883	166.113	108.174	152.069	140.048	128.319	153.363	128.152	72.6507	114.892	47.3812	55.2152	83.1078	359.187	183.6	288.3	478.361	330.942	367.883	183.424	196.567	163.023	133.534	116.118	102.829	97.3163	240.212	238.497	501.618	230.14	503.921	279.558	200.129	128.126
283981	LINC00685	non-coding	3.1299	8.3161	10.1962	23.7477	10.1124	2.654	6.3962	14.9408	19.2583	34.7349	13.2231	6.1213	28.6521	10.3398	5.7678	4.8492	1.8636	12.2075	11.5044	4.6473	1.5597	1.3161	1.2488	4.8523	5.186	2.6337	14.4424	13.2	42.8256	8.0329	9.417	18.9781	28.505	15.9379	3.2389	17.8367	2.9344	14.4561	9.6313	3.14	4.6012	25.1708	12.957	3.1364	6.8268	12.0594	9.6191
283982	LINC00469	non-coding	0	0.792	0	2.5974	4.4944	0.4423	0	0	1.4091	1.8282	0.551	1.113	13.7207	3.8774	0	2.9841	0	1.6955	0	0	0	1.0529	0	0	0.9152	0.2926	0	1.2	0.883	0	0	0	0	0	2.879	1.6873	2.9344	0.2728	0.2007	0	0	2.8767	0	0	0.6827	1.1485	0
284009	LOC284009	non-coding	0	0.396	2.2166	1.1132	0	0	0	0.6358	2.3486	0	0	1.113	2.0178	1.2925	0	0	0	2.0346	1.7699	1.3669	2.5994	1.0529	0.6244	1.998	0	0	5.349	0	1.3245	0	0.8969	1.9465	3.0984	0.8173	0.3599	0.241	0	0.5455	1.2039	0.785	1.1503	3.2362	0.617	1.5682	1.7067	0.5743	0.7695
284023	LOC284023	non-coding	111.894	273.245	58.9604	262.338	88.764	369.789	117.489	133.196	139.975	96.8921	104.132	166.388	180.791	73.2405	313.768	85.7936	89.0794	78.6707	156.637	132.859	141.669	106.607	162.348	129.87	148.562	159.192	113.132	128	99.7792	86.3541	326.457	154.744	186.522	202.697	102.204	156.433	150.912	324.853	335.49	80.8557	91.2577	248.472	74.6568	164.663	170.67	100.208	166.218
284029	LINC00324	non-coding	84.507	81.1814	22.1656	77.18	67.4157	91.5625	18.852	7.9472	46.5019	111.517	106.887	30.6066	28.6521	88.7503	84.2098	47.746	124.115	40.0136	100.885	118.371	31.4531	50.0132	44.0212	53.3752	40.8776	47.1139	15.5122	20.8	18.1015	9.2379	29.148	16.545	14.2525	39.6404	87.8093	46.52	142.528	27.0029	31.1011	20.8027	45.2454	55.0162	336.264	76.3199	59.3932	104.515	75.7984
284047	CCDC144B	non-coding	2.0423	1.188	6.9822	14.8386	38.6966	4.3304	2.3565	3.4968	7.957	10.9689	12.6722	9.4602	10.3511	18.6376	9.2285	10.4444	1.4909	13.903	5.3097	15.8557	6.4986	30.7976	23.5092	22.7201	11.5921	0.5853	3.4769	4.8	5.7395	1.5182	32.9776	36.2579	19.2099	9.3993	6.1179	18.5478	24.3136	5.4497	9.1196	3.14	4.9847	15.5807	18.331	9.932	24.9178	10.6927	13.8515
284085	KRT18P55	non-coding	0	0	0	0	5.618	0	0	0.3179	0	0	0	1.113	0	0	0	0	1.1182	0.3391	0	0	0	0	0.3122	0.2854	0	0	0.2675	0	0.4415	0	0	0	0.6197	0	0	1.4462	0.4192	0.8183	0.602	0.3925	1.1503	0.3596	0	0	0	0	0.3848
284100	YWHAEP7	non-coding	0.3912	1.98	3.5465	0	11.236	3.5386	0	0	0	7.3126	2.2039	0.5565	0.8071	0	0	1.8651	0	0.3391	0.885	1.0935	0	0	1.2488	0	2.4405	0.2926	0	0.8	0.883	1.6066	2.2422	1.4599	4.9574	0.8173	0.3599	0	1.2576	2.4548	3.0098	0.785	12.2699	0	0	0.5227	0.3413	1.7228	1.5391
284123	FAM27E5	non-coding	0	0	0	0	0	0	0	0	0	0	0	0	0	0	0	0	0	0	0	0	0	0	0	0	0	0	0	0	0	0	0	0	0	0	0	0	0	0	0	0	0	0	0	0	0	0	0.3848
284124	FLJ36000	non-coding	0	0.792	0	0	26.9663	0	18.852	0.3179	2.3486	0	0	0	2.8249	0	2.3071	0	0	0.3391	11.5044	0	0	2.8955	6.8686	8.5629	0.6101	0	30.4894	21.6	5.7395	0.8033	0	1.4599	0	1.226	0.7197	0	0.4192	0.2728	10.4339	10.9901	0.3834	0	1.234	1.0455	20.1391	0.2871	6.541
284185	LINC00482	non-coding	11.3459	2.376	9.7529	6.308	14.6067	4.8656	31.9811	5.4041	16.9098	27.4223	12.1212	1.6694	46.0048	19.818	0	4.8492	11.9269	16.2767	0	4.374	0.5199	9.213	11.8639	1.998	2.4405	1.1705	0.5349	6.8	9.2715	234.16	3.139	4.8662	27.2657	43.727	5.758	0.241	3.7728	4.9096	2.8091	17.2701	13.8037	7.1917	48.7429	3.6592	12.6296	7.4654	7.6953
284232	ANKRD20A9P	non-coding	11.3459	8.7121	15.5159	7.4212	392.135	4.8656	8.4161	5.0862	9.3943	3.6563	11.0193	5.0083	9.2817	5.6007	10.382	8.9524	9.3179	5.7647	8.8496	7.3811	17.6761	14.4775	6.5564	9.1337	10.3719	12.2906	10.4306	14.8	18.543	10.0412	8.0717	71.5328	4.9574	16.3465	7.5574	16.3905	4.6112	34.9129	7.4241	8.6351	4.9847	12.945	26.5309	16.2049	13.3123	8.3268	7.6953
284233	CYP4F35P	non-coding	0.7825	5.9401	3.1032	8.1633	19.1011	1.7693	1.6832	5.722	20.1978	38.3912	17.0799	0.5565	12.5101	4.7391	8.0749	4.1032	42.4898	5.0865	3.5398	4.374	18.9758	2.6323	1.8732	13.986	3.3556	0.2926	0.5349	5.6	84.7682	21.2873	0.4484	25.7908	12.3935	6.9473	5.0382	10.6056	2.9344	21.0023	8.4274	1.1775	1.9172	16.9004	33.9349	18.2959	1.7067	20.3862	4.6172
284276	LINC00908	non-coding	7.0423	3.9601	12.4127	3.7106	19.1011	34.5018	7.0695	3.8147	6.576	25.5941	6.6116	3.8954	10.8959	24.1263	5.7678	29.8413	5.5908	10.512	1.7699	15.0355	4.419	24.7434	2.1855	2.8543	4.8809	16.6801	12.3028	1.6	7.5055	6.0247	4.0359	0.4866	8.6754	5.3126	15.4746	5.0618	10.48	60.2792	12.0391	5.495	6.9018	201.366	0	5.2274	1.024	10.6238	12.6972
284367	SIGLEC17P	non-coding	17.9969	11.8802	7.093	20.7792	29.2135	10.1736	3.0298	7.3115	34.759	7.3126	17.6309	8.9037	38.7409	46.5293	10.382	34.6905	12.2997	12.8857	12.3894	19.4095	7.0185	4.7381	4.9953	8.2774	4.5758	4.3895	16.0471	10	2.649	2.4099	3.139	2.9197	4.9574	2.0433	29.1498	4.0976	26.4096	3.2731	7.2235	5.495	1.1503	2.8767	10.489	1.0455	22.8698	19.8119	72.3355
284379	LOC284379	non-coding	0	0.396	0	0	3.3708	9.7313	0.6733	0	0.4697	0	0.551	0	10.4923	0	0	0	0	0	1.7699	0	0	0	0	0	0.9152	0	0	0	0	0	0	0	0	10.6253	0	0	0	0	0	0	0.7669	0	5.553	0	18.091	1.1485	0
284424	MIR7-3HG	non-coding	0	0	0	0	0	0	0	0	0	0	0	0.5565	1.2107	0.4308	0	0.746	0	0	0	0.2734	0.2599	0	0	0.2854	0.6101	0	0	0	0	0	0	0	0	0	0	0	0	1.6365	0.4013	0	0	551.6	0.617	0	0	0	0
284440	LINC00663	non-coding	26.9953	25.3444	22.1656	37.1058	42.6966	51.7527	38.0407	19.3912	53.5476	78.6106	38.0165	15.025	48.4262	127.956	80.7491	36.9286	32.0537	23.0587	30.0885	43.4664	87.0808	126.086	52.1386	16.8403	9.7618	22.2401	42.2573	18.8	23.3996	19.279	16.1435	25.7908	27.2657	42.501	51.462	28.6833	29.7632	38.1859	21.8711	8.6351	7.6687	225.818	27.7649	12.5457	85.335	34.7427	30.7811
284441	LOC284441	non-coding	131.064	99.7937	202.593	156.215	93.2584	37.5981	256.522	121.116	92.534	54.8446	283.196	95.1586	156.981	107.707	101.513	118.619	59.262	148.525	125.664	125.478	98.5183	462.49	81.4861	82.2035	161.07	128.758	110.992	192.8	60.9272	71.4931	132.735	158.637	57.6297	113.609	118.399	130.401	167.68	142.379	80.4615	117.359	105.061	46.3862	42.5729	49.6602	84.9937	105.089	118.122
284551	LINC01226	non-coding	0.3912	0.792	1.7732	0.3711	20.2247	0	0	0.9537	0	3.6563	1.1019	0	0.8071	0.4308	0	0.373	0	1.0173	0	0.2734	0	0	0	0	0	0	0.5349	0	0	8.0329	0.4484	0	0.6197	0	0.7197	0	0	0.2728	0.8026	0	0	0	0	0	0	0.2871	0.3848
284573	LINC00303	non-coding	0.3912	1.188	0.8866	0	3.3708	0	0.3366	0	0	0	0	1.113	0	0	0	0.746	0.3727	0	0	1.0935	0	0.5265	0	0	1.2202	0	42.5247	0	0	1.2049	0.8969	0	1.2393	0	0	3.1335	0	0.2728	8.8287	0.3925	0	0	0	16.2049	46.4222	0.8614	0
284578	LOC284578	non-coding	21.9092	4.3561	1.3299	8.1633	15.7303	2.654	1.6832	2.2252	15.5006	10.9689	7.1625	2.2259	11.2994	56.4383	2.3071	7.4603	6.7089	7.1211	0.885	6.2876	4.1591	5.2645	4.0587	3.1397	5.186	16.6801	8.5584	7.6	3.532	3.6148	0.8969	0.9732	2.4787	6.13	6.1179	15.6674	6.7072	34.3674	9.832	6.6726	1.5337	2.5171	0	30.8416	0.6827	18.9505	86.187
284593	FAM41C	non-coding	9.3897	10.6922	8.4229	11.1317	16.8539	27.8669	41.4072	22.888	15.5006	7.3126	16.5289	14.4686	37.5303	6.4624	9.2285	19.3968	17.145	6.782	11.5044	12.5752	10.1378	31.5873	9.054	31.968	15.8629	11.7053	25.9428	5.6	23.3996	12.451	13.0045	12.1655	14.8722	91.132	11.1561	19.765	12.9952	10.6375	9.23	12.5601	6.9018	12.5854	11.106	26.6597	14.3363	9.7624	20.7772
284632	LOC284632	non-coding	2.3474	1.188	0	5.9369	13.4831	0.8847	1.0099	3.4968	0.4697	0	0.551	1.113	3.2284	0	1.1536	0.373	0.3727	0.3391	0.885	0.5467	1.5597	0	0	1.1417	0.3051	0.5853	0.2675	2.8	1.3245	0.4016	1.3453	2.4331	19.2099	0.8173	0	3.6155	1.2576	3.0003	2.6085	1.1775	0	0	0.617	0	1.024	0.5743	0.3848
284661	LOC284661	non-coding	0	0	0	0	8.9888	0	0	0	0	0	0	0	0	0	0	0	0	0	0	0	0	0	0	0	0	0	0	0.4	0	0	0	0	0	0.4087	0	0	0	1.9093	0	0.3925	0	0	0	0	1.3654	0	0
284688	LINC01142	non-coding	0	0	0	2.2263	14.6067	0	0	0	0	0	0	0	0	0.8617	0	0	0	0.6782	0.885	0	0	0.5265	0.3122	0	0.9152	0	0.2675	0	0	0	0	0	0	0	1.4395	0	2.9344	0.8183	0	0	1.1503	0	0	0.5227	0	0	0
284729	ESPNP	non-coding	0	0	0	1.1132	4.4944	0	0.3366	0.3179	1.4091	3.6563	0	2.2259	3.632	0.4308	0	0	1.4909	0.3391	5.3097	0	0	1.8426	0.6244	1.4271	3.3556	0.2926	47.8738	3.2	0.4415	6.0247	0.4484	0	0	6.9473	1.0796	0.9641	0.4192	8.1827	3.4111	2.355	0.3834	1.0787	8.021	4.1819	7.8508	4.0198	7.6953
284739	LINC00176	non-coding	6.651	10.2962	51.4241	23.3766	64.0449	14.5969	10.436	17.166	16.9098	25.5941	17.6309	184.752	23.0024	10.7707	4.6142	22.754	15.2814	8.1384	15.0442	21.8699	14.5568	68.4391	11.8639	35.1077	23.4893	3.5116	157.261	16	63.1347	140.576	13.9013	21.4112	60.1084	31.4671	8.9969	61.9464	12.1568	87.8277	134.838	6.2801	9.2025	44.5883	354.157	19.8641	43.0088	14.3565	41.1697
284749	LINC00494	non-coding	1.5649	3.1681	18.6191	3.7106	21.3483	4.4233	5.3863	4.4504	10.3337	31.0786	41.8733	3.8954	6.0533	5.1699	1.1536	1.8651	3.3545	10.1729	7.0796	10.6616	1.2997	17.6362	0.3122	0.2854	15.8629	3.219	25.4079	13.2	4.8565	6.4263	6.278	1.4599	4.3377	0.8173	8.9969	4.3387	2.096	9.001	1.0033	4.3175	0	25.89	151.782	11.5003	3.0721	19.8119	13.4667
284788	LOC284788	non-coding	0	0	0	0.3711	6.7416	0	0	0	0	0	0	0	0	0	0	0	0	0	0	0	0	0	0	0	0	0	0	0	0	0	1.7937	0	0	0	0	0	0	0	0.2007	0	1.5337	0	0	0	0	0.2871	0
284798	LOC284798	non-coding	0	0.792	0	0	20.2247	1.7693	0.6733	2.5431	1.8789	1.8282	0	2.2259	2.0178	2.1541	6.9214	0.373	0	3.391	2.6549	0.2734	12.4773	3.9484	0.9366	0.2854	0	0.8779	14.4424	0	0.883	0.8033	0	0	0	6.9473	0.3599	0.241	0.8384	9.8192	5.0163	14.5226	0.3834	0	0	1.0455	0	1.4356	0.7695
284800	FAM182A	non-coding	3.9124	0.396	0.4433	0.3711	22.4719	37.1558	0	1.5894	2.3486	5.4845	0.551	1.6694	2.4213	0.8617	0	3.3571	0.3727	0.3391	0	0.8201	0	0.2632	14.3615	2.5689	0.3051	2.0484	8.291	0.8	0	0	0.4484	0	4.3377	82.9587	1.0796	0.9641	0.8384	1.9093	13.845	0.3925	0	10.0683	0	2.091	0.6827	0.2871	6.1562
284802	FRG1BP	non-coding	232.394	196.419	273.08	219.295	121.348	88.9085	294.563	77.2471	201.978	288.848	280.441	141.347	424.132	201.196	253.783	286.476	167.723	235.673	216.814	220.066	324.409	216.373	95.2232	106.465	190.355	57.6487	339.93	220.8	172.627	59.4437	284.305	168.37	202.634	580.711	246.874	272.612	223.852	481.143	259.644	104.406	136.887	385.473	289.372	341.349	310.278	250.664	158.523
284835	LINC00323	non-coding	0.3912	0.396	0	0.7421	19.1011	4.4233	0.3366	0	1.4091	1.8282	1.6529	1.113	1.6142	1.7233	0	1.4921	23.1085	0.3391	0.885	1.9136	0.2599	10.5291	0.3122	0	0.9152	0.8779	24.0706	0	0	28.9186	0	0	0	2.452	3.2389	3.1335	2.096	0.8183	0.8026	0.3925	0.7669	0.7192	1.851	3.6592	0.6827	4.8812	1.5391
284836	LINC00319	non-coding	43.036	7.9201	3.5465	10.7607	87.6404	27.8669	2.0199	0.9537	31.0012	9.1408	31.405	28.9371	32.6877	14.6481	8.0749	15.2936	19.3813	22.3805	23.8938	17.7693	29.8934	3.9484	81.1739	30.8263	2.4405	14.6316	51.0832	24.8	9.713	356.662	144.843	52.5547	57.6297	272.17	2.879	36.3965	17.6064	67.0982	50.9656	15.7001	1.5337	0.7192	47.5089	0	61.0999	19.2377	10.0038
284837	AATBC	non-coding	100.548	38.0166	70.9298	60.8534	342.697	202.145	31.3079	22.2522	48.3807	21.9378	262.81	7.2343	69.0073	58.5924	24.2247	79.8254	56.2803	87.4873	102.655	57.6818	47.8295	41.5899	136.435	123.02	113.176	68.1835	194.17	212	52.5386	23.2955	106.727	108.029	182.804	928.893	92.1278	190.178	16.768	31.0943	320.642	29.4377	13.4202	0.3596	11.723	9.4093	2.7307	58.2873	103.117
284900	TTC28-AS1	non-coding	156.354	148.693	186.599	146.044	276.562	111.091	138.061	108.575	198.244	153.4	185.284	153.823	201.299	101.287	133.813	233.616	71.5729	156.724	253.203	145.495	559.558	223.922	201.555	198.718	83.6251	179.855	314.723	168.852	298.313	80.1325	242.857	277.119	119.244	395.186	167.043	245.375	154.24	319.518	174.642	104.857	126.392	320.011	310.196	274.396	270.034	136.229	168.296
284942	RPL23AP82	non-coding	208.138	147.105	64.7235	147.458	201.124	194.612	120.606	167.845	107.565	78.6106	187.328	117.418	77.4818	117.616	96.8989	204.92	198.099	117.721	126.549	112.356	122.061	240.129	183.706	214.817	79.6197	145.881	68.2001	100.8	131.859	122.546	38.565	93.9173	73.1216	82.1414	226.933	170.936	274.156	76.0991	100.727	175.174	90.1074	148.508	281.968	356.508	173.742	144.01	177.376
285033	STARD7-AS1	non-coding	60.6025	57.5635	54.6692	56.5195	50.7191	25.7304	37.9027	24.9638	43.2326	29.3601	43.6143	24.6188	79.3866	37.9472	43.27	44.4001	36.5971	34.8254	100.814	43.48	63.9303	65.7068	56.419	39.9886	40.9508	63.715	45.5576	38.676	56.7417	13.0174	79.3946	97.2457	48.1797	78.4839	46.1107	25.3956	110.815	59.9192	43.1322	39.6624	19.8044	38.7091	16.2949	167.193	63.0045	38.4811	31.6237
285045	LINC00486	non-coding	0	0.396	0	0	13.4831	0	2.0199	0	0	0	0.551	0	0.4036	0	0	0	0	0.3391	0	0	0	0	0	0.2854	0	2.0484	0.8024	0	0	0	0	0.4866	1.2393	0	0	0.4821	0	0	0	2.355	0	0	0	0	0	0.2871	0
285074	LOC285074	non-coding	186.228	383.731	164.469	290.167	141.573	137.123	233.294	369.387	138.566	212.066	234.711	272.12	253.834	240.832	546.787	165.619	175.923	261.106	244.248	173.319	346.504	284.812	257.571	300.271	155.884	207.184	167.959	154.8	382.34	177.929	382.511	310.949	219.365	472.007	198.291	425.188	314.399	270.575	213.695	376.803	163.344	182.668	817.523	453.215	1095.36	195.535	286.264
285154	CYP1B1-AS1	non-coding	1.9562	1.584	1.3299	13.7291	14.6067	7.0773	4.713	0.3179	17.3795	14.6252	3.3058	1.6694	23.8095	12.0631	2.3071	4.4762	1.4909	6.782	1.7699	1.9136	0.7798	6.8439	0.9366	3.4251	8.2365	1.1705	1.3373	2	5.298	0.4016	1.7937	0	2.4787	4.0866	5.758	0.9641	5.0304	1.9093	2.2072	1.57	3.8344	2.5171	0	1.5682	3.7547	7.4654	1.1543
285189	PLGLA	non-coding	0	0	0	0	0	0	0	0	0	0	0	0	0	0	0	0	0	0	0	0	0	0	0	0	0	0	0	0	0	0	0	0	1.2393	0	0	0	0	0	0	0	0	0	0	0	0	0	0
285194	TUSC7	non-coding	0	0.792	0	0	13.4831	0	0	0.3179	0	0	0	0	0	0	1.1536	0	0	0	110.62	0.5467	0	0	0	0	0	14.6316	0	0	0.4415	0	0	0	0.6197	0	0	1.6873	1.2576	0	0	0	0	0	0	0	0	0	16.5448
285205	LINC00636	non-coding	1.5649	0.396	0	0	3.3708	0	0.6733	0	0	0	0	1.6694	0.8071	0.4308	2.3071	0.746	0.3727	1.6955	3.5398	0.2734	0	0.7897	0.3122	0	1.2202	0	0.5349	0	0	1.2049	0.8969	0	0	0	0	0.241	0.4192	5.4551	0.4013	0.3925	0.3834	6.1129	2.468	3.6592	1.3654	0.8614	0
285359	PDCL3P4	non-coding	68.4664	55.0449	80.6827	48.9796	58.427	43.7908	25.9216	47.3655	69.0482	113.346	34.7107	105.732	46.4084	29.727	72.6742	104.817	67.4618	48.491	126.549	53.0344	65.2456	58.4364	57.7584	75.0678	70.163	80.7667	109.655	65.6	121.854	114.469	100.897	135.28	118.358	113.609	40.3059	38.5658	24.3136	55.6424	113.168	31.7928	68.2515	87.0191	71.5718	44.9556	70.316	51.6833	25.3944
285370	LINC00606	non-coding	0	0	0	0	11.236	0	0	0	0	0	0	0	0	0	0	0	0	0	0	0	0	0	0	0	0	0	0	0	0	0	0	0	0	0	0	0	0	0	8.8287	0	0	0	0.617	0	0	0	0
285375	LINC00620	non-coding	0	0.396	0	0	0	0	0.3366	0	0	0	0	0	0	0	0	0.746	0	0	0	0	0	0	0	0	0	0	1.3373	0	0	0.8033	0	0	0	0	0	0	0	0	0	0	0	0	0	0	0	0	0
285401	LINC00698	non-coding	0.3912	1.188	1.3299	0.3711	15.7303	0.8847	0.3366	0.3179	0.4697	3.6563	0	0	0	0	0	0.373	0	0	0	0.2734	0	0	0.3122	0	0.3051	0	0	0.4	0	0	0	0	1.2393	0	0.3599	0.9641	0	0	0	0	0	1.0787	0	0	0	0	0.7695
285419	LINC01091	non-coding	2.3474	0	0.8866	1.1132	64.0449	3.981	6.7329	1.5894	2.3486	3.6563	0.551	0.5565	2.0178	3.4466	2.3071	8.5794	6.3362	4.0692	1.7699	0.2734	1.5597	9.7394	0.6244	1.4271	1.2202	1.4632	1.8722	0	0.883	1.6066	0.4484	0.9732	1.2393	0.8173	3.2389	1.9283	2.9344	1.6365	0.8026	1.9625	2.684	89.8957	11.106	7.3183	3.0721	1.7228	3.0781
285456	RPL34-AS1	non-coding	0.7825	0.792	0.4433	1.1132	24.7191	1.327	1.0099	0.3179	1.4091	1.8282	0.551	0.5565	0.4036	4.3083	0	0.373	0	1.3564	0.885	0	0.7798	3.1587	0	0	0.9152	0	4.2792	0	0.4415	0.4016	1.3453	0.4866	0	0.4087	2.1592	0.7231	0	0.8183	0	0.785	0	4.6746	1.234	0	3.4134	0.8614	0
285501	LINC01098	non-coding	0	0	0.4433	0	2.2472	0	0.3366	0	0	0	0.551	0	0	0	0	0	0.3727	0.6782	0	0.2734	0	0.2632	0	0	0	0	0	0	0	0	0	0	0	0.4087	0	4.0976	0	0.5455	0.4013	0	0.3834	0	0	1.5682	0	0	0.3848
285512	FAM13A-AS1	non-coding	12.3044	14.8304	38.4351	53.5176	52.9213	7.5152	4.0835	19.1655	50.5931	56.6728	31.5868	8.3194	93.9306	35.4786	23.2442	30.3448	11.7928	29.8847	15.1327	10.4675	24.7674	48.2574	21.1239	10.1584	8.2518	5.6068	33.5892	28.964	73.9249	35.9956	315.991	15.09	29.1805	39.4115	22.4993	31.9205	11.7082	10.613	14.461	112.746	22.5575	114.915	47.6446	25.0915	6.4104	50.2362	11.5544
285548	LINC01096	non-coding	7.4335	2.772	3.9898	2.9685	51.6854	14.5969	6.7329	3.4968	11.2732	1.8282	3.3058	10.5732	10.8959	0	1.1536	1.8651	5.218	2.7128	23.0088	1.6402	20.2755	169.518	7.8052	3.1397	16.168	19.6064	0.5349	0.4	4.8565	0.4016	1.7937	11.6788	18.5902	15.1206	6.8376	18.8008	11.3184	76.0991	58.3898	3.14	0.7669	0	0.617	0.5227	0	14.0693	19.6229
285593	LOC285593	non-coding	0	0.396	5.3197	2.9685	20.2247	0	5.0497	0.3179	0.9394	5.4845	3.8567	2.7824	6.4568	2.1541	0	1.4921	0.3727	2.0346	1.7699	1.6402	1.2997	2.369	2.1855	1.1417	2.1354	0.8779	2.1396	1.6	1.3245	2.0082	5.3812	0	6.1967	7.3559	1.0796	2.6514	1.6768	4.6369	3.8124	2.7475	0.3834	2.8767	3.702	0	3.0721	3.1584	0
285622	NBPF22P	non-coding	0	0	0	0	10.1124	1.327	0	0.3179	0.4697	0	0	0	0.8071	0	0	0	0.3727	0	0	0	0	0.2632	0	0	0	0	0	0	0	0	0	0	0	1.6347	0	0	0	0.2728	0	3.925	0	1.0787	0	0	0	0.2871	0
285627	LOC285627	non-coding	0	0	0	0	6.7416	0	0	0	0	0	0	0	0	0	0	0	0	0	0	0	0	0	0	0	0	0	0	0	0	0	0	0	0	0	0	0	0	0	0	0	0	0	0	0	0	0	0
285629	LOC285629	non-coding	16.4319	23.7604	25.7121	11.8738	23.5955	26.0975	1.6832	9.8546	2.8183	0	12.6722	2.2259	22.1953	8.1857	12.6891	27.2301	2.2363	5.7647	7.9646	9.2947	10.1378	5.5278	41.5236	13.7006	6.1011	50.9181	52.6879	667.2	11.479	39.763	8.0717	25.7908	89.2332	16.7552	12.5956	6.0259	2.9344	10.3648	1.8059	7.0651	3.4509	0	0.617	24.046	1.7067	229.991	14.2362
285692	LOC285692	non-coding	0	0	0	0	2.2472	0	0	0	0	0	0	0	0	0	0	0	0	0	0	0	0	0	0	0	0	0	0	0	0	0	0	0.4866	0	0	0	0	0	0	0	0	0	0	0	0	0.3413	0	0
285696	LOC285696	non-coding	0.7825	1.188	2.6599	0.7421	19.1011	1.7693	10.7726	0	1.8789	1.8282	2.7548	2.7824	0	1.2925	1.1536	1.119	1.1182	0.6782	1.7699	0.5467	4.9389	2.8955	19.6691	15.1277	1.2202	1.1705	6.4188	0.8	0.4415	2.0082	15.6951	0	1.2393	0	5.0382	0.241	0.8384	0.5455	0.2007	1.57	1.5337	1.0787	6.17	1.5682	5.1201	16.9406	2.3086
285735	LINC00326	non-coding	0	0	0.8866	0	16.8539	26.9822	1.3466	0.6358	0.4697	23.766	0.551	1.113	0	5.6007	0	17.1587	2.2363	0	0	0	0.7798	7.1071	0	0	2.4405	5.2674	0	0	0.4415	0	0.8969	0	0	0	11.516	1.4462	1.2576	0.2728	0	0.3925	106.212	0.7192	1.234	0	0.6827	0.2871	0.7695
285740	PHACTR2-AS1	non-coding	0	0	0.8866	0	22.4719	0	0	0	0	0	0.551	0.5565	0.8071	0.4308	0	0	0	0.6782	0	0	0	0	0	0	0.3051	0	1.8722	0	0	0	0	0	0	0.4087	0	0.4821	0	0.2728	0.2007	0	0	0.3596	0.617	0	0	0	0
285759	FLJ34503	non-coding	1.1737	0.396	4.8764	2.5974	7.8652	0	0	0	1.8789	0	0.551	0	5.6497	2.585	0	0.373	0.7454	1.0173	0	0.2734	0.7798	0.5265	0.6244	0.2854	0	0.2926	2.1396	2	0	0	0.4484	0	0	2.0433	1.0796	0.241	1.2576	16.0927	0.2007	2.355	0.3834	3.5958	0	2.6137	0	0.5743	0
285768	LINC01622	non-coding	8.9984	3.1681	0	1.1132	11.236	1.7693	1.3466	0.3179	1.8789	0	8.7713	0.5565	2.8249	0.8617	1.1536	1.8651	2.609	0.3391	2.6549	1.3669	1.5597	1.3161	13.4155	0.2854	1.5253	4.6821	1.8722	1.2	0.883	0.4016	4.4843	1.4599	3.718	10.6253	1.4395	13.4667	1.6768	1.2465	2.6085	0.785	0.3834	0.3596	20.3609	3.1364	25.1977	0.2871	1.5391
285780	LY86-AS1	non-coding	0.7825	0	0	2.2263	25.8427	0	0	0.3179	0	0	1.1019	0	0	0.4308	0	0.746	0	0	0	0.5467	0	0.2632	0	0	0.3051	0	0.5349	0	0	0	0	0	0	0	1.0796	0.4821	0	0	0	0	0.3834	1.0787	1.851	0	0	1.4356	0.7695
285796	PACRG-AS1	non-coding	0.3912	0.792	0	0	5.618	0	0.3366	0.3179	0	1.8282	0	0	0.8071	0	0	0.746	0	0.3391	0	0.2734	1.2997	0	0.9366	0	2.4405	0	0	0	0.883	0.4016	0	0	0.6197	5.3126	0.7197	0	0	1.9093	0.8026	0	0	0.3596	0	0	7.1681	0	1.5391
285830	HLA-F-AS1	non-coding	20.1526	32.5082	37.3756	36.8646	32.7753	13.9688	34.3074	11.4345	22.0015	51.2249	29.124	13.2888	45.6255	122.768	24.0978	14.9915	77.6817	45.9647	12.0796	41.006	6.5454	24.796	42.532	26.4221	29.4501	7.6114	5.6459	5.892	20.0044	45.2977	17.4933	19.9465	25.0782	13.7965	29.0454	26.003	40.6581	13.3405	11.8485	41.15	58.1787	9.9856	38.9264	38.0972	18.9717	41.183	42.197
285834	HCG22	non-coding	1.1737	0	0	1.8553	51.6854	0.8847	0.3366	2.5431	0.4697	1.8282	5.5096	1.113	2.0178	3.0158	1.1536	0.373	0	0.3391	0.885	0.2734	0.5199	1.0529	0	0	5.186	0.5853	3.4769	2.8	0	0	0.4484	0	0	0.4087	0	123.652	0.8384	1.091	49.7617	6.2801	2.3006	0	0	0	2.048	1.7228	1.9238
285847	LOC285847	non-coding	0	0	0.8866	0.3711	0	0	0	0	0.4697	0	0	0	0.8071	1.2925	0	0.373	0	1.0173	0	0	0.5199	0	0	0	0.6101	0	0.2675	0.4	0.883	0	0	0.4866	0	0	0	0.4821	0.4192	1.091	0.4013	0.785	0.3834	0.7192	0.617	0	2.048	0.2871	0.7695
285905	INTS4P1	non-coding	10.1721	16.2363	28.8152	15.5844	22.4719	5.308	36.6942	11.444	12.2126	16.4534	17.0799	12.7991	11.2994	6.4624	29.9925	13.0555	5.218	19.6677	11.5044	12.3018	8.8381	11.8452	25.601	11.988	22.8792	38.6276	90.3985	24	13.245	19.279	22.87	4.3796	5.5771	12.6686	21.9523	70.3826	9.6416	41.459	23.8776	18.4476	18.4049	56.8141	8.021	14.6367	37.5474	9.7624	18.8534
285908	LINC00174	non-coding	75.1174	106.13	151.169	375.51	126.966	60.157	60.5959	517.206	355.575	243.144	231.405	77.3511	229.217	149.066	117.663	316.69	35.4081	77.3143	148.673	94.0405	110.736	161.885	105.214	180.962	161.375	47.9918	366.141	106	215.452	102.018	399.552	101.216	348.877	169.595	88.1691	170.413	57.8495	175.11	169.15	160.926	41.411	127.292	62.9338	93.5703	147.118	110.545	62.7164
285954	INHBA-AS1	non-coding	0.7825	1.188	1.7732	1.8553	32.5843	1.7693	1.6832	0.3179	0.4697	1.8282	1.6529	0.5565	2.8249	1.2925	0	1.8651	1.8636	2.0346	0.885	1.0935	0.5199	1.8426	2.1855	0.5709	3.6607	0.2926	4.5467	0.8	0	0	0.8969	0	0	1.6347	2.879	0.4821	2.096	1.3638	0.4013	3.925	2.3006	217.548	2.468	1.0455	67.9267	3.1584	3.0781
285958	SNHG15	non-coding	482.394	452.24	332.927	500.928	656.18	847.064	472.648	1034.41	421.805	376.6	371.901	880.356	606.538	878.024	1343.9	286.103	988.818	414.039	669.027	355.112	503.307	287.707	1092.1	536.321	299.26	434.853	240.706	352.4	1268.43	1001.31	438.565	1012.65	480.868	268.492	259.829	687.677	414.588	471.324	468.924	784.614	1173.31	585.074	1332.23	1132.25	382.642	500.467	526.356
285961	SEPT7P9	non-coding	0	0	0	0	0	0.4423	0	0	0	0	0.551	0	1.6142	2.1541	1.1536	1.8651	1.1182	0.3391	0.885	0.5467	0.7798	0.7897	0.9366	0.2854	0	0	0.8024	1.2	1.3245	1.6066	0.8969	0.4866	1.2393	0.4087	0.3599	0.7231	0.8384	1.091	0.4013	0	0.3834	1.4383	0.617	0.5227	1.3654	0.2871	0.3848
285962	WEE2-AS1	non-coding	27.7778	19.4043	17.2891	13.7291	38.2022	24.7705	16.4955	4.1326	23.0161	42.0475	31.405	8.9037	10.0888	22.8338	10.382	29.4533	87.9612	18.6097	17.6991	24.3302	31.9626	14.2143	25.9132	9.6789	21.659	21.0696	114.469	3.6	10.1545	19.271	12.3543	15.5718	12.3935	35.1451	25.1912	31.3347	18.864	130.321	43.9689	13.7376	8.819	111.086	10.489	104.025	40.6195	25.833	19.6229
285987	DLX6-AS1	non-coding	57.5117	34.4526	70.9298	24.1187	43.8202	3.0963	51.8431	33.3784	13.6218	0	3.3058	29.4936	9.2817	0	143.041	48.8651	9.6906	27.806	16.8142	41.8261	169.743	39.4841	31.5329	29.6846	13.1174	44.7728	0.2675	42	96.2472	18.8774	24.6637	22.3844	62.5871	61.7082	37.4269	3.6155	18.0256	614.521	12.2398	9.0276	0	5.3937	4.319	0	42.3262	9.1881	33.0896
286002	SLC26A4-AS1	non-coding	3.9124	0.396	7.093	4.0816	49.4382	11.5006	1.0099	45.4582	2.3486	40.9689	24.7934	5.9321	16.3156	53.0907	2.3071	20.6725	1.8636	21.3632	0.885	1.0935	1.0398	10.7923	0	1.4271	0.6101	5.5717	0.8024	2.8	5.298	46.591	0	1.9465	4.9574	0.8173	2.1592	0.4821	6.7072	14.1834	4.4143	7.8501	3.0675	49.982	0	0	1.3654	10.6238	23.0858
286016	TPI1P2	non-coding	41.0798	28.5125	23.9388	77.9221	50.5618	15.4816	26.9315	16.8481	29.5921	20.1097	29.7521	85.1419	30.6699	9.0474	83.0562	54.4603	23.1085	40.3527	115.044	33.3516	67.8451	73.7036	20.2935	73.0698	39.0472	65.2572	89.8636	22.8	43.2671	16.8692	67.2646	47.2019	35.3215	48.2223	28.7899	25.5499	43.5967	73.6443	34.1109	3.925	20.3221	22.6537	3.702	20.3868	56.3211	17.802	41.1697
286042	FAM86B3P	non-coding	7.0423	5.9401	4.4331	5.9369	10.1124	5.7503	3.0298	10.4903	14.0915	3.6563	11.5702	5.5648	17.3527	12.494	11.5356	4.8492	8.5725	9.4947	5.3097	10.1148	4.419	2.369	17.7958	3.4251	9.7618	8.779	22.4659	3.2	17.2185	39.763	22.4215	21.8978	11.7738	3.2693	8.9969	12.7749	11.3184	11.7285	9.6313	12.9526	11.5031	12.2258	4.319	12.023	14.3363	9.1881	8.4648
286076	BREA2	non-coding	1.5649	0.792	3.1032	5.9369	7.8652	3.981	0.6733	5.4041	5.6366	1.8282	6.6116	11.1297	13.7207	3.4466	1.1536	1.4921	0.7454	4.4083	4.4248	2.7337	3.8991	1.3161	2.1855	2.8543	2.7455	1.4632	10.1631	2.4	4.8565	16.4675	3.5874	4.3796	8.0558	7.7646	0.7197	6.2669	0	5.4551	5.0163	4.71	0.7669	7.9108	4.319	0.5227	1.7067	3.7327	2.6933
286094	LINC01591	non-coding	0	0	0	0	1.1236	0	0	0	0	0	0	0	0	0	0	0	0	0	0	0	0	0	0	0	0	0	0	0	0	0	0	0	0	0.4087	0	0	0.4192	0	0	0	0	0.7192	0	0	0	0	0
286101	ZNF252P	non-coding	633.02	562.33	595.811	429.313	705.618	452.947	611.682	264.802	583.857	413.163	684.848	305.509	691.283	535.948	355.296	315.571	461.424	519.837	665.487	601.148	743.177	707.291	798.938	537.177	713.832	561.563	730.142	336.8	461.81	765.94	665.919	296.35	557.087	322.436	512.101	1479.48	589.813	683.801	520.893	318.713	298.696	642.575	271.479	359.122	582.326	522.001	576.375
286102	TMED10P1	non-coding	72.77	60.193	58.9604	37.1058	77.5281	50.4257	44.1003	40.6898	35.6984	51.1883	88.7052	38.9538	59.322	46.5293	70.3671	33.1984	63.7346	54.5948	61.0619	39.3658	60.5667	73.7036	40.5869	50.8063	55.2152	47.6992	87.724	23.2	19.426	57.0338	36.7713	29.6837	21.6886	28.1978	70.1754	96.6556	64.5567	32.7308	34.5122	94.9858	78.2209	53.9374	49.9769	82.07	55.9798	56.5645	65.025
286103	ZNF252P-AS1	non-coding	5.8685	1.98	5.763	8.5343	25.8427	3.0963	5.3863	3.1789	6.1063	7.3126	8.8154	2.7824	7.6675	2.1541	9.2285	2.6111	4.4726	8.4774	14.1593	2.187	4.9389	6.8439	3.4343	4.8523	2.4405	1.7558	22.4659	3.2	10.596	8.4346	4.9327	5.3528	10.5345	9.3993	4.3185	6.9901	0.4192	12.0013	5.8189	2.7475	3.8344	23.3729	13.574	7.8411	14.3363	8.3268	10.0038
286135	FAM183CP	non-coding	0	0	0	0	11.236	0	0	0	0	0	0	0	0	0	0	0	0	0	0	0	0	0	0	0	0	0.2926	0	0	0	0	0	0	0	0	0	0	0	0	0	0	0	0	0	0	0	0	0
286140	RNF5P1	non-coding	168.232	106.922	104.178	76.4378	330.337	305.208	262.919	160.852	127.293	82.2669	143.802	177.518	101.291	97.7976	113.049	112.278	694.745	76.6361	143.363	114.817	143.488	62.9113	140.805	104.752	287.058	89.2531	268.788	110.8	150.11	6.4263	63.6771	115.815	108.443	180.221	112.641	72.552	166.422	131.469	275.495	122.853	142.255	173.679	412.155	496.079	414.046	107.961	122.355
286333	FAM225A	non-coding	3.5211	3.5641	8.8662	29.6846	8.9888	6.635	36.3575	3.4968	6.576	27.4223	11.5702	10.0167	11.703	31.8812	42.6817	12.3095	7.4543	23.7369	12.3894	30.8912	22.3551	21.3214	20.2935	33.1097	8.2365	1.7558	33.1639	11.2	18.543	10.4428	8.9686	4.3796	32.2231	1.226	20.5128	4.5797	5.8688	22.3661	11.4372	11.3826	2.3006	2.1575	17.276	8.3638	6.1441	26.703	22.701
286359	LOC286359	non-coding	0	0	0.4433	0	12.3596	0	0	0.6358	0	0	0	0	0	0	0	0	0	0	0	0	0	0	0	0	0	0	0.2675	0	0	0	0	0	0	0	0	0	0	0.2728	0	0	0	0	0.617	0	0.3413	0	0
286411	LINC00632	non-coding	0	0	0	8.1633	10.1124	0.4423	0	0	0	0	0	0.5565	0.4036	0	0	0	0	0.3391	2.6549	0	0.5199	0	0.9366	0	0	0	0	0	0	0	0	0	2.4787	0.8173	0	0	0	0.8183	0	0.785	0	0.3596	0	0	0	0	0.3848
286467	FIRRE	non-coding	11.3459	11.4842	46.991	3.7106	53.9326	15.9239	16.1589	17.166	50.2596	7.3126	94.2149	1.6694	12.1065	1.2925	91.1312	32.0793	70.4435	20.3459	22.1239	42.0995	90.4601	7.8968	4.0587	15.6986	1.8303	27.2149	5.8839	72	71.0817	6.828	45.7399	82.2384	89.8528	35.9624	12.2357	90.1476	15.0912	84.5546	26.2854	39.2503	33.3589	0.3596	9.872	95.6613	0.3413	21.8218	70.7965
286554	BCORP1	non-coding	0.7825	3.5641	1.7732	0	5.618	0	15.4856	0.6358	4.6972	32.9068	11.0193	0	4.8426	0	0	0	39.8807	3.7301	0	4.374	44.1903	0.7897	0.6244	0	3.0506	0.2926	0	2.4	0	4.4181	0	1.9465	0	0	3.5987	1.2052	5.4496	0	0	2.355	3.8344	0	22.2119	4.1819	0	4.8812	0
286557	RBMY1A3P	non-coding	0	0	0	0	0	0	0	0	0	0	0	0	0	0	0	0	0	0	0	0	0	0	0	0	0	0	0	0	0	0	0.8969	0	0	0	0	0.241	0	0	0	0	0	0	3.085	2.6137	0	0	0
286828	CSN1S2AP	non-coding	0	0	0	0	0	0	0	0	0	0	0	0	0	0	0	0	0	0	0	0	0	0	0	0	0	0	0	0	0	0	0	0	0	0	0	0	0	0	0	0	0	0	0	0	0	0	0
286967	FAM223B	non-coding	1.5649	6.3361	7.9796	8.9054	14.6067	1.327	4.3764	4.4504	8.4549	1.8282	5.5096	1.113	5.2462	8.1857	8.0749	7.0873	2.2363	1.6955	8.8496	5.4675	21.0554	3.6852	4.6831	5.4231	1.2202	2.0484	4.0118	2.8	28.2561	6.0247	14.7982	13.6253	13.6328	14.3032	2.5191	1.9283	1.2576	4.9096	2.8091	2.355	2.684	2.1575	0	2.091	4.0961	4.8812	3.4629
317648	NOP14-AS1	non-coding	299.116	279.85	169.912	183.44	357.191	497.653	191.594	367.791	406.769	249.36	290.782	296.144	330.658	244.455	321.093	233.706	193.31	182.252	406.15	201.107	279.558	1129.77	451.467	247.806	220.717	332.346	193.498	135.064	515.439	250.503	430.085	332.521	145.475	282.211	416.147	294.272	305.19	206.777	258.55	316.515	327.281	527.727	125.911	163.471	166.762	182.95	197.584
317716	BPIFA4P	non-coding	0	0	0	0	0	0	0	0	0	0	0	0	0	0	0	0	0	0	0	0	0	0	0	0	0	0	0	0	1.3245	18.8774	0	0	0	0	0	0	0	0	0	0	0	2.5171	0	0	0	0	0
317751	MESTIT1	non-coding	0.7825	0	0	1.1132	24.7191	0.4423	20.8719	0.3179	0.9394	1.8282	0	0	1.2107	2.585	0	0.373	1.1182	1.3564	0	0.2734	1.0398	0.5265	0	0.2854	0.3051	0	2.1396	0	0.4415	0.8033	0	0	0	0.4087	0.3599	6.0259	0.4192	106.921	0.8026	0.3925	0	0.7192	0.617	0.5227	5.1201	0.5743	1.1543
319085	ITPK1-AS1	non-coding	0	0	0	0	39.3258	0	0	0.3179	0	1.8282	1.6529	0	0.8071	0.4308	0	0.746	0	0.3391	0	0	0	0	0	0	0.3051	0	0.2675	0.4	0	0	0.4484	0.4866	0.6197	0.4087	0	0	0	0.5455	0.2007	1.57	0.7669	0.3596	0	0	0	0.5743	0
319103	SNORD8	non-coding	0	0	0	0	0	0	0	0	0	0	0	0	0	0	0	0	0	0	0	0	0	0	0	0	0	0	0	0	0	0	0	0	0	0	0	0	0	0	0	0	0	0	0	0	0	0	0
319139	SNORD56B	non-coding	0	0	0	0	0	0	0	0	0	0	0	0	0	0	0	0	0	0	0	0	0	0	0	0	0	0	0	0	0	0	0	0	0	0	0	0	0	0	0	0	0	0	0	0	0	0	0
326342	ADGRE4P	non-coding	5.8685	1.98	11.9694	168.46	4.4944	1.327	2.0199	4.1326	14.5612	20.1097	8.8154	5.5648	55.6901	28.0037	17.3034	21.2619	6.7089	56.2903	18.5841	9.2947	3.1193	3.9484	2.8099	4.2814	4.5758	3.219	2.1396	2	2.2075	0.4016	2.6906	2.9197	1.859	1.226	20.5128	3.6155	7.1264	1.091	0.602	7.8501	42.1779	1.4383	6.787	0	9.5575	13.208	2.6933
326343	MT1DP	non-coding	0	0.792	4.4331	0	3.3708	2.2117	0	0	0	1.8282	0.551	20.0334	1.2107	0.4308	2.3071	0.746	1.8636	1.0173	0	3.2805	1.2997	1.0529	0.9366	0.8563	2.7455	1.4632	66.8628	0.8	1.766	1.6066	4.4843	0.4866	1.2393	0.8173	1.4395	0	3.7728	1.3638	0	2.7475	2.684	50.3416	9.255	21.4323	71.6814	2.5842	0.3848
337875	HIST2H2BA	non-coding	3.1299	4.3561	5.763	6.308	2.2472	15.0393	6.3962	13.3513	9.3943	1.8282	9.3664	1.6694	6.8604	9.4782	24.2247	8.2063	27.2083	15.9376	16.8142	6.561	7.0185	30.5344	5.3075	6.5649	4.5758	16.3874	17.9192	8.4	5.298	14.4593	19.2825	8.2725	1.2393	24.1112	5.758	5.7849	10.0608	27.8212	8.628	7.8501	40.6442	45.3074	12.34	25.6142	14.6776	13.4951	16.9296
338069	ST7-OT4	non-coding	0	1.584	0.9132	0.7495	3.3708	0.4423	0.6733	0	0.4744	3.6563	0	0.5565	0	3.4466	4.6142	0.373	1.1182	0	0	1.0935	2.3395	2.906	0.9491	1.998	0.9152	0.2956	0.5403	0.4	1.3245	2.8115	0.9148	1.9805	1.859	0.4087	0	1.2124	2.5529	0.8183	0.2047	0.785	0.7669	1.4419	0	1.0768	0.6895	1.4356	0.7772
338429	SNORD109B	non-coding	0	0	0	0	0	0	0	0	0	0	0	0	0	0	0	0	0	0	0	0	0	0	0	0	0	0	0	0	0	0	0	0	0	0	0	0	0	0	0	0	0	0	0	0	0	0	0
338433	SNORD115-1	non-coding	0	0	0	0	0	0	0	0	0	0	0	0	0	0	0	0	0	0	0	0	0	0	0	0	0	0	0	0	0	0	0	0	0	0	0	0	0	0	0	0	0	0	0	0	0	0	0
338588	LINC00705	non-coding	0	0	0	0	4.4944	0	0	0	0.9394	0	0	0	0	0	0	0	0	0	0	0	0	0	0	0	0.3051	0	0	0.4	0.4415	0	0.8969	0.4866	0	0	0	0	0.4192	0	0	0	0	0	0	0	0	0	0.3848
338651	KRTAP5-AS1	non-coding	0.3912	6.3361	0.8866	4.7607	10.9663	1.327	1.3466	5.6648	6.6089	3.4918	7.5152	0.9905	6.8644	59.0232	0	1.7233	0.6373	20.3459	0.885	18.5894	0	3.4456	1.561	2.6488	2.6296	4.0969	73.7978	15.44	6.6225	9.0371	0.8969	2.9538	25.9272	28.6065	3.0013	4.5797	0.9097	17.7374	3.2104	1.1775	0	78.3172	0	0	5.1201	3.1498	18.4686
338758	LINC00936	non-coding	23.0829	61.777	38.5681	190.724	40.4494	23.8859	18.852	53.7233	36.6378	31.0786	39.6694	26.7112	43.5835	24.1263	243.401	73.4841	22.363	72.9061	99.115	21.8699	186.899	52.6454	34.0306	63.6506	21.0489	55.3076	48.4087	44.4	109.492	65.4684	41.2556	71.0462	41.5182	82.5501	32.0288	68.6954	23.8944	65.1889	24.2789	15.3076	43.7117	162.891	31.4669	16.7277	11.2642	34.4555	171.989
338799	LINC01089	non-coding	104.069	76.8253	257.564	347.31	216.854	47.7718	46.1202	83.6049	227.812	261.426	235.262	122.983	250.202	123.647	136.12	89.1507	253.82	191.59	174.336	85.0191	248.505	78.1785	67.749	65.0778	71.9933	78.7183	622.091	142	580.574	130.937	269.507	223.844	297.444	424.602	125.956	157.156	110.669	337.946	196.639	170.739	50.6135	919.094	251.118	1740.2	358.066	204.436	215.083
339005	WHAMMP3	non-coding	9.3897	43.9567	77.5795	34.1373	34.8315	25.2129	112.776	9.2188	55.8962	47.532	58.4022	15.5815	99.2736	45.6676	49.603	18.6508	16.0268	43.4045	19.469	50.5741	23.1349	35.0092	39.0259	45.3832	46.0635	5.8527	43.3271	40	125.386	51.0091	173.991	4.8662	48.3346	46.9963	38.5065	100.994	46.9503	6.8189	67.0178	45.1379	59.0491	104.279	5.553	97.7522	30.3793	37.614	16.9296
339201	ASB16-AS1	non-coding	139.671	159.547	169.624	157.648	146.067	138.441	189.403	81.6975	178.966	160.786	198.898	135.153	144.875	104.083	207.618	209.184	140.101	106.985	240.619	177.898	202.495	82.1058	147.034	150.678	120.165	162.335	374.544	211.968	289.567	155.654	105.74	418.803	365.992	150.797	131.329	189.674	76.2775	169.349	129.18	43.9329	240.748	256.577	78.2971	143.231	201.305	181.11	154.313
339240	KRT17P5	non-coding	1.5649	0.792	0	0.7421	34.8315	0	1.0099	0	0.9394	0	0.551	5.5648	0.4036	0	8.0749	0.746	0	1.3564	1.7699	3.2805	0.5199	1.0529	2.1855	1.1417	0	0	0	1.6	10.596	1.2049	0	0.9732	0	0.8173	0	0.4821	0	1.091	1.4046	0	0.3834	0	0	0	0	0.5743	0
339290	LINC00667	non-coding	496.87	930.097	366.175	581.447	635.607	729.846	945.524	649.889	961.856	493.601	1069.97	617.696	815.868	531.64	551.401	747.523	754.886	553.069	630.088	475.793	1419.26	388.786	449.891	716.883	665.328	1095.62	613.442	433.6	920.971	613.716	1042.15	820.438	461.038	1414.79	667.207	955.847	504.297	1237.77	1227.29	322.638	379.218	1021.33	779.269	1131.73	906.941	686.11	1258.18
339483	MTMR9LP	non-coding	15.6495	51.8769	38.5681	119.109	112.36	24.3282	13.8024	39.7362	79.3819	184.643	118.457	33.9455	143.664	98.6593	34.6068	39.5397	172.941	42.3872	54.8673	59.322	13.517	31.324	26.2254	33.3952	24.4045	6.1453	202.995	29.2	28.6976	36.9515	24.6637	18.0049	16.1115	58.0302	75.2137	58.5719	79.6479	96.2831	81.8661	90.6682	94.7086	380.798	48.7429	251.96	106.498	86.1388	40.7849
339521	FAM58BP	non-coding	1.1737	0	0	2.2263	12.3596	1.327	3.7031	1.2716	0.9394	0	0.551	2.2259	1.2107	0.8617	1.1536	0.373	3.7272	0	1.7699	0.5467	1.5597	0.5265	0	1.7126	2.4405	2.0484	0	0.4	0	0.4016	0.8969	1.4599	5.5771	1.6347	1.0796	4.5797	2.096	0.5455	1.8059	1.9625	0.7669	0.7192	1.234	4.7047	0.3413	1.7228	1.5391
339524	LINC01140	non-coding	59.4679	39.9967	30.5885	75.3247	67.7753	64.138	38.3774	20.9807	71.8665	155.393	60.4353	57.98	97.046	112.51	70.3671	82.3656	101.752	88.9047	144.248	46.4735	26.561	56.7728	14.3615	75.8413	69.1288	40.0585	22.5729	22	22.9581	4.0165	8.713	8.7591	10.5345	86.6367	115.879	89.4269	149.654	379.072	85.2772	35.6471	32.9601	6.8321	23.4459	134.344	256.722	76.0893	97.7299
339535	LINC01139	non-coding	0.7825	16.2363	1.7732	40.8163	159.551	43.7908	64.9722	0.3179	23.0161	14.6252	379.614	97.3845	52.4617	5.1699	628.69	77.9603	0	114.276	47.7876	4.374	0.2599	0	0.3122	70.2155	119.887	88.0825	0.2675	0.8	0.4415	59.4437	1.3453	0.9732	0	559.052	44.6244	274.782	51.9807	212.75	98.5202	69.4731	5.3681	0.7192	61.0828	63.7742	1.7067	9.7624	140.439
339568	LOC339568	non-coding	0	0	0	0	5.618	0	0	0	0	0	0	0	0.4036	0	0	0	0	0	0	0	0	0	0	0	0	0	0	0	0	0	0	0	0	0	0	0	0	0.2728	0	0	0	0	0	0	0	0	0
339674	LINC00634	non-coding	5.4773	5.5441	3.1032	0.3711	15.7303	1.7693	17.5055	2.5431	7.5155	5.4845	8.8154	3.3389	3.2284	0.4308	5.7678	1.4921	15.2814	1.6955	9.7345	4.9207	9.098	13.951	7.1808	6.2794	4.8809	12.5832	26.7451	3.6	8.83	6.0247	20.6278	27.7372	9.2951	12.2599	2.1592	6.2669	8.384	5.4551	9.4306	1.9625	1.9172	0	0.617	12.5457	13.3123	6.0297	6.9257
339788	LINC00298	non-coding	0	0	0.4433	0	15.7303	0.4423	0	0	0	1.8282	0	0	1.2107	0	0	0	0	0	0	0.2734	0.2599	0	0	0	0.3051	0	0	0	0	0	0	0	0	1.6347	0	0	0	0.8183	0	0	0	0	0.617	0	0	0	0
339942	H1FX-AS1	non-coding	4.6948	37.2246	36.3515	44.5269	32.5843	32.7325	25.2483	12.0798	39.9258	60.3291	41.3223	45.0751	55.6901	24.1263	14.9963	23.873	19.0086	9.8338	33.6283	12.3018	25.4744	12.1084	22.1667	12.2734	25.9298	10.8274	94.4103	88.8	39.2936	38.1564	36.7713	10.219	86.7545	173.273	21.2326	16.3905	58.6879	101.738	26.8874	12.5601	4.2178	51.0608	56.7638	167.799	23.2111	24.1189	36.9373
340017	LOC340017	non-coding	0	0	0.4433	0	14.6067	0	0	0	0.9394	0	0	0	0.4036	0	0	0.373	0	0.3391	0	0	0	0	0	0	0	0	0	0.8	0	0.4016	0	0	0	0	0.3599	0.4821	0	0.8183	0	0.3925	0	0	0	0	0	0	0
340074	LOC340074	non-coding	0	0	0	0	15.7303	0	1.0099	0	0	0	0	0	1.2107	0	0	2.2381	0	0.3391	0	0.2734	0	0	0.6244	0.2854	0.3051	0	0	0	0	0	0.4484	0.9732	0	0	0	1.6873	0	1.091	1.6052	0	0	0	0	0	0	0	0
340094	LINC01020	non-coding	0	0	0	0	5.618	0	0	0	0	0	0	0	0.4036	0	0	0	0	0	0	0	0	0	0	0	0	0	0	0	0	0	0	0	0	0	0	0	0	0	0	0	0	0	0	0	0	0	0
340198	IFITM4P	non-coding	0	0	0	0.3711	0	0.4423	0	0	0.9394	0	0	0	0	0.8617	0	0.746	0	0	0	0	0	0	0	0	0	0	0	0	0	0.4016	0.4484	0.4866	0	0	0	0.241	0	0.2728	0	0	1.1503	0	0	0	0.6827	0	0
340206	TREML3P	non-coding	3.5211	471.644	321.401	26.3451	12.3596	2.654	3.0298	4.7683	1.8789	3.6563	0.551	31.163	5.2462	4.3083	16.1498	188.373	8.1998	3.0519	4.4248	325.588	2.0795	15.5304	805.807	1188.53	0.3051	0.2926	0.2675	16	23.8411	833.417	378.475	2.9197	17.3509	0.4087	109.762	0.241	5.8688	1.091	1.0033	5.8875	21.8558	0	0	3.1364	2.7307	43.3565	1.5391
340286	FAM183BP	non-coding	0	0	0	2.5974	8.9888	0.8847	0	1.9073	3.288	9.1408	3.8567	0	6.8604	1.2925	2.3071	1.8651	0	4.7474	4.4248	0.5467	0.5199	3.422	0	0.5709	0.6101	1.1705	0.8024	0.8	1.3245	1.2049	0.4484	0	3.718	0.4087	0.3599	3.8566	0	1.3638	0.602	2.7475	1.9172	1.7979	0	0	1.7067	2.0099	0.7695
340357	LOC340357	non-coding	0	0	0	0	1.1236	0	0	0	0	0	0	0	0	0	0	0	0	0	0	0	0	0	0	0	0	0	0	0	0	0	0	0	0	1.6347	0	0	0	18.5475	7.0228	0	0	0	0	0	0	0	0
340508	GAS2L1P2	non-coding	0	0	0	0.3711	8.9888	0.4423	0.3366	0.6358	0	1.8282	0	0	0	0	0	2.2381	0	0	0	0.2734	0	0.7897	0.3122	0	0.3051	0	0	0.8	0	0.4016	0.4484	0	0.6197	0.4087	1.7994	0	0.4192	0.2728	0	0	3.4509	0	0	1.5682	0	0	0
340591	CA5BP1	non-coding	137.715	191.271	224.759	174.397	495.506	392.348	268.305	216.8	263.041	157.221	384.573	229.271	290.961	174.054	218.023	237.238	325.009	244.49	303.54	201.476	235.508	203.211	299.407	412.445	163.205	419.928	464.295	680.8	397.351	338.588	655.605	140.146	756.003	894.973	160.864	399.88	252.777	250.391	602.759	195.467	134.202	125.854	115.996	121.798	232.111	308.951	225.471
340618	FAM41AY1	non-coding	0	0	0	0	8.9888	0	4.0397	0	0	0	0	0	0	0	0	0	0	0	0	0	0.2599	0	0	0	0.3051	0	0	0	0	0	0	0.4866	0	0	0	0	0	0	0	0	0	0	0	0	0	0	0
340811	AKR1C8P	non-coding	0.3912	1.98	1.3299	0.7421	5.618	0.4423	0	0	0.4697	0	0	1.113	0	0.4308	0	2.9841	0	0	1.7699	0.8201	0.5199	0	0	0.8563	0	0.2926	0	3.6	2.2075	4.4181	4.9327	1.9465	10.5345	0	1.4395	0.7231	0.4192	1.6365	0.2007	0	0.3834	0	2.468	0	0	0.5743	0.3848
341056	LOC341056	non-coding	22.6917	24.5524	17.7325	17.0686	44.9438	18.1356	37.7041	8.583	23.0161	7.3126	47.3829	28.9371	13.3172	9.0474	18.4569	7.8333	26.8356	8.8165	20.354	14.7622	25.9943	21.5846	17.4836	42.2435	17.0832	23.118	23.0008	26.8	22.0751	8.8362	16.1435	27.7372	16.7312	34.7364	19.7931	27.2371	6.288	16.3654	23.4763	17.2701	42.1779	6.1129	16.659	10.4548	12.6296	21.2476	35.3982
343477	HSP90B3P	non-coding	4.6948	7.1281	7.9796	10.3896	20.2247	3.981	5.7229	3.8147	8.9246	16.4534	147.107	16.6945	14.1243	6.0316	12.6891	4.4762	7.8271	6.4429	4.4248	8.4746	6.2386	6.0542	4.3709	9.99	7.3214	7.0232	12.5702	11.6	10.596	12.451	26.009	17.0316	16.1115	4.904	6.8376	12.5339	14.2528	8.4555	7.4241	7.0651	8.4356	3.2362	8.638	2.091	5.1201	8.901	5.7715
344405	PRORSD1P	non-coding	68.8576	19.0083	81.126	28.2004	15.7303	20.3472	38.3774	11.1261	35.6984	58.5009	55.6474	13.3556	41.5658	24.1263	253.783	19.7698	26.4629	12.2075	116.814	32.5314	32.7528	37.6415	12.4883	13.7006	18.6084	38.9202	50.0134	44	58.2781	53.0174	60.0897	61.3139	38.4198	86.6367	20.8727	20.9702	42.7583	30.8215	10.4339	16.0926	65.9509	247.753	53.0619	85.7292	87.0417	28.4258	117.738
344454	AOX2P	non-coding	0	0	0	0	0	0	0	0	0	0	0	0	0	0	0	0	0	0	0	0	0	0.2632	0	0	0	0	0	0	0	0	0	0	0	0	0	0	0	0	0	0	1.5337	0	0	0	0	0	0
344595	DUBR	non-coding	22.6917	66.5291	255.791	44.1558	66.2921	65.465	155.529	15.2587	117.429	102.377	64.4628	35.0584	85.5529	86.5961	378.367	185.016	139.396	64.7677	145.133	64.5161	243.047	105.028	68.6856	96.1895	187.61	88.0825	136.4	161.6	69.3157	65.8701	236.771	48.6618	89.2332	297.507	149.348	45.7969	150.073	172.109	28.6933	131.881	320.552	190.939	26.5309	165.186	680.632	95.9012	106.579
344875	COL6A4P1	non-coding	10.5634	0.396	6.2064	2.2263	20.2247	3.981	3.7031	1.5894	3.288	0	10.4683	6.1213	3.2284	2.585	3.4607	1.119	3.3545	0.6782	6.1947	5.1941	4.419	4.4749	4.3709	0.8563	5.491	3.8042	2.4071	1.6	0.4415	3.6148	4.0359	2.9197	3.0984	13.4859	0.3599	15.1853	2.096	6.8189	2.4078	1.57	0	0	3.085	0.5227	0.3413	0.8614	3.8476
344967	LOC344967	non-coding	10.9546	3.5641	4.8764	9.2764	25.8427	4.4233	5.0497	9.8546	5.1669	10.9689	19.2837	11.6861	2.8249	4.3083	6.9214	4.8492	16.3996	1.6955	6.1947	3.2805	2.0795	3.6852	6.2441	6.8503	9.1517	2.9263	4.2792	7.2	5.7395	2.8115	9.417	12.6521	8.6754	8.1733	3.9586	8.9183	5.8688	5.4551	6.8222	7.4576	4.6012	4.315	4.936	3.1364	4.4374	7.1782	4.6172
345630	FBLL1	non-coding	3.9124	1.188	13.2993	7.4212	4.4944	120.314	21.8818	0.3179	6.576	1.8282	2.2039	3.3389	20.9847	4.7391	8.0749	1.8651	1.8636	2.0346	7.9646	0	8.3182	10.7923	9.3662	18.2674	32.9461	71.6951	6.4188	2.4	3.0905	5.2214	0	1.9465	18.5902	8.1733	10.4363	0.9641	0.8384	18.0019	25.6835	3.925	1.1503	1124.42	0.617	1.0455	303.793	4.5941	6.541
347127	SPATA31D5P	non-coding	0	0	0	0	43.8202	0	0	0	0	0	0	0	1.6142	0	0	0	0	0.3391	0	0.2734	0.2599	0	0	0	0.3051	0	0	0	0	0	0	0	0	0	0	0	0	0	0	0	0	0.3596	0	0	0	0	0.7695
347376	H3F3AP5	non-coding	0.7825	0.792	0	0.7421	3.3708	0.4423	0	0	0	1.8282	0	1.6694	0.4036	0	0	0	0.3727	0.3391	0	0	0.2599	0.2632	0.3122	0.5709	0	0.5853	0.2675	0	0	0.4016	2.2422	0.4866	0.6197	0.4087	0	0.241	0.4192	0	0.4013	0	0	0.3596	0.617	0.5227	0.3413	0.8614	0.7695
347689	SOX2-OT	non-coding	252.347	345.714	203.037	126.531	51.6854	15.9239	21.5452	99.4993	18.3189	16.4534	36.3636	251.53	3.2284	8.1857	229.558	142.492	23.1085	69.8542	479.646	754.511	1201.98	22.3743	131.751	666.762	8.5416	157.144	63.3859	145.2	1685.65	18.4758	56.9507	349.878	165.453	67.8382	80.6118	102.681	95.9966	128.196	165.337	14.9151	1.9172	83.7828	3.702	125.98	71.3401	370.971	503.655
347745	PWAR4	non-coding	0	0	0	0	10.1124	0	0	0	0	0	0	0	0	0	0	0	0	0	0	0	0	0	0	0	0	0	0	0	0	0	0	0	0	0.4087	0	0	0	0	0	0	0	0	0	0	0	0	0
347746	PWARSN	non-coding	19.1041	21.3844	6.6497	33.0241	69.6629	30.5208	32.6544	40.6898	51.6687	102.377	58.562	25.0417	38.7409	29.2962	24.2247	40.6587	31.0212	53.3401	35.3982	21.8699	45.23	39.4841	24.9766	20.2654	25.5088	24.2037	127.232	32	34.4371	48.1896	2.6906	2.4331	44.6166	14.7119	49.6626	49.4125	15.0912	266.892	86.3125	1.9625	61.2922	166.864	23.4459	136.66	39.9368	35.8912	12.6972
347918	EP400NL	non-coding	40.2973	68.5092	87.3324	154.731	108.989	98.6398	67.3287	133.513	111.792	252.285	136.639	225.932	222.76	80.1337	124.584	108.548	84.2341	92.5738	102.655	80.6452	34.8323	91.3398	71.1833	52.2335	89.6866	100.958	120.086	153.6	131.126	98.0018	138.565	153.285	55.151	90.3147	106.163	105.815	89.2895	79.645	92.9019	71.4356	163.344	97.447	123.4	171.981	156.675	126.911	74.2593
348021	LINC00442	non-coding	0	0	0	0	17.9775	0	0	0	0	0	0	0	0	0	0	0	0	0	0	0	0	0	0	0	0	0	0	0	0	0	0	0	0	1.6347	0	0.241	0	0	0	1.1775	0	0	0	0	0	0.2871	0.3848
348249	CCL15-CCL14	non-coding	0	0	0	0	0	16.2114	0	0.9441	9.089	64.6618	0	0	0	25.7074	0	40.0209	0	0	0	0	3.1037	13.0903	0	0	0	7.2632	0	0	0	4.9162	0	0	0	0	19.4944	0	0	0	0	0	0	0	43.3009	0.6325	0	2.9948	6.3601
348254	CCDC144CP	non-coding	0	0.396	0	0.3711	2.2472	0	0	0	0	1.8282	0	0	1.2107	0.4308	1.1536	0	0	0.6782	0	2.7337	0.2599	21.8479	1.561	0.2854	0.3051	0	1.6047	0	0.4415	0.4016	0.8969	0.9732	0	0.4087	0.7197	0.4821	6.7072	0.5455	0	1.9625	2.3006	0	0.617	1.5682	5.8028	0.8614	5.7715
348808	NPHP3-AS1	non-coding	0.3912	1.584	0.8866	1.4842	22.4719	1.327	1.6832	1.5894	2.3486	3.6563	1.1019	1.6694	1.6142	0	0	1.119	1.1182	0	0.885	0.5467	0.2599	0	0	0.5709	1.5253	0.8779	0.5349	1.6	0.4415	0.8033	2.2422	0	0.6197	3.678	1.4395	0.9641	1.2576	0	2.0065	0	2.684	0.3596	0	4.1819	0.6827	0.2871	0.3848
348825	TPRXL	non-coding	347.027	65.7371	178.655	54.5455	178.652	13.7123	15.149	260.351	95.3523	12.7971	23.6915	309.961	22.5989	0.8617	1.1536	96.9841	48.4532	33.2316	101.77	158.283	39.5113	5.791	74.6175	62.7943	109.515	52.6739	132.388	64.8	83.0022	238.578	173.991	154.258	526.723	25.3371	42.1053	39.53	33.9551	72.2805	215.902	108.331	3.0675	2.5171	1.851	1.5682	4.4374	26.703	73.4898
348840	ANKRD18DP	non-coding	11.3459	0.396	2.2166	3.3395	21.3483	0	0.6733	1.2716	0	1.8282	1.6529	2.7824	0	3.0158	0	0.373	0.3727	0.3391	2.6549	3.8272	4.419	0	3.7465	3.4251	1.8303	0.8779	0.8024	0	5.7395	2.0082	4.0359	3.4063	1.2393	0	0.3599	3.1335	1.2576	5.4551	15.2496	0	5.7515	0.3596	3.085	8.3638	0	0	0
348926	FAM86EP	non-coding	89.2019	64.5491	22.1656	28.9425	74.1573	52.1951	53.5263	48.3192	79.8517	62.1572	52.3416	32.276	80.3067	71.0864	38.0674	40.6587	53.6713	36.2835	113.274	46.7469	55.3678	117.136	82.7349	44.5269	40.5725	131.685	54.56	27.2	79.9117	108.846	42.6009	98.2968	53.9117	53.5349	51.462	73.7572	38.1471	53.4603	29.0946	36.1103	67.4847	85.9403	23.4459	19.8641	60.0758	41.0595	55.4059
349114	LINC00265	non-coding	99.374	83.5574	95.312	253.061	234.832	103.948	81.1311	226.973	157.825	162.706	155.923	112.41	119.048	134.418	137.274	105.19	49.1987	155.985	109.734	103.882	299.974	208.213	103.341	96.7604	39.6573	55.015	127.574	312.8	246.799	215.684	160.987	169.343	128.892	164.283	86.7296	154.504	49.0463	108.284	149.486	65.548	72.0859	180.151	47.5089	9.932	93.5272	145.287	76.9527
349152	DPY19L2P2	non-coding	23.4742	5.1481	9.3095	6.679	39.3258	13.2699	89.2106	3.1789	23.0161	27.4223	14.876	7.2343	23.0024	16.8022	47.2959	17.5317	8.1998	15.2594	8.8496	4.1006	18.196	48.1706	17.1714	1.1417	17.6933	9.6569	30.4894	2.4	4.415	12.0494	31.8386	8.2725	15.4919	10.2166	13.6752	201.265	7.5456	30.8215	4.615	3.14	44.862	41.352	8.021	0	17.7497	11.7723	28.8573
349196	LINC00965	non-coding	0.7825	2.772	4.5262	3.7106	37.0787	6.635	11.5469	4.5236	7.5155	7.3126	14.876	1.113	8.4746	1.7836	8.0749	3.3571	17.3947	4.4083	3.5398	7.3811	7.3148	7.2177	8.7418	6.4364	7.3	6.6428	1.6288	4.8	0.4415	3.6148	2.6906	0.4866	3.0984	23.3143	3.6347	4.3724	3.4416	11.1476	7.2235	2.7475	3.4509	14.0633	0	0	1.7067	6.5523	15.3905
352961	HCG26	non-coding	17.6056	28.1165	31.9184	85.7143	56.1798	35.8288	31.3079	12.3977	81.7305	199.269	75.4821	16.138	82.728	48.6834	20.7641	21.6349	15.2814	65.1068	39.823	115.09	18.196	33.6931	46.2067	17.4112	56.7405	12.8759	105.643	25.2	30.4636	84.3458	376.682	113.382	276.375	9.8079	44.6244	34.7092	28.9248	10.092	36.5187	57.3055	20.7055	12.2258	25.2969	28.2279	57.6865	158.783	37.7068
359806	PCNAP1	non-coding	0	0	0	0	10.1124	0	0	0	0	0	0	0	0	0	0	0	0	0	0	0	0	0	0	0	0	0	0	0	0	0	0.4484	0	0	0	0	0	0	0	0	0	0	0	0	0	0	0	0
359821	MRPL42P5	non-coding	9.0923	9.3062	29.9989	5.1243	22.236	1.5703	0.5959	3.4173	6.9706	3.0896	4.4187	4.0902	11.5577	2.0378	2.2494	5.6139	4.6888	6.1682	5.6283	2.7993	6.5636	0.5238	2.5289	3.4965	2.6326	4.9777	7.1463	2.668	0.8521	0	1.8206	5.2068	3.4144	4.6179	4.117	2.9985	4.586	1.1538	0	3.5129	2.9256	48.7343	10.6741	18.9336	2.9662	3.7499	9.9307
359822	KCNIP4-IT1	non-coding	0	0.396	1.7732	1.1132	84.2697	0	0	1.2716	0	0	0	0	0	0	0	3.3571	0	0.3391	0	0	0.7798	0	0.9366	1.998	0	0.5853	0	2	7.064	1.2049	2.2422	1.4599	1.2393	0	0	2.1693	0	0	0	0	0	0	0	0	0	0	0
360132	FKBP9P1	non-coding	51.6432	55.0449	99.3018	104.267	319.101	66.792	77.428	139.236	88.3065	89.5795	216.529	124.096	83.5351	90.0427	213.408	87.2857	225.867	64.7677	84.0708	109.076	125.552	979.731	199.5	108.463	74.1287	69.6466	185.879	58	169.095	61.0503	739.91	85.1582	33.4624	65.7949	82.771	147.996	80.4863	81.827	107.349	895.692	40.2607	20.8558	15.425	89.3884	46.4222	51.109	118.507
360155	CYCSP52	non-coding	0	0.396	0	0	0	0	0	0.3179	0	1.8282	1.1019	0.5565	0	0.4308	0	0	0	1.6955	0	0	0.2599	0.2632	0	0	0	0	0.2675	0.8	0	0.8033	0.4484	0.4866	1.2393	0.4087	0	0	0.4192	0	0	0	0	0	0	1.5682	0.3413	0	0.3848
373861	HILS1	non-coding	0	0.396	0	0	2.236	0	0	0.3179	0.9253	0	0.551	0	2.8249	0.4308	0	0	0.7454	0.6172	0	0	0	0.5265	0.3122	0	1.2202	0.2926	0	0	0	0.4016	0	0	0.6197	0	1.4395	1.4486	0	0.5455	0.2007	0.785	0	6.2711	0	2.091	1.3654	0	0.3848
374387	DKFZp779M0652	non-coding	1.1737	4.7521	1.3299	0.3711	6.7416	9.7313	20.1986	0.3179	1.8789	3.6563	1.6529	3.3389	1.6142	2.585	0	5.9683	7.0816	2.3737	0.885	5.1941	0.2599	1.0529	5.6197	15.1277	2.7455	1.7558	0.5349	0.4	8.83	1.2049	13.4529	0.9732	0	2.8606	6.4777	0.241	6.7072	0.2728	1.2039	1.57	0	191.658	6.17	4.7047	3.0721	2.0099	3.8476
374443	LOC374443	non-coding	943.271	284.333	159.592	178.479	155.056	203.472	238.344	63.8957	178.962	246.801	299.724	123.539	202.179	308.041	409.513	101.087	408.125	132.248	181.416	211.318	516.766	185.838	126.444	126.73	259.298	401.492	127.039	65.6	215.452	71.8948	186.547	167.883	107.823	277.891	239.316	135.945	768.812	96.0104	45.9493	111.863	351.61	28.7666	732.377	606.9	48.8116	190.08	180.839
374491	TPTE2P6	non-coding	0.3912	0.396	2.6599	1.4842	15.7303	1.327	4.3764	0.6358	2.8183	1.8282	3.3058	1.6694	1.6142	2.585	10.382	0.746	1.8636	4.7474	0.885	7.1077	4.679	1.3161	0.3122	1.998	1.8303	0.8779	6.6863	1.6	2.2075	2.0082	4.4843	0.9732	12.3935	10.6253	3.9586	3.6155	0.8384	0.5455	0	5.8875	12.2699	1.4383	0	8.3638	2.3894	2.297	4.6172
374500	THSD1P1	non-coding	95.4617	106.13	109.941	91.6512	60.6742	75.6386	66.6554	130.335	107.095	118.83	103.03	100.723	142.454	80.5646	176.494	48.8651	39.508	106.816	104.425	88.573	121.393	35.2093	97.0965	52.2335	54.8003	55.8929	210.751	74.8	122.737	93.5837	164.574	158.637	141.905	127.912	97.5259	84.6038	54.9151	136.976	76.4485	122.853	77.0706	245.595	133.889	76.8427	107.864	89.0101	63.486
374650	GOLGA6L5P	non-coding	4.3036	25.3444	39.4547	28.5714	44.9438	16.3663	12.4558	4.1326	38.5167	78.6106	12.6722	18.3639	53.2688	22.8338	5.7678	23.127	5.9635	15.2594	10.6195	25.4237	28.5937	12.6349	35.9038	11.4172	11.5921	6.1453	52.6879	43.2	42.8256	57.0338	80.2691	21.8978	70.0232	81.7327	18.3536	34.7092	15.0912	14.1834	41.1337	44.7454	25.6902	94.9299	6.787	18.8186	15.019	16.6535	30.0115
374666	WASH3P	non-coding	333.725	360.366	250.028	390.353	423.596	368.462	725.467	373.202	273.375	769.653	358.127	519.755	278.047	219.721	179.955	330.119	222.885	284.842	216.814	224.986	300.754	382.206	501.093	262.88	210.489	283.269	608.986	554.8	500.221	527.764	597.758	755.718	744.229	651.819	226.721	254.293	238.524	376.404	496.012	279.855	270.322	367.853	283.819	490.329	279.216	243.486	237.784
375133	PI4KAP2	non-coding	198.357	167.115	62.0636	141.002	77.5281	54.4067	64.2989	141.143	147.021	131.627	146.006	222.593	125.101	44.806	78.442	174.944	63.7346	131.909	282.301	172.225	154.926	132.667	79.3007	41.6726	35.9967	79.3035	192.832	194	266.225	305.653	61.8834	250.122	55.7707	307.315	75.2137	227.056	48.2079	259.392	123.802	163.674	202.071	430.061	454.728	5.2274	119.469	65.4655	98.4994
375260	WASH2P	non-coding	159.233	239.188	154.272	217.811	528.09	398.54	389.497	189.144	365.909	274.223	145.454	225.932	274.011	171.038	238.787	252.159	149.087	319.43	140.708	162.11	336.626	396.42	481.424	281.147	114.701	275.66	727.467	510.8	600.883	549.051	589.238	329.44	309.218	773.192	181.017	186.803	225.529	163.109	501.43	292.022	117.331	375.764	182.014	261.892	160.771	164.525	222.393
375513	GUSBP4	non-coding	387.324	197.211	127.674	235.25	150.562	98.6398	87.1907	55.3127	220.766	215.722	218.733	156.372	141.243	80.1337	149.963	56.3254	303.392	101.729	150.442	105.522	346.764	63.1745	148.923	213.501	73.8236	138.123	266.114	105.2	308.168	169.093	148.43	154.258	488.304	886.8	119.838	134.498	99.7694	278.757	256.032	193.897	139.954	197.051	254.203	936.749	137.56	101.644	224.702
375690	WASH5P	non-coding	170.579	76.0333	101.075	132.468	165.168	162.778	443.023	111.897	227.342	272.395	127.824	221.48	203.793	221.445	207.641	122.722	175.177	121.397	96.4602	168.398	171.822	285.865	355.292	235.193	108.905	138.123	432.469	107.6	731.567	332.965	186.547	166.91	117.118	323.662	205.848	217.415	238.944	109.648	155.104	116.573	242.715	237.325	213.481	216.937	253.957	77.8121	170.835
375719	AQP7P1	non-coding	0.3912	1.188	16.4025	8.1633	25.8427	0.4423	0.6733	0	4.6972	0	1.6529	1.6694	3.632	0.4308	0	2.2381	0.7454	3.391	0.885	0.2734	0.2599	0.2632	0.3122	0	0.3051	0.5853	0.2675	2	1.3245	8.8362	13.4529	10.219	6.1967	2.0433	0.7197	0.241	0	4.3641	0.2007	9.8126	1.1503	0.7192	5.553	0	0	0.5743	1.5391
375940	DMBT1P1	non-coding	0	0	0	0	6.7416	0	0	0	0	0	0	0	0	0	0	0	0	0	0	0	0	0	0	0	0.3051	0	0	0	0	0	0.4484	0	0	0	0	0	0	0	0	0	0	0	0	0	0	0	0
376412	RNF126P1	non-coding	1.1737	0	0.4433	1.1132	4.4944	0.4423	1.6832	3.8147	0.9394	1.8282	3.3058	4.4519	2.0178	14.6481	0	1.119	1.1182	1.6955	1.7699	0.8201	0.5199	1.3161	1.561	1.1417	0	0.8779	1.6047	2	0	0.4016	2.2422	1.4599	1.2393	1.6347	0.7197	5.0618	1.2576	0.2728	2.2072	2.355	1.5337	0.3596	0	35.5463	0.3413	0.2871	1.1543
376693	RPS10P7	non-coding	40.2973	48.7088	73.1464	29.6846	71.9101	30.5208	43.7637	31.471	54.9567	49.3601	77.135	76.7947	54.883	48.2526	55.3708	39.9127	39.8807	32.2143	90.2655	60.4155	75.6434	54.488	73.0565	73.9261	42.4028	31.3117	185.344	60.8	52.5386	83.1409	95.0673	74.4526	99.1479	74.7855	43.1849	13.257	39.8239	42.2773	42.1369	65.548	56.7485	158.576	103.656	93.5703	123.224	55.1288	30.7811
376844	SDC4P	non-coding	0	0	0	0	1.1236	0	0	0	0	0	0	0	0.4036	0	0	0	0	0	0	0	0	0	0	0	0	0	0	0	0	0	0	0	0.6197	0	0	0	0	0	0	0	0	0.3596	0	0	0	0	0
378805	LINC-PINT	non-coding	89.9844	98.2097	228.305	240.445	43.8202	53.5221	13.8024	55.3127	92.0643	292.505	104.132	65.665	105.73	96.5051	194.951	74.9762	48.8259	57.6467	37.1681	44.0131	29.3735	44.4854	30.2841	28.5429	53.6899	19.899	32.3616	70	66.6667	196.807	129.148	45.7421	164.833	38.4144	79.5322	54.2332	91.3855	28.6395	30.9004	80.4632	435.583	395.541	444.239	722.948	82.6043	95.0398	43.4783
378825	PICSAR	non-coding	0	0	0	1.1132	1.1236	0	0.3366	2.2252	0.4697	0	1.6529	0	4.4391	0	0	0.373	0	2.0346	3.5398	0.2734	0	0	0	0	0.6101	0	0.2675	0.8	0	15.6642	0	0.4866	0.6197	0	1.4395	29.4064	0.4192	0.2728	90.0928	111.863	0.7669	0	11.723	0	1.024	0.5743	0.3848
378832	COL18A1-AS1	non-coding	0	0	0	0.3711	6.7416	0.8847	0.6733	0	0	0	0	0	0.4036	0.4308	0	0	0	0	0.885	0	0	0.2632	0	0	0	0	0	0.8	0	0	0	0	0	0	0	0	0	0	0	0.3925	0	0.7192	11.723	0	0	0.2871	0
378938	MALAT1	non-coding	843.2	1648.04	6956.11	4173.13	953.787	1015.06	689.392	2938.41	5330.49	4552.93	3211.25	1306.43	8098.69	2409.25	2344.9	1866.69	412.125	2062.8	1714.58	540.629	898.131	715.654	1042.67	739.723	672.091	452.15	2578.23	2353.55	6341.89	3387.9	5269.47	3372.37	5834.16	2947.42	1800.85	1708.8	540.855	1979.09	1817.53	3976.67	4449.77	5140.77	3089.75	1949.12	2090.58	1800.32	2373.19
379013	RNF138P1	non-coding	32.4726	13.4642	20.8356	8.9054	46.0674	10.1736	5.0497	14.305	14.5612	10.9689	26.9972	15.5815	11.2994	9.909	21.9176	9.6984	16.7723	8.4774	48.6726	8.2012	14.5568	16.0569	13.4249	8.5629	17.9983	16.9727	27.5475	9.6	10.1545	10.4428	5.8296	15.0852	11.7738	21.6592	11.516	12.0518	10.8992	22.6388	14.2463	7.8501	19.1718	13.3046	33.3179	16.7277	20.1391	14.3565	20.7772
386593	CHKB-CPT1B	non-coding	191.655	292.182	406.526	717.05	270.214	180.971	74.6474	366.917	428.601	671.371	448.264	217.919	472.09	421.844	428.12	272.231	199.236	242.502	271.044	165.631	292.628	208.702	222.96	119.929	131.321	163.245	184.236	544.028	658.049	839.739	534.964	619.577	1267.75	734.884	340.52	461.137	207.973	301.151	272.724	405.491	299.433	482.751	484.523	304.124	212.621	295.881	185.41
386607	ZFP91-CNTF	non-coding	0	4.2531	0	0	4.9438	0	2.3464	1.2525	0	5.0274	0	0	1.7353	0	0	0	1.2001	0	0	0	0	2.9429	0	1.41	1.5131	0	1.463	0	0	1.8677	1.4574	2.8613	0	0	5.5924	5.0738	0	6.1343	0	0	0	0	0	0	0	0	2.6318
386757	SLC6A10P	non-coding	8.6072	10.2962	152.499	20.0371	86.5169	10.1736	75.4082	55.3127	203.387	1.8282	63.9118	52.3094	30.2663	24.1263	193.798	63.7857	12.2997	79.688	519.469	21.8699	74.3436	135.036	29.0353	24.2615	33.2511	15.5095	73.0142	313.2	115.673	21.6889	207.623	88.5645	42.7576	335.921	6.4777	564.025	46.5311	21.0023	25.4828	32.1853	3.4509	2.1575	274.564	77.3654	24.9178	21.8218	290.881
387036	GUSBP2	non-coding	17.6056	17.4243	7.9796	8.9054	38.2022	11.0583	17.1688	7.9472	24.8949	10.9689	53.4435	17.251	22.5989	19.3872	24.2247	14.9206	15.6541	30.1797	15.0442	16.6758	18.196	22.3743	14.3615	11.7026	21.659	20.7769	60.444	18.8	12.362	14.0576	13.4529	22.871	16.7312	62.9342	14.395	26.9961	51.1423	81.827	25.2822	13.7376	19.9387	16.1812	17.276	83.6383	36.8647	15.505	25.0096
387066	SNHG5	non-coding	1694.05	3851.96	555.469	647.866	551.685	4146.85	3281.27	2565.68	1171.94	709.324	677.686	1040.62	1426.15	3891.22	2818.14	1693.86	2547.52	365.887	1353.1	1781.03	526.644	415.109	2915.7	440.702	810.23	464.116	867.344	2555.2	1802.65	1810.22	447.534	3172.75	4052.05	1862.28	491.588	1151.67	2739.89	295.123	1279.76	695.908	504.985	534.7	1739.94	6365.92	2783.97	1566	405.925
387071	FAM136BP	non-coding	1.9562	1.98	0	0	2.2472	0	0	0	0.4697	0	1.1019	0	0	0	0	0.373	0	0	0	0.8201	0.5199	1.5794	0	0	1.5253	0	1.6047	0	0	0	0	2.4331	0	0	0.3599	0.9641	0	0.5455	0	0	0	0	0	0	1.024	0	1.1543
387254	SLC7A5P2	non-coding	5.2739	3.3977	5.4838	4.7347	51.2247	1.8843	5.1473	16.8322	5.8714	11.755	3.416	6.8781	4.9475	3.0072	0	7.4864	0	5.9071	4.708	4.6966	7.5487	2.3717	0.8398	1.4814	3.2366	0	10.2514	6.212	14.3841	22.1468	14.287	19.6399	6.4074	5.5783	5.3693	8.0578	2.0122	3.8813	1.4788	13.0547	6.1043	6.6019	7.3608	9.0434	4.2019	3.8992	3.0281
387328	ZNF322P1	non-coding	48.1221	53.4609	29.2586	29.3135	38.2022	35.8288	20.8719	24.1596	369.197	20.1097	74.9311	14.4686	25.8273	19.818	23.0712	26.1111	56.2803	19.6677	41.5929	35.2652	15.5966	15.2672	18.7324	56.5149	15.2528	47.6992	16.0471	26.4	12.8035	36.5499	12.5561	45.2555	40.8985	551.696	27.7103	26.514	67.9103	109.103	202.257	29.0452	59.4325	41.352	51.8279	71.6153	60.0758	45.0793	49.6345
387486	LINC00320	non-coding	0	0	0.8866	0	11.236	0	0	0	0	0	0.551	0	0	0	2.3071	0	0	0	0	0.2734	0	0	0	0	0	0	0	0.8	0	0	0	0	0	0	0	0	0	0	0	0	0	0	0	0	0	0	0
387590	TPTEP1	non-coding	607.59	9.5042	3.9898	405.566	19.1011	264.072	9.7627	5.722	60.1236	25.5941	16.5289	3436.84	104.923	51.2684	1.1536	45.5079	8.9452	98.6775	1753.98	17.4959	7.5383	12.3717	4.9953	11.4172	14.6427	40.676	1.8722	3.6	2.2075	3.2132	5.3812	10.7056	351.356	351.859	30.2294	167.279	18.864	59.461	447.454	14.1301	2.684	34.1604	97.4857	1.5682	14.6776	24.406	491.343
387628	KGFLP1	non-coding	14.4757	3.5641	3.1032	0	7.8652	1.7693	0.6733	0	4.6972	0	16.5289	0	0	0	8.0749	3.3571	38.7626	7.7993	3.5398	4.1006	10.6577	12.8981	2.1855	5.1377	10.0669	16.0948	8.0235	0	0.883	0.8033	0	3.4063	0	38.0057	8.637	13.7391	23.056	4.3641	2.8091	3.14	3.8344	11.8662	0	18.8186	11.9469	2.297	2.3086
387644	LINC00202-1	non-coding	0	2.772	5.763	7.0501	30.3371	0	1.0099	6.9936	2.3486	7.3126	13.7741	5.0083	10.4923	4.3083	0	3.3571	1.1182	1.6955	3.5398	0	1.5597	3.9484	0.9366	1.4271	1.2202	6.4379	16.0471	0.4	4.8565	1.2049	3.5874	1.9465	48.3346	22.4765	2.879	70.6237	1.2576	26.4574	31.9037	1.1775	1.5337	0.3596	1.851	3.6592	1.3654	4.3069	2.3086
387646	LRRC37A6P	non-coding	11.3459	22.5724	4.4331	16.3265	75.2809	7.5196	35.3476	2.2252	2.8183	74.9543	8.2645	21.1464	11.703	27.1421	1.1536	4.8492	26.4629	9.4947	100.885	5.4675	3.1193	24.2169	43.0846	32.8243	24.4045	3.219	101.364	27.2	6.181	89.9689	13.9013	36.983	26.646	35.5537	50.0225	16.6315	6.288	136.651	45.1467	5.8875	1.9172	12.945	5.553	2.6137	11.2642	23.5446	29.242
387647	PTCHD3P1	non-coding	302.093	356.093	368.21	351.699	328.404	272.087	262.697	264.942	466.615	367.459	244.7	249.388	322.308	547.356	471.863	251.987	387.499	341.078	302.743	290.131	191.666	388.473	464.021	314.874	393.038	140.197	378.829	370.46	269.073	526.579	313.211	280.608	375.777	413.38	458.659	307.881	429.025	227.826	319.374	557.81	542.738	1277.3	499.152	464.109	658.619	330.934	136.637
387742	FAM99A	non-coding	0	0	0	0	13.4831	0	0	0	0	0	0	0	0	0	0	0	0	0	0	0	0	0	0	0	0	0	0	0	1.3245	1.2049	0	0	0	0	0	0	0	0	0	0	0	0	0	0	0	0	0
387751	GVINP1	non-coding	34.4288	68.1131	63.8369	257.143	115.73	50.8681	34.3377	9.8546	117.899	477.148	306.887	33.389	100.081	213.69	128.045	48.119	17.5177	226.178	104.425	194.095	75.6434	52.6454	11.8639	14.5569	147.952	24.8738	26.2102	44.4	23.3996	5.2214	5.8296	16.545	38.4198	16.7552	109.762	75.6854	85.0975	26.1847	29.4959	48.2779	133.052	6.8321	233.842	27.7052	50.5183	224.822	73.8746
387841	RPL13AP20	non-coding	58.2942	39.2047	13.7427	35.9926	56.1798	57.0607	84.1609	27.0206	41.335	62.1572	54.5455	49.527	53.2688	52.9917	63.4457	16.4127	62.6165	16.6158	40.708	32.5314	41.3309	17.1098	37.4649	46.8103	61.6214	65.2572	15.7796	28	38.8521	20.484	26.9058	53.528	65.6855	61.2996	42.1053	74.7213	51.1423	17.7292	34.5122	37.6803	105.445	20.1366	117.847	88.3429	37.2061	54.5546	34.2439
387978	LINC01551	non-coding	0	0	0	0	32.5843	0	0	0	0	0	0	0	0	0	0	0	0	0	0	0	0	0	0	0	0	0	0	0	0	0.4016	0	0	0	0	0	52.3049	0	0	0.4013	0	0	0.3596	0	0	5.4614	0	0.7695
388007	SERPINA13P	non-coding	0	0	0	0	4.4944	0	0	0	0	0	0	0	0	0	0	0	0	0	0	0	0	0	0	0	0	0	0	0	0	0	0	0	0	0	0	0	0	0	0	0	0	0	0	0	0	0	0
388011	LINC01550	non-coding	102.504	14.6522	5.763	14.4712	46.0674	10.6159	3.7031	4.7683	24.8949	21.9378	44.6281	2.7824	36.7232	15.9406	53.0637	10.8175	27.5811	30.1797	10.6195	7.3811	6.2386	2.6323	17.4836	6.8503	47.5888	19.6064	23.0008	3.6	4.8565	12.0494	30.4933	1.9465	8.0558	20.0245	27.7103	12.0518	14.672	8.1827	53.1728	31.4003	7.2853	1.7979	17.893	26.6597	4.0961	21.2476	20.0077
388152	GOLGA2P7	non-coding	334.898	161.571	406.073	238.961	806.742	490.988	1230.43	277.517	558.022	641.682	273.829	539.232	1315.98	481.664	144.195	398.754	221.021	532.723	289.38	258.611	326.748	453.014	220.418	245.469	251.672	452.996	523.937	901.2	709.934	1079.63	110.314	448.662	355.693	1526.36	244.714	939.801	320.688	707.804	569.651	830.144	251.534	289.824	126.485	579.718	436.915	227.119	470.95
388165	UBE2Q2P1	non-coding	4.6948	15.0483	19.0624	12.987	13.4831	7.0773	9.7627	1.9073	17.3795	5.4845	17.0799	6.6778	26.2308	7.7549	3.4607	14.9206	4.4726	12.5466	7.9646	18.5894	20.0156	2.6323	24.9766	14.5569	10.3719	8.779	26.4777	9.6	26.4901	33.3367	29.5964	8.2725	29.1247	58.4389	9.7166	18.3188	18.4448	5.1824	22.8743	30.2227	8.4356	36.3179	8.638	8.3638	3.7547	10.0495	10.3886
388182	SPATA41	non-coding	17.6056	41.9767	9.7529	24.8609	70.7865	41.5791	19.5253	32.1068	22.5464	20.1097	23.6915	13.3556	33.4948	10.3398	10.382	44.7619	24.2266	19.6677	44.2478	19.6829	36.1321	65.5436	59.0072	28.8283	13.4225	45.9434	19.7914	21.6	29.1391	39.763	22.4215	19.9513	101.007	52.7176	13.6752	54.9563	25.9904	20.184	128.016	30.2227	21.089	2.8767	6.17	35.0235	10.2402	18.9505	33.8592
388242	LOC388242	non-coding	5.4773	7.5241	16.4025	15.9555	24.7191	19.9049	25.9216	16.5302	4.2274	65.8135	8.2645	102.393	16.9492	34.0353	24.2247	13.8016	172.195	9.4947	44.2478	21.3231	1.0398	21.5846	10.615	8.2774	16.7781	9.3643	44.9318	5.2	6.6225	59.0421	8.9686	3.8929	3.718	4.0866	24.8313	2.6514	97.6734	16.9109	16.8548	11.7751	59.816	26.2496	20.9779	273.915	13.3123	45.6536	11.9277
388387	LINC00671	non-coding	0	0	0	0.7421	6.7416	0.8847	0	0	1.4091	1.8282	0.551	0.5565	1.6142	0.4308	0	0.746	0.7454	0	0	0	0.2599	0.2632	0	0	0	0	0.2675	0	0.4415	0	0.4484	0	0	0	0	0	0.8384	0.2728	0.2007	0	0.7669	1.0787	4.936	0	0.3413	0	0.3848
388428	AATK-AS1	non-coding	0	0	0	0	3.3708	0	0.3366	0	0	0	0	0	0.4036	0	1.1536	0	0	0	0	0.2734	0.2599	0	0	0	0	0	0	0	0	0.4016	0	0	0.6197	0	0	0	0	0	0	0	0	1.4383	0	0	0	0	0.3848
388503	C3P1	non-coding	0	0	0	0	4.4944	0	0	0	0	0	0	0	0	0	0	0	0	0	0	0	0	0	0	0	0	0	0	0	0.4415	1.2049	0	0	0	0	0	0	0	0	0	0	0	0	22.8289	0	0.6827	0	0
388507	ZNF788	non-coding	77.4648	50.6889	23.4955	74.9536	161.798	120.756	25.5849	118.573	81.7305	80.4388	285.399	17.8075	86.36	103.829	33.4532	31.3333	264.629	49.1692	146.903	71.8972	12.2173	41.5899	57.4461	39.96	153.138	75.7919	110.725	9.2	17.66	37.3531	6.278	2.9197	7.4361	47.8136	70.1754	13.498	139.174	9.2737	133.634	14.9151	35.6595	46.0266	294.308	37.6372	33.11	62.02	121.585
388524	RPSAP58	non-coding	13793.4	8576.71	4534.19	6529.87	6298.88	13856	11636.4	8603.35	6295.13	9316.27	6309.64	11983.3	6649.72	10850.8	12332.7	5289.36	15377.6	4886.74	7746.9	6598.14	6483.49	3704.92	5512.64	5091.48	10503.7	14327.6	3438.62	5313.6	6414.57	7425.65	3239.01	19151.8	10804.6	11535.3	10178.3	9069.48	14021	3051.6	3924.15	9301.54	9874.62	5754.76	53315.4	58092	9519.97	7435.22	9478.65
388550	CEACAM22P	non-coding	0	0	0	1.1132	3.3708	0	1.0099	0.3179	0.9394	3.6563	1.6529	0	0.4036	0.4308	0	0	0.7454	0	1.7699	0	0.2599	0.2632	0	0	0.6101	0	2.4071	0	0	0.4016	0.8969	0.4866	0.6197	0	0	0.241	0	0.2728	0.8026	0	0.7669	0	12.34	4.7047	0.3413	0.5743	0.3848
388685	LINC01138	non-coding	0.7825	0.396	2.2166	0.7421	5.618	1.7693	7.0695	0.9537	3.7577	3.6563	3.3058	0.5565	4.0355	0	4.6142	2.9841	0	2.0346	0	5.4675	3.3793	3.1587	4.3709	0.5709	2.7455	3.5116	12.5702	0.8	3.9735	2.4099	2.6906	2.4331	9.2951	10.2166	1.7994	0	1.6768	6.2734	2.8091	2.355	4.9847	1.7979	0.617	111.866	19.115	4.0198	1.5391
388692	LOC388692	non-coding	72.3787	96.6256	208.356	239.703	413.483	101.294	159.232	147.501	500.717	652.651	287.603	55.0918	393.059	253.757	147.655	139.881	60.3802	313.666	167.257	174.139	70.1846	119.242	106.15	38.5329	110.43	45.6507	767.05	42.8	102.87	215.283	257.848	30.6569	712.626	372.293	183.176	52.3049	85.9359	202.113	109.556	228.437	293.328	117.584	109.209	921.589	432.137	401.407	156.214
388714	FMO6P	non-coding	3.1299	12.6722	22.1656	3.3395	31.4607	97.7552	23.2284	1.2716	69.5179	9.1408	66.1157	1.6694	0	10.7707	9.2285	29.8413	6.3362	29.1624	31.8584	94.8606	3.1193	47.9073	20.6057	8.5629	8.8466	103.592	24.3381	83.6	6.6225	0	52.9148	107.056	4.9574	2.452	3.2389	2.1693	305.596	4.3641	0.602	2.355	1.9172	0	0.617	14.6367	0.3413	23.5446	162.37
388762	OR2M1P	non-coding	0	0	0	0	2.2472	0	0	0	0	0	0	0	0	0	0	0	0	0	0	0	0	0	0	0	0	0	0	0	0	0	0	0	0	0	0	0	0	0	0	0	0	0	0	0	0	0	0
388789	LINC00493	non-coding	514.085	579.358	503.602	402.597	453.933	999.226	1322.34	600.493	300.618	500.914	478.237	484.697	376.11	367.064	603.311	587.5	819.605	406.918	553.097	541.553	410.71	774.414	1129.57	560.011	356.916	1012.22	822.145	549.2	1154.97	709.71	704.484	633.577	824.167	809.154	493.027	501.597	754.14	341.491	535.54	587.97	604.294	1004.67	1282.74	987.977	1105.26	491.566	553.674
388796	SNHG17	non-coding	308.685	414.619	827.219	401.113	816.854	523.278	1448.58	1000.72	696.119	489.945	275.482	786.867	998.789	307.179	815.566	233.508	1231.83	298.067	600	428.376	1310.37	376.152	552.919	1328.1	260.823	452.118	500.669	428.4	1388.52	990.862	556.054	757.178	1208.99	209.236	540.531	677.312	386.083	537.058	479.559	558.924	744.249	301.69	2699.37	1074.23	310.619	507.645	388.996
388815	MIR99AHG	non-coding	3.9124	6.3361	26.5987	8.1633	37.0787	22.5589	10.436	3.4968	16.44	14.6252	23.1405	1.6694	25.4237	10.7707	29.9925	11.5635	19.754	18.3113	6.1947	4.374	8.0582	7.3704	2.1855	2.8543	22.8792	7.6085	26.4777	10	8.3885	6.4263	27.3543	1.9465	18.5902	27.3805	17.9937	112.323	11.7376	48.0052	64.8106	9.8126	3.0675	38.835	0	2.091	9.5575	14.9307	24.2401
388910	LINC00207	non-coding	0	0	0	0	0	0	0	0	0	0	0	0	0	0	0	0	0	0	0	0	0	0	0	0	0	0.2926	0	0	0.4415	0	0	0	0	0	0	0	0	0	0	0	0	0	0	0	0	0	0
388955	LOC388955	non-coding	555.164	441.943	417.156	368.089	658.427	364.923	454.806	470.794	394.091	438.757	393.939	283.806	271.993	739.298	543.326	288.341	543.794	201.085	469.026	390.377	238.108	278.758	362.473	314.543	549.712	514.156	147.098	337.2	389.404	387.991	384.305	385.401	1277.77	471.598	477.913	338.897	383.987	214.114	302.583	1345.5	684.816	554.117	1587.54	1093.57	863.932	470.031	423.24
388965	FUNDC2P2	non-coding	2.7387	2.376	3.9898	1.4842	5.618	2.654	5.3863	3.1789	5.6366	3.6563	5.5096	2.2259	2.4213	2.585	6.9214	1.8651	5.9635	2.0346	8.8496	2.187	2.3395	1.0529	1.2488	1.1417	1.8303	4.0969	4.2792	1.2	3.532	1.6066	2.6906	1.4599	3.0984	2.8606	3.5987	3.1335	3.3536	1.6365	3.6117	4.71	2.684	12.2258	17.893	19.8641	4.0961	4.0198	1.9238
389033	LOC389033	non-coding	0.3912	0	0	0	0	0.4423	0.3366	0.6358	0.4697	0	0	0.5565	0.4036	0.4308	0	0	0	0.6782	0	0	0.2599	0.5265	0	0	0	0	0	0	0	0	0	0	0	0	0	0	0.4192	0	0.2007	0	0	5.0342	0	0	1.024	0.2871	0
389293	ISCA1P1	non-coding	74.3349	91.8735	77.1362	74.9536	59.5506	56.176	32.3178	101.725	35.2287	27.4223	35.8127	60.6566	48.0226	73.2405	117.663	74.9762	66.3436	55.9512	103.54	56.3149	92.2797	41.8531	84.9204	77.0658	50.6394	102.129	49.7459	73.6	79.0287	85.5508	27.3543	118.735	97.2889	29.4238	60.8187	40.2531	76.2943	58.6427	31.1011	62.0155	80.138	104.639	127.719	128.071	77.1428	46.515	66.1793
389332	LOC389332	non-coding	1.1737	1.188	0.4433	0	12.3596	1.7693	3.7031	1.2716	0	0	3.8567	8.9037	0.4036	0.4308	0	0	1.1182	0	3.5398	0	0	0	0.9366	0.8563	0.3051	2.0484	1.3373	1.2	0.883	0.4016	0	5.3528	0.6197	36.3711	0.7197	1.2052	0	0.5455	12.4404	1.1775	0.3834	226.537	3.702	1.5682	2.3894	0	16.1601
389458	RBAKDN	non-coding	5.0861	3.9601	6.2064	4.0223	6.8315	6.1926	6.7901	3.8147	2.8183	7.3126	2.7548	32.1703	1.7111	67.6225	6.9214	3.7302	1.1182	4.605	0	11.4571	11.2009	5.2224	8.4296	10.7493	12.8124	2.1947	1.6047	6.564	3.9735	31.3284	5.3812	2.9197	24.787	3.4859	4.8295	20.2471	14.672	2.8258	12.4404	9.0276	0.3834	6.8321	0	0.5227	5.8028	4.8812	0.481
389538	MGC72080	non-coding	344.883	199.995	120.222	126.278	152.786	266.398	247.598	355.391	113.333	145.009	49.9394	695.086	67.3971	107.435	309.915	245.62	136.508	57.9145	146.203	188.458	131.674	296.341	180.768	294.885	198.034	213.4	312.827	75.012	267.846	72.4852	132.251	95.2019	195.737	405.709	122.973	167.354	290.14	161.45	345.98	31.102	153.566	61.7799	258.035	1167.93	464.274	149.06	153.582
389634	LINC00937	non-coding	1.1737	4.3561	2.2166	24.8609	15.7303	1.7693	22.2185	1.2716	6.576	23.766	4.4077	2.2259	16.5456	12.0631	8.0749	5.2222	0.3727	2.3737	5.3097	4.6473	3.8991	1.8426	3.7465	0.2854	4.2708	4.3895	5.8839	4.8	1.766	3.6148	0	4.3796	11.7738	2.8606	3.5987	1.9283	6.7072	5.4551	4.4143	10.2051	24.5399	0.7192	25.2969	6.7956	3.4134	7.7525	8.08
389705	LOC389705	non-coding	1.5649	3.5641	3.9898	11.5028	1.1236	1.7693	5.7229	1.5894	3.288	5.4845	18.1818	5.5648	6.0533	1.7233	1.1536	1.119	1.8636	1.6955	6.1947	2.187	11.9574	6.3175	1.2488	4.5669	17.3882	4.0969	12.3028	2.4	0.4415	0.4016	6.7265	1.9465	1.859	2.8606	6.1179	7.4721	8.8032	13.6378	8.0261	5.495	5.3681	5.0342	2.468	12.023	5.4614	18.0892	8.8496
389715	FAM205BP	non-coding	0	0.396	0	0	49.4382	0	0	0.6358	0	0	0	0	2.4213	0	0	0	0	0.6782	0	0	0.2599	0	0.3122	0	14.0326	0	0	0	0	0	0	0	0	0.4087	0	0	0	0.5455	0	0	3.0675	1.0787	0	0	0	0	0
389741	GLIDR	non-coding	232.003	166.719	174.221	202.969	97.7528	63.2533	60.5959	80.7439	105.216	159.049	110.744	52.3094	108.959	74.9638	153.423	115.262	148.341	206.172	61.9469	80.3718	124.513	46.0648	98.6575	167.547	44.8433	127.881	215.833	67.6	386.755	112.863	264.126	93.4307	61.9675	286.065	132.074	47.7252	121.149	174.837	46.5513	81.6407	172.929	346.638	82.0608	70.047	328.369	103.079	145.441
389791	PTGES2-AS1	non-coding	6.2598	1.98	2.6599	2.9685	10.1124	1.7693	1.6832	4.1326	0.9394	9.1408	1.1019	4.4519	3.632	3.4466	1.1536	2.2381	1.8636	3.7301	2.6549	2.4604	1.2997	0.5265	2.1855	0.2854	0.9152	4.0969	5.349	2.4	5.298	2.4099	2.6906	11.1922	24.1673	4.4953	1.7994	1.9283	0.4192	1.9093	2.2072	14.1301	0.7669	12.5854	11.723	8.8866	9.2162	1.7228	3.8476
389932	AKR1C6P	non-coding	1.1737	0.396	24.8254	0.7421	0	0	0.3366	0	0	0	0	0	0	0	2.3071	0	0	0	0	0.2734	3.3793	0	0.3122	2.8543	0	0.2926	0	3.2	0	0	30.4933	0.4866	0	0	2.879	0.7231	0.4192	0.2728	0	0	0	0	0	1.0455	0	0	0
390003	GUCY2GP	non-coding	0	0	0	0	0	0	0	0	0	1.8282	0	0	0	0	1.1536	0	0	0	0	0	0	0	0	0	0	0	0	0	0	0	0	0	0	0	0	0	0	0	0	0	0	0	1.851	0	0	0	0
390053	OR52A4P	non-coding	0	0	0	0	4.4944	0	0	0	0	0	0	0	0	0	0	0	0	0	0	0	0	0	0	0	0	0	0	0	0	0	0	0	0	0	0	0	0	0	0	0	0	0	0	0	0	0	0
390226	GUCY2EP	non-coding	3.9124	2.376	16.4025	0.3711	2.2472	0	0	0	0	0	0	0	0	0	1.1536	0.373	0	0	0	3.8272	6.7585	0	4.6831	2.2834	0	0	0	2	5.7395	19.6807	144.843	0.4866	0.6197	0	0	0	0	0	0	0	0	0	0	0	0.3413	4.0198	0
390284	SRP14P1	non-coding	1.5649	8.3161	6.6497	7.0501	6.7416	8.8466	2.3565	6.6757	7.5155	7.3126	12.6722	8.3472	7.2639	4.7391	3.4607	8.5794	6.3362	3.7301	1.7699	9.0213	1.8196	7.1071	4.0587	2.8543	2.7455	6.4379	11.2329	3.6	4.415	1.2049	3.5874	4.3796	4.9574	2.8606	4.3185	6.2669	10.0608	4.3641	5.6183	3.14	9.5859	5.0342	8.638	7.8411	3.7547	5.4555	2.3086
390535	GOLGA8EP	non-coding	0	0	0	0	4.4944	0	0	0	0.4697	0	0	0	0.4036	0	0	0	0	0	0	0.5467	0	0	0	0	0	0	0	0	0	0	0.4484	0	0	0.8173	0	18.8008	0	0	0	0	0	0	0.617	0.5227	0	0	0
390539	OR4N3P	non-coding	0	0	0	0	8.9888	0	0	0	0	0	0	0	0	0	0	0	0	0	0	0	0	0	0	0	0	0	1.8722	0	1.766	0	0	0	0	0	0	0	0	0	0	7.4576	0	0	0	1.0455	0	0	8.08
390756	OR3A4P	non-coding	0	0	0	0	3.3708	0	0	0	0	0	0	0	0	0	0	0	0	0	0	0	0	0	0	0	0	0	0	0	0	0	0	0	0	0	0	0	0	0	0	0	0	0	0	0	0	0	0
390858	OACYLP	non-coding	0	0	0	0	0	0	0	0	0	0	0	0	0	0	0	0	0	0	0	0	0.2599	0	0	0.2854	0	0	0.2675	0	0.4415	0	0.8969	0	0	0.4087	0	0	0	0	0	0	0	0	0	0	0	0	0.3848
391037	SKINT1L	non-coding	0	0.792	0	1.1132	5.618	0.8847	0.3366	0	0.9394	1.8282	0	1.113	0.8071	0.4308	1.1536	0	0	0	0	0	0	0	0	0	2.4405	0	2.1396	0.4	0	0	0	0	1.859	1.226	0.3599	0	0	0.5455	10.8352	0.3925	0	9.7087	0	0.5227	0	0.2871	0.3848
391051	UOX	non-coding	0	0	0.4433	0.7421	5.618	0	0	0	0.9394	0	0.551	0	3.2284	0	0	0	0	0	2.6549	0.2734	0.5199	1.3161	0.3122	0	0	0.2926	1.0698	1.2	0	0	0.8969	0	0	1.226	0.3599	0	0	2.7276	0	0	1.5337	0	0.617	0.5227	0	0	0.3848
391257	SUMO1P1	non-coding	0	0.396	1.3299	4.0816	4.4944	0.4423	0	0	0	0	2.2039	0	2.8249	1.2925	0	0	1.1182	1.0173	0	0	0.5199	0	0	0	0.6101	0.2926	0.8024	0.4	0	0	0.4484	0.9732	0.6197	0.4087	0.7197	0	1.6768	0.2728	13.6443	1.9625	9.5859	0	0	228.437	0.3413	0.5743	0.7695
391267	ANKRD20A11P	non-coding	0.3912	2.772	3.1032	0.7421	14.6067	0.4423	0	1.2716	2.3486	3.6563	2.2039	1.113	1.2107	0	2.3071	2.2381	0.7454	1.3564	1.7699	0.8201	3.3793	0.2632	0.3122	6.8503	1.2202	0.2926	2.6745	8.4	8.83	0.4016	0.4484	7.7859	4.9574	4.4953	0	4.0976	0.4192	1.9093	2.6085	0.785	0.3834	0.3596	3.085	10.9775	0.3413	2.5842	1.1543
391343	LOC391343	non-coding	0	0	0	0	23.5955	0	0	0.3179	0	0	0	1.113	0	0	0	0.373	0	0	0	0	0	1.8426	0	0	0	0	0.8024	0	0	16.8692	0.4484	0	0	0	0.3599	0.241	0	0.5455	0.602	0	0	0.3596	0	0	0	0	0
391518	VENTXP7	non-coding	0	0	0	0	1.1236	0	0	0	0	0	0	0	0	0	0	0	0	0	0	0	0	0	0	0	0	0	0	0	0	0	0	0	0	0	0	0	0	0	0	0	0	0	0	0	0	0.2871	0
391622	USP17L6P	non-coding	0	0	0	0	5.618	0	0	0	0	0	0	0	0	0	1.1536	0	0	0	0	0	0	0	0	0	0	0.2926	0	0	0	0	0	0	0	0	0	0	0	0	0	0	0	0	0	0	0.3413	0	0
391627	USP17L9P	non-coding	0	0	0	0	6.7416	0	0	0	0	0	0	0	0	0	0	0	0	0	0.885	0	0	0	0	0	0	0	0	0	0	1.2049	0	0	0	0.4087	0	0	0	0	0	0	0	0	0	0	0	0	0
391634	HSP90AB2P	non-coding	22.3005	24.5524	17.7325	118.367	67.4157	26.0975	81.4678	64.2136	75.1545	25.5941	122.865	45.6316	26.6344	29.2962	35.7603	77.5873	42.8625	41.7091	47.7876	16.6758	9.3579	33.9563	105.214	71.6426	52.1646	44.4802	62.851	48	55.1876	75.9112	39.9103	63.747	76.22	6.5386	30.9492	61.4643	15.9296	61.3703	36.1174	8.2426	37.5767	16.5408	17.276	49.6602	22.8698	19.5248	17.3144
391714	TRIM75P	non-coding	0	0	0	0	11.236	0	0	0	0.4697	0	0.551	0	0.8071	0.4308	0	0	0	0	0	0	0	0.2632	0	0	0.3051	0	0.8024	0	0	0.4016	0	0	0	0.4087	0	0	0	0.2728	0	0	0	0	0	0	0	0	0
392196	LOC392196	non-coding	0	0	0	0	11.236	0	0	0	0	0	0	0	0	0	0	0	0	0.3391	0	0	0	0	0	0	0	0	0	0	0	5.6231	0	0	0	0	0	0.4821	0	0.2728	0.2007	0	0	0.3596	0	0	0	0.2871	0
392360	CTSL3P	non-coding	0	0	0.4433	0	0	0	0	0	0	0	0	0.5565	0	0	0	0	0	0	0	0	0	0	0	0	0	0.2926	0	0	0	0	0	0.4866	0	0	0	0	0	0	0	0	0	0	0	0	0	0	0
399668	SMIM10L2A	non-coding	7.8247	60.985	50.5375	120.965	95.5056	26.0975	80.4578	43.2329	38.5167	95.064	41.8733	28.3806	50.8475	41.3593	35.7603	171.587	16.3996	70.1933	121.239	112.356	796.465	17.8994	69.31	465.249	25.6247	71.1098	94.9452	54.8	845.475	68.2799	53.3632	55.4745	84.2758	210.053	69.0958	36.3965	35.6319	125.468	165.137	24.7277	6.5184	180.87	3.702	7.3183	12.2882	109.396	99.2689
399669	ZNF321P	non-coding	57.1205	41.3669	10.1962	34.9647	70.7303	69.2337	38.1552	53.79	79.2504	75.1554	133.653	15.3589	122.68	51.8327	49.603	31.8518	175.785	42.0617	74.6726	30.6506	44.1929	43.622	47.6959	24.8409	26.6528	53.9791	103.915	21.2	62.4857	52.684	32.1345	1.4599	26.646	248.231	80.8925	68.2254	76.5793	63.2359	101.618	52.2029	10.2262	173.333	276.255	61.2441	57.6865	45.5445	138.438
399670	RPL13AP17	non-coding	0	0.396	0	9.6475	15.7303	3.981	0.6733	6.9936	4.6972	5.4845	0.551	2.2259	11.703	18.5255	1.1536	15.6667	0	42.3872	0.885	0.8201	6.2386	6.5807	0.6244	6.2794	10.677	0	0	6	4.8565	2.0082	0	0.4866	0	4.4953	42.4651	1.2052	2.9344	3.0003	3.2104	0	0	0	0	1.0455	0.3413	2.297	38.8611
399706	LINC00200	non-coding	1.1737	0	0	3.3395	17.9775	0	0	0	0	0	0	0	0	0	0	0	0	0.3391	8.8496	0	0	1.3161	0	0	0	0	0	0	0.883	761.121	0	0	0	0	0	0	0.4192	0.2728	0	0	0	0	34.5519	0	0	1.4356	0.3848
399717	GATA3-AS1	non-coding	0	0	1.7732	1.8553	14.6067	3.5386	1.3466	0.3179	2.3486	1.8282	1.6529	1.6694	2.4213	1.2925	3.4607	0	10.4361	0.3391	0	0.8201	0.2599	2.369	0	0	2.4405	0.5853	0	0.4	0.4415	8.4346	4.9327	0.4866	1.2393	17.1639	2.5191	5.5438	3.3536	1.6365	5.4176	2.7475	1.5337	0	4.936	0	1.024	3.4456	5.0019
399744	LINC00999	non-coding	36.7762	36.8286	52.7541	47.8664	271.91	99.9668	220.165	108.718	101.928	155.393	99.1736	52.3094	139.629	179.655	43.8352	76.0952	48.4532	86.8091	94.6903	59.8688	163.244	151.356	145.801	26.8303	59.7911	29.8486	190.158	112.4	77.7042	157.044	82.9596	44.7689	93.5709	146.71	81.3315	171.377	50.7231	115.103	137.647	54.1654	32.592	90.2553	31.4669	17.7731	148.142	97.3369	32.3201
399761	BMS1P5	non-coding	54.7731	23.7604	47.4343	56.0297	67.4157	23.0012	24.9116	30.1995	113.201	82.2669	68.3196	25.0417	71.025	43.5135	29.9925	27.6032	53.6713	35.2662	27.4336	20.503	57.9672	19.742	44.9579	35.964	28.6753	24.2885	120.086	49.2	30.9051	58.2388	42.1525	28.7105	34.0821	77.6461	52.9015	51.8228	34.7935	34.9129	21.2691	84.3882	47.1626	48.1841	137.591	102.457	47.7876	41.0595	25.3944
399815	LOC399815	non-coding	15.2582	10.2962	29.7019	9.6475	31.4607	5.308	23.9017	15.2587	12.2126	9.1408	19.8347	77.9076	8.4746	6.0316	29.9925	11.1905	15.2814	7.1211	31.8584	14.7622	28.0738	30.2711	11.5517	0.8563	31.7259	35.4086	23.5357	21.6	19.8675	14.0576	4.9327	27.2506	17.9706	22.0678	3.2389	42.1814	1.2576	15.2744	9.4306	18.4476	43.7117	18.6983	40.1049	50.7057	87.0417	8.3268	28.4725
399844	LINC01002	non-coding	516.432	285.917	128.56	229.314	347.191	349.884	93.5869	599.221	93.0037	131.627	127.273	282.137	103.713	61.1774	151.116	293.936	73.0526	313.327	215.929	465.555	296.595	148.46	549.797	492.079	71.3832	353.501	271.195	665.6	1310.82	716.538	324.215	789.294	2243.22	163.465	123.077	81.2293	91.8047	201.567	304.389	253.165	355.828	118.303	21.5949	308.939	14.3363	141.555	263.178
399959	MIR100HG	non-coding	106.025	223.744	151.169	216.698	128.09	111.91	82.1411	61.9884	269.617	272.395	159.78	61.2131	309.927	450.214	110.742	120.111	265.747	396.406	123.894	82.012	91.2399	122.664	53.6997	43.956	199.812	28.678	28.3498	40.4	115.232	81.9359	33.1839	18.9781	18.5902	17.9812	295.817	77.1317	342.486	57.8244	101.129	268.865	221.626	193.456	1243.25	269.211	320.86	226.545	297.807
400027	LINC00938	non-coding	183.881	140.978	148.066	156.586	179.775	166.759	165.629	112.215	206.675	142.596	511.295	99.6105	184.019	148.204	294.158	174.571	114.797	216.005	303.54	187.534	525.604	206.37	122.073	158.413	103.719	240.837	208.612	158.4	238.411	217.692	186.099	248.662	161.735	732.734	125.236	112.082	1043.39	289.94	166.541	179.374	156.825	391.945	122.783	477.261	139.949	137.535	425.933
400043	LOC400043	non-coding	26.9953	27.3245	84.2292	57.5139	125.843	49.0988	106.379	11.444	82.67	230.347	42.4242	57.3178	136.804	136.141	122.277	32.4524	44.3533	59.0031	59.292	132.039	134.65	44.7486	29.6597	9.7046	94.8725	30.7265	262.102	28.4	82.1192	1.6066	152.915	4.8662	10.5345	193.298	87.0895	63.6336	90.9663	29.4577	58.3898	399.176	27.6074	14.3833	451.643	108.73	147.459	135.812	145.441
400242	DICER1-AS1	non-coding	18.3881	40.7887	47.4343	36.7347	46.0674	51.3104	36.3575	20.027	48.8504	80.4388	61.157	13.9121	53.2688	30.1579	48.4495	29.4682	71.5617	20.685	53.0973	18.5894	53.0283	40.0105	66.5002	22.8343	12.8124	31.0191	73.5491	26.8	91.8322	119.289	115.695	37.4696	88.6135	58.0302	41.7454	40.0121	51.9807	31.6398	10.0326	19.6252	9.2025	390.147	29.6159	65.8651	98.9886	39.3367	37.7068
400322	HERC2P2	non-coding	230.047	688.656	422.919	1643.41	246.067	382.616	81.1311	346.499	702.695	1451.55	1153.17	362.827	1702.58	750.931	677.139	405.841	419.68	401.831	765.487	421.269	325.968	218.478	995.317	310.832	235.809	282.683	1288.31	445.2	1532.89	616.929	1355.16	358.637	402.788	1088.27	572.2	856.885	591.071	1206.95	417.156	899.225	1695.94	1120.1	832.948	1729.74	273.413	567.655	328.588
400500	BCAR4	non-coding	0	0.792	2.6599	0	2.2472	0	0.3366	0	0	0	0.551	0.5565	0	0	0	0	0	0	0	0.5467	0.2599	2.8955	0.3122	0.2854	0.9152	0	0	0	0	0.4016	0.4484	0.4866	0	0.4087	0	0.241	0.8384	0.5455	0.4013	0.3925	20.7055	0	0	0	0.6827	0.2871	0.3848
400508	CRYM-AS1	non-coding	13.6933	5.5441	7.093	9.2764	13.4831	1.7693	3.0298	6.9936	0.4697	0	6.0606	5.5648	10.8959	0.8617	1.1536	3.3571	8.1998	6.782	4.4248	1.9136	4.1591	1.8426	3.1221	1.998	2.1354	5.8527	8.5584	4.8	9.2715	3.6148	7.6233	9.7324	2.4787	1.6347	3.2389	6.749	5.0304	6.8189	3.0098	14.1301	8.0521	3.9554	4.319	14.114	4.7788	3.4456	8.08
400624	FLJ45079	non-coding	0	0	1.7732	0.3711	38.2022	0	0	0	0	1.8282	1.1019	0	0	1.2925	0	0.746	0	0.6782	0	0	0	0.2632	0	0.2854	0.9152	0	0.2675	0	0	0	0	0	0	0	0.3599	0.7231	0	0.2728	2.4078	0.785	0.3834	0	0	0	0	0	1.1543
400657	LINC00909	non-coding	125.978	201.171	138.313	97.9592	115.73	190.202	104.359	67.3925	310.482	177.331	204.408	66.778	118.24	171.9	132.659	118.246	230.339	200.407	149.558	183.434	391.474	237.431	356.541	191.523	200.727	263.662	403.316	123.2	245.916	113.264	182.96	170.803	136.948	337.965	173.459	101.958	127.437	287.758	192.425	215.877	68.2515	342.683	310.967	337.69	278.534	225.971	282.032
400696	LGALS17A	non-coding	1.9562	2.376	25.2688	9.2764	23.5955	0	2.3565	0	1.4091	23.766	1.6529	0.5565	1.6142	4.3083	2.3071	1.119	3.3545	1.6955	3.5398	50.3007	2.0795	0.5265	6.2441	0.8563	8.2365	2.6337	0.8024	2.8	2.649	6.828	41.704	1.4599	2.4787	0.4087	2.5191	6.9901	9.6416	0.5455	1.6052	5.495	30.6748	2.5171	4.319	7.3183	0.3413	151.892	5.0019
400709	SIGLEC16	non-coding	3.5211	2.772	11.0828	12.616	8.9888	3.0963	4.3764	4.1326	7.5155	16.4534	5.5096	1.6694	12.1065	6.4624	25.3783	9.6984	7.0816	4.0692	11.5044	4.6473	9.6179	6.3175	4.9953	11.4172	4.8809	2.0484	2.4071	0.8	5.7395	4.0165	2.6906	4.8662	2.4787	1.6347	9.7166	4.0976	1.2576	6.5462	3.4111	2.355	11.8865	3.2362	12.957	4.1819	6.8268	6.604	1.9238
400710	FLJ26850	non-coding	0.3912	0	0.8866	0.7421	8.9888	17.6932	2.3565	2.5431	2.8183	5.4845	0	0	0	6.0316	1.1536	13.4286	2.609	1.0173	0.885	0.5467	2.5994	4.2116	1.2488	0	1.5253	7.0232	0	0.4	9.713	1.6066	0.4484	12.6521	0.6197	3.2693	5.3981	3.6155	2.5152	1.3638	2.4078	1.1775	0.3834	1.7979	0	0	0	2.0099	4.6172
400752	LINC01144	non-coding	11.3459	32.4725	21.7223	20.0371	24.7191	14.1546	19.1887	5.0862	15.5006	16.4534	42.4242	15.5815	25.0202	9.4782	91.1312	31.3333	28.6992	11.1902	145.133	8.7479	17.4162	61.0687	13.1127	32.2535	28.9804	30.4338	134.795	14.4	27.8146	26.5087	25.5605	54.5012	14.8722	233.756	21.9523	11.0877	20.1216	50.1872	18.8613	7.8501	8.4356	112.549	28.9989	36.069	107.864	13.4951	55.4059
400759	GBP1P1	non-coding	100.548	39.9967	49.2076	181.818	67.4157	48.6564	18.5154	10.4903	56.3659	85.9232	95.3168	53.9789	33.8983	31.0195	109.588	24.619	35.4081	65.785	86.7257	106.889	51.9886	27.1124	43.0846	38.8183	71.9933	93.3499	18.7216	43.6	17.66	2.0082	52.0179	161.071	149.961	98.8966	34.188	53.9922	120.31	36.5494	69.6263	190.364	149.54	1.4383	201.758	91.4794	37.2061	171.99	42.7087
400794	LOC400794	non-coding	0.3912	0	0	0	8.9888	0	0.3366	0	0	3.6563	0	0.5565	1.6142	0.4308	0	1.8651	0	0.3391	0	0	0	1.8426	0	0.8563	1.2202	0	0.2675	0	0	0.8033	0.4484	0	0	0.4087	0.3599	0	0.8384	0.2728	0.2007	0	0	5.7533	19.1269	0	0.3413	0.2871	0
400798	C1orf220	non-coding	8.216	4.7521	21.6425	18.1818	14.6067	1.327	6.6655	0.9537	4.6972	3.6563	18.1818	5.5648	20.1776	6.0316	5.7678	9.3254	6.3362	14.9203	6.1062	9.2947	11.1775	3.6852	4.6831	9.9729	7.6264	2.9263	66.2691	10	12.362	20.0823	11.6592	11.6788	30.9837	93.5595	5.758	3.8566	2.096	8.7282	1.6052	5.495	2.684	24.0921	5.553	12.5457	12.2882	13.7822	7.6953
400804	C1orf140	non-coding	0	0	2.6599	1.4842	35.9551	0	0	0	0.4697	0	1.6529	0	1.2107	0.4308	0	0	0	0	0	0.2734	0.5199	1.3161	0	0	0.3051	0	0	0.4	0	0	0.4484	0	0	0.4087	0.7197	0.4821	0	0.2728	0.2007	0	0	12.2258	3.085	0.5227	0	1.4356	0.3848
400866	LINC00114	non-coding	0	0	0	0	0	0	0	0	0.4697	0	0	0	0	0	0	0	0.3727	0	0	0	0	0.2632	0	0	0	0	0	0	0	0	0	0	0	0	0	0.4821	0	0	0	0.3925	0	0.7192	0	0	0.6827	0.2871	0
400927	LOC400927	non-coding	24.0962	17.9945	26.5987	49.0686	48.3146	13.6415	7.5038	12.5217	20.0146	29.2505	47.7906	13.734	21.1421	15.8243	16.9573	23.1978	28.0097	36.1038	25.6637	20.7326	23.1349	21.8558	17.1683	12.1307	15.0484	22.7142	85.8518	27.152	27.2671	27.2035	80.3184	40.1752	62.5686	37.4459	25.677	28.5484	30.3039	33.1863	10.2333	21.5877	13.3704	32.7256	33.102	150.737	46.8831	14.0722	21.2082
400931	MIRLET7BHG	non-coding	5.8685	15.8403	52.3108	28.5714	47.191	17.6932	9.7627	13.9871	27.7132	14.6252	23.6915	9.4602	19.774	12.9248	4.6142	27.9762	14.9087	57.3076	8.8496	7.3811	4.679	3.422	30.5963	14.5569	8.2365	5.8527	46.2691	8.4	43.2671	36.5499	68.6099	23.3577	41.5182	19.2072	22.6721	33.263	8.384	13.3651	22.2724	44.3529	8.819	27.6879	12.957	35.5463	14.6776	16.3664	18.4686
400940	LOC400940	non-coding	0	0	0	0.7421	42.6966	0	0.3366	0	2.8183	0	0	0	5.6497	0.4308	0	0.373	0	0	0	0	0	0.2632	0	0.2854	2.4405	0	5.6165	0	0	1.2049	0	0	0	0.8173	0	0	0	0.5455	0	0	0	13.6641	0	0	4.4374	5.7426	4.2324
401010	NOC2LP2	non-coding	40.2973	19.8003	19.949	36.3636	92.1348	30.9632	54.1996	38.4646	42.2744	32.9068	77.686	54.5353	42.7764	26.2804	12.6891	36.9286	26.0902	23.0587	62.8319	22.69	20.5355	43.1693	52.763	53.3752	38.4371	19.0211	54.8275	51.6	35.3201	45.3861	56.0538	73.9659	39.0395	55.5783	28.7899	45.5559	23.4752	65.7344	73.84	41.9978	24.1564	25.5304	22.2119	38.16	44.3742	47.0892	35.3982
401082	LINC01205	non-coding	0	0	3.1032	0	6.7416	0	0	0	0	0	0	1.6694	0	0	0	0	0	0	4.4248	0	1.8196	5.2645	0	0	0	0	1.3373	6.8	0	1.2049	0	0	0	0	0	0	0	0	0	0	0	0	0	0	0	0	4.2324
401093	MBNL1-AS1	non-coding	72.766	144.538	53.5609	115.926	248.517	139.113	60.34	50.7097	265.948	41.9196	198.298	34.7691	214.5	35.3665	338.892	159.136	92.9556	145.941	250.77	147.57	250.192	33.0929	122.554	223.148	116.672	250.64	78.176	184.24	459.263	52.0655	92.4619	320.092	387.854	148.161	94.8988	84.0928	88.3798	486.955	147.933	21.8664	53.6196	31.8087	19.3799	85.4365	37.0047	73.7664	250.677
401105	FLJ42393	non-coding	4.6948	11.8802	0.8866	0	15.7303	0	0.3366	0.3179	0.9394	1.8282	0.551	7.7908	0.8071	11.2015	0	0.373	0	0	0.885	0	0.2599	0.5265	0.3122	0.5709	0.3051	0.2926	0.5349	0.4	2.649	0.4016	0	0.4866	0.6197	2.0433	4.3185	0	0	0.5455	0.4013	0.785	0	0	0	0	1.024	0	0.7695
401127	LOC401127	non-coding	3.5211	2.376	5.3197	5.1948	14.6067	2.654	4.3764	3.1789	7.5155	7.3126	7.7135	6.1213	17.7563	1.7233	3.4607	1.4921	4.4726	2.0346	10.6195	3.0071	7.7983	5.2645	14.986	5.1377	2.7455	4.0969	8.291	2	2.2075	2.4099	9.417	5.8394	3.718	3.678	5.0382	5.5438	3.7728	34.6401	3.8124	3.14	3.4509	2.5171	1.234	4.1819	3.0721	3.7327	8.8496
401135	SYT14P1	non-coding	2.9617	1.683	0	2.5974	9.3708	0	0	5.1593	0.4697	0	1.2672	0	0	0	0	1.7121	1.1182	0	0	0	1.3829	0.2632	0	0	0	1.2437	1.348	7.724	1.3598	0.8194	0	0	0.7002	1.3241	0.8421	1.9717	4.2423	0.5455	0.602	2.355	0.7669	0	0	0.5698	0	0	1.6776
401136	TMPRSS11BNL	non-coding	16.0407	3.9601	0	23.7477	23.5955	2.2117	0	23.8417	0	0	10.4683	0	0	0	0	15.2936	0	100.034	8.8496	0	0	0	0.6244	0.2854	0	24.8738	0	142.8	1.3245	0	0.4484	18.4915	21.0689	2.8606	0.3599	10.6056	8.384	0.2728	0	0.785	2.3006	0	0	0.5227	0	1.4356	10.0038
401172	FLJ33360	non-coding	0.3912	2.772	1.3299	3.7106	28.0899	0.4423	0	0.9537	1.8789	0	1.1019	10.0167	5.6497	2.585	4.6142	11.1905	0.3727	2.0346	15.9292	3.8272	2.5994	1.0529	2.1855	0.5709	0.6101	1.4632	4.0118	5.6	3.532	0.8033	0	2.4331	28.505	8.5819	1.0796	22.4164	1.2576	12.8196	6.8222	1.1775	0.3834	5.7533	0	7.3183	2.3894	3.7327	5.0019
401232	LINC01011	non-coding	37.1674	16.2363	39.898	31.9109	30.3371	42.9061	19.5253	25.4311	35.6984	53.0165	47.3829	12.7991	43.9871	33.6045	29.9925	17.9048	140.142	20.3459	23.0088	30.8912	11.1775	28.4285	40.2747	31.968	26.5399	21.6548	84.782	24.4	49.4481	89.9689	20.6278	44.7689	23.5476	46.5877	26.6307	20.006	11.3184	12.8196	15.6509	11.7751	67.8681	243.438	24.6799	146.89	88.0657	63.1685	21.9315
401237	CASC15	non-coding	15.6495	26.1364	25.7121	19.295	23.5955	9.289	7.0695	34.332	6.576	20.1097	8.2645	12.621	16.5456	10.3398	145.348	19.3968	24.2266	13.5504	15.9292	10.1148	19.4957	32.8429	17.4836	40.5309	58.5342	8.4864	328.697	2.8	34.8786	195.2	19.2825	9.2457	32.2231	44.953	19.7931	4.0976	24.3136	185.475	113.774	10.9901	9.9693	3.9554	11.106	176.686	51.9281	20.0991	29.242
401253	LINC00336	non-coding	0	0.396	0	0.7421	14.6067	1.7693	0	0.3179	0.4697	1.8282	1.1019	0	1.6142	1.2925	0	0	0	1.3564	0	0.5467	0.5199	1.3161	0.3122	0.5709	0.3051	0	1.3373	0	1.766	17.6725	0	0	0	0.4087	0	10.15	0.8384	1.6365	0	0	0	4.315	0.617	0.5227	0.3413	0	0.3848
401288	LINC00242	non-coding	1.9562	10.2724	7.9796	5.9369	34.2022	20.334	13.4657	7.3115	10.8035	12.7971	15.3719	2.7824	14.4754	18.5083	8.0749	9.3254	10.6858	10.9766	10.5752	5.0875	3.0465	8.4233	19.2757	8.266	9.6733	2.3411	33.4234	6	4.3885	4.4181	6.278	2.4331	9.227	6.13	18.6343	3.1335	17.8244	14.4425	4.8157	6.6726	18.6465	36.3323	34.4779	46.5238	12.1381	25.1841	33.7861
401303	ZNF815P	non-coding	36.385	8.7121	14.186	22.6345	47.191	40.2521	15.149	9.8546	28.1829	29.2505	24.7934	38.9538	28.2486	34.8969	23.0712	26.8571	23.1085	35.6053	20.354	32.5314	36.392	73.9668	23.7278	20.5509	25.6247	19.6064	47.3389	32.8	37.5276	29.3202	7.6233	29.1971	27.2657	29.8324	28.43	59.0539	17.1872	26.1847	28.2919	12.5601	32.9755	119.022	48.1259	76.8427	29.0139	40.7724	65.7945
401331	RASA4CP	non-coding	47.1674	59.1317	30.8102	138.089	149.562	122.964	57.1857	106.21	89.2178	152.614	122.815	41.547	107.006	195.337	77.0116	116.206	78.7365	135.12	91.7965	74.4915	76.0931	115.375	96.6563	67.5981	67.5334	32.7134	109.799	55.844	67.2627	145.822	78.3991	27.0462	95.4671	126.772	81.2524	293.741	38.4196	121.022	69.9152	51.414	36.6986	388.928	84.5164	70.2248	70.3877	90.9569	104.017
401375	GTF2IRD2P1	non-coding	122.066	129.098	153.386	112.43	125.843	182.683	263.929	47.0476	257.874	237.66	188.43	34.5019	215.496	171.038	159.191	109.667	204.622	127.84	86.7257	115.637	179.62	181.1	186.076	92.4789	95.7877	166.508	293.127	98.4	165.563	136.962	313.453	98.7835	136.328	300.368	150.427	66.7671	113.184	166.109	141.259	63.5855	59.816	584.682	59.8488	276.006	205.145	165.674	213.928
401397	LINC00998	non-coding	1097.42	569.458	838.745	776.623	403.371	1093.44	410.032	628.467	676.391	636.197	484.298	590.985	441.082	689.753	1070.5	546.841	1341.78	430.315	830.973	434.937	596.829	1086.87	388.698	359.355	471.007	917.404	924.579	642	366.887	516.919	830.942	469.586	1055.93	1290.56	857.22	672.251	2324.46	845	1403.56	413.306	805.598	1195.97	426.963	2194.46	1488.93	555.308	1011.93
401431	ATP6V0E2-AS1	non-coding	26.2246	26.9285	15.5159	18.1818	29.2472	8.8599	13.8226	6.3832	10.3337	32.9616	11.6088	13.3723	28.6764	20.3049	37.0062	8.9524	26.1126	10.5324	15.0442	29.2947	26.2698	86.7518	13.4905	40.2712	17.9983	8.2025	127.767	15.208	66.3091	6.836	17.5112	23.4209	15.4981	9.8161	16.2195	4.3411	5.0388	27.0247	5.217	6.2801	23.0215	297.738	6.17	5.7501	94.3737	26.9988	28.1147
401463	LOC401463	non-coding	1.5649	5.1481	3.9898	5.1948	13.4831	27.8669	0.3366	0.6358	1.8789	0	5.0028	1.6694	8.8781	12.494	1.1536	1.4921	2.609	2.7128	2.6549	0.5467	0	1.5794	0.3122	1.1417	3.6607	0.8779	0.5349	4	0.4415	0.4016	0	0.9732	0.6197	0.4087	7.9172	0.7231	6.7072	5.7279	2.2072	1.57	2.3006	0	1.234	0	0.6827	5.7426	2.6933
401491	VLDLR-AS1	non-coding	8.9984	4.3561	18.6191	17.4397	14.6067	24.3282	8.4161	7.9472	3.288	11.1517	17.0799	3.3389	4.8547	4.3083	10.382	4.4762	26.0902	7.4602	6.1947	6.8343	40.2911	14.7407	10.9335	5.7086	5.186	6.1453	773.231	7.6	4.8565	6.828	8.0717	4.8662	8.6754	2.452	9.3567	3.8566	15.5104	25.9119	5.6183	6.6726	2.3006	92.1179	0	203.643	52.5664	11.7723	5.7715
401507	FAM74A1	non-coding	0	0	0	0	2.2472	0	0	0	0	0	0	0	0	0	0	0.373	0	0	0	0	0	0.2632	0	0	0.3051	0.2926	0	0	0	0	0	0	0	0	0	0	0	0	0	0	0	0	0	0	0	0	0
401508	FAM74A4	non-coding	0	0	0	0	0	0	0	0.3179	0	1.8282	0	0	0	0	0	0	0	0	0	0	0.2599	0	0	0	0	0	0	0	0	0	0	0	0	0	0	0	0	0	0	0	0	0	0	0	0	0	0
401588	ZNF674-AS1	non-coding	34.0376	93.0616	104.621	73.8404	38.2022	46.4448	42.7537	53.7233	72.3362	47.532	80.4408	70.1169	92.8168	49.545	349.528	62.6666	79.7615	50.8647	95.5752	62.0558	103.717	63.9642	44.6456	91.0518	43.318	78.4256	206.472	116.4	101.987	131.339	117.04	72.5061	103.486	83.3674	51.8219	73.7572	78.3903	97.9197	81.4648	93.4158	64.0337	435.455	131.421	477.784	175.79	69.4853	75.4136
401629	FAM224B	non-coding	0.3912	61.777	0.4433	0	0	0	628.85	0	4.6972	7.3126	1.6529	0	3.2284	0	0	0	32.0537	10.8511	0	0.5467	28.3338	0.2632	1.8732	0	28.6753	0	0	0.4	0	2.8115	0	26.764	0	0	5.3981	1.6873	0.4192	0	0	4.3175	46.0123	0	1.851	115.003	0	23.5446	0
401634	GOLGA2P3Y	non-coding	0	0	0	0	1.1236	0	0	0	0	0	0	0	0	0	0	0	0	0	0	0	0	0	0	0	0	0	0	0	0	0	0	0	0.6197	0	0	0	0	0	0	0	0	0	0	0	0	0	0
401827	MSLNL	non-coding	0.3912	0	0	0.3711	5.618	0.4423	0	0	1.8789	5.4845	6.0606	0	1.6142	0.4308	0	0	1.8636	0	0	0.8201	0.2599	0	0.3122	0	0.6101	0.2926	2.4071	9.2	0.883	3.2132	0.4484	0	0	0.8173	0	1.9283	0	0.5455	0.8026	0	0	0	0	0.5227	0	2.0099	0.7695
401884	MGC57346	non-coding	247.261	298.193	450.232	174.942	365.045	145.527	361.219	339.229	283.201	111.517	203.857	216.472	268.765	131.402	460.27	213.667	233.694	598.03	344.248	325.861	510.788	153.109	235.336	249.847	239.085	357.331	256.486	408.772	535.448	298.576	121	484.671	396.387	343.686	243.275	427.271	229.721	383.319	326.26	421.368	236.756	540.093	166.114	295.348	415.046	249.516	356.291
401898	ZNF833P	non-coding	10.5634	16.2363	4.4331	8.9054	32.5843	8.8466	8.0794	10.8082	10.3337	9.1408	28.6501	7.2343	22.1953	17.2331	25.3783	11.5635	24.972	11.8684	26.5487	14.2154	32.7528	6.0542	17.1714	18.2674	26.845	22.5327	34.2338	10.8	28.2561	6.828	5.3812	40.8759	59.4888	36.3711	8.637	157.156	25.9904	10.6375	17.858	43.1754	9.5859	14.3833	41.9559	28.7507	15.019	11.7723	9.6191
402176	RPL21P44	non-coding	0.3912	2.376	1.3299	2.9685	17.9775	0.4423	1.3466	1.9073	5.6366	0	5.5096	0	4.0355	1.2925	1.1536	3.3571	0	3.391	0	0.5467	0.5199	0.5265	0.6244	0.8563	0	0.5853	2.942	0.4	3.0905	3.2132	4.4843	2.9197	2.4787	2.452	0.7197	1.2052	0.4192	1.3638	0.602	2.7475	0	0.3596	1.234	1.5682	0.3413	1.7228	1.9238
402483	LINC01000	non-coding	493.349	541.341	757.619	1401.11	767.416	344.134	292.543	850.354	1098.66	1140.77	912.948	466.889	1545.2	840.543	471.806	704.627	224.748	773.822	461.947	541.826	713.543	540.405	335.623	378.764	410.606	217.719	1738.17	931.2	1103.75	1661.21	1190.58	984.915	1417.2	1051.49	485.11	738.054	320.688	859.184	538.952	489.844	398.773	661.273	501.62	428.123	391.517	544.397	424.779
402644	LOC402644	non-coding	0	0	0	0.3711	1.1236	0	0	0	0.4697	0	0	0	0	0	0	0	0	0	0	0	0	0	0	0	0	0	0	0	0	0	0.4484	0	0.6197	0	0	0	0	0	0	0	0	0	0	0	0	0	0
403315	FAM92A1P2	non-coding	0	0	0	0	16.8539	0	0	0	0	0	0	0	0	0	0	0	0	0	0	0	0	0	0	0	0	0	0	0	0	0	0	0	0	0	0	0	0.4192	0	0	0.3925	0	0	0	0	0	0.2871	0
404201	WDFY3-AS2	non-coding	15.6495	10.6922	7.9796	11.1317	24.7191	7.962	5.7229	10.8082	20.1978	7.3126	7.7135	2.2259	22.5989	31.8812	8.0749	9.6984	5.218	12.2075	6.1947	9.5681	40.0312	28.955	7.493	15.1277	7.0163	16.0948	19.5239	25.6	13.245	19.279	8.0717	6.8127	0.6197	7.3559	22.6721	30.8527	17.1872	30.5488	8.0261	6.2801	8.819	68.3207	7.404	9.932	26.2832	10.6238	18.0839
404744	NPSR1-AS1	non-coding	0	0	0	10.7607	6.7416	0.4423	0	0.3179	0	0	0.551	3.8954	0	0.4308	0	1.119	0	1.3564	0	0	1.0398	0.2632	0	0.2854	0	2.9263	0	0	0	0	0.4484	1.9465	0.6197	1.226	0	0.9641	0	0.2728	0	0	0	0	3.702	0	1.024	0.5743	0.7695
404770	SPATA31B1P	non-coding	0	0	0	0	4.4944	0	0	0	0	0	0	0	0	0	0	0	0	0	0	0	0	0	0	0	0	0	0	0	0	0	0	0	0	0	0	0	0	0	0	0	0	0	0	0	0	0	0
407835	LOC407835	non-coding	68.4664	70.4892	66.4967	55.2876	134.832	49.0988	54.1996	83.287	64.8208	78.6106	116.804	111.297	51.251	68.0706	92.2847	64.9047	34.29	59.0031	110.62	70.257	74.3436	43.9589	67.1246	182.104	102.499	76.3772	28.8847	92	77.7042	74.3046	52.0179	110.462	59.4888	102.983	56.8601	178.126	59.9455	46.0959	72.6361	43.5679	46.0123	65.4441	35.7859	31.8871	61.0999	59.1487	68.4879
407975	MIR17HG	non-coding	13.6933	31.6805	66.4967	45.269	112.36	9.7313	19.862	104.903	67.1693	43.8757	16.5289	86.2549	71.025	18.9564	72.6742	13.0555	8.1998	51.5429	62.8319	16.9492	31.713	1.8426	9.3662	18.5529	17.6933	12.2906	82.1075	25.2	82.5607	307.26	130.045	183.455	131.371	15.1206	12.5956	45.3149	14.2528	114.285	11.6378	73.7906	82.0552	25.1708	95.6347	39.2054	26.2832	16.6535	53.4821
414235	PRR26	non-coding	1.1737	0.792	1.7732	0.3711	37.0787	10.1736	0.3366	1.2716	5.1669	93.2358	4.4077	0.5565	6.0533	4.3083	0	6.7143	1.8636	5.0865	2.6549	3.0071	1.8196	1.8426	0.6244	1.4271	1.5253	6.7306	25.4079	0	0.883	30.1235	0	0.4866	0	5.7213	1.0796	4.8207	3.7728	14.7289	3.8124	1.9625	2.3006	4.6746	41.3389	3.6592	1.024	16.3664	2.6933
414241	FAM35BP	non-coding	191.315	198.795	181.314	164.007	116.854	80.5043	235.314	174.521	228.751	142.596	138.843	196.439	169.895	252.034	114.202	129.063	219.158	129.196	115.929	124.658	121.653	99.7631	157.665	65.3632	100.058	147.194	128.109	110.8	105.077	201.225	113.901	154.744	193.339	138.128	178.498	223.441	212.953	81.5543	92.5006	168.776	216.258	89.1766	1006.32	198.118	268.976	150.743	120.816
414767	LINC00596	non-coding	0	0	0	0	0	0	0	0	0	0	0	0	0	0	0	0	0	0	0	0	0	0	0	0	0	0	0	0	0	0	0	0	0	0	0	0	0	0	0	0	0	0	0	0	0	0	0
414777	HCG18	non-coding	217.973	340.645	377.258	244.289	410.551	194.696	328.255	336.6	551.601	365.32	516.804	194.374	457.26	391.057	211.505	262.402	549.858	316.406	356.69	315.656	226.87	293.948	311.567	230.726	384.334	230.671	577.596	277.22	294.609	651.483	167.834	327.329	238.048	430.666	357.326	345.88	294.94	633.557	583.34	372.156	584.287	381.873	879.105	619.472	466.137	382.244	361.431
414926	LINC00593	non-coding	0	0	0	0	1.1236	0	0.3366	0	0	0	0	0.5565	0.8071	0.8617	0	0	0.3727	0.3391	0.885	0	0.2599	0.2632	0	0	0.3051	0	0	0.4	0	0	0	0	0	0	0.7197	0.241	0	2.1821	0	0	0.7669	0.3596	2.468	0	0	0	0.3848
415056	CNTFR-AS1	non-coding	0.3912	0	0	0.7421	5.618	0	0	0	0	0	0	0	0.4036	0	0	0	0	0.3391	0	0	0.2599	0	0	0	0	0	0	0	0	0.8033	0	0	0	0	0	1.4462	0	0	0.602	0	0	0	0	0	0	0	0.3848
425057	TTTY9B	non-coding	0	0	0	0	10.1124	0	0	0	0	0	0	0	0	0	0	0	0	0	0	0	0	0	0	0	0	0	0	0	0	0	0	0	0	0	0	0	0	0	0	0	0	0	0	0	0	0	0
432369	ATP5EP2	non-coding	42.2535	25.3444	37.2382	37.1058	12.3596	54.4067	29.9613	49.9086	43.6836	62.1572	119.559	49.527	20.9847	38.3436	16.1498	33.9444	57.0257	18.3113	31.8584	17.7693	8.0582	16.3201	25.9132	38.5329	29.2854	21.9475	24.3381	25.2	37.9691	37.7548	39.9103	34.0633	84.8954	9.8079	35.6275	44.5917	51.5615	19.9112	34.3115	34.1478	40.6442	42.4308	154.867	100.889	53.5904	48.2377	32.7049
439927	LINC01555	non-coding	0	0.396	0.8866	0.3711	23.5955	0.4423	0.6733	0	0.4697	0	0.551	0.5565	0.4036	0.4308	1.1536	0	0	0	0	0.2734	0.2599	1.3161	0.6244	0.2854	0.6101	0	0	2.4	0	1.2049	0	0	0	0	0	0	0.8384	1.091	0.2007	1.57	0	0	1.234	1.0455	0	0.8614	0.3848
439931	THAP7-AS1	non-coding	105.822	53.3342	37.7613	83.7996	86.7303	156.691	12.7925	28.4066	96.7849	31.9378	118.022	92.3038	24.5843	23.6955	52.8561	192.748	203.291	25.0933	115.177	72.9852	115.937	149.15	162.582	150.609	39.4438	175.966	39.2164	67.26	92.3444	53.411	69.6457	248.224	15.591	96.2607	26.5695	28.4303	119.094	63.9915	46.2162	25.0653	59.2715	216.404	54.4501	121.532	168.919	84.0658	73.4552
439934	LINC00575	non-coding	0	0	0	0	0	0	0	0	0	0	0	0	0	0	0	0	0	0	0	0	0	0	0	0	0	0	0	0	0	0	0	0	0	0	0	0	0	0	0.2007	0	0	0	0	0	0	0	0
439965	FAM35DP	non-coding	60.6416	63.3611	50.9808	52.6902	35.9551	23.8859	67.6654	51.4981	68.1088	47.532	47.9339	60.6566	47.2155	74.1022	40.3746	25.3651	61.1256	37.979	44.2478	35.5385	45.7499	29.4814	41.8358	17.1257	38.132	38.3349	33.6988	30	22.5166	46.1894	20.6278	30.1703	47.7149	49.0396	48.9429	67.2492	65.8143	25.6391	20.0652	62.8005	59.816	26.6091	294.925	38.6827	83.287	50.8219	34.6287
440040	LOC440040	non-coding	1.5649	0.792	0	0	11.236	11.5006	2.3565	0.3179	15.5006	0	9.9174	3.8954	5.2462	1.2925	1.1536	1.4921	0	1.3564	7.0796	0.2734	6.2386	2.1058	6.5564	32.5389	3.9657	1.4632	0	0.4	13.245	0	0	2.9197	6.8164	21.6592	4.3185	0.241	4.192	15.5471	5.0163	0	0	4.315	0	0	0	0	1.1543
440072	LINC00167	non-coding	1.5649	1.98	0	1.1132	11.236	2.2117	2.0199	0.3179	3.288	7.3126	2.2039	2.7824	0.8071	0	14.9963	4.8492	1.1182	0	7.9646	1.0935	1.5597	3.1587	0.9366	2.2834	0	2.938	4.5467	2	1.3245	0.4016	4.0359	1.4599	0.6197	4.0866	1.4395	1.6873	3.7728	1.6365	0.4013	0	1.5337	13.6641	3.702	2.6137	6.8268	0.5743	3.8476
440078	FAM66C	non-coding	1.1737	14.6522	21.279	4.4527	24.7191	7.962	157.886	2.5431	41.335	5.4845	9.3664	11.6861	63.3575	14.2173	32.2996	10.0714	21.2449	8.4774	4.4248	24.6036	142.969	11.582	25.9132	4.2814	41.7927	10.2422	63.1185	22	16.3355	5.6231	3.5874	1.4599	24.1673	55.1696	17.6338	13.498	10.8992	41.7318	20.2659	5.1025	105.445	152.104	9.255	13.5912	43.6915	15.505	27.703
440081	DDX12P	non-coding	187.402	166.323	166.242	103.896	167.416	86.6969	164.619	144.004	80.7911	168.19	218.182	250.974	195.722	67.2089	234.173	54.0873	89.4521	86.47	119.469	118.644	311.151	65.8068	91.4767	106.18	232.453	110.615	298.208	149.2	398.675	373.13	259.193	977.129	560.186	163.465	43.5448	211.871	88.4511	169.655	77.2511	107.938	167.178	11.5067	137.591	157.345	59.7345	57.4259	63.486
440101	FLJ12825	non-coding	0.3912	0	11.9694	4.0816	67.4157	2.654	1.0099	2.5431	5.1669	1.8282	3.3058	2.7824	10.0888	4.7391	0	0	1.1182	1.3564	1.7699	5.1941	8.0582	18.9524	0.3122	0.8563	0.3051	2.3411	52.6879	0	10.1545	3.2132	8.5202	3.8929	18.5902	6.5386	1.7994	2.8924	2.5152	1.3638	3.4111	18.0551	9.2025	1.7979	5.553	40.7737	4.4374	4.3069	3.4629
440173	LOC440173	non-coding	138.498	70.8852	1053.75	96.1039	94.382	497.18	232.621	15.5766	159.234	56.6728	130.578	126.878	255.044	3.8774	145.348	0.373	10.4361	78.6707	67.2566	51.941	234.208	391.945	526.694	0.5709	49.4191	412.027	286.708	184.4	151.876	166.282	256.054	344.526	232.998	261.953	25.9109	8.9183	110.249	134.469	37.7226	227.652	2.3006	2.1575	0.617	422.373	4.7788	372.407	168.911
440184	LINC00238	non-coding	0	0	0	0	0	0	0	0	0	0	0	0	0	0	0	0	0	0	0	0	0	0	0	0	0	0	0	0	0	0	0	0	0	0	0	0	0	0	0	0	0	0	0	0	0	0	0
440224	CXADRP3	non-coding	4.3036	1.584	0.8866	0.3711	13.4831	0	0.3366	0	0.4697	0	12.6722	1.113	0	1.2925	0	0.373	0.7454	3.0519	0	0.2734	1.0398	0.7897	1.8732	1.1417	0.3051	0.8779	3.7443	3.6	0	2.0082	2.2422	9.7324	0	4.4953	1.0796	0.7231	4.192	2.1821	0.602	0.785	0.3834	0	0	1.0455	4.7788	0.2871	1.9238
440225	NF1P2	non-coding	0	0	0	0	0	0	0	0	0	0	0	0	0	0	0	0	0	0	0	0	0	0	0	0	0	0	0.2675	0	0	0	0	0	0	0	0	0	0	0	0	0.3925	0	0	0	1.0455	0	0	6.541
440253	WHAMMP2	non-coding	3.9124	17.8203	48.7643	19.666	20.2247	11.0583	70.0219	6.9936	29.1224	25.5941	21.4876	3.3389	58.9185	14.2173	35.7603	9.6984	11.1815	12.8857	17.6991	25.9705	10.9176	9.213	17.7958	19.4092	26.845	9.0716	16.8494	24.4	50.7726	39.763	60.9865	1.4599	22.928	25.7458	25.1912	89.6656	15.5104	3.5458	27.2887	33.3628	41.0276	53.2183	8.638	15.1594	11.6056	19.2377	16.1601
440278	CATSPER2P1	non-coding	30.9781	11.9238	33.3503	13.4657	51.8764	21.8025	22.0199	32.5868	16.5246	12.8519	22.7163	22.3706	30	8.2202	12.7468	47.6528	27.7227	29.237	34.7345	30.9076	21.4869	59.3551	27.621	37.4311	30.9724	29.2106	58.7029	22.96	49.2848	35.8389	22.9552	24.073	10.584	18.9089	36.4444	48.834	56.9147	47.0751	27.0439	33.0174	24.2446	22.3445	48.311	21.5107	31.5091	20.2484	14.6826
440307	TTLL13P	non-coding	7.3513	2.4315	5.8473	9.7254	27.0225	9.0766	9.2139	6.6248	8.3328	6.7824	7.3939	3.389	10.2462	9.7065	3.0223	21.0269	7.7264	6.4395	3.3982	6.4133	2.5136	5.7489	8.9198	3.7677	4.0756	4.3105	13.7764	2.896	1.2494	19.9337	2.8475	9.7324	17.9644	3.3061	8.9285	2.8346	5.7724	3.584	5.3715	6.5862	11.8597	7.7886	6.4476	3.241	4.1131	5.1109	5.1751
440352	SNX29P2	non-coding	17.9969	19.6776	48.5914	20.7755	40.7303	2.3488	2.3363	31.3248	16.7642	44.1682	58.1102	13.4947	34.3382	41.9323	5.8947	15.1929	6.3362	34.6863	23.8938	9.7813	8.7419	10.6002	8.645	5.8199	28.6753	11.1698	22.9232	26.372	34.6887	19.8895	20.5605	18.5742	14.4508	15.9542	15.7193	23.06	12.5424	33.6064	14.8463	24.4255	9.4133	192.337	11.723	9.4093	11.9469	20.9863	13.3282
440354	SMG1P2	non-coding	218.466	160.814	129.5	96.026	94.382	111.52	83.7805	276.443	126.062	118.007	188.755	124.402	142.074	145.02	281.78	126.769	183.608	82.7501	165.142	163.335	144.234	55.5093	157.174	101.367	270.963	103.484	149.326	135.6	189.196	172.821	231.045	159.002	64.1363	156.355	129.609	243.068	468.996	710.15	128.608	208.294	155.253	85.2859	243.548	648.259	153.03	76.5889	153.521
440356	CDIPT-AS1	non-coding	7.8247	0.396	3.5465	2.5974	6.7416	21.6742	1.3466	30.8353	2.3486	3.6563	9.3664	12.2426	11.703	6.4624	16.1498	2.2381	30.9355	0.6782	23.0088	3.8272	0.7798	46.8544	0.3122	19.98	25.0146	6.7306	1.8722	0	3.532	0	0.4484	0	3.718	11.4426	2.5191	71.1058	93.4815	135.56	61.6002	12.5601	1.9172	39.1945	17.276	1.0455	49.8356	4.3069	0.7695
440359	YBX3P1	non-coding	124.804	82.3694	128.117	28.9425	216.854	57.0607	256.522	121.752	136.687	42.0475	233.609	157.485	66.1824	44.3751	121.124	92.1349	82.3705	71.2106	63.7168	68.3434	151.807	49.4867	118.639	94.1915	82.3652	107.104	46.0016	94	67.1082	29.7219	134.529	166.91	86.1348	82.5501	75.9334	125.098	129.952	56.7334	69.225	43.5679	57.8988	2.5171	12.34	54.3649	18.4324	45.3664	71.566
440423	SUZ12P1	non-coding	135.759	133.454	347.113	222.635	141.573	54.8491	88.8739	137.01	181.31	210.238	141.598	191.987	135.997	107.707	185.723	88.0317	99.5155	107.155	120.354	87.4795	142.969	96.0779	73.6809	79.0638	110.125	123.198	252.741	166.8	265.342	301.235	82.0628	521.168	496.979	145.076	90.6883	243.688	98.0926	211.932	112.967	81.6407	254.985	454.872	281.351	453.215	297.307	108.822	146.595
440452	TBC1D3P2	non-coding	0	0	0	0	3.3708	0	0	0.3179	0	1.8282	0	0	0.4036	0	0	0	0	0	0	0.5467	0	0	0	0	0.3051	0	0.2675	0	0.883	0	0	0.4866	0	0	0	0	0	0.2728	0	0	0	0.3596	0	0	0.3413	0	0
440456	PLEKHM1P1	non-coding	305.203	202.894	141.988	362.145	180.449	130.496	108.339	204.333	147.157	249.232	177.46	261.759	232.312	141.389	126.949	245.545	204.104	252.157	268.186	149.174	146.727	165.77	184.028	109.816	110.745	149.916	220.971	518.18	201.148	336.126	159.471	384.341	256.663	266.678	162.192	191.776	180.289	252.169	212.188	157.48	224.226	273.197	163.27	620.272	204.067	163.985	112.628
440461	LOC440461	non-coding	7.0423	3.1681	0	3.7106	5.618	11.0583	14.8123	3.4968	1.8789	0	12.1212	3.8954	34.3019	3.0158	3.4607	4.8492	9.3179	4.0692	4.4248	0.8201	0.7798	28.1653	27.162	0.2854	0.9152	4.6821	2.1396	1.6	1.3245	7.6313	3.5874	1.9465	1.859	2.8606	5.758	43.1455	7.9648	11.7285	57.1859	4.71	0	0	1.234	1.0455	5.4614	5.7426	3.4629
440465	BAIAP2-AS1	non-coding	174.883	180.579	254.461	296.475	405.618	345.461	872.917	239.371	540.173	535.649	320.661	204.786	749.395	670.366	158.038	618.833	236.303	642.591	626.549	381.356	621.783	758.884	154.855	403.026	320.919	257.224	178.657	561.6	647.682	593.634	250.673	371.776	390.395	531.671	488.709	508.346	157.619	728.806	547.58	267.295	247.699	828.838	95.0177	148.458	242.01	408.298	413.621
440508	CLEC4GP1	non-coding	0.3912	2.376	1.7732	4.4527	5.618	0	0	0.6358	4.6972	1.8282	1.1019	0	7.6675	5.6007	0	5.9683	2.2363	2.0346	0	0.2734	0	0.5265	1.561	1.7126	0	0	0.5349	0.4	3.9735	8.4346	0.8969	0.9732	1.2393	0.4087	2.1592	1.6873	1.2576	1.9093	1.2039	7.8501	10.7362	0	0	0	2.3894	1.4356	2.6933
440556	LINC00982	non-coding	0.7825	0.396	4.8764	5.5659	8.9888	7.962	1.0099	0.9537	17.8492	7.3126	1.6529	2.2259	8.071	2.1541	1.1536	2.9841	0	4.0692	0	3.2805	1.2997	1.8426	0	2.8543	3.6607	0.5853	0.8024	2	3.9735	22.0906	25.5605	0.4866	6.1967	2.0433	6.4777	0.9641	1.2576	0.5455	1.2039	1.1775	1.1503	7.9108	13.574	0.5227	8.1922	4.8812	8.8496
440799	P2RX6P	non-coding	0	0	0	0	0	0	0	0	0	0	0	0	0	0	0	0	0	0	0	0	0	0	0	0	0	0	0	0	0	0	0	0	0	0	0	0	0	0	0	0	0	0	0	0	0	0	0
440823	MIAT	non-coding	71.9875	826.628	446.415	953.458	255.652	61.9264	94.2973	596.996	323.404	2039.51	961.526	1215.92	307.357	464.862	370.292	4780.26	43.3284	2999.66	307	645.708	1481.64	132.998	298.064	1430.4	221.471	72.93	561.648	647.136	4124.1	111.256	642.408	288.565	570.101	82.2436	246.942	252.312	104.527	876.002	109.526	274.752	141.91	97.3499	705.229	132.253	241.358	1169.22	211.089
440888	ACTR3BP2	non-coding	0	0	0	0	10.1124	0	0	0	0	0	0	0	0	0	0	0	0	0	0	0	0	0	0	0	0	0	0	0	0	0	0	0	0	0	0	0	0	0	0	0	0	0	0	0	0	0	0
440896	LOC440896	non-coding	0	0.396	0	8.9054	28.0899	0.8847	0	13.0335	0	21.9378	0	1.113	1.2107	3.4466	2.3071	1.8651	0	2.0346	0	0.8201	1.2997	0.2632	0	0	0.9152	0.2926	0.8024	0	3.0905	1.2049	1.7937	0.4866	0	0	0	11.8108	0	59.461	1.0033	0	1.5337	0.3596	0	1.5682	2.3894	0.5743	0.3848
440905	FAR2P1	non-coding	7.0423	10.2962	1179.65	103.896	86.5169	0	69.3486	1.2716	46.9716	32.9068	3.3058	90.1503	738.902	0.4308	24.2247	36.5555	2.2363	6.4429	278.761	9.5681	72.2641	72.3875	9.6784	42.2435	4.8809	3.8042	874.298	14.4	44.1501	21.2873	219.282	117.762	43.3772	140.58	16.1943	308.286	24.7328	32.7308	1.2039	908.252	14.5706	281.553	352.306	961.84	117.08	5.4555	242.786
440925	LINC01124	non-coding	0.3912	0	12.856	4.0816	16.8539	3.981	1.6832	0.6358	8.4549	25.5941	6.0606	0	10.4923	10.7707	0	6.7143	4.0999	5.4256	3.5398	15.5823	1.5597	14.4775	3.4343	3.7106	43.318	0.5853	4.2792	0.8	7.5055	55.0256	1.7937	0	0	2.8606	3.9586	0	10.0608	11.183	0.602	0	48.3129	79.1082	207.311	1.0455	829.798	21.8218	13.4667
440944	THUMPD3-AS1	non-coding	139.671	178.599	586.501	263.08	104.494	167.201	96.6167	152.587	160.173	327.24	197.245	179.188	326.473	248.156	293.004	102.206	130.078	165.48	187.611	272.007	178.841	67.3862	91.4767	142.429	198.287	101.836	231.345	165.2	421.192	322.121	315.247	237.956	439.969	252.145	164.103	108.707	143.366	127.923	98.1189	217.054	242.331	524.991	447.324	627.81	342.705	171.416	177.376
441032	EEF1A1P9	non-coding	13695.2	9006.78	4945.58	4072.36	5684.27	5837	7118.67	7980.61	6017.53	7341.86	4472.18	12000.6	5950.77	8601.45	6532.6	4677.62	7859.11	5020.01	6594.69	6328.32	5630.62	2717.29	8083.36	3423.43	7978.75	7264.91	3178.12	7153.6	5861.37	4612.11	2978.92	4791.73	5772.89	8268.08	7808.91	5768.24	9898.97	4708.33	4842.54	8987.93	5957.06	8211.08	14557.5	32461.6	9000.8	6746.39	5881.49
441046	GUSBP5	non-coding	8.6072	10.2962	6.2064	2.9685	32.5843	8.4043	16.8322	7.6293	32.8801	3.6563	9.3664	27.8242	25.0202	15.5098	39.221	8.9524	12.2997	15.9376	48.6726	15.5823	21.5753	16.8465	4.3709	1.998	8.5416	2.0484	13.64	3.6	32.2296	22.4922	4.4843	9.7324	4.9574	10.2166	14.395	6.0259	16.768	45.5504	19.062	19.2327	87.8067	2.1575	2.468	39.7282	22.8698	13.7822	53.0973
441089	CRSP8P	non-coding	311.424	338.982	303.668	161.039	197.753	187.106	164.955	184.376	122.596	107.861	139.945	328.325	151.332	154.236	403.746	120.111	208.349	143.439	254.867	221.706	218.092	143.985	351.858	355.074	223.606	183.188	141.214	136.4	171.744	168.692	384.753	187.348	115.26	190.437	204.409	98.8249	203.312	225.024	207.876	379.158	210.123	555.556	193.12	395.714	202.073	190.08	298.576
441094	NR2F1-AS1	non-coding	116.588	107.318	97.9718	128.386	132.584	138.45	43.427	51.1802	77.5031	129.799	88.7052	28.3806	63.7611	236.093	196.105	63.7857	181.886	80.3662	30.0885	40.1859	247.206	78.7049	127.381	78.4929	101.584	81.9372	14.1749	98	110.375	20.484	25.5605	85.1582	39.0395	19.6159	143.23	98.1018	144.205	204.295	89.0895	50.6329	123.85	25.89	23.4459	63.2514	71.3401	122.03	230.089
441108	C5orf56	non-coding	24.7418	34.8921	68.5759	84.3302	58.6742	50.01	23.9219	18.8031	53.1812	241.426	106.419	29.616	66.8241	86.4626	65.8336	34.8583	22.3668	78.2299	35.4425	83.7151	27.6215	29.2498	16.2535	17.4454	163.141	17.6224	50.3664	30.52	21.6821	23.7695	39.6906	39.6302	110.234	15.1778	56.9213	41.8391	58.3987	29.8614	63.3238	90.0991	93.934	99.7447	192.602	68.5363	62.8509	213.845	66.3024
441177	LINC00602	non-coding	0	0	0	0	13.764	0	0	0	0	0	1.2507	0	0.4318	0	0	0.4327	0	0	0	0	0	0	0	0	0	0.2926	0	0	0	41.2652	0	0	0.787	0	0	0	0	0	0.2307	0	0	10.4279	0	0	0	11.8039	0
441191	RNF216P1	non-coding	251.565	215.824	307.658	328.289	457.247	289.284	352.035	309.306	236.737	316.271	338.292	561.859	198.132	357.039	380.674	270.436	379.426	158.501	286.726	291.646	406.733	329.416	540.743	350.467	343.798	302.547	134.528	344.764	536.424	308.063	211.211	165.937	237.955	293.367	307.995	588.054	264.096	457.672	277.502	725.738	381.518	240.201	318.988	206.482	246.789	304.931	372.424
441194	PMS2CL	non-coding	118.153	81.9734	101.075	93.1354	265.168	105.275	32.9911	160.534	76.0939	162.706	177.961	101.836	116.223	97.7976	186.876	73.8571	113.306	87.1482	138.938	167.578	137.25	196.104	170.153	68.7884	85.1107	84.5709	239.636	152.4	168.212	123.306	152.018	145.499	63.8265	178.586	120.558	281.289	75.8751	191.202	116.779	166.029	91.2577	72.2762	67.2528	157.867	137.56	74.9408	108.503
441204	LOC441204	non-coding	4.6948	11.0882	10.6395	27.4583	28.0899	6.1926	6.0596	4.1326	29.5921	23.766	11.5702	2.7824	22.5989	9.0474	21.9176	15.2936	8.1998	10.1729	2.6549	7.9278	12.4773	23.4272	7.493	4.2814	12.8124	2.3411	41.7224	5.6	6.181	11.6478	8.0717	0.4866	1.859	13.8946	31.309	2.6514	7.1264	6.0006	8.4274	2.7475	6.135	306.005	4.319	3.6592	126.296	14.9307	8.08
441208	ZNRF2P1	non-coding	53.5994	48.3128	50.5375	20.4082	84.2697	49.5411	30.6346	41.3256	63.8813	21.9378	86.5014	61.2131	37.5303	90.9044	32.2996	50.7301	33.9173	54.5948	50.4425	71.3505	145.828	31.8505	55.2607	66.5049	22.2691	85.7415	59.9091	90	57.3951	32.935	45.2915	42.3358	26.0263	57.2129	46.0639	78.3368	53.2383	96.5559	41.9363	19.6252	28.3742	25.1708	6.17	11.5003	24.5765	32.1585	52.3278
441212	RP9P	non-coding	104.46	150.482	155.602	171.058	256.18	210.55	156.203	135.421	152.188	201.097	180.716	218.141	164.245	186.117	320.689	110.413	119.269	117.667	138.053	147.348	238.627	744.406	256.947	181.533	124.768	146.316	273.068	164.8	407.505	217.692	258.296	102.19	145.624	139.354	109.042	229.226	93.9006	130.65	283.521	237.072	176.764	233.01	137.591	150.549	257.37	121.456	171.989
441251	SPDYE7P	non-coding	7.4335	6.3361	9.7529	14.1002	67.4157	3.981	5.7229	6.6757	9.864	10.9689	13.7741	2.2259	12.5101	3.0158	10.382	6.3413	4.4726	16.9549	5.3097	4.374	9.3579	5.2645	4.6831	5.994	5.491	4.0969	27.5475	7.6	5.298	6.4263	5.3812	7.2993	17.3509	9.3993	5.758	14.7032	5.8688	6.0006	5.217	7.0651	1.9172	5.7533	3.085	6.2729	6.8268	4.8812	4.6172
441263	DTX2P1-UPK3BP1-PMS2P11	non-coding	165.16	52.1501	125.311	104.891	61.2247	102.984	15.1961	106.064	30.3624	43.5832	154.011	152.532	131.086	45.9907	115.056	139.541	43.7458	117.403	74.6372	85.7873	106.249	66.5201	79.9344	59.3492	68.7414	103.569	44.7178	155.552	166.481	46.8561	138.184	204.939	424.812	92.2599	43.3072	365.5	48.8912	128.782	46.162	46.5116	34.7163	6.4725	6.17	25.7658	19.4188	46.5896	68.7033
441295	OR2A9P	non-coding	149.061	249.484	374.155	212.245	177.528	121.641	90.2205	207.899	196.341	102.377	152.617	332.22	148.103	258.927	118.817	437.547	73.798	158.698	146.903	262.712	233.948	226.375	122.385	171.257	44.8433	131.685	64.9906	188.4	170.419	715.333	363.386	375.869	594.888	567.842	143.23	294.305	67.4911	112.921	217.106	61.2305	88.5736	16.5408	58.6148	32.4098	107.181	152.466	144.671
441317	FAM90A7P	non-coding	0.3912	0.396	0	0	11.236	0	0.3366	0	0	0	0	0	0	0	0	0	0	0	0	0	0	0	0.9366	0	0	0.2926	0.5349	0.8	0	0	0	0	0	0.4087	0	0.241	0	0.2728	0.2007	0	0	0	0	0.5227	0	0.2871	1.1543
441362	REXO1L6P	non-coding	0	0	0	0	1.1236	0	0	0	0	0	0	0	0	0	0	0	0	0	0	0	0	0	0	0	0	0	0	0	0	0	0	0	0	0	0	0	0	0	0	0	0	0	0	0	0	0	0
441394	SUGT1P1	non-coding	3.5211	1.584	3.1032	2.2263	16.8539	6.1926	13.4657	4.7683	3.288	7.3126	6.0606	2.7824	5.2462	1.2925	2.3071	2.9841	7.8271	13.903	8.8496	3.2805	9.3579	16.0569	15.2982	2.5689	5.186	0.5853	10.4306	0	8.83	8.0329	1.3453	1.4599	1.2393	26.1545	1.7994	4.3387	5.8688	19.093	7.0228	3.14	15.3374	1.4383	0	1.0455	12.6296	4.3069	28.0877
441432	AQP7P3	non-coding	0	0	3.1032	1.8553	0	0.4423	0	0	0.9394	0	0	0	0	0	0	0.373	1.4909	1.6955	0.885	0.8201	0	0	0	0	0	0.5853	0	0	0	0.8033	3.139	1.9465	1.2393	0	0	0	0	0.2728	0.2007	0.785	0	0.3596	0	0	0	0	0
441454	LOC441454	non-coding	1.5649	1.584	3.9898	4.0816	7.8652	0.8847	0	2.2252	11.2732	3.6563	5.5096	2.2259	4.4391	0	2.3071	2.2381	2.9817	6.4429	0.885	1.3669	4.419	0.7897	8.7418	1.4271	2.7455	4.0969	9.0933	1.6	2.2075	1.6066	5.8296	12.1655	3.718	5.3126	2.1592	3.8566	0	1.3638	1.0033	1.57	1.5337	7.5512	0.617	3.1364	1.3654	2.0099	1.1543
441455	LOC441455	non-coding	0.3912	3.5641	0	2.9685	15.7303	3.5386	0	9.5367	13.152	18.2815	3.3058	8.9037	9.2817	9.0474	3.4607	3.3571	2.2363	1.6955	11.5044	0.8201	5.4588	11.582	7.8052	3.4251	1.8303	3.8042	28.8847	3.2	4.8565	5.2214	5.8296	1.9465	34.7018	6.5386	2.1592	0.7231	7.9648	5.1824	0.8026	0	12.2699	27.6879	3.702	2.091	19.115	7.7525	10.3886
441502	RPS26P11	non-coding	1.5649	1.584	0.8866	0.7421	5.618	1.327	0	0.3179	1.8789	0	1.6529	2.2259	0.4036	1.2925	0	0.373	1.1182	2.0346	0.885	0	0.2599	0.2632	2.8099	0.2854	0.3051	1.1705	0.5349	0.4	0	1.2049	0.8969	2.9197	9.2951	0	0.3599	1.6873	0.4192	1.9093	1.6052	1.9625	2.3006	0.3596	1.851	5.2274	0.6827	1.7228	0
441543	TTTY6B	non-coding	0	0	0	0	0	0	0	0	0	0	0	0	0	0	0	0	0	0	0	0	0	0	0	0	0.9152	0	0	0	0	0	0	0	0	0	0	0	0	0	0	0	0	0	0	0	0	0	0
441601	LOC441601	non-coding	0	0	0.4433	0	0	0	0	0.3179	0	0	1.1019	0	0.8071	0	0	0.746	0	0.6782	0	0	0	0	0.9366	0.2854	0	0	0.2675	0	0.883	0.8033	0.8969	0.4866	0	0	0	0	0.8384	0	0	0	0	0	0	0	0.3413	0.5743	0
441666	LOC441666	non-coding	1.5649	11.8802	27.042	17.4397	64.0449	11.0583	27.2681	36.8751	33.8195	89.5795	53.9945	6.6778	109.362	38.7744	3.4607	20.8889	88.7067	17.6331	7.0796	8.2012	33.0127	8.16	14.6737	1.1417	88.1613	11.998	224.927	38.4	9.713	53.0174	2.6906	5.8394	94.1905	123.008	17.6338	41.2172	26.8288	45.0049	136.644	27.4752	3.0675	36.6775	126.485	38.6827	229.039	8.0396	30.0115
441818	WBP11P1	non-coding	15.2582	8.7121	17.2891	13.3581	47.191	4.8656	43.427	16.2123	11.7429	10.9689	41.8733	25.5982	8.8781	10.7707	48.4495	7.0873	14.536	14.5812	24.7788	18.8628	59.5269	12.1084	14.6737	15.4132	26.5399	17.558	28.8847	4.4	10.1545	7.2296	8.0717	17.5182	8.6754	13.8946	9.7166	26.514	11.3184	12.8196	14.0456	12.1676	13.0368	10.7875	3.702	4.7047	8.5335	10.3367	6.1562
441951	ZFAS1	non-coding	2703.05	2367.33	1524.99	2203.34	2067.42	2150.17	1934.69	1765.87	1406.33	2197.44	963.085	2668.34	2053.67	3020.09	1704.96	1136.21	4863.21	1084.77	1784.96	1967.47	629.582	2060.81	3462.38	2073.64	1190.94	2966.71	1332.71	1772.4	1490.51	1434.68	1632.29	1706.57	3952.29	910.503	2322.27	2333.23	4249	1095.12	1217.56	3347.27	2748.85	1862.28	10676.5	10010.5	1982.16	1536.72	1216.62
442229	SLC25A51P1	non-coding	0.3912	0	0.4433	0.3711	13.4831	0	0	0.3179	0.4697	0	0.551	0	0.4036	1.2925	0	0.373	0	1.0173	0	0.2734	0	10.2659	0	0.2854	0	0.2926	0.5349	1.2	0	0	0	0	0	0.4087	0.3599	0.4821	0.8384	0.8183	0.2007	1.57	0	0	4.319	0	0.3413	0	0
442245	GSTM2P1	non-coding	5.8685	7.1281	0.4433	1.1132	4.4944	0	0	0	2.3486	1.8282	0.551	1.113	1.6142	0	0	5.9683	0	0.3391	0	1.9136	1.0398	0.5265	8.4296	5.4231	0.3051	0.5853	0.8024	0.4	9.713	0.8033	27.8027	12.6521	4.9574	0	1.0796	0.7231	0.8384	0.5455	0.8026	0	0	0.7192	0	1.5682	0.3413	1.7228	1.1543
442308	TUBBP6	non-coding	0	1.188	0.4433	1.4842	14.6067	0	2.6931	1.2716	0	1.8282	13.7741	1.113	0.4036	0.4308	6.9214	0.746	1.1182	0.3391	1.7699	0	1.0398	3.6852	0.6244	4.8523	1.5253	0.5853	3.2094	0.4	0.4415	0.8033	5.8296	0.9732	2.4787	0.4087	0.3599	2.4104	0.4192	2.7276	2.2072	7.0651	0	0.3596	0.617	1.5682	24.2351	1.1485	0
442388	SDR16C6P	non-coding	0	0	0	0	0	0	0	0	0	0	0	0	0.4036	0	0	0	0	0	0	0	0.2599	0	0	0	0	0	0	0	0	0	0	0	0	0	0	0	0	0	0	0	0	0	0	0	0	0	0
442421	PTGER4P2-CDK2AP2P2	non-coding	6.651	4.3561	16.8458	5.1948	47.191	4.8656	6.0596	3.1789	7.0457	3.6563	4.4077	4.4519	4.4391	5.6007	5.7678	1.8651	4.0999	7.1211	7.0796	5.4675	5.4588	5.5278	9.9906	4.5669	2.7455	7.0232	30.7569	7.2	28.2561	0.4016	9.8655	0.9732	4.9574	14.7119	3.9586	5.5438	12.9952	21.5478	1.6052	6.2801	4.6012	49.2629	3.085	4.7047	98.9886	7.1782	3.4629
442454	UQCRBP1	non-coding	146.714	91.0815	138.313	123.191	139.326	213.204	129.945	154.176	141.854	162.706	182.92	199.777	142.857	137.434	125.738	93.2539	127.097	72.9061	164.602	101.421	50.169	85.2856	162.66	195.519	128.124	145.439	79.433	72.8	111.258	213.274	74.8879	147.445	221.224	95.2186	112.641	109.431	93.4815	87.0094	129.822	88.3132	85.1227	157.138	175.227	111.866	112.301	175.149	132.359
442459	XRCC6P5	non-coding	0	0.396	0.4433	0.7421	1.1236	0.4423	1.3466	1.5894	1.8789	0	4.4077	0.5565	0.4036	1.2925	1.1536	1.8651	0.3727	3.7301	1.7699	0.5467	0.5199	0	0.3122	0.2854	1.2202	0.2926	4.2792	0.4	1.3245	0.8033	3.5874	2.9197	4.3377	1.6347	1.4395	2.1693	1.2576	6.2734	1.0033	0.3925	0.3834	0	0	1.0455	0.3413	0.2871	2.3086
442523	DPY19L2P4	non-coding	0.3912	0	0.4433	1.1132	11.236	0	0	0.3179	4.2274	0	3.8567	0	0.8071	2.1541	0	1.4921	0.3727	0.6782	3.5398	0	6.7585	0.2632	0	0	2.7455	0.2926	2.942	0.4	0.4415	10.0412	0	0.4866	8.0558	2.0433	1.0796	2.1693	0	16.6382	2.0065	1.1775	1.1503	2.5171	1.851	6.2729	0.3413	4.8812	2.3086
442578	STAG3L3	non-coding	208.642	107.116	225.482	209.989	163.843	47.6081	196.018	121.278	155.57	282.687	208.43	298.464	230.96	124.371	227.251	106.436	108.204	112.408	174.513	123.371	159.288	90.3606	171.599	77.5282	114.03	116.687	206.555	131.828	173.479	164.876	578.874	287.46	250.993	222.428	112.324	183.908	120.289	210.901	111.252	111.365	61.0238	195.106	133.315	345.708	178.511	108.101	101.297
442582	STAG3L2	non-coding	162.754	40.7887	127.674	54.5455	50.5618	33.1748	39.0507	48.637	111.323	34.7349	72.7273	156.928	85.9564	43.9443	186.876	91.0158	50.6895	59.3421	33.6283	50.5741	50.6888	73.7036	94.2866	55.0878	118.362	96.5689	158.866	84	79.4702	34.14	278.027	72.5061	71.8823	191.255	85.2901	68.4544	124.502	93.8283	26.0848	132.666	63.6503	192.017	101.188	316.78	129.026	42.7823	49.2497
442720	EIF3IP1	non-coding	0.7825	1.188	0	0	8.9888	0	0.3366	0.6358	0	0	5.5096	0	0	0	0	1.4921	1.1182	0.3391	0.885	0	0	0	0.3122	0.2854	0.6101	0.2926	2.1396	0.8	0.4415	1.2049	0.4484	1.4599	4.3377	0	0.7197	0.4821	0.8384	0.2728	0.4013	0.3925	0.3834	0	0.617	1.5682	0.6827	0.5743	0.7695
449520	GGNBP1	non-coding	0	0	0	0	0	0.4423	0.3366	0	0	0	0	0	0	0	0	0	0	0	0	0	0	0	0	0	0	0	0.2675	0	0	0.4016	0	0	0	0	0	37.3341	0	3.5458	0	0	0	0	0	1.0455	0	0	0.3848
474148	TTTY3B	non-coding	0	0	0	0	0	0	0	0	0	0	0	0	0	0	0	0	0	0	0	0	0	0	0	0	0	0	0	0	0	0	0	0	0	0	0	0	0	0	0	0	0	0	0	0	0	0	0
474150	TTTY4C	non-coding	0	0	0	0	13.4831	0	0	0	0	0	0	0	0	0	0	0	0	0.6782	0	0	0	0	0	0	0	0	0	0	0	0	0	0	0	0	0	0	0	0	0	0	0	0	0	0	0	0	0
474151	TTTY17B	non-coding	0	0	0	0	0	0	0	0	0	0	0	0	0	0	0	0	0	0	0	0	0	0	0	0	0	0	0	0	0	0	0	0	0	0	0	0	0	0	0	0	0	0	0	0	0	0	0
474338	SUMO1P3	non-coding	161.189	331.458	278.4	165.492	143.82	186.221	127.925	147.819	160.173	126.143	146.006	189.204	104.923	115.462	161.498	122.722	218.412	153.272	108.85	171.952	123.213	125.033	117.078	123.876	179.068	231.765	309.976	194.8	249.007	270.308	225.56	129.927	352.595	217	144.669	69.9006	176.483	161.745	254.226	136.984	225.46	151.025	597.254	343.44	190.126	119.159	173.913
492303	GEMIN8P4	non-coding	56.338	90.2895	89.9922	16.6976	107.865	67.2343	25.9216	16.2123	62.9419	29.2505	114.601	62.3261	34.3019	15.5098	99.2061	47.746	71.5617	28.4842	81.4159	46.4735	72.2641	79.7578	97.4087	146.425	44.5382	141.049	66.3279	33.2	50.7726	13.656	60.9865	63.747	25.4067	36.7797	28.0702	52.787	76.7135	193.93	51.9689	45.1379	51.7638	47.1054	37.0199	143.753	80.8976	34.4555	41.1697
493754	GS1-124K5.11	non-coding	412.754	331.062	511.582	491.28	561.798	557.779	542.333	589.684	461.261	557.587	557.576	760.712	541.969	541.98	639.072	457.317	510.25	447.27	447.788	322.581	468.157	482.759	605.058	401.884	424.639	431.048	489.703	432.4	540.839	572.748	584.305	725.061	738.033	659.992	481.152	638.506	561.308	414.59	581.49	564.42	463.19	935.275	649.699	873.497	415.411	408.585	515.968
493812	HCG11	non-coding	151.8	146.126	95.7553	269.017	274.157	272.034	365.932	139.236	326.922	340.037	982.369	89.5938	385.391	272.713	69.2135	265.587	405.516	249.915	333.628	367.961	400.052	253.225	220.418	302.269	319.089	111.201	645.36	134.4	100.662	700.874	170.404	140.633	17.9706	705.762	200.09	60.5002	238.524	492.872	540.557	85.9582	136.12	48.5437	133.272	338.735	607.585	451.368	279.723
494141	LOC494141	non-coding	0	0.396	0	0.3711	30.3371	0	0	0	0	0	1.1019	0	0	0	0	0.373	0	0	0	0	0.2599	0.2632	0.3122	0.2854	0	0	0	0.4	0.4415	0.4016	0	0	0.6197	0	0.3599	0	0	0	0.2007	0	0	0.3596	1.234	0	0.3413	0.2871	0
497049	FLJ25758	non-coding	0	0	0	0.7421	3.3708	0	0	1.2716	0	0	0.551	0.5565	0	0	0	0.746	0	0	5.3097	0.2734	2.8594	0.2632	0	6.2794	0.6101	0.2926	0	0	0.4415	0	0	0.9732	0	0	0	0.4821	0	3.0003	0	0	0	0	0	0	0	0.2871	0
497258	BDNF-AS	non-coding	22.7034	41.3312	12.3462	29.8182	52.809	90.6204	24.2148	15.9708	52.2042	39.1042	67.124	61.9922	41.5658	39.1492	29.2312	33.84	64.249	41.9295	20.7257	33.439	29.2228	47.8731	77.5585	34.711	22.0312	53.5899	63.8968	34.408	28.7064	18.7529	134.206	62.2676	62.457	53.7434	61.6608	15.2046	35.0283	74.8663	27.2486	16.0809	4.5399	288.461	15.3879	27.1824	35.2502	30.4616	10.4002
497634	LINC00293	non-coding	0	0	0	0	14.6067	0	0	0	0.4697	1.8282	0	0	0	0	0	0	0	0	0	0	0	0	0.3122	0	0	0	0	0	0	0	0	0	0	0	0	0	0	0	0	0	0	0	0	0	0	0	0
503538	A1BG-AS1	non-coding	22.7387	66.4499	19.4702	83.0019	110.303	55.9593	120.478	36.4047	160.953	186.179	134.479	39.3322	174.512	236.774	80.8645	65.0166	34.4204	77.077	41.6991	74.5599	19.0434	170.3	57.2401	155.853	169.337	13.9352	32.1771	23.48	51.5011	28.7941	103.547	65.2701	41.5554	74.434	70.3482	149.995	113.808	103.23	167.041	166.629	48.2592	206.85	82.9554	122.368	114.305	141.486	217.003
503640	ARGFXP2	non-coding	0.3912	0	2.6599	0.7421	15.7303	0	0	0.3179	0.9394	1.8282	0.551	2.2259	3.2284	0.8617	1.1536	1.119	0	1.3564	0	0.8201	1.0398	0.7897	0	1.4271	0.3051	0	2.4071	2	1.3245	1.6066	0	0.4866	0	2.452	1.0796	2.1693	0	1.3638	0.602	2.355	0	0	0	1.0455	0.3413	0.2871	0.3848
503645	DPRXP4	non-coding	1.1737	1.188	5.3197	0.3711	4.4944	0.4423	0.3366	5.4041	2.8183	1.8282	2.2039	2.7824	8.071	0.4308	0	1.4921	0.7454	1.6955	4.4248	3.5539	1.0398	1.3161	0.9366	0.5709	1.2202	2.3411	3.4769	6.8	2.2075	5.2214	3.5874	5.3528	3.718	1.6347	1.4395	2.6514	2.096	1.091	3.0098	4.3175	8.0521	2.5171	0.617	1.0455	0.6827	3.1584	1.1543
503693	LOH12CR2	non-coding	22.6917	26.1364	17.7325	10.0186	28.0899	22.1166	80.4578	7.9472	23.9555	25.5941	23.1405	15.5815	11.703	18.5255	98.0525	23.873	31.681	10.8511	62.8319	12.3018	60.5667	45.8015	17.1714	19.1237	38.4371	28.9707	87.724	14.4	40.6181	6.0247	21.5247	8.7591	6.8164	42.501	27.7103	20.9702	60.7839	48.8235	26.6867	18.8402	13.4202	142.754	51.2109	117.616	175.449	15.2179	46.5564
541471	MIR4435-2HG	non-coding	509.39	367.098	258.451	223.377	222.472	165.432	192.897	372.566	118.368	221.207	132.782	113.522	109.362	211.967	557.169	237.611	1065.6	153.951	150.442	318.207	117.754	364.043	492.975	320.537	156.189	406.76	274.672	164	286.534	670.348	473.094	181.508	476.53	92.358	390.103	94.4863	871.515	43.6411	89.2902	613.09	743.098	81.6253	686.102	557.24	514.741	331.06	150.442
541473	LOC541473	non-coding	11.6041	17.6421	4.1228	5.2839	118.202	18.7195	2.3969	21.6514	6.9518	29.7075	5.146	41.1853	11.9492	11.2833	20.4987	24.1565	20.2684	4.0285	60.1593	2.7939	9.4853	7.0755	9.4661	102.064	1.5741	34.6009	6.1995	0	13.9956	3.4341	99.5381	14.073	20.5918	33.0159	6.7188	36.5821	74.5881	14.2815	29.841	6.9434	1.4801	4.4337	4.8249	3.2828	7.7245	5.0104	11.5044
550112	UBA6-AS1	non-coding	258.775	243.445	152.942	185.529	233.326	132.699	248.106	335.786	191.644	301.645	227.383	132.999	265.537	349.4	334.532	123.994	195.304	153.923	684.071	140.514	305.693	215.846	269.909	101.327	166.866	131.029	261.022	378.524	182.746	257.038	304.484	110.92	212.468	257.769	289.576	210.623	273.108	339.037	157.311	451.379	175.997	445.739	323.307	389.394	427.016	215.06	358.076
550643	LINC01420	non-coding	384.585	454.22	558.129	276.809	485.393	790.888	552.096	393.229	344.302	383.912	280.441	186.422	359.564	323.12	515.641	315.944	1082.37	189.895	477.876	319.574	257.343	303.238	580.706	208.363	238.249	543.712	303.022	503.2	403.532	453.459	672.646	253.528	49.574	171.23	601.35	380.838	390.694	310.125	428.192	140.516	374.617	652.643	188.185	294.302	537.269	455.1	151.597
553137	LOC553137	non-coding	0.3912	0	0	0	21.3483	0	0.3366	0.3179	0	12.7971	0	0	1.6142	0	0	0	2.609	0.3391	0.885	0	0	0	0.3122	0	4.8809	0	0.2675	0	0	0	0	0	0	0.4087	0	0	0.8384	0	0	0	0.7669	0	32.0839	0	0	0	0.3848
554202	MIR31HG	non-coding	11.3459	1.584	1.3299	6.308	23.5955	7.0773	40.0606	122.387	45.5624	27.4223	66.6667	4.4519	15.3349	23.6955	25.3783	36.5555	87.9612	25.7714	0.885	16.6758	8.3182	12.1084	49.0165	58.5129	1.8303	7.6085	23.0008	2.4	0	55.8289	181.166	9.7324	14.8722	0	114.08	62.4284	26.4096	17.7292	3.4111	254.342	873.85	0	2.468	20.9096	209.583	45.9407	16.5448
554203	JPX	non-coding	329.03	234.436	263.77	305.751	419.101	353.865	160.242	128.427	241.904	244.973	276.033	227.045	197.74	169.746	296.465	164.127	229.966	179.044	338.053	252.324	469.197	139.51	299.719	327.958	125.683	196.064	164.75	182.8	633.113	280.751	273.991	221.411	655.616	384.961	219.883	192.588	241.04	391.952	272.285	268.865	174.847	349.874	311.584	294.302	234.501	211.901	239.708
554226	ANKRD30BL	non-coding	14.867	0	0	0	8.9888	0	0.3366	0	0	0	0.551	0.5565	0	0	0	0.373	0	0	0	0	0.2599	1.0529	0	0	0	0	4.2792	0	0	0	0.4484	0.4866	0.6197	0.4087	0.3599	0.4821	0	0.8183	0	0	0	0	0	1.5682	0.3413	0	0
554236	DPY19L2P1	non-coding	33.6463	1.98	4.8764	7.7922	16.8539	34.5018	5.7229	13.0335	35.6984	1.8282	31.9559	57.8742	12.9136	0.4308	35.7603	2.9841	19.3813	4.4083	34.5133	8.7479	74.8635	8.16	28.0987	1.998	11.5921	32.4823	2.4071	1.6	3.9735	4.8198	10.3139	3.8929	19.2099	2.8606	3.5987	41.4583	3.3536	34.9129	21.6704	21.9802	3.0675	1.4383	1.234	4.7047	5.1201	6.8911	25.3944
572558	PGM5-AS1	non-coding	0.3912	0	0	0.3711	1.1236	0.8847	0	0	0.9394	0	0.551	0	0.8071	0	0	1.119	0	0.3391	0	0.2734	0	0.2632	0	0	0	0	0.2675	0	0.4415	0	0	0	0	0.4087	0.3599	0.241	0.8384	0.2728	0	0	0	1.7979	0	0	0	0.2871	0.7695
574029	DUSP5P1	non-coding	6.651	6.7321	5.3197	5.5659	32.5843	3.0963	5.7229	20.3449	19.7281	10.9689	15.427	2.7824	12.9136	32.7428	59.9851	5.2222	4.8453	13.5639	20.354	15.3089	10.6577	1.5794	102.716	21.6926	7.6264	10.2422	1.0698	17.6	7.5055	1.2049	36.3229	38.4428	47.0953	1.226	5.0382	151.612	7.5456	31.367	21.4698	7.0651	11.5031	0	1.234	7.8411	4.0961	13.4951	25.7791
574036	SERTAD4-AS1	non-coding	12.5196	68.1131	16.4025	15.9555	59.5506	151.72	23.9017	40.3719	13.152	27.4223	29.7521	42.8492	19.774	35.7586	24.2247	45.5079	74.1707	14.2421	12.3894	34.4451	31.1931	48.1706	62.1293	31.1117	14.0326	21.0696	33.4314	6.8	115.673	14.0576	68.6099	20.9246	47.7149	14.3032	51.1021	4.8207	72.5215	15.0016	8.628	8.2426	68.635	12.2258	2.468	230.005	3.0721	33.307	40.0154
574040	SNORA6	non-coding	0	0	0	0	0	0	0	0.3179	0.4697	0	1.1019	0	0	0	0	0	0.3727	0	0	0.5467	0	0	0	0	0	0	0	0	0	0	0	1.4599	0	0	0	0	0	0.2728	0	0	0	0.3596	1.234	1.0455	0	0	0
574042	SNORA10	non-coding	0	0	0	0	0	0	0	0	0	0	0	0	0	0	1.1536	0	0	0	0	0.5467	0	0	0	0	0	0	0	0	1.3245	0.8033	0	0	0	0	0	0	0	0	0.2007	0	0	0	1.234	0.5227	0	0	0
594840	ZFAT-AS1	non-coding	0	0	0	0	0.7978	0	0	0.3529	0	0	0	0.5899	0	0.461	0	0	0	0	0	0	0.2859	0	0	0.3083	0.6345	0	0	0	0	0	0	0	0	0	0	0	0	0	0	0	0	0.1654	0	0	0	0	0
594842	HAS2-AS1	non-coding	3.971	4.0907	6.8935	3.8961	11.236	5.538	4.0869	4.7938	6.7874	3.6563	5.0854	27.3344	7.3769	7.8583	26.7049	14.8721	13.3097	26.2326	6.1947	1.9738	1.2997	0.2659	5.3668	14.4027	38.3334	1.5012	1.2196	0.4	1.947	4.1289	17.2242	0.4866	19.4516	0.4291	5.7904	1.7234	16.659	6.9144	1.8901	20.2532	2.339	0.3596	0.617	2.4412	68.6571	7.5343	14.4863
595097	SNORD16	non-coding	0	0	0	0	0	0	0	0	0	0	0	0	0	0	0	0	0	0	0	0	0	0	0	0	0	0	0	0	0	0	0	0	0	0	0	0	0	0	0	0	0	0	0	0	0	0	0
595098	SNORD18A	non-coding	0	0	0	0	0	0	0	0	0	0	0	0	0	0	0	0	0	0	0	0	0	0	0	0	0	0	0	0	0	0	0	0	0	0	0	0	0	0	0	0	0	0	0	0	0	0	0
595099	SNORD18B	non-coding	0	0	0	0	0	0	0	0	0	0	0	0	0	0	0	0	0	0	0	0	0	0	0	0	0	0	0	0	0	0	0	0	0	0	0	0	0	0	0	0	0	0	0	0	0	0	0
595100	SNORD18C	non-coding	0	0	0	0	0	0	0	0	0	0	0	0	0	0	0	0	0	0	0	0	0	0	0	0	0	0	0	0	0	0	0	0	0	0	0	0	0	0	0	0	0	0	0	0	0	0	0
595101	SMG1P5	non-coding	79.0297	209.883	113.931	65.3061	86.5169	72.1	75.0715	144.004	46.5019	107.861	110.193	47.3011	200.161	51.2684	242.247	51.8492	156.914	45.7782	173.451	115.088	39.7713	87.3914	235.716	136.144	49.4191	169.727	175.159	144	100.658	38.53	185.202	103.65	60.1084	106.253	75.9334	73.2462	50.6141	324.581	107.549	324.6	87.4233	38.4754	340.583	441.715	167.939	60.8686	117.353
595135	PGM5P2	non-coding	0.7825	0.792	1.7732	0.3711	4.4944	1.7693	0.6733	0.9537	3.288	0	1.1019	1.113	2.8249	1.2925	1.1536	2.6111	1.1182	1.3564	0.885	2.187	0.7798	0.7897	1.2488	1.1417	1.2202	1.1705	1.3373	1.2	3.0905	2.0082	1.3453	0	0	2.452	0.7197	0.9641	1.2576	1.9093	0.8026	0.3925	0.3834	2.8767	1.234	2.6137	0	1.7228	1.5391
606293	KLKP1	non-coding	0.7825	0	0	0.7421	10.1124	0	0	0	0	0	0	0	0	1.2925	0	0	0	0.6782	0	0	0	0.5265	0	0	0.6101	0	0.2675	0.4	0	0	0	0	1.2393	0	1.4395	0	0	0	0	0	0	0	0	0	4.7788	0	0.3848
606500	SNORD68	non-coding	0	0	0	0	0	0	0	0	0	0	0	0	0	0	0	0	0	0	0	0	0	0	0	0	0	0	0	0	0	0	0	0	0	0	0	0	0	0	0	0	0	0	0	0	0	0	0
606551	UBE2MP1	non-coding	62.5978	102.962	73.5897	88.6827	100	177.817	159.232	77.8829	135.278	80.4388	169.146	61.7696	85.5529	82.2879	316.075	120.484	165.114	85.1136	99.115	89.1197	119.314	103.712	140.493	226.631	120.497	143.683	133.726	81.2	170.419	108.445	119.282	135.766	164.833	115.652	88.1691	152.094	121.568	75.8264	143.868	140.516	126.534	158.936	86.9968	82.07	108.888	137.822	126.202
606724	LOC606724	non-coding	5.4773	8.3161	15.5159	46.7532	20.2247	23.0012	12.1192	20.027	21.6069	96.8921	26.9972	18.3639	22.5989	31.8812	31.1461	38.0476	6.7089	75.2798	22.1239	30.6178	11.1775	18.6891	7.1808	9.99	31.1158	7.0232	20.8612	17.6	34.4371	15.2626	20.1794	18.9781	68.7839	4.904	29.5097	9.8825	21.3792	11.183	18.0587	18.4476	43.3282	32.3625	132.655	16.7277	15.7016	50.8219	16.1601
619190	FDPSP2	non-coding	13.302	3.1681	11.9694	20.4082	71.9101	2.2117	1.6832	24.1596	3.288	9.1408	14.3251	12.2426	12.9136	5.1699	19.6105	10.0714	1.1182	12.2075	2.6549	2.187	9.3579	5.5278	4.3709	5.4231	5.186	7.6085	5.8839	14.4	7.5055	3.6148	23.7668	15.5718	29.8683	12.2599	2.1592	36.1555	4.6112	4.6369	5.6183	13.7376	6.135	1.7979	6.17	4.7047	3.0721	4.3069	4.2324
619207	SCART1	non-coding	4.3036	13.8602	5.3197	20.7792	31.4607	5.308	1.3466	5.0862	30.5315	42.0475	16.5289	11.1297	31.8805	5.1699	3.4607	4.8492	7.4543	7.1211	3.5398	7.3811	7.5383	26.5859	11.2395	2.8543	5.491	5.56	10.1631	15.2	11.0375	14.4593	17.9372	34.5499	13.0132	51.9003	9.7166	44.5917	10.0608	25.6391	5.8189	10.9901	6.135	27.6879	30.8499	2.6137	6.1441	6.8911	5.7715
619351	LINC00589	non-coding	2.7387	1.188	0	1.1132	3.3708	4.4233	0.3366	0.3179	0.9394	5.4845	0.551	0.5565	0	1.7233	0	2.9841	4.4726	0	0	1.6402	0	1.0529	0.9366	0.2854	0.3051	2.0484	0.8024	0.8	0.4415	8.4346	0.4484	0	0	0	2.1592	0.241	0.8384	0	0	0.3925	0.3834	1.0787	0	0	1.3654	2.0099	0.7695
619383	SCARNA9	non-coding	0.3912	0.396	5.3197	13.7291	2.2472	1.7693	1.0099	3.4968	10.8035	12.7971	5.5096	0.5565	7.2639	4.7391	4.6142	2.2381	2.609	2.0346	0.885	1.0935	0.7798	0.7897	1.2488	1.998	2.1354	0.5853	5.0816	0.8	1.3245	2.0082	6.7265	2.9197	1.2393	12.2599	2.1592	7.9542	0.4192	4.6369	2.4078	1.1775	8.4356	2.1575	6.17	1.5682	3.4134	4.0198	0
619434	LINC00051	non-coding	1.1737	0	0	0	5.618	0	0.6733	0.3179	0	0	0.551	0	0	0	0	0	0	0	0.885	0	0	0	0	0	0	0.5853	0	0.4	0	0.4016	0	0	0	0	0	0	0	0	0	0.785	0	0	0	0	0	0	0
619498	SNORD74	non-coding	0	0	0	0	0	0	0	0	0	0	0	0	0	0	0	0	0	0	0	0	0	0	0	0	0	0	0	0	0	0	0	0	0	0	0	0	0	0	0	0	0	0	0	0	0	0	0
619499	SNORA27	non-coding	0	0	0	0	0	0	0.3366	0	0	0	0	0	0	0	0	0	0	0	0	0	0	0	0	0	0	0	0	0	0	0	0.8969	0.4866	0	0	0	0	0	0	0	0	0	0	0	0	0	0	0
619505	SNORA21	non-coding	0	0	0	0	0	0	0	0	0.4697	0	0	0	0	0	0	0	0	0	0	0	0	0	0	0	0	0	0.2675	0	0.4415	0.4016	0	0	0	0	0	0	0	0	0	0	0	0	0	0	0	0	0
619562	SNORA3A	non-coding	0	0	0	0	0	0	0	0	0	0	0	0.5565	0	0	0	0	0	0	0	0	0	0	0	0	0	0	0	0	0	0.4016	0	0.9732	0	0	0	0	0	0	0	0	0	0	0	0	0	0	0
619564	SNORD72	non-coding	0	0	0	0	0	0	0	0	0	0	0	0	0	0	0	0	0	0	0	0	0	0	0	0	0	0	0	0	0	0	0	0	0	0	0	0	0	0	0	0	0	0	0	0	0	0	0
619565	SNORA52	non-coding	0	0	0	0	0	0	0	0	0	0	0	0	0	0	0	0	0	0	0	0	0	0	0	0	0	0	0	0	0	0.8033	0.4484	0.4866	0	0	0	0	0	0	0	0	0	0	1.851	0	0	0	0
619567	SNORD2	non-coding	0	0	0	0	0	0	0	0	0	0	0	0	0	0	0	0	0	0	0	0	0	0	0	0	0	0	0	0	0	0	0	0	0	0	0	0	0	0	0	0	0	0	0	0	0	0	0
619568	SNORA4	non-coding	0	0	0	0	0	0	0	0	0	0	0	0	0	0	0	0	0	0.4951	0	0	0	0	0	0.097	0.2013	0	0	0	0	0.1767	0	0	0.756	0	0	0	0	0	0	0	0	0	0	0	0	0	0
619569	SNORA41	non-coding	0	0	0	0	0	0	0	0	0	0	0	0	0	0	0	0	0	0	0	0	0	0	0.3122	0	0	0	0	0	0	0.4016	0	0	0	0	0	0	0	0	0	0	0	0	0	0	0	0	0
619570	SNORD95	non-coding	0	0	0	0	0	0	0	0	0	0	0	0	0	0	0	0	0	0	0	0	0	0	0	0	0	0	0	0	0	0	0	0	0	0	0	0	0	0	0	0	0	0	0	0	0	0	0
619571	SNORD96A	non-coding	0	0	0	0	0	0	0	0	0	0	0	0	0	0	0	0	0	0	0	0	0	0	0	0	0	0	0	0	0	0	0	0	0	0	0	0	0	0	0	0	0	0	0	0	0	0	0
641298	SMG1P1	non-coding	57.7543	78.6667	128.609	77.2727	3.4494	4.9674	53.9303	37.7366	36.1399	59.2687	65.697	48.0968	96.8805	28.8654	31.8267	52.4684	17.0518	29.5693	64.3894	84.2892	90.7252	19.3893	51.2176	47.718	51.0481	43.3272	226.02	114.592	34.9757	86.6352	67.6368	32.6813	15.0891	145.452	82.7638	115.603	51.4735	114.435	72.4856	147.974	20.5483	34.1784	6.8425	8.6618	58.3691	15.7117	38.9996
641311	RPL31P11	non-coding	6.651	1.98	4.4331	2.2263	13.4831	1.327	2.0199	3.1789	3.7577	9.1408	16.5289	7.2343	3.2284	1.7233	2.3071	1.119	1.1182	2.7128	0.885	1.6402	1.2997	1.0529	2.1855	0.8563	2.1354	1.7558	2.1396	2.8	1.3245	3.2132	4.9327	19.4647	7.4361	0.8173	1.4395	3.1335	2.5152	2.7276	1.4046	3.5325	2.684	0.3596	20.3609	13.0685	2.048	2.297	4.2324
641367	LOC641367	non-coding	10.5634	3.5641	3.9898	9.6475	14.6067	4.4233	3.0298	8.583	4.6972	5.4845	12.6722	10.0167	11.2994	6.8932	4.6142	1.8651	7.8271	4.4083	3.5398	6.8343	3.8991	5.2645	2.1855	1.4271	4.8809	5.8527	5.349	6.8	9.2715	3.6148	4.0359	3.4063	1.859	8.9906	4.6784	5.7849	8.8032	4.0914	5.8189	5.8875	6.135	2.1575	4.319	6.7956	7.8508	3.1584	5.3867
641451	SNORA19	non-coding	0	0	0	0	0	0	0	0	0	0	0	0	0	0	0	0	0	0	0	0	0	0	0	0	0	0	0	0	0	0	0	0	0	0	0	0	0	0	0	0	0	0	0	0	0	0	0
641516	KC6	non-coding	34.0376	31.6805	19.0624	13.7291	23.5955	26.5399	7.0695	20.6628	60.5933	0	36.3636	28.9371	23.0024	0.4308	16.1498	27.6032	1.4909	7.7993	70.7965	16.129	112.035	120.032	44.3334	43.6706	14.9478	40.676	33.1639	26	37.9691	2.0082	22.87	77.8589	42.1379	194.115	11.8758	0.241	15.9296	97.6469	32.9069	22.7652	0.3834	0	1.234	64.2969	0	14.0693	13.8515
641517	DEFB109P1B	non-coding	0	0	0	0	0	0	0	0	0	0	0	0	0	0	0	0.746	0	0	0	0	0	0	0	0	0	0	0	0	0	0	0	0	0	0	0	0	0	0.2728	0	0	0	0	0	0	0	0	0
641638	SNHG6	non-coding	1038.73	804.289	866.674	751.391	1069.66	1700.32	1151.66	1594.53	520.915	1043.88	530.578	1118.53	751.009	1905.98	1793.78	470	1322.03	688.03	1235.4	810.005	1347.54	581.995	1636.28	974.454	1334.01	1044.99	620.487	1000	861.369	1263.18	1188.34	2694.89	2595.2	800.572	612.506	2126.18	1201.84	725.26	1138.1	1917.38	628.067	1115.79	7242.33	1557.24	672.098	981.696	631.012
641648	SNORD87	non-coding	0	0	0	0	0	0	0	0	0	0	0	0	0	0	0	0	0	0	0	0	0	0	0	0	0	0	0	0	0	0	0	0	0	0	0	0	0	0	0	0	0	0	0	0	0	0	0
641702	FAM138F	non-coding	0	0	0	1.1132	16.8539	0	0.3366	1.2716	3.288	0	0.551	0	0	0	0	0	0	2.0346	0	0	0.2599	0	0	0.2854	0	0.8779	0	0	0	0.4016	0.4484	0	1.2393	0.8173	0.7197	1.4462	0	0.2728	0.8026	0	2.3006	0	0	0	1.7067	1.4356	2.3086
641977	SEPT7P2	non-coding	98.2003	99.7937	139.643	145.083	85.3933	88.9085	95.9434	126.52	203.387	117.002	173.003	141.903	188.862	172.761	349.528	45.1349	101.379	95.6256	111.504	77.6381	159.085	85.5488	173.587	73.0698	68.6377	77.8404	186.146	100	185.872	100.412	85.6502	112.409	127.033	134.859	82.4112	180.777	76.2943	112.103	61.3995	77.7156	107.745	278.317	255.437	233.142	130.051	95.327	115.814
642280	ZNF876P	non-coding	5.0861	4.3561	4.8764	14.4712	19.1011	7.0773	7.0695	2.2252	8.9246	12.7971	10.4683	3.8954	9.2817	38.3436	2.3071	5.5952	15.6541	7.4602	33.6283	4.374	0.7798	6.8439	3.7465	0.5709	11.8972	2.0484	8.8259	0.4	2.2075	6.0247	0.8969	2.4331	0	6.9473	16.1943	1.4462	8.8032	0.8183	8.0261	1.57	3.4509	42.0712	54.2959	19.8641	7.1681	5.4555	3.8476
642569	TRIM53AP	non-coding	0	0	0.8866	0	19.1011	0	0	0	0	1.8282	0	0	0.4036	0	1.1536	0	0	0.3391	0	0	0	0	0	0.2854	0	0	0	0	0	0.8033	0	0	0	0	0	0.241	0	0	0	0	0.3834	0	0	0	0	0	734.513
642819	ZNF487	non-coding	18.7793	39.2047	28.8152	8.9054	24.7191	27.4245	33.6644	28.9279	38.5167	43.8757	14.876	28.9371	28.2486	64.1931	13.8427	30.9603	79.3887	12.8857	7.0796	19.1361	24.4346	31.8505	44.3334	16.8403	22.2691	27.5075	47.3389	29.6	10.1545	17.6725	13.4529	10.219	22.928	31.0584	47.5034	12.2929	69.1679	30.8215	11.4372	50.2404	14.5706	40.6329	61.0828	16.2049	79.8736	16.9406	14.2362
642826	BMS1P6	non-coding	44.5423	56.3597	55.5824	76.5529	41.8876	18.8168	14.9133	48.8723	155.758	115.466	79.6529	72.571	103.204	69.8628	65.8221	35.8804	58.0656	44.7847	44.6991	32.6791	71.9106	16.5807	23.9276	31.1003	33.4586	19.8932	122.485	59.108	57.5011	88.0851	46.1749	56.8564	94.488	113.331	35.4332	101.782	36.1937	43.0819	32.008	96.8188	60.464	87.3031	128.675	72.5196	57.4168	43.7155	25.5175
642846	LOC642846	non-coding	283.646	272.453	370.608	163.265	229.214	323.786	199.63	184.694	147.491	314.442	291.46	377.852	251.412	149.066	260.704	78.3333	117.406	113.937	154.867	149.535	301.534	66.5965	137.996	105.323	278.517	132.855	330.302	208.4	381.015	404.458	336.771	957.664	625.252	212.505	78.4525	363.001	132.048	205.659	118.786	133.844	230.445	34.8795	196.206	255.619	100.695	90.7329	93.4975
642852	LOC642852	non-coding	112.676	106.13	203.037	178.479	195.506	57.503	337.654	48.637	239.085	197.441	179.614	57.8742	366.828	177.931	63.4457	269.69	45.0988	262.462	111.504	140.514	299.974	196.368	255.698	653.918	304.751	53.5518	459.749	354.8	339.073	159.454	537.22	260.827	173.509	430.323	167.341	322.266	47.3695	249.572	224.128	73.3981	85.8896	266.091	294.925	35.5463	336.22	282.535	218.546
642929	LOC642929	non-coding	0	0	0	0	2.2472	0	0	0	0	0	0	0	0	0	0	0	0	0	0	0	0	0	0.3122	0	0	0	0	0	0	0	0	0	0	0	0	0	0	0	0	0	0	1.4383	0	0	0	0	0
642946	FLVCR1-AS1	non-coding	11.7371	72.0732	5.3197	7.0501	11.236	58.83	58.9126	4.4504	42.2744	21.9378	76.584	13.3556	33.0912	59.0232	136.12	62.6666	128.215	42.3872	87.6106	140.241	53.8082	191.366	30.5963	170.401	5.491	11.998	50.8157	40	15.4525	21.2873	38.1166	61.3139	4.3377	44.5443	33.4683	44.1097	33.5359	27.8212	34.9135	4.71	8.4356	72.9953	11.723	85.7292	86.359	93.8913	12.6972
642976	GRIK1-AS1	non-coding	0	7.1281	0.8866	3.3395	2.2472	0.8847	0.6733	0.6358	1.4091	1.8282	2.2039	0	0.8071	1.7233	0	1.119	0	1.0173	1.7699	1.0935	0	1.8426	0	0.2854	1.5253	0.5853	1.6047	0	0	0	2.2422	0	0.6197	0.4087	0.3599	0	0.4192	0	0.8026	0	0	0	0	0.5227	0.3413	0.8614	0
643036	SLED1	non-coding	0.7825	0.396	0.8866	11.8738	2.2472	1.7693	0.3366	0.9537	0.4697	0	0	0.5565	2.4213	0	0	1.4921	0	4.0692	0.885	0.5467	1.0398	0	0	0.8563	0.3051	0.5853	0.2675	0.8	2.2075	4.8198	0.4484	9.7324	5.5771	0.4087	0.7197	1.2052	0	1.6365	1.6052	3.5325	2.3006	0	2.468	2.091	4.4374	0.8614	0.7695
643160	CYMP	non-coding	0.7825	0	0	0	2.2472	0	0	0	0.4697	0	0	0	0.8071	0	0	0	0	0	0	0	0	0.2632	0.3122	0	0.3051	0.5853	0	0	0	0.4016	0.4484	0	0	0	0	0	0	0.2728	0	0	0	0	0	0	0	0	0.3848
643210	EHMT1-IT1	non-coding	0.3912	3.1681	2.2166	5.9369	11.236	0.4423	0.6733	5.0862	1.4091	3.6563	2.7548	2.7824	2.0178	1.2925	3.4607	1.119	0.3727	1.0173	0	0.2734	0.2599	1.3161	1.561	1.998	1.2202	0	2.6745	3.2	2.2075	0.8033	0.8969	2.9197	4.3377	0.4087	1.0796	0.241	0	2.1821	2.6085	1.57	2.3006	0.3596	3.085	0.5227	0.6827	2.297	1.5391
643224	TUBBP5	non-coding	110.329	66.9251	40.3413	49.3506	88.764	84.9276	137.351	99.8172	234.388	7.3126	18.1818	125.209	34.3019	40.4977	14.9963	87.6587	16.0268	34.9271	30.9735	42.3729	23.6548	42.906	208.867	216.07	64.977	122.613	162.075	92.4	154.084	125.314	100	143.552	228.04	128.729	82.0513	109.189	44.8543	46.9142	52.3702	18.0551	43.3282	24.0921	0	89.3884	97.6232	67.7625	45.4021
643253	CCT6P1	non-coding	81.3772	97.0216	129.89	81.2616	42.6966	27.8669	76.7548	131.288	67.6391	102.377	98.6226	99.054	93.6239	81.4262	234.173	45.1349	60.0075	43.0654	85.8407	77.0913	108.396	41.8531	103.653	59.0838	42.0978	74.6214	176.518	80.4	149.669	82.7392	117.937	153.771	164.214	109.522	73.0544	142.452	109.411	165.018	125.006	61.2305	74.0031	88.0978	117.23	184.527	80.2149	61.1586	70.7965
643387	LOC643387	non-coding	35.2113	36.8286	63.3935	52.6902	71.9101	49.9834	46.7935	48.9549	74.2151	58.5009	74.9311	67.8909	50.8475	28.4345	38.0674	33.5714	30.1901	34.588	46.9027	34.1717	41.8508	42.3796	43.3968	45.954	38.7422	32.1896	66.8628	60.4	34.8786	43.3778	43.9462	65.2068	56.3904	48.631	27.7103	55.4384	28.0864	62.7341	67.0178	39.6428	41.0276	30.5645	28.9989	19.8641	25.2592	55.7031	43.863
643432	TSG1	non-coding	0.7825	0.396	0	0	48.3146	0.4423	0.6733	0.3179	3.288	1.8282	0	1.6694	0	0	0	0	0	0.6782	0.885	0	6.2386	1.3161	0.3122	0.2854	0	0	0	0.4	0	0	0.4484	1.4599	8.0558	6.9473	0	0	0	2.7276	0.4013	0	0	0	1.851	0	19.4564	0	0
643486	BRDTP1	non-coding	0	0	0	0	6.7416	0	0	0	0	0	0	0	0	0	0	0	0	0	0	0	0	0	0	0	0	0	0	0	0	0.4016	0	0	0	0	0	1.4462	0	0	0	0	0	0	0	0	0	0	0.3848
643719	SCGB1B2P	non-coding	3.9124	4.7521	4.8764	8.5343	4.4944	3.981	7.4062	1.2716	1.8789	25.5941	9.3664	3.8954	6.0533	3.0158	2.3071	5.2222	2.9817	1.0173	1.7699	3.8272	4.1591	3.1587	4.0587	5.7086	4.2708	2.6337	8.0235	1.6	5.7395	4.8198	4.0359	3.4063	3.718	20.8418	5.0382	1.4462	1.6768	11.183	10.4339	1.57	1.1503	9.3492	0	1.0455	5.1201	2.8713	1.5391
643763	UG0898H09	non-coding	0	0.396	5.763	0	56.1798	0.4423	0.3366	0	0.9394	1.8282	1.1019	0	0	38.3436	0	0.746	0	9.4947	0	4.374	4.1591	2.8955	1.2488	0.2854	0.6101	0.2926	0	2.8	0.4415	50.2058	0	0	0	0	1.4395	0.4821	0	0.5455	0	0	0	107.156	24.6799	0	0	3.4456	0
643837	LINC01128	non-coding	96.2441	107.318	95.7553	115.028	539.326	121.641	169.668	98.5457	114.141	157.221	209.366	158.041	154.964	154.236	98.0525	89.5238	169.214	120.719	142.478	69.1635	63.426	145.038	188.573	123.02	120.802	52.9666	113.132	150	67.1082	95.9936	129.148	247.202	39.6592	99.7139	97.5259	170.413	72.1023	78.0084	165.137	112.648	78.9877	239.123	50.5939	88.3429	190.809	128.634	123.509
643923	LOC643923	non-coding	0	1.584	0.4433	0	0	0	0	0	0	0	0	0	0	0	0	0.373	0	0	0	0	0	0	0	0.2854	0	0	2.942	0.4	0	0	0	0	0	0	0	0	0	0	0	0.3925	0	0	0	0	0	0	0
643955	ZNF733P	non-coding	0	0	0	0	11.236	0	0	0	0	0	0	0	0	1.2925	0	0	0	0	0.885	0	0	0	0	0	0	0	0	0	0	0	0	0	0	0	0	0	0	0	0	0	0	0	0	0.5227	0	0	0
644076	GLYCAM1	non-coding	0	0	0	0	1.1236	0	0	0	0	0	0	0	0	0	0	0	0	0	0	0	0	0	0	0	0	0	0	0	0	0	0	0	0	0	0	0	0	0	0	0	0	0	0	0	0	0	0
644128	RPL23AP53	non-coding	72.77	102.17	145.406	92.3933	132.584	96.4282	170.678	201.542	151.248	157.221	255.096	87.9243	138.418	114.169	44.9888	131.674	132.315	152.594	84.0708	100.055	89.1604	76.3359	201.061	104.181	147.342	38.6276	335.919	72.8	46.2208	167.487	95.9641	121.168	44.6166	85.4107	185.695	185.357	82.1631	166.382	231.151	58.483	46.7791	350.234	70.9548	52.2739	121.517	133.228	92.3432
644145	LOC644145	non-coding	0	0	0	0	0	0	0	0	0	0	0	0	0	0	0	0	0	0	0	0.2734	0	0	0	0	0	0	0	0	0	0	0	0	0	0	0	0.7231	0	0	0	0	0	0	0	0	0	0	0
644165	BCRP3	non-coding	1.9562	3.5641	3.1032	9.6475	3.6404	8.3999	9.426	1.2716	32.4057	25.5941	12.1212	4.4519	24.6166	8.1857	2.3071	11.1867	0.7454	14.1879	2.6549	4.3712	8.5781	7.0992	6.8686	7.7066	5.186	1.4632	1.8722	8	12.7947	6.4263	4.0359	6.7932	9.9148	6.13	11.1561	9.8825	2.5152	10.6239	5.6183	2.355	2.6495	3.2362	10.489	3.1364	2.7137	6.2996	2.3086
644172	LOC644172	non-coding	0.3912	9.9002	41.6713	2.2263	11.236	7.0773	25.2483	55.3127	7.0457	12.7971	6.0606	16.6945	80.3067	7.3241	29.9925	13.0555	5.5908	5.4256	7.9646	18.316	19.4957	25.533	9.054	7.7066	17.9983	12.2906	8.8259	34.8	10.596	4.0165	3.5874	5.3528	1.2393	8.1733	10.7962	51.0997	12.9952	11.7285	20.2659	2.355	14.954	303.848	3.702	3.6592	10.2402	6.604	6.541
644314	MT1IP	non-coding	0	0	0	0	8.9888	0	0	0.3179	0	1.8282	1.1019	1.6694	0.4036	0	0	0	0	0.3391	0	0	0	0	0	0.5709	0	0	1.0698	0	0.4415	0	0.8969	0	0	1.226	0	0.7231	4.192	0	0	0.3925	0	1.4383	0	0	0	0	0
644444	TMEM30C	non-coding	0	0	0	0	0	0	0	0	0	0	0	0	0	0	0	0	0	0	0	0	0	0	0	0	0	0	0	0	0	0	0	0	0	0	0	0	0	0	0	0	0	0	0	0	0	0	0
644511	RPL13AP6	non-coding	6.2598	6.3361	5.763	8.9054	16.8539	7.5196	16.1589	6.3578	8.4549	9.1408	14.3251	9.4602	7.2639	4.7391	11.5356	5.9683	11.9269	8.1384	3.5398	3.2805	7.0185	2.6323	5.3075	7.1357	11.8972	6.1453	14.7098	6	20.3091	12.8527	39.4619	30.6569	34.7018	7.3559	8.9969	21.6933	10.8992	3.5458	9.23	1.57	6.9018	5.7533	22.2119	11.5003	6.1441	10.3367	10.7734
644596	SMIM10L2B	non-coding	14.0845	20.1963	15.0726	24.4898	153.933	57.0607	60.9325	27.0206	46.9716	25.5941	60.6061	69.5604	109.766	33.1736	14.9963	41.7778	54.7894	44.4218	116.814	32.8048	154.926	31.5873	29.6597	44.8123	28.0652	60.2824	69.5373	15.6	136.424	36.5499	15.2466	40.8759	29.7444	203.514	60.4588	60.7412	27.248	55.9151	78.6556	18.0551	6.9018	43.8691	8.638	34.5008	14.6776	71.4952	111.966
644619	INTS4P2	non-coding	8.9984	8.7121	8.4229	4.4527	17.9775	2.654	9.7627	9.8546	16.44	18.2815	5.5096	18.3639	9.6852	15.9406	20.7641	11.1905	7.4543	5.7647	23.0088	9.0213	9.098	6.8439	7.8052	9.1337	9.4567	20.7769	35.0361	8.8	3.532	5.2214	11.6592	12.6521	0.6197	16.7552	11.516	12.7749	10.48	27.8212	7.0228	6.6726	7.6687	9.7087	3.085	18.2959	16.3843	8.901	13.8515
644669	LOC644669	non-coding	0	0	0	0	16.8539	0	0	0	0	0	0	0	0	0	0	0	0	0	0	0.2734	0	0	0	0	0	0	1.3373	0	0	0.4016	0	0	0	0	0	0	0	0.2728	0.2007	0	0	0	0	0	0	0	0
644873	LINC01184	non-coding	289.515	176.619	494.292	231.911	301.124	164.105	368.625	205.992	258.813	404.022	265.014	151.92	205.004	331.736	340.3	262.603	382.035	264.836	252.212	191.908	260.203	246.644	188.573	180.962	246.486	325.993	107.783	232.8	258.72	201.225	158.296	195.62	399.69	248.059	295.097	184.393	231.817	232.389	116.579	335.198	230.445	601.582	214.098	303.189	265.562	409.734	287.803
644936	LOC644936	non-coding	100.156	73.2612	45.6611	59.3692	88.764	108.371	43.427	46.4118	63.4116	60.3291	125.069	79.5771	61.7433	181.378	61.1386	26.8571	72.3071	30.5188	52.2124	53.5812	35.0923	51.8558	51.8264	39.96	54.9101	46.236	25.1404	88	22.0751	28.1153	35.426	27.7372	17.3509	91.5407	127.395	31.5758	96.4158	69.0075	20.2659	140.124	99.6933	19.0579	45.0409	34.5008	29.6966	48.5249	70.4117
644997	PIK3CD-AS1	non-coding	0.3912	0.396	0	4.0816	8.9888	0.4423	0.3366	0.3179	0	1.8282	3.8567	0.5565	1.2107	6.0316	1.1536	1.119	1.4909	1.0173	1.7699	3.2805	0.5199	0.5265	0.6244	0.5709	7.6264	0.5853	0	0.4	0.4415	0.4016	0.4484	0	1.2393	0.4087	1.0796	0.241	1.6768	0	0.602	2.7475	8.0521	0	8.638	0.5227	2.048	4.0198	1.5391
645166	LOC645166	non-coding	138.889	29.3045	57.6305	35.2505	216.854	36.7135	339.337	238.099	37.5773	122.486	58.4022	145.799	176.352	64.1931	159.191	164.5	242.266	106.477	170.797	97.0476	105.797	133.719	25.601	44.5269	153.138	171.483	48.9436	78.8	319.647	212.471	174.888	99.7567	298.063	217.818	145.749	206.809	129.113	194.748	275.295	429.791	287.577	43.5095	433.75	419.237	177.838	172.565	331.666
645323	LINC00461	non-coding	0	2.772	10.1962	2.5974	25.8427	0	0.3366	0.9537	5.1669	0	0	1.113	6.4568	6.8932	16.1498	2.9841	2.9817	0.3391	1.7699	0.8201	2.0795	1.8426	0	0	7.3214	0	8.0235	12.8	46.3576	11.2461	3.139	0	3.0984	2.0433	1.0796	9.1594	1.6768	0.8183	1.0033	5.1025	10.7362	175.117	0	52.7967	1.3654	2.297	11.9277
645332	FAM86C2P	non-coding	120.109	89.4975	97.0852	44.1558	80.8989	115.006	111.429	189.78	226.873	82.2669	118.457	145.799	108.152	96.5051	100.36	70.873	93.9247	57.6467	200.885	141.881	68.8848	102.395	112.707	102.754	151.918	336.528	116.341	89.2	162.914	141.781	128.251	206.326	89.2332	105.027	72.3347	235.734	88.0319	150.562	53.7748	74.5756	69.4018	268.249	9.872	96.7067	171.353	45.0793	200.846
645367	GGT8P	non-coding	0	1.98	2.2166	0.7421	25.8427	3.0963	2.3565	1.2716	29.1224	0	2.2039	1.113	3.2284	3.4466	0	0.373	1.4909	5.0865	0	1.0935	0.2599	0.2632	0	0.2854	1.8303	0	1.0698	0.8	0.883	0.4016	0.8969	0	5.5771	0	0.7197	9.1594	0.4192	4.0914	4.8157	4.3175	0.7669	0	0	0.5227	0	0.5743	1.1543
645431	FUT8-AS1	non-coding	27.6174	18.7192	23.8989	12.3748	10.9551	19.9934	24.2922	7.4068	17.8774	60.4388	63.5262	8.5309	15.565	37.2406	18.3301	21.2022	29.0533	17.6975	56.7257	44.2619	38.2844	45.412	5.8695	18.1932	13.2211	23.0478	10.0455	36.324	17.3289	18.8613	25.2601	21.2895	9.859	8.2959	36.6496	4.5194	18.2226	12.2931	2.8673	6.0406	15.5598	46.8069	9.5696	3.7428	29.4815	44.1203	28.2801
645455	CEP170P1	non-coding	0.7825	0.396	3.1032	7.4212	4.4944	0	2.0199	0.9537	2.8183	1.8282	3.3058	2.7824	3.632	1.7233	2.3071	4.8492	1.8636	4.0692	0.885	2.4604	1.5597	3.1587	1.8732	1.998	4.5758	0	13.3726	1.6	0.883	1.6066	1.7937	5.3528	0.6197	1.6347	1.0796	8.4363	2.096	1.9093	14.447	0.3925	4.2178	0.7192	0	0	3.4134	2.297	1.9238
645528	LINC00264	non-coding	0	0.792	0.4433	0	3.3708	0.4423	1.3466	0.3179	0.4697	1.8282	0	0.5565	0.4036	0.4308	0	0	0	0	0.885	0	0	0.2632	0	0.2854	0	0	0	0	0.4415	0	0	0	0	0.8173	0.3599	0.7231	0.4192	0.5455	0.4013	0	0.3834	0	0	0.5227	0	1.1485	0
645644	FLJ42627	non-coding	8.6072	14.6522	14.186	25.974	53.5169	15.0393	28.2781	17.0865	37.7088	32.9068	48.7218	5.0083	87.4132	10.37	11.5356	59.6825	20	35.6053	25.6637	11.4817	46.2152	64.3722	25.9038	13.1297	13.1174	13.4757	161.244	13.808	14.5695	46.591	44.1839	42.365	20.5856	29.4238	43.1849	21.5679	10.8992	26.4547	39.3118	16.0926	17.2546	72.2762	35.0085	10.9775	20.4804	17.5149	8.4648
645676	ASH1L-AS1	non-coding	54.4601	50.9383	48.0727	34.6976	43.3258	90.1338	21.3701	53.1288	54.13	34.7349	58.1488	108.859	48.2728	36.5298	200.662	41.9755	53.3694	39.3828	94.5664	43.0755	32.7788	39.3235	23.5061	47.5353	26.1067	98.5061	85.8813	92.176	78.2649	117.883	53.7937	108.005	57.3199	143.972	34.6415	29.9343	39.673	30.947	35.706	48.7136	114.762	146.386	81.0057	242.028	60.6698	36.253	79.2728
645683	RPL13AP3	non-coding	20.3443	18.2163	12.856	5.1948	16.8539	11.5006	16.1589	13.0335	12.2126	18.2815	11.5702	16.138	10.0888	21.5413	8.0749	7.4603	34.6627	7.1211	8.8496	6.8343	6.4986	2.6323	7.1808	7.4212	14.3377	11.7053	4.5467	18.8	18.543	8.4346	15.2466	18.0049	24.1673	28.6065	17.6338	11.3287	26.8288	6.0006	6.8222	23.9427	15.7209	7.1917	64.1678	52.2739	16.7257	5.7426	15.0058
645687	LINC00520	non-coding	3.9124	7.9201	8.8662	237.106	19.1011	0.4423	2.3565	5.4041	1.8789	0	13.2231	31.7195	6.8604	1.2925	1.1536	14.1746	9.3179	14.2421	10.6195	1.3669	0.5199	0.7897	39.3381	4.5669	0.3051	58.8192	2.1396	5.2	3.0905	33.3367	10.3139	15.0852	26.646	0.8173	7.5574	59.777	5.0304	0.5455	1.6052	18.8402	1.1503	0.3596	0	0	0	9.7624	10.3886
645752	LOC645752	non-coding	0.7825	0	0.4433	0	8.9888	0	0	0	0.4697	0	0.551	0	2.4213	0	0	0.373	0.7454	0.6782	0	2.187	0.2599	0.2632	0	0	0	0.2926	2.4071	0	0.4415	0	0	0	1.2393	0.4087	0	0	1.6768	0.8183	0	1.1775	0.7669	1.0787	0.617	0.5227	0	0	0
645784	ANKRD36BP2	non-coding	11.3459	217.012	126.787	190.352	194.382	49.9834	57.2294	80.1081	57.775	1925.05	1174.1	68.4474	80.7103	156.821	175.341	19.3968	64.4801	110.885	185.841	226.353	22.615	19.742	21.2301	1.1417	173.577	9.0716	67.1302	181.6	15.4525	6.4263	1.3453	52.0681	66.3052	11.0339	279.262	70.1416	20.96	99.5562	36.318	13.3451	9.9693	0.7192	193.12	80.5018	132.099	533.774	235.86
645843	TMEM14EP	non-coding	1.9562	0.396	0	0	10.1124	0.4423	0	0.3179	0.4697	0	2.7548	0.5565	0	1.7233	3.4607	0.373	0.7454	0.6782	2.6549	0	1.0398	0.2632	0.3122	0.8563	0.9152	1.1705	0.5349	0	1.3245	0.4016	0.4484	7.2993	0.6197	1.6347	0.3599	1.6873	0	1.6365	0.2007	1.1775	1.5337	0	1.234	1.0455	0.3413	0	1.9238
645996	NAP1L6	non-coding	0.3912	22.1764	22.6089	1.1132	67.4157	1.7693	18.5154	0	75.6242	3.6563	4.4077	40.6233	2.0178	1.7233	0	0.746	3.3545	27.806	94.6903	0	0	1.0529	0	8.8483	25.6247	0.2926	1.8722	31.2	22.5166	8.0329	0	0	0	58.4389	0.7197	0	4.192	0.2728	1.0033	0	0	2.1575	0	0	22.5284	3.4456	0.7695
646023	ADORA2A-AS1	non-coding	0	1.188	2.6599	6.679	21.3483	0.4423	2.0199	0	1.8789	3.6746	2.2039	6.1324	15.3511	3.0158	1.1536	3.3571	0	7.1278	7.9646	1.3669	6.4986	1.5794	8.4452	2.8543	7.6295	0.8779	4.0144	1.204	12.8212	1.2049	10.8924	4.3796	1.859	8.1733	1.0796	0.9641	0.8384	1.642	2.6085	2.7475	1.9172	6.4761	151.59	3.6592	2.3894	2.0156	8.08
646024	RAET1K	non-coding	4.3036	1.188	6.2064	17.8108	48.3146	5.308	8.4161	12.0798	2.3486	1.8282	14.876	67.3344	9.6852	4.7391	5.7678	2.9841	7.0816	38.6572	14.1593	4.374	30.9332	12.1084	54.9485	4.2814	19.8287	11.1201	8.8259	0.4	9.713	10.0412	7.1749	18.0049	8.6754	7.3559	4.3185	3.8566	6.7072	17.1837	20.8678	7.8501	24.1564	0	7.404	12.5457	16.043	10.6238	17.6991
646074	POM121L10P	non-coding	11.3459	0.396	4.8764	3.7106	58.1573	10.6204	8.7527	0	13.6265	10.9689	5.5096	5.0083	3.632	0.4308	2.3071	17.1625	3.7272	2.767	1.7699	5.1968	14.0369	23.9616	4.9953	9.7046	1.2202	0.5853	6.1514	2.8	11.4879	11.2461	13.4529	27.7567	5.5771	1.226	1.7994	25.3088	3.3536	3.2867	3.6117	2.355	2.7186	0	1.234	14.114	2.7478	5.7598	0.7695
646113	LINC00643	non-coding	0.3912	0.792	0	1.1132	28.0899	8.4043	1.6832	0.9537	0	5.4845	1.6529	0.5565	0.8071	5.1699	0	4.1032	0.7454	0.3391	0	0.5467	1.0398	5.791	0.3122	0.2854	0.3051	0.5853	0.5349	0.8	0.4415	0	0	0.4866	0.6197	0	3.2389	0.4821	0.8384	0.8183	0.2007	1.57	1.1503	4.6746	0.617	0	0.6827	2.0099	1.5391
646214	LOC646214	non-coding	377.543	203.547	226.532	214.471	264.045	92.0049	209.056	208.217	109.913	85.9232	171.901	106.845	132.365	85.7345	193.798	221.198	91.3157	153.611	404.425	205.03	137.77	156.094	176.709	166.976	132.089	110.615	206.205	304.4	315.673	218.094	637.22	361.557	355.074	385.37	116.959	160.53	101.446	138.56	191.221	176.234	88.5736	52.8587	80.2098	228.96	106.157	96.1884	261.639
646243	CXADRP2	non-coding	1.5649	2.772	2.2166	0.3711	11.236	2.654	2.6931	0	0.9394	3.6563	3.8567	1.113	3.632	0.4308	2.3071	1.119	1.4909	1.0173	0.885	3.5539	1.2997	1.0529	1.8732	0.8563	0.3051	2.3411	99.7593	0.8	0.4415	0.4016	1.3453	1.9465	0.6197	3.2693	2.5191	2.1693	1.2576	10.6375	1.6052	0.3925	2.3006	0	1.234	31.3643	8.8748	0.5743	2.3086
646300	COL6A4P2	non-coding	0	1.188	6.6497	14.8423	50.5618	0.4423	0.3366	1.5894	1.4091	31.0786	8.2645	2.7824	21.7918	0.8617	0	2.6111	2.2363	7.4602	2.6549	5.7408	0.5199	2.6323	0.9366	0.8563	1.8303	0	7.4886	5.2	4.415	8.0329	9.417	9.2457	13.0132	4.0866	3.2389	1.2052	1.6768	1.3638	3.0098	2.7475	1.5337	3.2362	6.17	4.7047	3.4134	11.4852	3.8476
646405	TPTE2P1	non-coding	3.9124	1.584	27.9286	4.8237	49.4382	4.8656	25.5849	1.5894	9.864	9.1408	22.5895	5.0083	4.0355	2.585	19.6105	7.8333	4.0999	4.4083	5.3097	25.9705	31.1931	1.8426	0.6244	7.992	6.7112	4.6821	4.2792	5.6	8.83	4.0165	58.7444	15.0852	29.7444	21.2505	10.0765	4.8207	9.6416	7.3644	0.4013	12.9526	13.4202	2.1575	22.8289	15.6822	2.7307	8.0396	35.0135
646471	LOC646471	non-coding	31.2011	38.0642	51.9073	83.7774	58.3933	21.8688	9.7627	20.3386	35.8111	75.3748	37.2782	26.5721	78.301	33.3718	23.7056	19.0238	30.6858	26.7447	50.5929	18.6577	17.2758	29.1024	39.5067	10.421	18.8403	14.339	68.1359	55.04	50.7726	76.0357	49.287	30.2871	29.2548	30.6661	30.3122	34.6177	29.6039	35.112	26.2232	27.8677	26.76	128.202	39.5249	42.091	52.5595	47.4051	21.0389
646600	IGF2BP2-AS1	non-coding	0.3912	1.584	0.4433	6.308	25.8427	0	0.3366	2.2252	0	0	0	0.5565	1.2107	0	0	1.8651	0	1.0173	3.5398	0	4.419	0.2632	0.3122	0.2854	0	1.4632	0.2675	3.6	7.5055	0.8033	1.3453	3.8929	2.4787	4.4953	0	0.241	0.8384	3.2731	1.0033	7.0651	0.3834	0	0	0.5227	0	0	1.9238
646762	LOC646762	non-coding	113.85	223.348	332.04	235.621	212.36	161.008	209.729	83.9228	414.289	124.314	279.339	320.534	232.849	101.244	433.738	200.682	101.006	197.016	256.637	343.084	509.748	356.673	218.233	416.441	93.0422	158.314	456.539	604.4	407.505	252.636	447.982	119.221	189.62	284.839	137.472	425.188	91.8047	270.848	268.272	246.885	155.291	215.031	54.2959	51.2284	318.129	226.832	195.845
646813	LOC646813	non-coding	0	0	0	0	8.9888	0	0	0	0	0	0	0	0	0	0	0	0	0	0	0	0	0	0	0	0	0	0	0	0	0	0	0	0	0	0	0	0	0	0	0	0	0	0	0	0	0	0
646982	LINC00598	non-coding	0.7825	1.584	2.2166	3.3395	26.9663	0	0.3366	0.6358	0.9394	3.6563	1.6529	1.113	0.4036	0.8617	0	0.746	0.3727	3.0519	0.885	1.0935	0.2599	0.2632	1.8732	2.2834	1.2202	0.8779	1.3373	0.8	0.883	0.4016	7.1749	2.4331	1.2393	3.2693	0.3599	1.2052	0.4192	0.8183	0.2007	4.3175	0	2.5171	0	0	0.6827	1.7228	1.1543
646999	LOC646999	non-coding	5.8685	9.1082	2.6599	18.1818	22.4719	3.981	16.1589	0.9537	9.3943	23.766	7.7135	3.8954	25.8273	19.818	17.3034	11.9365	10.8088	10.8511	4.4248	6.0142	3.1193	16.0569	32.4696	13.7006	8.8466	3.8042	49.211	1.2	0.883	10.8445	5.3812	6.326	3.718	1.6347	14.395	3.6155	6.288	3.0003	3.8124	17.6626	5.3681	25.1708	10.489	21.4323	22.8698	10.0495	10.7734
647033	PA2G4P4	non-coding	75.8998	77.2213	70.0432	57.1429	75.2809	42.4638	65.3089	93.7773	67.1693	96.8921	130.578	119.087	57.7078	46.5293	64.5993	45.1349	81.625	46.4564	84.0708	46.4735	70.9644	36.5886	63.0659	69.9301	42.4028	74.3288	71.4095	75.2	92.2737	75.9112	73.5426	193.187	184.043	95.6273	34.188	74.9623	73.7791	48.278	55.5806	79.2856	65.5675	35.5987	53.0619	127.548	47.7876	45.0793	66.5641
647121	EMBP1	non-coding	24.6479	32.4725	38.5681	72.7273	53.9326	37.1558	37.7041	33.6963	62.4722	109.689	69.9725	25.5982	35.9161	264.097	32.2996	46.2539	74.5434	49.5083	63.7168	30.6178	64.7258	55.8042	77.1152	11.1317	52.1646	18.1432	10.1631	16.4	47.2406	25.7054	12.5561	4.3796	91.0922	14.7119	71.6149	14.7032	26.4096	42.0045	29.6965	28.2602	137.653	21.575	106.741	21.4323	78.8495	44.2179	60.7926
647288	CTAGE11P	non-coding	26.9953	7.5241	19.949	10.3896	24.7191	7.5196	3.0298	9.5367	7.9852	9.1408	22.5895	7.2343	1.2107	7.7549	11.5356	29.4682	7.0816	10.1729	6.1947	9.5681	8.0582	5.5278	10.615	5.4231	3.3556	9.0716	3.4769	19.6	9.713	17.6725	21.0762	14.1119	74.9806	16.7552	10.4363	18.8008	2.5152	5.7279	5.0163	8.6351	11.1196	9.3492	9.255	7.8411	9.8989	8.6139	5.7715
647859	LOC647859	non-coding	9.7809	0.396	0	0	1.1236	0	2.0199	0	0	0	7.1625	0	7.6675	0	6.9214	3.3571	0.3727	0.3391	2.6549	0	3.1193	0.7897	0.6244	6.2794	4.5758	0.5853	0	0.4	1.766	0.4016	4.0359	2.4331	14.8722	0	0	11.3287	0	1.091	0	0.3925	0	40.6329	0	0	0.3413	0.2871	5.0019
647946	MIR924HG	non-coding	87.2457	60.193	29.7019	22.2635	24.7191	1.7693	27.9414	26.3848	19.7281	7.3126	8.8154	25.0417	4.0355	3.8774	42.6817	5.2222	50.6895	19.3286	102.655	6.8343	5.1989	69.2287	36.8405	42.5289	31.7259	90.4236	70.8746	29.2	46.7991	25.3037	14.3498	132.36	29.7444	53.9436	16.1943	15.1853	17.1872	18.8202	34.1109	8.2426	16.4877	12.945	91.9327	278.62	170.67	31.5842	25.3944
647979	NORAD	non-coding	4464.79	5462.91	9648.68	7817.81	5068.54	7363.93	6680.02	6240.17	9754.12	7095.06	7703.03	6899.28	12251.4	6672.21	3768.68	10496.3	4540.44	7607.66	4915.93	8596.5	21235.8	14469.1	5815.8	8704.44	5072.17	6824.2	12569.1	6108.8	6916.11	5297.72	9366.82	4869.59	5143.92	21342.5	8973.1	7169.63	4788.93	7412.98	7626.59	5797.66	4287.19	5436.17	10735.2	4715.63	5424.23	10146.3	4524.82
648691	LL22NC03-63E9.3	non-coding	0	1.98	1.7732	0.3711	22.4719	0	2.6931	0.3179	2.8183	0	0	7.7908	0.8071	1.7233	13.8427	1.8651	0	2.3737	61.0619	7.3811	36.392	6.3175	0	6.2794	1.8303	2.6337	9.3608	2.4	16.3355	0	5.8296	0	4.3377	10.6253	2.5191	7.9542	1.6768	64.9161	13.0424	1.9625	0.7669	0	0	63.7742	30.7206	0.2871	5.0019
648740	ACTG1P4	non-coding	6.2441	3.869	3.1032	9.718	23.8315	2.5036	1.1985	1.8279	10.5639	27.3675	11.3774	2.0701	28.636	5.1699	10.855	10.3773	0.7454	16.0732	5.3097	1.561	5.5264	3.8642	3.4031	2.4918	4.0267	0.5267	3.1639	0.4	6.8344	0.4016	2.6906	10.2725	12.4307	10.3801	8.8853	5.0835	2.9512	13.5342	2.8091	1.2403	4.0452	8.3711	1.851	7.6111	0.6827	11.4823	5.6753
649446	DLGAP1-AS1	non-coding	210.485	206.32	134.767	192.579	71.9101	190.202	99.6465	123.977	151.248	219.378	128.926	101.836	119.451	118.477	196.105	208.889	113.306	92.5738	143.363	241.935	239.147	47.6441	54.9485	130.726	76.2641	172.946	114.737	109.6	381.015	458.681	1001.35	70.073	156.158	41.275	118.039	41.2172	211.696	175.383	74.6426	166.029	239.264	128.731	509.024	429.692	1060.88	127.198	89.6499
649946	RPL23AP64	non-coding	1.1737	4.7521	9.7529	4.4527	4.4944	0.8847	0.6733	3.4968	4.6972	3.6563	6.6116	3.8954	10.8959	4.3083	8.0749	2.2381	3.3545	6.4429	3.5398	2.4604	2.8594	2.369	2.4977	2.8543	2.4405	3.8042	6.1514	4	7.947	2.4099	9.8655	5.8394	1.2393	0.8173	6.4777	4.3387	1.2576	5.7279	2.0065	2.355	2.684	5.0342	3.085	0.5227	4.7788	2.0099	1.5391
650368	TSSC2	non-coding	14.4757	15.8403	14.186	27.4583	38.2022	20.7896	9.426	119.526	23.0161	45.7038	17.0799	16.138	42.7764	21.5413	19.6105	32.4524	15.2814	35.2662	23.8938	25.6971	8.5781	15.7936	32.7818	11.1317	19.2186	20.1917	42.5247	14	23.8411	27.7136	16.1435	22.3844	17.3509	14.3032	30.9492	47.4842	13.4144	171.291	88.4876	9.8126	16.4877	19.4175	16.659	25.6142	26.2832	24.9803	19.2382
650623	BEND3P3	non-coding	6.2598	30.0965	81.5693	37.1058	94.382	9.289	82.4777	18.1197	52.1384	18.2815	58.9532	39.5103	166.263	59.8849	18.4569	53.7143	35.7808	79.688	31.8584	67.5232	72.0042	29.2182	79.3007	47.3812	45.1483	55.8929	61.5138	10.4	25.6071	26.107	77.13	41.3625	150.581	76.4201	47.8632	69.9006	38.1471	48.0052	27.4893	106.368	11.1196	77.3103	16.659	19.3413	66.9026	55.7031	26.9334
650655	ABCA17P	non-coding	0.3912	1.584	18.1758	1.1132	19.1011	3.5386	6.0596	1.9073	4.2274	1.8282	6.6116	71.2298	19.3705	4.7391	5.7678	5.9683	16.3996	2.3737	0	7.1077	4.9389	20.7949	4.9953	6.5649	14.6427	1.1705	3.7443	6.4	28.6976	1.6066	20.1794	3.4063	4.3377	18.7985	3.9586	5.3028	2.5152	21.0023	58.5904	1.9625	1.5337	8.63	0	3.1364	12.9709	5.4555	7.3105
651250	LRRC37A16P	non-coding	1253.52	1076.35	2134.99	840.816	1223.6	1016.03	1190.04	1052.85	1544.89	1575.87	1282.64	507.512	1727.6	1722.01	1057.81	1138.82	1832.65	1136.32	1413.27	1755.6	1729.4	2140.83	982.516	1323.25	893.51	707.879	1169.3	1704	1578.81	1178.03	1279.37	1673.48	1318.05	616.673	1266.04	1075.26	921.4	760.719	870.028	777.156	708.589	1289.82	417.091	815.996	2022.1	1475.56	891.881
651302	ZNF192P1	non-coding	7.8247	14.6522	17.2891	10.0186	12.3596	4.8656	2.0199	8.2651	15.0309	16.4534	28.6501	2.7824	38.3374	4.7391	19.6105	7.8333	5.218	5.0865	26.5487	6.2876	13.517	2.8955	4.3709	8.5629	29.8955	6.1453	2.4071	5.2	14.128	4.8198	1.7937	3.8929	4.9574	25.7458	10.7962	22.4164	24.3136	38.7315	10.0326	27.0827	24.1564	5.3937	14.808	22.4778	9.5575	9.7624	5.0019
652276	LOC652276	non-coding	28.5603	38.4126	29.2586	44.5269	58.427	34.9442	28.2781	63.8957	20.1978	25.5941	57.8512	35.6149	54.4794	92.1969	43.8352	30.9603	24.2266	77.9925	31.8584	40.1859	49.6491	31.5873	64.9391	24.2615	33.5562	64.0866	68.2001	72.4	54.7461	27.7136	60.0897	72.0195	53.292	43.3183	33.1084	38.3248	35.6319	26.7302	39.1272	62.8005	26.4571	46.7458	42.5729	51.2284	26.9659	27.8516	27.703
652965	SNORA48	non-coding	0	0	0	0	1.1236	0.4423	0	0.6358	0	0	0	0	0	0	0	0.373	0	0.3391	0	0	0	0	0	0	0	0	0.2675	0	0	0.4016	0	0.4866	0.6197	0	0	0.4821	0	0	1.2039	0	0	0	0.617	0	0	0	0.7695
652966	SNORD10	non-coding	0	0.792	0.8866	1.4842	0	0.4423	1.0099	0.6358	0.9394	0	0	1.113	2.4213	1.7233	0	0	0.3727	0.3391	0	0	0	0	0.6244	0.2854	0.3051	0.2926	1.0698	0	0	2.4099	3.139	1.9465	0.6197	0.4087	0.3599	0	0	1.6365	0.602	0.785	0.3834	0.7192	11.106	2.091	0.3413	0	0.7695
652995	UCA1	non-coding	14.0845	15.8403	0.4433	76.4378	16.8539	3.5386	0.3366	82.6512	3.7577	138.94	42.9752	5.0083	177.159	2.1541	0	10.4444	56.2803	21.0241	31.8584	52.4877	1.5597	0.2632	24.04	63.6506	0.3051	130.514	16.582	5.6	17.2185	51.4108	4.4843	13.1387	82.4167	80.9154	2.5191	1.2052	34.7935	23.1843	5.4176	56.128	59.0491	0	14.808	85.2065	42.6675	43.9308	10.0038
653113	FAM86FP	non-coding	8.6072	24.1564	16.4025	28.5714	38.2022	9.289	18.5154	12.7156	25.8344	25.5941	25.8953	19.4769	112.591	21.1105	10.382	18.2778	29.4447	5.7647	62.8319	18.5894	29.8934	9.213	77.4274	16.5549	31.1158	28.678	66.8628	7.6	38.4106	29.3202	5.8296	90.5109	95.4299	24.5198	24.1116	16.8726	12.1568	15.0016	14.447	19.6252	92.0245	28.7666	28.3819	13.5912	16.7257	12.9208	26.5487
653162	RPSAP9	non-coding	31.2989	16.2363	17.2891	21.5213	19.1011	28.7515	25.5849	22.888	15.9703	38.3912	16.5289	30.6066	28.6521	43.5135	47.2959	21.2619	50.6895	11.8684	29.2035	17.2225	15.5966	12.6349	10.9273	16.5549	20.7438	32.7749	12.8377	19.2	23.8411	30.5252	13.9013	72.5061	45.8559	34.3277	32.7485	26.514	25.5712	6.5462	7.0228	23.9427	35.6595	25.89	131.421	129.117	53.5904	32.7328	20.7772
653188	GUSBP3	non-coding	15.2582	17.8203	30.1452	35.9926	119.101	17.2509	20.1986	6.6757	62.0025	60.3291	39.1185	18.3639	42.7764	46.9601	24.2247	29.0952	30.5628	35.2662	22.1239	24.3302	46.2698	50.2764	15.2982	13.7006	23.4893	11.4127	80.5028	20.8	24.2826	11.6478	8.5202	26.764	19.8296	20.0245	40.3059	37.1196	37.3087	15.8199	37.3213	44.3529	103.911	102.841	61.6998	134.517	44.3742	60.8714	32.7049
653190	ABCC6P1	non-coding	0	0	3.9898	6.308	7.8652	8.8466	2.3565	0.6358	12.2126	47.532	1.1019	3.8954	14.9314	14.2173	0	4.1032	0.3727	10.1729	1.7699	0	3.3793	1.0529	0.6244	4.5669	2.1354	0.5853	0.5349	1.2	2.2075	21.6889	0.4484	0	1.859	0.4087	7.1975	2.1693	5.0304	0.5455	0.602	0.3925	22.6227	0	331.328	0	1.024	12.0594	15.7753
653238	GTF2H2B	non-coding	57.5117	130.286	18.6191	48.9796	97.7528	26.0975	5.7229	0.3179	103.807	62.1572	80.4408	93.4891	89.1848	178.362	66.9064	95.865	8.1998	91.8956	97.3451	152.816	27.0341	320.874	17.1714	120.736	8.2365	55.015	16.0471	50.4	6.6225	79.1244	6.278	245.256	177.227	12.6686	37.067	10.3646	39.8239	7.0917	4.2137	289.667	146.472	150.665	15.425	10.9775	171.353	96.7626	302.424
653268	AGAP7P	non-coding	6.651	4.3561	7.093	10.0186	5.618	2.654	19.1887	7.9472	18.7886	7.3126	46.832	24.4853	10.8959	13.3556	11.5356	4.8492	2.2363	8.8165	4.4248	4.6473	26.2542	31.8505	4.0587	6.5649	3.9657	3.8042	9.6282	9.6	10.596	6.4263	11.6592	8.2725	19.2099	6.13	5.758	7.7132	7.1264	58.37	31.5024	14.9151	12.6534	11.1471	10.489	8.3638	11.9469	31.8714	4.2324
653316	FAM153C	non-coding	0	0	2.2166	0	6.7416	0	0	0.3179	0	0	0.551	0	1.2107	0	1.1536	0	0	0.3391	0	0.2734	0	0	0	1.1417	0.3051	0	0.2675	3.2	0.883	0	11.2108	0.4866	2.4787	1.6347	0	0.241	0.8384	0.5455	0.4013	0	0	8.2704	0	0	0	0.2871	0.7695
653390	RRN3P2	non-coding	6.2598	6.3361	14.186	61.5955	12.3596	7.0773	2.0199	8.2651	15.5006	49.3601	7.7135	11.1297	25.8273	22.8338	26.5319	8.9524	10.8088	7.1211	3.5398	6.561	5.1989	3.6852	2.8099	5.994	14.3377	1.4632	5.8839	6	6.6225	2.0082	7.6233	4.3796	11.1541	7.7646	17.6338	6.749	12.9952	6.2734	45.7487	7.4576	29.5245	59.3312	67.2528	18.8186	7.1681	25.8416	12.6972
653399	GSTTP2	non-coding	0	0.396	0	0	3.3708	0	0	0	0	0	0	0	0.8071	0	0	0	0	0	0	0	0	0	0.3122	0	0.3051	0	0	0	0	0	0.4484	0	0	0	0	0	0	0.2728	0	0	0	0	6.787	0	0.3413	0	0
653483	MLLT4-AS1	non-coding	3.5211	3.1681	7.5363	16.6976	21.3483	7.0773	3.0298	9.8546	6.576	9.1408	2.7548	22.8158	10.4923	15.9406	4.6142	8.9524	17.8904	24.7542	6.1947	3.2805	3.3793	1.3161	5.9319	4.8523	4.5758	6.7306	106.981	21.6	12.8035	10.8445	2.2422	18.9781	13.6328	16.7552	3.5987	4.8207	5.0304	18.0019	5.0163	9.4201	3.4509	9.3492	116.613	119.184	42.6675	6.604	6.541
653492	PSG10P	non-coding	0	0	0	0	0	0	0	0.3179	0	0	0	1.113	0	0	1.1536	0	0	0	0	0	0	0	0	0	0	0	0.2675	0.8	0	0	0	0	0	0	0	0	0	0.2728	0	0	0	0	0	0	0	0	0
653544	DUX4L6	non-coding	0	0	0	0	10.1124	0	0	0	0	0	0	0	0	0	0	0	0	0	0	0	0.2599	0	0	0	0	0	0	0	0	0	0	0	0	0.4087	0	0	0	0.2728	0.4013	0	0	0	0	0	0	0	0.7695
653545	DUX4L5	non-coding	0	0	0	0	0	0	0	0	0	0	0	0	0	0	0	0	0	0	0	0	0	0	0	0	0	0	0	0	0	0	0	0	0	0	0	0	0	0	0	0	0	0	0	0	0	0	0
653553	HSPB1P1	non-coding	1056.34	755.185	220.769	313.915	1083.15	3455.49	666.554	1444.49	374.363	191.956	961.433	774.624	154.56	540.256	392.21	1069.44	679.091	1002.37	646.903	605.249	239.147	485.917	1418.36	684.744	294.074	1719.22	342.07	1908.8	2111.7	342.203	832.287	764.477	4424.48	1103.39	734.503	151.853	1272.69	248.754	600.552	401.531	230.828	321.827	172.76	332.985	334.172	302.921	715.275
653566	SPCS2P4	non-coding	6469.09	1866.78	1780.34	1311.32	1482.02	2001.99	1500.08	1871.73	2532.24	2758.68	2221.49	1187.53	1501.21	1696.16	1542.31	1282.43	2009.69	1772.8	1380.53	1919.08	1251.1	1027.9	1303.15	1288.14	1812.03	1743.21	1463.23	1470	1840.62	2624.76	2095.96	1278.35	892.951	1031.47	1758.7	1524.07	1950.12	1745.64	1862.85	3054.46	2807.13	1658.76	2311.89	1834.29	2157.95	2359.06	2909.97
653635	WASH7P	non-coding	835.289	876.363	958.439	1243.04	1379.78	931.549	1103.52	1556.7	1021.16	1471.66	838.016	1149.14	998.789	678.121	857.094	679.635	713.38	805.697	980.531	578.185	812.581	824.691	1190.76	793.492	697.969	907.455	1541.59	1810	3460.04	2826.79	1579.37	1979.56	2893.88	2550.47	663.248	1303.28	616.223	772.447	1138.3	1152.39	605.445	1714.85	1093.32	1944.07	798.394	664.418	719.892
653639	LYPLA2P1	non-coding	48.5133	51.4809	43.4445	67.5325	140.449	105.275	57.5661	34.0141	71.3968	43.8757	62.259	42.2927	81.5174	49.9759	39.221	53.3412	77.8979	51.882	76.9912	42.3729	34.3125	102.659	85.2326	77.6366	50.9444	42.4318	94.4103	106.4	51.2141	91.5755	84.7534	85.1582	41.5182	75.1941	78.8124	43.1455	60.3647	78.8267	106.747	76.1456	45.6288	54.297	43.1899	90.4339	72.7054	68.9111	64.2555
653645	TBC1D3P1-DHX40P1	non-coding	0.3912	0	0.4433	0.7421	0	0	1.6832	0.3179	0	0	0	0.5565	0.8071	0	0	25.3651	0	0	0	0	0	0	0	0	0	0.5853	1.8722	0	1.3245	0	0.8969	2.4331	4.9574	0	1.7994	1.2052	0	0.2728	0	0.3925	0	0	0.617	1.5682	53.5904	0	0.3848
653653	LOC653653	non-coding	56.7293	154.443	80.6827	153.989	46.0674	36.2711	72.715	62.6242	55.4264	47.532	76.584	83.4725	131.961	104.691	104.974	71.619	124.115	72.2279	113.274	82.8321	57.4474	36.0621	68.0612	99.0438	79.3147	76.6698	65.793	33.6	57.3951	26.5087	51.1211	30.6569	30.3641	76.4201	96.0864	85.809	149.235	72.2805	120.391	47.4929	98.1595	105.358	111.06	192.891	574.817	84.9903	90.0346
653677	SEC1P	non-coding	7.0423	7.1281	3.9898	10.0186	13.4831	11.5006	15.149	1.9073	3.288	14.6252	8.2645	5.5648	11.703	7.3241	4.6142	10.8175	11.5542	11.8786	5.3097	6.8343	5.9787	3.422	10.615	5.4231	8.2365	14.0464	6.4188	3.6	2.649	6.0247	12.1076	20.9246	13.6328	13.8946	6.4777	6.508	5.8814	3.5458	4.2137	1.9625	1.5337	7.5548	0.617	2.6137	2.048	6.604	2.6933
653687	FAM226B	non-coding	2.7387	2.772	3.5465	2.2263	4.4944	0.4423	3.7031	1.2716	3.288	5.4845	1.6529	3.3389	2.0178	2.1541	4.6142	0.373	1.8636	2.3737	0.885	1.9136	4.1591	2.1058	0	1.4271	0.9152	1.4632	7.4886	1.2	4.415	2.0082	0	9.2457	16.7312	6.9473	2.1592	0.7231	0.4192	1.6365	1.2039	0.785	3.8344	22.2941	2.468	1.5682	13.3123	2.8713	6.9257
653786	LOC653786	non-coding	10.1721	2.376	0.8866	17.0686	24.7191	12.3853	3.7031	0.6358	1.8789	7.3126	3.3058	2.7824	4.8426	11.2015	6.9214	7.8333	4.8453	17.9722	6.1947	5.7408	3.8991	5.0013	0.6244	9.99	2.4405	1.4632	0.8024	2.4	4.415	1.6066	4.0359	2.4331	3.718	2.452	17.274	2.1693	6.288	1.9093	1.8059	2.7475	5.7515	8.63	36.4029	8.8866	6.1441	30.1486	17.6991
654319	SNORA5A	non-coding	0	0	0	0.3711	0	0	0	0	0	1.8282	0	0	0	0	0	0	0	0	0	0	0	0	0	0	0	0	0	0	0	0.4016	0.4484	0.9732	0	0	0	0	0	0	0	0	0	0.3596	1.234	1.0455	0	0	0.3848
654320	SNORA8	non-coding	113.717	498.842	566.251	518.601	249.966	205.343	118.169	932.56	342.113	342.834	227.89	480.351	563.769	311.884	446.681	207.192	294.365	296.867	331.858	194.308	233.499	181.853	233.328	192.918	139.658	208.246	411.599	387.748	741.572	456.19	698.856	992.078	258.919	200.082	181.376	581.296	228.48	243.948	321.304	697.184	406.469	342.916	498.146	303.016	449.012	166.093	184.994
654321	SNORA75	non-coding	0	0	0.4433	0.3711	0	0	0	0	0	0	0	0	0	0	0	0	0	0	0	0	0	0	0	0	0	0	0	0	0	0	0	0.4866	0.6197	0	0	0	0	0	0	0	0	0	0.617	0	0	0	0
654322	SNORA13	non-coding	0	0	0	0	0	0	0	0	0	0	0	0	0	0	0	0	0	0	0	0	0	0	0	0	0	0	0	0	0	0	0	0	0.6197	0	0	0	0	0	0.4013	0	0	0	0	0	0	0	0
654342	LOC654342	non-coding	158.451	26.1364	80.2394	69.3878	447.191	91.5625	572.294	252.086	107.565	228.519	180.165	331.107	676.352	159.406	287.236	254.024	691.018	165.819	192.92	126.299	141.929	657.805	50.5776	133.01	210.794	229.717	231.88	126.8	143.929	153.027	240.807	196.107	237.335	354.72	187.494	278.638	155.942	393.588	632.656	315.573	370.399	179.432	844.054	495.557	542.048	230.565	219.315
654412	FAM138B	non-coding	0	0	0	0	7.8652	0.4423	0	0	0	0	0	0	0	0	0	0	0	0	0	0	0	0	0	0	0	0.2926	0	0	0	0	0	0	0	0	0	0	0	0	0	0	0	0	0	0	0	0	0
654433	PAX8-AS1	non-coding	43.036	1059.71	876.383	391.095	410.112	14.5969	96.2801	18.7555	285.629	1074.95	165.427	391.764	298.378	90.4736	529.818	45.5676	1394.03	129.905	83.2389	16.6758	50.9488	84.2327	1361.52	207.507	127.514	820.004	230.04	398.556	11.9205	176.219	47.5336	298.36	21.6886	1096.85	79.1723	237.717	762.922	311.663	792.642	462.6	273.006	7.1917	11.723	789.341	26.6245	383.605	191.612
654434	SNHG20	non-coding	86.4632	150.879	229.635	175.881	108.989	86.6969	55.2096	95.0489	175.674	144.424	92.011	99.6105	104.923	61.6082	174.187	87.6587	485.278	134.961	256.637	112.63	171.822	176.889	101.78	193.521	40.5725	136.952	144.691	142.4	306.843	171.905	191.928	327.494	249.109	106.253	74.1341	157.879	53.2383	155.199	104.74	94.5933	104.678	243.797	43.8069	196.55	146.094	146.723	122.74
654466	KGFLP2	non-coding	91.5023	97.778	54.7179	88.7978	107.101	123.397	55.5664	67.561	77.085	29.8537	172.039	53.0273	30.2502	27.9046	168.604	64.0431	33.5781	216.155	54.4602	28.9858	68.0582	24.7065	150.15	102.495	21.4058	97.5668	140.53	73.264	257.144	24.7896	132.076	60.4088	27.9845	323.069	84.3149	50.7068	161.652	71.6614	18.0065	126.335	35.5752	884.045	22.4834	35.9226	78.6721	28.5981	94.8442
654816	NCF1B	non-coding	14.0845	25.3444	26.5987	201.484	67.4157	32.2902	18.5154	15.5766	39.4561	283.364	84.8485	20.0334	41.1622	57.2999	72.6742	22.754	18.6359	91.5565	100.885	94.0405	20.2755	40.537	6.5564	9.7046	48.1989	23.9959	19.7914	26.4	16.3355	2.0082	5.3812	15.0852	26.0263	10.6253	89.9685	17.5957	34.3743	5.7279	18.46	18.4476	108.512	8.63	83.2948	32.4098	37.2061	191.803	30.7811
654817	NCF1C	non-coding	20.3443	42.3727	27.9286	341.002	103.371	91.5625	53.863	51.8159	42.7441	180.987	113.499	31.163	81.5174	170.607	174.187	42.5238	39.1353	82.7399	144.248	202.023	11.1775	102.395	20.6057	28.2575	185.779	31.3117	15.7796	31.6	26.0486	9.6395	7.1749	38.4428	22.3083	13.4859	85.65	64.3567	44.4351	29.185	26.4861	12.1676	87.4233	6.4725	143.761	36.5917	38.2301	294.308	41.5544
664618	HSP90AB4P	non-coding	0	0.396	0	2.5974	14.6067	0	0.3366	0.6358	1.8789	3.6563	3.3058	0.5565	0.4036	0.4308	0	1.8651	0	0	0.885	0	0.5199	0.2632	0.6244	0.5709	0.6101	0.8779	3.2094	0.8	1.3245	0.4016	0.8969	0.4866	2.4787	1.226	0.7197	0.9641	0.4192	1.091	2.4078	2.355	6.9018	0.7192	0.617	1.0455	1.7067	1.1485	1.9238
664701	ZNF826P	non-coding	1.9562	13.8602	5.3197	14.8423	21.3483	20.3472	3.0298	4.4504	28.1829	16.4534	58.4022	6.1213	11.2994	47.8217	4.6142	8.2063	58.5166	5.4256	5.3097	5.4675	1.8196	161.358	2.8099	2.2834	9.1517	1.4632	5.0816	2.4	2.2075	0.8033	1.3453	0.9732	4.9574	21.6592	21.2326	3.3745	17.6064	1.6365	3.4111	7.0651	11.5031	12.2258	247.416	10.9775	10.5815	9.4753	25.7791
677679	SCARNA3	non-coding	0	0	0	0	0	0	0	0	0	0	0	0	0	0	0	0	0	0	0	0	0	0	0	0	0	0	0	0	0	0	0	0	0	0	0	0	0	0	0	0	0	0	0	0	0	0	0
677681	SCARNA20	non-coding	0	0	0	0	0	0	0	0	0	0	0	0	0	0	0	0	0	0	0	0	0	0	0	0	0	0	0	0	0	0	0	0	0	0	0	0	0	0	0	0	0	0	0	0	0	0	0
677763	SCARNA21	non-coding	0	0	0	0.3711	0	0	0	0	0	0	0	0	0	0	0	0	0	0	1.7699	0	0	0	0	0	0	0.2926	0	0	0	0	0	0	0	0	0	0	0	0	0	0	0	0	0	0	0	0	0
677765	SCARNA18	non-coding	0	0	0	0	0	0	0	0	0	0	0	0	0	0	0	0	0	0	0	0	0	0	0	0	0	0	0	0	0	0	0	0	0	0	0	0	0	0	0	0	0	0	0	0	0	0	0
677766	SCARNA2	non-coding	6.2598	2.376	0.4433	2.5974	5.618	7.5196	4.713	1.5894	0	27.4223	3.3058	2.7824	2.0178	16.8022	1.1536	0.746	20.8722	1.3564	4.4248	1.6402	2.3395	1.0529	9.9906	1.1417	2.1354	7.9011	5.349	0.8	4.8565	3.6148	5.8296	2.9197	1.859	11.8512	7.9172	2.4104	8.8032	3.2731	2.2072	9.4201	4.2178	17.9791	46.8919	121.798	18.091	4.3069	9.6191
677767	SCARNA7	non-coding	0.3912	0.396	3.5465	1.4842	0	1.7693	1.6832	0.9537	3.288	1.8282	0	0.5565	0.4036	5.6007	1.1536	1.119	4.0999	0.6782	0	1.9136	1.0398	0.5265	2.1855	0.2854	0	0.2926	0.5349	0.4	3.9735	3.2132	4.4843	0	6.8164	17.9812	0.7197	0.9641	0	0.5455	1.0033	0	2.684	0.7192	3.085	2.091	0	0.5743	0
677769	SCARNA17	non-coding	0.3912	3.9601	3.9898	13.3581	3.3708	1.7693	3.7031	3.1789	24.8949	12.7971	5.5096	3.3389	7.2639	3.0158	1.1536	2.2381	2.9817	3.7301	2.6549	1.9136	1.8196	3.422	3.4343	2.2834	2.1354	0.5853	7.4886	2	1.3245	2.8115	6.278	0	1.859	9.3993	4.6784	4.8207	1.2576	3.5458	2.2072	2.355	2.684	2.8767	2.468	3.1364	4.7788	13.4951	3.4629
677770	SCARNA22	non-coding	0	0	0	0	0	0	0	0	0	0	0	0	0	0	0	0	0	0	0	0	0	0	0	0	0	0	0	0	0	0.4016	0	0	0	0	0	0	0	0	0	0	0	0	0	0	0	0	0
677771	SCARNA4	non-coding	0	0	0	0	0	0	0	0	0	0	0	0	0	0	0	0	0	0	0	0	0	0	0	0	0	0	0	0	0	0	0	0	0	0	0	0	0	0	0	0	0	0	0	0	0	0	0
677772	SCARNA6	non-coding	0	0.792	0.8866	1.8553	1.1236	1.7693	1.0099	0.6358	0.4697	0	0	0.5565	0.8071	7.3241	0	0	6.7089	0.6782	0	0.2734	0.2599	1.3161	0.9366	0.2854	0.3051	0.8779	2.4071	0.4	0.4415	0.4016	1.3453	0.4866	0	1.6347	2.879	0.4821	0.8384	0	0	1.9625	1.1503	4.315	12.957	11.5003	1.7067	0.5743	1.5391
677773	SCARNA23	non-coding	0	0	0	0	0	0	0	0	0	0	0	0	0	0	0	0	0	0	0	0	0	0	0	0	0	0	0	0	0	0	0	0	0	0	0	0	0	0	0	0	0	0	0	0	0	0	0
677774	SCARNA1	non-coding	0	0	0	0	0	0	0	0	0	0	0	0	0	0	0	0	0	0	0	0	0	0	0	0	0	0	0	0	0	0	0	0	0	0	0	0	0	0	0	0	0	0	0	0.5227	0	0	0
677775	SCARNA5	non-coding	1.9562	1.188	1.7732	0.7421	4.4944	3.5386	1.0099	1.2716	0	1.8282	0.551	0	0.4036	15.0789	0	0.373	17.5177	1.3564	0.885	1.0935	1.2997	0.2632	1.561	1.1417	0	1.4632	1.0698	0	0	0	0	0	0	3.2693	3.2389	0.4821	0.8384	0	0.2007	3.925	3.8344	12.5854	30.8499	20.9096	4.7788	0.2871	5.3867
677776	SCARNA8	non-coding	0	0	0	0	0	0	0	0	0	0	0	0	0	0	0	0	0	0	0	0	0	0	0	0	0	0	0	0	0	0	0	0	0	0	0	0	0	0	0	0	0	0	0	0	0	0	0
677777	SCARNA12	non-coding	4.6948	6.7321	9.7529	5.5659	3.3708	2.2117	7.7428	6.6757	4.6972	1.8282	10.4683	18.3639	7.6675	3.4466	14.9963	4.1032	11.1815	3.7301	17.6991	5.1941	20.0156	2.369	5.6197	6.5649	4.2708	10.8274	11.5004	2.8	15.894	6.4263	11.6592	25.7908	13.6328	4.0866	2.5191	12.7749	8.8032	5.4551	4.013	9.0276	13.8037	7.9108	36.4029	32.9326	4.7788	2.5842	8.4648
677778	SCARNA15	non-coding	0	0	0	0	0	0	0	0	0	0	0	0	0	0	0	0	0	0	0	0	0	0	0	0	0	0	0	0	0	0	0	0	0	0	0	0	0	0	0	0	0	0	0	0	0	0	0
677779	LINC00488	non-coding	0	0	33.6917	0	15.7303	0	0	0	0.4697	0	0	0	0.4036	0	1.1536	0	0	0	0	0	0	0	0	0	20.1337	0	0	0	0.4415	0.4016	0	0	0.6197	1.6347	0	0	0	0	0	0	8.4356	0	0	0.5227	0	4.8812	0
677780	SCARNA11	non-coding	0	0	0	0	0	0	0	0	0	0	0	0	0	0	0	0	0	0	0	0	0	0	0	0	0	0	0	0	0	0	0	0	0	0	0	0	0	0	0	0	0	0	0	0	0	0	0
677781	SCARNA16	non-coding	0.7825	0.792	2.2166	1.1132	0	0.4423	1.6832	1.5894	0.4697	0	0.551	0.5565	0.4036	1.2925	2.3071	0.373	1.8636	0.3391	0.885	0.5467	0.2599	0.2632	0.3122	0.5709	0.3051	0.8779	0.2675	0.4	1.3245	1.6066	3.139	3.4063	0	0.4087	0.7197	0.4821	0.4192	0	0	0.785	2.684	2.1575	1.234	9.932	1.3654	2.0099	2.3086
677784	FAM138D	non-coding	0	0	0	0	3.3708	0	0	0	0	0	0	0	0	0	0	0	0	0	0	0	0	0	0	0	0	0	0	0	0	0	0	0	0	0	0	0	0	0	0	0	0	0	0	0	0	0	0
677792	SNORA1	non-coding	0	0	0	0	0	0	0	0	0	0	0	0	0	0	0	0	0	0	0	0	0	0	0	0	0	0	0	0	0	0	0	0	0	0	0	0	0	0	0	0	0	0	0	0	0	0	0
677793	SNORA2A	non-coding	0	0	0	0	0	0	0	0	0	0	0	0	0	0	0	0	0	0	0	0	0	0	0	0	0.3051	0	0	0	0	0	0	0.9732	0	0	0.3599	0	0	0	0	0	0	0	0.617	1.0455	0	0	0
677794	SNORA2B	non-coding	0	0	0	0	0	0	0	0	0	0	0	0	0	0	0	0	0	0	0	0	0	0	0.3122	0	0	0	0	0	0.4415	0	0	0	0	0	0	0	0	0	0	0	0	0	0	0	0	0	0
677795	SNORA5B	non-coding	0	0	0	0	0	0	0	0	0	0	0	0	0	0	0	0	0	0	0	0.2652	0	0	0	0	0	0	0	0	0.34	0.3213	0	0	0	0	0	0	0	0	0	0	0	0	0	0	0	0	0
677796	SNORA5C	non-coding	0	0	0.8866	0	0	0	0	0	0	0	0	0	0	0	0	0	0	0	0	0	0	0	0	0	0	0	0	0.4	0.4415	0.4016	0	0	0	0	0	0.241	0	0	0	0	0	0	0	0	0	0	0
677797	SNORA7B	non-coding	1.295	3.5086	7.3324	12.0631	9.6404	2.8309	2.1579	3.2997	11.2027	13.1627	4.2259	9.8831	14.887	4.5797	13.5543	10.6794	2.3444	7.6195	8.0619	1.5063	3.2701	1.7241	1.3487	2.4261	4.8687	5.996	12.062	9.52	6.8256	5.6351	6.9462	3.1582	6.3579	9.7834	2.3932	4.0518	2.6116	9.2083	1.4587	8.168	3.9302	0.7623	15.9988	3.1835	10.5508	5.1827	7.2182
677798	SNORA9	non-coding	0	0	0	0	0	0	0	0	0	0	0	0	0	0	0	0	0	0	0	0	0.7226	0	0	0	0	0	0	0	0	0	0	0	0	0	0	0	0	0	0	0	0	0.3272	0.4874	0	0	0	0
677799	SNORA11	non-coding	0	0	0	0	0	0	0	0	0	0	0	0	0	0	0	0	0	0	0	0	0	0.2632	0.3122	0	0	0	0	0	0	0	0	0	0	0	0	0	0	0	0	0	0	0	0	0	0	0	0
677800	SNORA12	non-coding	0	0	0	0	0	0	0	0	0	0	0	0.5565	0.4036	0	0	0	0	0	0.885	0	0.2599	0	0	0.2854	0	0	0	0	0.4415	0.4016	0.4484	0	1.2393	0	0	0	0	0	0.2007	0	0	0	0.617	0.5227	0	0	0
677801	SNORA14A	non-coding	0	0	0	0	0	0	0	0	0	0	0	0	0	0	0	0	0	0	0	0	0	0	0	0	0	0	0	0	0	0	0	0	0	0	0	0.241	0	0	0	0	0	0	0	0	0	0	0
677802	SNORA14B	non-coding	0	0	0	0.3711	0	0	0	0.9537	0	0	0	0	0	0	0	0	0	0	0	0.2734	0	0	0	0	0	0	0	0	0	0.4016	0.4484	0	0	0	0.3599	0	0	0	0.602	0	0	0.3596	0	2.091	0	0	0.3848
677803	SNORA15	non-coding	0	0	0	0	0	0	0	0	0	0	0	0	0.4036	0	0	0	0	0	0	0	0	0	0	0	0	0	0	0.4	0	0	0	0	0	0	0	0.241	0	0	0	0	0	0	0	0	0	0	0.3848
677805	SNORA18	non-coding	0	0	0	0.7236	0	0	0	0.0127	0	0	0	0	0	0	0	0	0	0	0	0	0	0	0	0	0	0	0.4841	0	1.6424	0	0	0	0.2293	0	0	0	0	0	0	0	0	0	0.8576	0	0.4233	0	0
677806	SNORA20	non-coding	0	0	0	0	0	0	0	0	0	0	0	0	0	0	0	0	0	0	0	0	0	0	0	0	0	0	0.8024	0	0	0	0	0.4866	0	0	0	0	0	0	0.4013	0	0	0	0	0	0	0	0
677807	SNORA22	non-coding	0	0	0	0	0	0	0	0	0.4697	0	0	0	0	0	0	0	0	0	0	0	0	0	0	0	0.3051	0	0	0	0	0.4016	0	0	0	0	0	0.4821	0	0	0.2007	0	0	0	0	0	0	0	0
677808	SNORA23	non-coding	0	0.396	0.4433	0	0	0.4423	0.3366	0.3179	0	0	0	0	0	0.8617	0	0.746	1.1182	0	0	0.5467	0	0	0.9366	0	0	0.8779	0.2675	0	0.4415	0.4016	0.8969	1.4599	0	0	0	0.241	0	0.2728	0	0.3925	0.3834	1.7979	2.468	6.2729	0.6827	0	1.9238
677809	SNORA24	non-coding	0	0	0	0	0	0.4423	0	0	0	0	0	0	0	0	0	0.373	0	0.6782	0	0	0	0	0	0	0	0	0	0	0	0	0	0	0	0	0.3599	0.241	0	0	0	0	0	0	0	0	0	0	0
677810	SNORA26	non-coding	0	0	0	0	0	0	0	0	0	0	0	0	0	0	0	0	0	0	0	0	0	0	0	0	0	0	0	0	0	0	0	0	0	0	0	0	0	0	0	0	0	0	0	0	0	0	0
677811	SNORA28	non-coding	0	0	0	0	0	0	0	0	0	0	0	0	0	0	0	0	0	0	0	0	0	0	0	0	0	0	0	0	0	0	0	0	0	0	0	0	0	0	0	0	0	0	0	0	0	0	0
677812	SNORA29	non-coding	0	0	0	0.7421	0	0	0	0	0	0	0	0	0	0	0	0	0	0	0	0	0	0	0	0	0	0	0.2675	0	0	0.4016	0	0.4866	0	0	0	0	0	0	0	0	0	0	0	0	0	0	0
677813	SNORA30	non-coding	0	0	0	0	0	0	0	0	0	0	0	0	0	0	0	0	0	0	0	0	0	0	0	0	0	0	0	0	0	0	0	0	0	0	0	0	0	0	0	0	0	0	0	0	0	0	0
677814	SNORA31	non-coding	0	0	0.4433	1.1132	0	0	0	0.3179	0	0	0	0	0	0	0	0	0	0	0.885	0	0	0	0	0	0	0	0	0	0.4415	0.8033	0	0.4866	0	0	0	0.241	0	0	0	0	0	0	1.234	0	0	0	0
677815	SNORA2C	non-coding	0	0	0	0.3711	0	0	0	0	0	0	0.551	0.5565	0	0	0	0	0	0	0	0.2734	0	0	0	0	0	0.2926	0	0	0.883	0	0	0	0.6197	0	0.3599	0	0	0	0	0	0	0	0	0	0	0	0
677816	SNORA35	non-coding	0	0	0	0	0	0	0	0	0	0	0	0	0	0	0	0	0	0	0	0	0	0	0	0	0	0	0	0	0	0	0	0	0	0	0	0	0	0	0	0	0	0	0	0	0	0	0
677817	SNORA36A	non-coding	0	0	0	0	0	0	0	0	0	0	0	0	0	0	0	0	0	0	0	0	0	0	0	0	0	0	0	0	0	0	0	0	0	0	0	0	0	0	0	0	0	0	0	0	0	0	0
677818	SNORA36B	non-coding	0	0	0	0	0	0	0	0	0	0	0	0	0	0	0	0	0	0	0	0	0	0	0	0	0	0	0	0	0	0	0	0	0	0	0	0	0	0	0	0	0	0	0	0	0	0	0
677819	SNORA37	non-coding	0	0	0	0	0	0	0	0	0	0	0	0	0	0	0	0	0	0.3391	0	0	0	0	0	0	0	0	0	0	0	0	0	0	0	0	0	0	0	0	0	0	0	0	0	0	0	0	0
677820	SNORA38	non-coding	0	0	0	0	0	0	0	0	0	0	0	0	0	0	0	0	0	0	0	0	0	0	0	0	0	0	0	0	0	0	0	0	0	0	0	0	0	0	0	0	0	0	0	0	0	0	0
677821	SNORA71E	non-coding	2.9577	3.3859	6.3704	12.1892	10.9213	2.2869	2.6393	5.9477	7.2336	5.8501	4.4353	4.7858	8.1558	5.3336	0	2.2194	2.4637	6.921	4.4071	3.3598	9.6959	5.4778	1.8483	2.5289	1.5131	3.1838	18.053	7.528	13.2715	5.2174	11.7534	5.6204	4.251	2.0964	3.4296	11.6107	1.8445	8.6818	3.5877	6.5195	2.3044	5.1924	7.1017	7.4229	9.3903	3.3192	3.0127
677822	SNORA40	non-coding	0	0	0.2527	0.0408	0	0	0.2895	0.1367	0	0	0	0	0	0	0	2.0926	0	0	0	0	0	0	0	0	0	0	0	0	2.106	0	1.3767	0.0146	0	0	0	0.0578	0	0	0	0	0	0	0	0	0	0	0
677823	SNORA80E	non-coding	0	0	0	0	0	0	0	0	0	0	0	0	0	0	0	0	0	0	0	0	0	0	0	0	0.3051	0	0.2675	0	0	0	0	0	0	0	0	0	0	0	0	0	0	0	0	0	0	0	0
677825	SNORA44	non-coding	0	0	0	0.449	0	0	0	0	0	0	0	0	0	0	0	0	0	0	0	0	0	0	0	0	0	0	0	0	0	0	0	0	0	0	0	0	0	0	0	0	0	0	0	0	0	0	0
677826	SNORA3B	non-coding	0	0	0.8866	0	0	0	0	0.9537	0	0	0	0	0.4036	0	0	0.373	0	0	0	0	0	0	0	0	0	0	0	0	0.883	0.4016	0	0.4866	0	0	0	0	0	0	0	0	0	0	0	0	0	0	0
677827	SNORA46	non-coding	0	0	0	0	0	0.8847	0.3366	0	0	0	0	0	0	0	0	0	0	0	0	0	0	0	0	0	0	0	0	0	0.4415	0	0	0	0	0	0	0	0	0	0	0	0	0	0	0	0	0	0
677828	SNORA47	non-coding	0	0	0.4433	0	0	0	0	0	0	0	0	0	0	0	0	0	0	0	0	0	0	0	0	0	0	0	0.2675	0	0	0.4016	0	0	0	0	0	0	0	0	0	0	0	0.7192	0	0	0	0	0
677829	SNORA49	non-coding	0	0	0	0	0	0	0	0	0	0	0	0	0	0	0	0	0	0	0	0	0	0	0	0.2854	0	0	0	0	0	0.8033	0	0	0	0.4087	0	0	0	0	0	0	0	0	0	0	0.3413	0	0
677830	SNORA50A	non-coding	0	0	0	0	0	0	0	0	0	0	0	0	0	0	0	0	0	0	0	0	0	0	0	0	0	0.2926	0	0	0	0	0	0	0	0	0	0	0	0	0	0	0	0	0	0	0	0	0
677831	SNORA51	non-coding	0	0	0	0	0	0	0	0	0	0	0	0	0	0	0	0	0	0	0	0	0	0	0	0.2854	0	0	0	0	0	0.4016	0	0	0	0	0	0	0	0	0	0	0	0	0	0	0	0	0
677832	SNORA53	non-coding	1.1737	0.792	1.7732	1.1132	2.2472	0.4423	0.3366	0.9537	0.4697	0	1.1019	1.113	1.6142	1.2925	1.1536	1.119	2.2363	1.3564	0	0	0.5199	0.5265	0.3122	1.1417	0	2.0484	2.1396	0.4	2.649	0.8033	0.4484	1.4599	1.859	0.4087	0.7197	0.9641	1.2576	0.5455	1.0033	3.5325	1.1503	2.8767	6.17	5.7501	0	0	1.1543
677833	SNORA54	non-coding	0	0	0	0	0	0	0	0	0	0	0	0	0	0	0	0	0	0	0	0	0	0	0	0	0	0	0	0	0	0	0	0	0	0	0	0	0	0	0	0	0	0	0	0	0	0	0
677834	SNORA55	non-coding	0	0	0	0	0	0	0	0	0	0	0	0	0	0	0	0	0	0	0	0	0	0	0	0	0	0	0.2675	0	0	0	0	0	0.6197	0	0	0	0	0	0	0	0	0	1.234	1.0455	0	0	0
677835	SNORA56	non-coding	0	0	0	0	0	0	0	0	0	0	0	0	0	0	0	0	0	0	0	0	0	0	0	0	0	0	0	0	0	0	0.8969	0	0.6197	0	0	0	0	0	0	0	0	0	0	0	0	0	0
677836	SNORA58	non-coding	0	0	0	0	0	0	0	0	0	0	0	0	0	0	0	0	0	0	0	0	0	0	0	0	0	0	0	0	0	0	0	0	0	0	0	0	0	0	0	0	0	0	0	0	0	0	0
677838	SNORA61	non-coding	0	0	1.8309	0	0	0	0	0	0.108	0	0	0	0	0	0	0	0	0	0	0.2269	0	0	0	0	0	0	0	0.036	0	0	0.5067	0	0	0	0	0.0723	0	0	0.313	0	0	0	0	0.8155	0	0	0
677839	SNORA71C	non-coding	0	0	0	0	0	0	0	0.3179	0	0	0	0.5565	0	0	0	0	0	0	0.885	0.2734	0	0	0.3122	0	0	0	0.2675	0	0.4415	0.8033	0	0	0	0	0	0	0	0	0	0	0	0	0	0	0	0	0
677840	SNORA71D	non-coding	0	0	0	0	0	0	0	0	0	0	0	0	0	0	0	0	0.3727	0	0	0	0	0	0.6244	0	0	0	0	0	0	0	0	0	0	0	0	0	0.4192	0	0	0	0	0	0	0	0	0	0
677841	SNORA74B	non-coding	0	0	0	0.3711	0	0.4423	0.3366	0.3179	0	0	0	0	0	0.4308	0	0.746	0.7454	0	0	0	0.2599	0	0.6244	0	0	0	0	0	0.4415	0.4016	0.4484	0	0	0	1.0796	0	0	0	0	0.785	0	1.4383	0	0.5227	0.3413	0	0
677842	SNORA50C	non-coding	0	0	0	0.3711	0	0	0	0	0	0	0	1.113	0.4036	0	1.1536	0.373	0	0	1.7699	0	0.2599	0	0	0	0	0.2926	0.2675	0.8	0.883	1.2049	0.4484	2.9197	5.5771	0.8173	0	0.241	0	0	0.2007	0	0	0	6.17	2.6137	0	0	0
677843	SNORA77	non-coding	0	0	0	0	0	0	0	0	0	0	0	0	0	0	0	0	0	0	0	0	0	0	0	0	0	0	0	0	0	0	0	0	0	0	0	0	0	0	0	0	0	0	0	0	0	0	0
677844	SNORA78	non-coding	0	0	0	0	0	0	0	0	0	0	0	0	0	0	0	0	0	0	0	0	0	0	0	0	0	0	0	0	0.4415	0	0	0	0	0	0	0	0	0	0	0	0	0	0	0	0	0	0
677845	SNORA79	non-coding	0	0	0	0	0	0	0	0	0	0	0	0	0	0	0	0	0	0	0	0	0	0	0	0	0	0	0	0	0	0	0	0	0	0	0	0	0	0	0	0	0	0	0	0	0	0	0
677846	SNORA80A	non-coding	0	0	0	0	0	0	0	0	0	0	0	0	0	0	0	0	0	0	0	0	0	0	0	0	0	0	0	0	0	0	0	0	0	0	0	0	0	0	0	0	0	0	0	0	0	0	0
677847	SNORA81	non-coding	1.1737	0	0.4433	2.5974	0	0	1.0099	1.2716	0.9394	0	0	0.5565	0.8071	0	1.1536	0.373	2.9817	0.6782	0	0.5467	2.5994	0.5265	1.561	1.4271	0.6101	0.5853	0.8024	0.4	2.2075	0.8033	2.6906	6.326	0.6197	2.0433	0.3599	0	0	0	0.8026	0.785	1.1503	1.7979	0	0	0	0.2871	0.3848
677848	SNORD1A	non-coding	0	0	0	0	0	0	0	0	0	0	0	0	0	0	0	0	0	0	0	0	0	0	0	0	0	0	0	0	0	0	0	0	0	0	0	0	0	0	0	0	0	0	0	0	0	0	0
677849	SNORD1B	non-coding	0	0	0	0	0	0	0	0	0	0	0	0	0	0	0	0	0	0	0	0	0	0	0	0	0	0	0	0	0	0	0	0	0	0	0	0	0	0	0	0	0	0	0	0	0	0	0
677850	SNORD1C	non-coding	59.597	41.5688	62.8926	72.9573	72.2809	21.3734	22.986	53.7678	43.5755	24.8995	36.2094	86.6388	52.5827	17.8535	50.5374	32.7023	26.5486	51.6887	42.1416	19.825	26.7169	22.4796	17.2963	18.8212	47.2258	25.3362	28.8633	53.38	41.4879	40.3374	31.8475	165.971	63.8637	51.2342	16.9465	74.5598	22.6242	49.1835	26.8412	65.7678	35.7362	3.4987	12.0993	51.2075	32.3795	21.1011	22.0931
677882	SNORA59B	non-coding	0	0.396	0	0.3711	0	0	0	0.3179	0	0	1.6529	0	0	0	0	0.746	0.7454	0.3391	0.885	0	0.5199	0.2632	0	0.8563	0	0.2926	0	0.4	0	0.8033	0	1.9465	0	0.4087	0	0.241	0.4192	0	0	0.3925	0	0	0	1.5682	0.3413	0.5743	0
678655	CD27-AS1	non-coding	597.171	318.908	354.906	261.046	372.843	172.275	309.056	202.839	305.611	400.75	325.394	186.388	431.945	225.538	1055.22	213.831	253.168	213.645	290.133	270.003	1061.97	205.12	303.288	245.617	288.635	255.194	582.182	106.912	454.702	119.353	565.386	224.842	323.873	345.337	293.693	185.449	402.767	284.316	213.57	255.021	695.625	484.034	144.051	1220.95	208.6	290.245	223.194
684959	SNORA25	non-coding	0	0	0	0	0	0	0	0	0	0	0	0	0	0	0	0	0	0	0	0	0	0	0	0	0	0.2926	0	0	0	0	0	0.4866	0	0	0	0	0	0	0	0	0	0	0	0	0	0	0
692053	SNORD9	non-coding	0	0	0	0	0	0	0	0	0	0	0	0	0	0	0	0	0	0	0	0	0	0	0	0	0	0	0	0	0	0	0	0	0	0	0	0	0	0	0	0	0	0	0	0	0	0	0
692057	SNORD12	non-coding	0	0	0	0	0	0	0	0	0	0	0	0	0	0	0	0	0	0	0	0	0	0	0	0	0	0	0	0	0	0	0	0	0	0	0	0	0	0	0	0	0	0	0	0	0	0	0
692058	SNORD11	non-coding	0	0	0	0	0	0	0	0	0	0	0	0	0	0	0	0	0	0	0	0	0	0	0	0	0	0	0	0	0	0	0	0	0	0	0	0	0	0	0	0	0	0	0	0	0	0	0
692063	SNORA32	non-coding	0	0	0	0	0	0	0	0	0	0	0	0	0	0	0	0	0	0	0	0	0	0	0	0	0	0	0	0	0	0	0	0	0	0	0	0	0	0	0	0	0	0	0	0	0	0	0
692072	SNORD5	non-coding	0	0	0	0	0	0	0	0	0	0	0	0	0	0	0	0	0	0	0	0	0	0	0	0	0	0	0	0	0	0	0	0	0	0	0	0	0	0	0	0	0	0	0	0	0	0	0
692073	SNORA16A	non-coding	0	0	0	0	0	0	0	0	0	0	0	0	0	0	0	0	0	0	0	0	0	0	0	0	0	0	0	0	0	0	0	0	0	0	0	0	0	0	0	0	0	0	0	0.2927	0	0	0
692075	SNORD6	non-coding	0	0	0	0	0	0	0	0	0	0	0	0	0	0	0	0	0	0	0	0	0	0	0	0	0	0	0	0	0	0	0	0	0	0	0	0	0	0	0	0	0	0	0	0	0	0	0
692076	SNORD7	non-coding	0	0	0	0	0	0	0	0	0	0	0	0	0	0	0	0	0	0	0	0	0	0	0	0	0	0	0	0	0	0	0	0	0	0	0	0	0	0	0	0	0	0	0	0	0	0	0
692085	SNORD45C	non-coding	0	0	0	0	0	0	0	0	0	0	0	0	0	0	0	0	0	0	0	0	0	0	0	0	0	0	0	0	0	0	0	0	0	0	0	0	0	0	0	0	0	0	0	0	0	0	0
692086	SNORD17	non-coding	5.0861	1.98	3.5465	1.1132	14.6067	8.8466	9.7627	0.9537	0	1.8282	3.8567	3.8954	1.2107	15.0789	4.6142	2.2381	20.8722	6.782	2.6549	4.1006	7.0185	1.8426	6.5564	14.5569	0.6101	5.56	5.0816	2.4	10.596	4.0165	3.139	6.326	3.0984	4.0866	5.758	5.5438	6.288	0.5455	0.4013	6.6726	7.6687	11.1471	75.8908	9.4093	3.0721	1.1485	5.7715
692087	SNORD49B	non-coding	0	0	0	0	0	0	0	0	0	0	0	0	0	0	0	0	0	0	0	0	0	0	0	0	0	0	0	0	0	0	0	0	0	0	0	0	0	0	0	0	0	0	0	0	0	0	0
692088	SNORD50B	non-coding	0	0	0	0	0	0	0	0	0	0	0	0	0	0	0	0	0	0	0	0	0	0	0	0	0	0	0	0	0	0	0	0	0	0	0	0	0	0	0	0	0	0	0	0	0	0	0
692089	SNORD19	non-coding	0	0	0	0	0	0	0	0	0	0	0	0	0	0	0	0	0	0	0	0	0	0	0	0	0	0	0	0	0	0	0	0	0	0	0	0	0	0	0	0	0	0	0	0	0	0	0
692090	SNORD59B	non-coding	0	0	0	0	0	0	0	0	0	0	0	0	0	0	0	0	0	0	0	0	0	0	0	0	0	0	0	0	0	0	0	0	0	0	0	0	0	0	0	0	0	0	0	0	0	0	0
692091	SNORD23	non-coding	0	0	0	0	0	0	0	0	0	0	0	0	0	0	0	0	0	0	0	0	0	0	0	0	0	0	0	0	0	0	0	0	0	0	0	0	0	0	0	0	0	0	0	0	0	0	0
692092	SNORD32B	non-coding	0	0	0	0	0	0	0	0	0	0	0	0	0	0	0	0	0	0	0	0	0	0	0	0	0	0	0	0	0	0	0	0	0	0	0	0	0	0	0	0	0	0	0	0	0	0	0
692099	FAM86DP	non-coding	59.8592	85.5374	139.643	102.412	100	100.852	105.706	76.2934	74.2151	120.658	11.0193	88.4808	94.431	179.224	64.5993	91.0158	88.7067	66.8023	287.611	80.9185	127.372	47.1177	133.312	86.1995	82.9753	86.0341	63.3859	47.6	166.446	78.3211	85.6502	209.246	84.8954	148.345	103.284	88.2193	107.734	104.739	112.566	86.7432	152.224	213.233	64.1678	54.3649	77.4842	83.5547	234.321
692106	SNORD65	non-coding	0	0	0	0	0	0	0	0	0	0	0	0	0	0	0	0	0	0	0	0	0	0	0	0	0	0	0	0	0	0	0	0	0	0	0	0	0	0	0	0	0	0	0	0	0	0	0
692107	SNORD66	non-coding	0	0	0	0	0	0	0	0	0	0	0	0	0	0	0	0	0	0	0	0	0	0	0	0	0	0	0	0	0	0	0	0	0	0	0	0	0	0	0	0	0	0	0	0	0	0	0
692108	SNORD67	non-coding	0	0	0	0	0	0	0	0	0	0	0	0	0	0	0	0	0	0	0	0	0	0	0	0	0	0	0	0	0	0	0	0	0	0	0	0	0	0	0	0	0	0	0	0	0	0	0
692109	SNORD69	non-coding	0	0	0	0	0	0	0	0	0	0	0	0	0	0	0	0	0	0	0	0	0	0	0	0	0	0	0	0	0	0	0	0	0	0	0	0	0	0	0	0	0	0	0	0	0	0	0
692110	SNORD70	non-coding	0	0	0	0	0	0	0	0	0	0	0	0	0	0	0	0	0	0	0	0	0	0	0	0	0	0	0	0	0	0	0	0	0	0	0	0	0	0	0	0	0	0	0	0	0	0	0
692111	SNORD71	non-coding	0	0	0	0	0	0	0	0	0	0	0	0	0	0	0	0	0	0	0	0	0	0	0	0	0	0	0	0	0	0	0	0	0	0	0	0	0	0	0	0	0	0	0	0	0	0	0
692148	SCARNA10	non-coding	5.4773	2.376	0	0.3711	2.2472	4.4233	8.7527	0.6358	0.4697	0	2.2039	6.1213	1.2107	14.6481	1.1536	0.373	30.9355	0.6782	0.885	2.7337	6.7585	0.2632	5.6197	1.4271	2.7455	4.0969	1.0698	1.2	2.2075	0	1.7937	1.4599	1.859	6.9473	8.637	3.3745	3.3536	1.9093	0.8026	10.9901	14.5706	48.9033	54.2959	60.6377	5.1201	0.2871	11.1581
692149	SCARNA14	non-coding	0	0	0	0	0	0	0	0	0	0	0	0	0	0	0	0	0	0	0	0	0	0	0	0	0	0	0	0	0	0	0	0	0	0	0	0	0	0	0	0	0	0	0	0	0	0	0
692157	SNORA16B	non-coding	0	0	0	0	0	0	0	0	0	0	0	0	0	0	0	0	0	0.3391	0	0	0	0	0	0	0	0	0	0	0	0	0	0	0	0	0	0	0	0	0	0	0	0	0	0	0	0	0
692158	SNORA57	non-coding	0	0	0.4433	0	1.1236	0	0.6733	0	0	0	0	0	0	0.8617	0	0	1.4909	0	1.7699	0	0	0.2632	0.3122	0	0	0.8779	0.2675	0.4	0.883	1.2049	0.4484	0.9732	0	0.4087	0.3599	0.241	0.4192	0	0	0.785	0.7669	3.9554	1.851	1.0455	0	0	0.3848
692195	SNORD75	non-coding	0	0	0	0	0	0	0	0	0	0	0	0	0	0	0	0	0	0	0	0	0	0	0	0	0	0	0	0	0	0	0	0	0	0	0	0	0	0	0	0	0	0	0	0	0	0	0
692196	SNORD76	non-coding	0	0	0	0	0	0	0	0	0	0	0	0	0	0	0	0	0	0	0	0	0	0	0	0	0	0	0	0	0	0	0	0	0	0	0	0	0	0	0	0	0	0	0	0	0	0	0
692197	SNORD77	non-coding	0	0	0	0	0	0	0	0	0	0	0	0	0	0	0	0	0	0	0	0	0	0	0	0	0	0	0	0	0	0	0	0	0	0	0	0	0	0	0	0	0	0	0	0	0	0	0
692198	SNORD78	non-coding	0	0	0	0	0	0	0	0	0	0	0	0	0	0	0	0	0	0	0	0	0	0	0	0	0	0	0	0	0	0	0	0	0	0	0	0	0	0	0	0	0	0	0	0	0	0	0
692199	SNORD84	non-coding	0	0	0	0	0	0	0	0	0	0	0	0	0	0	0	0	0	0	0	0	0	0	0	0	0	0	0	0	0	0	0	0	0	0	0	0	0	0	0	0	0	0	0	0	0	0	0
692200	SNORD103C	non-coding	0	0	0	0	0	0	0	0	0	0	0	0	0	0	0	0	0	0	0	0	0	0	0	0	0	0	0	0	0	0	0	0	0	0	0	0	0	0	0	0	0	0	0	0	0	0	0
692201	SNORD86	non-coding	0	0	0	0	0	0	0	0	0	0	0	0	0	0	0	0	0	0	0	0	0	0	0	0	0	0	0	0	0	0	0	0	0	0	0	0	0	0	0	0	0	0	0	0	0	0	0
692202	SNORD88A	non-coding	0	0	0	0	0	0	0	0	0	0	0	0	0	0	0	0	0	0	0	0	0	0	0	0	0	0	0	0	0	0	0	0	0	0	0	0	0	0	0	0	0	0	0	0	0	0	0
692203	SNORD88B	non-coding	0	0	0	0	0	0	0	0	0	0	0	0	0	0	0	0	0	0	0	0	0	0	0	0	0	0	0	0	0	0	0	0	0	0	0	0	0	0	0	0	0	0	0	0	0	0	0
692204	SNORD88C	non-coding	0	0	0	0	0	0	0	0	0	0	0	0	0	0	0	0	0	0	0	0	0	0	0	0	0	0	0	0	0	0	0	0	0	0	0	0	0	0	0	0	0	0	0	0	0	0	0
692205	SNORD89	non-coding	0	0	0	0	0	0	0	0	0	0	0	0	0	0	0	0	0	0	0	0	0	0	0	0	0	0	0	0	0	0	0.8969	0	1.2393	0	0	0	0	0	0	0	0	0	0	0	0	0	0
692206	SNORD90	non-coding	0	0	0	0	0	0	0	0	0	0	0	0	0	0	0	0	0	0	0	0	0	0	0	0	0	0	0	0	0	0	0	0	0	0	0	0	0	0	0	0	0	0	0	0	0	0	0
692207	SNORD91A	non-coding	0	0	0	0	0	0	0	0	0	0	0	0	0	0	0	0	0	0	0	0	0	0	0	0	0	0	0	0	0	0	0	0	0	0	0	0	0	0	0	0	0	0	0	0	0	0	0
692208	SNORD91B	non-coding	0	0	0	0	0	0	0	0	0	0	0	0	0	0	0	0	0	0	0	0	0	0	0	0	0	0	0	0	0	0	0	0	0	0	0	0	0	0	0	0	0	0	0	0	0	0	0
[truncated: 404 more rows]
[truncated: 368 more columns]
